# Supplementary material for: Whole-genome sequencing and gene network modules predict gemcitabine/carboplatin-induced myelosuppression in non-small cell lung cancer patients
Source: PubMed Central journal article supplement (PMC7445166; doi:10.1038/s41540-020-00146-6), 2020-08-24
Supplement: 41540_2020_146_MOESM1_ESM.pdf [file 41540_2020_146_MOESM1_ESM.pdf]

# Whole-genome sequencing and gene network modules predict gemcitabine/carboplatin-induced myelosuppression in non-small cell lung cancer patients

Niclas Björn<sup>1\*</sup>, Tejaswi Venkata Satya Badam<sup>2,3</sup>, Rapolas Spalinskas<sup>4</sup>, Eva Brandén<sup>5,6</sup>, Hirsh Koyi<sup>5,6</sup>, Rolf Lewensohn<sup>7</sup>, Luigi De Petris<sup>7</sup>, Zelmina Lubovac-Pilav<sup>3</sup>, Pelin Sahlén<sup>4</sup>, Joakim Lundeberg<sup>4</sup>, Mika Gustafsson<sup>2</sup>, and Henrik Gréen<sup>1,4,8</sup>

<sup>1</sup>Clinical Pharmacology, Division of Drug Research, Department of Biomedical and Clinical Sciences, Linköping University, Linköping, Sweden.

<sup>2</sup>Bioinformatics, Department of Physics, Chemistry and Biology, Linköping University, Linköping, Sweden.

<sup>3</sup>School of Bioscience, Systems Biology Research Centre, University of Skövde, Skövde, Sweden.

<sup>4</sup>Science for Life Laboratory, School of Engineering Sciences in Chemistry, Biotechnology and Health, Department of Gene Technology, KTH Royal Institute of Technology, Solna, Sweden.

<sup>5</sup>Department of Respiratory Medicine, Gävle Hospital, Gävle, Sweden.

<sup>6</sup>Centre for Research and Development, Uppsala University/Region Gävleborg, Gävle, Sweden.

<sup>7</sup>Thoracic Oncology Unit, Tema Cancer, Karolinska University Hospital, and Department of Oncology-Pathology, Karolinska Institutet, Stockholm, Sweden.

<sup>8</sup>Department of Forensic Genetics and Forensic Toxicology, National Board of Forensic Medicine, Linköping, Sweden.

\* Corresponding author: Niclas Björn ([niclas.bjorn@liu.se](mailto:niclas.bjorn@liu.se)).

## Supplementary File

In this PDF the Supplementary Figures (1-6) and Supplementary Tables (1-10) are presented.

## Supplementary Figures

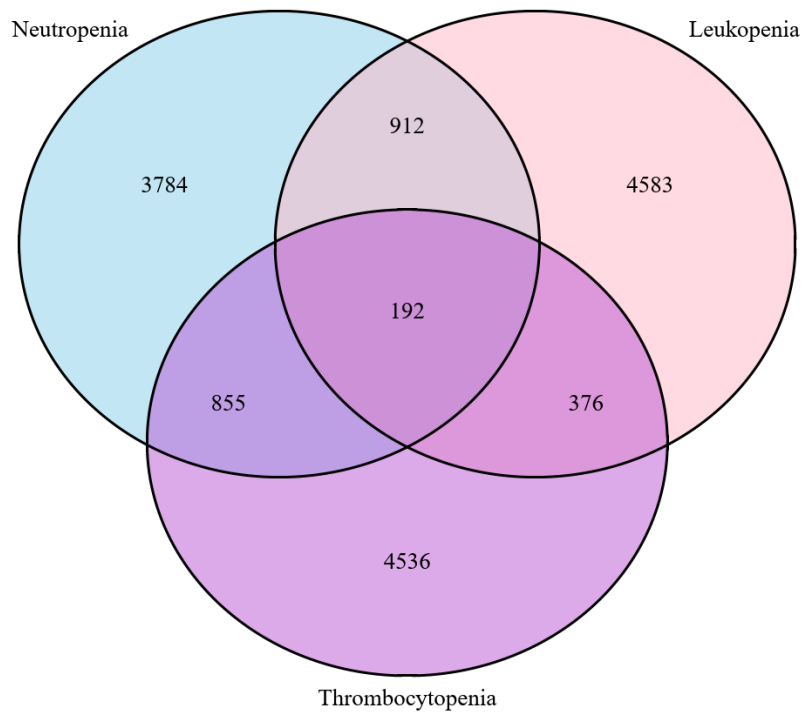

**Supplementary Figure 1.** Venn diagram showing the number of nominally significant ( $p \leq 1 \times 10^{-3}$ ) genetic variants (SNVs/INDELs) for the three toxicity phenotypes neutropenia, leukopenia, and thrombocytopenia as well as their overlaps.

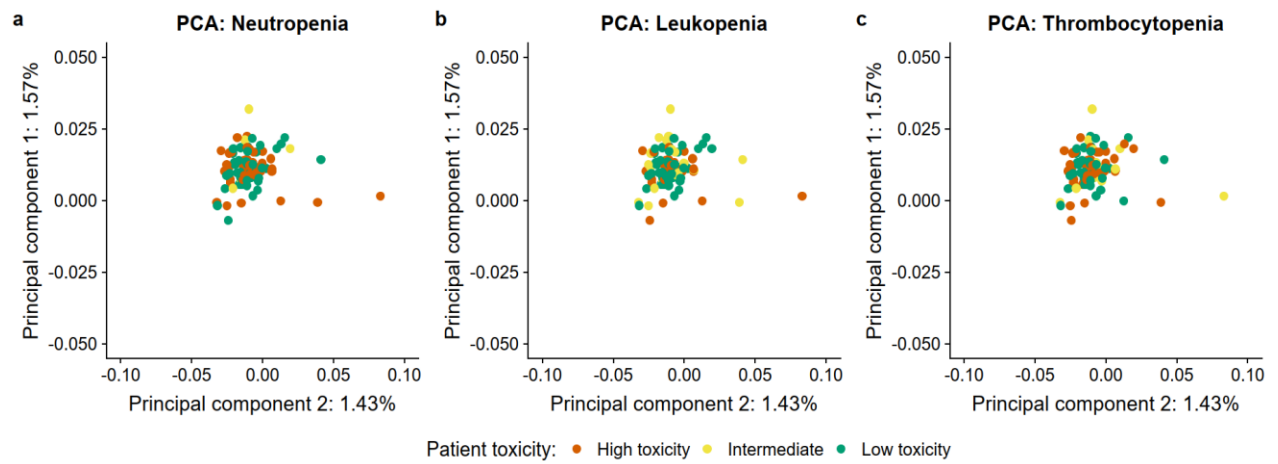

**Supplementary Figure 2.** Principal component analysis (PCA) using all filtered SNVs/INDELs. The first principal component explains 1.57% of the variability while the second principal component explains 1.43%. No apparent clustering can be observed when color-coding the samples according to the respective toxicities neutropenia (a), leukopenia (b), or thrombocytopenia (c).

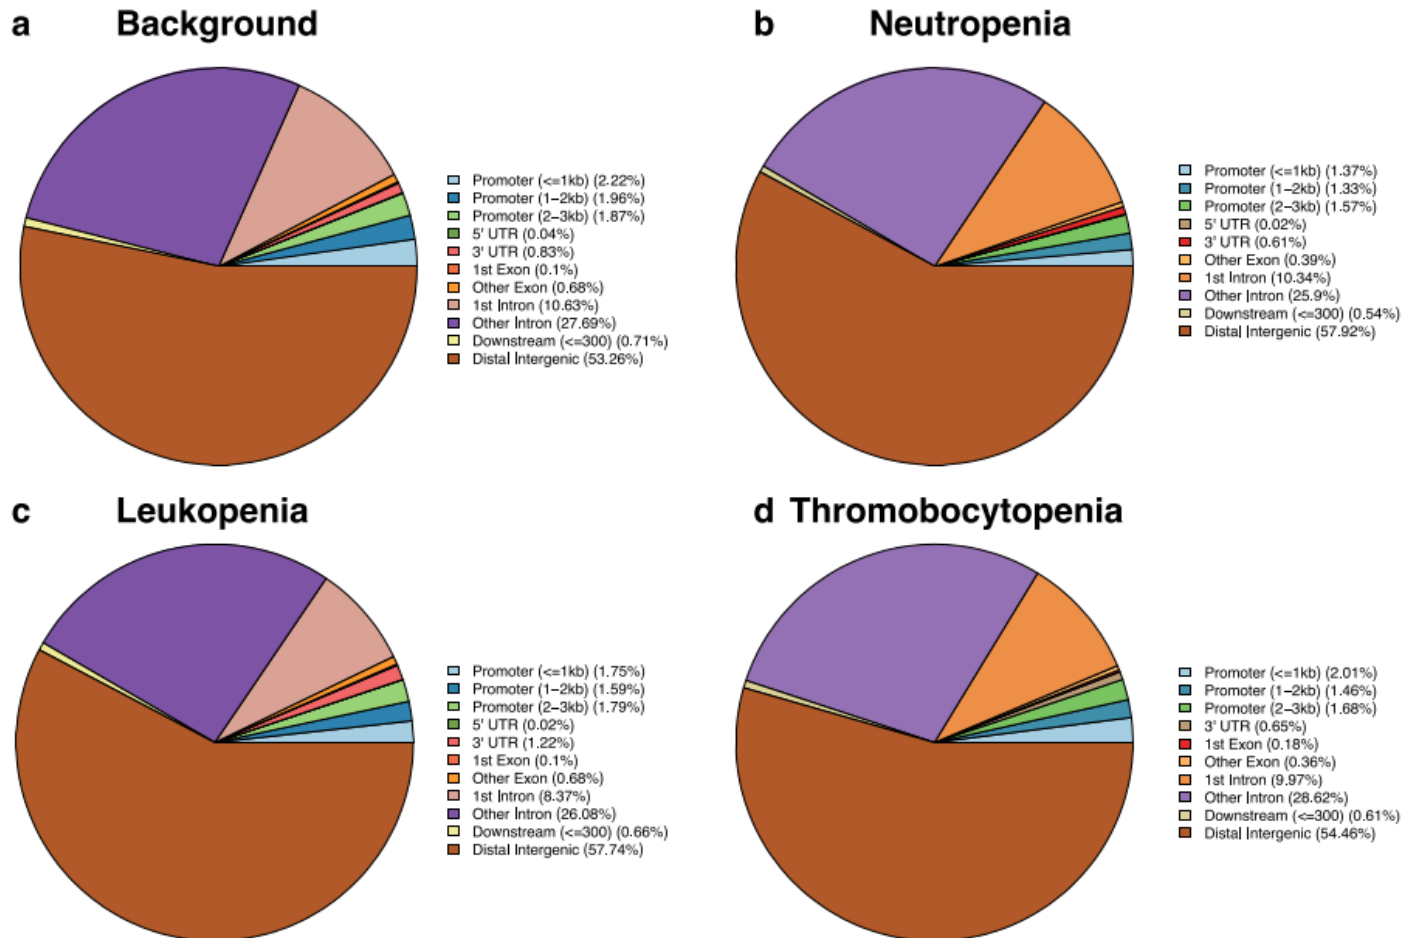

**Supplementary Figure 3.** Annotation of genetic variants. The distribution of all genetic variants, i.g. the background distribution is shown in (a). The distributions of the nominally significant ( $p \leq 1 \times 10^{-3}$ ) genetic variants are shown for neutropenia (b), leukopenia (c), and thrombocytopenia (d). Interestingly, a slight enrichment of the proportion of distal intergenic variants is seen in (b), (c), and (d) compared to the background in (a).

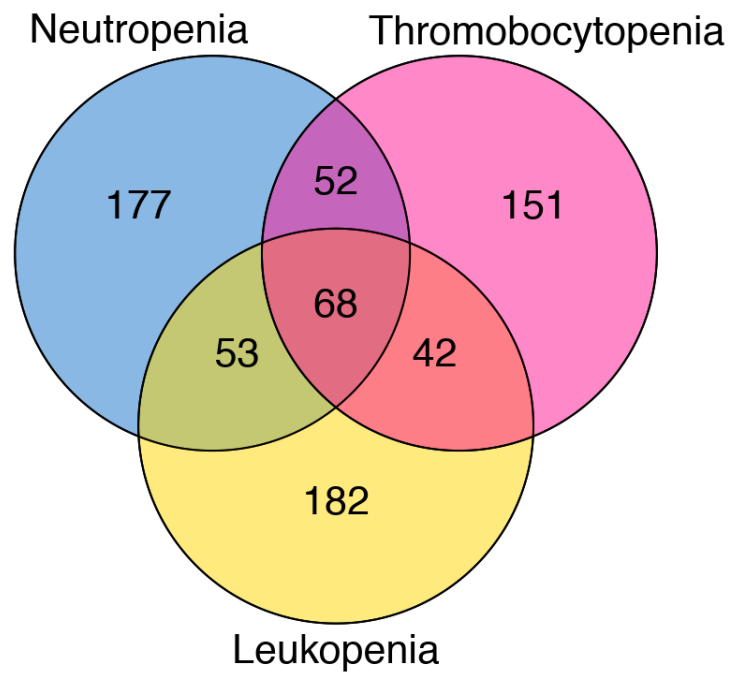

**Supplementary Figure 4.** Venn diagram showing the number of genes in the MCODE modules for the three toxicity phenotypes neutropenia, leukopenia, and thrombocytopenia as well as their overlap.

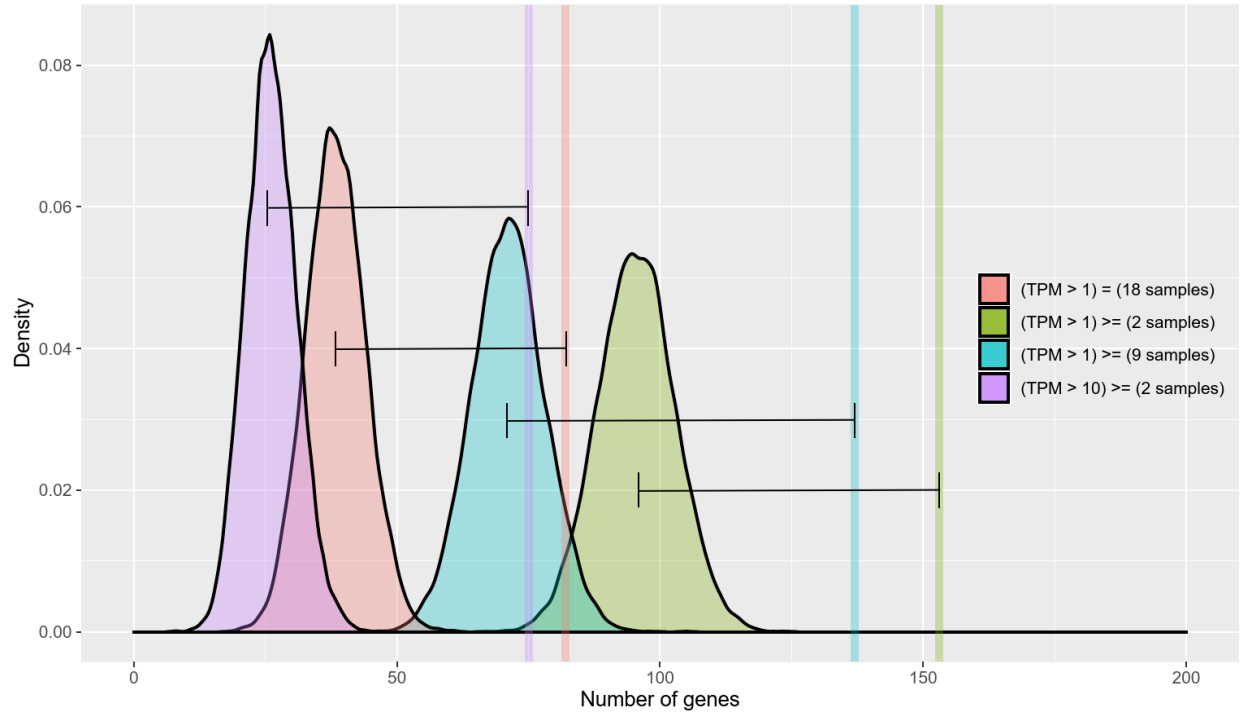

**Supplementary Figure 5.** The number of genes expressed in the 18 samples (duplicates of 3 cell lines under 3 conditions (gemcitabine, carboplatin or untreated)) above the specific transcripts per million (TPM) thresholds by our 215 toxicity module genes are represented by the four lines in the graph. We also did 10000 permutations randomly selecting 215 genes from the RNA-seq data (after removing zeros in the data the random selections were made from 27424 gene fragments (of which 12166 have TPM >1 in at least 2 samples)) and the histograms represent the distribution of the number of fragments over the specific TPM thresholds. We can see that more genes are expressed in the cell lines, at all TPM thresholds, than what is expected by chance.

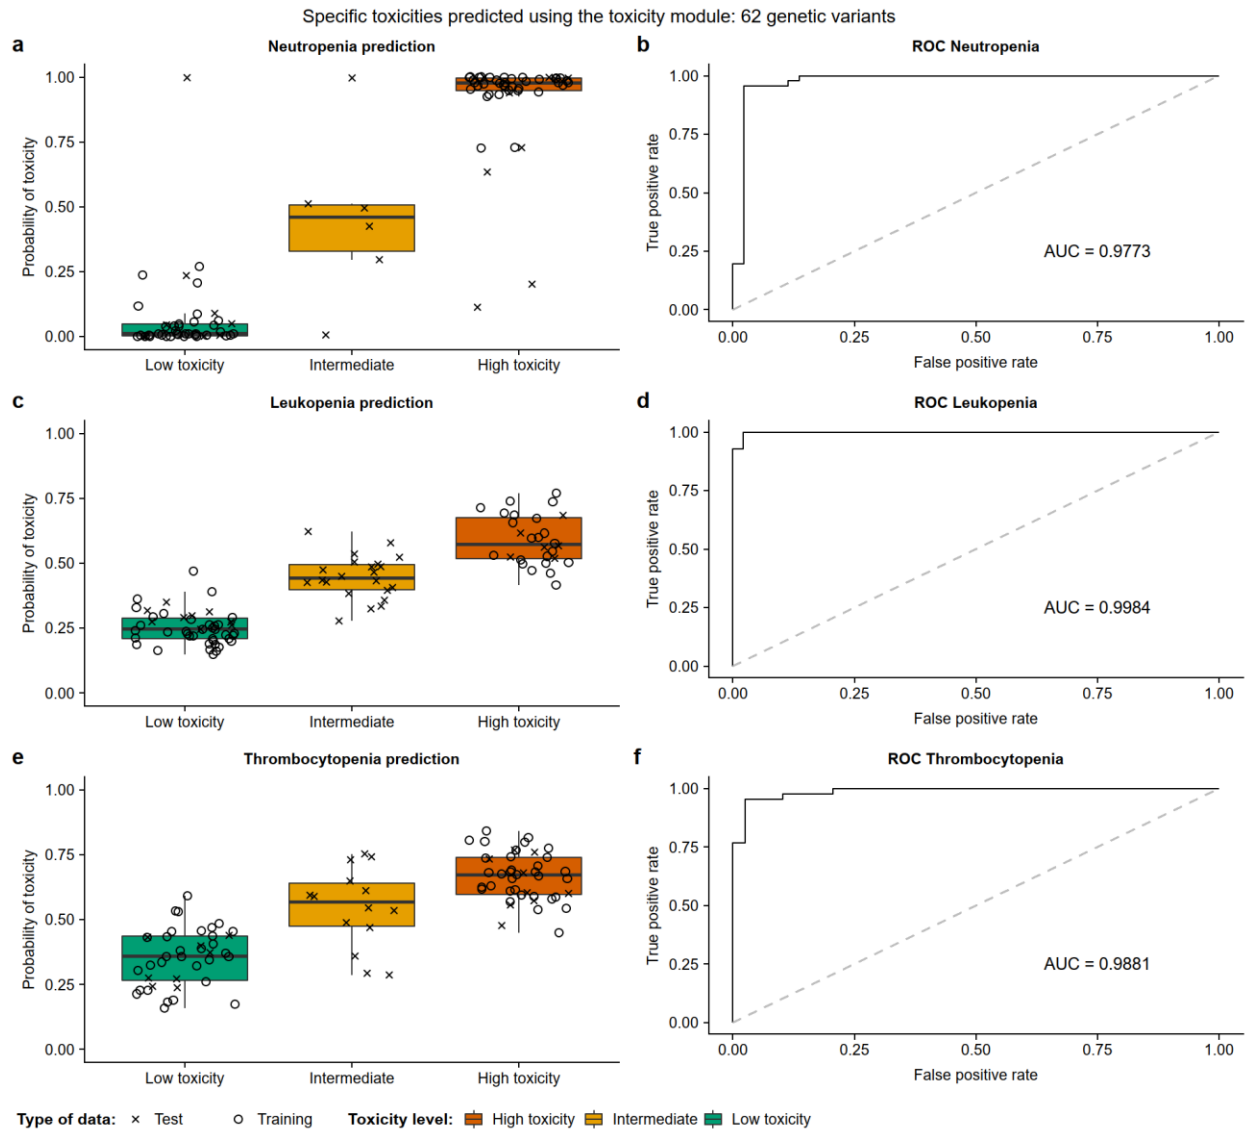

**Supplementary Figure 6.** Shows the prediction of neutropenia, leukopenia, and thrombocytopenia using the 62 genetic variants from the best maximal toxicity prediction model based on the toxicity module. a) Patients (separated by registered neutropenia) and their predicted probability of neutropenia. b) ROC curve of the model's predictions of high and low neutropenia. c) Patients (separated by registered leukopenia) and their predicted probability of leukopenia. d) ROC curve of the model's predictions of high and low leukopenia. e) Patients (separated by registered thrombocytopenia) and their predicted probability of thrombocytopenia. f) ROC curve of the model's predictions of high and low thrombocytopenia.

Note that the intermediates are not used for calculating the ROC. The box-plot elements should be interpreted as the following: centerline, median; box limits, upper and lower quartiles; whiskers, 1.5x interquartile range.

## Supplementary Tables

On the following pages the supplementary tables are presented. These supplementary tables are also available in their original .xlsx format from the corresponding author (NB, [niclas.bjorn@liu.se](mailto:niclas.bjorn@liu.se)).

**Supplementary Table 1.** Nominally significant genetic variants for neutropenia.

**Supplementary Table 2.** Nominally significant genetic variants for leukopenia.

**Supplementary Table 3.** Nominally significant genetic variants for thrombocytopenia.

**Supplementary Table 4.** All MCODE module genes.

**Supplementary Table 5.** Module rat data enrichment comparison.

**Supplementary Table 6.** Toxicity module genes expressed in cell lines.

**Supplementary Table 7.** Differentially expressed toxicity module genes.

**Supplementary Table 8.** Enriched KEGG pathways and Gene Ontologies.

**Supplementary Table 9.** Coefficients for all prediction models.

**Supplementary Table 10.** Number of training and test data samples.



**Supplementary Table 1.** All nominally significant ( $p \leq 0.001$ ) genetic variants (SNVs/INDELs) for neutropenia as determined by Fisher's exact test.

| rsID        | Chromosome | Position | Minor allele | Minor allele frequency among cases | Minor allele frequency among controls | Major allele         | p-value   |
|-------------|------------|----------|--------------|------------------------------------|---------------------------------------|----------------------|-----------|
| rs202004563 | 1          | 63643    | G            | 11                                 | 0                                     | A                    | 0.0006945 |
| rs201637762 | 1          | 103058   | T            | 11                                 | 0                                     | C                    | 0.0007228 |
| rs375234444 | 1          | 103234   | A            | 11                                 | 0                                     | G                    | 0.0007086 |
| rs368811019 | 1          | 124064   | A            | 11                                 | 0                                     | C                    | 0.0007274 |
| 1:668641    | 1          | 668641   | G            | 17                                 | 2                                     | T                    | 0.0004014 |
| rs28595293  | 1          | 1122915  | G            | 13                                 | 32                                    | A                    | 0.0009401 |
| rs6684820   | 1          | 1124663  | A            | 13                                 | 32                                    | G                    | 0.0009401 |
| rs78174849  | 1          | 1128778  | CTTA         | 18                                 | 39                                    | C                    | 0.0004141 |
| rs9727857   | 1          | 1130843  | G            | 12                                 | 32                                    | A                    | 0.0004387 |
| rs9329409   | 1          | 1131581  | C            | 13                                 | 32                                    | T                    | 0.0009401 |
| rs2274789   | 1          | 1133077  | G            | 12                                 | 32                                    | A                    | 0.0004387 |
| rs12031928  | 1          | 1133273  | C            | 12                                 | 32                                    | T                    | 0.0004387 |
| rs12405246  | 1          | 1133787  | C            | 12                                 | 32                                    | T                    | 0.0004387 |
| rs35009659  | 1          | 1133815  | C            | 12                                 | 32                                    | T                    | 0.0004387 |
| rs9729550   | 1          | 1135242  | C            | 12                                 | 32                                    | A                    | 0.0004387 |
| rs1815606   | 1          | 1140435  | T            | 20                                 | 42                                    | G                    | 0.0002952 |
| rs12760917  | 1          | 4770065  | C            | 46                                 | 21                                    | T                    | 0.0003668 |
| rs2235516   | 1          | 14140457 | A            | 20                                 | 4                                     | G                    | 0.0007606 |
| rs2697960   | 1          | 14153837 | A            | 23                                 | 5                                     | G                    | 0.0003619 |
| rs2744677   | 1          | 14154723 | G            | 30                                 | 8                                     | T                    | 0.0001064 |
| rs149580705 | 1          | 14154806 | A            | 29                                 | 8                                     | AGTAAACTTACCTGTTTCTG | 0.0001956 |
| rs2697983   | 1          | 14157577 | A            | 30                                 | 8                                     | G                    | 0.0001064 |
| rs195738    | 1          | 24806560 | C            | 41                                 | 17                                    | T                    | 0.0007198 |
| rs4649044   | 1          | 25342567 | C            | 5                                  | 21                                    | T                    | 0.0005184 |
| rs11802335  | 1          | 25344494 | C            | 5                                  | 23                                    | T                    | 0.0001426 |
| rs11588079  | 1          | 25367084 | G            | 22                                 | 43                                    | T                    | 0.0006167 |
| rs4649056   | 1          | 25371793 | A            | 21                                 | 41                                    | G                    | 0.0009669 |
| rs12753065  | 1          | 25374586 | G            | 21                                 | 41                                    | C                    | 0.0009669 |
| rs4649057   | 1          | 25375177 | C            | 28                                 | 50                                    | T                    | 0.0005077 |
| rs4649058   | 1          | 25375468 | A            | 29                                 | 50                                    | G                    | 0.0009027 |
| rs11248970  | 1          | 25375561 | G            | 29                                 | 50                                    | A                    | 0.0009027 |
| rs56127605  | 1          | 25381311 | A            | 33                                 | 55                                    | G                    | 0.0005652 |
| rs12075549  | 1          | 25381526 | C            | 51                                 | 27                                    | T                    | 0.0009437 |
| rs10437112  | 1          | 25384437 | G            | 49                                 | 24                                    | A                    | 0.0004678 |
| rs4649060   | 1          | 25384533 | T            | 50                                 | 24                                    | G                    | 0.0002688 |
| rs182642985 | 1          | 25385193 | G            | 51                                 | 24                                    | A                    | 0.0001515 |
| rs137983526 | 1          | 25385759 | A            | 50                                 | 24                                    | C                    | 0.0002688 |
| 1:33442122  | 1          | 33442122 | C            | 3                                  | 18                                    | CACACACACACA         | 0.0007476 |

|             |   |          |     |    |    |    |            |
|-------------|---|----------|-----|----|----|----|------------|
| rs143567912 | 1 | 34140788 | G   | 1  | 14 | T  | 0.0002433  |
| 1:34672864  | 1 | 34672864 | G   | 28 | 50 | GT | 0.0005077  |
| rs58814335  | 1 | 34672865 | G   | 26 | 48 | T  | 0.0004647  |
| rs3917937   | 1 | 36943141 | A   | 51 | 22 | G  | 0.00003821 |
| rs3917932   | 1 | 36943916 | C   | 54 | 26 | G  | 0.00009512 |
| rs4026505   | 1 | 36950775 | A   | 48 | 24 | T  | 0.0007984  |
| rs6667860   | 1 | 36958213 | C   | 57 | 32 | T  | 0.0006468  |
| rs2247886   | 1 | 38931754 | A   | 23 | 46 | C  | 0.0002182  |
| rs2235544   | 1 | 54375570 | C   | 33 | 55 | A  | 0.0005652  |
| rs61674130  | 1 | 54389774 | TAG | 33 | 55 | T  | 0.0005652  |
| rs12127960  | 1 | 54419526 | T   | 32 | 54 | A  | 0.0005601  |
| rs651381    | 1 | 54450998 | G   | 33 | 55 | A  | 0.0005652  |
| rs607776    | 1 | 54459574 | A   | 53 | 31 | C  | 0.0007953  |
| rs12036530  | 1 | 54476323 | C   | 32 | 53 | T  | 0.0009656  |
| rs41366847  | 1 | 54476967 | G   | 32 | 53 | C  | 0.0009656  |
| rs10158824  | 1 | 54480398 | C   | 33 | 54 | G  | 0.0009764  |
| rs1537321   | 1 | 54482236 | A   | 31 | 53 | C  | 0.0005517  |
| rs1537322   | 1 | 54482306 | T   | 31 | 53 | G  | 0.0005517  |
| rs1537323   | 1 | 54482523 | G   | 31 | 53 | T  | 0.0005517  |
| rs11804837  | 1 | 54482915 | A   | 31 | 53 | G  | 0.0005517  |
| rs7540270   | 1 | 54484682 | G   | 31 | 53 | A  | 0.0005517  |
| rs67676007  | 1 | 54485779 | A   | 30 | 52 | G  | 0.00054    |
| rs79534351  | 1 | 58501725 | G   | 2  | 15 | A  | 0.0006243  |
| rs34827621  | 1 | 68642064 | G   | 2  | 15 | A  | 0.0006243  |
| rs12568058  | 1 | 69987293 | G   | 30 | 10 | T  | 0.0006347  |
| rs7516464   | 1 | 71518153 | T   | 33 | 8  | A  | 0.00001568 |
| rs880098    | 1 | 71520103 | C   | 57 | 32 | T  | 0.0006468  |
| rs3765414   | 1 | 71520652 | T   | 18 | 2  | C  | 0.000203   |
| rs34797173  | 1 | 71521464 | CA  | 33 | 8  | C  | 0.00001568 |
| rs11365325  | 1 | 71521607 | CT  | 57 | 32 | C  | 0.0006468  |
| rs2817869   | 1 | 71522404 | C   | 49 | 22 | T  | 0.0001287  |
| rs60800640  | 1 | 71524239 | AC  | 50 | 24 | A  | 0.0002688  |
| rs4650099   | 1 | 71524310 | A   | 57 | 32 | G  | 0.0006468  |
| rs4128461   | 1 | 71526710 | T   | 57 | 32 | C  | 0.0006468  |
| rs4579709   | 1 | 71527491 | G   | 18 | 2  | A  | 0.000203   |
| rs4520371   | 1 | 71527548 | C   | 57 | 32 | T  | 0.0006468  |
| rs7411      | 1 | 71529401 | T   | 50 | 24 | C  | 0.0002688  |
| rs66461782  | 1 | 71533287 | T   | 33 | 9  | A  | 0.00004367 |
| rs1138177   | 1 | 71535608 | C   | 33 | 8  | T  | 0.00001568 |
| rs11209745  | 1 | 71537943 | G   | 33 | 8  | A  | 0.00001568 |

|             |   |          |        |    |    |      |             |
|-------------|---|----------|--------|----|----|------|-------------|
| rs9425055   | 1 | 71541003 | C      | 18 | 2  | T    | 0.000203    |
| rs4650100   | 1 | 71543877 | C      | 57 | 32 | A    | 0.0006468   |
| rs12035210  | 1 | 71545970 | A      | 33 | 8  | G    | 0.00001568  |
| rs7549846   | 1 | 71548122 | G      | 18 | 3  | C    | 0.0008121   |
| rs7519104   | 1 | 71548467 | G      | 33 | 9  | T    | 0.00003093  |
| rs58864545  | 1 | 71554002 | GCA    | 47 | 17 | G    | 0.00001055  |
| rs12044810  | 1 | 71554014 | G      | 18 | 3  | A    | 0.0008121   |
| rs12084460  | 1 | 71556842 | A      | 33 | 9  | G    | 0.00004367  |
| rs6680193   | 1 | 71556899 | G      | 50 | 24 | A    | 0.0002688   |
| rs7522835   | 1 | 71557241 | T      | 18 | 3  | C    | 0.0008121   |
| rs9424959   | 1 | 71558452 | G      | 18 | 3  | A    | 0.0008121   |
| rs4272572   | 1 | 71561084 | A      | 50 | 24 | G    | 0.0002688   |
| rs9783035   | 1 | 71562923 | C      | 18 | 3  | T    | 0.0008121   |
| rs4146736   | 1 | 71569333 | G      | 18 | 3  | A    | 0.0008121   |
| rs11209746  | 1 | 71572114 | G      | 50 | 24 | A    | 0.0002688   |
| rs56254112  | 1 | 71574825 | G      | 34 | 9  | C    | 0.00002308  |
| rs201695113 | 1 | 71575618 | C      | 18 | 3  | T    | 0.0008121   |
| rs9425057   | 1 | 71576970 | G      | 50 | 24 | A    | 0.0002688   |
| rs150907838 | 1 | 71577894 | T      | 18 | 3  | G    | 0.0008121   |
| rs5775050   | 1 | 71583630 | C      | 33 | 9  | CCTT | 0.00004367  |
| rs67335874  | 1 | 71584260 | ATATCT | 50 | 24 | A    | 0.0002688   |
| rs2817842   | 1 | 71585378 | C      | 50 | 24 | A    | 0.0002688   |
| rs9424960   | 1 | 71586388 | C      | 50 | 24 | T    | 0.0002688   |
| rs4390127   | 1 | 71586909 | A      | 50 | 24 | G    | 0.0002688   |
| rs2817845   | 1 | 71587698 | C      | 50 | 24 | G    | 0.0002688   |
| rs7537624   | 1 | 71588369 | A      | 50 | 24 | C    | 0.0002688   |
| rs9425060   | 1 | 71589384 | G      | 18 | 3  | A    | 0.0008121   |
| rs71095930  | 1 | 71590995 | T      | 33 | 6  | TC   | 0.000002815 |
| rs34717496  | 1 | 71591196 | TTC    | 50 | 24 | T    | 0.0002688   |
| rs2817847   | 1 | 71593676 | T      | 18 | 3  | G    | 0.0008121   |
| rs2817848   | 1 | 71595348 | G      | 33 | 9  | A    | 0.00004367  |
| rs4367753   | 1 | 71596192 | G      | 46 | 17 | T    | 0.00002027  |
| rs1578681   | 1 | 71598851 | A      | 50 | 24 | G    | 0.0002688   |
| rs12565508  | 1 | 71599507 | G      | 18 | 3  | A    | 0.0008121   |
| rs2796196   | 1 | 71599651 | T      | 50 | 24 | G    | 0.0002688   |
| rs2796197   | 1 | 71603644 | T      | 50 | 24 | C    | 0.0002688   |
| rs2817851   | 1 | 71603703 | A      | 50 | 24 | G    | 0.0002688   |
| rs5775051   | 1 | 71604136 | T      | 33 | 9  | TA   | 0.00004367  |
| rs2796198   | 1 | 71604867 | G      | 33 | 9  | A    | 0.00004367  |
| rs12144622  | 1 | 71605107 | C      | 50 | 24 | G    | 0.0002688   |

|             |   |                         |    |          |             |
|-------------|---|-------------------------|----|----------|-------------|
| rs2796199   | 1 | 71609102 C              | 33 | 9 T      | 0.00004367  |
| rs2817853   | 1 | 71614212 T              | 50 | 24 C     | 0.0002688   |
| rs10889909  | 1 | 71615678 T              | 50 | 24 C     | 0.0002688   |
| rs10465815  | 1 | 71615858 G              | 33 | 9 A      | 0.00004367  |
| rs6424420   | 1 | 71617388 C              | 18 | 3 A      | 0.0008121   |
| rs1832900   | 1 | 71619556 A              | 50 | 24 C     | 0.0002688   |
| rs1418449   | 1 | 71632687 T              | 46 | 17 G     | 0.00002027  |
| rs12747444  | 1 | 71634219 A              | 18 | 3 G      | 0.0008121   |
| rs4425938   | 1 | 71637113 T              | 46 | 17 C     | 0.00002027  |
| rs6424422   | 1 | 71642471 T              | 46 | 17 A     | 0.00002027  |
| rs59167530  | 1 | 71650947 A              | 31 | 10 AT    | 0.0003611   |
| rs113319318 | 1 | 71651728 A              | 31 | 10 ATCAC | 0.0003611   |
| rs74365843  | 1 | 71652676 T              | 47 | 16 C     | 0.000004496 |
| rs1417709   | 1 | 71656481 A              | 47 | 17 G     | 0.00001055  |
| rs1954286   | 1 | 71657212 A              | 51 | 24 G     | 0.0001515   |
| rs67184325  | 1 | 71658411 AT             | 47 | 18 A     | 0.00002365  |
| rs2639329   | 1 | 71660120 G              | 47 | 17 A     | 0.00001055  |
| rs2796201   | 1 | 71660796 C              | 47 | 17 T     | 0.00001055  |
| rs2796202   | 1 | 71662048 A              | 51 | 24 G     | 0.0001515   |
| rs1954285   | 1 | 71662977 T              | 47 | 16 A     | 0.000004496 |
| rs952337    | 1 | 71663414 T              | 47 | 16 A     | 0.000004496 |
| rs71095934  | 1 | 71664305 GGAGGCTGAGGCAA | 57 | 32 G     | 0.0006468   |
| rs2796203   | 1 | 71665671 T              | 47 | 16 C     | 0.000004496 |
| rs2066371   | 1 | 71667881 G              | 47 | 17 A     | 0.00001055  |
| rs1573061   | 1 | 71668906 C              | 47 | 17 T     | 0.00001055  |
| rs2639338   | 1 | 71672398 A              | 47 | 16 G     | 0.000004496 |
| rs2639339   | 1 | 71672677 G              | 47 | 16 C     | 0.000004496 |
| rs2639340   | 1 | 71673009 A              | 51 | 24 G     | 0.0001515   |
| rs12406316  | 1 | 71673738 T              | 47 | 16 C     | 0.000004496 |
| rs2639335   | 1 | 71676127 A              | 47 | 16 G     | 0.000004496 |
| rs2639336   | 1 | 71676720 A              | 31 | 10 C     | 0.0003611   |
| rs2639334   | 1 | 71677428 G              | 47 | 17 A     | 0.00001055  |
| rs2639333   | 1 | 71678935 G              | 51 | 25 A     | 0.0002873   |
| rs2639332   | 1 | 71679004 A              | 31 | 10 C     | 0.0003611   |
| rs7513433   | 1 | 71679679 T              | 18 | 3 C      | 0.0008121   |
| rs2249759   | 1 | 71681377 C              | 47 | 17 T     | 0.00001055  |
| rs375061957 | 1 | 71682194 C              | 51 | 25 G     | 0.0002873   |
| 1:71682226  | 1 | 71682226 G              | 51 | 25 A     | 0.0002873   |
| rs370402759 | 1 | 71683102 G              | 47 | 17 C     | 0.00001055  |
| rs138432234 | 1 | 71684405 C              | 57 | 32 T     | 0.0006468   |

|             |   |          |         |    |    |    |             |
|-------------|---|----------|---------|----|----|----|-------------|
| rs12759919  | 1 | 71685633 | T       | 47 | 16 | G  | 0.000004496 |
| rs200781733 | 1 | 71685857 | G       | 18 | 3  | A  | 0.0008121   |
| rs9726375   | 1 | 71686237 | C       | 47 | 16 | A  | 0.000004496 |
| rs11588351  | 1 | 71689021 | A       | 57 | 32 | G  | 0.0006468   |
| rs2796186   | 1 | 71692659 | A       | 51 | 24 | G  | 0.0001515   |
| rs11209753  | 1 | 71693046 | A       | 57 | 32 | G  | 0.0006468   |
| rs2796187   | 1 | 71693853 | A       | 51 | 25 | G  | 0.0002873   |
| rs2796188   | 1 | 71694861 | G       | 51 | 25 | A  | 0.0002873   |
| rs2796189   | 1 | 71694883 | C       | 51 | 25 | T  | 0.0002873   |
| rs2796190   | 1 | 71698274 | A       | 47 | 16 | G  | 0.000004496 |
| rs2639331   | 1 | 71698461 | T       | 47 | 16 | C  | 0.000004496 |
| rs2796192   | 1 | 71698946 | C       | 47 | 17 | G  | 0.00001055  |
| rs2639330   | 1 | 71699013 | T       | 47 | 16 | C  | 0.000004496 |
| rs34196037  | 1 | 71700130 | C       | 48 | 21 | T  | 0.0001169   |
| 1:71700132  | 1 | 71700132 | C       | 48 | 19 | T  | 0.00002719  |
| rs12119958  | 1 | 71703438 | A       | 57 | 32 | G  | 0.0006468   |
| rs2694955   | 1 | 71705104 | A       | 51 | 25 | T  | 0.0002873   |
| rs2694954   | 1 | 71705578 | G       | 51 | 25 | T  | 0.0002873   |
| rs1431503   | 1 | 71706106 | T       | 18 | 3  | C  | 0.0008121   |
| rs1431504   | 1 | 71712759 | G       | 31 | 11 | A  | 0.0008085   |
| rs2790675   | 1 | 71718838 | G       | 44 | 16 | A  | 0.00003243  |
| rs2790674   | 1 | 71719363 | C       | 44 | 15 | T  | 0.00001416  |
| rs1546809   | 1 | 71723278 | G       | 44 | 16 | T  | 0.00003243  |
| rs11209757  | 1 | 71728900 | G       | 48 | 23 | T  | 0.0004351   |
| rs7527741   | 1 | 71740325 | C       | 32 | 9  | A  | 0.00008145  |
| rs1367768   | 1 | 71745710 | A       | 33 | 9  | G  | 0.00004367  |
| rs35251740  | 1 | 71746844 | CT      | 21 | 4  | C  | 0.0001738   |
| rs7415084   | 1 | 71751307 | C       | 32 | 9  | T  | 0.00008145  |
| rs6658862   | 1 | 71752476 | G       | 32 | 10 | T  | 0.0002023   |
| rs7540435   | 1 | 71753041 | C       | 33 | 9  | T  | 0.00004367  |
| rs34086176  | 1 | 71753953 | C       | 35 | 10 | CA | 0.0000652   |
| rs6695355   | 1 | 71762203 | G       | 32 | 9  | A  | 0.00008145  |
| rs11209761  | 1 | 71764175 | T       | 48 | 24 | C  | 0.0007984   |
| rs12723074  | 1 | 81471586 | G       | 17 | 37 | T  | 0.0006349   |
| rs76879528  | 1 | 85234319 | A       | 24 | 6  | T  | 0.0005592   |
| 1:85234608  | 1 | 85234608 | GTGTGTA | 24 | 6  | G  | 0.0005592   |
| rs77512569  | 1 | 85235551 | A       | 24 | 6  | C  | 0.0005592   |
| rs74510508  | 1 | 85235837 | T       | 24 | 6  | C  | 0.0005592   |
| rs57189278  | 1 | 85235859 | A       | 24 | 6  | G  | 0.0005592   |
| rs77176056  | 1 | 85236425 | G       | 24 | 6  | C  | 0.0005592   |

|             |   |           |                       |    |    |   |           |
|-------------|---|-----------|-----------------------|----|----|---|-----------|
| rs17369401  | 1 | 85314611  | A                     | 23 | 4  | G | 0.0001119 |
| rs17369470  | 1 | 85318376  | A                     | 14 | 1  | G | 0.0006347 |
| rs17378045  | 1 | 85318907  | A                     | 23 | 4  | G | 0.0001119 |
| rs74364002  | 1 | 85328742  | T                     | 14 | 1  | C | 0.0006103 |
| rs368186205 | 1 | 85615108  | G                     | 28 | 8  | A | 0.0003134 |
| rs11165287  | 1 | 95498978  | T                     | 1  | 15 | C | 0.0001157 |
| rs116733964 | 1 | 99906088  | A                     | 11 | 0  | G | 0.0007274 |
| 1:142577113 | 1 | 142577113 | G                     | 21 | 4  | A | 0.0004069 |
| rs56801406  | 1 | 157044993 | G                     | 25 | 7  | C | 0.0008092 |
| rs59462822  | 1 | 157045213 | A                     | 25 | 7  | G | 0.0008092 |
| rs35188764  | 1 | 157046198 | G                     | 22 | 5  | A | 0.0006676 |
| rs11587380  | 1 | 157048220 | G                     | 25 | 7  | C | 0.0008092 |
| rs11578226  | 1 | 157051348 | C                     | 25 | 7  | T | 0.0008092 |
| rs149171885 | 1 | 157052071 | TCAGTTTGGCATTTTAAACA( | 25 | 7  | T | 0.0008092 |
| rs34414479  | 1 | 157052224 | A                     | 25 | 7  | G | 0.0008092 |
| rs1176561   | 1 | 157053342 | T                     | 22 | 5  | C | 0.0006676 |
| rs12136960  | 1 | 157062739 | G                     | 30 | 9  | C | 0.0002709 |
| rs76614224  | 1 | 157453597 | G                     | 11 | 30 | C | 0.0006171 |
| rs12120811  | 1 | 157454010 | G                     | 18 | 39 | A | 0.0004141 |
| rs10918046  | 1 | 164526190 | G                     | 16 | 1  | A | 0.0001529 |
| rs7549447   | 1 | 165288621 | A                     | 48 | 24 | T | 0.0007984 |
| rs6688855   | 1 | 165291536 | G                     | 48 | 24 | T | 0.0007984 |
| rs12564138  | 1 | 165292079 | G                     | 48 | 24 | C | 0.0007984 |
| rs4656444   | 1 | 165293947 | T                     | 48 | 24 | C | 0.0007984 |
| rs1504702   | 1 | 165294398 | C                     | 48 | 24 | T | 0.0007984 |
| rs1504703   | 1 | 165294528 | C                     | 48 | 24 | G | 0.0007984 |
| rs2553640   | 1 | 165466877 | A                     | 3  | 17 | G | 0.0006426 |
| rs285498    | 1 | 165467808 | A                     | 3  | 17 | C | 0.0006426 |
| rs2766085   | 1 | 165471470 | G                     | 2  | 17 | A | 0.0001534 |
| rs374659495 | 1 | 168545583 | G                     | 2  | 16 | A | 0.0003115 |
| rs367943926 | 1 | 168545584 | T                     | 2  | 16 | C | 0.0003115 |
| rs3917734   | 1 | 169580463 | A                     | 12 | 33 | G | 0.0002456 |
| rs3917733   | 1 | 169580510 | T                     | 12 | 33 | C | 0.0002456 |
| rs3917731   | 1 | 169580717 | C                     | 12 | 33 | T | 0.0002456 |
| rs3917710   | 1 | 169584521 | C                     | 12 | 33 | T | 0.0002456 |
| rs3917690   | 1 | 169590911 | C                     | 12 | 33 | T | 0.0002456 |
| rs3917687   | 1 | 169591093 | G                     | 12 | 33 | A | 0.0002456 |
| rs3917678   | 1 | 169591895 | A                     | 12 | 33 | C | 0.0002456 |
| rs17523783  | 1 | 169602241 | T                     | 12 | 33 | G | 0.0002456 |
| rs72712029  | 1 | 169606412 | T                     | 12 | 33 | C | 0.0002456 |

|             |   |           |   |    |    |         |            |
|-------------|---|-----------|---|----|----|---------|------------|
| rs72712030  | 1 | 169606590 | A | 12 | 33 | C       | 0.0002456  |
| rs369654643 | 1 | 169610477 | A | 12 | 33 | ATATAAG | 0.0002456  |
| rs17589589  | 1 | 169610886 | G | 12 | 33 | A       | 0.0002456  |
| rs17589700  | 1 | 169614949 | A | 12 | 33 | G       | 0.0002456  |
| rs531650    | 1 | 170657994 | C | 16 | 37 | T       | 0.0003171  |
| rs7884276   | 1 | 171132644 | C | 11 | 0  | G       | 0.0007274  |
| rs74970368  | 1 | 171134688 | C | 11 | 0  | G       | 0.0007274  |
| rs7887919   | 1 | 171137772 | A | 11 | 0  | C       | 0.0007274  |
| rs74122249  | 1 | 171138389 | C | 11 | 0  | T       | 0.0007274  |
| rs76506870  | 1 | 171138483 | A | 11 | 0  | G       | 0.0007274  |
| rs79631707  | 1 | 171141237 | T | 11 | 0  | C       | 0.0007274  |
| rs77720244  | 1 | 171146081 | C | 11 | 0  | T       | 0.0007274  |
| rs79906093  | 1 | 171148864 | A | 11 | 0  | T       | 0.0007274  |
| rs75643254  | 1 | 171149489 | T | 11 | 0  | C       | 0.0007274  |
| rs6677549   | 1 | 171150840 | C | 11 | 0  | T       | 0.0007274  |
| rs6700357   | 1 | 171151193 | T | 11 | 0  | G       | 0.0007086  |
| rs28369789  | 1 | 171153577 | G | 11 | 0  | A       | 0.0007274  |
| rs76414019  | 1 | 171154643 | A | 11 | 0  | AG      | 0.0007274  |
| rs2020870   | 1 | 171154959 | G | 11 | 0  | A       | 0.0007274  |
| rs28369802  | 1 | 171156034 | C | 11 | 0  | T       | 0.0007274  |
| rs28369803  | 1 | 171156100 | G | 11 | 0  | A       | 0.0007274  |
| rs28369818  | 1 | 171158008 | A | 11 | 0  | T       | 0.0007274  |
| rs7526747   | 1 | 175071061 | G | 10 | 29 | A       | 0.0002108  |
| rs7526749   | 1 | 175071068 | T | 10 | 29 | A       | 0.0002108  |
| rs12088035  | 1 | 175071568 | T | 11 | 29 | C       | 0.0004994  |
| rs6678745   | 1 | 175072628 | C | 11 | 29 | A       | 0.0004994  |
| rs11584067  | 1 | 175075286 | C | 11 | 29 | T       | 0.0004994  |
| rs7552526   | 1 | 175075759 | T | 11 | 29 | G       | 0.0004994  |
| rs7552543   | 1 | 175075826 | A | 11 | 29 | G       | 0.0004994  |
| rs78664997  | 1 | 175165977 | T | 0  | 10 | C       | 0.0005917  |
| rs4549996   | 1 | 186707043 | C | 7  | 28 | G       | 0.00005252 |
| rs9442053   | 1 | 188643703 | A | 22 | 5  | G       | 0.0006676  |
| rs4650772   | 1 | 188649529 | C | 22 | 5  | T       | 0.0006676  |
| rs1902894   | 1 | 188650432 | T | 22 | 5  | A       | 0.0006676  |
| rs1902890   | 1 | 188650940 | A | 22 | 5  | C       | 0.0006676  |
| rs1902889   | 1 | 188651089 | A | 22 | 5  | G       | 0.0006676  |
| rs4651477   | 1 | 188651853 | T | 22 | 5  | C       | 0.0006676  |
| rs28659919  | 1 | 188652869 | A | 22 | 5  | G       | 0.0006676  |
| rs28882399  | 1 | 188655501 | A | 22 | 5  | C       | 0.0006676  |
| rs28407051  | 1 | 188657486 | A | 22 | 5  | G       | 0.0006676  |

|            |   |           |     |    |   |        |           |
|------------|---|-----------|-----|----|---|--------|-----------|
| rs1870284  | 1 | 188658760 | A   | 22 | 5 | C      | 0.0006676 |
| rs61832752 | 1 | 188659299 | G   | 22 | 5 | A      | 0.0006676 |
| rs28716667 | 1 | 188659554 | C   | 28 | 7 | T      | 0.0001348 |
| rs28470533 | 1 | 188663320 | C   | 22 | 5 | T      | 0.0006676 |
| rs4628463  | 1 | 188663907 | T   | 22 | 5 | C      | 0.0006676 |
| rs1902895  | 1 | 188664093 | A   | 22 | 5 | G      | 0.0006676 |
| rs2125282  | 1 | 188664538 | T   | 22 | 5 | C      | 0.0006676 |
| rs3076948  | 1 | 188664700 | C   | 22 | 5 | CTTTGA | 0.0006676 |
| rs2125283  | 1 | 188664796 | A   | 22 | 5 | C      | 0.0006676 |
| rs12125711 | 1 | 188665560 | G   | 22 | 5 | C      | 0.0006676 |
| rs7539954  | 1 | 188665816 | C   | 22 | 5 | A      | 0.0006676 |
| rs28819458 | 1 | 188666185 | G   | 22 | 5 | T      | 0.0006676 |
| rs7550119  | 1 | 188666925 | T   | 22 | 5 | C      | 0.0006676 |
| rs7545804  | 1 | 188667358 | C   | 22 | 5 | T      | 0.0006676 |
| rs4412594  | 1 | 188667533 | G   | 22 | 5 | A      | 0.0006676 |
| rs76858875 | 1 | 188667613 | T   | 20 | 4 | G      | 0.0007481 |
| rs2312277  | 1 | 188668304 | T   | 22 | 5 | C      | 0.0006676 |
| rs2312278  | 1 | 188668379 | C   | 22 | 5 | T      | 0.0006676 |
| rs1902877  | 1 | 188668620 | A   | 22 | 5 | C      | 0.0006676 |
| rs1902876  | 1 | 188668668 | T   | 22 | 5 | C      | 0.0006676 |
| rs10801018 | 1 | 188669367 | A   | 22 | 5 | T      | 0.0006676 |
| rs10801020 | 1 | 188669435 | T   | 22 | 5 | G      | 0.0006676 |
| rs7514277  | 1 | 188669462 | T   | 22 | 5 | C      | 0.0006676 |
| rs4575089  | 1 | 188669624 | T   | 22 | 5 | C      | 0.0006676 |
| rs4459111  | 1 | 188669689 | C   | 22 | 5 | T      | 0.0006676 |
| rs4639766  | 1 | 188669859 | T   | 22 | 5 | A      | 0.0006676 |
| rs61270430 | 1 | 188670298 | CTT | 22 | 5 | C      | 0.0006676 |
| rs28879483 | 1 | 188670518 | T   | 22 | 5 | C      | 0.0006676 |
| rs28729428 | 1 | 188670708 | A   | 22 | 5 | G      | 0.0006676 |
| rs12131857 | 1 | 188671055 | G   | 22 | 5 | C      | 0.0006676 |
| rs12119328 | 1 | 188671215 | C   | 22 | 5 | T      | 0.0006676 |
| rs10920924 | 1 | 188671252 | A   | 22 | 5 | G      | 0.0006676 |
| rs7533774  | 1 | 188671315 | G   | 22 | 5 | C      | 0.0006676 |
| rs7533904  | 1 | 188671432 | G   | 22 | 5 | T      | 0.0006676 |
| rs7533919  | 1 | 188671462 | G   | 22 | 5 | A      | 0.0006676 |
| rs34304001 | 1 | 188671467 | A   | 22 | 5 | G      | 0.0006676 |
| rs7526057  | 1 | 188671469 | A   | 22 | 5 | C      | 0.0006676 |
| rs7513673  | 1 | 188671524 | C   | 22 | 5 | T      | 0.0006676 |
| rs6428054  | 1 | 188671656 | A   | 22 | 5 | T      | 0.0006676 |
| rs6428055  | 1 | 188671850 | A   | 22 | 5 | G      | 0.0006676 |



|             |   |           |       |    |    |      |           |
|-------------|---|-----------|-------|----|----|------|-----------|
| rs6428056   | 1 | 188672106 | T     | 22 | 5  | A    | 0.0006676 |
| rs4397657   | 1 | 188672537 | G     | 22 | 5  | A    | 0.0006676 |
| rs4480360   | 1 | 188672581 | G     | 22 | 5  | C    | 0.0006676 |
| rs4483411   | 1 | 188672658 | G     | 22 | 5  | A    | 0.0006676 |
| rs4651480   | 1 | 188672838 | C     | 22 | 5  | T    | 0.0006676 |
| rs4651481   | 1 | 188672913 | T     | 22 | 5  | C    | 0.0006676 |
| rs28853365  | 1 | 188673023 | G     | 22 | 5  | A    | 0.0006676 |
| rs4651482   | 1 | 188673359 | T     | 22 | 5  | C    | 0.0006676 |
| rs28884294  | 1 | 188673361 | T     | 22 | 5  | C    | 0.0006676 |
| rs2100666   | 1 | 188673445 | C     | 22 | 5  | G    | 0.0006676 |
| rs2100667   | 1 | 188673494 | G     | 22 | 5  | A    | 0.0006676 |
| rs4434839   | 1 | 188673548 | A     | 22 | 5  | G    | 0.0006676 |
| rs4650773   | 1 | 188674062 | T     | 22 | 5  | G    | 0.0006676 |
| rs4650774   | 1 | 188674113 | G     | 22 | 5  | A    | 0.0006676 |
| rs4247158   | 1 | 188674188 | T     | 22 | 5  | C    | 0.0006676 |
| rs28801114  | 1 | 188674205 | G     | 22 | 5  | T    | 0.0006676 |
| rs4650775   | 1 | 188674220 | T     | 22 | 5  | A    | 0.0006676 |
| rs6668661   | 1 | 188674687 | C     | 22 | 5  | A    | 0.0006676 |
| rs57037772  | 1 | 188674715 | GAAAA | 22 | 5  | G    | 0.0007368 |
| rs4481852   | 1 | 188674740 | C     | 22 | 5  | A    | 0.0006676 |
| rs4492623   | 1 | 188675005 | G     | 22 | 5  | A    | 0.0006676 |
| rs4456095   | 1 | 188675152 | C     | 22 | 5  | T    | 0.0006676 |
| rs7554587   | 1 | 188675544 | C     | 22 | 5  | A    | 0.0006676 |
| rs4638130   | 1 | 188676018 | T     | 22 | 5  | G    | 0.0006676 |
| rs370377948 | 1 | 188676257 | A     | 22 | 5  | ATTT | 0.0006676 |
| rs12120770  | 1 | 188676306 | A     | 22 | 5  | G    | 0.0006676 |
| rs10921023  | 1 | 188676369 | A     | 22 | 5  | G    | 0.0006676 |
| rs10921026  | 1 | 188676538 | A     | 22 | 5  | C    | 0.0006676 |
| rs10921033  | 1 | 188676735 | G     | 22 | 5  | T    | 0.0006676 |
| rs12123567  | 1 | 188676897 | A     | 22 | 5  | G    | 0.0006676 |
| rs12120953  | 1 | 188676908 | A     | 22 | 5  | G    | 0.0006676 |
| rs10921037  | 1 | 188676938 | C     | 22 | 5  | G    | 0.0006676 |
| rs4474247   | 1 | 188677169 | C     | 22 | 5  | T    | 0.0006676 |
| rs4396125   | 1 | 188677486 | A     | 22 | 5  | G    | 0.0006676 |
| rs10921058  | 1 | 188678525 | A     | 22 | 5  | C    | 0.0006676 |
| rs34085431  | 1 | 188679244 | C     | 22 | 5  | T    | 0.0006676 |
| rs10801134  | 1 | 188684394 | A     | 28 | 8  | G    | 0.0003544 |
| rs12028712  | 1 | 188686273 | G     | 28 | 8  | T    | 0.0003544 |
| rs10436899  | 1 | 188693998 | T     | 28 | 8  | A    | 0.0003544 |
| rs11801703  | 1 | 189825109 | T     | 16 | 35 | C    | 0.000956  |

|             |                |    |                         |            |
|-------------|----------------|----|-------------------------|------------|
| 1:198804284 | 1 198804284 A  | 15 | 38 AG                   | 0.00007582 |
| 1:198804286 | 1 198804286 A  | 15 | 39 G                    | 0.00004037 |
| 1:198804287 | 1 198804287 A  | 15 | 38 AAGGAAGGAAGGAAGGAAGG | 0.00007582 |
| rs12049427  | 1 199580285 G  | 27 | 8 A                     | 0.0006326  |
| rs113906106 | 1 200670819 T  | 11 | 0 C                     | 0.0007274  |
| rs2281845   | 1 201081943 T  | 47 | 22 C                    | 0.0004013  |
| rs3738262   | 1 201083343 G  | 47 | 23 A                    | 0.0007443  |
| rs3738263   | 1 201083506 G  | 47 | 23 A                    | 0.0007443  |
| rs7516023   | 1 201085521 T  | 47 | 23 C                    | 0.0007443  |
| rs6413915   | 1 201091041 A  | 45 | 20 C                    | 0.000332   |
| rs6704363   | 1 201096383 G  | 45 | 20 A                    | 0.000332   |
| rs7549337   | 1 201097609 G  | 45 | 19 T                    | 0.0001682  |
| rs200517518 | 1 201100129 A  | 41 | 17 AT                   | 0.0004047  |
| rs200108640 | 1 201100133 A  | 41 | 17 T                    | 0.0004047  |
| rs831762    | 1 201153168 T  | 3  | 17 G                    | 0.0006426  |
| rs61136828  | 1 202167795 G  | 23 | 5 GGTTTTTTTTTTT         | 0.0004042  |
| rs12033091  | 1 202563966 T  | 12 | 0 C                     | 0.0003422  |
| rs12033827  | 1 202564040 A  | 12 | 0 C                     | 0.0003422  |
| rs375004536 | 1 202565747 A  | 12 | 0 AAAAC                 | 0.0003422  |
| rs629227    | 1 202570360 G  | 12 | 0 C                     | 0.0003422  |
| rs10800842  | 1 202570776 A  | 12 | 0 G                     | 0.0003422  |
| rs12037647  | 1 202573406 T  | 11 | 0 C                     | 0.0007274  |
| rs199940288 | 1 203750337 A  | 13 | 0 AAAG                  | 0.0001796  |
| rs34618698  | 1 204056948 A  | 18 | 3 G                     | 0.0008121  |
| rs10900600  | 1 204559707 G  | 14 | 33 T                    | 0.0007122  |
| rs10900601  | 1 204572050 A  | 13 | 32 G                    | 0.0009401  |
| rs4951082   | 1 204575807 A  | 56 | 31 G                    | 0.0006352  |
| rs898387    | 1 204579373 G  | 13 | 32 A                    | 0.0009401  |
| rs898386    | 1 204579697 A  | 13 | 32 G                    | 0.0009401  |
| rs4951083   | 1 204582730 A  | 13 | 32 G                    | 0.0009401  |
| rs884108    | 1 204591237 A  | 7  | 25 G                    | 0.0003419  |
| rs7551222   | 1 204599295 G  | 14 | 33 A                    | 0.0007122  |
| rs7553683   | 1 204599461 G  | 14 | 33 A                    | 0.0007122  |
| rs12024827  | 1 204607874 T  | 24 | 45 C                    | 0.0007128  |
| rs4951085   | 1 204608284 C  | 24 | 45 G                    | 0.0007128  |
| rs60168297  | 1 204608585 AC | 20 | 40 A                    | 0.0008835  |
| rs4951086   | 1 204608643 T  | 17 | 40 C                    | 0.0001139  |
| rs4951087   | 1 204609194 A  | 24 | 45 G                    | 0.0007128  |
| rs4950954   | 1 204610475 G  | 24 | 45 A                    | 0.0007128  |
| rs4951088   | 1 204610780 T  | 24 | 45 C                    | 0.0007128  |

|             |   |           |    |    |    |            |            |
|-------------|---|-----------|----|----|----|------------|------------|
| rs4951089   | 1 | 204610898 | T  | 24 | 45 | C          | 0.0007128  |
| rs138881554 | 1 | 204611658 | C  | 24 | 45 | CAAGGGAGGG | 0.0007128  |
| rs11240234  | 1 | 204612138 | T  | 24 | 45 | C          | 0.0007128  |
| rs11240235  | 1 | 204612200 | T  | 24 | 45 | C          | 0.0007128  |
| rs11240236  | 1 | 204612463 | T  | 24 | 45 | G          | 0.0007128  |
| rs11240237  | 1 | 204612518 | A  | 24 | 45 | G          | 0.0007128  |
| rs11240238  | 1 | 204612537 | T  | 24 | 45 | C          | 0.0007128  |
| rs11240239  | 1 | 204612804 | A  | 24 | 45 | G          | 0.0007128  |
| rs4279904   | 1 | 204613764 | A  | 18 | 43 | G          | 0.00003832 |
| rs10900418  | 1 | 204614166 | T  | 18 | 43 | C          | 0.00003832 |
| rs2772227   | 1 | 204615400 | T  | 16 | 39 | A          | 0.00009784 |
| rs1329631   | 1 | 204616390 | G  | 21 | 43 | A          | 0.0003256  |
| rs2815832   | 1 | 204617240 | A  | 19 | 40 | G          | 0.0004646  |
| rs12127178  | 1 | 204620354 | A  | 24 | 45 | G          | 0.0007128  |
| rs2772244   | 1 | 204621178 | G  | 17 | 42 | A          | 0.00003305 |
| rs2492985   | 1 | 204621247 | A  | 18 | 42 | G          | 0.00007147 |
| rs2480468   | 1 | 204621329 | A  | 21 | 42 | G          | 0.0005665  |
| rs2480467   | 1 | 204624957 | A  | 20 | 41 | G          | 0.0005156  |
| rs2451696   | 1 | 210282346 | T  | 35 | 13 | G          | 0.0006539  |
| rs2451697   | 1 | 210284025 | G  | 35 | 13 | A          | 0.0006539  |
| rs2484033   | 1 | 210287837 | A  | 35 | 13 | G          | 0.0006539  |
| rs2484030   | 1 | 210296910 | G  | 35 | 13 | T          | 0.0006539  |
| rs2484031   | 1 | 210303614 | C  | 35 | 13 | A          | 0.0006539  |
| rs61848993  | 1 | 211095666 | T  | 45 | 20 | C          | 0.000305   |
| rs150857619 | 1 | 212141784 | A  | 0  | 10 | C          | 0.0005917  |
| rs139943545 | 1 | 212197700 | G  | 0  | 10 | T          | 0.0005917  |
| rs200877944 | 1 | 212813000 | A  | 53 | 27 | G          | 0.0005244  |
| rs1933642   | 1 | 218355332 | T  | 22 | 5  | A          | 0.0006676  |
| rs12067336  | 1 | 218357940 | T  | 22 | 5  | C          | 0.0006676  |
| rs12116939  | 1 | 218362082 | C  | 22 | 5  | T          | 0.0006676  |
| rs57080194  | 1 | 218368208 | A  | 22 | 5  | G          | 0.0006676  |
| rs59489398  | 1 | 218368361 | T  | 22 | 5  | C          | 0.0006676  |
| rs1890357   | 1 | 218369926 | T  | 25 | 6  | A          | 0.0003059  |
| rs12118865  | 1 | 218370252 | T  | 22 | 5  | A          | 0.0006676  |
| rs4846265   | 1 | 218372593 | T  | 22 | 5  | C          | 0.0006676  |
| rs146197820 | 1 | 220565631 | TC | 46 | 21 | T          | 0.0003668  |
| 1:223087095 | 1 | 223087095 | G  | 0  | 10 | A          | 0.0005126  |
| rs56403019  | 1 | 224762915 | A  | 7  | 24 | G          | 0.0006277  |
| rs200807437 | 1 | 224773179 | CT | 6  | 22 | C          | 0.0007426  |
| rs904506    | 1 | 224779653 | C  | 7  | 24 | T          | 0.0006277  |

|             |   |           |   |    |    |                          |            |
|-------------|---|-----------|---|----|----|--------------------------|------------|
| rs6698799   | 1 | 224806555 | G | 7  | 24 | A                        | 0.0006277  |
| rs880496    | 1 | 224808134 | T | 7  | 24 | G                        | 0.0006277  |
| rs6672413   | 1 | 224817129 | C | 7  | 25 | T                        | 0.0003419  |
| rs6672806   | 1 | 224817506 | A | 7  | 25 | T                        | 0.0003419  |
| rs56039603  | 1 | 224818840 | A | 8  | 26 | G                        | 0.0004835  |
| rs58715712  | 1 | 224834621 | G | 4  | 21 | A                        | 0.0001601  |
| rs59962884  | 1 | 224835339 | A | 4  | 21 | G                        | 0.0001601  |
| rs17513562  | 1 | 224835372 | C | 4  | 21 | T                        | 0.0001601  |
| 1:228614740 | 1 | 228614740 | C | 44 | 21 | CT                       | 0.0005409  |
| 1:228614744 | 1 | 228614744 | C | 44 | 21 | CTCCTTCCCTCCCTTCCTTTCTCC | 0.0005409  |
| rs34776739  | 1 | 232637687 | C | 37 | 15 | CT                       | 0.0009053  |
| rs6674092   | 1 | 232638409 | A | 37 | 15 | G                        | 0.0009053  |
| rs6694142   | 1 | 232638547 | C | 37 | 15 | T                        | 0.0009053  |
| rs6676856   | 1 | 232638674 | A | 37 | 15 | G                        | 0.0009053  |
| rs6686543   | 1 | 232638703 | T | 37 | 15 | C                        | 0.0009053  |
| rs720806    | 1 | 232639262 | A | 37 | 15 | T                        | 0.0009053  |
| rs6659527   | 1 | 234503848 | G | 29 | 50 | A                        | 0.0009027  |
| rs12568273  | 1 | 234506616 | G | 18 | 41 | A                        | 0.0001308  |
| rs45577939  | 1 | 234509865 | G | 25 | 48 | T                        | 0.000423   |
| rs4300255   | 1 | 234510262 | G | 26 | 47 | A                        | 0.0007993  |
| rs6586385   | 1 | 234511213 | C | 28 | 50 | G                        | 0.0005077  |
| rs7554965   | 1 | 234511541 | A | 18 | 43 | G                        | 0.00003832 |
| rs11285466  | 1 | 234512010 | T | 18 | 43 | TC                       | 0.00003832 |
| rs6671513   | 1 | 234512169 | G | 18 | 43 | A                        | 0.00003832 |
| rs10429821  | 1 | 234512471 | C | 28 | 49 | T                        | 0.0008723  |
| rs10429822  | 1 | 234512519 | C | 28 | 50 | T                        | 0.0005077  |
| rs10429823  | 1 | 234512583 | C | 18 | 43 | T                        | 0.00003832 |
| rs10429824  | 1 | 234512593 | T | 28 | 50 | A                        | 0.0005077  |
| rs7513305   | 1 | 234512685 | C | 28 | 50 | G                        | 0.0005077  |
| rs10752783  | 1 | 234513512 | G | 28 | 50 | C                        | 0.0005077  |
| rs10752784  | 1 | 234513707 | G | 28 | 50 | A                        | 0.0005077  |
| rs2752      | 1 | 234513871 | A | 28 | 50 | C                        | 0.0005077  |
| rs6681436   | 1 | 234514025 | C | 18 | 43 | T                        | 0.00003832 |
| rs6664462   | 1 | 234514485 | T | 18 | 43 | G                        | 0.00003832 |
| rs10797537  | 1 | 234514613 | T | 15 | 41 | G                        | 0.0000218  |
| rs10797538  | 1 | 234514672 | A | 15 | 39 | G                        | 0.00001565 |
| rs12024011  | 1 | 234514725 | A | 15 | 39 | G                        | 0.00003647 |
| rs6681034   | 1 | 234515135 | A | 28 | 50 | G                        | 0.0005077  |
| rs55884696  | 1 | 234515265 | T | 18 | 43 | C                        | 0.00003832 |
| rs6684927   | 1 | 234516617 | A | 18 | 43 | G                        | 0.00003832 |

|             |   |                   |    |       |             |
|-------------|---|-------------------|----|-------|-------------|
| rs4477318   | 1 | 234517227 T       | 18 | 43 A  | 0.00003832  |
| rs12401853  | 1 | 234517474 C       | 18 | 44 A  | 0.00002016  |
| rs10910423  | 1 | 234517594 G       | 28 | 50 A  | 0.0005077   |
| rs149002825 | 1 | 234518776 AGAGAAG | 12 | 40 A  | 0.000001142 |
| rs10797539  | 1 | 234519385 C       | 18 | 43 T  | 0.00003832  |
| rs60111174  | 1 | 234520784 ACTT    | 18 | 43 A  | 0.00003832  |
| rs10910424  | 1 | 234521024 T       | 18 | 43 C  | 0.00003832  |
| rs10910425  | 1 | 234521118 C       | 18 | 43 T  | 0.00003832  |
| rs10752785  | 1 | 234521718 T       | 25 | 47 G  | 0.0004398   |
| rs7527165   | 1 | 234524045 T       | 18 | 43 C  | 0.00003832  |
| rs12023971  | 1 | 234525333 A       | 18 | 43 G  | 0.00003832  |
| rs6669190   | 1 | 234525940 C       | 30 | 56 T  | 0.00004926  |
| rs12402835  | 1 | 234526732 C       | 18 | 43 G  | 0.00003832  |
| rs7524822   | 1 | 234526868 T       | 54 | 29 C  | 0.0006016   |
| rs3862040   | 1 | 234527575 T       | 28 | 52 C  | 0.0001612   |
| rs3754318   | 1 | 234527992 A       | 54 | 29 G  | 0.0006016   |
| rs3754317   | 1 | 234528006 A       | 54 | 29 G  | 0.0006016   |
| rs7523423   | 1 | 234528373 T       | 28 | 52 C  | 0.0001612   |
| rs2175594   | 1 | 234529552 T       | 27 | 53 C  | 0.00004506  |
| rs2175593   | 1 | 234529570 A       | 27 | 52 G  | 0.00008446  |
| rs10910426  | 1 | 234530325 G       | 28 | 52 A  | 0.0001612   |
| rs10797540  | 1 | 234530370 A       | 28 | 52 G  | 0.0001612   |
| rs4027040   | 1 | 234531009 A       | 54 | 29 G  | 0.0006016   |
| rs61825875  | 1 | 234538524 C       | 10 | 28 G  | 0.000853    |
| rs10910427  | 1 | 234539157 T       | 25 | 54 C  | 0.000005411 |
| rs3768288   | 1 | 234540547 T       | 52 | 27 C  | 0.0005555   |
| rs1141264   | 1 | 234546245 T       | 25 | 47 C  | 0.0004398   |
| rs56945246  | 1 | 234729204 C       | 3  | 18 T  | 0.0003291   |
| rs72767248  | 1 | 234729970 G       | 3  | 18 T  | 0.0003291   |
| rs56056213  | 1 | 234730150 T       | 3  | 17 C  | 0.0006426   |
| rs72749953  | 1 | 234732072 T       | 3  | 18 C  | 0.0003291   |
| rs72749954  | 1 | 234732892 C       | 3  | 18 A  | 0.0003291   |
| rs72749956  | 1 | 234733215 G       | 3  | 18 A  | 0.0003291   |
| rs72749957  | 1 | 234733397 G       | 3  | 18 A  | 0.0003291   |
| rs147711727 | 1 | 234735006 GC      | 3  | 18 G  | 0.0003291   |
| 1:234746921 | 1 | 234746921 C       | 5  | 21 G  | 0.0005184   |
| rs5782030   | 1 | 238568643 T       | 43 | 20 TA | 0.0004933   |
| rs12074023  | 1 | 240631508 A       | 0  | 12 G  | 0.0001421   |
| 1:248659099 | 1 | 248659099 T       | 1  | 13 C  | 0.0004468   |
| rs77038252  | 2 | 1579459 C         | 15 | 1 A   | 0.0003131   |

|             |   |               |    |         |            |
|-------------|---|---------------|----|---------|------------|
| rs10929629  | 2 | 5666520 C     | 20 | 4 T     | 0.0007606  |
| rs41439744  | 2 | 5669317 G     | 20 | 4 T     | 0.0007606  |
| rs2882275   | 2 | 5689487 T     | 19 | 41 C    | 0.0002649  |
| rs1561208   | 2 | 5689697 A     | 19 | 41 G    | 0.0002649  |
| rs13397969  | 2 | 5692633 A     | 19 | 41 G    | 0.0002649  |
| rs112423392 | 2 | 5694887 A     | 16 | 2 AC    | 0.0007845  |
| rs1622254   | 2 | 7130521 G     | 2  | 16 A    | 0.0003502  |
| rs59730520  | 2 | 8739217 T     | 1  | 16 TATG | 0.00005445 |
| rs72784647  | 2 | 8745931 T     | 1  | 16 C    | 0.00005445 |
| rs66932920  | 2 | 8747957 C     | 1  | 16 T    | 0.00005445 |
| rs201252070 | 2 | 8748478 A     | 1  | 13 AC   | 0.0003973  |
| rs10803714  | 2 | 10163328 T    | 42 | 19 C    | 0.0008809  |
| rs62113307  | 2 | 11886952 C    | 2  | 15 G    | 0.0006952  |
| rs80119710  | 2 | 13181358 A    | 20 | 4 G     | 0.0007606  |
| rs112051872 | 2 | 13186061 C    | 20 | 4 A     | 0.0007606  |
| rs12477177  | 2 | 13209268 T    | 20 | 4 C     | 0.0007606  |
| rs76680758  | 2 | 13224171 T    | 20 | 4 C     | 0.0007606  |
| rs72771713  | 2 | 13487530 G    | 3  | 19 C    | 0.0001662  |
| rs66615117  | 2 | 14398590 T    | 0  | 10 G    | 0.0005917  |
| rs10715429  | 2 | 15843396 A    | 28 | 9 G     | 0.0008484  |
| rs7566672   | 2 | 15843584 T    | 28 | 9 A     | 0.0008484  |
| rs58206246  | 2 | 15847021 TA   | 29 | 9 T     | 0.0004831  |
| rs58982282  | 2 | 21239855 CAAA | 3  | 18 C    | 0.0003675  |
| rs2593484   | 2 | 30943137 T    | 54 | 29 C    | 0.0006016  |
| rs13385162  | 2 | 31724929 T    | 19 | 39 C    | 0.0007998  |
| rs11684698  | 2 | 31727524 A    | 18 | 39 T    | 0.0004141  |
| rs4952218   | 2 | 31731120 A    | 19 | 39 T    | 0.0007998  |
| rs6543630   | 2 | 31740034 A    | 17 | 38 G    | 0.0003648  |
| rs4952197   | 2 | 31767131 A    | 16 | 35 G    | 0.000956   |
| rs58811103  | 2 | 31801180 G    | 19 | 40 C    | 0.0004646  |
| rs2754530   | 2 | 31803403 T    | 19 | 41 C    | 0.0002649  |
| rs2268799   | 2 | 31803495 T    | 19 | 41 C    | 0.0002649  |
| rs522638    | 2 | 31805675 A    | 19 | 39 G    | 0.0007998  |
| rs632148    | 2 | 31806031 C    | 19 | 39 G    | 0.0007998  |
| rs806645    | 2 | 31807940 T    | 19 | 41 C    | 0.0002649  |
| rs11403363  | 2 | 31807998 A    | 19 | 40 AT   | 0.0004646  |
| rs676033    | 2 | 31808970 T    | 19 | 39 C    | 0.0007998  |
| rs502139    | 2 | 31811268 T    | 19 | 40 C    | 0.0004646  |
| rs599300    | 2 | 31811306 G    | 22 | 43 A    | 0.0006167  |
| rs499362    | 2 | 31811572 A    | 22 | 43 C    | 0.0006167  |

|             |   |            |    |       |            |
|-------------|---|------------|----|-------|------------|
| rs633376    | 2 | 31815191 T | 16 | 38 G  | 0.0001777  |
| rs809364    | 2 | 31815453 A | 16 | 38 G  | 0.0001777  |
| rs646674    | 2 | 31815844 A | 16 | 36 G  | 0.0005556  |
| rs806646    | 2 | 31816197 A | 12 | 33 C  | 0.0002456  |
| rs1090846   | 2 | 31816341 T | 15 | 38 C  | 0.00008268 |
| rs600015    | 2 | 31820300 G | 20 | 41 C  | 0.0005156  |
| rs655548    | 2 | 31836658 A | 20 | 41 C  | 0.0005156  |
| rs477517    | 2 | 31848637 C | 19 | 39 T  | 0.0007998  |
| rs546935    | 2 | 31853674 A | 20 | 41 G  | 0.0005156  |
| rs35826411  | 2 | 31859226 C | 18 | 39 CA | 0.0004141  |
| rs71446010  | 2 | 31859714 C | 2  | 17 T  | 0.0001534  |
| rs481344    | 2 | 31859919 A | 18 | 39 G  | 0.0004141  |
| rs681482    | 2 | 31871256 A | 19 | 41 G  | 0.0002649  |
| rs589427    | 2 | 31872513 A | 19 | 39 T  | 0.0007998  |
| rs1580329   | 2 | 32016677 G | 20 | 41 A  | 0.0005156  |
| rs223675    | 2 | 32026249 A | 15 | 37 G  | 0.0001512  |
| rs10779914  | 2 | 32106040 A | 17 | 37 C  | 0.0006349  |
| 2:32194661  | 2 | 32194661 G | 23 | 6 T   | 0.0009286  |
| rs12478134  | 2 | 32240783 G | 15 | 34 C  | 0.0008313  |
| rs2280968   | 2 | 32290040 T | 16 | 36 G  | 0.0005556  |
| rs13017027  | 2 | 32291903 T | 13 | 33 C  | 0.0005413  |
| rs7556942   | 2 | 32295694 A | 16 | 36 G  | 0.0005556  |
| rs17011801  | 2 | 32298072 T | 16 | 36 A  | 0.0005556  |
| rs35112079  | 2 | 32302079 A | 16 | 36 G  | 0.0005556  |
| rs11695080  | 2 | 32316886 C | 11 | 30 G  | 0.0006171  |
| rs7557034   | 2 | 32316910 A | 13 | 32 T  | 0.0009401  |
| rs7569264   | 2 | 32316921 C | 13 | 32 A  | 0.0009401  |
| rs3769605   | 2 | 32322456 G | 16 | 37 A  | 0.0003171  |
| rs200363219 | 2 | 32327754 A | 16 | 38 G  | 0.0001777  |
| rs6543648   | 2 | 32330314 A | 16 | 36 G  | 0.0005556  |
| rs11676456  | 2 | 32331511 G | 13 | 33 A  | 0.0005413  |
| rs6756085   | 2 | 32336522 G | 16 | 36 A  | 0.0005556  |
| rs11691939  | 2 | 32339561 T | 16 | 36 C  | 0.0005556  |
| rs7574000   | 2 | 32342888 C | 16 | 36 A  | 0.0005556  |
| rs13006880  | 2 | 32355539 A | 13 | 33 G  | 0.0005413  |
| rs13013695  | 2 | 32391231 A | 14 | 33 G  | 0.0007122  |
| rs212682    | 2 | 32432864 A | 17 | 36 G  | 0.0009486  |
| rs212683    | 2 | 32432934 A | 16 | 36 T  | 0.0005556  |
| rs212702    | 2 | 32444250 A | 14 | 33 G  | 0.0007122  |
| rs212736    | 2 | 32473126 T | 14 | 33 C  | 0.0007122  |

|             |   |          |   |    |    |    |            |
|-------------|---|----------|---|----|----|----|------------|
| rs410469    | 2 | 32476992 | T | 16 | 36 | G  | 0.0005556  |
| rs7562653   | 2 | 32478629 | T | 16 | 36 | C  | 0.0005556  |
| rs805831    | 2 | 32484228 | C | 16 | 36 | G  | 0.0005556  |
| 2:33053011  | 2 | 33053011 | T | 4  | 20 | G  | 0.0003114  |
| rs10209371  | 2 | 34499096 | T | 12 | 0  | G  | 0.0003422  |
| rs4670081   | 2 | 34502152 | A | 12 | 0  | T  | 0.0003422  |
| rs12467806  | 2 | 34505794 | A | 14 | 0  | T  | 0.00007436 |
| rs12471653  | 2 | 34505864 | G | 14 | 0  | A  | 0.00007436 |
| rs12464598  | 2 | 34506082 | A | 14 | 0  | G  | 0.00007436 |
| rs12472526  | 2 | 34506118 | T | 14 | 0  | A  | 0.00007436 |
| rs62161745  | 2 | 34507526 | G | 11 | 0  | T  | 0.0007274  |
| rs62161746  | 2 | 34507719 | T | 11 | 0  | C  | 0.0007274  |
| rs113919160 | 2 | 34508173 | C | 11 | 0  | CA | 0.0007274  |
| rs60870684  | 2 | 34508506 | T | 11 | 0  | G  | 0.0007274  |
| rs62161748  | 2 | 34508621 | A | 11 | 0  | G  | 0.0007274  |
| rs72784834  | 2 | 34508878 | A | 11 | 0  | G  | 0.0007274  |
| rs72784835  | 2 | 34509004 | A | 11 | 0  | G  | 0.0007274  |
| rs7560487   | 2 | 34509206 | T | 12 | 0  | C  | 0.0003422  |
| rs2042116   | 2 | 34509330 | T | 12 | 0  | C  | 0.0003422  |
| rs12233151  | 2 | 34509401 | T | 12 | 0  | A  | 0.0003422  |
| rs62161749  | 2 | 34510104 | T | 12 | 0  | A  | 0.0003422  |
| rs62161750  | 2 | 34510193 | T | 12 | 0  | C  | 0.0003422  |
| rs60878936  | 2 | 34515125 | T | 12 | 0  | G  | 0.0003422  |
| rs7563223   | 2 | 34515235 | T | 11 | 0  | C  | 0.0007274  |
| rs62161754  | 2 | 34517349 | C | 12 | 0  | T  | 0.0003422  |
| 2:34517480  | 2 | 34517480 | G | 12 | 0  | C  | 0.0003567  |
| rs73928244  | 2 | 34517528 | T | 12 | 0  | C  | 0.0003422  |
| rs72784842  | 2 | 34517583 | G | 12 | 0  | A  | 0.0003422  |
| rs62163160  | 2 | 34517873 | T | 12 | 0  | C  | 0.0003422  |
| rs6728480   | 2 | 34519448 | T | 12 | 0  | C  | 0.0003422  |
| rs4327215   | 2 | 34529017 | C | 12 | 0  | T  | 0.0003422  |
| rs60147661  | 2 | 34530231 | C | 12 | 0  | T  | 0.0003422  |
| rs57032414  | 2 | 34530485 | C | 12 | 0  | A  | 0.0003422  |
| rs305178    | 2 | 36365019 | T | 18 | 39 | C  | 0.0004141  |
| rs1397444   | 2 | 36365804 | G | 18 | 39 | A  | 0.0004141  |
| rs959734    | 2 | 36365806 | G | 18 | 39 | A  | 0.0004141  |
| rs305179    | 2 | 36366492 | G | 18 | 39 | C  | 0.0004141  |
| rs11903069  | 2 | 38558787 | T | 40 | 16 | C  | 0.0006273  |
| rs10177042  | 2 | 38563527 | G | 38 | 15 | C  | 0.0005267  |
| rs13020216  | 2 | 38592175 | C | 30 | 10 | G  | 0.0006142  |



|             |   |                 |    |                          |            |
|-------------|---|-----------------|----|--------------------------|------------|
| rs112517328 | 2 | 38596390 G      | 36 | 14 A                     | 0.0007756  |
| rs78494590  | 2 | 42151474 T      | 2  | 15 C                     | 0.0006243  |
| rs4952547   | 2 | 42157310 A      | 2  | 15 G                     | 0.0006243  |
| rs11888637  | 2 | 45517967 A      | 1  | 13 G                     | 0.0005059  |
| rs17036673  | 2 | 47788177 T      | 25 | 7 C                      | 0.0008092  |
| rs1922043   | 2 | 47794960 C      | 5  | 22 T                     | 0.000274   |
| rs66500421  | 2 | 50828081 AT     | 31 | 53 A                     | 0.0005517  |
| rs10186698  | 2 | 50835669 A      | 51 | 27 G                     | 0.0009437  |
| 2:50835683  | 2 | 50835683 AGTTGC | 31 | 53 A                     | 0.0005517  |
| 2:50835684  | 2 | 50835684 A      | 31 | 53 AAAAT                 | 0.0005517  |
| rs372996983 | 2 | 52271700 T      | 14 | 37 C                     | 0.0001176  |
| rs34393418  | 2 | 52274004 C      | 19 | 40 G                     | 0.0004646  |
| rs4504033   | 2 | 52280819 G      | 19 | 40 C                     | 0.0004646  |
| 2:60676657  | 2 | 60676657 C      | 8  | 26 T                     | 0.0005183  |
| rs115595309 | 2 | 67226030 A      | 14 | 1 C                      | 0.0006347  |
| rs62146967  | 2 | 68717683 G      | 0  | 11 A                     | 0.0002715  |
| rs113302059 | 2 | 68773407 C      | 0  | 10 T                     | 0.0005917  |
| rs6546916   | 2 | 74872278 A      | 0  | 10 C                     | 0.0005917  |
| 2:76784102  | 2 | 76784102 G      | 12 | 31 GCAGGAGTTGGGCTGAGATTA | 0.0007989  |
| rs10865433  | 2 | 78608101 A      | 33 | 55 G                     | 0.0005652  |
| 2:80215593  | 2 | 80215593 T      | 12 | 0 TG                     | 0.0003315  |
| 2:80215595  | 2 | 80215595 T      | 12 | 0 TG                     | 0.0003422  |
| 2:81836822  | 2 | 81836822 G      | 21 | 4 A                      | 0.0003768  |
| rs112093957 | 2 | 81836835 T      | 21 | 4 C                      | 0.0004069  |
| rs113406922 | 2 | 81836843 C      | 21 | 4 T                      | 0.0004069  |
| rs7589987   | 2 | 83349542 G      | 0  | 10 C                     | 0.0005917  |
| rs112124898 | 2 | 84581600 A      | 0  | 13 G                     | 0.00005596 |
| rs77159567  | 2 | 84614874 A      | 0  | 13 T                     | 0.00005596 |
| rs11126962  | 2 | 84638116 C      | 0  | 13 A                     | 0.00005596 |
| 2:84647251  | 2 | 84647251 T      | 0  | 10 TA                    | 0.0005917  |
| rs142296229 | 2 | 84672087 T      | 0  | 13 C                     | 0.00005596 |
| rs76990652  | 2 | 84676268 C      | 0  | 12 T                     | 0.0001237  |
| rs111878765 | 2 | 84714899 A      | 0  | 13 G                     | 0.00005596 |
| rs11687501  | 2 | 85009989 A      | 0  | 12 G                     | 0.0001237  |
| rs183611857 | 2 | 85056725 A      | 0  | 11 G                     | 0.0002715  |
| rs11686064  | 2 | 85063529 A      | 0  | 11 G                     | 0.0002715  |
| rs192817406 | 2 | 85232419 T      | 1  | 13 A                     | 0.0004468  |
| rs74200635  | 2 | 92085478 A      | 16 | 1 G                      | 0.0001529  |
| 2:95489456  | 2 | 95489456 CA     | 0  | 10 C                     | 0.0005917  |
| rs11679277  | 2 | 104572488 G     | 3  | 17 A                     | 0.0006426  |

|             |                |    |                   |            |
|-------------|----------------|----|-------------------|------------|
| rs72823440  | 2 112490418 A  | 32 | 12 G              | 0.0008741  |
| rs369400020 | 2 112490536 C  | 29 | 10 G              | 0.0009257  |
| rs199891994 | 2 112495314 T  | 32 | 11 TGAG           | 0.0004661  |
| 2:112508450 | 2 112508450 A  | 21 | 4 G               | 0.0004416  |
| rs926894    | 2 114302987 A  | 32 | 55 G              | 0.0005264  |
| rs13022237  | 2 116416128 G  | 9  | 31 A              | 0.00005656 |
| rs13027654  | 2 116416368 G  | 9  | 31 A              | 0.00005656 |
| rs7589670   | 2 116419064 C  | 9  | 27 T              | 0.000654   |
| rs13022167  | 2 116419585 C  | 9  | 31 G              | 0.00005656 |
| rs35366441  | 2 116421476 T  | 9  | 27 C              | 0.000654   |
| rs34140584  | 2 116421875 G  | 9  | 27 A              | 0.000654   |
| rs6734750   | 2 116422034 C  | 9  | 28 G              | 0.0003633  |
| rs148563780 | 2 116434973 A  | 9  | 27 AAAATGATAGGAGT | 0.000654   |
| rs139435503 | 2 116435048 TA | 9  | 27 T              | 0.000654   |
| rs72828530  | 2 116444588 A  | 9  | 27 G              | 0.000654   |
| rs4849823   | 2 120873745 T  | 0  | 10 A              | 0.0005917  |
| rs149180687 | 2 120945130 A  | 0  | 11 G              | 0.0002715  |
| rs113551833 | 2 120962553 A  | 0  | 11 G              | 0.0002715  |
| rs3930389   | 2 130983388 G  | 36 | 57 A              | 0.0006352  |
| 2:133251079 | 2 133251079 A  | 48 | 24 AT             | 0.0007984  |
| rs12993602  | 2 133348884 T  | 0  | 10 C              | 0.0005917  |
| 2:142514117 | 2 142514117 T  | 24 | 6 C               | 0.0005592  |
| rs7560287   | 2 144093803 A  | 39 | 16 C              | 0.0006105  |
| rs4972338   | 2 148974872 T  | 45 | 21 A              | 0.0006315  |
| rs77388016  | 2 151733840 T  | 1  | 13 C              | 0.0005059  |
| rs12151724  | 2 151734715 A  | 1  | 13 T              | 0.0005059  |
| rs79308412  | 2 151737087 A  | 1  | 13 G              | 0.0005059  |
| rs57209901  | 2 155227443 A  | 12 | 0 G               | 0.0003422  |
| rs707058    | 2 155281517 C  | 11 | 0 G               | 0.0007274  |
| rs707060    | 2 155281911 T  | 11 | 0 C               | 0.0007274  |
| rs707061    | 2 155282560 A  | 11 | 0 G               | 0.0007274  |
| rs150215636 | 2 155288342 G  | 11 | 0 GC              | 0.0007274  |
| rs75739412  | 2 155289152 T  | 11 | 0 C               | 0.0007274  |
| rs1405934   | 2 155294658 C  | 18 | 3 T               | 0.0008121  |
| rs1527862   | 2 155294795 T  | 18 | 3 C               | 0.0008121  |
| rs1527861   | 2 155294870 A  | 18 | 3 G               | 0.0008121  |
| rs113055622 | 2 155298558 T  | 11 | 0 TTC             | 0.0007274  |
| rs4140692   | 2 155298682 A  | 11 | 0 G               | 0.0007274  |
| rs74986530  | 2 155308126 A  | 11 | 0 G               | 0.0007274  |
| rs201005680 | 2 162141748 T  | 11 | 0 TATC            | 0.0007274  |

|             |               |    |                 |           |
|-------------|---------------|----|-----------------|-----------|
| rs115432269 | 2 162184233 A | 11 | 0 G             | 0.0007274 |
| rs138541092 | 2 162252833 A | 11 | 0 G             | 0.0007274 |
| rs62187573  | 2 162378064 A | 1  | 13 G            | 0.0005059 |
| rs2021253   | 2 167864215 T | 9  | 30 A            | 0.0001068 |
| rs5836182   | 2 169137688 A | 5  | 20 ACTT         | 0.0009659 |
| rs4458184   | 2 169140909 A | 5  | 20 C            | 0.0009659 |
| rs73971596  | 2 169143262 A | 2  | 15 C            | 0.0006243 |
| rs377300030 | 2 169146356 T | 2  | 15 TTTCAATTATTA | 0.0006243 |
| rs79898710  | 2 169156742 A | 2  | 16 G            | 0.0003115 |
| rs77343714  | 2 169160724 T | 2  | 16 C            | 0.0003115 |
| rs10172808  | 2 169163422 C | 2  | 16 T            | 0.0003115 |
| rs9646776   | 2 169165476 T | 2  | 16 C            | 0.0003115 |
| rs182471681 | 2 171688146 G | 29 | 9 A             | 0.000837  |
| rs10198915  | 2 172361623 T | 2  | 15 C            | 0.0006243 |
| rs7575777   | 2 178775157 C | 1  | 13 A            | 0.0005059 |
| rs62177379  | 2 185032159 C | 1  | 13 G            | 0.0005059 |
| rs62177381  | 2 185033003 T | 1  | 13 C            | 0.0005059 |
| rs2887422   | 2 185033177 A | 1  | 13 C            | 0.0005059 |
| rs62177383  | 2 185034151 T | 1  | 13 C            | 0.0005059 |
| rs62177384  | 2 185034415 A | 1  | 13 G            | 0.0005059 |
| rs62177385  | 2 185034736 A | 1  | 13 T            | 0.0005059 |
| rs62177386  | 2 185034972 A | 1  | 13 G            | 0.0005059 |
| rs62177387  | 2 185035801 A | 1  | 13 T            | 0.0005059 |
| rs62177389  | 2 185036793 G | 1  | 13 T            | 0.0005059 |
| rs72899135  | 2 185037027 G | 1  | 13 A            | 0.0005059 |
| rs62177390  | 2 185037166 T | 1  | 13 A            | 0.0005059 |
| rs76252472  | 2 185037434 C | 1  | 13 T            | 0.0005059 |
| rs62177391  | 2 185037945 C | 1  | 13 T            | 0.0005059 |
| rs62177392  | 2 185039059 C | 1  | 13 T            | 0.0005059 |
| rs17731073  | 2 185039398 G | 1  | 13 A            | 0.0005059 |
| rs1997131   | 2 185043362 A | 1  | 14 G            | 0.0002433 |
| rs62174972  | 2 185046363 T | 1  | 13 C            | 0.0005059 |
| rs143304053 | 2 185047784 T | 1  | 13 TA           | 0.0005059 |
| rs1526197   | 2 185050101 A | 1  | 14 G            | 0.0002433 |
| rs6434076   | 2 185052186 A | 1  | 14 C            | 0.0002433 |
| rs1526221   | 2 185053799 T | 1  | 13 C            | 0.0005059 |
| rs62174975  | 2 185054451 G | 1  | 13 A            | 0.0005059 |
| rs62174979  | 2 185063778 T | 1  | 13 C            | 0.0005059 |
| rs62174980  | 2 185065710 G | 1  | 13 A            | 0.0005059 |
| rs62174981  | 2 185069101 T | 1  | 13 C            | 0.0005059 |

|             |                   |   |         |           |
|-------------|-------------------|---|---------|-----------|
| rs62174982  | 2 185072575 A     | 1 | 13 G    | 0.0005059 |
| rs62174984  | 2 185073913 T     | 1 | 13 C    | 0.0005059 |
| rs35785665  | 2 185074545 CAAAG | 1 | 13 C    | 0.0005059 |
| rs62174985  | 2 185075253 G     | 1 | 13 T    | 0.0005059 |
| rs62174986  | 2 185075686 G     | 1 | 13 A    | 0.0005059 |
| rs11898206  | 2 185076065 A     | 1 | 13 G    | 0.0005059 |
| rs62174989  | 2 185078573 T     | 1 | 13 C    | 0.0005677 |
| rs62174991  | 2 185079639 G     | 1 | 13 A    | 0.0005059 |
| rs62175002  | 2 185080161 T     | 1 | 13 C    | 0.0005059 |
| rs62175003  | 2 185080522 T     | 1 | 13 C    | 0.0005059 |
| rs137891463 | 2 185081236 C     | 1 | 13 CTTG | 0.0005059 |
| rs62175004  | 2 185081554 G     | 1 | 13 T    | 0.0005059 |
| rs6761905   | 2 185084032 A     | 1 | 13 G    | 0.0005059 |
| rs62175006  | 2 185085379 A     | 1 | 13 T    | 0.0005059 |
| rs6740051   | 2 185089218 G     | 1 | 13 T    | 0.0005059 |
| rs62175008  | 2 185094412 A     | 1 | 13 G    | 0.0005059 |
| rs62175009  | 2 185095250 A     | 1 | 13 G    | 0.0005059 |
| rs62175010  | 2 185095398 A     | 1 | 13 T    | 0.0005059 |
| rs199679700 | 2 185095737 G     | 1 | 13 GA   | 0.0005059 |
| 2:185095973 | 2 185095973 G     | 1 | 13 A    | 0.0005059 |
| rs140916704 | 2 185097051 A     | 1 | 13 T    | 0.0005059 |
| rs192589595 | 2 185097484 T     | 1 | 13 G    | 0.0005059 |
| rs114033272 | 2 185098646 A     | 1 | 13 G    | 0.0005059 |
| rs374539716 | 2 185098987 C     | 1 | 13 T    | 0.0005059 |
| rs62175014  | 2 185099359 G     | 1 | 13 A    | 0.0005059 |
| rs72901145  | 2 185101311 G     | 1 | 13 A    | 0.0005059 |
| rs62175015  | 2 185102632 A     | 1 | 13 T    | 0.0005059 |
| rs144666042 | 2 185106285 GT    | 1 | 13 G    | 0.0005059 |
| rs7573114   | 2 185106611 G     | 1 | 13 A    | 0.0005059 |
| rs72901158  | 2 185107454 T     | 1 | 13 C    | 0.0005059 |
| rs62175018  | 2 185107950 T     | 1 | 13 C    | 0.0005059 |
| rs146114313 | 2 185108358 T     | 1 | 13 G    | 0.0005059 |
| rs75506748  | 2 185108659 T     | 1 | 13 C    | 0.0005059 |
| rs145128486 | 2 185110879 C     | 1 | 13 G    | 0.0005059 |
| rs114689984 | 2 185110884 A     | 1 | 13 G    | 0.0005059 |
| rs62175039  | 2 185111974 G     | 1 | 13 A    | 0.0005059 |
| rs145452825 | 2 185123754 A     | 1 | 13 AG   | 0.0005059 |
| rs62175045  | 2 185127055 G     | 1 | 13 A    | 0.0005059 |
| rs62175046  | 2 185128471 G     | 1 | 13 T    | 0.0005059 |
| rs141835155 | 2 185130171 A     | 1 | 13 G    | 0.0005059 |

|             |                  |   |           |           |
|-------------|------------------|---|-----------|-----------|
| rs7583823   | 2 185131751 C    | 1 | 13 G      | 0.0005059 |
| rs62175048  | 2 185132406 A    | 1 | 13 C      | 0.0005059 |
| rs62175049  | 2 185133991 A    | 1 | 13 G      | 0.0005059 |
| rs62175050  | 2 185134523 C    | 1 | 13 T      | 0.0005059 |
| rs62175051  | 2 185134819 A    | 1 | 13 G      | 0.0005059 |
| rs62175052  | 2 185139542 T    | 1 | 13 C      | 0.0005059 |
| rs62175053  | 2 185141889 C    | 1 | 13 T      | 0.0005059 |
| rs62175054  | 2 185142492 G    | 1 | 13 T      | 0.0005059 |
| rs62175055  | 2 185142687 G    | 1 | 13 C      | 0.0005059 |
| rs62175056  | 2 185142987 C    | 1 | 13 T      | 0.0005059 |
| rs62175057  | 2 185142997 C    | 1 | 13 G      | 0.0005059 |
| rs62175058  | 2 185143454 A    | 1 | 13 G      | 0.0005059 |
| rs62175059  | 2 185144017 T    | 1 | 13 A      | 0.0005059 |
| rs62176360  | 2 185144106 T    | 1 | 13 C      | 0.0005059 |
| rs62176361  | 2 185144746 T    | 1 | 13 C      | 0.0005059 |
| rs62176362  | 2 185145036 C    | 1 | 13 T      | 0.0005059 |
| rs62176363  | 2 185145087 T    | 1 | 13 C      | 0.0005059 |
| rs62176365  | 2 185146314 T    | 1 | 13 C      | 0.0005059 |
| rs371708927 | 2 185147621 T    | 1 | 13 TA     | 0.0005059 |
| rs114146281 | 2 185149046 C    | 1 | 13 T      | 0.0005059 |
| rs62176368  | 2 185149266 C    | 1 | 13 G      | 0.0005059 |
| rs369214888 | 2 185149958 A    | 1 | 13 ACTT   | 0.0005059 |
| rs114288133 | 2 185150059 G    | 1 | 13 A      | 0.0005059 |
| rs62176370  | 2 185151717 C    | 1 | 13 T      | 0.0005059 |
| rs62176371  | 2 185151931 T    | 1 | 14 C      | 0.0002433 |
| rs138276885 | 2 185152116 T    | 1 | 13 TG     | 0.0005059 |
| rs62176372  | 2 185153440 A    | 1 | 13 T      | 0.0005059 |
| rs62176373  | 2 185155330 T    | 1 | 13 C      | 0.0005059 |
| rs62176374  | 2 185156242 G    | 1 | 13 T      | 0.0005059 |
| rs62176375  | 2 185156417 C    | 1 | 13 T      | 0.0005059 |
| rs62176376  | 2 185157153 C    | 1 | 13 A      | 0.0005059 |
| rs72902844  | 2 185160201 C    | 1 | 12 T      | 0.0009301 |
| rs62176377  | 2 185161614 T    | 1 | 13 C      | 0.0005059 |
| rs78132165  | 2 185161691 CAGT | 1 | 13 C      | 0.0005059 |
| rs62176378  | 2 185162261 T    | 1 | 13 C      | 0.0005059 |
| rs62176379  | 2 185162676 A    | 1 | 13 C      | 0.0005059 |
| rs62176403  | 2 185162915 G    | 1 | 13 A      | 0.0005059 |
| rs62176404  | 2 185163029 A    | 1 | 13 G      | 0.0005059 |
| rs62176405  | 2 185164825 C    | 1 | 13 T      | 0.0005059 |
| rs141925621 | 2 185165351 C    | 1 | 13 CTCTTT | 0.0005059 |

|             |   |           |   |   |    |       |           |
|-------------|---|-----------|---|---|----|-------|-----------|
| rs62176406  | 2 | 185165485 | G | 1 | 13 | T     | 0.0005059 |
| rs78692314  | 2 | 185165873 | C | 1 | 13 | CAAAA | 0.0005059 |
| rs76479285  | 2 | 185166232 | G | 1 | 13 | A     | 0.0005059 |
| rs72902855  | 2 | 185166276 | T | 1 | 13 | C     | 0.0005059 |
| rs62176407  | 2 | 185166354 | T | 1 | 13 | C     | 0.0005059 |
| rs62176408  | 2 | 185167352 | T | 1 | 13 | A     | 0.0005059 |
| rs372320639 | 2 | 185167618 | G | 1 | 13 | GA    | 0.0005059 |
| rs72902858  | 2 | 185167658 | T | 1 | 13 | A     | 0.0005059 |
| rs72902859  | 2 | 185167981 | A | 1 | 13 | G     | 0.0005059 |
| rs62176409  | 2 | 185168320 | T | 1 | 13 | C     | 0.0005059 |
| rs62176410  | 2 | 185169634 | G | 1 | 13 | A     | 0.0005059 |
| rs62176411  | 2 | 185169886 | G | 1 | 13 | A     | 0.0005059 |
| rs72902865  | 2 | 185169986 | G | 1 | 13 | A     | 0.0005059 |
| rs75542286  | 2 | 185170297 | C | 1 | 13 | CAT   | 0.0005059 |
| rs149343308 | 2 | 185170458 | T | 1 | 13 | TGC   | 0.0005059 |
| rs62176412  | 2 | 185170949 | C | 1 | 13 | A     | 0.0005059 |
| rs72902870  | 2 | 185171140 | G | 1 | 13 | C     | 0.0005059 |
| rs62176413  | 2 | 185172097 | A | 1 | 13 | G     | 0.0005059 |
| rs62176414  | 2 | 185172128 | C | 1 | 13 | T     | 0.0005059 |
| rs62176415  | 2 | 185172414 | A | 1 | 13 | G     | 0.0005059 |
| rs142990632 | 2 | 185172860 | A | 1 | 13 | AG    | 0.0005059 |
| rs62176416  | 2 | 185174164 | G | 1 | 13 | A     | 0.0005059 |
| rs145121164 | 2 | 185174492 | G | 1 | 13 | GTA   | 0.0005059 |
| rs72902879  | 2 | 185174679 | C | 1 | 13 | T     | 0.0005059 |
| rs62176417  | 2 | 185174954 | A | 1 | 13 | C     | 0.0005059 |
| rs62176418  | 2 | 185175198 | A | 1 | 13 | C     | 0.0005059 |
| rs62176419  | 2 | 185175735 | G | 1 | 13 | A     | 0.0005059 |
| rs62176420  | 2 | 185175888 | G | 1 | 13 | A     | 0.0005059 |
| rs62176421  | 2 | 185176240 | G | 1 | 13 | T     | 0.0005059 |
| rs62176422  | 2 | 185176824 | A | 1 | 13 | G     | 0.0005059 |
| rs62176423  | 2 | 185176938 | T | 1 | 13 | A     | 0.0005059 |
| rs62176424  | 2 | 185177445 | G | 1 | 13 | T     | 0.0005059 |
| rs72902884  | 2 | 185177666 | C | 1 | 13 | G     | 0.0005059 |
| rs72902886  | 2 | 185177667 | T | 1 | 13 | C     | 0.0005059 |
| rs62176425  | 2 | 185178438 | T | 1 | 13 | C     | 0.0005059 |
| rs62176426  | 2 | 185178614 | G | 1 | 13 | A     | 0.0005059 |
| rs62176427  | 2 | 185178930 | G | 1 | 13 | C     | 0.0005059 |
| rs72902891  | 2 | 185179144 | G | 1 | 13 | A     | 0.0005059 |
| rs62176428  | 2 | 185179190 | G | 1 | 13 | A     | 0.0005059 |
| rs62176430  | 2 | 185179619 | A | 1 | 13 | C     | 0.0005059 |

|             |                 |    |        |           |
|-------------|-----------------|----|--------|-----------|
| rs62176431  | 2 185179701 G   | 1  | 13 A   | 0.0005059 |
| rs62176434  | 2 185180247 C   | 1  | 13 T   | 0.0005059 |
| rs72902897  | 2 185181063 G   | 1  | 13 A   | 0.0005059 |
| rs62176436  | 2 185181923 T   | 1  | 13 C   | 0.0005059 |
| rs62176437  | 2 185182064 A   | 1  | 13 G   | 0.0005059 |
| rs147000256 | 2 185182163 G   | 1  | 13 GT  | 0.0005059 |
| rs72902901  | 2 185182222 A   | 1  | 13 G   | 0.0005059 |
| rs72904804  | 2 185182521 T   | 1  | 13 G   | 0.0005059 |
| rs62176438  | 2 185182987 G   | 1  | 13 T   | 0.0005059 |
| rs72904810  | 2 185183783 G   | 1  | 13 A   | 0.0005059 |
| rs62176439  | 2 185184017 C   | 1  | 13 T   | 0.0005059 |
| rs62176440  | 2 185184711 A   | 1  | 13 G   | 0.0005059 |
| rs72904818  | 2 185185261 A   | 1  | 13 G   | 0.0005059 |
| rs62176441  | 2 185187646 T   | 1  | 13 C   | 0.0005059 |
| 2:185187774 | 2 185187774 ATC | 1  | 13 A   | 0.0005059 |
| rs78434879  | 2 185187780 C   | 1  | 13 G   | 0.0005059 |
| rs10177272  | 2 185189820 A   | 1  | 13 G   | 0.0004468 |
| rs376234709 | 2 185196329 G   | 1  | 14 A   | 0.0002433 |
| rs13023807  | 2 185295053 G   | 11 | 30 A   | 0.0006452 |
| 2:206745639 | 2 206745639 CAA | 35 | 12 C   | 0.0001485 |
| rs71422753  | 2 212603099 G   | 58 | 33 T   | 0.0009818 |
| rs62183021  | 2 212611713 A   | 41 | 16 G   | 0.000199  |
| rs74436564  | 2 212614240 T   | 41 | 16 TGG | 0.000199  |
| rs7601502   | 2 212617805 A   | 41 | 16 G   | 0.000199  |
| rs72948506  | 2 212618440 A   | 41 | 17 G   | 0.0004047 |
| rs62183023  | 2 212618746 T   | 40 | 17 C   | 0.0006981 |
| rs62183024  | 2 212618836 T   | 41 | 17 C   | 0.0004047 |
| rs61079605  | 2 212621761 T   | 41 | 17 A   | 0.0004047 |
| rs7600261   | 2 212622818 T   | 41 | 17 C   | 0.0004047 |
| rs55758468  | 2 212629822 A   | 42 | 17 G   | 0.0002305 |
| rs62183028  | 2 212631483 T   | 42 | 18 G   | 0.0004599 |
| rs62183029  | 2 212632452 A   | 42 | 18 G   | 0.0004599 |
| rs55769536  | 2 212634084 T   | 43 | 17 A   | 0.000129  |
| rs7583068   | 2 212634108 A   | 46 | 21 T   | 0.0003668 |
| rs4132462   | 2 212635589 T   | 41 | 18 C   | 0.0007885 |
| rs7576466   | 2 212635881 G   | 25 | 46 T   | 0.0007575 |
| rs62183031  | 2 212636271 C   | 41 | 17 A   | 0.0004047 |
| rs62183032  | 2 212638862 A   | 25 | 47 G   | 0.0004398 |
| rs72948544  | 2 212667092 C   | 20 | 4 T    | 0.0007606 |
| rs11677054  | 2 214951436 A   | 50 | 26 G   | 0.0008986 |

|             |                |    |         |             |
|-------------|----------------|----|---------|-------------|
| 2:214973202 | 2 214973202 C  | 20 | 4 CA    | 0.0007481   |
| rs35422889  | 2 219809760 T  | 9  | 29 C    | 0.0001986   |
| rs13000521  | 2 228094994 A  | 22 | 5 G     | 0.0006676   |
| rs11691091  | 2 228096921 A  | 22 | 5 G     | 0.0006676   |
| rs12478772  | 2 228101249 A  | 22 | 5 T     | 0.0006676   |
| rs12694723  | 2 228101905 G  | 22 | 5 A     | 0.0006676   |
| rs10167041  | 2 228123661 G  | 54 | 28 A    | 0.0003346   |
| rs4332918   | 2 228124702 G  | 53 | 28 A    | 0.00058     |
| rs57569440  | 2 228125276 GA | 54 | 28 G    | 0.0003346   |
| rs6436670   | 2 228126494 C  | 19 | 48 T    | 0.000003024 |
| rs4643535   | 2 228133809 G  | 21 | 43 A    | 0.0003256   |
| rs4608502   | 2 228134155 T  | 21 | 43 C    | 0.0003256   |
| rs7606754   | 2 228135180 A  | 21 | 43 G    | 0.0003256   |
| rs143937055 | 2 228143966 T  | 21 | 43 TTTG | 0.0003256   |
| rs62279162  | 2 228162280 G  | 21 | 43 T    | 0.0003256   |
| rs62279163  | 2 228168099 A  | 21 | 43 C    | 0.0003256   |
| rs12471801  | 2 228171326 C  | 21 | 43 A    | 0.0003256   |
| rs4305262   | 2 228174518 A  | 21 | 43 T    | 0.0003256   |
| rs57817160  | 2 228179238 A  | 21 | 43 G    | 0.0003256   |
| rs59257065  | 2 228179328 T  | 21 | 43 C    | 0.0003256   |
| rs10173844  | 2 228185809 A  | 20 | 43 G    | 0.0001658   |
| rs58670479  | 2 228192473 T  | 21 | 43 G    | 0.0003256   |
| 2:228196864 | 2 228196864 AT | 21 | 43 A    | 0.0003256   |
| rs62279170  | 2 228197701 G  | 20 | 43 C    | 0.0001658   |
| rs6754433   | 2 228198773 G  | 21 | 43 A    | 0.0003256   |
| rs62279171  | 2 228199759 T  | 21 | 43 C    | 0.0003256   |
| rs62279172  | 2 228203142 A  | 21 | 42 G    | 0.0005665   |
| rs61293565  | 2 228206567 G  | 21 | 43 A    | 0.0003256   |
| rs62279174  | 2 228207842 C  | 21 | 43 T    | 0.0003256   |
| rs6721179   | 2 228210499 G  | 21 | 43 A    | 0.0003256   |
| rs56022659  | 2 228212798 C  | 20 | 43 G    | 0.0001658   |
| rs59419007  | 2 228214716 G  | 20 | 43 A    | 0.0001658   |
| rs12478005  | 2 228220528 C  | 20 | 43 T    | 0.0001658   |
| rs7560053   | 2 228220769 T  | 20 | 43 C    | 0.0001658   |
| rs8222      | 2 228222293 G  | 20 | 43 C    | 0.0001658   |
| rs4675171   | 2 228225144 T  | 20 | 43 C    | 0.0001658   |
| rs62189960  | 2 228619651 T  | 11 | 0 C     | 0.0007274   |
| rs72969092  | 2 229017492 C  | 31 | 11 T    | 0.0008085   |
| rs75339037  | 2 229022874 G  | 25 | 6 A     | 0.0003059   |
| rs76762410  | 2 229022909 A  | 25 | 6 G     | 0.0003059   |



|             |                    |    |          |           |
|-------------|--------------------|----|----------|-----------|
| rs6722800   | 2 229023710 T      | 25 | 7 C      | 0.0008092 |
| rs6723112   | 2 229023821 C      | 25 | 7 G      | 0.0008092 |
| rs13400035  | 2 229024387 G      | 25 | 7 A      | 0.0008092 |
| rs78117385  | 2 229025814 A      | 25 | 7 G      | 0.0008092 |
| rs12479323  | 2 229026121 A      | 25 | 7 G      | 0.0008092 |
| 2:229026423 | 2 229026423 CAAAAT | 25 | 7 C      | 0.0008092 |
| rs61383612  | 2 229027437 A      | 25 | 7 G      | 0.0008092 |
| rs59742648  | 2 229027581 AT     | 25 | 7 A      | 0.0008092 |
| rs12465409  | 2 229027869 A      | 25 | 7 G      | 0.0008092 |
| rs12465384  | 2 229027919 T      | 25 | 7 C      | 0.0008092 |
| rs35867399  | 2 229028923 T      | 25 | 7 TA     | 0.0008092 |
| rs4471882   | 2 229029290 A      | 25 | 7 T      | 0.0008092 |
| rs4299327   | 2 229029307 T      | 25 | 7 C      | 0.0008092 |
| rs4305256   | 2 229029318 C      | 25 | 7 T      | 0.0008092 |
| rs4327223   | 2 229029615 C      | 25 | 7 T      | 0.0008092 |
| rs4525684   | 2 229029654 C      | 25 | 7 T      | 0.0008092 |
| rs13409234  | 2 229029823 C      | 25 | 7 T      | 0.0008092 |
| rs13409651  | 2 229030197 G      | 25 | 7 T      | 0.0008092 |
| rs79663725  | 2 229030283 T      | 25 | 7 C      | 0.0008092 |
| rs13405515  | 2 229030704 G      | 25 | 7 A      | 0.0008092 |
| rs13431126  | 2 229030793 T      | 25 | 7 C      | 0.0008092 |
| rs13394274  | 2 229031301 C      | 25 | 7 T      | 0.0008092 |
| rs13406252  | 2 229031435 G      | 25 | 7 A      | 0.0008092 |
| rs13409017  | 2 229031613 T      | 25 | 7 A      | 0.0008092 |
| rs13409131  | 2 229031700 G      | 25 | 7 A      | 0.0008092 |
| rs12615268  | 2 229032048 C      | 25 | 7 T      | 0.0008092 |
| rs12611873  | 2 229032110 T      | 25 | 7 C      | 0.0008092 |
| rs12611925  | 2 229032333 T      | 25 | 7 C      | 0.0008092 |
| rs13384573  | 2 229032373 A      | 25 | 7 G      | 0.0008092 |
| rs5839255   | 2 229032907 AT     | 25 | 7 A      | 0.0008092 |
| rs4337464   | 2 229033111 G      | 25 | 7 A      | 0.0008092 |
| rs4341920   | 2 229033188 G      | 25 | 7 A      | 0.0008092 |
| rs4616469   | 2 229033372 C      | 25 | 7 T      | 0.0008092 |
| rs13413606  | 2 229033525 C      | 25 | 7 A      | 0.0008092 |
| rs4350738   | 2 229033739 T      | 25 | 7 C      | 0.0008092 |
| rs375788592 | 2 229033789 G      | 25 | 7 GAAGAA | 0.0008092 |
| rs4574108   | 2 229033814 A      | 25 | 7 G      | 0.0008092 |
| rs4344926   | 2 229033990 T      | 25 | 7 A      | 0.0008092 |
| rs10173045  | 2 229034108 G      | 25 | 7 C      | 0.0008092 |
| rs10196700  | 2 229034233 G      | 25 | 7 A      | 0.0008092 |

|             |                  |    |          |             |
|-------------|------------------|----|----------|-------------|
| rs77131468  | 2 229034349 C    | 25 | 7 G      | 0.0008092   |
| rs28814657  | 2 229034629 T    | 25 | 7 G      | 0.0008092   |
| rs4630759   | 2 229035357 A    | 25 | 7 T      | 0.0008092   |
| rs4334483   | 2 229035442 T    | 25 | 7 A      | 0.0008092   |
| rs4364010   | 2 229035509 T    | 25 | 7 C      | 0.0008092   |
| rs10179300  | 2 229035717 T    | 25 | 7 C      | 0.0008092   |
| rs10179408  | 2 229035869 A    | 25 | 7 C      | 0.0008092   |
| rs10203311  | 2 229036257 G    | 25 | 7 A      | 0.0008092   |
| rs10203410  | 2 229036304 G    | 25 | 7 A      | 0.0008092   |
| rs9653368   | 2 229036780 A    | 25 | 7 G      | 0.0008092   |
| rs13415645  | 2 229037167 C    | 25 | 7 T      | 0.0008092   |
| rs13402484  | 2 229037409 T    | 25 | 7 C      | 0.0008092   |
| rs13418687  | 2 229037643 C    | 25 | 7 T      | 0.0008092   |
| rs139083559 | 2 229037654 AAGG | 25 | 7 A      | 0.0008092   |
| rs13405360  | 2 229037779 T    | 25 | 7 C      | 0.0008092   |
| rs10188661  | 2 229043855 T    | 25 | 7 G      | 0.0008092   |
| rs6739369   | 2 229912852 C    | 11 | 0 A      | 0.0007274   |
| rs6748136   | 2 229915436 T    | 11 | 0 A      | 0.0007274   |
| rs10048696  | 2 229916288 C    | 11 | 0 A      | 0.0007274   |
| rs10176362  | 2 229917796 A    | 11 | 0 T      | 0.0007274   |
| rs16825626  | 2 229918641 C    | 11 | 0 T      | 0.0007274   |
| rs61410848  | 2 229918816 AG   | 11 | 0 A      | 0.0007274   |
| rs10490033  | 2 229918898 A    | 11 | 0 G      | 0.0007274   |
| rs60550348  | 2 229919102 T    | 11 | 0 C      | 0.0007274   |
| rs7599580   | 2 229919490 C    | 11 | 0 T      | 0.0007274   |
| rs11896929  | 2 229919667 G    | 11 | 0 A      | 0.0007274   |
| rs35907947  | 2 230495698 TG   | 29 | 50 T     | 0.0009027   |
| rs13006528  | 2 230498419 G    | 29 | 50 A     | 0.0009027   |
| rs2007965   | 2 230508050 A    | 26 | 50 G     | 0.0001475   |
| rs34056484  | 2 230508670 C    | 27 | 50 T     | 0.0002777   |
| rs35596599  | 2 230508778 C    | 27 | 50 T     | 0.0002777   |
| rs34851081  | 2 230508800 C    | 27 | 50 T     | 0.0002777   |
| rs11676294  | 2 230517972 T    | 19 | 40 G     | 0.0004646   |
| 2:230683757 | 2 230683757 C    | 30 | 6 CACACA | 0.00002435  |
| rs201762374 | 2 233200229 G    | 27 | 7 C      | 0.0002486   |
| rs115624040 | 2 233234727 A    | 0  | 11 C     | 0.0002715   |
| rs582082    | 2 234932954 T    | 51 | 26 G     | 0.0005284   |
| rs149600429 | 2 239768441 T    | 16 | 2 C      | 0.0007845   |
| rs139338240 | 2 239768515 T    | 16 | 2 C      | 0.0007845   |
| rs2019849   | 2 241048221 C    | 56 | 23 T     | 0.000002389 |

|             |   |           |                         |    |    |           |            |
|-------------|---|-----------|-------------------------|----|----|-----------|------------|
| rs4854030   | 2 | 241049147 | A                       | 30 | 51 | G         | 0.0009286  |
| rs4854029   | 2 | 241049148 | A                       | 30 | 51 | G         | 0.0009286  |
| rs6740952   | 2 | 241049626 | A                       | 30 | 51 | G         | 0.0009286  |
| rs10200500  | 2 | 241049977 | C                       | 30 | 51 | T         | 0.0009286  |
| rs10191379  | 2 | 241050051 | G                       | 29 | 51 | T         | 0.0005253  |
| 2:241050226 | 2 | 241050226 | TCCTCCTCCCCTCCTCCTCTCTC | 30 | 50 | T         | 0.0008697  |
| rs13414100  | 2 | 241050480 | G                       | 30 | 51 | A         | 0.0009286  |
| rs7572067   | 2 | 241051245 | C                       | 30 | 51 | T         | 0.0009286  |
| rs6721817   | 2 | 241051464 | C                       | 29 | 51 | T         | 0.0005253  |
| rs12478533  | 2 | 241250620 | T                       | 54 | 29 | G         | 0.0006016  |
| rs12478193  | 2 | 241252539 | C                       | 54 | 29 | T         | 0.0006016  |
| rs6748055   | 2 | 241262641 | A                       | 55 | 30 | G         | 0.0006201  |
| rs2675296   | 3 | 2750753   | C                       | 42 | 19 | T         | 0.0008809  |
| rs9870347   | 3 | 3429642   | T                       | 30 | 10 | C         | 0.0006347  |
| rs9831715   | 3 | 3429710   | A                       | 27 | 8  | G         | 0.0006326  |
| rs9818655   | 3 | 3429751   | A                       | 30 | 10 | T         | 0.0006347  |
| rs9814703   | 3 | 3429755   | G                       | 30 | 10 | A         | 0.0006347  |
| rs11915570  | 3 | 3429941   | T                       | 30 | 10 | A         | 0.0006347  |
| rs6771545   | 3 | 3457052   | T                       | 31 | 11 | C         | 0.0008085  |
| rs7636780   | 3 | 3474111   | C                       | 28 | 9  | T         | 0.0008484  |
| rs6786006   | 3 | 3481956   | T                       | 28 | 9  | C         | 0.0008484  |
| rs1396415   | 3 | 3496754   | A                       | 25 | 7  | G         | 0.0008092  |
| rs142935847 | 3 | 4584368   | G                       | 3  | 17 | GGT       | 0.0007114  |
| rs4685951   | 3 | 5631147   | A                       | 27 | 8  | G         | 0.0006326  |
| rs17658611  | 3 | 6401765   | T                       | 28 | 49 | C         | 0.0008723  |
| rs2217845   | 3 | 6406809   | A                       | 28 | 49 | G         | 0.0008723  |
| rs9820568   | 3 | 7083544   | A                       | 12 | 0  | C         | 0.0003422  |
| rs71055876  | 3 | 11493487  | C                       | 12 | 31 | CTTGGGGGG | 0.0007705  |
| rs2442772   | 3 | 11493926  | A                       | 12 | 32 | G         | 0.0004387  |
| rs2454505   | 3 | 11497325  | C                       | 12 | 32 | T         | 0.0004387  |
| rs2454496   | 3 | 11502552  | T                       | 12 | 31 | G         | 0.0007705  |
| rs884466    | 3 | 13142274  | C                       | 29 | 10 | T         | 0.0009257  |
| rs12495985  | 3 | 13142638  | C                       | 23 | 5  | T         | 0.0003619  |
| rs35220159  | 3 | 13631296  | G                       | 7  | 24 | A         | 0.0006277  |
| rs62232966  | 3 | 13640852  | A                       | 7  | 24 | C         | 0.0006277  |
| 3:15506747  | 3 | 15506747  | ATTTATTTATTTATTTATTTA   | 16 | 0  | A         | 0.00001575 |
| rs150826285 | 3 | 26036390  | A                       | 0  | 10 | C         | 0.0005917  |
| rs140189968 | 3 | 26036393  | G                       | 0  | 10 | C         | 0.0005917  |
| rs7666691   | 3 | 26048549  | T                       | 0  | 10 | C         | 0.0005917  |
| rs75969402  | 3 | 26119136  | A                       | 0  | 10 | G         | 0.0005917  |

|             |   |             |    |        |           |
|-------------|---|-------------|----|--------|-----------|
| rs2290533   | 3 | 31789724 T  | 52 | 28 C   | 0.0009847 |
| rs4955112   | 3 | 31791851 T  | 52 | 28 G   | 0.0009847 |
| rs78884871  | 3 | 32239143 A  | 8  | 25 G   | 0.000871  |
| rs342539    | 3 | 42510528 A  | 6  | 23 G   | 0.0004533 |
| rs34544831  | 3 | 43204651 C  | 0  | 10 CTT | 0.0005917 |
| rs2234358   | 3 | 45989044 T  | 33 | 54 G   | 0.0009764 |
| rs1994489   | 3 | 45993226 G  | 33 | 54 C   | 0.0009764 |
| rs4682799   | 3 | 45993606 T  | 33 | 54 C   | 0.0009764 |
| rs9311380   | 3 | 45996047 T  | 33 | 54 C   | 0.0009764 |
| rs6441936   | 3 | 45997822 A  | 33 | 54 T   | 0.0009764 |
| rs4682800   | 3 | 46002005 A  | 33 | 54 C   | 0.0009764 |
| rs1601867   | 3 | 46002962 T  | 34 | 55 C   | 0.0009818 |
| rs3733100   | 3 | 46009864 C  | 30 | 51 G   | 0.0009286 |
| 3:53554931  | 3 | 53554931 C  | 4  | 18 CT  | 0.0009855 |
| rs979220    | 3 | 53556223 C  | 34 | 11 T   | 0.0001478 |
| rs12629517  | 3 | 53561686 G  | 57 | 32 A   | 0.0006468 |
| rs35555534  | 3 | 53562519 C  | 25 | 6 T    | 0.0003059 |
| rs6777794   | 3 | 53562586 G  | 57 | 32 T   | 0.0006468 |
| rs6777870   | 3 | 53562602 C  | 57 | 32 T   | 0.0006468 |
| rs35306382  | 3 | 53579944 A  | 26 | 7 C    | 0.0004518 |
| rs13100574  | 3 | 53596184 G  | 26 | 7 A    | 0.0004518 |
| rs61158509  | 3 | 60128998 T  | 8  | 25 C   | 0.000871  |
| rs35022605  | 3 | 60130882 A  | 14 | 33 AT  | 0.0007122 |
| rs62240253  | 3 | 60132040 T  | 14 | 33 C   | 0.0007122 |
| rs12632865  | 3 | 60132390 T  | 14 | 33 C   | 0.0007122 |
| rs785159    | 3 | 62296870 G  | 8  | 25 T   | 0.000871  |
| rs2371863   | 3 | 65099625 A  | 43 | 19 G   | 0.0005165 |
| rs13078431  | 3 | 65103351 A  | 44 | 20 G   | 0.0005739 |
| rs17403692  | 3 | 65104083 T  | 44 | 20 C   | 0.0005739 |
| rs150930606 | 3 | 65108257 T  | 44 | 20 C   | 0.0005739 |
| rs35642529  | 3 | 65108915 GA | 44 | 20 G   | 0.0005739 |
| rs28880106  | 3 | 65109051 T  | 44 | 20 C   | 0.0005739 |
| rs148294188 | 3 | 65109486 C  | 44 | 20 G   | 0.0005739 |
| 3:65110228  | 3 | 65110228 C  | 43 | 20 T   | 0.0009741 |
| rs36159406  | 3 | 65110301 C  | 44 | 20 A   | 0.0005739 |
| rs13093312  | 3 | 65110712 G  | 44 | 20 A   | 0.0005739 |
| rs13100314  | 3 | 65112021 A  | 44 | 20 G   | 0.0005739 |
| rs13100221  | 3 | 65112138 G  | 44 | 20 C   | 0.0005739 |
| rs1482607   | 3 | 65113730 C  | 44 | 20 T   | 0.0005739 |
| rs2012632   | 3 | 65119822 T  | 44 | 20 C   | 0.0005739 |

|             |   |          |   |    |    |           |            |
|-------------|---|----------|---|----|----|-----------|------------|
| rs7636917   | 3 | 65123765 | G | 31 | 54 | A         | 0.0003134  |
| rs35471759  | 3 | 65184649 | A | 42 | 19 | T         | 0.0008809  |
| rs4855329   | 3 | 68353494 | T | 8  | 25 | C         | 0.000871   |
| rs4345072   | 3 | 68353956 | C | 7  | 25 | A         | 0.0003419  |
| rs6549115   | 3 | 68355872 | A | 7  | 25 | T         | 0.0003419  |
| rs9822608   | 3 | 68357852 | T | 7  | 25 | G         | 0.0003419  |
| rs57935782  | 3 | 68360456 | T | 7  | 25 | TGTCATATA | 0.0003419  |
| rs59158231  | 3 | 68360460 | A | 7  | 25 | ACGTT     | 0.0003419  |
| rs2131042   | 3 | 68361179 | G | 7  | 25 | A         | 0.0003419  |
| rs4378971   | 3 | 68363844 | A | 7  | 25 | T         | 0.0003419  |
| rs10155009  | 3 | 68368649 | G | 9  | 29 | A         | 0.0001986  |
| rs1491757   | 3 | 68369111 | G | 9  | 29 | T         | 0.0001986  |
| rs1491756   | 3 | 68369288 | G | 10 | 29 | A         | 0.0004811  |
| rs1491755   | 3 | 68369391 | G | 10 | 29 | A         | 0.0004811  |
| rs1552710   | 3 | 68386395 | A | 24 | 45 | G         | 0.0007128  |
| rs1552711   | 3 | 68386397 | G | 24 | 45 | C         | 0.0007128  |
| rs2220668   | 3 | 68388269 | A | 30 | 51 | G         | 0.0009286  |
| rs1388500   | 3 | 68388365 | G | 29 | 51 | C         | 0.0005253  |
| rs7613895   | 3 | 68389846 | C | 29 | 51 | G         | 0.0005253  |
| rs262207    | 3 | 68390354 | G | 33 | 54 | T         | 0.0009764  |
| rs262209    | 3 | 68390763 | G | 33 | 54 | T         | 0.0009764  |
| rs262210    | 3 | 68391629 | T | 33 | 54 | G         | 0.0009764  |
| rs262211    | 3 | 68391836 | C | 33 | 54 | G         | 0.0009764  |
| rs262212    | 3 | 68393055 | G | 29 | 51 | A         | 0.0005253  |
| rs262214    | 3 | 68393442 | A | 29 | 51 | T         | 0.0005253  |
| rs262215    | 3 | 68393781 | G | 30 | 51 | T         | 0.0009286  |
| rs262250    | 3 | 68403593 | C | 29 | 50 | G         | 0.0009027  |
| rs262248    | 3 | 68405259 | T | 30 | 52 | C         | 0.00054    |
| rs2220667   | 3 | 68419898 | G | 18 | 3  | C         | 0.0007671  |
| rs171892    | 3 | 68430620 | C | 29 | 53 | T         | 0.0001666  |
| rs58640476  | 3 | 68433974 | A | 19 | 3  | ACTTT     | 0.0004265  |
| rs115620664 | 3 | 68441708 | G | 25 | 46 | A         | 0.0007575  |
| rs17831048  | 3 | 68475353 | C | 43 | 18 | T         | 0.0002635  |
| rs113071699 | 3 | 70386328 | T | 41 | 17 | TTAA      | 0.0004047  |
| rs112187311 | 3 | 74102537 | A | 18 | 39 | G         | 0.0004141  |
| rs77764654  | 3 | 79732148 | G | 28 | 8  | A         | 0.0003544  |
| rs76623516  | 3 | 79732914 | T | 28 | 8  | G         | 0.0003544  |
| rs78727982  | 3 | 79732986 | G | 28 | 8  | T         | 0.0003544  |
| 3:82897854  | 3 | 82897854 | T | 10 | 29 | TC        | 0.0004811  |
| 3:82897861  | 3 | 82897861 | T | 8  | 29 | TTCTTTC   | 0.00007515 |

|             |                 |    |        |             |
|-------------|-----------------|----|--------|-------------|
| 3:88950094  | 3 88950094 AGAT | 20 | 44 A   | 0.00009139  |
| rs71623597  | 3 98146300 A    | 18 | 39 AAC | 0.0003337   |
| rs6439853   | 3 98153919 C    | 18 | 38 T   | 0.0007166   |
| 3:106522026 | 3 106522026 A   | 18 | 46 T   | 0.000005263 |
| rs9631453   | 3 115394563 C   | 33 | 11 G   | 0.0002645   |
| rs6804592   | 3 115401998 G   | 3  | 17 A   | 0.0007114   |
| rs6777348   | 3 117137202 T   | 27 | 8 C    | 0.0006326   |
| rs4632551   | 3 117148573 C   | 27 | 8 G    | 0.0006326   |
| rs201579536 | 3 118242257 T   | 10 | 28 TG  | 0.000853    |
| rs75752354  | 3 118242263 T   | 10 | 28 A   | 0.000853    |
| rs6438453   | 3 118275310 C   | 6  | 24 A   | 0.0002287   |
| rs6438454   | 3 118275339 C   | 6  | 24 G   | 0.0002287   |
| rs7620329   | 3 118275517 A   | 6  | 24 G   | 0.0002287   |
| rs9814010   | 3 118281297 C   | 6  | 24 T   | 0.0002287   |
| rs4353799   | 3 118283506 T   | 6  | 24 C   | 0.0002287   |
| rs4605536   | 3 118283580 T   | 6  | 24 C   | 0.0002287   |
| rs111854688 | 3 122108236 G   | 22 | 44 A   | 0.0003557   |
| rs13079305  | 3 123953526 T   | 2  | 15 C   | 0.0006243   |
| rs201570082 | 3 140987054 A   | 0  | 11 T   | 0.0002637   |
| rs200964710 | 3 141015446 T   | 20 | 4 C    | 0.0007606   |
| rs75704232  | 3 141016370 C   | 20 | 4 G    | 0.0007606   |
| rs9862069   | 3 141894430 T   | 13 | 33 C   | 0.0005413   |
| rs9289644   | 3 141896979 T   | 13 | 33 C   | 0.0005413   |
| rs6764361   | 3 141898980 C   | 13 | 33 T   | 0.0005413   |
| rs6805279   | 3 141916255 T   | 13 | 33 C   | 0.0005413   |
| rs11927535  | 3 141917185 T   | 13 | 33 C   | 0.0005413   |
| rs9818462   | 3 141986658 C   | 5  | 20 G   | 0.0009659   |
| rs9871394   | 3 141989460 G   | 5  | 20 A   | 0.0009659   |
| rs28729685  | 3 141992387 A   | 5  | 20 T   | 0.0009659   |
| rs275688    | 3 148347114 T   | 11 | 0 A    | 0.0007274   |
| rs275687    | 3 148347582 C   | 11 | 0 A    | 0.0007274   |
| rs275686    | 3 148347714 C   | 11 | 0 G    | 0.0007274   |
| rs275684    | 3 148347952 T   | 11 | 0 C    | 0.0007274   |
| rs275683    | 3 148347959 G   | 11 | 0 A    | 0.0007274   |
| rs649342    | 3 148350663 T   | 11 | 0 A    | 0.0007274   |
| rs444752    | 3 148351096 A   | 11 | 0 C    | 0.0007274   |
| rs413671    | 3 148351517 T   | 11 | 0 A    | 0.0007274   |
| rs387951    | 3 148351790 A   | 11 | 0 G    | 0.0007274   |
| rs375839    | 3 148351839 G   | 11 | 0 A    | 0.0007274   |
| rs201943    | 3 148352362 C   | 11 | 0 T    | 0.0007274   |

|             |                   |    |       |            |
|-------------|-------------------|----|-------|------------|
| rs275695    | 3 148352651 T     | 11 | 0 A   | 0.0007274  |
| rs4058143   | 3 148352896 CAATT | 11 | 0 C   | 0.0007274  |
| rs275696    | 3 148353206 G     | 11 | 0 A   | 0.0007274  |
| rs275697    | 3 148353740 C     | 11 | 0 T   | 0.0007274  |
| rs275698    | 3 148353866 T     | 11 | 0 C   | 0.0007274  |
| rs62269231  | 3 149979842 G     | 8  | 27 T  | 0.0002641  |
| rs13078289  | 3 152530072 T     | 4  | 19 A  | 0.0005969  |
| rs9881146   | 3 152681677 A     | 30 | 51 G  | 0.0009286  |
| rs11712121  | 3 152698743 A     | 1  | 14 G  | 0.0002433  |
| rs1160148   | 3 159156005 G     | 8  | 25 T  | 0.000871   |
| rs1907860   | 3 163546423 A     | 0  | 11 G  | 0.0002715  |
| rs79902688  | 3 163549268 G     | 0  | 11 T  | 0.0002715  |
| rs62293633  | 3 163557077 G     | 0  | 11 C  | 0.0002715  |
| rs36022510  | 3 163557357 G     | 0  | 11 A  | 0.0002715  |
| rs71156808  | 3 163562172 GT    | 0  | 11 G  | 0.0002715  |
| rs62293636  | 3 163563579 C     | 0  | 11 T  | 0.0002715  |
| rs12491031  | 3 163564559 C     | 0  | 11 T  | 0.0002715  |
| rs13059483  | 3 163567068 A     | 0  | 11 C  | 0.0002715  |
| rs13060209  | 3 163567299 C     | 0  | 11 G  | 0.0002715  |
| 3:163568079 | 3 163568079 AAT   | 0  | 11 A  | 0.0002715  |
| rs12489971  | 3 163572245 A     | 0  | 11 C  | 0.0002715  |
| rs2365589   | 3 163572825 G     | 0  | 11 T  | 0.0002715  |
| rs141466002 | 3 163573679 A     | 0  | 11 G  | 0.0002715  |
| rs34247696  | 3 163574006 T     | 0  | 11 G  | 0.0002715  |
| rs71630481  | 3 163574522 C     | 0  | 11 CA | 0.0002715  |
| rs66817151  | 3 163574558 A     | 0  | 11 C  | 0.0002715  |
| rs147941663 | 3 163575270 TTG   | 0  | 11 T  | 0.0002715  |
| rs11412870  | 3 172336474 CA    | 18 | 39 C  | 0.0004141  |
| rs234028    | 3 172338633 G     | 18 | 38 A  | 0.0007166  |
| rs234027    | 3 172339351 G     | 18 | 38 A  | 0.0007166  |
| rs234026    | 3 172340263 T     | 18 | 38 C  | 0.0007166  |
| rs234022    | 3 172342028 G     | 24 | 51 A  | 0.00006488 |
| rs234021    | 3 172342272 A     | 18 | 38 G  | 0.0007166  |
| rs234020    | 3 172342303 C     | 18 | 38 T  | 0.0007166  |
| rs234019    | 3 172342922 A     | 18 | 38 G  | 0.0007166  |
| rs234018    | 3 172344389 A     | 54 | 29 C  | 0.0006016  |
| rs234016    | 3 172347134 G     | 54 | 29 A  | 0.0006016  |
| rs5854477   | 3 172354182 CGAAT | 20 | 41 C  | 0.0005156  |
| rs234007    | 3 172357122 T     | 19 | 39 G  | 0.0007998  |
| rs234005    | 3 172358320 T     | 19 | 39 C  | 0.0007998  |

|             |                    |    |         |             |
|-------------|--------------------|----|---------|-------------|
| rs234004    | 3 172359223 C      | 19 | 39 T    | 0.0007998   |
| rs98106     | 3 172362707 A      | 18 | 39 G    | 0.0004141   |
| rs113829793 | 3 172364153 ATAAAT | 20 | 41 A    | 0.0005156   |
| rs9854527   | 3 174216289 T      | 13 | 32 C    | 0.0009401   |
| rs59036126  | 3 182742406 C      | 1  | 13 CA   | 0.0005601   |
| rs11423070  | 3 182780982 A      | 1  | 13 AG   | 0.0005059   |
| rs11313652  | 3 182788521 CA     | 2  | 16 C    | 0.0002759   |
| rs6802040   | 3 183109397 T      | 30 | 8 G     | 0.0001064   |
| rs9647371   | 3 184284279 T      | 21 | 4 C     | 0.0004069   |
| rs9835850   | 3 184285655 T      | 18 | 3 C     | 0.0008121   |
| rs9860415   | 3 184286171 C      | 18 | 3 T     | 0.0008121   |
| rs7644377   | 3 184295316 T      | 27 | 4 C     | 0.000007245 |
| rs13071695  | 3 187185791 G      | 53 | 28 A    | 0.000519    |
| rs710496    | 3 188699330 G      | 28 | 9 C     | 0.0008484   |
| rs13092581  | 3 188699808 G      | 28 | 8 A     | 0.0003544   |
| 3:190280484 | 3 190280484 CAT    | 24 | 6 C     | 0.0005099   |
| rs200759056 | 3 190280486 T      | 24 | 5 C     | 0.0001934   |
| rs62293019  | 3 192336707 A      | 4  | 19 G    | 0.0005969   |
| rs62293020  | 3 192336826 T      | 4  | 19 G    | 0.0005969   |
| rs62293021  | 3 192338033 A      | 3  | 18 G    | 0.0003675   |
| rs6780484   | 3 194243230 C      | 21 | 4 G     | 0.0004069   |
| rs77618188  | 3 195689376 C      | 0  | 12 T    | 0.0001237   |
| 3:195803487 | 3 195803487 AT     | 1  | 13 A    | 0.0005059   |
| rs4021907   | 3 197570134 A      | 30 | 51 C    | 0.0009286   |
| rs9880944   | 3 197647970 A      | 2  | 15 C    | 0.0006243   |
| rs113481869 | 3 197647973 T      | 2  | 15 C    | 0.0006243   |
| rs111656082 | 3 197647976 G      | 2  | 15 A    | 0.0006243   |
| 3:197876728 | 3 197876728 C      | 3  | 17 T    | 0.0006426   |
| rs4689202   | 4 4175894 G        | 36 | 12 A    | 0.0001705   |
| rs10937668  | 4 5771244 G        | 31 | 52 C    | 0.0009496   |
| rs4688959   | 4 5771262 T        | 31 | 52 C    | 0.0009496   |
| rs4689308   | 4 5771295 G        | 31 | 52 A    | 0.0009496   |
| rs5855887   | 4 5779563 T        | 55 | 30 TTTG | 0.0006201   |
| rs149986545 | 4 5781470 T        | 57 | 31 C    | 0.0003656   |
| rs11464608  | 4 6017245 G        | 9  | 27 GA   | 0.0006689   |
| rs10461053  | 4 6031632 G        | 15 | 36 T    | 0.0002717   |
| rs739778    | 4 7703265 A        | 45 | 20 G    | 0.000332    |
| 4:9033194   | 4 9033194 ACG      | 34 | 10 A    | 0.00004996  |
| 4:9033196   | 4 9033196 G        | 34 | 11 A    | 0.0001478   |
| 4:12151990  | 4 12151990 G       | 28 | 8 GT    | 0.0003544   |



|             |   |          |   |    |    |     |             |
|-------------|---|----------|---|----|----|-----|-------------|
| rs62297928  | 4 | 19171165 | C | 0  | 11 | A   | 0.0002715   |
| rs62297932  | 4 | 19201797 | A | 0  | 11 | G   | 0.0002715   |
| rs58918138  | 4 | 20353473 | T | 1  | 19 | G   | 0.000005333 |
| rs77041696  | 4 | 20358927 | G | 1  | 19 | C   | 0.000005333 |
| rs4552454   | 4 | 20386044 | A | 1  | 19 | C   | 0.000005333 |
| rs10027333  | 4 | 20390198 | G | 1  | 19 | A   | 0.000005333 |
| rs7435615   | 4 | 20399168 | A | 1  | 19 | G   | 0.000005333 |
| rs10006234  | 4 | 20408421 | G | 16 | 38 | T   | 0.0009291   |
| rs57411082  | 4 | 20408564 | C | 1  | 19 | CTG | 0.000005333 |
| rs10026931  | 4 | 20430582 | G | 1  | 18 | C   | 0.00001169  |
| rs11728803  | 4 | 20851589 | T | 4  | 19 | C   | 0.0005969   |
| rs71940315  | 4 | 20865321 | C | 4  | 19 | CTT | 0.0005969   |
| rs12498200  | 4 | 25052381 | G | 22 | 47 | A   | 0.00006058  |
| rs759245    | 4 | 25058232 | G | 27 | 49 | A   | 0.0004874   |
| rs759244    | 4 | 25058323 | A | 27 | 49 | T   | 0.0004874   |
| rs6821216   | 4 | 25058776 | G | 27 | 49 | C   | 0.0004874   |
| rs6835786   | 4 | 25061194 | A | 27 | 49 | C   | 0.0004874   |
| rs7672992   | 4 | 25613341 | C | 31 | 56 | T   | 0.0001617   |
| rs11096924  | 4 | 38151366 | A | 43 | 20 | G   | 0.0009741   |
| rs147312727 | 4 | 38245334 | G | 48 | 24 | GGT | 0.000451    |
| rs62295295  | 4 | 38245657 | G | 51 | 26 | A   | 0.0005284   |
| rs73243338  | 4 | 38245785 | T | 49 | 23 | C   | 0.0002495   |
| rs112873879 | 4 | 38246039 | C | 51 | 26 | T   | 0.0005284   |
| rs16994359  | 4 | 38246265 | T | 51 | 26 | C   | 0.0005284   |
| rs62295298  | 4 | 38246414 | T | 51 | 27 | C   | 0.0009437   |
| rs4832756   | 4 | 38246943 | A | 33 | 55 | T   | 0.0005652   |
| 4:47142112  | 4 | 47142112 | A | 25 | 50 | C   | 0.00007604  |
| 4:49209131  | 4 | 49209131 | C | 24 | 6  | T   | 0.0005592   |
| rs2616434   | 4 | 54616649 | G | 55 | 29 | A   | 0.000347    |
| rs2616433   | 4 | 54617199 | A | 54 | 29 | C   | 0.0006016   |
| rs5858236   | 4 | 54617655 | C | 52 | 28 | CA  | 0.0009847   |
| rs2616431   | 4 | 54618315 | C | 54 | 29 | G   | 0.0006016   |
| rs2590807   | 4 | 54621567 | A | 55 | 29 | T   | 0.000347    |
| rs6826915   | 4 | 54622017 | A | 55 | 29 | G   | 0.000347    |
| rs62303692  | 4 | 56311447 | T | 19 | 39 | C   | 0.0007998   |
| rs17218035  | 4 | 58930432 | G | 56 | 31 | A   | 0.0006352   |
| rs270231    | 4 | 58932326 | C | 58 | 31 | T   | 0.0002058   |
| rs1605463   | 4 | 58934608 | G | 34 | 55 | A   | 0.0009818   |
| rs62305808  | 4 | 60515628 | A | 11 | 32 | C   | 0.000192    |
| rs7676888   | 4 | 62164761 | G | 41 | 18 | A   | 0.0007885   |

|             |   |           |     |    |    |             |             |
|-------------|---|-----------|-----|----|----|-------------|-------------|
| rs2342454   | 4 | 62167519  | G   | 41 | 18 | A           | 0.0007885   |
| rs200738201 | 4 | 64476893  | T   | 31 | 53 | A           | 0.0005517   |
| 4:66104499  | 4 | 66104499  | CAT | 11 | 0  | C           | 0.0007274   |
| rs1220858   | 4 | 70805831  | T   | 49 | 21 | A           | 0.00006416  |
| rs75408729  | 4 | 77039736  | T   | 6  | 22 | G           | 0.0008352   |
| rs6835713   | 4 | 78168932  | T   | 32 | 53 | G           | 0.0009656   |
| 4:82709303  | 4 | 82709303  | G   | 12 | 0  | GTATATATACA | 0.0003567   |
| rs72659283  | 4 | 84907590  | T   | 15 | 1  | C           | 0.0003131   |
| rs2135284   | 4 | 84908159  | G   | 15 | 1  | A           | 0.0003131   |
| rs72659284  | 4 | 84910400  | G   | 15 | 1  | A           | 0.0003131   |
| rs72659286  | 4 | 84916214  | G   | 15 | 1  | T           | 0.0003131   |
| rs72659290  | 4 | 84917345  | C   | 14 | 1  | T           | 0.0006347   |
| rs72659295  | 4 | 84934184  | A   | 15 | 1  | G           | 0.0003131   |
| rs74476563  | 4 | 84935594  | GT  | 15 | 1  | G           | 0.0003131   |
| rs72659296  | 4 | 84936325  | T   | 15 | 1  | G           | 0.0003131   |
| rs72659297  | 4 | 84938960  | C   | 15 | 1  | G           | 0.0003131   |
| rs4129091   | 4 | 84941953  | A   | 15 | 1  | G           | 0.0003131   |
| rs113134562 | 4 | 84951643  | T   | 15 | 1  | C           | 0.0003131   |
| rs17007881  | 4 | 84953207  | G   | 17 | 1  | A           | 0.00007397  |
| rs1921883   | 4 | 84953383  | C   | 17 | 1  | T           | 0.00007397  |
| rs72660815  | 4 | 84954205  | G   | 17 | 1  | T           | 0.00007397  |
| rs72660816  | 4 | 84954602  | C   | 17 | 1  | A           | 0.00007397  |
| rs72660817  | 4 | 84955535  | G   | 17 | 1  | A           | 0.00007397  |
| rs72660819  | 4 | 84956002  | C   | 17 | 1  | A           | 0.00007397  |
| rs1317020   | 4 | 84956277  | T   | 17 | 1  | C           | 0.00007397  |
| rs56004187  | 4 | 84956736  | C   | 17 | 1  | T           | 0.00007397  |
| rs1921880   | 4 | 84957198  | T   | 17 | 1  | G           | 0.00007397  |
| rs1317519   | 4 | 84957652  | T   | 17 | 1  | C           | 0.00007397  |
| rs2091745   | 4 | 84961080  | G   | 28 | 9  | A           | 0.0008484   |
| rs72660826  | 4 | 84965875  | G   | 17 | 2  | A           | 0.0004014   |
| rs62306398  | 4 | 90055581  | T   | 29 | 9  | C           | 0.0004831   |
| rs713175    | 4 | 90073235  | T   | 28 | 9  | G           | 0.0008484   |
| rs62304660  | 4 | 90077751  | C   | 28 | 8  | T           | 0.0003544   |
| rs13127840  | 4 | 90078734  | A   | 28 | 9  | T           | 0.0008484   |
| rs756004    | 4 | 90164712  | G   | 20 | 40 | C           | 0.0008835   |
| rs1160489   | 4 | 99773191  | T   | 14 | 1  | G           | 0.0006347   |
| rs6851731   | 4 | 101248226 | A   | 49 | 25 | G           | 0.00085     |
| rs11420114  | 4 | 102025611 | AT  | 17 | 36 | A           | 0.0008922   |
| 4:109041155 | 4 | 109041155 | T   | 8  | 33 | G           | 0.000005054 |
| rs441216    | 4 | 119630402 | A   | 24 | 6  | G           | 0.0005592   |

|             |                   |    |          |            |
|-------------|-------------------|----|----------|------------|
| 4:119987369 | 4 119987369 G     | 28 | 9 A      | 0.0008484  |
| rs111866828 | 4 120124537 A     | 19 | 3 G      | 0.0004265  |
| rs9997559   | 4 123785086 G     | 25 | 6 A      | 0.0003059  |
| rs7674648   | 4 123785314 C     | 25 | 6 T      | 0.0003059  |
| rs10000779  | 4 123786114 G     | 25 | 6 A      | 0.0003059  |
| rs10023647  | 4 123786531 T     | 25 | 6 C      | 0.0003059  |
| rs72672991  | 4 123787692 T     | 25 | 6 G      | 0.0003059  |
| rs9996546   | 4 123788027 C     | 25 | 6 T      | 0.0003059  |
| rs7694627   | 4 123788495 C     | 25 | 6 T      | 0.0003059  |
| rs7670829   | 4 123788691 C     | 25 | 6 G      | 0.0003059  |
| rs6817113   | 4 123790067 C     | 25 | 6 T      | 0.0003059  |
| rs13435300  | 4 123791710 G     | 25 | 6 A      | 0.0003059  |
| rs28449370  | 4 123792219 T     | 25 | 6 C      | 0.0003059  |
| rs45585532  | 4 123792343 CTGTT | 25 | 6 C      | 0.0003059  |
| rs10012814  | 4 123795337 T     | 25 | 6 A      | 0.0003059  |
| rs9990554   | 4 123795408 A     | 25 | 6 G      | 0.0003059  |
| rs3804155   | 4 123795653 G     | 25 | 6 A      | 0.0003059  |
| rs45565835  | 4 123796735 G     | 25 | 6 A      | 0.0003059  |
| rs7700205   | 4 123798183 T     | 25 | 6 C      | 0.0003059  |
| rs17474021  | 4 123798711 C     | 25 | 6 T      | 0.0003059  |
| rs41537948  | 4 123799325 G     | 25 | 6 A      | 0.0003059  |
| rs34350503  | 4 123827911 A     | 35 | 11 G     | 0.00008135 |
| rs12513181  | 4 123835656 C     | 35 | 11 A     | 0.00008135 |
| rs12648093  | 4 123838758 A     | 35 | 11 G     | 0.00008135 |
| rs62325775  | 4 123947268 A     | 27 | 8 G      | 0.0006326  |
| rs13142857  | 4 124054093 G     | 30 | 10 A     | 0.0006347  |
| rs304653    | 4 124080712 C     | 30 | 10 T     | 0.0006347  |
| rs376830774 | 4 124487236 A     | 46 | 21 ATCTG | 0.0003668  |
| 4:146615412 | 4 146615412 A     | 12 | 0 G      | 0.0003368  |
| rs6419330   | 4 146675915 C     | 14 | 33 T     | 0.0007122  |
| rs70949643  | 4 154070887 GA    | 6  | 21 G     | 0.0007337  |
| rs12504642  | 4 154091900 A     | 16 | 39 G     | 0.00009784 |
| rs6535901   | 4 154093408 C     | 33 | 54 T     | 0.0009764  |
| rs6820726   | 4 154093464 T     | 33 | 55 C     | 0.0005652  |
| rs10023596  | 4 154094001 G     | 34 | 55 A     | 0.0009818  |
| rs11099874  | 4 154094107 C     | 33 | 55 G     | 0.0005652  |
| rs11099875  | 4 154094109 C     | 33 | 55 G     | 0.0005652  |
| rs11099876  | 4 154094235 G     | 33 | 55 C     | 0.0005652  |
| rs10002011  | 4 154094675 A     | 32 | 55 G     | 0.0003175  |
| rs10001881  | 4 154094682 T     | 32 | 55 C     | 0.0003175  |

|             |                     |    |                     |            |
|-------------|---------------------|----|---------------------|------------|
| rs7671132   | 4 154094793 T       | 33 | 55 C                | 0.0005652  |
| rs7696186   | 4 154095073 C       | 33 | 55 T                | 0.0005652  |
| rs142792673 | 4 154096164 GTTTTGT | 56 | 30 G                | 0.0001481  |
| rs4145338   | 4 154654323 C       | 11 | 0 T                 | 0.0007274  |
| rs10434139  | 4 154654665 A       | 11 | 0 G                 | 0.0007274  |
| rs56256921  | 4 154655929 A       | 11 | 0 G                 | 0.0007274  |
| rs11931479  | 4 154664523 G       | 11 | 0 A                 | 0.0007274  |
| rs17030417  | 4 154670813 G       | 11 | 0 A                 | 0.0007274  |
| rs11946635  | 4 154674080 A       | 11 | 0 G                 | 0.0007274  |
| rs11946638  | 4 154674095 T       | 11 | 0 G                 | 0.0007274  |
| 4:155246473 | 4 155246473 A       | 6  | 23 G                | 0.000429   |
| rs71605285  | 4 157055724 G       | 37 | 13 C                | 0.0002102  |
| 4:161072770 | 4 161072770 G       | 9  | 27 A                | 0.000654   |
| rs145598110 | 4 161077302 C       | 12 | 32 T                | 0.0004387  |
| rs115431006 | 4 161077729 T       | 12 | 32 C                | 0.0004387  |
| rs2349527   | 4 161078051 A       | 12 | 32 T                | 0.0004387  |
| rs2882184   | 4 161078069 A       | 12 | 32 G                | 0.0004387  |
| rs2349529   | 4 161078136 A       | 12 | 32 G                | 0.0004387  |
| rs2349530   | 4 161078142 T       | 12 | 32 G                | 0.0004387  |
| rs55675443  | 4 161078540 A       | 12 | 32 C                | 0.0004387  |
| rs1573797   | 4 161078915 A       | 12 | 32 T                | 0.0004387  |
| rs1573795   | 4 161079052 A       | 12 | 32 G                | 0.0004387  |
| rs2349533   | 4 161079172 C       | 12 | 32 A                | 0.0004387  |
| rs6852275   | 4 161079345 A       | 12 | 32 G                | 0.0004387  |
| rs1882685   | 4 161080394 A       | 12 | 32 G                | 0.0004387  |
| rs4519753   | 4 161080636 T       | 12 | 32 C                | 0.0004387  |
| rs28557270  | 4 161080971 C       | 12 | 32 T                | 0.0004387  |
| rs28880970  | 4 161081088 G       | 12 | 32 A                | 0.0004387  |
| rs3905353   | 4 161082121 C       | 12 | 32 G                | 0.0004387  |
| rs1579025   | 4 161082372 G       | 12 | 32 C                | 0.0004387  |
| rs55803229  | 4 161084958 G       | 12 | 32 C                | 0.0004387  |
| rs72691371  | 4 161092040 C       | 12 | 32 G                | 0.0004387  |
| 4:163515735 | 4 163515735 A       | 3  | 22 AAATAAATAAATAAAT | 0.00001976 |
| rs9995462   | 4 163515736 T       | 5  | 25 A                | 0.00003701 |
| rs62355242  | 4 167715106 A       | 24 | 6 T                 | 0.0005592  |
| rs901236    | 4 172740734 T       | 21 | 43 G                | 0.0003256  |
| rs4396959   | 4 172743234 G       | 34 | 55 A                | 0.0009818  |
| rs346100    | 4 179603662 G       | 44 | 18 A                | 0.0001482  |
| rs2378925   | 4 179608265 G       | 45 | 21 A                | 0.0006315  |
| rs118806    | 4 179609480 G       | 44 | 18 A                | 0.0001482  |

|             |                  |    |             |            |
|-------------|------------------|----|-------------|------------|
| rs382249    | 4 179610406 G    | 44 | 18 T        | 0.0001482  |
| rs393318    | 4 179611902 C    | 43 | 20 T        | 0.0009741  |
| rs427796    | 4 179612525 A    | 43 | 20 C        | 0.0009741  |
| rs10033023  | 4 179613705 T    | 42 | 17 C        | 0.0002305  |
| 4:181184074 | 4 181184074 AC   | 24 | 5 A         | 0.0002188  |
| rs17834666  | 4 181229200 A    | 21 | 4 G         | 0.0004069  |
| rs58393532  | 4 181232190 G    | 21 | 42 GT       | 0.000319   |
| rs73869758  | 4 181234993 T    | 21 | 4 C         | 0.0004069  |
| rs150126595 | 4 181246227 G    | 28 | 8 GT        | 0.0003544  |
| 4:184660581 | 4 184660581 TCAC | 11 | 30 T        | 0.0006171  |
| 4:184660582 | 4 184660582 T    | 11 | 30 G        | 0.0006171  |
| rs11282148  | 4 187992506 T    | 2  | 17 TTTCTTCC | 0.0001534  |
| rs75794090  | 4 187992531 C    | 1  | 16 T        | 0.00005445 |
| rs78869334  | 4 187992532 C    | 1  | 16 T        | 0.00005445 |
| rs6822725   | 4 187992812 C    | 4  | 21 T        | 0.0001601  |
| rs4323164   | 4 187996662 A    | 7  | 25 G        | 0.0003419  |
| rs13141650  | 4 187999052 C    | 8  | 25 T        | 0.000871   |
| rs7662795   | 4 188004538 A    | 8  | 25 C        | 0.000871   |
| rs2029256   | 4 188006491 G    | 8  | 25 A        | 0.000871   |
| rs7679189   | 4 188008668 A    | 8  | 25 T        | 0.000871   |
| rs11936290  | 4 188010829 T    | 9  | 27 C        | 0.000654   |
| rs11936363  | 4 188010846 A    | 9  | 27 G        | 0.000654   |
| rs35927269  | 4 188010890 T    | 9  | 27 TTG      | 0.000654   |
| rs4862765   | 4 188011453 C    | 9  | 27 T        | 0.000654   |
| rs4862766   | 4 188011455 T    | 9  | 27 C        | 0.000654   |
| rs28520426  | 4 188011697 G    | 9  | 27 T        | 0.000654   |
| rs28495215  | 4 188011891 G    | 9  | 27 T        | 0.000654   |
| rs57534287  | 4 188012649 C    | 9  | 27 G        | 0.000654   |
| rs10625579  | 4 188012913 CAAT | 9  | 27 C        | 0.000654   |
| rs4862767   | 4 188012991 C    | 9  | 27 T        | 0.000654   |
| rs4862768   | 4 188013024 G    | 9  | 27 A        | 0.000654   |
| rs11332958  | 4 188013035 A    | 9  | 27 AG       | 0.000654   |
| rs10013620  | 4 188013428 T    | 9  | 27 C        | 0.000654   |
| rs7687788   | 4 188013656 T    | 9  | 27 G        | 0.000654   |
| rs7665787   | 4 188013721 C    | 9  | 27 T        | 0.000654   |
| rs6553035   | 4 188014134 G    | 9  | 27 A        | 0.000654   |
| rs1994430   | 4 188016649 T    | 9  | 27 A        | 0.000654   |
| rs62353542  | 4 188704488 A    | 36 | 14 G        | 0.0007756  |
| rs62353544  | 4 188706790 T    | 36 | 14 G        | 0.0007756  |
| rs7696678   | 4 189015024 T    | 21 | 41 C        | 0.0009669  |

|             |                |    |                        |            |
|-------------|----------------|----|------------------------|------------|
| 4:189191970 | 4 189191970 AG | 24 | 6 A                    | 0.0005592  |
| rs62340474  | 4 189975229 T  | 5  | 21 C                   | 0.0005184  |
| rs34465723  | 4 190008501 A  | 48 | 24 G                   | 0.0007984  |
| rs2101911   | 4 190009975 T  | 48 | 24 C                   | 0.0007984  |
| rs11132604  | 4 190010157 C  | 31 | 52 T                   | 0.0009496  |
| rs1566102   | 4 190025016 G  | 21 | 41 T                   | 0.0009669  |
| rs200541588 | 4 190861229 G  | 13 | 32 T                   | 0.0009401  |
| rs113183696 | 4 190861231 A  | 15 | 34 C                   | 0.0008313  |
| rs4246755   | 5 2078006 T    | 30 | 51 G                   | 0.0009286  |
| rs16868033  | 5 2335750 G    | 20 | 4 C                    | 0.0007606  |
| rs469381    | 5 2344502 T    | 18 | 3 C                    | 0.0008121  |
| rs465950    | 5 2354762 C    | 20 | 4 T                    | 0.0007606  |
| rs460672    | 5 2355032 G    | 20 | 3 C                    | 0.0002211  |
| rs462906    | 5 2355389 T    | 19 | 3 C                    | 0.0004265  |
| rs458006    | 5 2355587 A    | 18 | 3 C                    | 0.0008121  |
| rs113602711 | 5 2355658 T    | 19 | 3 TATGCTAATGTCAGAAAGAG | 0.0004265  |
| rs58937979  | 5 2355682 T    | 19 | 3 C                    | 0.0004265  |
| rs2641215   | 5 2355878 T    | 19 | 3 G                    | 0.0004265  |
| rs456732    | 5 2358645 G    | 19 | 3 A                    | 0.0004265  |
| rs465527    | 5 2359450 A    | 16 | 2 G                    | 0.0007845  |
| rs2628160   | 5 2361180 T    | 16 | 2 G                    | 0.0007845  |
| rs72180957  | 5 3067375 C    | 50 | 25 CTT                 | 0.000499   |
| rs1173180   | 5 4803992 G    | 52 | 28 C                   | 0.0009847  |
| rs13164733  | 5 9893560 T    | 31 | 52 G                   | 0.0009496  |
| rs27478     | 5 13168261 G   | 20 | 40 A                   | 0.0008835  |
| rs39963     | 5 13182557 T   | 16 | 37 G                   | 0.0003171  |
| rs32540     | 5 13184160 T   | 23 | 46 C                   | 0.0002182  |
| rs27481     | 5 13185887 A   | 27 | 53 C                   | 0.00004506 |
| rs28013     | 5 13186559 C   | 16 | 37 T                   | 0.0003171  |
| rs26228     | 5 13188629 G   | 16 | 37 C                   | 0.0003171  |
| rs26226     | 5 13189555 C   | 27 | 53 G                   | 0.00004506 |
| rs26225     | 5 13191338 A   | 23 | 46 C                   | 0.0002182  |
| rs27763     | 5 13192570 T   | 16 | 37 G                   | 0.0003171  |
| rs2067324   | 5 13193768 A   | 17 | 37 AATC                | 0.0006349  |
| rs28023     | 5 13194952 C   | 16 | 37 T                   | 0.0003171  |
| rs32545     | 5 13205011 A   | 17 | 37 G                   | 0.0006349  |
| rs32547     | 5 13207696 G   | 16 | 37 A                   | 0.0003171  |
| rs250545    | 5 13210834 C   | 23 | 46 A                   | 0.0002182  |
| rs32521     | 5 13215417 A   | 16 | 37 G                   | 0.0003171  |
| rs26223     | 5 13225937 C   | 16 | 37 A                   | 0.0003171  |

|             |   |          |       |    |    |         |            |
|-------------|---|----------|-------|----|----|---------|------------|
| rs27488     | 5 | 13227153 | C     | 16 | 37 | T       | 0.0003171  |
| rs26221     | 5 | 13227610 | G     | 20 | 44 | T       | 0.00009139 |
| rs26220     | 5 | 13228033 | C     | 16 | 37 | G       | 0.0003171  |
| rs113858514 | 5 | 13228691 | AATAT | 17 | 37 | A       | 0.0006349  |
| rs32523     | 5 | 13229322 | G     | 17 | 37 | C       | 0.0006349  |
| rs32524     | 5 | 13229435 | A     | 16 | 37 | G       | 0.0003171  |
| rs28186     | 5 | 13229659 | C     | 17 | 37 | T       | 0.0006349  |
| rs250547    | 5 | 13230263 | A     | 17 | 38 | G       | 0.0003648  |
| rs250546    | 5 | 13230705 | T     | 16 | 37 | G       | 0.0003171  |
| rs13162652  | 5 | 13232017 | C     | 16 | 37 | T       | 0.0003171  |
| rs962673    | 5 | 13235570 | T     | 16 | 37 | C       | 0.0003171  |
| rs962674    | 5 | 13235825 | T     | 16 | 37 | C       | 0.0003171  |
| rs962675    | 5 | 13235909 | A     | 16 | 37 | G       | 0.0003171  |
| rs1596773   | 5 | 13236478 | G     | 16 | 37 | A       | 0.0003171  |
| rs2197494   | 5 | 13236709 | A     | 16 | 37 | G       | 0.0003171  |
| rs2197495   | 5 | 13236731 | T     | 16 | 37 | C       | 0.0003171  |
| rs12173099  | 5 | 13240427 | T     | 16 | 37 | C       | 0.0003171  |
| rs12173100  | 5 | 13240611 | A     | 16 | 37 | C       | 0.0003171  |
| rs10066447  | 5 | 13242974 | T     | 19 | 39 | C       | 0.0007998  |
| rs62341417  | 5 | 13244274 | T     | 17 | 37 | C       | 0.0006349  |
| rs11948770  | 5 | 13246336 | C     | 16 | 37 | T       | 0.0003171  |
| rs13163485  | 5 | 13249488 | A     | 27 | 52 | G       | 0.00008446 |
| 5:13249768  | 5 | 13249768 | TA    | 17 | 37 | T       | 0.0006349  |
| rs200425009 | 5 | 13249770 | A     | 17 | 37 | AT      | 0.0006349  |
| rs139530285 | 5 | 13249773 | G     | 17 | 37 | GATAACT | 0.0006349  |
| rs13164139  | 5 | 13249816 | C     | 27 | 52 | T       | 0.00008446 |
| rs4292447   | 5 | 13251163 | C     | 17 | 37 | G       | 0.0006349  |
| rs11748417  | 5 | 13252122 | A     | 17 | 37 | G       | 0.0006349  |
| rs36036547  | 5 | 13252567 | G     | 17 | 37 | A       | 0.0006349  |
| rs34482579  | 5 | 13252592 | T     | 17 | 37 | A       | 0.0006349  |
| rs12522258  | 5 | 13252798 | C     | 27 | 52 | A       | 0.00008446 |
| rs10045395  | 5 | 13253744 | T     | 17 | 37 | C       | 0.0006349  |
| rs7737522   | 5 | 13254339 | C     | 27 | 52 | T       | 0.00008446 |
| rs4077925   | 5 | 13261898 | G     | 17 | 37 | C       | 0.0006349  |
| rs4077927   | 5 | 13262146 | A     | 17 | 37 | G       | 0.0006349  |
| rs6874976   | 5 | 13263052 | A     | 27 | 52 | G       | 0.00008446 |
| rs34774752  | 5 | 13263229 | C     | 27 | 52 | CT      | 0.00008446 |
| rs13173139  | 5 | 13264123 | G     | 17 | 37 | A       | 0.0006349  |
| rs62339660  | 5 | 13265236 | G     | 27 | 52 | A       | 0.00008446 |
| rs62339661  | 5 | 13265254 | G     | 27 | 52 | A       | 0.00008446 |

|            |   |                                |    |                           |            |
|------------|---|--------------------------------|----|---------------------------|------------|
| 5:13265449 | 5 | 13265449 A                     | 31 | 54 ACG                    | 0.0001341  |
| rs79357435 | 5 | 13265572 C                     | 17 | 37 T                      | 0.0006349  |
| rs36165772 | 5 | 13266309 A                     | 28 | 52 G                      | 0.0002748  |
| rs55706056 | 5 | 13266798 C                     | 17 | 37 T                      | 0.0006349  |
| rs4626338  | 5 | 13267566 T                     | 17 | 37 C                      | 0.0006349  |
| rs4476721  | 5 | 13269157 T                     | 17 | 37 C                      | 0.0006349  |
| rs7729579  | 5 | 13271019 A                     | 27 | 52 G                      | 0.00008446 |
| rs6861775  | 5 | 13273222 A                     | 27 | 52 G                      | 0.00008446 |
| rs11739128 | 5 | 13273470 G                     | 17 | 37 A                      | 0.0006349  |
| rs4377703  | 5 | 13274310 T                     | 28 | 52 C                      | 0.0001612  |
| rs7713535  | 5 | 13275208 A                     | 27 | 52 G                      | 0.00008446 |
| rs62339663 | 5 | 13276050 C                     | 27 | 52 T                      | 0.00008446 |
| rs6859654  | 5 | 13277990 A                     | 24 | 50 G                      | 0.00003799 |
| rs6859695  | 5 | 13278059 A                     | 27 | 52 C                      | 0.00008446 |
| rs13153960 | 5 | 13278199 T                     | 17 | 37 C                      | 0.0006349  |
| rs35651716 | 5 | 13278400 C                     | 17 | 37 G                      | 0.0006349  |
| rs13189083 | 5 | 13280592 T                     | 27 | 52 C                      | 0.00008446 |
| rs13169762 | 5 | 13281103 G                     | 17 | 37 A                      | 0.0006349  |
| rs4235626  | 5 | 13281305 T                     | 27 | 52 C                      | 0.00008446 |
| rs11133733 | 5 | 13290183 T                     | 26 | 48 A                      | 0.0004647  |
| rs12187447 | 5 | 13295099 C                     | 26 | 48 T                      | 0.0004647  |
| rs11747612 | 5 | 13305637 C                     | 27 | 48 T                      | 0.0008377  |
| 5:13309772 | 5 | 13309772 C                     | 17 | 35 CGTGTATATACACGTGTATATA | 0.0009157  |
| rs1470469  | 5 | 13317993 C                     | 26 | 48 A                      | 0.0004647  |
| rs1446057  | 5 | 13318740 C                     | 27 | 48 T                      | 0.0008377  |
| rs2166397  | 5 | 13329402 C                     | 26 | 48 T                      | 0.0004647  |
| 5:13330005 | 5 | 13330005 AACATGTAATATTTTATATAI | 26 | 48 A                      | 0.0004647  |
| rs1530514  | 5 | 13332031 C                     | 26 | 48 T                      | 0.0004647  |
| rs4702930  | 5 | 13332729 C                     | 26 | 48 A                      | 0.0004647  |
| rs11133742 | 5 | 13334744 T                     | 27 | 49 C                      | 0.0002589  |
| rs6876615  | 5 | 13338575 A                     | 26 | 48 C                      | 0.0004647  |
| rs7714774  | 5 | 13341369 T                     | 21 | 42 C                      | 0.0005665  |
| rs2218533  | 5 | 13341742 C                     | 26 | 48 G                      | 0.0004647  |
| rs13153366 | 5 | 13342831 C                     | 26 | 48 A                      | 0.0004647  |
| rs978845   | 5 | 13348985 T                     | 27 | 48 C                      | 0.0008377  |
| rs71585699 | 5 | 13349598 C                     | 29 | 52 T                      | 0.0001305  |
| rs7715889  | 5 | 13351114 G                     | 26 | 48 A                      | 0.0004647  |
| rs13168766 | 5 | 13351173 C                     | 17 | 37 G                      | 0.0006349  |
| rs1466015  | 5 | 13353683 C                     | 26 | 48 T                      | 0.0004647  |
| rs11133748 | 5 | 13364690 T                     | 26 | 48 C                      | 0.0004647  |



|             |   |          |      |    |    |     |            |
|-------------|---|----------|------|----|----|-----|------------|
| rs12153106  | 5 | 13370624 | C    | 26 | 49 | T   | 0.0002646  |
| rs62342776  | 5 | 13395422 | A    | 15 | 34 | G   | 0.0008313  |
| rs66904646  | 5 | 13489425 | T    | 15 | 34 | C   | 0.0008313  |
| rs68032177  | 5 | 13490410 | T    | 15 | 34 | A   | 0.0008313  |
| rs151145    | 5 | 13491184 | G    | 15 | 34 | C   | 0.0008313  |
| rs151143    | 5 | 13492001 | C    | 15 | 34 | T   | 0.0008313  |
| rs11949792  | 5 | 13492497 | A    | 15 | 34 | G   | 0.0008313  |
| rs230681    | 5 | 13494184 | C    | 15 | 34 | T   | 0.0008313  |
| rs34206111  | 5 | 13495880 | C    | 15 | 34 | T   | 0.0008313  |
| rs35521632  | 5 | 13496453 | C    | 15 | 34 | T   | 0.0008313  |
| rs230052    | 5 | 13496833 | A    | 15 | 34 | C   | 0.0008313  |
| rs230045    | 5 | 13499857 | C    | 15 | 34 | T   | 0.0008313  |
| rs3868287   | 5 | 13503064 | G    | 15 | 34 | T   | 0.0008313  |
| 5:16796588  | 5 | 16796588 | AAAG | 22 | 43 | A   | 0.000565   |
| rs143565175 | 5 | 19187627 | G    | 31 | 11 | C   | 0.0008085  |
| rs373271730 | 5 | 20909293 | G    | 30 | 51 | GAT | 0.0009286  |
| rs6451918   | 5 | 20909303 | G    | 29 | 50 | T   | 0.0009027  |
| rs67589059  | 5 | 20915694 | T    | 30 | 51 | C   | 0.0009286  |
| rs2201403   | 5 | 20919166 | G    | 30 | 51 | C   | 0.0009286  |
| rs2201404   | 5 | 20919200 | G    | 30 | 51 | A   | 0.0009286  |
| rs184303633 | 5 | 21357168 | C    | 15 | 0  | G   | 0.00003259 |
| rs71607499  | 5 | 25608509 | C    | 16 | 35 | CT  | 0.000956   |
| rs36999     | 5 | 25611107 | C    | 15 | 35 | T   | 0.0004795  |
| rs12513781  | 5 | 25620280 | A    | 14 | 36 | G   | 0.0001265  |
| rs12519886  | 5 | 25621441 | G    | 15 | 36 | C   | 0.0002717  |
| rs62355015  | 5 | 25622323 | G    | 15 | 35 | C   | 0.0004795  |
| rs62355019  | 5 | 25625327 | C    | 15 | 36 | T   | 0.0002717  |
| rs10057753  | 5 | 25626830 | T    | 21 | 41 | A   | 0.0009669  |
| rs34477507  | 5 | 25627052 | C    | 15 | 36 | G   | 0.0002717  |
| rs6450656   | 5 | 28648576 | A    | 35 | 57 | C   | 0.0003656  |
| rs7722988   | 5 | 28648707 | T    | 35 | 57 | C   | 0.0003656  |
| rs6893661   | 5 | 34732224 | A    | 57 | 31 | G   | 0.0003656  |
| rs11747914  | 5 | 34831252 | A    | 35 | 13 | G   | 0.0006539  |
| rs1056115   | 5 | 34838085 | C    | 39 | 16 | G   | 0.0006105  |
| rs62355748  | 5 | 34841579 | G    | 40 | 16 | A   | 0.0003516  |
| rs3846629   | 5 | 34841785 | G    | 40 | 16 | C   | 0.0003516  |
| rs3846630   | 5 | 34841812 | G    | 40 | 16 | C   | 0.0003516  |
| rs16868532  | 5 | 34856805 | A    | 41 | 18 | G   | 0.0007885  |
| rs56015042  | 5 | 34856818 | G    | 41 | 18 | A   | 0.0007885  |
| rs16868533  | 5 | 34856874 | C    | 41 | 17 | A   | 0.0004047  |

|             |   |               |    |       |           |
|-------------|---|---------------|----|-------|-----------|
| rs16868534  | 5 | 34857445 G    | 41 | 18 A  | 0.0007885 |
| rs16868536  | 5 | 34857470 T    | 41 | 18 C  | 0.0007885 |
| rs58930292  | 5 | 34858091 A    | 41 | 18 AT | 0.0007885 |
| rs6869117   | 5 | 34858483 G    | 41 | 18 A  | 0.0007885 |
| rs72732819  | 5 | 34858595 T    | 41 | 18 C  | 0.0007885 |
| rs72732820  | 5 | 34858662 C    | 41 | 18 A  | 0.0007885 |
| rs146615654 | 5 | 34858788 TA   | 41 | 18 T  | 0.0007885 |
| rs72732821  | 5 | 34859011 A    | 41 | 18 C  | 0.0007885 |
| rs77456162  | 5 | 35113923 T    | 0  | 12 C  | 0.0001237 |
| rs1049524   | 5 | 36687393 A    | 28 | 50 G  | 0.0005077 |
| rs60229781  | 5 | 36690843 C    | 27 | 48 G  | 0.0008377 |
| rs61496493  | 5 | 36690844 A    | 27 | 48 G  | 0.0008377 |
| rs158790    | 5 | 36837911 C    | 44 | 18 T  | 0.0001482 |
| rs158786    | 5 | 36850887 G    | 45 | 20 A  | 0.000332  |
| rs11347966  | 5 | 37158892 A    | 13 | 0 AT  | 0.0001541 |
| rs13356615  | 5 | 37208782 G    | 14 | 1 C   | 0.000663  |
| 5:57402182  | 5 | 57402182 A    | 12 | 34 G  | 0.0001353 |
| rs346406    | 5 | 62490220 G    | 24 | 6 A   | 0.0005592 |
| rs186968    | 5 | 62498557 C    | 24 | 6 T   | 0.0005592 |
| rs59857064  | 5 | 73735191 T    | 12 | 0 A   | 0.0003422 |
| rs201096991 | 5 | 83266476 G    | 0  | 10 A  | 0.0005917 |
| rs6859947   | 5 | 87901547 A    | 55 | 30 C  | 0.0006201 |
| rs6452797   | 5 | 87901964 A    | 55 | 30 G  | 0.0006201 |
| rs324887    | 5 | 87905818 A    | 55 | 30 G  | 0.0006201 |
| rs192015    | 5 | 87906959 T    | 55 | 30 C  | 0.0006201 |
| rs324888    | 5 | 87907314 T    | 55 | 30 C  | 0.0006201 |
| rs184453    | 5 | 87908427 T    | 55 | 30 G  | 0.0006201 |
| rs226489    | 5 | 87909517 T    | 55 | 29 C  | 0.000347  |
| rs324890    | 5 | 87909843 C    | 55 | 30 A  | 0.0006201 |
| rs1644040   | 5 | 87909882 T    | 55 | 30 C  | 0.0006201 |
| rs55855860  | 5 | 87912634 AAAT | 55 | 30 A  | 0.0006201 |
| rs324897    | 5 | 87914467 A    | 55 | 30 C  | 0.0006201 |
| rs324900    | 5 | 87917231 G    | 55 | 30 A  | 0.0006201 |
| rs188971    | 5 | 87921066 G    | 55 | 30 A  | 0.0006201 |
| rs1628054   | 5 | 87922342 T    | 55 | 30 C  | 0.0006201 |
| rs1659072   | 5 | 87923770 G    | 55 | 30 A  | 0.0006201 |
| rs2545694   | 5 | 87928570 A    | 55 | 30 G  | 0.0006201 |
| rs1659070   | 5 | 87929515 G    | 55 | 30 C  | 0.0006201 |
| rs10053136  | 5 | 87930488 A    | 55 | 30 G  | 0.0006201 |
| rs2009730   | 5 | 87933568 A    | 55 | 30 G  | 0.0006201 |

|             |                    |    |       |             |
|-------------|--------------------|----|-------|-------------|
| 5:89461167  | 5 89461167 G       | 23 | 47 GT | 0.0001212   |
| 5:89461168  | 5 89461168 G       | 23 | 47 T  | 0.0001212   |
| rs10514355  | 5 92051536 T       | 11 | 0 C   | 0.0007274   |
| 5:94344766  | 5 94344766 A       | 36 | 14 G  | 0.000808    |
| 5:94344769  | 5 94344769 G       | 37 | 14 A  | 0.0004701   |
| 5:94344774  | 5 94344774 A       | 36 | 14 G  | 0.000808    |
| rs80343556  | 5 98624487 GT      | 6  | 22 G  | 0.0007921   |
| rs17166834  | 5 98624513 G       | 6  | 22 A  | 0.0007921   |
| rs10477869  | 5 105959382 C      | 42 | 18 A  | 0.0004599   |
| rs202030174 | 5 105960773 C      | 42 | 17 A  | 0.0002305   |
| rs74957701  | 5 105960906 C      | 42 | 17 G  | 0.0002305   |
| rs190734124 | 5 105962622 A      | 42 | 17 C  | 0.0002305   |
| rs183331089 | 5 105962624 G      | 42 | 17 C  | 0.0002305   |
| rs6873840   | 5 105965170 G      | 42 | 17 A  | 0.0002305   |
| rs138302217 | 5 105974033 T      | 41 | 17 C  | 0.0004047   |
| rs58151039  | 5 105975178 C      | 42 | 17 A  | 0.0002305   |
| rs5870212   | 5 105976556 G      | 42 | 17 GA | 0.0002305   |
| rs4616879   | 5 105982997 C      | 42 | 17 T  | 0.0002305   |
| rs9327970   | 5 105985135 G      | 42 | 17 A  | 0.0002305   |
| rs1158614   | 5 105985695 C      | 41 | 17 T  | 0.0004047   |
| rs966225    | 5 105986040 T      | 42 | 17 A  | 0.0002305   |
| rs1370474   | 5 105990288 C      | 41 | 17 T  | 0.0004047   |
| rs770165    | 5 107046018 T      | 26 | 5 G   | 0.00005139  |
| rs140935191 | 5 113218057 G      | 2  | 15 T  | 0.0006952   |
| rs61684041  | 5 113457167 T      | 27 | 8 C   | 0.0006326   |
| 5:115814626 | 5 115814626 G      | 30 | 6 GT  | 0.00002435  |
| 5:115814627 | 5 115814627 G      | 32 | 6 T   | 0.000003036 |
| rs13167197  | 5 125408090 C      | 41 | 18 T  | 0.0008624   |
| rs10463817  | 5 125471402 G      | 43 | 20 T  | 0.0009741   |
| rs10477666  | 5 125478358 C      | 43 | 20 A  | 0.0009741   |
| rs374455672 | 5 125482719 ATAAAG | 44 | 20 A  | 0.0005739   |
| rs140272168 | 5 125486927 G      | 43 | 20 A  | 0.0009741   |
| rs140084416 | 5 125487289 CTCTG  | 43 | 20 C  | 0.0009741   |
| rs6888912   | 5 125489390 C      | 43 | 20 T  | 0.0009741   |
| rs6870502   | 5 125489767 T      | 43 | 20 C  | 0.0009741   |
| rs3843819   | 5 125496145 C      | 34 | 11 T  | 0.0001478   |
| rs3898923   | 5 125498708 C      | 37 | 15 T  | 0.0009053   |
| rs3909804   | 5 125507018 A      | 35 | 13 C  | 0.0006539   |
| rs10061705  | 5 125507903 T      | 35 | 13 C  | 0.0006539   |
| rs10900783  | 5 125512816 T      | 35 | 13 C  | 0.0006539   |

|             |                              |    |           |           |
|-------------|------------------------------|----|-----------|-----------|
| rs13359614  | 5 125550942 C                | 35 | 13 T      | 0.0006539 |
| rs2194080   | 5 126634444 G                | 11 | 0 C       | 0.0007274 |
| rs864117    | 5 143142455 T                | 51 | 26 A      | 0.0005284 |
| rs2351023   | 5 153265309 C                | 51 | 27 T      | 0.0009437 |
| rs919221    | 5 153271076 T                | 54 | 29 C      | 0.0006016 |
| rs1366095   | 5 153271756 G                | 54 | 29 A      | 0.0006016 |
| rs2560037   | 5 153271973 G                | 54 | 29 A      | 0.0006016 |
| rs1366096   | 5 153272041 A                | 54 | 29 G      | 0.0006016 |
| rs35870631  | 5 153272504 C                | 52 | 29 CA     | 0.0008265 |
| rs1461242   | 5 153282305 C                | 54 | 29 T      | 0.0006016 |
| rs2964000   | 5 153290715 C                | 56 | 31 T      | 0.0006352 |
| rs11330171  | 5 153297804 T                | 55 | 31 TA     | 0.0005984 |
| rs973319    | 5 153303618 C                | 30 | 53 T      | 0.0003072 |
| rs1461238   | 5 153304416 C                | 30 | 53 T      | 0.0003072 |
| rs35257267  | 5 153304538 T                | 30 | 53 C      | 0.0003072 |
| rs970751    | 5 153305796 T                | 30 | 53 C      | 0.0003072 |
| rs386248    | 5 153308317 T                | 30 | 53 G      | 0.0003072 |
| rs35910531  | 5 153310336 TAAAA            | 30 | 54 T      | 0.0001708 |
| rs406708    | 5 153311032 A                | 30 | 53 G      | 0.0003072 |
| rs432891    | 5 153311464 C                | 31 | 53 T      | 0.0005517 |
| rs394446    | 5 153311841 G                | 30 | 53 A      | 0.0003072 |
| rs381582    | 5 153312282 A                | 30 | 53 G      | 0.0003072 |
| rs454317    | 5 153312771 A                | 30 | 53 G      | 0.0003072 |
| rs201644188 | 5 153313518 G                | 30 | 53 GAGACA | 0.0003072 |
| rs448234    | 5 153315300 A                | 30 | 53 G      | 0.0003072 |
| rs1438586   | 5 153315743 C                | 30 | 53 A      | 0.0003072 |
| rs11167651  | 5 153322296 A                | 30 | 53 C      | 0.0003072 |
| rs4349768   | 5 153323126 A                | 30 | 53 C      | 0.0003072 |
| rs690091    | 5 153323948 G                | 30 | 53 A      | 0.0003072 |
| rs557697    | 5 153324256 C                | 30 | 53 A      | 0.0003072 |
| rs689836    | 5 153324406 G                | 30 | 53 A      | 0.0003072 |
| rs2560068   | 5 153330453 T                | 30 | 53 C      | 0.0003072 |
| rs5872353   | 5 153336184 CT               | 30 | 53 C      | 0.0003072 |
| rs11355335  | 5 153337255 TA               | 30 | 53 T      | 0.0003072 |
| rs286958    | 5 153338048 T                | 30 | 53 C      | 0.0003072 |
| rs286959    | 5 153338516 C                | 30 | 53 T      | 0.0003072 |
| rs286961    | 5 153341404 C                | 30 | 53 G      | 0.0003072 |
| rs2560050   | 5 153346190 G                | 30 | 53 C      | 0.0003072 |
| rs11267325  | 5 153347553 GAAGTCTATGGTATCA | 31 | 52 G      | 0.0009496 |
| rs4958688   | 5 153351519 G                | 30 | 53 A      | 0.0003072 |

|             |                    |    |      |           |
|-------------|--------------------|----|------|-----------|
| rs4958689   | 5 153351720 T      | 30 | 53 C | 0.0003072 |
| rs10053993  | 5 153355854 A      | 31 | 53 G | 0.0005517 |
| rs199679691 | 5 154592152 G      | 39 | 15 A | 0.0003228 |
| rs1095103   | 5 158088445 A      | 33 | 12 G | 0.0005855 |
| rs1095104   | 5 158088897 A      | 33 | 12 G | 0.0005855 |
| rs824863    | 5 158090913 C      | 33 | 12 G | 0.0005855 |
| rs403334    | 5 158096651 T      | 33 | 12 G | 0.0005855 |
| rs33140     | 5 158097381 G      | 33 | 12 C | 0.0005855 |
| rs184945    | 5 158100084 T      | 33 | 12 C | 0.0005855 |
| rs33192     | 5 158103549 A      | 33 | 12 C | 0.0005855 |
| rs12153343  | 5 158964827 T      | 27 | 50 A | 0.0002777 |
| 5:159308310 | 5 159308310 CTCTG  | 18 | 2 C  | 0.0001998 |
| rs35019914  | 5 161444006 C      | 18 | 3 T  | 0.0008121 |
| rs189855007 | 5 161875773 A      | 13 | 0 G  | 0.00016   |
| rs12189109  | 5 162746500 T      | 12 | 0 C  | 0.0003422 |
| rs12186371  | 5 162748604 T      | 12 | 0 C  | 0.0003422 |
| rs1019447   | 5 162751240 T      | 12 | 0 C  | 0.0003422 |
| rs2901732   | 5 162752132 T      | 12 | 0 C  | 0.0003422 |
| rs1363151   | 5 162756297 A      | 13 | 0 T  | 0.00016   |
| rs1421840   | 5 162773548 G      | 21 | 4 A  | 0.0004069 |
| rs13354373  | 5 162775966 G      | 29 | 50 A | 0.0009027 |
| rs13360947  | 5 162776086 G      | 29 | 50 C | 0.0009027 |
| rs58349075  | 5 162777481 AGTTTT | 29 | 50 A | 0.0009027 |
| rs10078474  | 5 162777764 T      | 29 | 50 C | 0.0009027 |
| rs9313959   | 5 162777927 C      | 29 | 50 T | 0.0009027 |
| rs10056393  | 5 162777944 G      | 29 | 50 A | 0.0009027 |
| rs9313960   | 5 162778229 C      | 29 | 50 T | 0.0009027 |
| rs10214000  | 5 162778238 C      | 29 | 50 G | 0.0009027 |
| rs2216559   | 5 162778631 G      | 23 | 5 A  | 0.0003619 |
| rs9313962   | 5 162778654 A      | 29 | 50 G | 0.0009027 |
| rs10040552  | 5 162778735 C      | 29 | 50 G | 0.0009027 |
| rs10038068  | 5 162778786 G      | 29 | 50 A | 0.0009027 |
| rs11953070  | 5 162779652 C      | 29 | 50 T | 0.0009027 |
| rs10060724  | 5 162780014 T      | 29 | 50 A | 0.0009027 |
| rs10062341  | 5 162780026 C      | 29 | 50 T | 0.0009027 |
| rs10060726  | 5 162780028 G      | 29 | 50 A | 0.0009027 |
| rs10060800  | 5 162780114 C      | 29 | 50 A | 0.0009027 |
| rs10062403  | 5 162780137 C      | 29 | 50 T | 0.0009027 |
| rs34587245  | 5 162780723 A      | 29 | 50 G | 0.0009027 |
| rs35466466  | 5 162780761 A      | 29 | 50 G | 0.0009027 |

|             |                   |    |          |            |
|-------------|-------------------|----|----------|------------|
| rs56409434  | 5 162780930 G     | 29 | 50 C     | 0.0009027  |
| rs10073855  | 5 162780989 T     | 29 | 50 C     | 0.0009027  |
| rs4869037   | 5 162781126 C     | 29 | 50 G     | 0.0009027  |
| rs4869038   | 5 162781393 C     | 29 | 50 T     | 0.0009027  |
| rs12189058  | 5 162781710 T     | 29 | 50 C     | 0.0009027  |
| rs12186706  | 5 162781814 C     | 29 | 50 A     | 0.0009027  |
| rs4869039   | 5 162782331 T     | 29 | 50 C     | 0.0009027  |
| rs4869041   | 5 162782387 T     | 29 | 50 C     | 0.0009027  |
| rs61427225  | 5 162782877 T     | 29 | 50 G     | 0.0009027  |
| rs34901049  | 5 162782939 A     | 29 | 50 G     | 0.0009027  |
| rs1895175   | 5 162803569 A     | 31 | 11 T     | 0.0008085  |
| rs35167126  | 5 162803828 G     | 31 | 11 A     | 0.0008085  |
| rs70997044  | 5 162810722 AAGGG | 21 | 4 A      | 0.000448   |
| rs55982071  | 5 168253296 A     | 1  | 13 G     | 0.0005059  |
| rs59344702  | 5 168254496 C     | 1  | 13 T     | 0.0005059  |
| rs7726584   | 5 168254897 G     | 1  | 13 T     | 0.0005059  |
| rs7707369   | 5 168255217 A     | 1  | 13 G     | 0.0005059  |
| rs11956426  | 5 168255738 T     | 0  | 13 G     | 0.00005596 |
| rs61430969  | 5 168257250 A     | 0  | 13 G     | 0.00005596 |
| rs10607223  | 5 168258035 C     | 0  | 13 CACAG | 0.00006504 |
| rs6883428   | 5 168258281 G     | 0  | 13 A     | 0.00005596 |
| rs72820025  | 5 172807846 A     | 6  | 23 G     | 0.000429   |
| rs4868495   | 5 174611803 C     | 0  | 12 T     | 0.0001237  |
| rs4868496   | 5 174611877 T     | 0  | 12 A     | 0.0001237  |
| rs60545442  | 5 174615815 TG    | 0  | 14 T     | 0.00002513 |
| rs6601202   | 5 177486345 T     | 21 | 44 C     | 0.0001836  |
| rs11950505  | 5 177487180 T     | 21 | 44 C     | 0.0001836  |
| rs10038486  | 5 177487613 G     | 21 | 44 A     | 0.0001836  |
| rs6601205   | 5 177500019 G     | 19 | 45 A     | 0.00002313 |
| rs11739583  | 5 177504116 G     | 17 | 40 A     | 0.0001139  |
| rs11748761  | 5 177504158 A     | 17 | 40 G     | 0.0001139  |
| rs34491975  | 5 177506311 C     | 17 | 40 T     | 0.0001139  |
| rs62390499  | 5 177506330 T     | 17 | 40 C     | 0.0001139  |
| rs113305754 | 5 177506427 CA    | 17 | 40 C     | 0.0001139  |
| rs55702409  | 5 177506578 A     | 17 | 40 G     | 0.0001139  |
| rs56395215  | 5 177506636 G     | 17 | 40 A     | 0.0001139  |
| rs59413527  | 5 177506695 C     | 17 | 40 CA    | 0.0001139  |
| rs4470773   | 5 177507080 G     | 16 | 40 C     | 0.00005288 |
| rs4501359   | 5 177507167 T     | 17 | 40 C     | 0.0001139  |
| rs4519941   | 5 177507287 A     | 17 | 40 G     | 0.0001139  |

|             |   |           |    |    |    |                        |            |
|-------------|---|-----------|----|----|----|------------------------|------------|
| rs4518421   | 5 | 177507302 | C  | 17 | 40 | T                      | 0.0001139  |
| rs4526126   | 5 | 177507306 | C  | 17 | 40 | T                      | 0.0001139  |
| rs4976806   | 5 | 177507767 | T  | 15 | 37 | C                      | 0.0001512  |
| rs4976807   | 5 | 177507914 | G  | 15 | 37 | C                      | 0.0001512  |
| rs4976808   | 5 | 177507917 | G  | 15 | 37 | A                      | 0.0001512  |
| rs62390501  | 5 | 177508392 | A  | 15 | 37 | C                      | 0.0001512  |
| rs34890405  | 5 | 177508458 | C  | 15 | 37 | G                      | 0.0001512  |
| rs58184656  | 5 | 177508895 | C  | 15 | 37 | T                      | 0.0001512  |
| rs62390504  | 5 | 177508944 | G  | 15 | 37 | C                      | 0.0001512  |
| rs67596535  | 5 | 177509098 | C  | 15 | 37 | T                      | 0.0001512  |
| rs4501357   | 5 | 177510483 | A  | 15 | 37 | G                      | 0.0001512  |
| rs4370294   | 5 | 177510515 | G  | 15 | 38 | A                      | 0.00008268 |
| rs4608937   | 5 | 177510571 | A  | 15 | 37 | G                      | 0.0001512  |
| rs12656767  | 5 | 177511433 | A  | 18 | 38 | G                      | 0.0007166  |
| rs12652997  | 5 | 177524504 | A  | 22 | 45 | G                      | 0.0002011  |
| rs35312700  | 5 | 177525307 | G  | 22 | 46 | C                      | 0.0001115  |
| rs146888227 | 5 | 177525995 | A  | 22 | 46 | ATTTTAT                | 0.0001115  |
| rs2296576   | 6 | 12008262  | G  | 42 | 19 | C                      | 0.0008809  |
| rs6456473   | 6 | 22221924  | G  | 40 | 16 | C                      | 0.0003516  |
| rs1891086   | 6 | 22222129  | A  | 39 | 15 | C                      | 0.0003011  |
| rs1361550   | 6 | 22230762  | C  | 20 | 4  | T                      | 0.0007606  |
| 6:23291477  | 6 | 23291477  | A  | 35 | 16 | ACATACATTATACATAGTATAT | 0.0008457  |
| 6:23406822  | 6 | 23406822  | G  | 50 | 26 | T                      | 0.0008986  |
| rs10456346  | 6 | 26966846  | G  | 0  | 10 | A                      | 0.0005917  |
| rs10456347  | 6 | 26966853  | G  | 0  | 10 | A                      | 0.0005917  |
| rs10456348  | 6 | 26969033  | A  | 0  | 10 | T                      | 0.0005917  |
| rs146539976 | 6 | 26977290  | G  | 0  | 10 | T                      | 0.0005917  |
| rs78512949  | 6 | 28328293  | A  | 12 | 0  | G                      | 0.0003422  |
| rs112181044 | 6 | 28329677  | T  | 14 | 1  | C                      | 0.0006347  |
| rs76043707  | 6 | 28338473  | C  | 12 | 0  | T                      | 0.0003422  |
| rs78620132  | 6 | 28339253  | C  | 12 | 0  | T                      | 0.0003422  |
| rs111669150 | 6 | 28362987  | T  | 12 | 0  | C                      | 0.0003422  |
| rs17393066  | 6 | 28364793  | G  | 12 | 0  | A                      | 0.0003422  |
| rs2232419   | 6 | 28367768  | A  | 12 | 0  | G                      | 0.0003422  |
| rs10484541  | 6 | 28371346  | C  | 12 | 0  | G                      | 0.0003422  |
| rs143000906 | 6 | 28374338  | TA | 11 | 0  | T                      | 0.0007274  |
| rs56241479  | 6 | 28389174  | T  | 13 | 0  | G                      | 0.00016    |
| rs200981348 | 6 | 28390484  | TA | 12 | 0  | T                      | 0.0003786  |
| rs61653240  | 6 | 28403541  | TA | 13 | 0  | T                      | 0.0001681  |
| rs2531807   | 6 | 28420013  | G  | 12 | 0  | A                      | 0.0003422  |

|             |   |          |   |    |    |      |            |
|-------------|---|----------|---|----|----|------|------------|
| rs113145976 | 6 | 28438650 | C | 13 | 0  | T    | 0.00016    |
| rs9391676   | 6 | 28683743 | T | 29 | 51 | C    | 0.0005253  |
| rs200314214 | 6 | 28685339 | T | 56 | 29 | C    | 0.0001006  |
| rs1233576   | 6 | 28710244 | C | 32 | 50 | T    | 0.0007785  |
| rs1233577   | 6 | 28710303 | T | 31 | 54 | G    | 0.0005212  |
| rs4713208   | 6 | 29283579 | T | 46 | 18 | C    | 0.00004442 |
| rs720831    | 6 | 29284518 | A | 46 | 18 | G    | 0.00004442 |
| rs10447393  | 6 | 29316852 | T | 46 | 20 | C    | 0.0001885  |
| rs3094561   | 6 | 29404157 | T | 31 | 52 | G    | 0.0009496  |
| rs3117194   | 6 | 29426008 | T | 31 | 52 | C    | 0.0009496  |
| rs3128854   | 6 | 29431698 | A | 31 | 52 | G    | 0.0009496  |
| rs2107191   | 6 | 29434295 | C | 31 | 52 | T    | 0.0009496  |
| 6:32670159  | 6 | 32670159 | G | 16 | 2  | GTGT | 0.0008266  |
| rs78991495  | 6 | 47730859 | A | 21 | 4  | G    | 0.0009338  |
| rs62451863  | 6 | 51164272 | A | 2  | 16 | G    | 0.0003115  |
| rs5001609   | 6 | 53664396 | C | 26 | 47 | G    | 0.0007993  |
| rs4342426   | 6 | 53664707 | C | 26 | 47 | T    | 0.0007993  |
| rs4276503   | 6 | 53665789 | T | 26 | 47 | G    | 0.0007993  |
| rs9382239   | 6 | 53668765 | A | 26 | 47 | T    | 0.0007993  |
| rs3000998   | 6 | 53669994 | A | 26 | 47 | G    | 0.0007993  |
| rs4269375   | 6 | 53674055 | G | 26 | 47 | A    | 0.0007993  |
| rs4475321   | 6 | 53674284 | C | 26 | 47 | T    | 0.0007993  |
| rs4715425   | 6 | 53676354 | G | 26 | 47 | A    | 0.0007993  |
| rs6458960   | 6 | 53679557 | A | 26 | 47 | G    | 0.0007993  |
| rs3001003   | 6 | 53682419 | G | 26 | 47 | A    | 0.0007993  |
| rs9367542   | 6 | 53682971 | T | 26 | 47 | G    | 0.0007993  |
| rs6934444   | 6 | 53709891 | C | 26 | 47 | A    | 0.0007993  |
| rs6900929   | 6 | 53716382 | C | 26 | 47 | T    | 0.0007993  |
| rs6458970   | 6 | 53723814 | C | 26 | 47 | T    | 0.0007993  |
| rs9370236   | 6 | 53724274 | T | 26 | 47 | C    | 0.0007993  |
| rs4587161   | 6 | 53741885 | G | 26 | 47 | A    | 0.0007993  |
| rs7767443   | 6 | 53744589 | G | 26 | 48 | A    | 0.0004647  |
| rs9349686   | 6 | 53750470 | A | 26 | 47 | G    | 0.0007993  |
| rs4715431   | 6 | 53756628 | A | 26 | 47 | G    | 0.0007993  |
| rs9357774   | 6 | 53758724 | A | 26 | 47 | G    | 0.0007993  |
| rs9357775   | 6 | 53766293 | G | 26 | 47 | A    | 0.0007993  |
| 6:68054293  | 6 | 68054293 | G | 2  | 15 | GT   | 0.0006952  |
| rs200763254 | 6 | 69721029 | A | 31 | 53 | G    | 0.0005517  |
| rs2273428   | 6 | 70643018 | G | 28 | 51 | A    | 0.0002892  |
| rs681089    | 6 | 71036220 | A | 54 | 29 | G    | 0.0006016  |



|             |   |                |    |       |           |
|-------------|---|----------------|----|-------|-----------|
| rs9354914   | 6 | 71036721 A     | 28 | 49 G  | 0.0008723 |
| rs12524645  | 6 | 71036888 A     | 28 | 49 G  | 0.0008723 |
| rs13216351  | 6 | 71037050 G     | 28 | 49 A  | 0.0008723 |
| rs13199908  | 6 | 71037205 A     | 28 | 49 G  | 0.0008723 |
| rs34123608  | 6 | 71037266 G     | 28 | 49 GA | 0.0008723 |
| rs11757241  | 6 | 71037412 T     | 28 | 49 C  | 0.0008723 |
| rs2203664   | 6 | 71037500 A     | 28 | 49 C  | 0.0008723 |
| rs718352    | 6 | 71039156 T     | 28 | 49 C  | 0.0008723 |
| rs4299788   | 6 | 71041772 T     | 28 | 49 C  | 0.0008723 |
| rs1829198   | 6 | 71045723 A     | 28 | 49 G  | 0.0008723 |
| rs9364081   | 6 | 71049401 T     | 28 | 49 A  | 0.0008723 |
| rs1830499   | 6 | 71050871 T     | 28 | 49 C  | 0.0008723 |
| rs9455058   | 6 | 71052661 G     | 28 | 49 A  | 0.0008723 |
| rs9342786   | 6 | 71053744 A     | 28 | 49 G  | 0.0008723 |
| rs4707782   | 6 | 71053876 T     | 28 | 49 C  | 0.0008723 |
| rs9455063   | 6 | 71055346 A     | 28 | 49 T  | 0.0008723 |
| rs781115    | 6 | 71055814 C     | 34 | 55 T  | 0.0009818 |
| 6:74067800  | 6 | 74067800 TTATC | 5  | 20 T  | 0.000897  |
| 6:74067804  | 6 | 74067804 C     | 5  | 20 T  | 0.000897  |
| rs9446978   | 6 | 74385013 T     | 30 | 9 A   | 0.000506  |
| rs13197717  | 6 | 79081008 A     | 48 | 23 G  | 0.0004351 |
| rs1452532   | 6 | 79091870 C     | 48 | 23 A  | 0.0004351 |
| 6:79106259  | 6 | 79106259 T     | 18 | 2 TG  | 0.00022   |
| 6:79106260  | 6 | 79106260 A     | 18 | 2 G   | 0.000203  |
| rs9361404   | 6 | 79148758 A     | 48 | 23 T  | 0.0004351 |
| rs374448031 | 6 | 79181262 G     | 2  | 16 C  | 0.0003115 |
| 6:83237475  | 6 | 83237475 C     | 11 | 0 CT  | 0.0007274 |
| rs56164195  | 6 | 92582923 A     | 24 | 6 AC  | 0.0005592 |
| rs4707701   | 6 | 92584877 T     | 24 | 6 C   | 0.0005592 |
| rs426370    | 6 | 95009400 A     | 13 | 32 G  | 0.0009401 |
| rs10944744  | 6 | 95190344 A     | 30 | 52 G  | 0.00054   |
| rs9342418   | 6 | 95197387 C     | 28 | 49 T  | 0.0008723 |
| rs1022787   | 6 | 95202197 G     | 28 | 49 A  | 0.0008723 |
| rs222550    | 6 | 95211989 C     | 28 | 49 T  | 0.0008723 |
| rs6905809   | 6 | 95278921 C     | 13 | 32 A  | 0.0005036 |
| rs946120    | 6 | 97544329 A     | 55 | 27 G  | 0.0001001 |
| rs1737131   | 6 | 97558907 C     | 30 | 53 G  | 0.0003072 |
| rs1737132   | 6 | 97558912 T     | 30 | 53 G  | 0.0003072 |
| rs1206160   | 6 | 97561059 C     | 29 | 52 T  | 0.0002991 |
| rs1206161   | 6 | 97561088 C     | 29 | 52 T  | 0.0002991 |

|           |   |                 |    |            |           |
|-----------|---|-----------------|----|------------|-----------|
| rs1206146 | 6 | 97563222 T      | 29 | 52 C       | 0.0002991 |
| rs25637   | 6 | 97563868 CTGTT  | 29 | 53 C       | 0.0001666 |
| rs1206147 | 6 | 97565173 G      | 29 | 53 A       | 0.0001666 |
| rs1206148 | 6 | 97566464 T      | 29 | 51 C       | 0.0002768 |
| rs1206149 | 6 | 97566938 A      | 27 | 48 G       | 0.0008377 |
| rs1206150 | 6 | 97568482 G      | 30 | 52 A       | 0.00054   |
| rs1206151 | 6 | 97568613 T      | 30 | 52 C       | 0.00054   |
| rs1206152 | 6 | 97568963 C      | 30 | 52 A       | 0.00054   |
| rs1206166 | 6 | 97572581 C      | 30 | 52 T       | 0.00054   |
| rs1206167 | 6 | 97572903 G      | 30 | 52 A       | 0.00054   |
| rs1206168 | 6 | 97573678 C      | 30 | 52 A       | 0.00054   |
| rs1206169 | 6 | 97573953 T      | 30 | 52 C       | 0.00054   |
| rs2206094 | 6 | 97575196 T      | 30 | 52 C       | 0.00054   |
| rs1612775 | 6 | 97575423 C      | 30 | 52 G       | 0.00054   |
| rs1766531 | 6 | 97576033 C      | 30 | 52 T       | 0.00054   |
| rs1737135 | 6 | 97577031 G      | 30 | 52 A       | 0.00054   |
| rs6568746 | 6 | 97578265 C      | 30 | 51 T       | 0.0009286 |
| rs1206145 | 6 | 97585786 G      | 30 | 51 C       | 0.0009286 |
| rs1206176 | 6 | 97587527 A      | 30 | 51 T       | 0.0009286 |
| rs1206177 | 6 | 97590623 T      | 30 | 51 C       | 0.0009286 |
| rs1206178 | 6 | 97591680 A      | 30 | 51 G       | 0.0009286 |
| rs1206134 | 6 | 97601582 T      | 30 | 51 A       | 0.0009286 |
| rs140706  | 6 | 97603195 A      | 30 | 51 AATTGTT | 0.0009286 |
| rs1206137 | 6 | 97605268 G      | 30 | 51 A       | 0.0009286 |
| rs1206139 | 6 | 97606816 C      | 30 | 51 G       | 0.0009286 |
| rs1766513 | 6 | 97607265 G      | 30 | 51 T       | 0.0009286 |
| rs1737140 | 6 | 97607266 A      | 30 | 51 C       | 0.0009286 |
| rs1206141 | 6 | 97608206 T      | 30 | 51 G       | 0.0009286 |
| rs3061513 | 6 | 97612420 CAAAAT | 30 | 51 C       | 0.0009286 |
| rs1206124 | 6 | 97612708 G      | 30 | 51 T       | 0.0009286 |
| rs1209290 | 6 | 97613163 C      | 30 | 51 T       | 0.0009286 |
| rs1206125 | 6 | 97616717 G      | 30 | 51 A       | 0.0009286 |
| rs1623061 | 6 | 97621318 T      | 30 | 51 A       | 0.0009286 |
| rs1623056 | 6 | 97621320 T      | 30 | 51 C       | 0.0009286 |
| rs3061515 | 6 | 97621860 G      | 30 | 51 GCTC    | 0.0009286 |
| rs1206129 | 6 | 97622500 A      | 29 | 51 G       | 0.0005253 |
| rs6926003 | 6 | 97624248 C      | 30 | 51 T       | 0.0009286 |
| rs1766470 | 6 | 97625034 C      | 30 | 51 T       | 0.0009286 |
| rs1014976 | 6 | 97628442 T      | 30 | 51 G       | 0.0009286 |
| rs6913262 | 6 | 97629155 C      | 30 | 51 T       | 0.0009286 |

|             |   |           |    |    |    |      |           |
|-------------|---|-----------|----|----|----|------|-----------|
| rs1206170   | 6 | 97629381  | G  | 30 | 51 | C    | 0.0009286 |
| rs1206171   | 6 | 97629689  | A  | 30 | 51 | C    | 0.0009286 |
| rs717020    | 6 | 97630619  | T  | 30 | 51 | C    | 0.0009286 |
| rs1206172   | 6 | 97631143  | C  | 30 | 51 | T    | 0.0009286 |
| rs1209293   | 6 | 97632347  | T  | 30 | 51 | C    | 0.0009286 |
| rs1206174   | 6 | 97637114  | T  | 29 | 49 | C    | 0.0008479 |
| rs1206175   | 6 | 97639120  | C  | 30 | 51 | T    | 0.0009286 |
| rs1206163   | 6 | 97642227  | T  | 30 | 51 | C    | 0.0009286 |
| rs6931754   | 6 | 97644798  | T  | 30 | 51 | C    | 0.0009286 |
| rs6932480   | 6 | 97645222  | G  | 30 | 51 | C    | 0.0009286 |
| rs72941463  | 6 | 99484928  | A  | 9  | 27 | G    | 0.000654  |
| rs34657809  | 6 | 102322607 | T  | 33 | 54 | TG   | 0.0009764 |
| rs1417182   | 6 | 102333341 | A  | 55 | 30 | G    | 0.0006201 |
| 6:110302614 | 6 | 110302614 | A  | 6  | 23 | AT   | 0.000429  |
| 6:110302616 | 6 | 110302616 | C  | 6  | 23 | CTAT | 0.000429  |
| rs35422813  | 6 | 113672328 | G  | 14 | 33 | GT   | 0.0007122 |
| rs9387133   | 6 | 113680017 | T  | 14 | 33 | C    | 0.0007122 |
| rs34282960  | 6 | 129981642 | G  | 42 | 19 | GA   | 0.0008809 |
| rs9402159   | 6 | 129982039 | T  | 43 | 19 | A    | 0.0005165 |
| rs9388722   | 6 | 129982285 | G  | 42 | 17 | A    | 0.0002559 |
| rs4482995   | 6 | 129984362 | A  | 44 | 19 | T    | 0.0002974 |
| rs13203844  | 6 | 129985147 | C  | 44 | 19 | T    | 0.0002974 |
| rs12193673  | 6 | 129985921 | A  | 44 | 19 | G    | 0.0002974 |
| rs9398914   | 6 | 129986453 | G  | 41 | 18 | C    | 0.0007885 |
| rs6899523   | 6 | 129986588 | G  | 44 | 19 | A    | 0.0002974 |
| rs6922711   | 6 | 129986792 | C  | 44 | 19 | T    | 0.0002974 |
| rs9402160   | 6 | 129987987 | G  | 44 | 19 | A    | 0.0002974 |
| rs11450417  | 6 | 129988030 | GC | 44 | 19 | G    | 0.0002974 |
| rs6906744   | 6 | 129988135 | T  | 44 | 19 | C    | 0.0002974 |
| rs78917176  | 6 | 129988199 | G  | 43 | 19 | T    | 0.0005165 |
| rs79069340  | 6 | 129988200 | A  | 43 | 19 | T    | 0.0005165 |
| rs76543028  | 6 | 129988201 | A  | 43 | 19 | C    | 0.0005165 |
| rs9398915   | 6 | 129988553 | A  | 44 | 19 | T    | 0.0002974 |
| rs9402162   | 6 | 129988892 | C  | 44 | 19 | G    | 0.0002974 |
| rs7750456   | 6 | 129989333 | T  | 44 | 19 | C    | 0.0002974 |
| rs4379317   | 6 | 129989626 | G  | 44 | 19 | A    | 0.0002974 |
| rs9388723   | 6 | 129997515 | G  | 39 | 16 | A    | 0.0006105 |
| rs6569619   | 6 | 129997885 | G  | 42 | 17 | C    | 0.0002305 |
| rs6569620   | 6 | 129999270 | C  | 42 | 17 | G    | 0.0002305 |
| 6:140587386 | 6 | 140587386 | G  | 17 | 2  | T    | 0.0004014 |

|             |                   |    |       |           |
|-------------|-------------------|----|-------|-----------|
| rs1889552   | 6 150473849 T     | 30 | 10 C  | 0.0006347 |
| rs4870319   | 6 150479530 T     | 30 | 10 C  | 0.0006347 |
| rs9384195   | 6 150480683 G     | 30 | 10 A  | 0.0006347 |
| rs58569771  | 6 150482412 T     | 34 | 12 TA | 0.0009752 |
| rs2504068   | 6 152097697 C     | 53 | 27 G  | 0.0003204 |
| rs1285054   | 6 152099593 G     | 56 | 30 T  | 0.0003574 |
| rs35801479  | 6 152100077 G     | 31 | 55 GT | 0.0001739 |
| rs655459    | 6 152102282 T     | 54 | 28 G  | 0.0003346 |
| rs112556235 | 6 155762435 ATTGT | 30 | 52 A  | 0.00054   |
| rs9322527   | 6 155900525 T     | 22 | 44 A  | 0.0003557 |
| rs72994685  | 6 155908174 G     | 19 | 40 C  | 0.0004646 |
| rs72994693  | 6 155910583 G     | 19 | 40 T  | 0.0004646 |
| rs4869864   | 6 155912940 C     | 19 | 40 T  | 0.0004646 |
| rs11156031  | 6 155941911 A     | 21 | 41 G  | 0.0009669 |
| rs12204654  | 6 155966445 G     | 21 | 41 T  | 0.0009669 |
| rs4870385   | 6 156007722 G     | 21 | 42 T  | 0.0005665 |
| rs1391661   | 6 156008329 A     | 20 | 42 T  | 0.0002952 |
| rs72998695  | 6 156008898 C     | 20 | 42 T  | 0.0002952 |
| rs72998698  | 6 156008906 T     | 20 | 42 C  | 0.0002952 |
| rs9654608   | 6 156010248 C     | 20 | 42 T  | 0.0002952 |
| rs9480188   | 6 156011108 A     | 21 | 42 C  | 0.0005665 |
| rs9478673   | 6 156012817 T     | 20 | 42 C  | 0.0002952 |
| rs9480190   | 6 156012974 T     | 20 | 42 G  | 0.0002952 |
| rs111898961 | 6 156014193 T     | 20 | 41 C  | 0.0005156 |
| rs9397834   | 6 156015299 T     | 33 | 54 C  | 0.0009764 |
| rs13203482  | 6 158865022 C     | 14 | 1 T   | 0.0006347 |
| rs9295108   | 6 160123373 A     | 12 | 32 G  | 0.0004387 |
| rs9295109   | 6 160123425 C     | 15 | 35 T  | 0.0004795 |
| rs12194483  | 6 160131463 T     | 16 | 35 G  | 0.000956  |
| rs783176    | 6 161170835 G     | 19 | 3 A   | 0.0004265 |
| rs35692234  | 6 161182859 CA    | 18 | 3 C   | 0.0008121 |
| rs2465835   | 6 161186537 G     | 18 | 3 A   | 0.0008121 |
| rs2465836   | 6 161187044 A     | 18 | 3 G   | 0.0008121 |
| rs1271391   | 6 161190851 G     | 19 | 3 T   | 0.0004265 |
| rs62436699  | 6 161190945 C     | 17 | 2 G   | 0.0004014 |
| rs1652498   | 6 161191645 G     | 19 | 3 T   | 0.0004265 |
| rs36032205  | 6 161191858 A     | 19 | 3 AG  | 0.0004265 |
| rs1740447   | 6 161193779 A     | 19 | 3 G   | 0.0004265 |
| rs1652501   | 6 161193959 G     | 19 | 3 C   | 0.0004265 |
| rs1782602   | 6 161199887 A     | 20 | 4 G   | 0.0007606 |

|             |   |           |     |    |    |                       |            |
|-------------|---|-----------|-----|----|----|-----------------------|------------|
| rs1740438   | 6 | 161199900 | C   | 20 | 4  | T                     | 0.0007606  |
| rs1652489   | 6 | 161200191 | A   | 19 | 3  | G                     | 0.0004265  |
| rs1652492   | 6 | 161201024 | A   | 19 | 3  | G                     | 0.0004265  |
| rs1367216   | 6 | 161203454 | C   | 19 | 3  | T                     | 0.0004265  |
| 6:161211051 | 6 | 161211051 | A   | 16 | 2  | AAAGAGGTGAGAAATCCCTGG | 0.0007845  |
| rs1740430   | 6 | 161211997 | A   | 19 | 3  | G                     | 0.0004265  |
| rs1652456   | 6 | 161215051 | T   | 19 | 3  | A                     | 0.0004265  |
| rs1247572   | 6 | 161222490 | G   | 19 | 3  | A                     | 0.0004265  |
| rs1740466   | 6 | 161225836 | T   | 19 | 3  | C                     | 0.0004265  |
| rs145349920 | 6 | 161225900 | TA  | 19 | 3  | T                     | 0.0004265  |
| rs34026567  | 6 | 161225901 | G   | 19 | 3  | T                     | 0.0004265  |
| rs201615835 | 6 | 163817782 | GTA | 4  | 19 | G                     | 0.0006572  |
| 6:165997511 | 6 | 165997511 | A   | 11 | 0  | T                     | 0.0007274  |
| rs72079749  | 6 | 167450849 | C   | 2  | 15 | CAATT                 | 0.0006243  |
| rs12525522  | 6 | 169212877 | T   | 17 | 37 | A                     | 0.0006349  |
| rs4360107   | 6 | 169222987 | C   | 17 | 37 | A                     | 0.0006349  |
| rs201969550 | 7 | 6476788   | A   | 1  | 13 | AT                    | 0.0005601  |
| rs6968854   | 7 | 7034807   | C   | 42 | 19 | A                     | 0.0008809  |
| rs6463624   | 7 | 7034996   | C   | 42 | 19 | T                     | 0.0008809  |
| rs10276023  | 7 | 7037349   | A   | 43 | 16 | T                     | 0.00006043 |
| rs4074750   | 7 | 7040309   | T   | 44 | 20 | C                     | 0.0005739  |
| rs4074749   | 7 | 7040475   | C   | 44 | 20 | T                     | 0.0005739  |
| rs4074748   | 7 | 7040500   | C   | 44 | 20 | T                     | 0.0005739  |
| rs6463625   | 7 | 7040611   | C   | 44 | 20 | T                     | 0.0005739  |
| rs6463626   | 7 | 7040695   | T   | 44 | 20 | C                     | 0.0005739  |
| rs6463628   | 7 | 7041258   | A   | 43 | 19 | G                     | 0.0005165  |
| rs2191318   | 7 | 8112014   | C   | 28 | 49 | T                     | 0.0008723  |
| rs4140809   | 7 | 8132006   | T   | 42 | 19 | C                     | 0.0008809  |
| rs2058277   | 7 | 8132877   | T   | 43 | 19 | C                     | 0.0005165  |
| rs2189906   | 7 | 8464974   | G   | 30 | 10 | A                     | 0.0006347  |
| rs2709051   | 7 | 9644581   | A   | 15 | 34 | G                     | 0.0008313  |
| rs969419    | 7 | 14114798  | A   | 23 | 5  | G                     | 0.0003619  |
| rs55909410  | 7 | 20489589  | A   | 21 | 4  | G                     | 0.0004069  |
| rs12667191  | 7 | 21401566  | T   | 0  | 11 | A                     | 0.0002715  |
| rs10950846  | 7 | 21401732  | G   | 0  | 11 | A                     | 0.0002715  |
| rs10486426  | 7 | 21403759  | C   | 0  | 11 | A                     | 0.0002715  |
| rs7780821   | 7 | 21413354  | G   | 1  | 13 | A                     | 0.0005059  |
| rs34927723  | 7 | 21422925  | T   | 2  | 16 | C                     | 0.0003115  |
| rs9691059   | 7 | 21429939  | C   | 4  | 21 | T                     | 0.0001601  |
| rs7810409   | 7 | 21438392  | C   | 2  | 18 | T                     | 0.00007463 |

|             |   |               |    |      |            |
|-------------|---|---------------|----|------|------------|
| rs34079228  | 7 | 21440066 G    | 1  | 13 A | 0.0005059  |
| rs79251582  | 7 | 21440495 AGT  | 2  | 18 A | 0.00007463 |
| rs11979569  | 7 | 21441999 T    | 2  | 18 C | 0.00007463 |
| rs11983219  | 7 | 21442234 C    | 2  | 18 T | 0.00007463 |
| rs73083192  | 7 | 22512008 C    | 25 | 7 T  | 0.0008092  |
| rs73083195  | 7 | 22512641 C    | 25 | 7 T  | 0.0008092  |
| rs73083202  | 7 | 22515488 C    | 25 | 7 A  | 0.0008092  |
| rs79921061  | 7 | 22516287 C    | 25 | 7 A  | 0.0008092  |
| rs55985142  | 7 | 22517874 T    | 25 | 7 C  | 0.0008092  |
| rs56075961  | 7 | 22517890 A    | 25 | 7 T  | 0.0008092  |
| rs73085115  | 7 | 22519251 T    | 26 | 7 C  | 0.0004518  |
| rs73085119  | 7 | 22520389 T    | 26 | 7 C  | 0.0004518  |
| rs73085122  | 7 | 22520686 C    | 26 | 7 G  | 0.0004518  |
| rs73085126  | 7 | 22521162 A    | 26 | 7 G  | 0.0004518  |
| rs17364835  | 7 | 22522178 A    | 26 | 7 C  | 0.0004518  |
| rs73085131  | 7 | 22525284 G    | 25 | 7 A  | 0.0008092  |
| 7:22818527  | 7 | 22818527 T    | 2  | 16 A | 0.0003115  |
| rs73095715  | 7 | 26286936 A    | 2  | 15 G | 0.0006243  |
| rs4722799   | 7 | 28492782 A    | 12 | 32 G | 0.0004387  |
| rs113362450 | 7 | 29594562 T    | 14 | 1 C  | 0.0006347  |
| rs77499142  | 7 | 32007106 G    | 37 | 14 C | 0.0004475  |
| rs117874121 | 7 | 37348682 A    | 18 | 3 G  | 0.0008121  |
| rs75702393  | 7 | 37401837 AT   | 33 | 12 A | 0.0005855  |
| 7:37401838  | 7 | 37401838 ATAT | 33 | 12 A | 0.0005855  |
| rs1987067   | 7 | 37414537 T    | 22 | 5 C  | 0.0006676  |
| rs2329396   | 7 | 39534540 A    | 51 | 27 G | 0.0009437  |
| rs1476702   | 7 | 40924632 G    | 42 | 19 A | 0.0008809  |
| rs62449443  | 7 | 40946739 A    | 12 | 0 T  | 0.0003547  |
| rs6956024   | 7 | 46568634 T    | 20 | 40 G | 0.0008835  |
| rs62452707  | 7 | 46570171 A    | 20 | 40 T | 0.0008835  |
| rs2057869   | 7 | 46572992 A    | 20 | 40 G | 0.0008835  |
| rs723148    | 7 | 46577400 C    | 20 | 40 A | 0.0008835  |
| rs1859519   | 7 | 46579424 C    | 20 | 40 T | 0.0008835  |
| rs12673331  | 7 | 46598061 G    | 20 | 40 A | 0.0008835  |
| rs28783507  | 7 | 46600905 A    | 20 | 40 G | 0.0008835  |
| rs60985485  | 7 | 46603966 CAT  | 20 | 40 C | 0.0008835  |
| rs369251775 | 7 | 47136324 G    | 17 | 2 GA | 0.0004751  |
| rs35341942  | 7 | 47151123 T    | 21 | 2 TA | 0.00002397 |
| rs4557608   | 7 | 47154807 C    | 23 | 4 T  | 0.0001119  |
| rs11767755  | 7 | 47155356 A    | 23 | 4 G  | 0.0001119  |

|             |   |          |   |    |    |                         |              |
|-------------|---|----------|---|----|----|-------------------------|--------------|
| rs2708857   | 7 | 48098986 | C | 0  | 10 | T                       | 0.0005917    |
| 7:48259483  | 7 | 48259483 | C | 9  | 27 | A                       | 0.0003604    |
| 7:52765162  | 7 | 52765162 | C | 1  | 14 | CACGACTTGTTTTGA         | 0.0002433    |
| 7:52765179  | 7 | 52765179 | A | 1  | 14 | AACAGAACACAATAGAAGT     | 0.0002433    |
| rs79990624  | 7 | 52767350 | A | 1  | 13 | C                       | 0.0005059    |
| rs17135257  | 7 | 52768266 | T | 1  | 13 | C                       | 0.0005059    |
| rs73121944  | 7 | 52782137 | T | 1  | 14 | C                       | 0.0002433    |
| rs6949581   | 7 | 52783916 | C | 1  | 14 | T                       | 0.0002433    |
| rs73121956  | 7 | 52786522 | C | 1  | 14 | T                       | 0.0002433    |
| rs115950177 | 7 | 52786585 | A | 1  | 14 | C                       | 0.0002433    |
| 7:52787115  | 7 | 52787115 | C | 1  | 12 | CATATATACACACATATGTATA  | 0.0009301    |
| rs9690813   | 7 | 52788107 | A | 1  | 14 | G                       | 0.0002433    |
| rs73121961  | 7 | 52788814 | C | 1  | 14 | T                       | 0.0002433    |
| rs58303022  | 7 | 52790941 | T | 1  | 14 | C                       | 0.0002433    |
| rs73106208  | 7 | 52791522 | T | 1  | 14 | C                       | 0.0002433    |
| rs1404908   | 7 | 55262627 | T | 20 | 40 | C                       | 0.0008835    |
| rs2740763   | 7 | 55265354 | A | 20 | 40 | T                       | 0.0008835    |
| 7:57958184  | 7 | 57958184 | A | 3  | 17 | G                       | 0.0007114    |
| 7:57958193  | 7 | 57958193 | G | 3  | 17 | T                       | 0.0007114    |
| 7:57958195  | 7 | 57958195 | A | 3  | 17 | C                       | 0.0005686    |
| rs140073039 | 7 | 61100611 | T | 27 | 8  | C                       | 0.0005667    |
| 7:61911025  | 7 | 61911025 | A | 21 | 3  | AG                      | 0.0001132    |
| 7:64556840  | 7 | 64556840 | A | 16 | 2  | AC                      | 0.0007845    |
| rs138614064 | 7 | 66054824 | A | 2  | 15 | G                       | 0.0006952    |
| rs10252133  | 7 | 66065059 | T | 2  | 15 | C                       | 0.0006952    |
| rs143269646 | 7 | 66074643 | T | 1  | 14 | G                       | 0.0002433    |
| rs10235638  | 7 | 66396940 | T | 2  | 15 | C                       | 0.0006243    |
| rs145651753 | 7 | 66730116 | A | 4  | 21 | G                       | 0.0003913    |
| rs11973746  | 7 | 66746001 | A | 4  | 19 | G                       | 0.0005324    |
| rs10551417  | 7 | 71563744 | G | 23 | 4  | GGC                     | 0.00009382   |
| rs59350428  | 7 | 75240405 | A | 26 | 48 | AT                      | 0.000695     |
| rs200981755 | 7 | 79359478 | T | 15 | 46 | TAAATATTTAAAATATTGATTTA | 0.0000003411 |
| rs34952316  | 7 | 81305715 | T | 4  | 19 | G                       | 0.0005969    |
| rs71555095  | 7 | 81311717 | G | 4  | 19 | C                       | 0.0005969    |
| rs13227751  | 7 | 81312093 | C | 4  | 19 | G                       | 0.0005969    |
| rs13228550  | 7 | 81312150 | T | 4  | 19 | C                       | 0.0005969    |
| rs34132214  | 7 | 81312484 | T | 4  | 19 | TC                      | 0.0005969    |
| rs35416833  | 7 | 81312695 | G | 4  | 19 | A                       | 0.0005969    |
| rs35697894  | 7 | 81312705 | C | 4  | 19 | T                       | 0.0005969    |
| rs34187512  | 7 | 81312906 | T | 4  | 19 | G                       | 0.0005969    |

|             |   |          |   |    |    |     |            |
|-------------|---|----------|---|----|----|-----|------------|
| rs1429746   | 7 | 85005259 | A | 40 | 17 | G   | 0.0006981  |
| rs9640962   | 7 | 85005612 | C | 37 | 14 | A   | 0.0004475  |
| rs35553509  | 7 | 85005734 | T | 37 | 14 | TC  | 0.0004475  |
| rs13228617  | 7 | 85006563 | A | 37 | 14 | G   | 0.0004475  |
| 7:85006794  | 7 | 85006794 | A | 36 | 12 | AAT | 0.0001705  |
| rs67336694  | 7 | 85006795 | A | 14 | 38 | AT  | 0.00003336 |
| rs374778279 | 7 | 85006798 | A | 10 | 35 | AAT | 0.0000102  |
| rs2435272   | 7 | 85007066 | T | 21 | 47 | G   | 0.00002923 |
| rs2463468   | 7 | 85009349 | T | 21 | 47 | C   | 0.00002923 |
| rs12333803  | 7 | 85011100 | A | 37 | 14 | G   | 0.0004475  |
| rs6951365   | 7 | 85012428 | A | 37 | 14 | T   | 0.0004475  |
| rs10234933  | 7 | 85013956 | G | 37 | 14 | A   | 0.0004475  |
| rs2030624   | 7 | 85013958 | C | 21 | 47 | T   | 0.00002923 |
| rs1403786   | 7 | 85014355 | C | 37 | 14 | T   | 0.0004475  |
| rs2463475   | 7 | 85016000 | T | 21 | 47 | C   | 0.00002923 |
| rs2462058   | 7 | 85019297 | T | 21 | 47 | A   | 0.00002923 |
| rs1589708   | 7 | 85021022 | T | 37 | 14 | C   | 0.0004475  |
| rs35429293  | 7 | 85021116 | T | 37 | 14 | A   | 0.0004475  |
| rs34643208  | 7 | 85021633 | C | 37 | 14 | T   | 0.0004475  |
| rs1403785   | 7 | 85021953 | A | 21 | 47 | G   | 0.00002923 |
| rs2462057   | 7 | 85024037 | T | 21 | 47 | C   | 0.00002923 |
| rs1960550   | 7 | 85024643 | T | 21 | 47 | C   | 0.00002923 |
| rs2077770   | 7 | 85026097 | T | 21 | 47 | A   | 0.00002923 |
| rs12666995  | 7 | 85026991 | C | 37 | 14 | T   | 0.0004475  |
| rs2463478   | 7 | 85030592 | G | 21 | 47 | T   | 0.00002923 |
| rs13236638  | 7 | 85033062 | T | 37 | 14 | C   | 0.0004475  |
| rs7783195   | 7 | 85033683 | T | 37 | 14 | C   | 0.0004475  |
| rs1583081   | 7 | 85034227 | T | 21 | 47 | G   | 0.00002923 |
| rs13227430  | 7 | 85035874 | C | 37 | 14 | A   | 0.0004475  |
| rs2463480   | 7 | 85036389 | T | 21 | 47 | C   | 0.00002923 |
| rs2435264   | 7 | 85036405 | T | 21 | 47 | A   | 0.00002923 |
| rs2463481   | 7 | 85037374 | G | 19 | 42 | A   | 0.0001482  |
| rs17159908  | 7 | 85042188 | A | 37 | 14 | G   | 0.0004475  |
| rs148525782 | 7 | 85045118 | A | 21 | 47 | AT  | 0.00002923 |
| rs112461735 | 7 | 85045121 | C | 21 | 47 | A   | 0.00002923 |
| rs7794512   | 7 | 85045881 | A | 19 | 42 | G   | 0.0001482  |
| rs34140074  | 7 | 85054102 | A | 31 | 52 | AT  | 0.0009496  |
| rs11768400  | 7 | 85055535 | G | 19 | 39 | A   | 0.0007998  |
| rs1589707   | 7 | 85056320 | A | 19 | 39 | G   | 0.0007998  |
| rs6465004   | 7 | 85056906 | C | 19 | 39 | T   | 0.0007998  |



|             |   |                           |    |       |           |
|-------------|---|---------------------------|----|-------|-----------|
| rs1829902   | 7 | 85057001 C                | 31 | 52 G  | 0.0009496 |
| rs35288706  | 7 | 85058425 GA               | 31 | 52 G  | 0.0009496 |
| rs34970164  | 7 | 85058967 GA               | 31 | 52 G  | 0.0009496 |
| rs12704128  | 7 | 85059181 A                | 31 | 52 G  | 0.0009496 |
| rs2115746   | 7 | 85063464 G                | 19 | 39 A  | 0.0007998 |
| rs13237273  | 7 | 85063736 C                | 31 | 52 T  | 0.0009496 |
| rs10952847  | 7 | 85064804 C                | 31 | 52 T  | 0.0009496 |
| rs17159934  | 7 | 85070736 A                | 30 | 52 C  | 0.00054   |
| rs17159935  | 7 | 85070949 A                | 30 | 52 C  | 0.00054   |
| rs1560315   | 7 | 85075150 G                | 30 | 52 C  | 0.00054   |
| rs11762648  | 7 | 85077205 T                | 18 | 39 C  | 0.0004141 |
| rs10499888  | 7 | 85078623 A                | 31 | 52 G  | 0.0009496 |
| rs73193990  | 7 | 85079015 A                | 31 | 52 G  | 0.0009496 |
| rs12704129  | 7 | 85079348 A                | 19 | 39 T  | 0.0007998 |
| rs11769386  | 7 | 85083869 C                | 18 | 39 G  | 0.0004141 |
| rs35523949  | 7 | 85085202 G                | 31 | 52 A  | 0.0009496 |
| rs143204611 | 7 | 85086268 TTTAATTATGGTCTGG | 30 | 52 T  | 0.00054   |
| rs35922536  | 7 | 85091656 G                | 18 | 39 A  | 0.0004141 |
| rs35295520  | 7 | 85091841 G                | 30 | 52 GA | 0.00054   |
| rs13240019  | 7 | 85097468 T                | 19 | 39 C  | 0.0007998 |
| rs2462051   | 7 | 85099770 G                | 24 | 45 T  | 0.0007128 |
| rs2462049   | 7 | 85099898 G                | 25 | 47 T  | 0.0004398 |
| rs4728797   | 7 | 88664515 C                | 36 | 14 T  | 0.0007756 |
| rs34691685  | 7 | 88709608 T                | 36 | 13 TA | 0.0003885 |
| rs34120249  | 7 | 88716652 T                | 36 | 14 TA | 0.0007756 |
| rs10282116  | 7 | 94566679 T                | 26 | 48 C  | 0.0004647 |
| rs10246268  | 7 | 94567965 A                | 27 | 48 T  | 0.0008377 |
| rs854717    | 7 | 94593140 A                | 27 | 48 G  | 0.0008377 |
| rs11981513  | 7 | 94648239 A                | 57 | 31 G  | 0.0003656 |
| 7:96459804  | 7 | 96459804 C                | 0  | 10 A  | 0.0005917 |
| rs10226446  | 7 | 98832759 T                | 3  | 18 C  | 0.0003291 |
| rs2396112   | 7 | 109126187 T               | 27 | 6 C   | 0.0000877 |
| rs61005954  | 7 | 109925479 C               | 28 | 9 G   | 0.0008484 |
| rs38756     | 7 | 109939445 T               | 28 | 8 G   | 0.0003544 |
| rs139582502 | 7 | 111450919 G               | 0  | 11 A  | 0.0002715 |
| 7:123237974 | 7 | 123237974 GTGTGTGTGTA     | 0  | 11 G  | 0.0007003 |
| rs200944680 | 7 | 124821228 G               | 40 | 17 C  | 0.0006981 |
| rs201895570 | 7 | 124821237 G               | 40 | 17 C  | 0.0006981 |
| rs12532812  | 7 | 124859997 A               | 41 | 17 C  | 0.0004047 |
| rs9649011   | 7 | 125202672 G               | 23 | 47 A  | 0.0002094 |

|             |                |    |           |            |
|-------------|----------------|----|-----------|------------|
| rs2694006   | 7 125203203 C  | 22 | 45 T      | 0.0002011  |
| rs792416    | 7 125203939 T  | 22 | 46 G      | 0.0001115  |
| rs5887245   | 7 125207215 G  | 23 | 45 GACTTT | 0.0003849  |
| rs2692072   | 7 125211768 T  | 23 | 44 G      | 0.0006657  |
| rs792160    | 7 125214809 A  | 23 | 44 T      | 0.0006657  |
| rs792162    | 7 125216928 T  | 23 | 44 C      | 0.0006657  |
| rs813781    | 7 125219237 A  | 23 | 44 G      | 0.0006657  |
| rs1833082   | 7 125219904 G  | 22 | 44 A      | 0.0003557  |
| rs1833083   | 7 125219953 C  | 23 | 44 T      | 0.0006657  |
| rs34587897  | 7 125220184 GA | 23 | 44 G      | 0.0006657  |
| rs35958199  | 7 125225669 GT | 22 | 43 G      | 0.0006167  |
| rs792191    | 7 125225892 C  | 23 | 44 G      | 0.0006657  |
| rs792195    | 7 125227341 G  | 23 | 44 A      | 0.0006657  |
| rs792196    | 7 125228133 G  | 23 | 44 T      | 0.0006657  |
| rs792197    | 7 125228294 T  | 23 | 44 C      | 0.0006657  |
| rs792200    | 7 125230303 C  | 23 | 44 T      | 0.0006657  |
| rs34672743  | 7 125231418 A  | 23 | 44 AT     | 0.0006657  |
| rs2524888   | 7 125234107 G  | 23 | 44 A      | 0.0006657  |
| rs986279    | 7 125235239 G  | 23 | 44 A      | 0.0006657  |
| rs792171    | 7 125238557 G  | 23 | 44 A      | 0.0006657  |
| rs792172    | 7 125238890 G  | 23 | 44 C      | 0.0006657  |
| rs7780182   | 7 125254448 A  | 32 | 53 G      | 0.0009656  |
| rs7790718   | 7 125256543 C  | 32 | 53 G      | 0.0009656  |
| rs35729604  | 7 125262935 C  | 33 | 54 CT     | 0.0009764  |
| rs4731257   | 7 125266497 A  | 33 | 54 G      | 0.0009764  |
| rs140321097 | 7 125280738 T  | 31 | 52 TATATA | 0.0009496  |
| rs17149636  | 7 126018952 G  | 8  | 25 A      | 0.000871   |
| rs756969    | 7 126051716 G  | 8  | 25 T      | 0.000871   |
| rs2107740   | 7 139865545 C  | 57 | 32 G      | 0.0006468  |
| rs11440764  | 7 139865645 G  | 50 | 25 GA     | 0.000499   |
| rs2189852   | 7 139870793 A  | 50 | 25 G      | 0.000499   |
| rs1005261   | 7 139884494 G  | 50 | 26 A      | 0.0008986  |
| rs6464585   | 7 139896424 T  | 54 | 29 A      | 0.0006016  |
| rs6947196   | 7 139898709 T  | 57 | 32 C      | 0.0006468  |
| rs58730464  | 7 139934900 T  | 9  | 27 C      | 0.000654   |
| rs117919318 | 7 140083539 T  | 24 | 4 C       | 0.00005751 |
| rs10225228  | 7 141687327 C  | 0  | 11 T      | 0.0002715  |
| 7:142196523 | 7 142196523 AC | 0  | 10 A      | 0.0005917  |
| 7:142196526 | 7 142196526 G  | 0  | 10 C      | 0.0005917  |
| 7:142196533 | 7 142196533 G  | 0  | 10 A      | 0.0005917  |

|             |                 |    |        |             |
|-------------|-----------------|----|--------|-------------|
| rs13234300  | 7 144882368 A   | 27 | 5 G    | 0.00002724  |
| rs10228815  | 7 144882889 G   | 25 | 5 T    | 0.00009108  |
| rs71528967  | 7 144884334 A   | 26 | 5 G    | 0.00005306  |
| rs7799776   | 7 144888698 T   | 26 | 5 C    | 0.00005306  |
| rs7788595   | 7 144893242 A   | 26 | 5 C    | 0.00005306  |
| rs34694182  | 7 144893767 A   | 28 | 7 AT   | 0.0001348   |
| rs2371843   | 7 144895554 A   | 23 | 4 G    | 0.0001119   |
| rs2371844   | 7 144895575 A   | 23 | 4 G    | 0.0001119   |
| rs12703663  | 7 144895979 G   | 23 | 4 A    | 0.0001119   |
| rs13247774  | 7 144896721 A   | 23 | 4 G    | 0.0001119   |
| rs71528968  | 7 144901501 T   | 26 | 7 C    | 0.0004518   |
| rs150195176 | 7 144911246 T   | 23 | 4 C    | 0.0001119   |
| rs12703667  | 7 144915712 T   | 23 | 5 C    | 0.0003619   |
| rs139336131 | 7 144935515 A   | 16 | 2 G    | 0.0007845   |
| rs12703668  | 7 144938998 C   | 22 | 4 T    | 0.0002148   |
| rs66706284  | 7 144946452 A   | 23 | 4 G    | 0.0001119   |
| rs73170827  | 7 144947604 T   | 18 | 3 A    | 0.0008121   |
| rs34223395  | 7 144950375 T   | 23 | 4 C    | 0.0001119   |
| rs12703672  | 7 144965537 C   | 23 | 5 A    | 0.0003619   |
| rs11971766  | 7 149017964 C   | 49 | 24 T   | 0.0004678   |
| 7:151092596 | 7 151092596 CGG | 12 | 0 C    | 0.0003422   |
| rs6967853   | 7 152737574 C   | 6  | 22 T   | 0.0007921   |
| rs6967855   | 7 152737578 C   | 6  | 22 T   | 0.0007921   |
| rs954360    | 7 152737659 T   | 6  | 22 C   | 0.0007921   |
| rs3898061   | 7 152737701 A   | 6  | 22 G   | 0.0007921   |
| rs954359    | 7 152737733 C   | 6  | 22 T   | 0.0007921   |
| rs11388703  | 7 152738308 T   | 6  | 22 TG  | 0.0007921   |
| rs143970329 | 7 153517490 G   | 22 | 5 T    | 0.0006676   |
| rs11451890  | 7 153520700 G   | 36 | 14 GT  | 0.0007756   |
| rs4725514   | 7 153520711 C   | 36 | 14 A   | 0.0007756   |
| rs2622260   | 7 153521183 A   | 37 | 13 G   | 0.0002102   |
| rs6464368   | 7 153521224 G   | 37 | 13 A   | 0.0002102   |
| rs7795045   | 7 153521738 T   | 37 | 13 C   | 0.0002102   |
| rs13223976  | 7 154976046 C   | 26 | 55 T   | 0.000005709 |
| rs61507403  | 7 154976104 G   | 38 | 13 A   | 0.0001161   |
| rs113045737 | 7 154976533 T   | 38 | 13 G   | 0.0001161   |
| rs12537781  | 7 154978183 T   | 35 | 13 C   | 0.0006539   |
| rs6597471   | 7 154978788 G   | 27 | 55 C   | 0.00001197  |
| rs6597473   | 7 154978979 A   | 27 | 55 G   | 0.00001197  |
| 7:154979133 | 7 154979133 C   | 27 | 55 CTT | 0.00001197  |

|             |                 |    |                 |             |
|-------------|-----------------|----|-----------------|-------------|
| 7:154979135 | 7 154979135 C   | 27 | 55 CTGCCTCATTGG | 0.00001197  |
| rs4960695   | 7 154979628 A   | 27 | 55 C            | 0.00001197  |
| rs4960696   | 7 154979643 C   | 27 | 55 T            | 0.00001197  |
| rs7782593   | 7 154979894 C   | 27 | 54 G            | 0.0000235   |
| rs7794634   | 7 154980152 T   | 26 | 55 C            | 0.000005709 |
| rs7804702   | 7 154980153 G   | 27 | 55 A            | 0.00001197  |
| rs7790169   | 7 154980168 A   | 27 | 55 G            | 0.00001197  |
| rs7790310   | 7 154980243 A   | 27 | 55 G            | 0.00001197  |
| rs10279840  | 7 154980616 A   | 26 | 55 C            | 0.000005709 |
| rs10274085  | 7 154980631 C   | 27 | 55 T            | 0.00001197  |
| rs58225134  | 7 154980766 T   | 35 | 13 C            | 0.0006539   |
| rs35191725  | 7 154980990 T   | 27 | 55 C            | 0.00001197  |
| rs11975494  | 7 154981034 G   | 27 | 55 C            | 0.00001197  |
| rs11978131  | 7 154981062 A   | 35 | 13 C            | 0.0006539   |
| rs4273809   | 7 154981157 A   | 27 | 55 G            | 0.00001197  |
| rs1465783   | 7 154981313 A   | 27 | 55 T            | 0.00001197  |
| rs1465784   | 7 154981331 G   | 27 | 55 A            | 0.00001197  |
| rs11243341  | 7 154981454 T   | 27 | 55 C            | 0.00001197  |
| rs6597474   | 7 154981756 T   | 27 | 55 G            | 0.00001197  |
| rs6597475   | 7 154981760 G   | 27 | 55 A            | 0.00001197  |
| rs117945097 | 7 154982295 T   | 21 | 41 C            | 0.0009669   |
| rs11982355  | 7 154984001 C   | 37 | 15 A            | 0.0009053   |
| rs35656216  | 7 154997261 A   | 32 | 57 AC           | 0.00009501  |
| rs11762374  | 7 154997735 G   | 27 | 52 A            | 0.00008446  |
| rs35593222  | 7 154997767 CTG | 27 | 52 C            | 0.00008446  |
| rs35294146  | 7 154997789 T   | 27 | 52 TTTGC        | 0.00008446  |
| rs34246874  | 7 154997831 T   | 27 | 52 TGA          | 0.0002194   |
| 7:154997859 | 7 154997859 AAT | 27 | 52 A            | 0.00008446  |
| rs11766437  | 7 154997860 G   | 27 | 52 A            | 0.00008446  |
| rs35092901  | 7 154997864 G   | 27 | 52 GCA          | 0.00008446  |
| rs34316776  | 7 154997901 T   | 27 | 52 TGA          | 0.00008446  |
| rs71895605  | 7 154997965 AGT | 28 | 52 A            | 0.0001612   |
| rs56388829  | 7 154997975 CGT | 27 | 52 C            | 0.00003426  |
| 7:154997978 | 7 154997978 G   | 27 | 52 GTGTGTT      | 0.00008446  |
| rs34406403  | 7 154998031 C   | 27 | 52 T            | 0.00008446  |
| rs34544564  | 7 154998178 A   | 34 | 57 G            | 0.0002058   |
| rs12719664  | 7 154998349 C   | 32 | 57 T            | 0.00009501  |
| rs4960580   | 7 154998951 T   | 27 | 52 C            | 0.00008446  |
| rs4960581   | 7 154998952 G   | 27 | 52 A            | 0.00008446  |
| rs11768317  | 7 154999104 T   | 27 | 52 C            | 0.00008446  |

|             |   |           |                      |    |    |    |            |
|-------------|---|-----------|----------------------|----|----|----|------------|
| rs11763457  | 7 | 154999108 | G                    | 27 | 52 | A  | 0.00008446 |
| rs34931632  | 7 | 154999339 | T                    | 28 | 51 | C  | 0.0008049  |
| rs13306879  | 7 | 155000929 | A                    | 26 | 52 | G  | 0.00004297 |
| rs13231870  | 7 | 155001121 | C                    | 27 | 52 | G  | 0.00008446 |
| rs12719667  | 7 | 155002319 | A                    | 26 | 52 | G  | 0.00004297 |
| rs12719668  | 7 | 155002664 | A                    | 27 | 52 | C  | 0.00008446 |
| rs11766971  | 7 | 155002747 | C                    | 57 | 31 | T  | 0.0003656  |
| rs11243344  | 7 | 155003395 | G                    | 57 | 31 | A  | 0.0003656  |
| rs11521121  | 7 | 155003436 | C                    | 57 | 31 | T  | 0.0003656  |
| rs11515018  | 7 | 155003562 | C                    | 27 | 52 | T  | 0.00008446 |
| rs722467    | 7 | 155003909 | C                    | 57 | 31 | A  | 0.0003656  |
| rs722465    | 7 | 155003983 | C                    | 57 | 31 | T  | 0.0003656  |
| rs722466    | 7 | 155004242 | A                    | 26 | 52 | G  | 0.00004297 |
| rs893107    | 7 | 155004336 | C                    | 57 | 31 | T  | 0.0003656  |
| rs893106    | 7 | 155004371 | G                    | 26 | 52 | C  | 0.00004297 |
| rs893105    | 7 | 155004502 | A                    | 57 | 31 | G  | 0.0003656  |
| rs2317169   | 7 | 155004567 | T                    | 57 | 31 | A  | 0.0003656  |
| rs2317168   | 7 | 155004733 | C                    | 57 | 31 | T  | 0.0003656  |
| rs2317166   | 7 | 155004783 | A                    | 57 | 31 | G  | 0.0003656  |
| rs2317165   | 7 | 155004833 | T                    | 26 | 52 | C  | 0.00004297 |
| rs2076919   | 7 | 155005098 | A                    | 57 | 31 | G  | 0.0003656  |
| rs1106540   | 7 | 155005209 | G                    | 57 | 31 | A  | 0.0003656  |
| rs12719690  | 7 | 155009761 | A                    | 27 | 48 | G  | 0.0008377  |
| rs6943455   | 7 | 155011946 | C                    | 31 | 56 | T  | 0.00009427 |
| rs76207723  | 7 | 155018817 | T                    | 20 | 3  | C  | 0.0002211  |
| 7:155817937 | 7 | 155817937 | TGTGTGTGTGGGTGGGTGGG | 15 | 1  | T  | 0.0003322  |
| rs36015218  | 7 | 158069312 | G                    | 29 | 9  | GC | 0.000837   |
| rs114651407 | 8 | 5146438   | C                    | 0  | 10 | T  | 0.0005917  |
| rs4875706   | 8 | 6042598   | T                    | 22 | 44 | C  | 0.0003557  |
| rs10106314  | 8 | 6043416   | G                    | 22 | 44 | T  | 0.0003557  |
| rs9644299   | 8 | 6044660   | C                    | 22 | 44 | T  | 0.0003557  |
| rs9314596   | 8 | 6044784   | A                    | 22 | 44 | T  | 0.0003557  |
| rs2552205   | 8 | 6044988   | C                    | 19 | 41 | G  | 0.0004457  |
| rs2570648   | 8 | 6046026   | C                    | 22 | 44 | G  | 0.0003557  |
| rs2552207   | 8 | 6046104   | G                    | 22 | 44 | C  | 0.0003557  |
| rs2570647   | 8 | 6046150   | C                    | 22 | 44 | A  | 0.0003557  |
| rs34935564  | 8 | 6047368   | ATT                  | 22 | 44 | A  | 0.0003557  |
| rs34662381  | 8 | 6047903   | A                    | 22 | 44 | G  | 0.0003557  |
| rs144571109 | 8 | 6051763   | G                    | 28 | 49 | C  | 0.0008723  |
| rs2442591   | 8 | 6408216   | A                    | 2  | 15 | T  | 0.0006243  |

|             |   |                            |    |         |             |
|-------------|---|----------------------------|----|---------|-------------|
| rs4840457   | 8 | 6408682 C                  | 1  | 13 T    | 0.0005059   |
| rs4841262   | 8 | 6408683 G                  | 1  | 13 A    | 0.0005059   |
| rs10708602  | 8 | 6408750 A                  | 4  | 20 AT   | 0.0003114   |
| rs12543837  | 8 | 6413948 G                  | 4  | 20 A    | 0.0003114   |
| rs12546072  | 8 | 6414067 A                  | 4  | 21 G    | 0.0001601   |
| rs2515504   | 8 | 6414226 C                  | 4  | 21 T    | 0.0001601   |
| rs17624022  | 8 | 6414682 C                  | 4  | 21 A    | 0.0001601   |
| rs74417083  | 8 | 6415206 A                  | 4  | 21 G    | 0.0001372   |
| rs12545089  | 8 | 6415257 G                  | 4  | 21 T    | 0.0001601   |
| rs370141139 | 8 | 6417065 A                  | 4  | 21 C    | 0.0001601   |
| rs141510915 | 8 | 6417067 CAA                | 4  | 21 C    | 0.0001601   |
| rs67706592  | 8 | 6417068 CTA                | 4  | 21 C    | 0.0001601   |
| rs78829996  | 8 | 6417364 C                  | 1  | 14 T    | 0.0002433   |
| rs73661404  | 8 | 6417771 C                  | 4  | 21 T    | 0.0001601   |
| rs12547077  | 8 | 6417834 C                  | 4  | 21 T    | 0.0001601   |
| rs921291    | 8 | 6417876 A                  | 4  | 21 C    | 0.0001601   |
| rs11996740  | 8 | 6418830 A                  | 4  | 20 G    | 0.0003114   |
| rs3739391   | 8 | 6420534 A                  | 5  | 20 G    | 0.0009659   |
| rs3739392   | 8 | 6420574 G                  | 4  | 19 A    | 0.0005969   |
| rs2442528   | 8 | 6423992 G                  | 5  | 20 A    | 0.0009659   |
| rs2442532   | 8 | 6424286 T                  | 5  | 20 C    | 0.0009659   |
| rs2442548   | 8 | 6425184 C                  | 5  | 20 G    | 0.0009659   |
| rs2515514   | 8 | 6427055 A                  | 5  | 20 T    | 0.0009659   |
| rs2515516   | 8 | 6430340 C                  | 4  | 19 G    | 0.0005969   |
| rs2442553   | 8 | 6430770 A                  | 4  | 19 T    | 0.0005969   |
| rs79031630  | 8 | 6431167 G                  | 4  | 19 GA   | 0.0005969   |
| rs2442557   | 8 | 6433406 C                  | 5  | 21 G    | 0.0005184   |
| rs2959778   | 8 | 6434185 C                  | 8  | 26 T    | 0.0004835   |
| rs2442590   | 8 | 6434895 A                  | 1  | 16 G    | 0.00005445  |
| 8:9113931   | 8 | 9113931 C                  | 1  | 21 T    | 0.000001269 |
| 8:10442680  | 8 | 10442680 G                 | 4  | 20 GT   | 0.0003114   |
| 8:10442682  | 8 | 10442682 G                 | 4  | 20 GTGT | 0.0003114   |
| 8:10442683  | 8 | 10442683 A                 | 4  | 20 T    | 0.0003114   |
| rs67367418  | 8 | 13660898 T                 | 15 | 34 TC   | 0.0008313   |
| rs12676512  | 8 | 13661548 T                 | 15 | 34 C    | 0.0008313   |
| rs34389480  | 8 | 13979844 A                 | 51 | 27 C    | 0.0009437   |
| rs10658484  | 8 | 13980338 T                 | 51 | 27 TATC | 0.0009437   |
| rs34078873  | 8 | 13980364 G                 | 51 | 27 A    | 0.0009437   |
| rs59464798  | 8 | 18578805 AAGGGGTGGGAAGGCAC | 53 | 28 A    | 0.0009334   |
| rs73206580  | 8 | 19698505 G                 | 0  | 10 A    | 0.0005917   |

|             |   |          |                       |    |    |               |           |
|-------------|---|----------|-----------------------|----|----|---------------|-----------|
| rs4871974   | 8 | 22084221 | A                     | 25 | 5  | G             | 0.000102  |
| rs377610860 | 8 | 27236131 | C                     | 30 | 10 | T             | 0.0006347 |
| rs12681090  | 8 | 28087891 | C                     | 21 | 41 | T             | 0.0009669 |
| rs12678500  | 8 | 28088201 | T                     | 21 | 41 | C             | 0.0009669 |
| rs12549755  | 8 | 28089596 | C                     | 21 | 41 | T             | 0.0009669 |
| rs11783771  | 8 | 28091463 | A                     | 21 | 41 | C             | 0.0009669 |
| rs7816330   | 8 | 28093152 | T                     | 21 | 41 | G             | 0.0009669 |
| rs7817972   | 8 | 28093589 | A                     | 21 | 41 | C             | 0.0009669 |
| rs6996068   | 8 | 28094807 | T                     | 21 | 41 | C             | 0.0009669 |
| rs10099875  | 8 | 28095050 | C                     | 21 | 41 | A             | 0.0009669 |
| rs10112778  | 8 | 28095291 | A                     | 21 | 41 | G             | 0.0009669 |
| rs7012040   | 8 | 28096371 | T                     | 21 | 41 | C             | 0.0009669 |
| rs7010836   | 8 | 28096383 | A                     | 21 | 41 | G             | 0.0009669 |
| rs7002331   | 8 | 28096888 | C                     | 21 | 41 | T             | 0.0009669 |
| rs7008686   | 8 | 28098720 | G                     | 24 | 45 | A             | 0.0007128 |
| rs9886609   | 8 | 28099383 | A                     | 21 | 41 | C             | 0.0009669 |
| rs9886614   | 8 | 28099667 | G                     | 21 | 41 | C             | 0.0009669 |
| rs9886492   | 8 | 28099770 | G                     | 21 | 41 | A             | 0.0009669 |
| rs10098959  | 8 | 28100307 | C                     | 21 | 41 | A             | 0.0009669 |
| rs33927304  | 8 | 28106349 | C                     | 21 | 41 | CG            | 0.0009669 |
| rs67133221  | 8 | 28107702 | A                     | 21 | 41 | AGCTT         | 0.0009669 |
| rs5890733   | 8 | 33391839 | T                     | 11 | 0  | TG            | 0.0007086 |
| rs78644235  | 8 | 33401574 | AT                    | 12 | 0  | A             | 0.0003422 |
| rs80205709  | 8 | 33466818 | T                     | 11 | 0  | C             | 0.0007274 |
| 8:37007617  | 8 | 37007617 | TATACACATATATATCATATA | 18 | 38 | T             | 0.0007166 |
| 8:37007644  | 8 | 37007644 | CATATACATGATATATATCA1 | 17 | 39 | C             | 0.0001615 |
| rs2588065   | 8 | 54052006 | C                     | 56 | 31 | T             | 0.0006352 |
| rs2588061   | 8 | 54053143 | G                     | 56 | 31 | T             | 0.0006352 |
| rs1346115   | 8 | 54058042 | G                     | 56 | 31 | A             | 0.0006352 |
| rs2553887   | 8 | 54061485 | T                     | 56 | 31 | A             | 0.0006352 |
| rs58532315  | 8 | 54063875 | T                     | 57 | 32 | TA            | 0.0006468 |
| rs1365096   | 8 | 54078097 | A                     | 56 | 31 | T             | 0.0006352 |
| rs1425911   | 8 | 54079284 | A                     | 56 | 31 | G             | 0.0006352 |
| rs148996977 | 8 | 55420141 | A                     | 52 | 30 | ACTTTCTTTCTTG | 0.0007849 |
| rs66772979  | 8 | 55453589 | A                     | 22 | 43 | G             | 0.0006167 |
| rs117033707 | 8 | 55603134 | C                     | 0  | 11 | G             | 0.0002715 |
| rs75736542  | 8 | 55670027 | T                     | 0  | 10 | C             | 0.0005917 |
| rs144337474 | 8 | 55716390 | C                     | 0  | 11 | G             | 0.0002715 |
| rs62516880  | 8 | 56789408 | T                     | 15 | 1  | C             | 0.0003131 |
| rs11996440  | 8 | 56789956 | T                     | 15 | 1  | C             | 0.0003131 |

|             |   |                |    |              |            |
|-------------|---|----------------|----|--------------|------------|
| rs74464209  | 8 | 56792994 G     | 15 | 1 C          | 0.0003131  |
| rs118102319 | 8 | 63536600 T     | 3  | 18 C         | 0.0003291  |
| rs10957278  | 8 | 64194195 G     | 20 | 42 A         | 0.0002952  |
| rs7462877   | 8 | 64201960 C     | 26 | 47 G         | 0.0007993  |
| rs13273312  | 8 | 64204622 A     | 26 | 47 C         | 0.0007993  |
| rs7459968   | 8 | 64205487 T     | 28 | 51 C         | 0.0002892  |
| rs13250946  | 8 | 64206351 C     | 28 | 52 G         | 0.0001612  |
| rs147167979 | 8 | 64207845 C     | 28 | 52 CACACACAT | 0.0001612  |
| rs62509184  | 8 | 64209904 C     | 21 | 41 G         | 0.0009669  |
| rs7459685   | 8 | 64210501 C     | 31 | 54 A         | 0.0003134  |
| rs7459882   | 8 | 64211222 G     | 29 | 53 A         | 0.0001666  |
| rs5891898   | 8 | 64212297 T     | 28 | 53 TGC       | 0.00008787 |
| rs13266776  | 8 | 64213227 G     | 29 | 50 C         | 0.0009027  |
| rs12549693  | 8 | 64213235 C     | 30 | 51 A         | 0.0009286  |
| 8:66332579  | 8 | 66332579 A     | 14 | 0 G          | 0.00007436 |
| rs35524685  | 8 | 67248656 ATG   | 32 | 10 A         | 0.0001942  |
| rs10808755  | 8 | 68516681 T     | 49 | 25 G         | 0.00085    |
| rs11781284  | 8 | 68517124 T     | 49 | 25 C         | 0.00085    |
| rs7818863   | 8 | 68518795 T     | 49 | 25 C         | 0.00085    |
| rs408802    | 8 | 68523594 T     | 49 | 25 C         | 0.00085    |
| rs379025    | 8 | 68526546 T     | 49 | 25 G         | 0.00085    |
| rs5009543   | 8 | 69883776 T     | 43 | 18 A         | 0.0002635  |
| rs57385713  | 8 | 70398557 T     | 42 | 19 TA        | 0.0008809  |
| rs34587091  | 8 | 70398666 GA    | 42 | 19 G         | 0.0008809  |
| rs2704033   | 8 | 70399367 T     | 42 | 19 C         | 0.0008809  |
| rs62518663  | 8 | 72723754 C     | 33 | 12 T         | 0.0005855  |
| rs10108922  | 8 | 72724089 C     | 33 | 12 T         | 0.0005855  |
| rs28460598  | 8 | 72729815 T     | 33 | 12 C         | 0.0005855  |
| rs61670134  | 8 | 72739815 C     | 33 | 12 G         | 0.0005855  |
| rs62518682  | 8 | 72739855 T     | 33 | 12 C         | 0.0005855  |
| rs139658753 | 8 | 72740975 TTCTC | 33 | 12 T         | 0.0005855  |
| rs11346090  | 8 | 73740051 C     | 21 | 43 CT        | 0.0008565  |
| rs60648779  | 8 | 75575094 T     | 0  | 11 TG        | 0.0007003  |
| rs34445833  | 8 | 80770915 C     | 54 | 27 G         | 0.000181   |
| rs10955649  | 8 | 87055718 T     | 18 | 38 G         | 0.0007166  |
| rs77155700  | 8 | 89853307 C     | 4  | 21 T         | 0.0001601  |
| rs79954560  | 8 | 89859652 T     | 4  | 21 C         | 0.0001601  |
| rs148963199 | 8 | 89861554 A     | 4  | 20 C         | 0.0003114  |
| rs141566638 | 8 | 89861558 A     | 4  | 20 C         | 0.0003114  |
| rs140507702 | 8 | 89861766 C     | 5  | 21 T         | 0.0005184  |



|             |   |               |   |      |           |
|-------------|---|---------------|---|------|-----------|
| rs6994018   | 8 | 89863807 C    | 5 | 21 T | 0.0005184 |
| rs78487328  | 8 | 89868341 A    | 4 | 20 G | 0.0003114 |
| rs370170108 | 8 | 89868860 T    | 4 | 21 C | 0.0001601 |
| 8:89869753  | 8 | 89869753 C    | 4 | 21 T | 0.0001601 |
| rs148238781 | 8 | 89870444 A    | 4 | 20 G | 0.0003114 |
| rs7841185   | 8 | 89871813 A    | 4 | 21 G | 0.0001601 |
| rs2454338   | 8 | 89872798 T    | 4 | 20 G | 0.0003114 |
| rs2464419   | 8 | 89876276 C    | 4 | 20 T | 0.0003114 |
| rs74305800  | 8 | 89879504 A    | 4 | 20 G | 0.0003114 |
| rs113304118 | 8 | 89879992 C    | 3 | 19 G | 0.0001617 |
| rs2454347   | 8 | 89880356 A    | 4 | 20 G | 0.0003114 |
| rs77504040  | 8 | 89881264 G    | 4 | 20 A | 0.0003114 |
| rs2454340   | 8 | 89886314 T    | 4 | 20 A | 0.0003114 |
| rs7006924   | 8 | 89888775 C    | 4 | 20 T | 0.0003114 |
| rs79707489  | 8 | 89889047 T    | 4 | 20 A | 0.0003114 |
| rs17360267  | 8 | 89891244 T    | 4 | 20 C | 0.0003114 |
| rs1391629   | 8 | 89891698 G    | 4 | 21 A | 0.0001601 |
| rs79888923  | 8 | 89896133 A    | 4 | 21 T | 0.0001601 |
| rs142214846 | 8 | 89896412 GA   | 4 | 21 G | 0.0001601 |
| rs79450712  | 8 | 89897429 C    | 4 | 21 T | 0.0001601 |
| rs79342344  | 8 | 89897987 C    | 4 | 21 A | 0.0001601 |
| rs12545589  | 8 | 89898996 G    | 4 | 21 A | 0.0001601 |
| rs149454363 | 8 | 89899264 TTTC | 4 | 20 T | 0.0003114 |
| rs78224495  | 8 | 89899505 T    | 4 | 20 A | 0.0003114 |
| rs112165299 | 8 | 89900231 A    | 4 | 20 G | 0.0003114 |
| rs13261365  | 8 | 89900493 A    | 4 | 19 T | 0.0005969 |
| rs12544103  | 8 | 89902391 G    | 4 | 20 A | 0.0003114 |
| rs147814724 | 8 | 89902943 TA   | 4 | 20 T | 0.0003114 |
| rs12545320  | 8 | 89903532 C    | 4 | 20 T | 0.0003114 |
| rs76693810  | 8 | 89904752 C    | 4 | 20 T | 0.0003114 |
| rs75997451  | 8 | 89906558 G    | 4 | 19 A | 0.0005969 |
| rs77576803  | 8 | 89907144 G    | 4 | 19 C | 0.0005969 |
| rs78255467  | 8 | 89907313 G    | 4 | 19 A | 0.0005969 |
| rs79092366  | 8 | 89907391 C    | 4 | 19 T | 0.0005969 |
| rs78252561  | 8 | 89909036 G    | 4 | 19 C | 0.0005969 |
| rs76957720  | 8 | 89910229 C    | 4 | 19 T | 0.0005969 |
| rs201562877 | 8 | 89912359 GT   | 4 | 19 G | 0.0005969 |
| rs141898345 | 8 | 89913369 C    | 4 | 19 T | 0.0005969 |
| rs147503841 | 8 | 89913709 G    | 4 | 19 A | 0.0005969 |
| rs77605958  | 8 | 89916995 A    | 4 | 19 G | 0.0005969 |

|             |   |          |    |   |    |                        |           |
|-------------|---|----------|----|---|----|------------------------|-----------|
| rs77438689  | 8 | 89919805 | T  | 4 | 19 | A                      | 0.0005969 |
| rs16888626  | 8 | 89924325 | A  | 4 | 19 | T                      | 0.0005969 |
| rs75422852  | 8 | 89924438 | A  | 4 | 19 | G                      | 0.0005969 |
| rs10504868  | 8 | 89924814 | G  | 4 | 19 | A                      | 0.0005969 |
| rs147372656 | 8 | 89925045 | A  | 4 | 19 | ATTGT                  | 0.0005969 |
| rs7003639   | 8 | 89930086 | C  | 4 | 19 | T                      | 0.0005969 |
| rs6986236   | 8 | 89931641 | T  | 4 | 19 | C                      | 0.0005969 |
| rs7835231   | 8 | 89933717 | A  | 4 | 19 | G                      | 0.0005969 |
| rs56032547  | 8 | 89938031 | C  | 3 | 19 | T                      | 0.0001662 |
| rs28535979  | 8 | 89940602 | G  | 3 | 19 | A                      | 0.0001662 |
| rs12550183  | 8 | 89941029 | G  | 3 | 19 | A                      | 0.0001662 |
| rs12550778  | 8 | 89941428 | C  | 3 | 19 | T                      | 0.0001662 |
| rs7386824   | 8 | 89943382 | T  | 3 | 19 | G                      | 0.0001662 |
| rs7832907   | 8 | 89945449 | C  | 3 | 19 | G                      | 0.0001662 |
| rs6981959   | 8 | 89948142 | T  | 3 | 19 | C                      | 0.0001662 |
| rs28580081  | 8 | 89949868 | A  | 3 | 19 | G                      | 0.0001662 |
| rs7845473   | 8 | 89950655 | A  | 3 | 19 | T                      | 0.0001662 |
| rs6980555   | 8 | 89951727 | T  | 3 | 19 | A                      | 0.0001662 |
| rs6989186   | 8 | 89958433 | C  | 3 | 19 | A                      | 0.0001662 |
| rs28571731  | 8 | 89959481 | A  | 3 | 19 | T                      | 0.0001662 |
| rs7005222   | 8 | 89961346 | G  | 3 | 19 | A                      | 0.0001662 |
| rs199520323 | 8 | 89963649 | C  | 3 | 19 | CT                     | 0.0001662 |
| rs7812413   | 8 | 89968423 | C  | 3 | 19 | T                      | 0.0001662 |
| rs1994443   | 8 | 89969412 | G  | 5 | 23 | C                      | 0.0001426 |
| rs10095833  | 8 | 89971816 | G  | 5 | 23 | C                      | 0.0001426 |
| rs35561412  | 8 | 89975371 | A  | 3 | 19 | ATTATTTTAATTCCAT       | 0.0001662 |
| rs10109745  | 8 | 89976774 | G  | 3 | 19 | A                      | 0.0001662 |
| rs10102990  | 8 | 89978522 | T  | 3 | 19 | C                      | 0.0001662 |
| rs11267246  | 8 | 89983069 | T  | 3 | 19 | TTCTGTGACCTTGGATAGGTTA | 0.0001662 |
| rs79230440  | 8 | 89984014 | A  | 3 | 19 | G                      | 0.0001662 |
| rs12056804  | 8 | 89984466 | A  | 8 | 26 | G                      | 0.0004835 |
| rs2200642   | 8 | 89986840 | C  | 3 | 19 | T                      | 0.0001662 |
| rs7842838   | 8 | 89987721 | A  | 8 | 26 | C                      | 0.0004835 |
| rs10283336  | 8 | 89990848 | T  | 3 | 19 | C                      | 0.0001662 |
| rs1843977   | 8 | 89993025 | T  | 8 | 26 | C                      | 0.0004835 |
| rs10429371  | 8 | 89993488 | C  | 8 | 26 | T                      | 0.0004835 |
| rs142671358 | 8 | 89993687 | AT | 3 | 19 | A                      | 0.0001662 |
| rs1872892   | 8 | 89996790 | C  | 4 | 20 | T                      | 0.0003114 |
| rs4961107   | 8 | 89997737 | C  | 2 | 15 | T                      | 0.0006243 |
| rs1487794   | 8 | 89998814 | G  | 2 | 15 | A                      | 0.0006243 |

|             |   |                  |    |          |            |
|-------------|---|------------------|----|----------|------------|
| rs11294484  | 8 | 90000670 CA      | 4  | 19 C     | 0.0006572  |
| rs75975346  | 8 | 90001592 T       | 2  | 15 TAAAC | 0.0006243  |
| rs1565148   | 8 | 90002125 C       | 2  | 15 T     | 0.0006243  |
| rs62534091  | 8 | 90002857 T       | 2  | 15 C     | 0.0006243  |
| rs10504870  | 8 | 90003188 A       | 2  | 15 G     | 0.0006243  |
| rs17677468  | 8 | 90009992 G       | 2  | 15 A     | 0.0006243  |
| rs56336164  | 8 | 90015581 C       | 2  | 15 A     | 0.0006243  |
| rs62532181  | 8 | 90021378 T       | 2  | 15 C     | 0.0006243  |
| rs199810687 | 8 | 93020618 T       | 18 | 42 A     | 0.0001244  |
| 8:93020620  | 8 | 93020620 T       | 18 | 42 A     | 0.00007147 |
| rs185504961 | 8 | 94163993 C       | 31 | 9 A      | 0.0001497  |
| rs55885345  | 8 | 94165158 G       | 29 | 9 C      | 0.0004831  |
| rs11994496  | 8 | 94167808 A       | 29 | 9 T      | 0.0004831  |
| rs11997850  | 8 | 94168257 A       | 29 | 9 G      | 0.0004831  |
| rs11994583  | 8 | 94168269 G       | 29 | 9 A      | 0.0004831  |
| rs58956972  | 8 | 94168702 A       | 29 | 9 G      | 0.0004831  |
| rs59244644  | 8 | 94171932 G       | 29 | 9 C      | 0.0004831  |
| rs11988363  | 8 | 94178447 A       | 29 | 9 G      | 0.0004831  |
| rs9649976   | 8 | 94181602 G       | 28 | 9 A      | 0.0008484  |
| rs1348913   | 8 | 94184259 A       | 28 | 9 G      | 0.0008484  |
| rs16915696  | 8 | 94185302 T       | 28 | 9 C      | 0.0008484  |
| rs368828525 | 8 | 94186120 A       | 28 | 9 ACTCT  | 0.0008484  |
| rs16915699  | 8 | 94186262 A       | 28 | 9 T      | 0.0008484  |
| rs56105257  | 8 | 94189529 T       | 28 | 9 C      | 0.0008484  |
| rs59851916  | 8 | 94190441 C       | 30 | 8 G      | 0.0001064  |
| rs16915713  | 8 | 94190752 A       | 30 | 9 G      | 0.0002709  |
| rs72662246  | 8 | 94191231 A       | 30 | 9 T      | 0.0002709  |
| rs2197673   | 8 | 94192043 A       | 30 | 9 T      | 0.0002709  |
| rs1374631   | 8 | 94192133 C       | 30 | 9 A      | 0.0002709  |
| rs1374630   | 8 | 94192137 A       | 30 | 9 G      | 0.0002709  |
| rs1374629   | 8 | 94192318 T       | 30 | 9 C      | 0.0002709  |
| rs148531481 | 8 | 94192592 C       | 30 | 9 CT     | 0.0002709  |
| rs16915718  | 8 | 94192856 C       | 30 | 9 T      | 0.0002709  |
| rs66461754  | 8 | 94193026 A       | 30 | 9 G      | 0.0002709  |
| rs10504927  | 8 | 94193643 T       | 30 | 9 A      | 0.0002709  |
| rs61578878  | 8 | 94196408 G       | 30 | 9 T      | 0.0002709  |
| rs148082725 | 8 | 94983641 GGGGAGA | 41 | 18 G     | 0.0007388  |
| rs3134244   | 8 | 96594225 T       | 43 | 19 A     | 0.0005165  |
| rs4346965   | 8 | 101422896 G      | 4  | 21 A     | 0.0001601  |
| rs117769774 | 8 | 109102918 A      | 0  | 10 G     | 0.0005917  |

|             |               |    |      |           |
|-------------|---------------|----|------|-----------|
| rs77767830  | 8 109268396 T | 0  | 10 A | 0.0005917 |
| rs28460811  | 8 115635497 C | 32 | 11 T | 0.0007744 |
| rs1156022   | 8 115641238 C | 32 | 11 T | 0.0007744 |
| rs7846669   | 8 115641841 C | 32 | 11 T | 0.0007744 |
| rs10087123  | 8 115643325 T | 32 | 11 C | 0.0007744 |
| rs201102203 | 8 115644084 A | 14 | 1 C  | 0.0006677 |
| rs755175    | 8 120587966 G | 56 | 30 C | 0.0003574 |
| rs2875905   | 8 120591785 C | 57 | 30 A | 0.0002015 |
| rs4871360   | 8 120593737 T | 56 | 30 C | 0.0003574 |
| rs74697424  | 8 122745546 C | 31 | 9 A  | 0.0001497 |
| rs73324837  | 8 122747762 G | 31 | 9 A  | 0.0001497 |
| rs16895935  | 8 122752496 A | 31 | 9 G  | 0.0001497 |
| rs4871211   | 8 122755282 A | 1  | 13 C | 0.0005059 |
| rs57880755  | 8 122756405 G | 31 | 9 C  | 0.0001497 |
| rs61527129  | 8 122757085 A | 31 | 9 C  | 0.0001497 |
| rs12541500  | 8 122760759 A | 1  | 13 G | 0.0005059 |
| rs56339311  | 8 122767658 A | 31 | 10 G | 0.0003611 |
| rs60059140  | 8 122781270 G | 31 | 9 GA | 0.0001497 |
| rs73324878  | 8 122791268 T | 36 | 12 C | 0.0001705 |
| rs74512397  | 8 122792014 C | 1  | 13 T | 0.0005059 |
| rs80348309  | 8 122799461 A | 36 | 12 T | 0.0001705 |
| rs77077293  | 8 122801499 T | 1  | 13 C | 0.0005059 |
| rs279657    | 8 122804568 T | 44 | 20 C | 0.0005739 |
| rs16896103  | 8 122806329 C | 37 | 14 T | 0.0004475 |
| rs12681688  | 8 122845858 T | 31 | 11 C | 0.0008085 |
| rs111416674 | 8 122846406 T | 31 | 11 C | 0.0008085 |
| rs4397409   | 8 123481414 T | 48 | 24 C | 0.0007984 |
| 8:124856940 | 8 124856940 T | 23 | 5 G  | 0.0003619 |
| 8:130622402 | 8 130622402 G | 37 | 13 A | 0.0001083 |
| rs7840584   | 8 130622403 T | 36 | 14 C | 0.0007756 |
| 8:130622405 | 8 130622405 T | 30 | 9 C  | 0.0002709 |
| rs6578129   | 8 141656890 G | 22 | 45 A | 0.0002011 |
| rs938724    | 8 141657133 G | 22 | 45 A | 0.0002011 |
| rs6997840   | 8 141658361 T | 21 | 45 C | 0.0001015 |
| rs11166988  | 8 141661663 A | 23 | 45 G | 0.0003849 |
| rs2288998   | 8 142225990 A | 36 | 13 G | 0.0003739 |
| 9:30098     | 9 30098 T     | 11 | 0 C  | 0.0007274 |
| rs7042540   | 9 343859 C    | 19 | 40 T | 0.0004646 |
| rs10964337  | 9 2000062 G   | 10 | 28 A | 0.000853  |
| rs59601268  | 9 2931638 AG  | 12 | 31 A | 0.0007705 |

|             |   |              |    |      |           |
|-------------|---|--------------|----|------|-----------|
| rs12348338  | 9 | 2932407 A    | 12 | 31 C | 0.0007705 |
| rs10813032  | 9 | 2933171 T    | 5  | 20 C | 0.0009659 |
| rs72685681  | 9 | 3998736 G    | 1  | 13 T | 0.0005059 |
| rs7024586   | 9 | 5579213 A    | 8  | 28 G | 0.000142  |
| rs10738365  | 9 | 14512767 T   | 54 | 29 A | 0.0006016 |
| rs10756563  | 9 | 14514644 G   | 53 | 28 A | 0.00058   |
| rs142454823 | 9 | 14656001 GA  | 18 | 3 G  | 0.0008121 |
| rs10810202  | 9 | 14656231 C   | 18 | 3 G  | 0.0008121 |
| rs10810203  | 9 | 14658112 C   | 18 | 3 A  | 0.0008121 |
| rs7867448   | 9 | 20199527 A   | 20 | 3 C  | 0.0002211 |
| rs12237376  | 9 | 20205568 C   | 20 | 4 G  | 0.0007606 |
| rs7851999   | 9 | 20218125 G   | 21 | 4 A  | 0.0004069 |
| rs10465048  | 9 | 20218695 A   | 21 | 4 G  | 0.0004069 |
| rs2034875   | 9 | 20219315 A   | 21 | 4 G  | 0.0004069 |
| rs2004294   | 9 | 20235881 A   | 20 | 4 C  | 0.0007606 |
| rs71506787  | 9 | 23946141 T   | 10 | 29 G | 0.0004811 |
| rs7850545   | 9 | 26671842 C   | 15 | 35 G | 0.0004795 |
| rs2150989   | 9 | 28034155 G   | 31 | 11 C | 0.0008085 |
| rs1343457   | 9 | 28035209 C   | 31 | 11 T | 0.0008085 |
| 9:29708965  | 9 | 29708965 G   | 0  | 10 A | 0.0006636 |
| rs117400746 | 9 | 32908910 T   | 5  | 20 C | 0.0009429 |
| rs1530308   | 9 | 32911524 C   | 8  | 27 T | 0.0002641 |
| rs28572375  | 9 | 43702852 A   | 4  | 20 C | 0.000303  |
| 9:66460369  | 9 | 66460369 G   | 0  | 10 T | 0.0005917 |
| rs199578430 | 9 | 67328446 A   | 14 | 1 G  | 0.0006347 |
| 9:69045346  | 9 | 69045346 T   | 3  | 17 C | 0.0006426 |
| 9:74888797  | 9 | 74888797 C   | 0  | 10 G | 0.0005917 |
| rs7041453   | 9 | 75715270 T   | 9  | 29 C | 0.0001986 |
| rs11143515  | 9 | 75790576 G   | 29 | 8 C  | 0.0001956 |
| rs4571790   | 9 | 75833403 A   | 14 | 1 C  | 0.0006347 |
| rs35750820  | 9 | 75835437 CTT | 17 | 2 C  | 0.0004014 |
| rs4581122   | 9 | 75836057 A   | 17 | 2 C  | 0.0004014 |
| rs9657735   | 9 | 75838758 T   | 17 | 2 C  | 0.0004014 |
| rs9657736   | 9 | 75840034 G   | 17 | 2 A  | 0.0004014 |
| rs28796899  | 9 | 75841710 T   | 19 | 3 A  | 0.0004632 |
| rs28833833  | 9 | 75841713 A   | 17 | 2 T  | 0.0004307 |
| rs4366143   | 9 | 75843433 T   | 17 | 2 C  | 0.0004014 |
| rs6560325   | 9 | 75844545 T   | 17 | 2 C  | 0.0004014 |
| rs7863612   | 9 | 75845098 T   | 17 | 2 G  | 0.0004014 |
| rs4495499   | 9 | 75845497 T   | 17 | 2 C  | 0.0004014 |

|            |   |          |   |    |    |       |            |
|------------|---|----------|---|----|----|-------|------------|
| rs4745226  | 9 | 75846009 | A | 17 | 2  | T     | 0.0004014  |
| rs4510925  | 9 | 75846595 | G | 17 | 2  | T     | 0.0004014  |
| rs5898293  | 9 | 75847204 | G | 17 | 2  | GA    | 0.0004014  |
| rs4400456  | 9 | 75857034 | T | 19 | 3  | C     | 0.0004265  |
| rs67538661 | 9 | 75858583 | T | 19 | 3  | TA    | 0.0004265  |
| rs4276752  | 9 | 75860197 | C | 19 | 3  | T     | 0.0004265  |
| rs4282636  | 9 | 75906317 | A | 19 | 1  | C     | 0.00001683 |
| rs4474087  | 9 | 75906822 | A | 19 | 1  | G     | 0.00001683 |
| rs10869248 | 9 | 75907820 | A | 16 | 1  | C     | 0.0001529  |
| rs11143561 | 9 | 75926372 | T | 19 | 1  | C     | 0.00001683 |
| rs1414159  | 9 | 75932545 | C | 19 | 1  | A     | 0.00001683 |
| rs35789695 | 9 | 75943778 | C | 19 | 1  | CTCTT | 0.00001683 |
| rs1335387  | 9 | 75974289 | G | 19 | 1  | A     | 0.00001683 |
| rs6560339  | 9 | 76001473 | A | 19 | 1  | G     | 0.00001683 |
| rs2013971  | 9 | 76010849 | C | 19 | 1  | A     | 0.00001683 |
| rs1414161  | 9 | 76025984 | G | 19 | 1  | A     | 0.00001683 |
| rs1034264  | 9 | 76027946 | T | 19 | 1  | C     | 0.00001683 |
| rs280564   | 9 | 76052211 | G | 19 | 1  | T     | 0.00001683 |
| rs280573   | 9 | 76074106 | C | 22 | 5  | T     | 0.0006676  |
| rs2484348  | 9 | 76078030 | T | 16 | 1  | G     | 0.0001529  |
| rs375914   | 9 | 76085223 | G | 16 | 1  | T     | 0.0001529  |
| rs278742   | 9 | 76094975 | A | 16 | 1  | T     | 0.0001529  |
| rs278738   | 9 | 76098252 | A | 16 | 1  | C     | 0.0001529  |
| rs278733   | 9 | 76110042 | T | 16 | 1  | C     | 0.0001529  |
| rs383182   | 9 | 76115818 | C | 16 | 1  | T     | 0.0001529  |
| rs278763   | 9 | 76127267 | A | 16 | 1  | G     | 0.0001529  |
| rs166767   | 9 | 76137194 | C | 16 | 1  | T     | 0.0001529  |
| rs278753   | 9 | 76141288 | G | 16 | 1  | A     | 0.0001529  |
| rs2492826  | 9 | 76150936 | A | 16 | 1  | T     | 0.0001529  |
| rs278711   | 9 | 76154116 | A | 16 | 1  | G     | 0.0001529  |
| rs278731   | 9 | 76162393 | T | 16 | 1  | C     | 0.0001529  |
| rs382417   | 9 | 76164453 | G | 16 | 1  | A     | 0.0001529  |
| rs451914   | 9 | 76164728 | G | 16 | 1  | A     | 0.0001529  |
| rs10869268 | 9 | 76167213 | C | 20 | 4  | T     | 0.0007606  |
| rs275530   | 9 | 76174599 | G | 16 | 1  | A     | 0.0001529  |
| rs157119   | 9 | 76182983 | G | 16 | 1  | C     | 0.0001529  |
| rs4744778  | 9 | 78553139 | C | 32 | 53 | T     | 0.0009656  |
| rs7044428  | 9 | 78555026 | A | 30 | 51 | G     | 0.0009286  |
| rs7048126  | 9 | 78555287 | T | 30 | 51 | G     | 0.0009286  |
| rs11144691 | 9 | 78556111 | G | 33 | 55 | A     | 0.0005652  |

|             |   |                |    |      |            |
|-------------|---|----------------|----|------|------------|
| rs116957104 | 9 | 78558948 G     | 24 | 6 A  | 0.0005592  |
| rs11144696  | 9 | 78567807 G     | 42 | 18 A | 0.0004599  |
| rs10869673  | 9 | 78580233 T     | 30 | 52 C | 0.00054    |
| rs11432519  | 9 | 78587997 TA    | 50 | 24 T | 0.0002688  |
| rs142618397 | 9 | 78658085 AC    | 28 | 9 A  | 0.0008484  |
| rs1258095   | 9 | 78670393 A     | 28 | 9 G  | 0.0008484  |
| rs10869765  | 9 | 78971232 G     | 32 | 55 A | 0.0003175  |
| rs2377637   | 9 | 78975569 A     | 27 | 5 G  | 0.00002724 |
| rs11144853  | 9 | 78976290 C     | 27 | 5 A  | 0.00002724 |
| rs11144855  | 9 | 78977568 A     | 27 | 5 G  | 0.00002724 |
| rs7858410   | 9 | 78979879 C     | 32 | 55 T | 0.0003175  |
| rs78481373  | 9 | 78980882 GCA   | 26 | 4 G  | 0.00001463 |
| rs34662513  | 9 | 78980960 CTG   | 43 | 17 C | 0.0000279  |
| rs7862262   | 9 | 78981413 G     | 31 | 55 C | 0.0001739  |
| rs11454957  | 9 | 78981576 TA    | 26 | 5 T  | 0.00005306 |
| rs143198459 | 9 | 79101832 AAAAC | 23 | 44 A | 0.0006657  |
| rs590666    | 9 | 79103366 T     | 29 | 50 C | 0.0009027  |
| rs503222    | 9 | 79104807 T     | 26 | 49 C | 0.0002646  |
| rs608697    | 9 | 79105108 A     | 27 | 49 G | 0.0004874  |
| rs620295    | 9 | 79105317 T     | 27 | 49 C | 0.0004874  |
| rs2476940   | 9 | 79105850 T     | 27 | 49 C | 0.0004874  |
| rs553927    | 9 | 79106713 A     | 54 | 29 G | 0.0006016  |
| rs553806    | 9 | 79106751 T     | 54 | 29 C | 0.0006016  |
| rs2476941   | 9 | 79107595 T     | 28 | 49 C | 0.0008723  |
| rs1085341   | 9 | 79107749 T     | 28 | 49 C | 0.0008723  |
| rs664013    | 9 | 79108199 G     | 28 | 49 T | 0.0008723  |
| rs496253    | 9 | 79108382 A     | 54 | 29 G | 0.0006016  |
| rs619429    | 9 | 79111675 A     | 28 | 49 C | 0.0008723  |
| rs631887    | 9 | 79112200 T     | 54 | 29 C | 0.0006016  |
| rs634064    | 9 | 79112688 A     | 27 | 49 C | 0.0004874  |
| rs570212    | 9 | 79112701 T     | 55 | 29 C | 0.000347   |
| rs566470    | 9 | 79113087 G     | 28 | 49 A | 0.0008723  |
| rs785927    | 9 | 79113497 A     | 28 | 49 T | 0.0008723  |
| rs688268    | 9 | 79139590 T     | 14 | 33 G | 0.0007122  |
| rs639898    | 9 | 79150262 G     | 22 | 43 A | 0.0006167  |
| rs652061    | 9 | 79150662 A     | 22 | 43 G | 0.0006167  |
| rs653026    | 9 | 79150903 A     | 22 | 43 G | 0.0006167  |
| rs478699    | 9 | 79258395 T     | 29 | 50 C | 0.0009027  |
| rs478792    | 9 | 79258419 G     | 29 | 51 C | 0.0005253  |
| rs511040    | 9 | 79259592 C     | 31 | 53 T | 0.0005517  |

|             |   |               |    |                  |           |
|-------------|---|---------------|----|------------------|-----------|
| rs370347624 | 9 | 79264272 TATC | 32 | 53 T             | 0.0009656 |
| rs488165    | 9 | 79312409 G    | 26 | 50 A             | 0.0001475 |
| rs489069    | 9 | 79312491 C    | 26 | 50 A             | 0.0001475 |
| rs684639    | 9 | 79312579 A    | 26 | 50 T             | 0.0001475 |
| rs685011    | 9 | 79312627 C    | 26 | 50 G             | 0.0001475 |
| rs2487263   | 9 | 79313293 A    | 26 | 50 G             | 0.0001475 |
| rs519983    | 9 | 79313525 A    | 26 | 50 G             | 0.0001475 |
| rs551262    | 9 | 79314660 T    | 26 | 50 A             | 0.0001475 |
| rs620985    | 9 | 79318921 A    | 26 | 50 G             | 0.0001475 |
| rs683866    | 9 | 79322068 G    | 26 | 50 T             | 0.0001475 |
| rs2307907   | 9 | 79324135 A    | 26 | 50 ATGACTGTTGCAG | 0.0001475 |
| rs530978    | 9 | 79324179 G    | 26 | 50 A             | 0.0001475 |
| rs557352    | 9 | 79324741 T    | 26 | 50 C             | 0.0001475 |
| rs600859    | 9 | 79325558 G    | 26 | 50 C             | 0.0001475 |
| rs626837    | 9 | 79326770 A    | 26 | 50 G             | 0.0001475 |
| rs630423    | 9 | 79327585 G    | 26 | 50 A             | 0.0001475 |
| rs641088    | 9 | 79327670 A    | 26 | 50 G             | 0.0001475 |
| rs537903    | 9 | 79327732 T    | 26 | 50 C             | 0.0001475 |
| rs571960    | 9 | 79329205 G    | 26 | 50 T             | 0.0001475 |
| rs658548    | 9 | 79329257 T    | 26 | 50 C             | 0.0001475 |
| rs659003    | 9 | 79329337 G    | 26 | 50 T             | 0.0001475 |
| rs35230302  | 9 | 79329462 CA   | 26 | 50 C             | 0.0001475 |
| rs491798    | 9 | 79330169 T    | 26 | 50 A             | 0.0001475 |
| rs1854439   | 9 | 79335763 T    | 51 | 27 C             | 0.0004482 |
| rs10781372  | 9 | 79339715 C    | 51 | 26 T             | 0.0005284 |
| rs4744804   | 9 | 79340064 G    | 51 | 27 A             | 0.0009437 |
| rs10746999  | 9 | 79342925 T    | 51 | 26 C             | 0.0005284 |
| rs10735649  | 9 | 79343326 C    | 51 | 27 T             | 0.0009437 |
| rs7047291   | 9 | 80085964 G    | 31 | 52 C             | 0.0009496 |
| rs2120397   | 9 | 80101199 G    | 22 | 43 A             | 0.0006167 |
| rs12379817  | 9 | 87624702 A    | 8  | 26 G             | 0.0004835 |
| rs12376615  | 9 | 87628880 G    | 8  | 26 A             | 0.0004835 |
| rs76736475  | 9 | 87631970 A    | 8  | 26 T             | 0.0004835 |
| rs12378021  | 9 | 87635540 T    | 8  | 27 C             | 0.0002641 |
| rs113758704 | 9 | 87643898 C    | 6  | 23 CTCTTCTTTCTT  | 0.000429  |
| rs1073049   | 9 | 87647100 C    | 6  | 23 T             | 0.000429  |
| rs972604    | 9 | 87648729 T    | 6  | 23 C             | 0.000429  |
| rs11791017  | 9 | 87654600 G    | 6  | 23 C             | 0.000429  |
| rs56132626  | 9 | 87656845 C    | 6  | 23 A             | 0.000429  |
| rs9886759   | 9 | 87657757 A    | 6  | 23 G             | 0.000429  |



|            |   |          |    |   |    |       |           |
|------------|---|----------|----|---|----|-------|-----------|
| rs17334250 | 9 | 87657989 | C  | 6 | 23 | A     | 0.000429  |
| rs11140837 | 9 | 87659842 | C  | 6 | 23 | G     | 0.000429  |
| rs55803300 | 9 | 87659954 | T  | 6 | 23 | C     | 0.000429  |
| rs1038763  | 9 | 87662368 | C  | 6 | 23 | A     | 0.000429  |
| rs55737088 | 9 | 87662734 | AT | 6 | 23 | A     | 0.000429  |
| rs11140840 | 9 | 87663761 | T  | 6 | 23 | G     | 0.000429  |
| rs17419081 | 9 | 87665585 | A  | 6 | 23 | G     | 0.000429  |
| rs17334480 | 9 | 87665823 | T  | 6 | 23 | C     | 0.000429  |
| rs7047067  | 9 | 87666242 | T  | 6 | 23 | C     | 0.000429  |
| rs7019906  | 9 | 87666637 | T  | 6 | 23 | C     | 0.000429  |
| rs12338789 | 9 | 87668792 | C  | 6 | 23 | A     | 0.000429  |
| rs57018861 | 9 | 87669383 | T  | 6 | 23 | C     | 0.000429  |
| rs60316689 | 9 | 87669393 | G  | 6 | 23 | A     | 0.000429  |
| rs55936438 | 9 | 87670756 | G  | 6 | 23 | A     | 0.000429  |
| rs1490402  | 9 | 87673253 | C  | 6 | 23 | T     | 0.000429  |
| rs58921047 | 9 | 87673578 | TA | 4 | 18 | T     | 0.0009654 |
| rs7027411  | 9 | 87673780 | G  | 6 | 23 | A     | 0.000429  |
| rs7032009  | 9 | 87674914 | T  | 6 | 23 | A     | 0.000429  |
| rs12350350 | 9 | 87676170 | G  | 6 | 23 | C     | 0.000429  |
| rs58901408 | 9 | 87676180 | G  | 6 | 23 | A     | 0.000429  |
| rs55801664 | 9 | 87676560 | C  | 6 | 23 | T     | 0.000429  |
| rs56860108 | 9 | 87677422 | G  | 6 | 23 | GTTCT | 0.000429  |
| 9:87677427 | 9 | 87677427 | G  | 6 | 23 | T     | 0.000429  |
| rs1490401  | 9 | 87677645 | C  | 6 | 23 | T     | 0.000429  |
| rs72739980 | 9 | 87678321 | C  | 6 | 23 | G     | 0.000429  |
| rs56128419 | 9 | 87679040 | A  | 6 | 23 | G     | 0.000429  |
| rs59715785 | 9 | 87679240 | A  | 6 | 23 | G     | 0.000429  |
| rs72739981 | 9 | 87679596 | A  | 6 | 23 | G     | 0.000429  |
| rs73649505 | 9 | 87679744 | A  | 6 | 23 | C     | 0.000429  |
| rs7862675  | 9 | 87681108 | G  | 6 | 23 | A     | 0.000429  |
| rs56320974 | 9 | 87683008 | C  | 6 | 23 | G     | 0.000429  |
| rs56332820 | 9 | 87685187 | C  | 6 | 23 | G     | 0.000429  |
| rs1982841  | 9 | 87686259 | C  | 6 | 23 | T     | 0.000429  |
| rs4373600  | 9 | 87686621 | C  | 6 | 22 | T     | 0.0007921 |
| rs4642728  | 9 | 87686692 | C  | 5 | 23 | T     | 0.0001378 |
| rs4475585  | 9 | 87686716 | A  | 5 | 23 | C     | 0.0001307 |
| rs55860493 | 9 | 87687029 | A  | 6 | 23 | G     | 0.000429  |
| rs9695661  | 9 | 87688329 | T  | 6 | 23 | C     | 0.000429  |
| rs7024408  | 9 | 87688748 | C  | 6 | 23 | T     | 0.000429  |
| 9:87690060 | 9 | 87690060 | C  | 6 | 23 | A     | 0.000429  |

|             |   |             |    |          |            |
|-------------|---|-------------|----|----------|------------|
| rs140872421 | 9 | 87691466 C  | 6  | 23 T     | 0.000429   |
| rs369543529 | 9 | 87691952 A  | 6  | 23 G     | 0.000429   |
| rs147238133 | 9 | 87692263 A  | 6  | 23 G     | 0.000429   |
| rs56081839  | 9 | 87692517 G  | 6  | 23 A     | 0.000429   |
| rs139986476 | 9 | 87693567 A  | 6  | 23 AAAG  | 0.000429   |
| rs7038454   | 9 | 87694454 G  | 6  | 23 A     | 0.000429   |
| 9:88283892  | 9 | 88283892 A  | 2  | 15 G     | 0.0006243  |
| rs12343261  | 9 | 89205672 T  | 41 | 16 C     | 0.000199   |
| rs10780772  | 9 | 89206095 A  | 41 | 15 T     | 0.00009342 |
| rs13298180  | 9 | 89213222 T  | 43 | 20 C     | 0.0009741  |
| rs11315810  | 9 | 89213749 C  | 44 | 19 CT    | 0.0002974  |
| rs1010176   | 9 | 89217172 G  | 46 | 22 A     | 0.0006885  |
| rs34351553  | 9 | 89219656 G  | 46 | 22 A     | 0.0006885  |
| rs868823    | 9 | 89219781 G  | 46 | 22 A     | 0.0006885  |
| rs200577254 | 9 | 89223235 G  | 46 | 22 A     | 0.0006885  |
| rs7019542   | 9 | 89225229 T  | 46 | 22 C     | 0.0006885  |
| rs12338699  | 9 | 89227192 T  | 48 | 22 G     | 0.0002295  |
| rs12338628  | 9 | 89227242 T  | 50 | 26 C     | 0.0008986  |
| rs11788864  | 9 | 93445598 T  | 3  | 18 C     | 0.0003291  |
| rs35310535  | 9 | 93521114 A  | 3  | 17 G     | 0.0006426  |
| rs11794611  | 9 | 93534941 G  | 3  | 19 A     | 0.0001662  |
| rs10993694  | 9 | 93559029 C  | 34 | 12 G     | 0.0003362  |
| rs10821506  | 9 | 93560316 T  | 34 | 12 C     | 0.0003362  |
| rs10821507  | 9 | 93561614 T  | 34 | 12 G     | 0.0003362  |
| rs34221447  | 9 | 93563884 T  | 34 | 12 C     | 0.0003362  |
| rs9409462   | 9 | 94546619 T  | 10 | 28 C     | 0.000853   |
| rs62565672  | 9 | 94629940 C  | 0  | 11 G     | 0.0002355  |
| rs2698999   | 9 | 102735865 A | 58 | 30 C     | 0.0001111  |
| rs2791335   | 9 | 102736844 A | 57 | 30 G     | 0.0002015  |
| rs2791336   | 9 | 102739446 C | 58 | 30 G     | 0.0001111  |
| rs2791337   | 9 | 102741443 C | 56 | 29 T     | 0.000146   |
| rs7862460   | 9 | 102748888 G | 58 | 30 C     | 0.0001111  |
| rs12685650  | 9 | 102749175 G | 58 | 30 C     | 0.0001111  |
| rs10819714  | 9 | 102751188 T | 58 | 30 C     | 0.0001111  |
| rs7874449   | 9 | 102752182 A | 58 | 30 G     | 0.0001111  |
| rs10988934  | 9 | 102752686 T | 58 | 30 C     | 0.0001111  |
| rs6478993   | 9 | 102754426 A | 23 | 44 G     | 0.0006657  |
| rs58414815  | 9 | 102756707 T | 57 | 30 TCTCA | 0.0002015  |
| rs10760711  | 9 | 102766119 C | 57 | 30 G     | 0.0002015  |
| rs10819715  | 9 | 102769559 C | 58 | 30 G     | 0.0001111  |

|             |                |    |                          |            |
|-------------|----------------|----|--------------------------|------------|
| rs2209082   | 9 102770884 C  | 58 | 30 T                     | 0.0001111  |
| rs145295727 | 9 102772214 A  | 57 | 30 AGGAAAATTCTTTTTCTAAAC | 0.0002015  |
| rs10988945  | 9 102776091 T  | 58 | 30 A                     | 0.0001111  |
| rs7870585   | 9 102779098 A  | 58 | 30 G                     | 0.0001111  |
| rs4742779   | 9 102781837 C  | 58 | 29 A                     | 0.00005841 |
| rs1578646   | 9 102798031 G  | 58 | 30 A                     | 0.0001111  |
| rs2093696   | 9 102799758 A  | 58 | 30 G                     | 0.0001111  |
| rs35493819  | 9 102803899 A  | 58 | 30 G                     | 0.0001111  |
| rs7858606   | 9 102805864 T  | 57 | 30 C                     | 0.0002015  |
| rs4743379   | 9 102807181 A  | 58 | 30 C                     | 0.0001111  |
| rs4743380   | 9 102807279 G  | 58 | 30 A                     | 0.0001111  |
| rs3052013   | 9 102812595 C  | 58 | 30 CAT                   | 0.0001111  |
| rs41346545  | 9 102816751 A  | 58 | 30 C                     | 0.0001111  |
| rs4743381   | 9 102817835 C  | 58 | 30 T                     | 0.0001111  |
| rs4743382   | 9 102817841 T  | 58 | 30 C                     | 0.0001111  |
| rs942163    | 9 102820002 C  | 58 | 30 T                     | 0.0001111  |
| rs7042194   | 9 102821369 A  | 58 | 30 G                     | 0.0001111  |
| rs7027536   | 9 102829705 G  | 58 | 30 C                     | 0.0001111  |
| rs10988961  | 9 102829806 A  | 58 | 30 G                     | 0.0001111  |
| rs2900234   | 9 102830208 T  | 57 | 29 C                     | 0.0001082  |
| rs146685377 | 9 102831618 A  | 56 | 29 AAAG                  | 0.0001959  |
| rs7036518   | 9 102839699 C  | 58 | 30 T                     | 0.0001111  |
| rs7047092   | 9 102839709 A  | 58 | 30 G                     | 0.0001111  |
| rs7018981   | 9 102842941 C  | 58 | 30 T                     | 0.0001111  |
| rs1342147   | 9 102844842 A  | 58 | 30 C                     | 0.0001111  |
| rs1529191   | 9 102845908 A  | 58 | 30 G                     | 0.0001111  |
| rs4517187   | 9 102850723 A  | 58 | 30 C                     | 0.0001111  |
| rs10988968  | 9 102852401 A  | 57 | 30 T                     | 0.0002015  |
| rs10988969  | 9 102852444 G  | 58 | 30 A                     | 0.0001111  |
| rs1361668   | 9 102856306 C  | 57 | 30 G                     | 0.0002015  |
| rs72548315  | 9 102857088 TA | 56 | 30 T                     | 0.0001878  |
| rs2181579   | 9 102863821 A  | 58 | 30 C                     | 0.0001111  |
| rs12552646  | 9 102868475 T  | 58 | 29 C                     | 0.00005841 |
| rs10988973  | 9 102869846 A  | 58 | 30 G                     | 0.0001111  |
| rs1539297   | 9 102871586 G  | 58 | 30 A                     | 0.0001111  |
| rs10988974  | 9 102871835 T  | 58 | 30 C                     | 0.0001111  |
| rs4743386   | 9 102872241 A  | 58 | 30 G                     | 0.0001111  |
| rs34439340  | 9 102875543 G  | 57 | 30 GTTA                  | 0.0002015  |
| rs9408993   | 9 102877633 G  | 57 | 30 A                     | 0.0002015  |
| rs2057476   | 9 102878742 C  | 57 | 29 G                     | 0.0001082  |

|             |                   |    |         |            |
|-------------|-------------------|----|---------|------------|
| rs2485746   | 9 102879336 A     | 24 | 45 G    | 0.0007128  |
| rs846754    | 9 102881455 A     | 57 | 30 T    | 0.0002015  |
| rs846755    | 9 102881777 G     | 57 | 30 C    | 0.0002015  |
| rs846759    | 9 102885911 A     | 56 | 30 G    | 0.0003574  |
| rs846762    | 9 102888321 C     | 56 | 30 T    | 0.0003574  |
| rs1535667   | 9 102894255 T     | 57 | 30 C    | 0.0002015  |
| rs1099908   | 9 102904991 C     | 57 | 30 T    | 0.0002015  |
| rs2476439   | 9 102908076 T     | 57 | 30 G    | 0.0002015  |
| rs846763    | 9 102908721 A     | 57 | 30 G    | 0.0002015  |
| rs11333350  | 9 102911331 C     | 56 | 27 CA   | 0.00002655 |
| rs846766    | 9 102912720 A     | 57 | 30 G    | 0.0002015  |
| rs863668    | 9 102926619 G     | 57 | 30 A    | 0.0002015  |
| rs1099910   | 9 102940575 C     | 57 | 30 A    | 0.0002015  |
| rs143374251 | 9 102942626 GT    | 54 | 30 G    | 0.000587   |
| rs7856844   | 9 102950726 T     | 57 | 30 G    | 0.0002015  |
| rs10819739  | 9 102957705 A     | 57 | 30 C    | 0.0002015  |
| rs71370984  | 9 102957775 A     | 56 | 31 AT   | 0.0005608  |
| rs1999877   | 9 102973719 C     | 57 | 30 A    | 0.0002015  |
| rs1014651   | 9 102976644 G     | 58 | 30 A    | 0.0001111  |
| rs2787364   | 9 102979244 A     | 57 | 30 G    | 0.0002015  |
| rs1572607   | 9 102980669 C     | 57 | 30 T    | 0.0002015  |
| rs1338118   | 9 102982419 T     | 57 | 30 A    | 0.0002015  |
| rs2806681   | 9 102984967 G     | 57 | 30 A    | 0.0002015  |
| rs2806684   | 9 102992336 C     | 57 | 30 T    | 0.0002015  |
| rs2491096   | 9 102998581 T     | 57 | 30 G    | 0.0002015  |
| rs2806685   | 9 102999032 A     | 57 | 30 C    | 0.0002015  |
| rs2787396   | 9 103003632 C     | 57 | 31 A    | 0.0003656  |
| rs2806687   | 9 103005815 T     | 56 | 30 C    | 0.0003574  |
| rs2806688   | 9 103006156 A     | 57 | 30 G    | 0.0002015  |
| rs2787393   | 9 103009415 G     | 57 | 30 T    | 0.0002015  |
| rs10559514  | 9 103009954 T     | 30 | 53 TAAA | 0.0005124  |
| rs142007666 | 9 103011275 G     | 31 | 54 GCTT | 0.0003134  |
| rs112776912 | 9 103012828 GTGTT | 33 | 56 G    | 0.0003196  |
| rs1338121   | 9 103015018 C     | 54 | 29 T    | 0.0006016  |
| rs9408998   | 9 103016838 C     | 54 | 29 T    | 0.0006016  |
| rs7865678   | 9 103017106 A     | 54 | 29 G    | 0.0006016  |
| rs2806689   | 9 103021534 C     | 54 | 29 T    | 0.0006016  |
| rs2806690   | 9 103021647 A     | 54 | 29 G    | 0.0006016  |
| rs1338126   | 9 103038653 C     | 54 | 29 G    | 0.0006016  |
| rs2787382   | 9 103039197 T     | 54 | 29 C    | 0.0006016  |

|             |                      |    |          |            |
|-------------|----------------------|----|----------|------------|
| rs16920204  | 9 104097900 G        | 17 | 38 A     | 0.0003648  |
| rs1341763   | 9 104127127 C        | 19 | 39 T     | 0.0007998  |
| rs10989484  | 9 104132088 G        | 20 | 40 A     | 0.0008835  |
| rs1572983   | 9 104133628 C        | 20 | 40 T     | 0.0008835  |
| rs1891218   | 9 104134777 C        | 20 | 40 T     | 0.0008835  |
| rs10819923  | 9 104137818 G        | 19 | 39 A     | 0.0007998  |
| rs1226146   | 9 104140630 C        | 20 | 40 A     | 0.0008835  |
| rs1226149   | 9 104147083 C        | 20 | 40 T     | 0.0008835  |
| rs10118966  | 9 104152155 C        | 20 | 40 T     | 0.0008835  |
| rs10989486  | 9 104153155 C        | 19 | 39 G     | 0.0007998  |
| rs10760794  | 9 104159217 T        | 51 | 27 C     | 0.0009437  |
| rs963584    | 9 104159859 T        | 51 | 27 C     | 0.0009437  |
| rs12554908  | 9 105697991 C        | 17 | 1 T      | 0.00007397 |
| rs28473692  | 9 105714399 C        | 17 | 1 T      | 0.00007397 |
| rs72742480  | 9 105727753 A        | 17 | 1 G      | 0.00007397 |
| rs170621    | 9 107803370 G        | 30 | 51 A     | 0.0009286  |
| rs2812301   | 9 108208066 A        | 18 | 38 G     | 0.0007166  |
| rs59463718  | 9 108208647 C        | 18 | 38 CTTAT | 0.0007166  |
| rs2771039   | 9 108221252 A        | 18 | 38 G     | 0.0007166  |
| rs2812306   | 9 108221369 A        | 18 | 38 T     | 0.0007166  |
| rs62575095  | 9 108224124 A        | 18 | 38 G     | 0.0007166  |
| rs145768242 | 9 108228282 A        | 18 | 38 ACT   | 0.0007166  |
| rs2771044   | 9 108242839 G        | 18 | 38 C     | 0.0007166  |
| rs7865377   | 9 108256602 A        | 18 | 38 G     | 0.0007166  |
| rs7865160   | 9 108256610 T        | 18 | 38 C     | 0.0007166  |
| rs62575103  | 9 108284699 A        | 18 | 38 G     | 0.0007166  |
| rs62575104  | 9 108290049 T        | 18 | 38 C     | 0.0007166  |
| rs74442717  | 9 108291374 T        | 18 | 38 G     | 0.0007166  |
| rs57432946  | 9 108305782 C        | 18 | 38 G     | 0.0007166  |
| rs149664708 | 9 108309573 TGTGTTTG | 18 | 38 T     | 0.0007166  |
| rs4742651   | 9 108315424 T        | 18 | 38 C     | 0.0007166  |
| rs62575112  | 9 108328228 A        | 18 | 38 G     | 0.0007166  |
| rs4742653   | 9 108328588 C        | 18 | 38 A     | 0.0007166  |
| rs76375684  | 9 108329464 A        | 18 | 38 C     | 0.0007166  |
| rs7024265   | 9 108331234 A        | 18 | 38 G     | 0.0007166  |
| rs4742953   | 9 108335958 C        | 18 | 38 G     | 0.0007166  |
| rs62575116  | 9 108339846 C        | 18 | 38 A     | 0.0007166  |
| rs17309137  | 9 108348138 A        | 18 | 38 G     | 0.0007166  |
| rs17309319  | 9 108350328 A        | 18 | 38 T     | 0.0007166  |
| rs7037972   | 9 108351816 T        | 18 | 38 A     | 0.0007166  |

|             |    |           |                      |    |    |                        |            |
|-------------|----|-----------|----------------------|----|----|------------------------|------------|
| rs59750891  | 9  | 108353179 | A                    | 18 | 38 | AC                     | 0.0007166  |
| rs11399147  | 9  | 108394700 | TA                   | 20 | 43 | T                      | 0.0001658  |
| rs12349610  | 9  | 109404422 | A                    | 3  | 18 | G                      | 0.0003291  |
| rs12350586  | 9  | 109404541 | A                    | 3  | 18 | G                      | 0.0003291  |
| rs2417753   | 9  | 109405667 | G                    | 4  | 19 | A                      | 0.0005969  |
| rs10978580  | 9  | 109410929 | T                    | 4  | 22 | C                      | 0.00008114 |
| rs10816411  | 9  | 109411613 | T                    | 4  | 22 | C                      | 0.00008114 |
| rs7859930   | 9  | 109412031 | T                    | 4  | 22 | A                      | 0.00008114 |
| rs12343926  | 9  | 109412469 | C                    | 2  | 17 | A                      | 0.0001534  |
| rs10816412  | 9  | 109412764 | T                    | 4  | 22 | G                      | 0.00008114 |
| rs10816413  | 9  | 109413318 | A                    | 5  | 23 | G                      | 0.0001426  |
| rs56108151  | 9  | 109514426 | G                    | 3  | 17 | A                      | 0.0006426  |
| rs149747210 | 9  | 109519072 | C                    | 1  | 14 | A                      | 0.0002433  |
| rs77073159  | 9  | 109521642 | C                    | 1  | 14 | T                      | 0.0002433  |
| rs62567160  | 9  | 111122958 | A                    | 27 | 8  | C                      | 0.0006326  |
| 9:115158488 | 9  | 115158488 | G                    | 0  | 10 | T                      | 0.0005917  |
| 9:115158492 | 9  | 115158492 | A                    | 0  | 10 | C                      | 0.0005917  |
| rs7857688   | 9  | 116887845 | A                    | 5  | 21 | G                      | 0.0005184  |
| rs17237455  | 9  | 117483259 | C                    | 8  | 25 | A                      | 0.000871   |
| rs62564879  | 9  | 119790692 | A                    | 0  | 11 | G                      | 0.0002715  |
| 9:126708698 | 9  | 126708698 | CACACACACACACACACACA | 12 | 0  | C                      | 0.0003422  |
| 9:126708699 | 9  | 126708699 | C                    | 12 | 0  | A                      | 0.0003422  |
| rs3012790   | 9  | 137807802 | G                    | 18 | 39 | C                      | 0.0004141  |
| rs2989724   | 9  | 137807917 | T                    | 15 | 36 | C                      | 0.0002717  |
| rs2989725   | 9  | 137808005 | C                    | 18 | 39 | A                      | 0.0004141  |
| rs11103648  | 9  | 137941317 | A                    | 12 | 0  | G                      | 0.0003422  |
| rs564676    | 9  | 137942526 | C                    | 43 | 19 | T                      | 0.0005165  |
| rs11103650  | 9  | 137942656 | A                    | 12 | 0  | G                      | 0.0003422  |
| rs684270    | 9  | 137943925 | G                    | 42 | 19 | A                      | 0.0008809  |
| rs35973213  | 9  | 137960753 | G                    | 14 | 0  | A                      | 0.00007436 |
| rs75796057  | 9  | 137961094 | A                    | 15 | 0  | G                      | 0.00003433 |
| rs1679644   | 9  | 137962381 | A                    | 24 | 4  | T                      | 0.00005751 |
| rs112072815 | 10 | 1990334   | T                    | 0  | 14 | C                      | 0.00002513 |
| rs11250953  | 10 | 1991144   | C                    | 0  | 15 | G                      | 0.0000112  |
| rs17157353  | 10 | 1992873   | T                    | 0  | 15 | C                      | 0.0000112  |
| rs11250954  | 10 | 1993586   | T                    | 0  | 15 | G                      | 0.0000112  |
| 10:2362186  | 10 | 2362186   | C                    | 4  | 20 | CACACA                 | 0.0003114  |
| rs138359959 | 10 | 3318900   | C                    | 16 | 1  | CTCAAACCCAAATCCCGAAACA | 0.0001802  |
| rs34380691  | 10 | 6388161   | G                    | 27 | 8  | GA                     | 0.0006326  |
| rs7074425   | 10 | 6984652   | A                    | 5  | 23 | T                      | 0.0001426  |

|             |    |          |   |    |    |                  |           |
|-------------|----|----------|---|----|----|------------------|-----------|
| rs7087785   | 10 | 6984954  | A | 6  | 23 | C                | 0.000429  |
| rs10905091  | 10 | 7049985  | T | 27 | 7  | C                | 0.0002486 |
| rs77372529  | 10 | 7066921  | A | 22 | 4  | G                | 0.0002148 |
| rs2277225   | 10 | 7244675  | A | 14 | 36 | G                | 0.0001265 |
| rs7920088   | 10 | 7250148  | T | 14 | 36 | C                | 0.0001265 |
| rs61835084  | 10 | 7250882  | T | 14 | 36 | C                | 0.0001265 |
| rs61835085  | 10 | 7250885  | T | 14 | 36 | C                | 0.0001265 |
| 10:10105662 | 10 | 10105662 | C | 28 | 8  | CA               | 0.0002958 |
| 10:10105663 | 10 | 10105663 | C | 28 | 7  | A                | 0.0001108 |
| rs78762327  | 10 | 10750115 | A | 11 | 0  | G                | 0.0007274 |
| 10:13898218 | 10 | 13898218 | G | 52 | 28 | GTGTGTGTGTGTGTGT | 0.0009847 |
| rs2883453   | 10 | 16008550 | G | 32 | 54 | A                | 0.0005601 |
| rs4748234   | 10 | 16029510 | C | 29 | 50 | T                | 0.0009027 |
| rs11305639  | 10 | 16029660 | A | 28 | 50 | AT               | 0.0005077 |
| rs950220    | 10 | 16052784 | C | 32 | 55 | A                | 0.0003175 |
| rs10752031  | 10 | 16060056 | G | 30 | 51 | T                | 0.0009286 |
| rs151110139 | 10 | 18234143 | A | 21 | 4  | ATTTTC           | 0.0004069 |
| rs35032081  | 10 | 18237482 | G | 18 | 2  | GA               | 0.000203  |
| rs12242670  | 10 | 18238054 | T | 17 | 2  | C                | 0.0004014 |
| rs35598022  | 10 | 18245990 | G | 19 | 2  | T                | 0.0001015 |
| rs11011704  | 10 | 18247677 | T | 19 | 2  | G                | 0.0001015 |
| rs11593092  | 10 | 18248136 | A | 19 | 2  | G                | 0.0001015 |
| rs7074683   | 10 | 18249973 | A | 19 | 2  | G                | 0.0001015 |
| rs12260894  | 10 | 18252211 | G | 19 | 2  | C                | 0.0001015 |
| rs12761871  | 10 | 18252449 | A | 19 | 2  | G                | 0.0001015 |
| rs61022323  | 10 | 18256517 | G | 19 | 2  | A                | 0.0001015 |
| rs12263430  | 10 | 18257612 | G | 19 | 2  | A                | 0.0001015 |
| rs11592271  | 10 | 18262041 | C | 19 | 2  | A                | 0.0001015 |
| rs76522551  | 10 | 19411160 | A | 14 | 1  | G                | 0.0006347 |
| rs12358258  | 10 | 20311687 | T | 27 | 8  | C                | 0.0006326 |
| rs786871    | 10 | 26765474 | G | 36 | 14 | T                | 0.0007756 |
| rs12412826  | 10 | 26778606 | A | 2  | 15 | G                | 0.0006243 |
| rs112903628 | 10 | 26780794 | A | 2  | 15 | G                | 0.0006243 |
| rs72803274  | 10 | 26782556 | A | 2  | 15 | G                | 0.0006243 |
| rs2039976   | 10 | 29192769 | C | 29 | 8  | T                | 0.0001956 |
| rs2039977   | 10 | 29192854 | C | 29 | 8  | T                | 0.0001956 |
| rs61838422  | 10 | 29194184 | C | 21 | 4  | T                | 0.0004069 |
| rs11007308  | 10 | 29196847 | C | 29 | 9  | T                | 0.0004831 |
| rs7084821   | 10 | 29200793 | G | 30 | 8  | A                | 0.0001064 |
| rs2047242   | 10 | 29201860 | A | 30 | 8  | G                | 0.0001064 |

|             |    |          |   |    |    |           |              |
|-------------|----|----------|---|----|----|-----------|--------------|
| rs2047241   | 10 | 29201960 | G | 30 | 9  | A         | 0.0002709    |
| rs35575195  | 10 | 29203067 | A | 5  | 20 | C         | 0.0009659    |
| 10:30752552 | 10 | 30752552 | T | 0  | 11 | C         | 0.0007003    |
| rs12773194  | 10 | 34954301 | T | 23 | 44 | A         | 0.000608     |
| rs61843267  | 10 | 35567246 | G | 25 | 7  | C         | 0.0008092    |
| rs61850546  | 10 | 35808629 | A | 25 | 7  | G         | 0.0008092    |
| rs200789076 | 10 | 39102188 | T | 1  | 13 | A         | 0.0005059    |
| 10:42711053 | 10 | 42711053 | A | 22 | 3  | T         | 0.00005724   |
| rs201165034 | 10 | 47381269 | A | 27 | 8  | G         | 0.0006326    |
| rs72792266  | 10 | 49518130 | A | 15 | 1  | G         | 0.0003131    |
| rs12767241  | 10 | 53038459 | A | 29 | 9  | G         | 0.0004831    |
| rs74132547  | 10 | 53407805 | T | 0  | 10 | C         | 0.0005917    |
| rs2264662   | 10 | 54786789 | G | 29 | 10 | A         | 0.0009776    |
| rs4935388   | 10 | 54858559 | T | 36 | 14 | G         | 0.0007756    |
| rs4935389   | 10 | 54858786 | A | 36 | 14 | T         | 0.0007756    |
| rs12241649  | 10 | 54861336 | G | 36 | 14 | A         | 0.0007756    |
| rs10218930  | 10 | 54865321 | G | 35 | 13 | A         | 0.0006539    |
| rs11003388  | 10 | 54865331 | T | 35 | 13 | A         | 0.0006539    |
| rs11003390  | 10 | 54867026 | G | 36 | 14 | A         | 0.0007756    |
| rs10824889  | 10 | 54868196 | C | 36 | 14 | T         | 0.0007756    |
| rs4007215   | 10 | 56337604 | A | 42 | 9  | AAATAAATG | 0.0000001416 |
| rs72051960  | 10 | 56337612 | G | 34 | 5  | GAATA     | 0.0000001264 |
| 10:56982508 | 10 | 56982508 | C | 44 | 20 | T         | 0.0009594    |
| rs10825992  | 10 | 58948207 | G | 17 | 37 | T         | 0.0006349    |
| rs10825993  | 10 | 58948297 | A | 16 | 36 | C         | 0.0005556    |
| rs10825994  | 10 | 58948493 | A | 16 | 36 | C         | 0.0005556    |
| rs10763457  | 10 | 58949188 | C | 16 | 36 | G         | 0.0005556    |
| rs35674272  | 10 | 58951433 | C | 16 | 36 | T         | 0.0005556    |
| rs7085570   | 10 | 58952843 | G | 16 | 36 | C         | 0.0005556    |
| rs2393225   | 10 | 58954023 | A | 16 | 36 | C         | 0.0005556    |
| rs11005689  | 10 | 58957056 | A | 16 | 36 | G         | 0.0005556    |
| 10:61618959 | 10 | 61618959 | A | 0  | 12 | T         | 0.0001421    |
| 10:66724249 | 10 | 66724249 | G | 22 | 3  | A         | 0.00005724   |
| rs1462829   | 10 | 67978350 | T | 19 | 2  | C         | 0.0001015    |
| rs6480148   | 10 | 67979752 | A | 19 | 2  | G         | 0.0001015    |
| rs17835285  | 10 | 67981102 | C | 19 | 2  | T         | 0.0001015    |
| rs138734267 | 10 | 67983620 | G | 19 | 2  | GT        | 0.0001015    |
| rs56350854  | 10 | 67985736 | C | 19 | 2  | G         | 0.0001015    |
| rs78558138  | 10 | 67989485 | A | 19 | 2  | AT        | 0.0001015    |
| rs72797255  | 10 | 67990772 | T | 19 | 2  | C         | 0.0001015    |



|             |    |           |    |    |    |        |            |
|-------------|----|-----------|----|----|----|--------|------------|
| rs72797256  | 10 | 67991072  | C  | 19 | 2  | T      | 0.0001015  |
| rs72797257  | 10 | 67991105  | C  | 19 | 2  | T      | 0.0001015  |
| rs72797258  | 10 | 67991893  | A  | 19 | 2  | C      | 0.0001015  |
| rs72797259  | 10 | 67991947  | T  | 19 | 2  | G      | 0.0001015  |
| rs147898764 | 10 | 67992698  | A  | 19 | 2  | G      | 0.0001015  |
| rs141673860 | 10 | 67992739  | A  | 19 | 2  | C      | 0.0001015  |
| rs72797265  | 10 | 67993744  | G  | 19 | 2  | T      | 0.0001015  |
| rs72797267  | 10 | 67993887  | A  | 19 | 2  | G      | 0.0001015  |
| rs72797269  | 10 | 67994426  | A  | 19 | 2  | G      | 0.0001015  |
| rs6480151   | 10 | 67994452  | T  | 34 | 12 | A      | 0.0003362  |
| rs67876961  | 10 | 67994904  | G  | 34 | 12 | A      | 0.0003362  |
| rs72797275  | 10 | 67997207  | T  | 19 | 2  | C      | 0.0001015  |
| rs118051852 | 10 | 70666068  | C  | 0  | 10 | G      | 0.0005917  |
| rs117613158 | 10 | 70675979  | A  | 0  | 10 | G      | 0.0005917  |
| 10:70689049 | 10 | 70689049  | CT | 2  | 17 | C      | 0.0003704  |
| 10:70689077 | 10 | 70689077  | C  | 0  | 10 | CTCTT  | 0.0005917  |
| rs12416545  | 10 | 70689108  | C  | 0  | 10 | T      | 0.0005917  |
| rs143763855 | 10 | 70726465  | A  | 0  | 10 | G      | 0.0005917  |
| rs188524170 | 10 | 70759912  | T  | 0  | 10 | C      | 0.0005917  |
| rs142684333 | 10 | 70769102  | G  | 0  | 10 | A      | 0.0005917  |
| rs117103198 | 10 | 70778071  | C  | 0  | 11 | T      | 0.0002715  |
| rs138629322 | 10 | 70779248  | C  | 0  | 11 | G      | 0.0002715  |
| rs79346133  | 10 | 70783648  | T  | 0  | 11 | C      | 0.0002715  |
| rs114000842 | 10 | 70785490  | G  | 0  | 11 | T      | 0.0002715  |
| 10:70798818 | 10 | 70798818  | T  | 0  | 10 | TCTTTC | 0.0005917  |
| rs10823635  | 10 | 72660331  | T  | 32 | 11 | C      | 0.0004661  |
| rs146991153 | 10 | 72665149  | C  | 15 | 1  | CT     | 0.0003131  |
| rs59844598  | 10 | 72665926  | T  | 28 | 8  | C      | 0.0003544  |
| rs78785419  | 10 | 72666056  | A  | 28 | 8  | AG     | 0.0003544  |
| rs827344    | 10 | 72667037  | G  | 42 | 17 | C      | 0.0002305  |
| rs61851192  | 10 | 72668090  | G  | 28 | 8  | A      | 0.0003544  |
| 10:78931156 | 10 | 78931156  | T  | 12 | 0  | TGC    | 0.0003422  |
| rs11188859  | 10 | 82964158  | A  | 0  | 10 | G      | 0.0005917  |
| 10:83017314 | 10 | 83017314  | C  | 9  | 31 | T      | 0.00002809 |
| rs9664118   | 10 | 85056923  | A  | 0  | 10 | G      | 0.0006636  |
| rs11200564  | 10 | 85536772  | A  | 26 | 7  | G      | 0.0004518  |
| rs55637662  | 10 | 95154278  | T  | 3  | 17 | C      | 0.0007114  |
| rs35145082  | 10 | 108418072 | TA | 13 | 0  | T      | 0.0001585  |
| rs12775106  | 10 | 108600601 | T  | 39 | 17 | A      | 0.0006713  |
| rs67682061  | 10 | 108600620 | T  | 36 | 14 | TA     | 0.0007721  |

|             |    |           |    |    |    |                   |            |
|-------------|----|-----------|----|----|----|-------------------|------------|
| rs140471525 | 10 | 109403372 | A  | 11 | 0  | G                 | 0.0007274  |
| rs12220594  | 10 | 112997939 | C  | 11 | 0  | T                 | 0.0007274  |
| rs10787977  | 10 | 121298412 | T  | 1  | 13 | C                 | 0.0005059  |
| rs7895986   | 10 | 129234522 | G  | 21 | 41 | T                 | 0.0009669  |
| rs1887097   | 10 | 129236512 | G  | 21 | 44 | A                 | 0.0001836  |
| rs2275052   | 10 | 129237580 | T  | 14 | 36 | C                 | 0.0001265  |
| rs11815834  | 10 | 129238058 | G  | 14 | 36 | A                 | 0.0001265  |
| rs56042331  | 10 | 129764846 | A  | 1  | 13 | G                 | 0.0005059  |
| rs201546056 | 11 | 133399    | G  | 11 | 0  | C                 | 0.0007228  |
| rs17225881  | 11 | 4699499   | G  | 13 | 0  | A                 | 0.00016    |
| rs12363468  | 11 | 6074049   | G  | 1  | 13 | A                 | 0.0005059  |
| rs7121476   | 11 | 8258184   | G  | 48 | 23 | A                 | 0.0004351  |
| rs439667    | 11 | 8259358   | C  | 38 | 12 | G                 | 0.00005024 |
| rs55925157  | 11 | 8273447   | A  | 26 | 46 | AGTGTGTGGTGG      | 0.0007601  |
| rs11041827  | 11 | 8274699   | T  | 29 | 51 | C                 | 0.0005253  |
| rs4256972   | 11 | 8275004   | T  | 29 | 51 | C                 | 0.0005253  |
| rs11041828  | 11 | 8275294   | T  | 29 | 51 | C                 | 0.0005253  |
| rs4237770   | 11 | 8275835   | C  | 29 | 51 | T                 | 0.0005253  |
| rs369776490 | 11 | 8276156   | T  | 29 | 51 | TATGGTCCCTCCCCACC | 0.0005253  |
| rs373931277 | 11 | 8276174   | A  | 29 | 51 | AGGCTGGC          | 0.0005253  |
| rs149239827 | 11 | 8276184   | T  | 29 | 51 | TGG               | 0.0005253  |
| rs1454439   | 11 | 8276219   | C  | 29 | 51 | A                 | 0.0005253  |
| rs4758055   | 11 | 8277435   | C  | 35 | 55 | G                 | 0.0005984  |
| rs12802521  | 11 | 8277575   | G  | 34 | 56 | T                 | 0.0005669  |
| rs12797411  | 11 | 8277594   | G  | 34 | 57 | A                 | 0.0002058  |
| rs71463719  | 11 | 8277624   | G  | 57 | 31 | A                 | 0.0003656  |
| rs11041830  | 11 | 8277807   | A  | 57 | 31 | C                 | 0.0003656  |
| rs10840009  | 11 | 8323539   | C  | 13 | 34 | A                 | 0.0001896  |
| rs4758334   | 11 | 8330158   | A  | 14 | 34 | C                 | 0.0004075  |
| rs897104    | 11 | 8330616   | A  | 14 | 34 | G                 | 0.0004075  |
| rs10743067  | 11 | 8330987   | A  | 14 | 33 | G                 | 0.0007122  |
| rs202017636 | 11 | 9624708   | CT | 22 | 44 | C                 | 0.0009242  |
| rs1791839   | 11 | 21178709  | A  | 19 | 39 | G                 | 0.0007998  |
| rs2593688   | 11 | 22389031  | C  | 24 | 46 | T                 | 0.0004131  |
| rs1374720   | 11 | 22389827  | A  | 24 | 46 | T                 | 0.0004131  |
| rs2593685   | 11 | 22391419  | C  | 24 | 46 | T                 | 0.0004131  |
| rs2665677   | 11 | 22391534  | G  | 24 | 46 | A                 | 0.0004131  |
| rs764021    | 11 | 22393124  | C  | 24 | 46 | T                 | 0.0004131  |
| rs764022    | 11 | 22393157  | C  | 24 | 46 | G                 | 0.0004131  |
| rs2248436   | 11 | 22397739  | A  | 24 | 46 | C                 | 0.0004131  |

|             |    |          |                     |    |    |              |            |
|-------------|----|----------|---------------------|----|----|--------------|------------|
| rs2665699   | 11 | 22402276 | A                   | 24 | 46 | G            | 0.0004131  |
| rs2665704   | 11 | 22408655 | G                   | 22 | 45 | A            | 0.0002011  |
| rs2665705   | 11 | 22408803 | T                   | 22 | 45 | C            | 0.0002011  |
| rs721840    | 11 | 22411865 | C                   | 22 | 45 | T            | 0.0002011  |
| rs721841    | 11 | 22411969 | C                   | 22 | 45 | G            | 0.0002011  |
| rs2593649   | 11 | 22413033 | T                   | 22 | 45 | C            | 0.0002011  |
| rs2665712   | 11 | 22414861 | C                   | 22 | 45 | G            | 0.0002011  |
| rs2665713   | 11 | 22417107 | A                   | 22 | 45 | G            | 0.0002011  |
| rs1447504   | 11 | 22417712 | A                   | 22 | 45 | T            | 0.0002011  |
| rs726858    | 11 | 22418220 | T                   | 22 | 45 | G            | 0.0002011  |
| rs726859    | 11 | 22418570 | A                   | 22 | 45 | G            | 0.0002011  |
| rs2593651   | 11 | 22420611 | G                   | 22 | 45 | A            | 0.0002011  |
| rs2593652   | 11 | 22421015 | T                   | 22 | 45 | C            | 0.0002011  |
| rs2593653   | 11 | 22422503 | G                   | 21 | 45 | C            | 0.0001015  |
| rs111974052 | 11 | 22423006 | A                   | 22 | 45 | AATGACTATTTG | 0.0002011  |
| rs2593657   | 11 | 22423166 | T                   | 22 | 45 | C            | 0.0002011  |
| rs35078276  | 11 | 22423689 | C                   | 22 | 45 | T            | 0.0002011  |
| rs34754498  | 11 | 22423691 | G                   | 22 | 45 | T            | 0.0002011  |
| rs34550272  | 11 | 22423693 | C                   | 22 | 45 | T            | 0.0002011  |
| rs4923000   | 11 | 22423752 | A                   | 22 | 45 | C            | 0.0002011  |
| rs2593660   | 11 | 22424782 | C                   | 22 | 46 | A            | 0.0001115  |
| rs5790261   | 11 | 22425340 | TG                  | 21 | 45 | T            | 0.0001015  |
| rs2593663   | 11 | 22428384 | C                   | 22 | 45 | T            | 0.0002011  |
| rs2665718   | 11 | 22428882 | G                   | 22 | 45 | A            | 0.0002011  |
| rs3106185   | 11 | 22435111 | C                   | 22 | 45 | A            | 0.0002011  |
| rs71445462  | 11 | 23567476 | TA                  | 8  | 26 | T            | 0.0004835  |
| rs7131015   | 11 | 24787901 | T                   | 17 | 2  | G            | 0.0004014  |
| rs11028152  | 11 | 24788677 | A                   | 17 | 2  | G            | 0.0004014  |
| rs1065138   | 11 | 34379280 | A                   | 0  | 13 | G            | 0.00005596 |
| rs150240560 | 11 | 34402655 | T                   | 0  | 13 | TC           | 0.00005596 |
| rs10160662  | 11 | 34405010 | A                   | 0  | 13 | C            | 0.00005596 |
| rs11032644  | 11 | 34410017 | T                   | 0  | 13 | C            | 0.00005596 |
| rs12276589  | 11 | 34414176 | A                   | 0  | 13 | T            | 0.00005596 |
| rs12271710  | 11 | 34415592 | A                   | 0  | 13 | G            | 0.00005596 |
| 11:37161690 | 11 | 37161690 | TTTAA               | 26 | 48 | T            | 0.0004647  |
| 11:38232883 | 11 | 38232883 | AAGAAAAGAAAAGAAAAGA | 0  | 11 | A            | 0.0002715  |
| rs117740926 | 11 | 40776914 | T                   | 0  | 11 | C            | 0.0002715  |
| 11:45693756 | 11 | 45693756 | GT                  | 28 | 49 | G            | 0.0008723  |
| 11:45693757 | 11 | 45693757 | T                   | 28 | 49 | G            | 0.0008723  |
| 11:45693758 | 11 | 45693758 | GTGTGTGT            | 28 | 49 | G            | 0.0008723  |

|             |    |                |    |                     |           |
|-------------|----|----------------|----|---------------------|-----------|
| rs201302583 | 11 | 45693759 T     | 26 | 47 TGA              | 0.0007993 |
| 11:46733346 | 11 | 46733346 A     | 4  | 19 T                | 0.0006572 |
| 11:48890092 | 11 | 48890092 C     | 2  | 16 T                | 0.0003115 |
| rs200512388 | 11 | 49292241 AAC   | 35 | 13 A                | 0.0006539 |
| rs1164663   | 11 | 49294723 T     | 35 | 13 A                | 0.0006539 |
| rs1164664   | 11 | 49295542 G     | 35 | 13 T                | 0.0006539 |
| rs1164665   | 11 | 49295630 C     | 35 | 13 T                | 0.0006539 |
| rs35301434  | 11 | 49511910 CT    | 36 | 14 C                | 0.0007721 |
| rs7945981   | 11 | 50189879 G     | 28 | 9 A                 | 0.0006921 |
| 11:55471124 | 11 | 55471124 CACAG | 44 | 20 C                | 0.0005739 |
| rs4939191   | 11 | 57988941 A     | 12 | 31 G                | 0.0007705 |
| rs200541435 | 11 | 61702896 A     | 4  | 19 AAAAAAAAAAAAAAAG | 0.0005969 |
| rs10897275  | 11 | 62203865 A     | 42 | 19 G                | 0.0008809 |
| rs9645690   | 11 | 62206288 T     | 42 | 19 C                | 0.0008809 |
| rs56299751  | 11 | 62208039 A     | 43 | 19 G                | 0.0005165 |
| rs11231093  | 11 | 62210822 A     | 42 | 17 G                | 0.0002559 |
| rs10897278  | 11 | 62213068 A     | 43 | 19 G                | 0.0005165 |
| 11:71910931 | 11 | 71910931 T     | 41 | 18 TGTG             | 0.0003968 |
| rs377432    | 11 | 72358817 T     | 26 | 7 C                 | 0.0004518 |
| rs459854    | 11 | 72359259 A     | 26 | 7 T                 | 0.0004518 |
| rs163693    | 11 | 72360787 T     | 26 | 7 C                 | 0.0004518 |
| rs17369284  | 11 | 81022917 G     | 0  | 10 A                | 0.0005917 |
| rs56177670  | 11 | 81023418 A     | 0  | 10 G                | 0.0005917 |
| rs78577737  | 11 | 81026664 T     | 0  | 10 C                | 0.0005917 |
| rs55822564  | 11 | 81030553 G     | 0  | 10 A                | 0.0005917 |
| rs55811617  | 11 | 81030577 T     | 0  | 10 C                | 0.0005917 |
| rs17369881  | 11 | 81031398 C     | 0  | 10 A                | 0.0005917 |
| rs79645796  | 11 | 81031525 G     | 0  | 10 A                | 0.0005917 |
| rs74590293  | 11 | 81031537 G     | 0  | 10 T                | 0.0005917 |
| rs17369902  | 11 | 81031588 T     | 0  | 10 G                | 0.0005917 |
| rs142751767 | 11 | 81031639 C     | 0  | 10 CA               | 0.0005917 |
| rs17435637  | 11 | 81032637 A     | 0  | 10 G                | 0.0005917 |
| rs78294947  | 11 | 81033308 C     | 0  | 10 T                | 0.0005917 |
| rs115120279 | 11 | 81033409 C     | 0  | 10 T                | 0.0005917 |
| rs17369997  | 11 | 81034927 C     | 0  | 10 A                | 0.0005917 |
| rs56334566  | 11 | 81035122 T     | 0  | 10 TC               | 0.0005917 |
| rs17141960  | 11 | 81035167 T     | 0  | 10 C                | 0.0005917 |
| rs77455791  | 11 | 81036467 A     | 0  | 10 T                | 0.0005917 |
| rs78348012  | 11 | 81036606 T     | 0  | 10 C                | 0.0005917 |
| rs76083398  | 11 | 81037599 T     | 0  | 10 G                | 0.0005917 |

|             |    |                |   |         |           |
|-------------|----|----------------|---|---------|-----------|
| rs17370219  | 11 | 81037858 C     | 0 | 10 T    | 0.0005917 |
| rs116957049 | 11 | 81038128 G     | 0 | 10 A    | 0.0005917 |
| rs200508407 | 11 | 81038215 CA    | 0 | 10 C    | 0.0005917 |
| rs77489824  | 11 | 81042247 A     | 0 | 10 C    | 0.0005917 |
| rs79001473  | 11 | 81043432 G     | 0 | 10 A    | 0.0005917 |
| rs77224744  | 11 | 81044607 T     | 0 | 10 C    | 0.0005917 |
| rs114629989 | 11 | 81044656 A     | 0 | 10 G    | 0.0005917 |
| rs182228872 | 11 | 81053076 G     | 0 | 10 T    | 0.0005917 |
| rs185331674 | 11 | 81053077 T     | 0 | 10 C    | 0.0005917 |
| rs80328220  | 11 | 81053637 T     | 0 | 10 A    | 0.0005917 |
| rs147003829 | 11 | 81054364 AT    | 0 | 10 A    | 0.0005917 |
| rs78005260  | 11 | 81054839 A     | 0 | 10 G    | 0.0005917 |
| rs76081894  | 11 | 81057977 C     | 0 | 10 T    | 0.0005917 |
| rs17371832  | 11 | 81059371 T     | 0 | 10 C    | 0.0005917 |
| rs151150014 | 11 | 81060030 CATTT | 0 | 10 C    | 0.0005917 |
| rs56240555  | 11 | 81062072 A     | 0 | 10 G    | 0.0005917 |
| rs7114073   | 11 | 81063336 A     | 0 | 10 T    | 0.0005917 |
| rs55908086  | 11 | 81064868 T     | 0 | 10 C    | 0.0005917 |
| rs139935298 | 11 | 81069039 T     | 0 | 10 G    | 0.0005917 |
| rs116471067 | 11 | 81069721 G     | 0 | 10 A    | 0.0005917 |
| rs146868223 | 11 | 81071462 TAC   | 0 | 10 T    | 0.0005917 |
| rs140721601 | 11 | 81071566 T     | 0 | 10 TAC  | 0.0005917 |
| rs17372055  | 11 | 81073164 T     | 0 | 10 C    | 0.0005917 |
| rs17437784  | 11 | 81074310 T     | 0 | 10 C    | 0.0005917 |
| rs56314671  | 11 | 81074741 C     | 0 | 10 T    | 0.0005917 |
| rs72117550  | 11 | 81074777 C     | 0 | 10 CTTG | 0.0005917 |
| rs7358497   | 11 | 81075865 A     | 0 | 10 G    | 0.0005917 |
| rs150387842 | 11 | 81079159 A     | 0 | 10 G    | 0.0005917 |
| rs56085595  | 11 | 81081353 T     | 0 | 10 C    | 0.0005917 |
| rs200435150 | 11 | 81085102 T     | 0 | 10 TTC  | 0.0005917 |
| rs56025716  | 11 | 81086580 G     | 0 | 10 T    | 0.0005917 |
| rs56032706  | 11 | 81086849 T     | 0 | 10 A    | 0.0005917 |
| rs80138882  | 11 | 81090085 A     | 0 | 10 C    | 0.0005917 |
| rs74639108  | 11 | 81091305 G     | 0 | 10 A    | 0.0005917 |
| rs56043695  | 11 | 81092528 A     | 0 | 10 G    | 0.0005917 |
| rs78927185  | 11 | 81093572 T     | 0 | 10 A    | 0.0005917 |
| rs57921519  | 11 | 81095156 T     | 0 | 10 G    | 0.0005917 |
| rs12292395  | 11 | 81096278 G     | 0 | 10 A    | 0.0005917 |
| rs12288180  | 11 | 81097453 C     | 0 | 10 T    | 0.0005917 |
| rs78410493  | 11 | 81101455 G     | 0 | 10 C    | 0.0005917 |

|             |    |          |       |    |    |               |           |
|-------------|----|----------|-------|----|----|---------------|-----------|
| rs75692693  | 11 | 81104851 | A     | 0  | 10 | C             | 0.0005917 |
| rs74374738  | 11 | 81107512 | A     | 0  | 10 | G             | 0.0005917 |
| rs17439276  | 11 | 81108596 | C     | 0  | 10 | T             | 0.0005917 |
| rs77564017  | 11 | 81118376 | C     | 0  | 10 | T             | 0.0005917 |
| rs74941333  | 11 | 81119042 | T     | 0  | 10 | G             | 0.0005917 |
| rs17439996  | 11 | 81122694 | C     | 0  | 10 | T             | 0.0005917 |
| rs56135807  | 11 | 81126313 | T     | 0  | 10 | C             | 0.0005917 |
| rs74502333  | 11 | 81127188 | T     | 0  | 10 | C             | 0.0005917 |
| 11:81127561 | 11 | 81127561 | C     | 0  | 10 | CCTCTGTGTGTGT | 0.0005917 |
| rs17440143  | 11 | 81128565 | C     | 0  | 10 | T             | 0.0005917 |
| rs139433786 | 11 | 81128988 | TGATC | 0  | 10 | T             | 0.0005917 |
| rs147579820 | 11 | 81129670 | CTG   | 0  | 10 | C             | 0.0005917 |
| rs17440276  | 11 | 81130250 | C     | 0  | 10 | G             | 0.0005917 |
| rs148887234 | 11 | 81130953 | TGA   | 0  | 10 | T             | 0.0005917 |
| rs17440290  | 11 | 81131518 | C     | 0  | 10 | A             | 0.0005917 |
| rs17440339  | 11 | 81132432 | A     | 0  | 10 | C             | 0.0005917 |
| rs5792972   | 11 | 81525938 | C     | 6  | 22 | CTT           | 0.0007482 |
| 11:83019686 | 11 | 83019686 | G     | 35 | 12 | A             | 0.0003064 |
| 11:83019706 | 11 | 83019706 | T     | 30 | 10 | A             | 0.0006347 |
| rs10501586  | 11 | 84756077 | C     | 34 | 12 | T             | 0.0003362 |
| rs11234273  | 11 | 84762531 | T     | 36 | 14 | C             | 0.0007756 |
| rs10898349  | 11 | 84766179 | A     | 33 | 12 | T             | 0.0005855 |
| rs10898350  | 11 | 84766288 | T     | 33 | 12 | A             | 0.0005855 |
| rs11234277  | 11 | 84774564 | A     | 34 | 12 | G             | 0.0003362 |
| rs34936538  | 11 | 84776609 | A     | 34 | 12 | AT            | 0.0003362 |
| rs7127854   | 11 | 84777176 | C     | 35 | 12 | T             | 0.0003064 |
| rs4402316   | 11 | 84780098 | C     | 36 | 14 | G             | 0.0007756 |
| rs4424693   | 11 | 84780124 | G     | 34 | 12 | T             | 0.0003362 |
| rs10898358  | 11 | 84782126 | T     | 37 | 14 | C             | 0.0004475 |
| rs4944507   | 11 | 84783389 | T     | 33 | 12 | G             | 0.0005855 |
| rs11234289  | 11 | 84783934 | C     | 40 | 17 | T             | 0.0006981 |
| rs1826613   | 11 | 84786132 | T     | 36 | 14 | C             | 0.0007756 |
| rs10898359  | 11 | 84786445 | C     | 37 | 14 | T             | 0.0004475 |
| rs7118119   | 11 | 84787554 | C     | 37 | 14 | T             | 0.0004475 |
| rs7102107   | 11 | 84787736 | G     | 37 | 14 | A             | 0.0004475 |
| rs1377302   | 11 | 84799264 | T     | 37 | 14 | C             | 0.0004475 |
| rs1377303   | 11 | 84799479 | A     | 37 | 14 | G             | 0.0004475 |
| rs9634002   | 11 | 84799726 | A     | 37 | 14 | C             | 0.0004475 |
| rs9634003   | 11 | 84799851 | A     | 37 | 14 | G             | 0.0004475 |
| rs9634018   | 11 | 84799874 | C     | 37 | 14 | T             | 0.0004475 |

|              |    |           |                    |    |    |        |            |
|--------------|----|-----------|--------------------|----|----|--------|------------|
| rs9634004    | 11 | 84800022  | C                  | 37 | 14 | A      | 0.0004475  |
| rs57719262   | 11 | 87207380  | A                  | 12 | 0  | G      | 0.0003422  |
| rs79744783   | 11 | 87211218  | T                  | 11 | 0  | C      | 0.0007274  |
| 11:87337925  | 11 | 87337925  | C                  | 11 | 0  | A      | 0.0007274  |
| rs117152419  | 11 | 87362825  | G                  | 11 | 0  | A      | 0.0007274  |
| rs308788     | 11 | 88285408  | C                  | 3  | 18 | T      | 0.0003291  |
| rs308787     | 11 | 88285704  | C                  | 3  | 18 | T      | 0.0003291  |
| rs308786     | 11 | 88285887  | G                  | 3  | 18 | A      | 0.0003291  |
| rs308785     | 11 | 88286031  | G                  | 3  | 18 | T      | 0.0003291  |
| rs308763     | 11 | 88289360  | A                  | 3  | 17 | G      | 0.0006426  |
| rs16914244   | 11 | 88295675  | G                  | 2  | 15 | T      | 0.0006243  |
| rs308872     | 11 | 88295873  | G                  | 3  | 17 | C      | 0.0006426  |
| rs308874     | 11 | 88297066  | T                  | 3  | 17 | C      | 0.0006426  |
| rs7949902    | 11 | 88297748  | C                  | 2  | 15 | T      | 0.0006243  |
| rs60953957   | 11 | 88308583  | A                  | 2  | 15 | ATTTAT | 0.0006243  |
| rs3913664    | 11 | 88313677  | T                  | 2  | 15 | C      | 0.0006243  |
| rs565969     | 11 | 95115165  | T                  | 26 | 7  | C      | 0.0004518  |
| rs522405     | 11 | 103300023 | C                  | 5  | 20 | T      | 0.0009659  |
| rs646311     | 11 | 103300854 | A                  | 5  | 20 | C      | 0.0009659  |
| rs617658     | 11 | 103302733 | G                  | 5  | 20 | C      | 0.0009659  |
| rs637166     | 11 | 103308611 | A                  | 5  | 20 | G      | 0.0009659  |
| rs546524     | 11 | 103309088 | C                  | 5  | 20 | T      | 0.0009659  |
| rs146675248  | 11 | 103361949 | ACCACTGAAAGATGGTTT | 2  | 15 | A      | 0.0006243  |
| rs34239719   | 11 | 103863119 | G                  | 14 | 1  | A      | 0.0006347  |
| 11:104241136 | 11 | 104241136 | A                  | 5  | 24 | ATG    | 0.00007319 |
| 11:104241140 | 11 | 104241140 | A                  | 5  | 24 | ATATG  | 0.00007319 |
| 11:113378629 | 11 | 113378629 | G                  | 21 | 42 | T      | 0.00006852 |
| rs10892138   | 11 | 117437699 | G                  | 15 | 1  | T      | 0.0003131  |
| rs59765231   | 11 | 117438189 | C                  | 15 | 1  | T      | 0.0003131  |
| rs648740     | 11 | 117447373 | A                  | 14 | 1  | G      | 0.0006347  |
| rs12799825   | 11 | 117448013 | A                  | 15 | 1  | C      | 0.0003131  |
| rs681046     | 11 | 117452212 | C                  | 15 | 1  | T      | 0.0003131  |
| rs512393     | 11 | 119823440 | C                  | 7  | 25 | G      | 0.0003419  |
| rs595167     | 11 | 119853430 | T                  | 8  | 25 | C      | 0.000871   |
| rs5795209    | 11 | 119882854 | G                  | 20 | 40 | GT     | 0.0008835  |
| rs61897906   | 11 | 119887951 | A                  | 20 | 40 | G      | 0.0008835  |
| 11:119889757 | 11 | 119889757 | CCG                | 20 | 40 | C      | 0.0008835  |
| rs668400     | 11 | 119901095 | A                  | 33 | 55 | C      | 0.0005652  |
| rs10892517   | 11 | 119902255 | T                  | 33 | 54 | C      | 0.0009764  |
| rs11605919   | 11 | 119902691 | C                  | 33 | 55 | T      | 0.0005652  |

|              |                    |    |       |           |
|--------------|--------------------|----|-------|-----------|
| rs11217646   | 11 119903119 G     | 33 | 56 A  | 0.0003196 |
| rs1787023    | 11 119903704 T     | 22 | 45 C  | 0.0002011 |
| rs11217650   | 11 119905180 T     | 39 | 16 G  | 0.0006105 |
| rs1530919    | 11 119905908 A     | 18 | 40 G  | 0.0002349 |
| rs12420530   | 11 119907605 T     | 18 | 40 G  | 0.0002349 |
| rs11217652   | 11 119909306 C     | 18 | 40 G  | 0.0002349 |
| rs5795211    | 11 119910438 T     | 18 | 40 TC | 0.0002349 |
| rs2084893    | 11 119914182 G     | 18 | 40 C  | 0.0002349 |
| rs1597866    | 11 119914915 G     | 18 | 40 A  | 0.0002349 |
| rs2100357    | 11 119915395 T     | 18 | 40 C  | 0.0002349 |
| rs2084892    | 11 119915651 A     | 18 | 40 G  | 0.0002349 |
| rs2887378    | 11 119916226 A     | 18 | 40 G  | 0.0002349 |
| rs11217656   | 11 119918703 A     | 18 | 40 G  | 0.0002349 |
| rs11217660   | 11 119920139 A     | 18 | 40 G  | 0.0002349 |
| rs12421541   | 11 119922558 T     | 18 | 40 A  | 0.0002349 |
| rs666640     | 11 119923259 T     | 18 | 40 A  | 0.0002349 |
| rs1001973    | 11 119923643 A     | 18 | 40 G  | 0.0002349 |
| rs664845     | 11 119923652 A     | 18 | 40 G  | 0.0002349 |
| rs628861     | 11 119925575 A     | 18 | 40 C  | 0.0002349 |
| rs4938762    | 11 119927043 T     | 18 | 40 C  | 0.0002349 |
| rs11217663   | 11 119927491 C     | 18 | 40 T  | 0.0002349 |
| rs1545509    | 11 119927888 A     | 18 | 40 G  | 0.0002349 |
| rs10444336   | 11 119928883 A     | 19 | 40 C  | 0.0004646 |
| rs10444337   | 11 119929276 A     | 19 | 41 G  | 0.0002649 |
| rs10444338   | 11 119929445 C     | 19 | 40 T  | 0.0004646 |
| rs56937356   | 11 119932050 T     | 18 | 39 C  | 0.0004141 |
| rs78722037   | 11 122920668 T     | 23 | 6 A   | 0.0009874 |
| rs4265607    | 11 124108041 T     | 51 | 28 C  | 0.0007148 |
| rs11607806   | 11 124116657 T     | 48 | 25 G  | 0.0008213 |
| rs4935875    | 11 124130019 C     | 42 | 19 G  | 0.0008809 |
| rs35020430   | 11 124166986 T     | 39 | 16 TA | 0.0003359 |
| rs34845439   | 11 124212130 TTG   | 44 | 18 T  | 0.0002616 |
| 11:124230151 | 11 124230151 AAGGG | 39 | 16 A  | 0.0006105 |
| rs3901494    | 11 124235672 C     | 43 | 20 T  | 0.0009741 |
| rs10893290   | 11 124704994 T     | 40 | 17 C  | 0.0006981 |
| rs10893292   | 11 124705936 A     | 40 | 17 T  | 0.0006981 |
| rs11220588   | 11 126586008 T     | 2  | 15 G  | 0.0006243 |
| rs4581457    | 11 126586154 A     | 2  | 15 G  | 0.0006243 |
| rs4499015    | 11 126586335 G     | 2  | 15 A  | 0.0006243 |
| rs4099578    | 11 126597139 T     | 4  | 19 C  | 0.0005969 |



|             |    |           |     |    |    |                      |            |
|-------------|----|-----------|-----|----|----|----------------------|------------|
| rs73024493  | 11 | 127709073 | A   | 18 | 3  | G                    | 0.0008121  |
| rs73024494  | 11 | 127709327 | T   | 19 | 3  | G                    | 0.0004265  |
| rs79219070  | 11 | 130642010 | A   | 12 | 0  | ATG                  | 0.0003422  |
| rs4128590   | 11 | 131224448 | C   | 22 | 5  | T                    | 0.0006676  |
| rs12303649  | 12 | 5998330   | C   | 25 | 7  | G                    | 0.0008092  |
| rs11609265  | 12 | 6023222   | C   | 19 | 41 | T                    | 0.0002649  |
| rs205543    | 12 | 11844691  | A   | 30 | 54 | G                    | 0.0001708  |
| rs2710304   | 12 | 11957231  | T   | 41 | 18 | C                    | 0.0007885  |
| rs111648492 | 12 | 12828685  | C   | 1  | 13 | T                    | 0.0005059  |
| rs74475305  | 12 | 12839118  | C   | 1  | 13 | T                    | 0.0005059  |
| rs11610142  | 12 | 12845381  | C   | 1  | 13 | G                    | 0.0005059  |
| rs17820421  | 12 | 12847990  | G   | 1  | 13 | A                    | 0.0005059  |
| rs17758597  | 12 | 12849241  | G   | 1  | 13 | A                    | 0.0005059  |
| rs138550114 | 12 | 12869553  | TG  | 1  | 14 | T                    | 0.0002433  |
| rs60120298  | 12 | 16155276  | A   | 32 | 11 | AC                   | 0.0004661  |
| rs55850346  | 12 | 16155283  | A   | 32 | 11 | G                    | 0.0004661  |
| rs1913823   | 12 | 20885641  | T   | 29 | 50 | C                    | 0.0009027  |
| rs11046890  | 12 | 23479654  | G   | 2  | 15 | A                    | 0.0006952  |
| rs17408900  | 12 | 24277459  | C   | 6  | 22 | T                    | 0.0007921  |
| rs1039228   | 12 | 24285197  | C   | 6  | 22 | G                    | 0.0007921  |
| rs11047323  | 12 | 24384154  | G   | 16 | 36 | A                    | 0.0005556  |
| rs113537256 | 12 | 29752901  | A   | 1  | 14 | ATG                  | 0.0002716  |
| 12:29752905 | 12 | 29752905  | A   | 1  | 14 | G                    | 0.0002716  |
| rs1402360   | 12 | 43276559  | T   | 5  | 26 | G                    | 0.00001845 |
| rs12721373  | 12 | 48275007  | A   | 5  | 20 | T                    | 0.0009659  |
| 12:57058121 | 12 | 57058121  | ACG | 3  | 17 | A                    | 0.0006426  |
| 12:57058148 | 12 | 57058148  | C   | 3  | 17 | T                    | 0.0006426  |
| rs117120119 | 12 | 57237463  | G   | 12 | 0  | C                    | 0.0003422  |
| rs199578813 | 12 | 58091715  | A   | 1  | 13 | C                    | 0.0005059  |
| rs1515907   | 12 | 59557898  | A   | 33 | 12 | G                    | 0.0005855  |
| rs10877236  | 12 | 59585251  | A   | 33 | 12 | G                    | 0.0005855  |
| rs6581238   | 12 | 59586950  | G   | 33 | 12 | T                    | 0.0005855  |
| rs35877988  | 12 | 59591495  | C   | 33 | 12 | G                    | 0.0005855  |
| rs10877241  | 12 | 59599105  | G   | 33 | 12 | T                    | 0.0005855  |
| rs10877843  | 12 | 62823200  | T   | 50 | 25 | A                    | 0.000499   |
| rs6581895   | 12 | 69842643  | C   | 32 | 10 | T                    | 0.0002023  |
| rs35773387  | 12 | 70780867  | AT  | 6  | 22 | A                    | 0.0007921  |
| rs10784841  | 12 | 70783297  | A   | 6  | 23 | G                    | 0.000429   |
| 12:73570125 | 12 | 73570125  | C   | 0  | 13 | CACACACACACACACACACA | 0.00005596 |
| rs12316906  | 12 | 77266718  | C   | 2  | 15 | G                    | 0.0006243  |

|             |    |          |   |    |    |       |           |
|-------------|----|----------|---|----|----|-------|-----------|
| rs10862707  | 12 | 77270548 | A | 2  | 15 | C     | 0.0006243 |
| rs12321227  | 12 | 77271020 | T | 2  | 15 | C     | 0.0006243 |
| rs146922274 | 12 | 77467304 | T | 1  | 13 | TTTTA | 0.0005059 |
| rs61932809  | 12 | 77468993 | T | 1  | 13 | C     | 0.0005059 |
| rs61930667  | 12 | 77472384 | A | 1  | 13 | T     | 0.0005059 |
| rs61930670  | 12 | 77475922 | G | 1  | 13 | A     | 0.0005059 |
| rs61930671  | 12 | 77478571 | T | 1  | 13 | C     | 0.0005059 |
| rs11610700  | 12 | 77482684 | A | 1  | 14 | C     | 0.0002433 |
| rs310821    | 12 | 77491230 | C | 24 | 45 | T     | 0.0007128 |
| rs310820    | 12 | 77491399 | T | 24 | 45 | A     | 0.0007128 |
| rs310819    | 12 | 77492074 | A | 24 | 45 | G     | 0.0007128 |
| rs310818    | 12 | 77492770 | G | 24 | 45 | T     | 0.0007128 |
| rs310816    | 12 | 77493555 | A | 24 | 45 | G     | 0.0007128 |
| rs310815    | 12 | 77493588 | A | 24 | 45 | G     | 0.0007128 |
| rs10863092  | 12 | 77494328 | T | 24 | 45 | C     | 0.0007128 |
| rs76566838  | 12 | 77495670 | A | 1  | 13 | AGCC  | 0.0005059 |
| rs61930294  | 12 | 77496073 | A | 1  | 13 | G     | 0.0005059 |
| rs11614473  | 12 | 77496878 | A | 1  | 12 | G     | 0.0008359 |
| rs74633707  | 12 | 77499208 | A | 1  | 13 | G     | 0.0005059 |
| rs56149569  | 12 | 77500698 | C | 1  | 13 | T     | 0.0005059 |
| rs9971921   | 12 | 77501316 | T | 1  | 13 | C     | 0.0005059 |
| rs61930296  | 12 | 77502598 | A | 1  | 13 | G     | 0.0005059 |
| rs78152080  | 12 | 77503218 | T | 1  | 13 | C     | 0.0005059 |
| rs75366818  | 12 | 77503221 | C | 1  | 13 | T     | 0.0005059 |
| rs59223587  | 12 | 77503897 | T | 1  | 13 | C     | 0.0005059 |
| rs61930298  | 12 | 77504676 | G | 1  | 13 | A     | 0.0005059 |
| rs10506730  | 12 | 77508673 | G | 1  | 13 | A     | 0.0005059 |
| rs10506731  | 12 | 77509089 | G | 1  | 13 | A     | 0.0005059 |
| rs11610352  | 12 | 77510711 | G | 1  | 13 | A     | 0.0005059 |
| rs7487338   | 12 | 77520190 | G | 0  | 10 | A     | 0.0004472 |
| rs12370635  | 12 | 84468344 | G | 11 | 0  | A     | 0.0007274 |
| rs10858653  | 12 | 88253135 | G | 8  | 25 | C     | 0.000871  |
| rs930975    | 12 | 88257983 | G | 8  | 25 | A     | 0.000871  |
| rs1461288   | 12 | 88261010 | G | 8  | 25 | A     | 0.000871  |
| rs7296180   | 12 | 88262227 | C | 8  | 25 | A     | 0.000871  |
| rs990398    | 12 | 88264362 | T | 8  | 25 | G     | 0.000871  |
| rs1461289   | 12 | 88268444 | C | 8  | 25 | T     | 0.000871  |
| rs10777073  | 12 | 88268569 | T | 8  | 25 | C     | 0.000871  |
| rs10777074  | 12 | 88269137 | A | 8  | 25 | G     | 0.000871  |
| rs10745453  | 12 | 88269390 | G | 8  | 25 | A     | 0.000871  |

|             |    |          |       |   |    |       |           |
|-------------|----|----------|-------|---|----|-------|-----------|
| rs10745454  | 12 | 88269432 | T     | 8 | 25 | G     | 0.000871  |
| rs7398418   | 12 | 88269783 | G     | 8 | 25 | A     | 0.000871  |
| rs7397529   | 12 | 88269866 | T     | 8 | 25 | G     | 0.000871  |
| rs141370509 | 12 | 88270347 | C     | 8 | 25 | CA    | 0.000871  |
| rs11104654  | 12 | 88270856 | T     | 8 | 25 | C     | 0.000871  |
| rs10858655  | 12 | 88273017 | G     | 8 | 25 | A     | 0.000871  |
| rs150428505 | 12 | 88273400 | GAATA | 8 | 25 | G     | 0.000871  |
| rs34611513  | 12 | 88273554 | CT    | 8 | 25 | C     | 0.000871  |
| rs7307395   | 12 | 88277170 | A     | 8 | 25 | G     | 0.000871  |
| rs7307899   | 12 | 88277528 | A     | 8 | 25 | G     | 0.000871  |
| rs150532796 | 12 | 88277990 | GAATT | 8 | 25 | G     | 0.000871  |
| rs10858657  | 12 | 88278061 | T     | 8 | 25 | C     | 0.000871  |
| rs6538117   | 12 | 88280181 | C     | 8 | 25 | G     | 0.000871  |
| rs10777075  | 12 | 88282202 | C     | 7 | 24 | T     | 0.0005769 |
| rs9705744   | 12 | 88282495 | G     | 8 | 25 | C     | 0.000871  |
| rs7979676   | 12 | 88284484 | G     | 8 | 25 | C     | 0.000871  |
| rs11410172  | 12 | 88285087 | T     | 8 | 26 | TA    | 0.0004835 |
| rs2061594   | 12 | 88285434 | G     | 8 | 25 | A     | 0.000871  |
| rs7309469   | 12 | 88286425 | T     | 8 | 25 | C     | 0.000871  |
| rs6538120   | 12 | 88287952 | T     | 8 | 25 | C     | 0.000871  |
| rs1964534   | 12 | 88290182 | G     | 8 | 25 | C     | 0.000871  |
| rs1963507   | 12 | 88290353 | C     | 8 | 25 | T     | 0.000871  |
| rs10777076  | 12 | 88291567 | C     | 8 | 25 | T     | 0.000871  |
| rs11104657  | 12 | 88291872 | T     | 8 | 25 | C     | 0.000871  |
| rs2199360   | 12 | 88292123 | A     | 8 | 25 | G     | 0.000871  |
| rs5799842   | 12 | 88292262 | TA    | 8 | 25 | T     | 0.000871  |
| rs1381144   | 12 | 88293518 | G     | 8 | 25 | A     | 0.000871  |
| rs10745456  | 12 | 88294144 | T     | 8 | 25 | C     | 0.000871  |
| rs60368479  | 12 | 88294154 | T     | 8 | 25 | TCCC  | 0.000871  |
| rs4393402   | 12 | 88295289 | T     | 8 | 25 | G     | 0.000871  |
| rs4842583   | 12 | 88296249 | T     | 8 | 26 | A     | 0.0004835 |
| rs1461295   | 12 | 88296431 | G     | 8 | 26 | A     | 0.0004835 |
| rs3990711   | 12 | 88297044 | G     | 8 | 26 | GAAAT | 0.0004835 |
| rs1471310   | 12 | 88297553 | T     | 8 | 26 | C     | 0.0004835 |
| rs2169320   | 12 | 88298289 | T     | 8 | 26 | C     | 0.0004835 |
| rs1947691   | 12 | 88298411 | T     | 8 | 26 | C     | 0.0004835 |
| rs4842584   | 12 | 88298828 | G     | 8 | 26 | A     | 0.0004835 |
| rs7303524   | 12 | 88299317 | A     | 8 | 26 | G     | 0.0004835 |
| rs1903448   | 12 | 88300103 | A     | 8 | 26 | G     | 0.0004835 |
| rs4482112   | 12 | 88300393 | A     | 8 | 26 | G     | 0.0004835 |

|            |    |          |    |   |    |         |           |
|------------|----|----------|----|---|----|---------|-----------|
| rs2100815  | 12 | 88302045 | T  | 8 | 26 | G       | 0.0004835 |
| rs2085867  | 12 | 88302244 | A  | 8 | 26 | G       | 0.0004835 |
| rs12304843 | 12 | 88303453 | T  | 8 | 26 | C       | 0.0004835 |
| rs4842587  | 12 | 88305128 | A  | 8 | 26 | G       | 0.0004835 |
| rs7302509  | 12 | 88305874 | A  | 8 | 26 | G       | 0.0004835 |
| rs7303385  | 12 | 88306216 | G  | 8 | 26 | T       | 0.0004835 |
| rs11104664 | 12 | 88306519 | G  | 8 | 26 | A       | 0.0004835 |
| rs11610485 | 12 | 88306600 | G  | 8 | 26 | T       | 0.0004835 |
| rs11610898 | 12 | 88306816 | C  | 8 | 26 | T       | 0.0004835 |
| rs11104665 | 12 | 88307756 | G  | 8 | 26 | A       | 0.0004835 |
| rs11104666 | 12 | 88307820 | T  | 8 | 26 | C       | 0.0004835 |
| rs11104667 | 12 | 88308240 | T  | 8 | 26 | A       | 0.0004835 |
| rs10858662 | 12 | 88308413 | T  | 8 | 26 | C       | 0.0004835 |
| rs1824556  | 12 | 88309252 | G  | 8 | 26 | A       | 0.0004835 |
| rs1824557  | 12 | 88309371 | T  | 8 | 26 | C       | 0.0004835 |
| rs1824558  | 12 | 88309378 | A  | 8 | 26 | G       | 0.0004835 |
| rs2045696  | 12 | 88309771 | G  | 8 | 26 | A       | 0.0004835 |
| rs10858663 | 12 | 88310520 | C  | 8 | 26 | A       | 0.0004835 |
| rs7966738  | 12 | 88310899 | G  | 8 | 26 | A       | 0.0004835 |
| rs7966828  | 12 | 88310944 | G  | 8 | 26 | T       | 0.0004835 |
| rs7966894  | 12 | 88311235 | A  | 8 | 26 | G       | 0.0004835 |
| rs10858664 | 12 | 88311434 | C  | 8 | 26 | T       | 0.0004835 |
| rs1461291  | 12 | 88312284 | A  | 8 | 26 | T       | 0.0004835 |
| rs5799843  | 12 | 88313577 | TA | 8 | 27 | T       | 0.0002641 |
| rs4842589  | 12 | 88314167 | C  | 5 | 20 | T       | 0.0009659 |
| rs10623160 | 12 | 88314247 | C  | 5 | 20 | CCT     | 0.0009659 |
| rs1461292  | 12 | 88314884 | A  | 5 | 20 | G       | 0.0009659 |
| rs1461293  | 12 | 88314943 | A  | 5 | 20 | G       | 0.0009659 |
| rs7954853  | 12 | 88315135 | G  | 5 | 20 | A       | 0.0009659 |
| rs4558240  | 12 | 88315366 | C  | 5 | 20 | T       | 0.0009659 |
| rs4257059  | 12 | 88317005 | A  | 5 | 20 | C       | 0.0009659 |
| rs7304833  | 12 | 88318783 | T  | 5 | 20 | C       | 0.0009659 |
| rs4842590  | 12 | 88319381 | A  | 5 | 20 | G       | 0.0009659 |
| rs4842591  | 12 | 88319474 | A  | 5 | 20 | G       | 0.0009659 |
| rs4842592  | 12 | 88319723 | G  | 5 | 20 | A       | 0.0009659 |
| rs10858666 | 12 | 88321186 | T  | 5 | 20 | G       | 0.0009659 |
| rs71082414 | 12 | 88321425 | C  | 5 | 20 | CACATGG | 0.0009659 |
| rs11104674 | 12 | 88321574 | G  | 5 | 20 | A       | 0.0009659 |
| rs4385971  | 12 | 88322247 | C  | 5 | 20 | T       | 0.0009659 |
| rs11402841 | 12 | 88323117 | A  | 5 | 20 | AT      | 0.0009659 |

|              |    |           |              |    |    |                         |            |
|--------------|----|-----------|--------------|----|----|-------------------------|------------|
| rs11104676   | 12 | 88323588  | C            | 5  | 20 | A                       | 0.0009659  |
| rs10858667   | 12 | 88324226  | A            | 5  | 20 | G                       | 0.0009659  |
| rs79150298   | 12 | 90433721  | A            | 0  | 10 | G                       | 0.0005917  |
| 12:90989945  | 12 | 90989945  | T            | 18 | 37 | TATACACACATATATACACGTA` | 0.0005937  |
| rs10777701   | 12 | 95935574  | T            | 39 | 16 | C                       | 0.0006105  |
| rs60149422   | 12 | 95936869  | A            | 35 | 13 | AAAAAAAG                | 0.0005883  |
| rs11445609   | 12 | 96242184  | C            | 55 | 29 | CT                      | 0.000347   |
| 12:105526569 | 12 | 105526569 | A            | 50 | 24 | T                       | 0.0002688  |
| rs657710     | 12 | 118169666 | A            | 45 | 20 | C                       | 0.000305   |
| rs375510578  | 12 | 118604654 | T            | 20 | 4  | C                       | 0.0007606  |
| rs3916065    | 12 | 120934624 | C            | 16 | 37 | A                       | 0.0009189  |
| rs11058858   | 12 | 127393386 | T            | 1  | 13 | C                       | 0.0005059  |
| rs57870255   | 12 | 129001148 | G            | 20 | 40 | A                       | 0.0008835  |
| rs78957821   | 12 | 130092534 | T            | 14 | 1  | C                       | 0.0006347  |
| rs73148954   | 12 | 130694644 | C            | 6  | 22 | T                       | 0.0007921  |
| rs61943885   | 12 | 132680369 | A            | 0  | 10 | G                       | 0.0005917  |
| rs28693604   | 12 | 132866526 | A            | 6  | 22 | G                       | 0.0007921  |
| rs9552087    | 13 | 20710492  | T            | 27 | 8  | A                       | 0.0006326  |
| rs9508336    | 13 | 29863014  | G            | 14 | 37 | C                       | 0.00006864 |
| rs7319242    | 13 | 29863365  | T            | 14 | 36 | C                       | 0.0001265  |
| rs4769709    | 13 | 29865808  | A            | 20 | 40 | G                       | 0.0008835  |
| rs11365604   | 13 | 29865972  | C            | 14 | 36 | CA                      | 0.0001265  |
| rs1926468    | 13 | 36453053  | T            | 34 | 55 | A                       | 0.0009818  |
| rs4941822    | 13 | 36453613  | A            | 34 | 55 | C                       | 0.0009818  |
| rs4943350    | 13 | 36453860  | T            | 34 | 55 | C                       | 0.0009818  |
| rs2051090    | 13 | 36454193  | A            | 34 | 55 | G                       | 0.0009818  |
| rs1936002    | 13 | 36456084  | T            | 34 | 55 | C                       | 0.0009818  |
| rs9545602    | 13 | 36456503  | C            | 34 | 55 | T                       | 0.0009818  |
| rs6563206    | 13 | 36457734  | T            | 35 | 56 | C                       | 0.0006468  |
| 13:39286788  | 13 | 39286788  | C            | 44 | 20 | CA                      | 0.0005739  |
| 13:39286789  | 13 | 39286789  | C            | 44 | 20 | A                       | 0.0005739  |
| 13:39286790  | 13 | 39286790  | C            | 44 | 20 | CACA                    | 0.0009594  |
| rs7327319    | 13 | 40928617  | A            | 11 | 30 | C                       | 0.0006171  |
| rs12867977   | 13 | 40930824  | C            | 8  | 27 | G                       | 0.0002641  |
| rs9526773    | 13 | 52080679  | A            | 26 | 50 | G                       | 0.0001475  |
| rs9568615    | 13 | 52080884  | A            | 22 | 43 | C                       | 0.0006167  |
| rs11617426   | 13 | 52081231  | G            | 24 | 46 | C                       | 0.0004131  |
| rs9646005    | 13 | 52081846  | T            | 24 | 46 | C                       | 0.0004131  |
| 13:52085316  | 13 | 52085316  | AGGATTGACTTG | 16 | 35 | A                       | 0.0004279  |
| rs142218030  | 13 | 52086144  | G            | 25 | 46 | A                       | 0.0007575  |

|             |    |          |    |    |    |                       |           |
|-------------|----|----------|----|----|----|-----------------------|-----------|
| rs148731067 | 13 | 52086145 | C  | 23 | 46 | T                     | 0.0002182 |
| rs9535704   | 13 | 52087589 | G  | 25 | 46 | A                     | 0.0007575 |
| rs144821576 | 13 | 52088239 | AC | 25 | 46 | A                     | 0.0007575 |
| rs11619681  | 13 | 52088867 | C  | 25 | 46 | G                     | 0.0007575 |
| rs12866822  | 13 | 52089286 | G  | 25 | 46 | A                     | 0.0007575 |
| rs11617690  | 13 | 52089453 | G  | 25 | 46 | A                     | 0.0007575 |
| rs11617721  | 13 | 52089629 | G  | 25 | 46 | A                     | 0.0007575 |
| rs11619951  | 13 | 52089631 | A  | 25 | 46 | G                     | 0.0007575 |
| rs12861627  | 13 | 52090275 | A  | 23 | 46 | G                     | 0.0002182 |
| rs4943004   | 13 | 52090864 | T  | 25 | 46 | A                     | 0.0007575 |
| rs11616977  | 13 | 52092247 | C  | 25 | 46 | A                     | 0.0007575 |
| rs1537465   | 13 | 52093119 | C  | 25 | 46 | T                     | 0.0007575 |
| rs1537464   | 13 | 52093574 | T  | 25 | 46 | G                     | 0.0007575 |
| rs9535706   | 13 | 52094811 | C  | 25 | 46 | T                     | 0.0007575 |
| rs12875314  | 13 | 52096145 | G  | 23 | 46 | A                     | 0.0002182 |
| rs9535708   | 13 | 52097246 | A  | 25 | 46 | G                     | 0.0007575 |
| rs9535709   | 13 | 52097842 | A  | 25 | 46 | T                     | 0.0007575 |
| rs9526776   | 13 | 52097905 | T  | 23 | 46 | A                     | 0.0002182 |
| rs9526777   | 13 | 52097959 | T  | 25 | 46 | G                     | 0.0007575 |
| rs12867577  | 13 | 52098171 | T  | 25 | 46 | A                     | 0.0007575 |
| rs9563838   | 13 | 61307706 | A  | 18 | 3  | G                     | 0.0008121 |
| rs35122353  | 13 | 63405760 | A  | 17 | 36 | T                     | 0.0009486 |
| rs1913223   | 13 | 65370523 | A  | 14 | 1  | T                     | 0.0006347 |
| rs9592365   | 13 | 65381616 | A  | 14 | 1  | G                     | 0.0006347 |
| rs9592366   | 13 | 65382906 | A  | 14 | 1  | G                     | 0.0006347 |
| rs117707305 | 13 | 65383451 | T  | 14 | 1  | C                     | 0.0006347 |
| rs9592367   | 13 | 65386113 | A  | 16 | 1  | G                     | 0.0001529 |
| rs73200478  | 13 | 65387678 | T  | 16 | 1  | C                     | 0.0001529 |
| rs73200481  | 13 | 65390377 | A  | 16 | 1  | G                     | 0.0001529 |
| 13:65397340 | 13 | 65397340 | A  | 22 | 44 | C                     | 0.0003557 |
| rs150865846 | 13 | 65400548 | A  | 16 | 1  | ATTT                  | 0.0001529 |
| rs139827942 | 13 | 65402941 | A  | 16 | 2  | AACTTCCAGAGAAAGGAACAG | 0.0007845 |
| rs9598840   | 13 | 65406636 | G  | 16 | 1  | C                     | 0.0001529 |
| rs12429888  | 13 | 65413569 | T  | 16 | 1  | C                     | 0.0001529 |
| rs12427871  | 13 | 65413611 | G  | 16 | 2  | A                     | 0.0007845 |
| rs67763731  | 13 | 65416328 | A  | 16 | 2  | T                     | 0.0007845 |
| rs9598841   | 13 | 65419872 | T  | 16 | 1  | A                     | 0.0001529 |
| rs11148671  | 13 | 65757407 | T  | 35 | 13 | C                     | 0.0006539 |
| rs9540374   | 13 | 65760500 | C  | 38 | 15 | A                     | 0.0005267 |
| 13:65760773 | 13 | 65760773 | A  | 32 | 10 | T                     | 0.0002023 |

|             |    |          |     |    |    |    |           |
|-------------|----|----------|-----|----|----|----|-----------|
| 13:65760777 | 13 | 65760777 | A   | 27 | 7  | T  | 0.0002412 |
| rs1865141   | 13 | 65773972 | C   | 38 | 14 | G  | 0.0002538 |
| rs1338176   | 13 | 65775294 | G   | 38 | 14 | T  | 0.0002538 |
| rs17068864  | 13 | 65779354 | C   | 35 | 13 | A  | 0.0006539 |
| rs9540377   | 13 | 65783341 | T   | 36 | 13 | A  | 0.0003739 |
| rs9317488   | 13 | 65793993 | G   | 35 | 13 | C  | 0.0006539 |
| rs13378409  | 13 | 65988768 | C   | 35 | 13 | A  | 0.0006539 |
| rs9540413   | 13 | 65992984 | G   | 35 | 13 | A  | 0.0006539 |
| rs9540414   | 13 | 65993460 | C   | 35 | 13 | A  | 0.0006539 |
| rs9540416   | 13 | 65994439 | G   | 35 | 13 | A  | 0.0006539 |
| rs9528918   | 13 | 65996559 | T   | 35 | 13 | C  | 0.0006539 |
| rs9646054   | 13 | 65998265 | G   | 35 | 13 | A  | 0.0006539 |
| rs9528920   | 13 | 65999136 | A   | 35 | 13 | G  | 0.0006539 |
| rs7989370   | 13 | 66001504 | T   | 35 | 13 | C  | 0.0006539 |
| rs9540422   | 13 | 66004398 | T   | 35 | 13 | C  | 0.0006539 |
| rs9598975   | 13 | 66009510 | C   | 35 | 13 | A  | 0.0006539 |
| rs139787440 | 13 | 66012618 | C   | 35 | 13 | G  | 0.0006539 |
| rs141462154 | 13 | 66013483 | G   | 35 | 13 | T  | 0.0006539 |
| rs9598979   | 13 | 66013937 | G   | 35 | 13 | C  | 0.0006539 |
| rs1811951   | 13 | 66015942 | C   | 35 | 13 | T  | 0.0006539 |
| rs1855224   | 13 | 66016192 | A   | 35 | 13 | G  | 0.0006539 |
| rs1855225   | 13 | 66016193 | T   | 35 | 13 | G  | 0.0006539 |
| rs7337746   | 13 | 66016604 | C   | 35 | 12 | T  | 0.0003064 |
| rs4400934   | 13 | 66018238 | C   | 35 | 13 | T  | 0.0006539 |
| rs2151344   | 13 | 66019143 | A   | 35 | 13 | G  | 0.0006539 |
| rs2151345   | 13 | 66019195 | G   | 35 | 13 | T  | 0.0006539 |
| rs9598982   | 13 | 66020667 | T   | 35 | 13 | C  | 0.0006539 |
| rs9598983   | 13 | 66024713 | G   | 35 | 13 | A  | 0.0006539 |
| rs149812567 | 13 | 66026713 | T   | 35 | 13 | TA | 0.0006539 |
| rs12323031  | 13 | 66026770 | A   | 35 | 13 | C  | 0.0006539 |
| rs9540460   | 13 | 66089459 | T   | 16 | 2  | C  | 0.0007845 |
| rs61956686  | 13 | 66523846 | T   | 1  | 13 | C  | 0.0005059 |
| rs17790880  | 13 | 66524097 | T   | 1  | 13 | G  | 0.0005059 |
| rs2874736   | 13 | 66529672 | T   | 1  | 13 | C  | 0.0005059 |
| rs61956687  | 13 | 66536491 | T   | 1  | 13 | C  | 0.0005059 |
| rs61956690  | 13 | 66553951 | T   | 1  | 13 | C  | 0.0005059 |
| rs17790904  | 13 | 66587024 | A   | 1  | 13 | G  | 0.0005059 |
| rs147776445 | 13 | 68282542 | CAT | 12 | 0  | C  | 0.0003422 |
| rs7492037   | 13 | 69418044 | A   | 40 | 15 | G  | 0.0001692 |
| rs75020554  | 13 | 75802814 | A   | 14 | 1  | C  | 0.0006347 |

|             |    |                |    |         |              |
|-------------|----|----------------|----|---------|--------------|
| 13:77819880 | 13 | 77819880 A     | 27 | 48 ACAC | 0.0008377    |
| 13:79012528 | 13 | 79012528 G     | 0  | 18 A    | 0.0000007387 |
| rs9560792   | 13 | 87428272 C     | 41 | 18 T    | 0.0007885    |
| rs9556104   | 13 | 87443582 T     | 41 | 18 C    | 0.0007885    |
| rs11330429  | 13 | 87540259 C     | 55 | 29 CT   | 0.000347     |
| rs969501    | 13 | 87617112 G     | 55 | 30 A    | 0.0006201    |
| 13:87640637 | 13 | 87640637 ATG   | 54 | 28 A    | 0.0003346    |
| rs9561492   | 13 | 87689497 A     | 46 | 21 T    | 0.0003668    |
| rs6492695   | 13 | 87695546 G     | 31 | 52 A    | 0.0009496    |
| rs72636462  | 13 | 87695784 T     | 37 | 15 C    | 0.0009053    |
| rs9524345   | 13 | 87700013 C     | 31 | 52 T    | 0.0009496    |
| rs9524365   | 13 | 87702747 A     | 31 | 52 T    | 0.0009496    |
| rs9524367   | 13 | 87703310 T     | 31 | 52 G    | 0.0009496    |
| rs9516366   | 13 | 87705456 C     | 31 | 52 T    | 0.0009496    |
| rs9556359   | 13 | 87706470 T     | 31 | 52 C    | 0.0009496    |
| rs9524373   | 13 | 87706576 A     | 31 | 52 G    | 0.0009496    |
| rs9516372   | 13 | 87709360 C     | 31 | 52 T    | 0.0009496    |
| rs9516374   | 13 | 87709690 C     | 31 | 52 T    | 0.0009496    |
| rs9524401   | 13 | 87712675 A     | 31 | 52 G    | 0.0009496    |
| rs9561541   | 13 | 87719368 A     | 31 | 52 T    | 0.0009496    |
| rs55848046  | 13 | 87720203 TATC  | 46 | 20 T    | 0.0001008    |
| rs9561544   | 13 | 87720442 G     | 31 | 52 A    | 0.0009496    |
| rs72636467  | 13 | 87721053 G     | 38 | 15 A    | 0.0005267    |
| rs7987894   | 13 | 87722426 G     | 31 | 52 T    | 0.0009496    |
| rs5805422   | 13 | 87723820 TAGAG | 31 | 52 T    | 0.0009496    |
| rs34773214  | 13 | 87724838 TCAA  | 31 | 52 T    | 0.0009496    |
| rs9645930   | 13 | 87726002 C     | 31 | 52 T    | 0.0009496    |
| rs7998755   | 13 | 87736771 A     | 51 | 27 G    | 0.0009437    |
| rs7990672   | 13 | 90838056 G     | 36 | 14 T    | 0.0007756    |
| rs2130837   | 13 | 90838563 C     | 37 | 14 T    | 0.0004475    |
| rs2350305   | 13 | 90842611 G     | 37 | 14 A    | 0.0004475    |
| rs9301657   | 13 | 90850355 C     | 37 | 14 G    | 0.0004475    |
| rs9301658   | 13 | 90850542 T     | 37 | 14 C    | 0.0004475    |
| rs1931138   | 13 | 90852373 G     | 37 | 14 A    | 0.0004475    |
| rs4771811   | 13 | 90853343 T     | 37 | 14 A    | 0.0004475    |
| rs9555986   | 13 | 90857744 G     | 37 | 14 A    | 0.0004475    |
| rs9560574   | 13 | 90858269 G     | 37 | 14 A    | 0.0004475    |
| rs4773558   | 13 | 90859091 A     | 37 | 14 G    | 0.0004475    |
| rs9524205   | 13 | 94423978 T     | 23 | 47 A    | 0.0002094    |
| rs149410208 | 13 | 95074442 TA    | 0  | 11 T    | 0.0002715    |



|              |    |           |                 |    |    |       |             |
|--------------|----|-----------|-----------------|----|----|-------|-------------|
| rs9561826    | 13 | 95926133  | A               | 18 | 3  | G     | 0.0007671   |
| rs945897     | 13 | 98472872  | A               | 31 | 52 | T     | 0.0009496   |
| rs114819883  | 13 | 102257824 | G               | 45 | 17 | C     | 0.00006885  |
| rs9558112    | 13 | 104218933 | T               | 43 | 17 | G     | 0.000129    |
| rs9554971    | 13 | 104220996 | T               | 43 | 17 | A     | 0.000129    |
| rs10665670   | 13 | 104274004 | G               | 21 | 4  | GCTTT | 0.0004069   |
| rs34000346   | 13 | 104274311 | G               | 20 | 4  | GA    | 0.000711    |
| rs9558130    | 13 | 104274429 | T               | 20 | 4  | C     | 0.0007606   |
| rs1984042    | 13 | 104287536 | C               | 23 | 5  | T     | 0.0003619   |
| rs9300844    | 13 | 104290048 | T               | 23 | 5  | C     | 0.0003619   |
| rs7983029    | 13 | 104291040 | G               | 23 | 5  | A     | 0.0003619   |
| rs1331523    | 13 | 104294778 | A               | 23 | 5  | G     | 0.0003619   |
| rs7327778    | 13 | 104295500 | G               | 23 | 5  | A     | 0.0003619   |
| rs7320039    | 13 | 104298034 | T               | 23 | 5  | G     | 0.0003619   |
| rs76704943   | 13 | 104299577 | C               | 23 | 5  | T     | 0.0003619   |
| rs1331515    | 13 | 104299600 | T               | 23 | 5  | A     | 0.0003619   |
| rs5806374    | 13 | 104304551 | TA              | 23 | 5  | T     | 0.0003619   |
| rs3916934    | 13 | 104345535 | C               | 59 | 29 | T     | 0.00003083  |
| rs1274746    | 13 | 104357493 | A               | 57 | 30 | T     | 0.0002015   |
| rs1772557    | 13 | 104365226 | T               | 58 | 30 | C     | 0.0001111   |
| rs61347079   | 13 | 104372780 | G               | 41 | 17 | GT    | 0.0004047   |
| rs12873078   | 13 | 105078867 | G               | 10 | 28 | A     | 0.000853    |
| 13:107735084 | 13 | 107735084 | GT              | 50 | 24 | G     | 0.0002688   |
| 13:107735085 | 13 | 107735085 | T               | 48 | 24 | A     | 0.000451    |
| 13:107735086 | 13 | 107735086 | AGAGTAGAGTAGAGT | 50 | 24 | A     | 0.0002688   |
| rs7997308    | 13 | 108808267 | G               | 25 | 7  | A     | 0.0008092   |
| rs7335064    | 13 | 109731736 | G               | 53 | 26 | T     | 0.0000898   |
| rs995292     | 13 | 110664771 | C               | 7  | 24 | T     | 0.0006277   |
| rs2026160    | 13 | 113792893 | C               | 16 | 37 | A     | 0.0003171   |
| rs9577875    | 13 | 114517865 | T               | 5  | 22 | C     | 0.0006023   |
| 14:19072247  | 14 | 19072247  | A               | 8  | 34 | AT    | 0.000002477 |
| rs2733763    | 14 | 22267491  | T               | 58 | 33 | C     | 0.0009818   |
| rs7156758    | 14 | 22279416  | A               | 49 | 23 | C     | 0.0006904   |
| rs7156201    | 14 | 22279817  | A               | 49 | 25 | G     | 0.00085     |
| rs12897417   | 14 | 22282904  | T               | 49 | 25 | C     | 0.00085     |
| rs7159790    | 14 | 22325185  | T               | 49 | 23 | A     | 0.0004159   |
| rs3742491    | 14 | 24429249  | A               | 23 | 3  | G     | 0.0000286   |
| rs139045649  | 14 | 24432493  | C               | 24 | 4  | G     | 0.00006571  |
| rs138982419  | 14 | 24435308  | A               | 25 | 5  | C     | 0.000102    |
| rs141694248  | 14 | 24436047  | T               | 21 | 4  | C     | 0.0004069   |

|             |    |          |     |    |    |       |            |
|-------------|----|----------|-----|----|----|-------|------------|
| rs184829013 | 14 | 24476128 | G   | 26 | 4  | A     | 0.00003311 |
| rs151035018 | 14 | 24477842 | T   | 26 | 5  | C     | 0.00005306 |
| rs11158499  | 14 | 24479365 | A   | 23 | 5  | G     | 0.0003619  |
| rs11158500  | 14 | 24479370 | C   | 23 | 5  | T     | 0.0003619  |
| rs147865522 | 14 | 24480329 | C   | 23 | 5  | CTCTG | 0.0003619  |
| rs17184682  | 14 | 24793762 | G   | 4  | 19 | T     | 0.0005969  |
| rs67156008  | 14 | 24795231 | CCA | 5  | 20 | C     | 0.0009659  |
| rs11622863  | 14 | 24795258 | C   | 5  | 20 | T     | 0.0009659  |
| rs17256902  | 14 | 24795495 | A   | 5  | 20 | G     | 0.0009659  |
| rs12892993  | 14 | 25185329 | C   | 21 | 43 | T     | 0.0003256  |
| rs6573990   | 14 | 25212506 | T   | 18 | 41 | G     | 0.0001308  |
| rs1461650   | 14 | 25213422 | T   | 18 | 41 | G     | 0.0001308  |
| rs7155532   | 14 | 25236724 | C   | 34 | 55 | T     | 0.0009818  |
| rs10483313  | 14 | 26639686 | T   | 15 | 34 | C     | 0.0008313  |
| rs17568415  | 14 | 26641090 | T   | 15 | 34 | C     | 0.0008313  |
| rs17490061  | 14 | 26643485 | T   | 15 | 34 | A     | 0.0008313  |
| rs11623197  | 14 | 26650521 | G   | 15 | 34 | T     | 0.0008313  |
| rs12437100  | 14 | 26652491 | T   | 15 | 34 | C     | 0.0008313  |
| rs7155767   | 14 | 29475867 | G   | 7  | 24 | A     | 0.0006277  |
| rs147624411 | 14 | 29487583 | T   | 9  | 27 | TAC   | 0.000654   |
| 14:32841982 | 14 | 32841982 | T   | 6  | 25 | G     | 0.0001117  |
| rs61980339  | 14 | 33448386 | C   | 14 | 1  | A     | 0.0006347  |
| rs7159000   | 14 | 33921142 | T   | 24 | 6  | C     | 0.0005592  |
| rs10130494  | 14 | 33922187 | G   | 25 | 6  | A     | 0.0003059  |
| rs8006708   | 14 | 33922883 | G   | 25 | 6  | A     | 0.0003059  |
| rs8012273   | 14 | 33923923 | C   | 25 | 6  | T     | 0.0003059  |
| rs8016805   | 14 | 33924157 | G   | 25 | 6  | A     | 0.0003059  |
| rs8003435   | 14 | 33925348 | T   | 24 | 6  | C     | 0.0005592  |
| rs8022941   | 14 | 33925424 | G   | 24 | 6  | C     | 0.0005592  |
| 14:34374954 | 14 | 34374954 | A   | 8  | 26 | C     | 0.0004835  |
| rs61981198  | 14 | 35220605 | G   | 16 | 35 | A     | 0.000956   |
| rs8005659   | 14 | 35223956 | G   | 20 | 40 | A     | 0.0008835  |
| rs61981200  | 14 | 35227456 | T   | 16 | 35 | C     | 0.000956   |
| rs61981202  | 14 | 35228090 | A   | 16 | 35 | G     | 0.000956   |
| rs2383676   | 14 | 35229647 | A   | 15 | 36 | C     | 0.0004515  |
| rs59678582  | 14 | 35235160 | A   | 20 | 40 | G     | 0.0008835  |
| rs12435859  | 14 | 35242391 | T   | 20 | 40 | C     | 0.0008835  |
| rs7153289   | 14 | 35246534 | T   | 20 | 40 | C     | 0.0008835  |
| rs61981232  | 14 | 35254085 | T   | 16 | 35 | C     | 0.000956   |
| rs113025158 | 14 | 35256623 | T   | 16 | 34 | G     | 0.0008093  |

|             |    |                    |    |       |             |
|-------------|----|--------------------|----|-------|-------------|
| rs35217207  | 14 | 35261589 CA        | 14 | 35 C  | 0.0002137   |
| rs5807801   | 14 | 35343464 A         | 43 | 17 AC | 0.0006933   |
| rs1400745   | 14 | 35355300 A         | 53 | 27 G  | 0.0003204   |
| rs77262868  | 14 | 35524570 C         | 43 | 19 T  | 0.0004795   |
| rs17103005  | 14 | 35539882 T         | 42 | 19 A  | 0.0008809   |
| rs9671773   | 14 | 35542146 A         | 42 | 19 G  | 0.0008809   |
| 14:38510836 | 14 | 38510836 T         | 12 | 0 C   | 0.0003547   |
| rs4899384   | 14 | 71625956 T         | 31 | 54 A  | 0.0003134   |
| rs7151384   | 14 | 71639873 G         | 30 | 10 T  | 0.0006347   |
| rs7150382   | 14 | 71639875 T         | 30 | 10 G  | 0.0006347   |
| rs8019082   | 14 | 71649714 A         | 28 | 9 G   | 0.0008484   |
| rs112830953 | 14 | 77299979 C         | 2  | 15 T  | 0.0006243   |
| rs76970624  | 14 | 77305444 A         | 2  | 15 G  | 0.0006243   |
| rs79735523  | 14 | 77307359 C         | 2  | 15 A  | 0.0006243   |
| 14:77319775 | 14 | 77319775 A         | 0  | 10 T  | 0.0005917   |
| 14:78492143 | 14 | 78492143 TGTGTGTGC | 15 | 35 T  | 0.0004795   |
| 14:89482375 | 14 | 89482375 A         | 2  | 16 T  | 0.0003115   |
| rs1967774   | 14 | 90142951 A         | 30 | 55 G  | 0.0002709   |
| rs732914    | 14 | 90148522 A         | 56 | 31 G  | 0.0006352   |
| rs7158240   | 14 | 90150146 G         | 45 | 21 A  | 0.0006315   |
| rs61998683  | 14 | 90150796 C         | 42 | 19 T  | 0.0008809   |
| rs8006462   | 14 | 90878676 T         | 41 | 17 C  | 0.0004047   |
| rs2098254   | 14 | 90884018 C         | 41 | 18 A  | 0.0007885   |
| rs2896136   | 14 | 90898875 G         | 41 | 18 T  | 0.000443    |
| rs6575136   | 14 | 90899380 C         | 43 | 19 G  | 0.0005165   |
| rs2069963   | 14 | 95052627 T         | 12 | 32 C  | 0.0004387   |
| rs59700946  | 14 | 95093097 C         | 54 | 27 G  | 0.000181    |
| 14:95832714 | 14 | 95832714 AT        | 18 | 0 A   | 0.000003529 |
| 14:95832717 | 14 | 95832717 A         | 15 | 1 T   | 0.0003611   |
| 14:95832729 | 14 | 95832729 C         | 16 | 0 CAT | 0.00001528  |
| rs1892224   | 14 | 98763349 T         | 58 | 29 C  | 0.00005841  |
| rs10138335  | 14 | 98772136 C         | 58 | 29 T  | 0.00005841  |
| rs1807069   | 14 | 98773458 G         | 56 | 30 A  | 0.0001878   |
| rs35404361  | 14 | 98777356 T         | 58 | 31 C  | 0.0002058   |
| rs4365229   | 14 | 98806562 T         | 57 | 30 C  | 0.0002015   |
| rs12892719  | 14 | 101489858 T        | 37 | 14 C  | 0.0004475   |
| rs12586258  | 14 | 101492548 T        | 37 | 13 C  | 0.0002102   |
| rs139798344 | 14 | 102994876 TAATA    | 1  | 13 T  | 0.0005059   |
| rs190885263 | 14 | 103632418 T        | 2  | 15 C  | 0.0006243   |
| rs141671546 | 14 | 104631874 GTC      | 20 | 40 G  | 0.0008835   |

|              |    |           |   |    |    |       |            |
|--------------|----|-----------|---|----|----|-------|------------|
| rs10147900   | 14 | 105092031 | T | 20 | 4  | C     | 0.0006746  |
| 14:106784161 | 14 | 106784161 | T | 22 | 4  | C     | 0.0002148  |
| rs10136477   | 14 | 107165757 | G | 23 | 6  | A     | 0.0009286  |
| rs10148746   | 14 | 107165764 | A | 23 | 6  | T     | 0.0009286  |
| rs149749573  | 15 | 22323899  | T | 31 | 10 | TTTTC | 0.0003124  |
| rs35393720   | 15 | 25529775  | T | 12 | 0  | TA    | 0.0003422  |
| rs74004627   | 15 | 26885776  | G | 2  | 16 | A     | 0.0003115  |
| rs7173713    | 15 | 26886154  | T | 2  | 16 | C     | 0.0003115  |
| rs4438262    | 15 | 27674176  | C | 36 | 14 | T     | 0.0007756  |
| rs3922613    | 15 | 27682831  | C | 36 | 14 | T     | 0.0007756  |
| rs7167756    | 15 | 27709626  | C | 31 | 11 | T     | 0.0008085  |
| rs1258799    | 15 | 33106027  | A | 26 | 47 | C     | 0.0007993  |
| rs1258795    | 15 | 33107305  | A | 25 | 47 | G     | 0.0004398  |
| rs77537015   | 15 | 39355732  | C | 24 | 5  | T     | 0.0001934  |
| rs12148236   | 15 | 39374881  | G | 23 | 5  | A     | 0.0003619  |
| rs72739328   | 15 | 39377572  | A | 23 | 5  | G     | 0.0003619  |
| 15:41438169  | 15 | 41438169  | G | 11 | 0  | A     | 0.0007228  |
| 15:51326289  | 15 | 51326289  | C | 28 | 9  | T     | 0.0008484  |
| 15:51326290  | 15 | 51326290  | A | 28 | 9  | T     | 0.0008484  |
| rs2470149    | 15 | 51612240  | T | 14 | 1  | A     | 0.0006347  |
| rs2445763    | 15 | 51618307  | G | 14 | 1  | A     | 0.0006347  |
| rs2470146    | 15 | 51618369  | G | 14 | 1  | A     | 0.0006347  |
| rs2446404    | 15 | 51618943  | C | 14 | 1  | T     | 0.0006347  |
| rs2470145    | 15 | 51619138  | C | 14 | 1  | T     | 0.0006347  |
| rs17602385   | 15 | 51624730  | C | 14 | 1  | T     | 0.0006347  |
| rs2470169    | 15 | 51625116  | G | 14 | 1  | T     | 0.0006347  |
| rs2470165    | 15 | 51627798  | T | 14 | 1  | A     | 0.0006347  |
| rs2446409    | 15 | 51628101  | A | 14 | 1  | G     | 0.0006347  |
| rs2445764    | 15 | 51633517  | G | 14 | 1  | A     | 0.0006347  |
| rs2445769    | 15 | 51635715  | C | 14 | 1  | T     | 0.0006347  |
| rs2445770    | 15 | 51637158  | A | 14 | 1  | G     | 0.0006347  |
| rs2446425    | 15 | 51639727  | T | 14 | 1  | C     | 0.0006347  |
| rs2446426    | 15 | 51641156  | T | 14 | 1  | C     | 0.0006347  |
| rs2470162    | 15 | 51643567  | G | 14 | 1  | C     | 0.0006347  |
| rs2470161    | 15 | 51644669  | T | 14 | 1  | C     | 0.0006347  |
| rs17525891   | 15 | 52014185  | C | 2  | 19 | T     | 0.00003587 |
| rs113030016  | 15 | 52060798  | A | 2  | 17 | G     | 0.0001345  |
| rs78565107   | 15 | 52068267  | C | 2  | 18 | G     | 0.00007463 |
| rs17526337   | 15 | 52086990  | T | 2  | 19 | A     | 0.00003587 |
| rs112889926  | 15 | 52197576  | T | 3  | 18 | C     | 0.0003291  |

|             |    |          |   |    |    |                       |            |
|-------------|----|----------|---|----|----|-----------------------|------------|
| rs112136884 | 15 | 52225041 | T | 3  | 19 | C                     | 0.0001662  |
| rs9744466   | 15 | 52261571 | A | 3  | 19 | C                     | 0.0001662  |
| rs28367289  | 15 | 57868701 | A | 3  | 18 | G                     | 0.0003291  |
| rs56227417  | 15 | 58500956 | T | 48 | 20 | C                     | 0.00005747 |
| rs4350519   | 15 | 58501146 | C | 47 | 21 | G                     | 0.000209   |
| rs1618701   | 15 | 58501282 | T | 47 | 20 | A                     | 0.0001051  |
| rs1663251   | 15 | 58501481 | G | 50 | 24 | T                     | 0.0002688  |
| rs7180071   | 15 | 58502472 | A | 47 | 20 | G                     | 0.0001051  |
| rs2414551   | 15 | 58503128 | T | 47 | 20 | C                     | 0.0001051  |
| rs1663253   | 15 | 58504678 | C | 47 | 22 | T                     | 0.0004013  |
| rs2017566   | 15 | 58505040 | T | 47 | 21 | C                     | 0.000209   |
| rs1711062   | 15 | 58508790 | G | 46 | 22 | C                     | 0.0006885  |
| rs1663254   | 15 | 58513993 | G | 47 | 22 | A                     | 0.0004013  |
| rs1663255   | 15 | 58514242 | C | 47 | 21 | T                     | 0.000209   |
| rs11631950  | 15 | 58520259 | C | 46 | 22 | T                     | 0.0006885  |
| rs35120591  | 15 | 58814992 | C | 25 | 6  | T                     | 0.0003059  |
| rs36013682  | 15 | 65515981 | G | 49 | 25 | A                     | 0.00085    |
| rs1561890   | 15 | 65539407 | T | 52 | 28 | C                     | 0.0009847  |
| rs8029480   | 15 | 65540299 | T | 52 | 28 | C                     | 0.0009847  |
| rs34711258  | 15 | 65543186 | T | 52 | 28 | C                     | 0.0009847  |
| rs11270085  | 15 | 65543940 | G | 52 | 28 | GGATCCCCAGCAAACTTATGC | 0.0009847  |
| rs4776262   | 15 | 65544293 | A | 52 | 28 | G                     | 0.0009847  |
| rs12906430  | 15 | 65548870 | T | 52 | 28 | C                     | 0.0009847  |
| rs2414879   | 15 | 65549457 | T | 52 | 28 | C                     | 0.0009847  |
| rs1961279   | 15 | 65554740 | A | 52 | 27 | G                     | 0.0005555  |
| rs894494    | 15 | 65556442 | C | 52 | 27 | T                     | 0.0005555  |
| rs10467935  | 15 | 65561077 | T | 52 | 26 | C                     | 0.0003045  |
| rs8023288   | 15 | 65561829 | A | 52 | 27 | C                     | 0.0005555  |
| rs7167901   | 15 | 65562811 | G | 52 | 27 | A                     | 0.0005555  |
| rs1982257   | 15 | 65563649 | C | 52 | 27 | T                     | 0.0005555  |
| rs8032837   | 15 | 65567436 | A | 52 | 26 | C                     | 0.0004998  |
| rs10083573  | 15 | 65569083 | C | 52 | 27 | T                     | 0.0005555  |
| rs62012559  | 15 | 65569302 | C | 52 | 25 | A                     | 0.0002708  |
| rs62014960  | 15 | 65569312 | A | 51 | 25 | C                     | 0.0004733  |
| rs4776679   | 15 | 65569933 | G | 52 | 27 | C                     | 0.0005555  |
| rs4776680   | 15 | 65571977 | G | 52 | 27 | A                     | 0.0005555  |
| rs2899707   | 15 | 65575585 | C | 52 | 27 | G                     | 0.0005555  |
| rs34440719  | 15 | 65577548 | T | 51 | 27 | TCAC                  | 0.0005318  |
| rs1057254   | 15 | 65579033 | A | 51 | 25 | G                     | 0.0004733  |
| rs7171823   | 15 | 65580983 | C | 52 | 27 | T                     | 0.0005555  |

|             |    |           |    |    |    |        |           |
|-------------|----|-----------|----|----|----|--------|-----------|
| rs12595530  | 15 | 65591379  | G  | 25 | 47 | A      | 0.0004398 |
| rs12905996  | 15 | 65592944  | G  | 25 | 47 | A      | 0.0004398 |
| rs34552880  | 15 | 65593344  | C  | 25 | 47 | CA     | 0.0004398 |
| rs12898603  | 15 | 65595522  | G  | 25 | 47 | A      | 0.0004398 |
| rs12898396  | 15 | 65595680  | A  | 25 | 47 | G      | 0.0004398 |
| rs526794    | 15 | 65597138  | G  | 25 | 47 | A      | 0.0004398 |
| rs525725    | 15 | 65597284  | A  | 25 | 47 | G      | 0.0004398 |
| rs9788655   | 15 | 65600948  | G  | 25 | 47 | T      | 0.0004398 |
| rs491426    | 15 | 65618326  | A  | 25 | 47 | G      | 0.0004398 |
| rs12905133  | 15 | 65619042  | C  | 25 | 47 | T      | 0.0004398 |
| rs11071839  | 15 | 65619427  | T  | 25 | 47 | A      | 0.0004398 |
| rs7174072   | 15 | 65620156  | C  | 25 | 48 | T      | 0.0002502 |
| rs11853777  | 15 | 65621138  | G  | 25 | 47 | A      | 0.0004398 |
| rs12907128  | 15 | 65621441  | C  | 25 | 47 | A      | 0.0004398 |
| rs2013609   | 15 | 67253339  | A  | 56 | 30 | C      | 0.0003574 |
| rs444141    | 15 | 67253847  | G  | 56 | 30 | C      | 0.0003574 |
| 15:91179365 | 15 | 91179365  | C  | 16 | 2  | A      | 0.0007845 |
| 15:91179398 | 15 | 91179398  | T  | 19 | 2  | G      | 0.0001015 |
| rs16974971  | 15 | 95806551  | T  | 5  | 20 | C      | 0.0009659 |
| rs12592800  | 15 | 98714007  | G  | 27 | 48 | A      | 0.0008377 |
| rs4998382   | 15 | 99331289  | C  | 27 | 7  | G      | 0.0002206 |
| rs7165207   | 15 | 99619610  | A  | 28 | 9  | G      | 0.0008484 |
| rs8038925   | 15 | 99621043  | A  | 29 | 9  | T      | 0.0004831 |
| rs1509157   | 15 | 99623607  | T  | 29 | 9  | C      | 0.0004831 |
| rs10459737  | 15 | 99626170  | T  | 29 | 9  | C      | 0.0004831 |
| rs1551244   | 15 | 99629260  | A  | 29 | 8  | G      | 0.0001956 |
| rs12900689  | 15 | 1.00E+08  | G  | 7  | 26 | A      | 0.0001002 |
| rs56767751  | 15 | 1.00E+08  | C  | 7  | 24 | CAAAAT | 0.0006277 |
| rs2958996   | 15 | 1.00E+08  | A  | 7  | 24 | G      | 0.0006277 |
| rs5815006   | 15 | 101821061 | CA | 18 | 40 | C      | 0.0006891 |
| rs12902917  | 15 | 101823337 | T  | 20 | 41 | G      | 0.0005156 |
| rs12909636  | 15 | 101824271 | T  | 20 | 40 | C      | 0.0008835 |
| rs12908996  | 15 | 101824624 | A  | 20 | 41 | G      | 0.0005156 |
| rs28415096  | 15 | 101825064 | T  | 20 | 40 | G      | 0.0008835 |
| rs10152335  | 15 | 101828423 | T  | 20 | 41 | C      | 0.0005156 |
| rs10152348  | 15 | 101828572 | T  | 19 | 40 | C      | 0.0004646 |
| rs34314457  | 15 | 101828597 | A  | 19 | 39 | G      | 0.0007998 |
| rs8037809   | 15 | 101830244 | C  | 20 | 40 | T      | 0.0008835 |
| rs12899728  | 15 | 101830812 | C  | 21 | 41 | T      | 0.0009669 |
| rs2402095   | 16 | 1490322   | G  | 7  | 25 | A      | 0.0003419 |

|             |    |            |    |            |           |
|-------------|----|------------|----|------------|-----------|
| 16:6703978  | 16 | 6703978 G  | 0  | 12 A       | 0.0001036 |
| rs2270287   | 16 | 8739110 A  | 20 | 4 G        | 0.0007606 |
| rs72766499  | 16 | 8740900 T  | 23 | 5 C        | 0.0003619 |
| rs2908709   | 16 | 9740239 G  | 21 | 42 A       | 0.0005665 |
| rs72779817  | 16 | 9740421 T  | 8  | 27 C       | 0.0002641 |
| rs17550406  | 16 | 9741343 C  | 8  | 28 T       | 0.000142  |
| rs16965984  | 16 | 9741412 C  | 8  | 28 G       | 0.000142  |
| rs11642363  | 16 | 9742790 G  | 8  | 27 T       | 0.0002641 |
| rs34497568  | 16 | 9742912 A  | 8  | 27 AT      | 0.0002641 |
| rs11647032  | 16 | 9743117 A  | 8  | 27 G       | 0.0002641 |
| rs72779819  | 16 | 9743465 G  | 8  | 27 A       | 0.0002641 |
| rs201756757 | 16 | 13267014 G | 11 | 0 A        | 0.0007274 |
| rs7498905   | 16 | 20694067 A | 5  | 20 G       | 0.0009659 |
| rs876106    | 16 | 20694194 C | 5  | 20 A       | 0.0009659 |
| rs12050994  | 16 | 20697868 T | 5  | 20 G       | 0.0009659 |
| rs11643793  | 16 | 20700016 A | 5  | 20 G       | 0.0009659 |
| rs111601937 | 16 | 20705241 G | 5  | 20 A       | 0.0009659 |
| rs76372699  | 16 | 20706955 G | 5  | 20 A       | 0.0009659 |
| rs11643502  | 16 | 20712538 A | 5  | 20 G       | 0.0009659 |
| rs11644530  | 16 | 20712837 G | 5  | 20 A       | 0.0009659 |
| rs35974780  | 16 | 20714033 C | 5  | 21 T       | 0.0005184 |
| rs11648920  | 16 | 20715718 T | 5  | 20 C       | 0.0009659 |
| rs3848252   | 16 | 20718939 A | 5  | 20 G       | 0.0009659 |
| rs9708736   | 16 | 20719627 G | 5  | 20 A       | 0.0009659 |
| rs35390946  | 16 | 20725086 A | 5  | 20 G       | 0.0009659 |
| rs66496446  | 16 | 20726035 T | 5  | 20 C       | 0.0009659 |
| rs3848254   | 16 | 20728166 T | 5  | 20 C       | 0.0009659 |
| rs11643620  | 16 | 20729699 A | 5  | 20 G       | 0.0009659 |
| rs11645111  | 16 | 20731013 T | 5  | 20 C       | 0.0009659 |
| rs10492808  | 16 | 20732321 T | 5  | 20 C       | 0.0009659 |
| rs10852246  | 16 | 20733134 A | 5  | 20 G       | 0.0009659 |
| rs11649682  | 16 | 20734520 C | 5  | 20 A       | 0.0009659 |
| rs71374831  | 16 | 20735386 A | 5  | 20 G       | 0.0009659 |
| rs35518073  | 16 | 20740257 T | 5  | 20 C       | 0.0009659 |
| rs16970587  | 16 | 20740517 T | 5  | 20 C       | 0.0009659 |
| rs34134130  | 16 | 20742185 G | 5  | 20 T       | 0.0009659 |
| rs764139    | 16 | 20743399 G | 5  | 20 A       | 0.0009659 |
| rs11641333  | 16 | 20744154 C | 5  | 20 T       | 0.0009659 |
| rs71149175  | 16 | 20745431 C | 5  | 20 CAAATAA | 0.0009659 |
| rs67088894  | 16 | 20746239 C | 5  | 20 G       | 0.0009659 |

|             |    |          |   |   |    |    |           |
|-------------|----|----------|---|---|----|----|-----------|
| rs1136268   | 16 | 20747104 | T | 5 | 20 | C  | 0.0009659 |
| rs11074471  | 16 | 20748331 | A | 5 | 20 | C  | 0.0009659 |
| rs34900980  | 16 | 20755650 | A | 5 | 20 | G  | 0.0009659 |
| rs67573009  | 16 | 20755662 | G | 5 | 20 | A  | 0.0009659 |
| rs201528322 | 16 | 20756915 | G | 5 | 20 | A  | 0.0009659 |
| rs35969935  | 16 | 20757590 | C | 5 | 20 | T  | 0.0009659 |
| rs35137814  | 16 | 20758433 | A | 5 | 20 | C  | 0.0009659 |
| rs11642478  | 16 | 20759548 | T | 5 | 20 | C  | 0.0009659 |
| rs12934252  | 16 | 20760423 | C | 5 | 20 | T  | 0.0009659 |
| rs11646463  | 16 | 20761804 | T | 5 | 20 | C  | 0.0009659 |
| rs66885877  | 16 | 20765744 | C | 5 | 20 | T  | 0.0009659 |
| rs34670153  | 16 | 20767741 | A | 5 | 20 | G  | 0.0009659 |
| rs373842582 | 16 | 20768432 | C | 5 | 20 | T  | 0.0009659 |
| rs375051391 | 16 | 20768433 | A | 5 | 20 | G  | 0.0009659 |
| rs368774211 | 16 | 20768763 | G | 4 | 19 | A  | 0.0005969 |
| rs201881632 | 16 | 20768968 | T | 5 | 20 | G  | 0.0009659 |
| rs199852853 | 16 | 20769158 | C | 5 | 20 | T  | 0.0009659 |
| rs35139281  | 16 | 20770247 | T | 5 | 20 | TG | 0.0009659 |
| rs2356267   | 16 | 20771530 | G | 5 | 20 | C  | 0.0009659 |
| rs11643290  | 16 | 20772409 | T | 5 | 20 | C  | 0.0009659 |
| rs34160924  | 16 | 20773108 | G | 5 | 20 | T  | 0.0009659 |
| rs60388194  | 16 | 20773244 | C | 5 | 20 | T  | 0.0009659 |
| rs66647715  | 16 | 20773562 | T | 5 | 20 | C  | 0.0009659 |
| rs11645969  | 16 | 20773764 | A | 5 | 20 | G  | 0.0009659 |
| rs11647477  | 16 | 20774919 | A | 5 | 20 | G  | 0.0009659 |
| rs12232379  | 16 | 20777031 | T | 5 | 20 | C  | 0.0009659 |
| rs11644091  | 16 | 20777932 | T | 5 | 20 | C  | 0.0009659 |
| rs67428664  | 16 | 20779962 | T | 5 | 20 | A  | 0.0009659 |
| rs67410356  | 16 | 20780262 | T | 5 | 20 | C  | 0.0009659 |
| rs71374832  | 16 | 20780386 | T | 5 | 20 | C  | 0.0009659 |
| rs1027457   | 16 | 20781194 | A | 5 | 20 | C  | 0.0009659 |
| rs12919474  | 16 | 20781947 | G | 5 | 20 | T  | 0.0009659 |
| rs35620560  | 16 | 20782373 | A | 5 | 20 | G  | 0.0009659 |
| rs11641265  | 16 | 20783278 | G | 5 | 20 | A  | 0.0009659 |
| rs57941736  | 16 | 20783737 | T | 5 | 20 | TA | 0.0009659 |
| rs11642585  | 16 | 20784016 | C | 5 | 20 | A  | 0.0009659 |
| rs7498567   | 16 | 20785716 | C | 5 | 20 | T  | 0.0009659 |
| rs2071524   | 16 | 20787770 | A | 5 | 20 | G  | 0.0009659 |
| rs2071525   | 16 | 20787945 | G | 5 | 20 | A  | 0.0009659 |
| rs2074541   | 16 | 20789335 | A | 5 | 20 | G  | 0.0009659 |



|             |    |          |        |    |    |        |              |
|-------------|----|----------|--------|----|----|--------|--------------|
| rs11646755  | 16 | 20790095 | T      | 5  | 20 | C      | 0.000897     |
| rs11642081  | 16 | 20790315 | C      | 5  | 20 | T      | 0.0009659    |
| rs71374833  | 16 | 20790688 | G      | 4  | 19 | A      | 0.0006572    |
| rs2074542   | 16 | 20792914 | C      | 5  | 20 | A      | 0.0009659    |
| rs13306604  | 16 | 20793129 | T      | 5  | 20 | A      | 0.0009659    |
| rs35396346  | 16 | 20794499 | T      | 5  | 20 | A      | 0.0009659    |
| rs12932513  | 16 | 20794983 | G      | 5  | 20 | A      | 0.0009659    |
| rs11279671  | 16 | 20804819 | T      | 5  | 20 | TTAAGG | 0.0009659    |
| rs34698709  | 16 | 20850993 | C      | 5  | 20 | T      | 0.0009659    |
| rs34400115  | 16 | 20857698 | A      | 5  | 20 | C      | 0.0009659    |
| rs16970701  | 16 | 20862595 | T      | 5  | 20 | C      | 0.0009659    |
| 16:20886534 | 16 | 20886534 | G      | 36 | 12 | A      | 0.0001705    |
| rs78543395  | 16 | 21022113 | G      | 3  | 18 | A      | 0.0003291    |
| rs16970821  | 16 | 21043801 | C      | 3  | 18 | T      | 0.0003291    |
| rs78030383  | 16 | 21044853 | T      | 3  | 18 | C      | 0.0003291    |
| rs2112494   | 16 | 21045369 | G      | 3  | 18 | A      | 0.0003291    |
| rs78786332  | 16 | 21047284 | A      | 3  | 18 | G      | 0.0003291    |
| rs7187726   | 16 | 21049508 | G      | 3  | 18 | T      | 0.0003291    |
| rs139853718 | 16 | 21063298 | CTATTT | 3  | 18 | C      | 0.0003291    |
| rs74943127  | 16 | 21069038 | C      | 3  | 18 | G      | 0.0003291    |
| rs79740697  | 16 | 21073002 | T      | 3  | 18 | C      | 0.0003291    |
| rs76178045  | 16 | 21074366 | T      | 3  | 18 | C      | 0.0003291    |
| rs76583972  | 16 | 21077904 | T      | 3  | 18 | G      | 0.0003291    |
| rs77578182  | 16 | 21078220 | T      | 3  | 18 | A      | 0.0003291    |
| rs77871434  | 16 | 21080309 | T      | 3  | 18 | G      | 0.0003291    |
| rs75686265  | 16 | 21082163 | T      | 3  | 18 | C      | 0.0003291    |
| rs79945700  | 16 | 21084738 | T      | 3  | 18 | C      | 0.0003291    |
| rs74813399  | 16 | 21084802 | A      | 3  | 18 | G      | 0.0003291    |
| rs78625859  | 16 | 21086487 | C      | 3  | 18 | T      | 0.0003291    |
| rs59311940  | 16 | 21087131 | G      | 3  | 17 | T      | 0.0006426    |
| 16:26745609 | 16 | 26745609 | GTTTT  | 0  | 10 | G      | 0.0006636    |
| rs11150592  | 16 | 30555658 | G      | 25 | 7  | A      | 0.0008092    |
| rs77781754  | 16 | 31790375 | T      | 0  | 10 | A      | 0.0005917    |
| 16:32600808 | 16 | 32600808 | A      | 5  | 23 | T      | 0.0001328    |
| rs8058337   | 16 | 49677354 | T      | 25 | 7  | G      | 0.0008092    |
| rs2540732   | 16 | 49683231 | C      | 31 | 11 | A      | 0.0008085    |
| rs200478485 | 16 | 55832344 | G      | 42 | 18 | A      | 0.0004599    |
| rs201754281 | 16 | 55832348 | G      | 45 | 19 | A      | 0.0001682    |
| rs377102550 | 16 | 55832352 | G      | 42 | 18 | A      | 0.0002532    |
| rs202037976 | 16 | 56161190 | G      | 12 | 46 | A      | 0.0000001377 |

|             |    |             |    |                    |            |
|-------------|----|-------------|----|--------------------|------------|
| rs4783644   | 16 | 66383359 C  | 17 | 2 T                | 0.0004014  |
| rs202191991 | 16 | 69886186 CT | 2  | 16 C               | 0.0007376  |
| rs200106830 | 16 | 72901631 A  | 4  | 19 AAAAAG          | 0.0005458  |
| 16:73093273 | 16 | 73093273 G  | 17 | 2 A                | 0.0003798  |
| rs10871310  | 16 | 73498929 C  | 43 | 20 T               | 0.0009741  |
| rs12597797  | 16 | 73511154 A  | 28 | 9 G                | 0.0008484  |
| rs4888373   | 16 | 73519608 A  | 31 | 10 G               | 0.0003611  |
| rs57762438  | 16 | 73520346 T  | 31 | 10 TG              | 0.0003611  |
| rs8062545   | 16 | 73520460 T  | 31 | 10 C               | 0.0003611  |
| rs8057817   | 16 | 73522400 T  | 32 | 10 G               | 0.0002023  |
| rs4888428   | 16 | 73535986 C  | 31 | 10 A               | 0.0003611  |
| rs4888429   | 16 | 73535987 G  | 31 | 10 T               | 0.0003611  |
| 16:76507762 | 16 | 76507762 T  | 6  | 22 TG              | 0.0007482  |
| rs200278292 | 16 | 76628424 AT | 12 | 0 A                | 0.0003422  |
| rs881083    | 16 | 80652783 C  | 0  | 13 A               | 0.00005596 |
| rs12446955  | 16 | 83903941 A  | 21 | 43 C               | 0.0003256  |
| rs3943925   | 16 | 83906554 A  | 29 | 51 G               | 0.0005253  |
| rs9888805   | 16 | 83907379 T  | 29 | 52 G               | 0.0002991  |
| rs12149164  | 16 | 84451091 A  | 27 | 8 G                | 0.0006326  |
| rs72799546  | 16 | 84860112 C  | 6  | 23 G               | 0.000429   |
| rs9925686   | 16 | 84869448 T  | 0  | 10 G               | 0.0005917  |
| rs370910839 | 16 | 84871165 G  | 0  | 10 GGCGCGTGACACCAC | 0.0005917  |
| rs2087991   | 16 | 84871171 T  | 1  | 13 C               | 0.0005059  |
| rs8047416   | 16 | 84871409 T  | 0  | 10 C               | 0.0005917  |
| rs72799559  | 16 | 84871799 C  | 0  | 10 G               | 0.0005917  |
| rs11640864  | 16 | 85435872 A  | 5  | 20 G               | 0.0009659  |
| rs8054346   | 16 | 86287812 T  | 32 | 55 C               | 0.000146   |
| rs1510204   | 16 | 86293870 A  | 28 | 49 G               | 0.0008723  |
| rs1704480   | 16 | 86294325 A  | 28 | 49 G               | 0.0008723  |
| rs1391228   | 16 | 86294853 A  | 28 | 49 G               | 0.0008723  |
| rs4589560   | 16 | 86925582 T  | 0  | 10 C               | 0.0005917  |
| rs76497033  | 16 | 86926178 T  | 0  | 10 C               | 0.0005917  |
| rs76866247  | 16 | 86926315 T  | 0  | 10 C               | 0.0005917  |
| rs77154859  | 16 | 86926389 C  | 0  | 10 T               | 0.0005917  |
| rs78362076  | 16 | 86926406 T  | 0  | 10 C               | 0.0005917  |
| rs78089027  | 16 | 86926467 A  | 0  | 10 G               | 0.0005917  |
| rs77544811  | 16 | 86926569 G  | 0  | 10 C               | 0.0005917  |
| rs77789822  | 16 | 86926775 G  | 0  | 10 A               | 0.0005917  |
| rs77118693  | 16 | 86926788 A  | 0  | 10 C               | 0.0005917  |
| rs75519305  | 16 | 86926872 C  | 0  | 10 T               | 0.0005917  |

|             |    |          |                  |    |    |   |            |
|-------------|----|----------|------------------|----|----|---|------------|
| rs79553371  | 16 | 86927603 | T                | 0  | 10 | C | 0.0005917  |
| 16:87304715 | 16 | 87304715 | T                | 8  | 29 | C | 0.00003867 |
| rs11076693  | 16 | 88718552 | G                | 13 | 32 | A | 0.0009401  |
| rs11654249  | 17 | 1165320  | A                | 14 | 34 | C | 0.0004075  |
| rs7212120   | 17 | 8922842  | C                | 12 | 33 | A | 0.0002456  |
| rs59696502  | 17 | 9918877  | C                | 11 | 0  | T | 0.0007274  |
| rs62058427  | 17 | 13073591 | G                | 41 | 18 | C | 0.0007885  |
| rs2188891   | 17 | 13087594 | G                | 15 | 34 | A | 0.0008313  |
| rs59192815  | 17 | 13092617 | T                | 13 | 33 | C | 0.0005565  |
| rs56236744  | 17 | 13100067 | C                | 42 | 16 | A | 0.0001106  |
| rs7211590   | 17 | 13139032 | G                | 13 | 32 | A | 0.0009401  |
| rs11078155  | 17 | 13340405 | C                | 5  | 20 | G | 0.0009659  |
| 17:15378614 | 17 | 15378614 | AGAAAAGAAAAGAAAG | 7  | 24 | A | 0.0005947  |
| rs12951975  | 17 | 31906265 | G                | 37 | 14 | A | 0.0007953  |
| rs2189331   | 17 | 32422691 | T                | 32 | 55 | G | 0.0003175  |
| rs4795156   | 17 | 35226986 | C                | 21 | 4  | T | 0.0004069  |
| rs62074890  | 17 | 36774263 | A                | 18 | 3  | G | 0.0008121  |
| rs62074891  | 17 | 36774985 | T                | 18 | 3  | C | 0.0008121  |
| rs62074892  | 17 | 36775006 | T                | 18 | 3  | C | 0.0008121  |
| rs2075052   | 17 | 36776981 | T                | 18 | 3  | G | 0.0008121  |
| rs12450767  | 17 | 36777102 | A                | 18 | 3  | G | 0.0008121  |
| rs12452655  | 17 | 36777205 | T                | 18 | 3  | C | 0.0008121  |
| rs62074896  | 17 | 36786201 | T                | 18 | 3  | A | 0.0008121  |
| rs56955572  | 17 | 36788631 | TA               | 18 | 3  | T | 0.0008121  |
| rs79553746  | 17 | 36789069 | G                | 18 | 3  | T | 0.0008121  |
| rs3848400   | 17 | 36790032 | G                | 18 | 3  | T | 0.0008121  |
| rs3848401   | 17 | 36790097 | T                | 18 | 3  | C | 0.0008121  |
| rs58164585  | 17 | 36791133 | T                | 18 | 3  | C | 0.0008121  |
| rs62074927  | 17 | 36793834 | T                | 18 | 3  | C | 0.0008121  |
| rs7224109   | 17 | 36964899 | C                | 1  | 13 | T | 0.0004979  |
| rs12937167  | 17 | 36996181 | G                | 1  | 14 | A | 0.0002433  |
| rs374270062 | 17 | 38360603 | G                | 12 | 0  | T | 0.0003547  |
| rs112247852 | 17 | 38360604 | G                | 12 | 0  | T | 0.0003547  |
| 17:43122073 | 17 | 43122073 | C                | 11 | 0  | A | 0.0007274  |
| rs3809781   | 17 | 46692573 | A                | 14 | 1  | C | 0.0006677  |
| rs76487714  | 17 | 48611993 | A                | 18 | 3  | G | 0.0008121  |
| rs2306001   | 17 | 48615329 | A                | 20 | 4  | G | 0.0007606  |
| rs111678638 | 17 | 48619272 | A                | 20 | 4  | G | 0.0007606  |
| rs112657244 | 17 | 48619290 | A                | 20 | 4  | G | 0.0007606  |
| rs8066067   | 17 | 49407790 | C                | 13 | 0  | A | 0.00016    |

|             |    |              |    |             |           |
|-------------|----|--------------|----|-------------|-----------|
| 17:52506523 | 17 | 52506523 G   | 16 | 2 GGAAGGAAA | 0.0008338 |
| rs8068233   | 17 | 55450074 A   | 33 | 12 G        | 0.0005855 |
| rs9916654   | 17 | 55452531 A   | 35 | 13 G        | 0.0006539 |
| rs1024821   | 17 | 55607947 A   | 54 | 27 T        | 0.000181  |
| rs1035173   | 17 | 55608091 A   | 54 | 28 G        | 0.0003346 |
| rs62058122  | 17 | 55692602 T   | 1  | 13 C        | 0.0005059 |
| rs12602545  | 17 | 64010195 A   | 29 | 9 G         | 0.0004831 |
| rs72042924  | 17 | 68475663 GA  | 29 | 52 G        | 0.0008265 |
| rs4793394   | 17 | 68509868 A   | 31 | 52 G        | 0.0009496 |
| rs4793395   | 17 | 68509948 C   | 31 | 52 T        | 0.0009496 |
| rs9894256   | 17 | 68511145 A   | 31 | 52 G        | 0.0009496 |
| 17:70053962 | 17 | 70053962 A   | 0  | 10 G        | 0.0005917 |
| rs4793411   | 17 | 70225574 C   | 15 | 35 T        | 0.0004795 |
| rs4793412   | 17 | 70226159 G   | 15 | 35 A        | 0.0004795 |
| rs11654234  | 17 | 72425499 A   | 2  | 15 G        | 0.0006243 |
| rs2670824   | 17 | 72438972 C   | 2  | 16 G        | 0.0003115 |
| rs9893663   | 17 | 72439700 T   | 2  | 16 G        | 0.0003115 |
| rs2706530   | 17 | 72440381 G   | 2  | 16 A        | 0.0003115 |
| rs2706528   | 17 | 72442416 A   | 2  | 15 C        | 0.0006243 |
| rs28604312  | 17 | 76625195 A   | 35 | 12 G        | 0.0003064 |
| rs12952072  | 17 | 80664054 G   | 28 | 9 A         | 0.0008484 |
| rs12945524  | 17 | 80664081 T   | 28 | 9 G         | 0.0008484 |
| rs12943159  | 17 | 80711299 A   | 28 | 9 G         | 0.0008484 |
| rs4986111   | 17 | 80784476 A   | 29 | 8 G         | 0.0001956 |
| rs12937095  | 17 | 80812193 A   | 39 | 16 G        | 0.0006105 |
| rs12945629  | 17 | 80834447 A   | 39 | 16 G        | 0.0006105 |
| rs34424116  | 17 | 80836559 T   | 29 | 8 G         | 0.0001956 |
| 17:80845004 | 17 | 80845004 ACT | 35 | 13 A        | 0.0006539 |
| rs12938554  | 17 | 80849295 T   | 38 | 15 C        | 0.0005267 |
| rs4986129   | 17 | 80853554 A   | 29 | 8 G         | 0.0001956 |
| rs12949628  | 17 | 80874290 G   | 29 | 8 T         | 0.0001956 |
| rs11077949  | 17 | 80896115 T   | 36 | 14 C        | 0.0007756 |
| rs3744156   | 17 | 80897215 T   | 37 | 15 C        | 0.0009053 |
| rs3603      | 17 | 80901002 T   | 37 | 15 C        | 0.0009053 |
| rs11077950  | 17 | 80901750 T   | 37 | 15 C        | 0.0009053 |
| rs12940475  | 17 | 80902411 T   | 37 | 15 G        | 0.0009053 |
| rs7225887   | 17 | 80904844 T   | 37 | 15 C        | 0.0009053 |
| rs11653058  | 17 | 80909694 T   | 34 | 13 C        | 0.0006133 |
| rs35355170  | 17 | 80928674 C   | 38 | 14 G        | 0.0002538 |
| rs645951    | 18 | 8858624 A    | 54 | 29 G        | 0.0006016 |

|             |    |                       |    |          |             |
|-------------|----|-----------------------|----|----------|-------------|
| rs113667478 | 18 | 9582320 TAGGG         | 13 | 33 T     | 0.0005413   |
| rs60500709  | 18 | 9582322 G             | 13 | 33 C     | 0.0005413   |
| 18:12597172 | 18 | 12597172 C            | 34 | 11 CA    | 0.0001411   |
| 18:12597173 | 18 | 12597173 C            | 34 | 11 A     | 0.0001411   |
| rs1787086   | 18 | 35309697 G            | 36 | 8 T      | 0.000001762 |
| 18:35309698 | 18 | 35309698 G            | 26 | 6 A      | 0.0001602   |
| 18:35309700 | 18 | 35309700 CGATCTGTCTAT | 41 | 11 C     | 0.000002663 |
| 18:35309701 | 18 | 35309701 G            | 28 | 9 T      | 0.0007186   |
| 18:35309702 | 18 | 35309702 G            | 23 | 6 A      | 0.0009874   |
| rs1806540   | 18 | 36001799 A            | 29 | 51 G     | 0.0005253   |
| rs10853454  | 18 | 36005986 G            | 24 | 42 A     | 0.0009531   |
| rs2226880   | 18 | 36010239 T            | 27 | 50 G     | 0.0004144   |
| rs2014682   | 18 | 36010297 T            | 31 | 52 C     | 0.0009496   |
| rs5010574   | 18 | 36011213 T            | 28 | 50 A     | 0.0005077   |
| rs11082076  | 18 | 36012486 T            | 31 | 52 C     | 0.0009496   |
| rs11665137  | 18 | 36013023 T            | 25 | 46 C     | 0.0007575   |
| rs62079638  | 18 | 36013337 A            | 25 | 46 C     | 0.0007575   |
| rs17638236  | 18 | 36015382 T            | 25 | 46 C     | 0.0007575   |
| rs8090757   | 18 | 36015879 G            | 25 | 46 A     | 0.0007575   |
| rs8094295   | 18 | 36015953 G            | 25 | 46 A     | 0.0007575   |
| rs201179490 | 18 | 36016105 A            | 25 | 46 AG    | 0.0007575   |
| rs7231316   | 18 | 36017968 T            | 25 | 46 G     | 0.0007575   |
| rs7232682   | 18 | 36018202 G            | 25 | 46 T     | 0.0007575   |
| rs7231411   | 18 | 36018288 C            | 25 | 46 A     | 0.0007575   |
| rs7231559   | 18 | 36018294 A            | 25 | 46 C     | 0.0007575   |
| rs7231875   | 18 | 36018532 G            | 25 | 46 A     | 0.0007575   |
| rs55813611  | 18 | 36018965 T            | 25 | 46 C     | 0.0007575   |
| rs11661114  | 18 | 36019152 C            | 25 | 46 T     | 0.0007575   |
| rs7242958   | 18 | 36019921 C            | 25 | 46 T     | 0.0007575   |
| rs7242071   | 18 | 36019959 A            | 25 | 46 G     | 0.0007575   |
| rs7243119   | 18 | 36020002 C            | 25 | 46 T     | 0.0007575   |
| rs7241992   | 18 | 36020096 T            | 28 | 51 C     | 0.0002892   |
| rs7242327   | 18 | 36020316 T            | 25 | 46 A     | 0.0007575   |
| rs17557806  | 18 | 36020670 T            | 25 | 46 C     | 0.0007575   |
| rs11877851  | 18 | 36020743 C            | 25 | 46 G     | 0.0007575   |
| rs958233    | 18 | 36021110 A            | 25 | 46 C     | 0.0007575   |
| rs62079639  | 18 | 36021456 G            | 25 | 46 A     | 0.0007575   |
| rs72403018  | 18 | 36021461 C            | 25 | 46 CAGTT | 0.0007575   |
| rs62079641  | 18 | 36021750 A            | 25 | 46 G     | 0.0007575   |
| rs62079642  | 18 | 36021915 T            | 25 | 46 G     | 0.0007575   |

|             |    |                  |    |      |            |
|-------------|----|------------------|----|------|------------|
| 18:36309093 | 18 | 36309093 T       | 6  | 22 A | 0.0008352  |
| 18:36709329 | 18 | 36709329 CACACAG | 36 | 11 C | 0.00004408 |
| 18:36709331 | 18 | 36709331 CACAG   | 36 | 11 C | 0.00004408 |
| rs203191    | 18 | 38054299 A       | 33 | 54 G | 0.0009764  |
| rs169395    | 18 | 38054353 G       | 33 | 54 T | 0.0009764  |
| rs55562     | 18 | 38057808 T       | 32 | 52 C | 0.0007911  |
| rs61371567  | 18 | 38058683 AT      | 33 | 54 A | 0.0009764  |
| rs203162    | 18 | 38059386 C       | 33 | 54 T | 0.0009764  |
| rs203172    | 18 | 38068321 T       | 33 | 54 C | 0.0009764  |
| rs4132081   | 18 | 38084525 C       | 33 | 55 T | 0.0005652  |
| rs4291983   | 18 | 38106410 C       | 33 | 55 A | 0.0005652  |
| rs9956350   | 18 | 38107168 G       | 33 | 55 A | 0.0005652  |
| rs7227822   | 18 | 38107825 C       | 33 | 55 G | 0.0005652  |
| rs8091417   | 18 | 38124303 T       | 33 | 55 C | 0.0005652  |
| rs656134    | 18 | 40472219 A       | 20 | 4 G  | 0.0007606  |
| rs472591    | 18 | 40483622 A       | 26 | 7 G  | 0.0004518  |
| rs2945505   | 18 | 47341544 G       | 35 | 56 A | 0.0006468  |
| rs9964783   | 18 | 47365005 A       | 43 | 20 C | 0.0009741  |
| rs640179    | 18 | 47385014 A       | 33 | 54 G | 0.0009764  |
| rs79368720  | 18 | 49343233 T       | 0  | 10 A | 0.0005917  |
| rs5824918   | 18 | 49707139 A       | 24 | 6 AT | 0.0006264  |
| rs17815367  | 18 | 49710900 G       | 24 | 6 A  | 0.0005592  |
| rs4940169   | 18 | 49713609 T       | 24 | 6 C  | 0.0005592  |
| rs4617958   | 18 | 49716105 G       | 24 | 6 A  | 0.0005592  |
| rs57940982  | 18 | 57747471 G       | 16 | 2 A  | 0.0007845  |
| rs11378817  | 18 | 57828305 GT      | 18 | 3 G  | 0.0008121  |
| rs58237489  | 18 | 57838331 T       | 18 | 3 C  | 0.0008121  |
| rs9960729   | 18 | 73090950 C       | 17 | 38 T | 0.0003648  |
| rs372076138 | 18 | 73824652 C       | 29 | 51 G | 0.0005253  |
| rs1660179   | 18 | 77361158 A       | 48 | 22 T | 0.0002295  |
| rs56401549  | 18 | 77771523 AAG     | 58 | 32 A | 0.0005669  |
| rs118096710 | 18 | 77773182 A       | 3  | 18 G | 0.0007476  |
| rs12965486  | 18 | 77773596 A       | 58 | 32 G | 0.0005669  |
| rs4799121   | 18 | 77774886 C       | 58 | 32 A | 0.0005669  |
| rs10853394  | 18 | 77775173 C       | 58 | 31 T | 0.0002058  |
| rs10853395  | 18 | 77775318 C       | 58 | 32 T | 0.0005669  |
| rs11504776  | 18 | 77776386 A       | 58 | 32 T | 0.0005669  |
| rs11504774  | 18 | 77776428 A       | 58 | 32 G | 0.0005669  |
| rs149018972 | 18 | 77777227 C       | 58 | 32 T | 0.0005669  |
| rs200969704 | 18 | 77777636 G       | 58 | 32 T | 0.0005669  |

|             |    |                    |    |                |             |
|-------------|----|--------------------|----|----------------|-------------|
| rs202234556 | 18 | 77777757 T         | 58 | 32 C           | 0.0005669   |
| rs139108329 | 19 | 3023905 C          | 20 | 3 CAAAAGAAAAGA | 0.0002428   |
| rs8107652   | 19 | 7561410 C          | 34 | 55 T           | 0.0009818   |
| rs11879017  | 19 | 11737612 A         | 18 | 39 G           | 0.0004141   |
| rs8106273   | 19 | 11737927 G         | 17 | 39 A           | 0.0002057   |
| rs8105182   | 19 | 11738117 T         | 17 | 40 G           | 0.0001953   |
| rs8108668   | 19 | 11738656 C         | 17 | 39 G           | 0.0002057   |
| rs10419625  | 19 | 11738975 T         | 18 | 38 C           | 0.0007166   |
| rs113072274 | 19 | 11739226 C         | 17 | 39 T           | 0.0002057   |
| rs62111855  | 19 | 11739315 A         | 17 | 39 C           | 0.0002057   |
| rs62111856  | 19 | 11739342 A         | 18 | 38 T           | 0.0007166   |
| rs62111857  | 19 | 11739413 A         | 18 | 39 G           | 0.0004141   |
| rs4804616   | 19 | 11739489 C         | 27 | 49 G           | 0.0004874   |
| rs111772256 | 19 | 11739991 T         | 27 | 49 C           | 0.0004874   |
| rs113810971 | 19 | 11740059 A         | 26 | 50 G           | 0.0001475   |
| rs4052625   | 19 | 11740813 G         | 27 | 49 A           | 0.0004874   |
| rs7250798   | 19 | 11743819 C         | 27 | 50 T           | 0.0002777   |
| rs8109499   | 19 | 11745927 T         | 27 | 50 C           | 0.0002777   |
| rs201159596 | 19 | 11772307 A         | 3  | 23 T           | 0.00001103  |
| rs117861106 | 19 | 13213801 T         | 0  | 10 C           | 0.0006636   |
| rs74340166  | 19 | 15248549 A         | 0  | 10 G           | 0.0005917   |
| 19:17208857 | 19 | 17208857 A         | 11 | 0 C            | 0.000718    |
| rs1859007   | 19 | 19162186 C         | 0  | 16 G           | 0.000005974 |
| 19:27738902 | 19 | 27738902 A         | 0  | 10 G           | 0.0005917   |
| rs8104606   | 19 | 33888460 G         | 41 | 17 A           | 0.0004047   |
| rs8106165   | 19 | 33888588 A         | 41 | 16 G           | 0.0001053   |
| rs2918333   | 19 | 36750539 A         | 0  | 11 G           | 0.0002715   |
| rs78341134  | 19 | 39005848 G         | 0  | 10 A           | 0.0005917   |
| rs11083488  | 19 | 39400495 C         | 24 | 43 T           | 0.0006011   |
| rs72261926  | 19 | 39411650 CACACAGAT | 30 | 52 C           | 0.00054     |
| rs12985428  | 19 | 39414109 A         | 23 | 45 G           | 0.0003849   |
| rs10416055  | 19 | 39435485 G         | 23 | 44 A           | 0.0006657   |
| rs2278412   | 19 | 39437270 G         | 23 | 44 A           | 0.0006657   |
| rs1865047   | 19 | 39437534 T         | 23 | 44 C           | 0.0006657   |
| rs1865049   | 19 | 39437560 A         | 23 | 44 G           | 0.0006657   |
| rs73040938  | 19 | 40287769 T         | 22 | 5 G            | 0.0006676   |
| rs77152874  | 19 | 40288189 T         | 21 | 4 C            | 0.000448    |
| rs73042737  | 19 | 40330433 A         | 20 | 4 C            | 0.0007606   |
| rs200521388 | 19 | 48488329 A         | 0  | 11 AAAAAAAG    | 0.0003046   |
| 19:48492369 | 19 | 48492369 T         | 2  | 22 TA          | 0.000003708 |

|             |    |                   |    |                          |            |
|-------------|----|-------------------|----|--------------------------|------------|
| 19:48492371 | 19 | 48492371 T        | 2  | 22 TTA                   | 0.00001019 |
| rs734570    | 19 | 49606449 T        | 5  | 21 C                     | 0.0005184  |
| 19:55608122 | 19 | 55608122 C        | 17 | 1 CCGCAGTTCACCACCGTCTTCG | 0.00007285 |
| 20:530314   | 20 | 530314 GAAAGAAAT  | 0  | 11 G                     | 0.0002715  |
| 20:2627769  | 20 | 2627769 TATTTATTG | 0  | 10 T                     | 0.0006636  |
| rs6033045   | 20 | 11154329 T        | 35 | 13 C                     | 0.0006539  |
| rs6134147   | 20 | 11154839 C        | 35 | 13 A                     | 0.0006539  |
| rs6040404   | 20 | 11160363 C        | 35 | 13 T                     | 0.0006539  |
| rs2024689   | 20 | 11161752 C        | 35 | 13 T                     | 0.0006539  |
| rs6108856   | 20 | 11164295 T        | 35 | 13 C                     | 0.0006539  |
| rs2327342   | 20 | 11166478 A        | 35 | 13 C                     | 0.0006539  |
| rs1972192   | 20 | 11167617 T        | 35 | 13 C                     | 0.0006539  |
| rs6040418   | 20 | 11168405 T        | 35 | 13 C                     | 0.0006539  |
| rs6033050   | 20 | 11168518 A        | 35 | 13 G                     | 0.0006539  |
| rs6040420   | 20 | 11170323 G        | 35 | 13 A                     | 0.0006539  |
| rs6040422   | 20 | 11170748 A        | 35 | 13 T                     | 0.0006539  |
| rs6040423   | 20 | 11171070 G        | 35 | 13 A                     | 0.0006539  |
| rs2876217   | 20 | 11171441 C        | 35 | 13 T                     | 0.0006539  |
| rs4270418   | 20 | 11171828 C        | 35 | 13 T                     | 0.0006539  |
| rs113907634 | 20 | 11224146 AT       | 41 | 16 A                     | 0.0001053  |
| rs6040470   | 20 | 11229511 T        | 43 | 18 G                     | 0.0002635  |
| rs4632419   | 20 | 11232115 G        | 43 | 18 T                     | 0.0002635  |
| rs6040827   | 20 | 11645806 C        | 8  | 25 T                     | 0.0009004  |
| rs6134432   | 20 | 11991888 G        | 47 | 23 A                     | 0.0007443  |
| rs7270764   | 20 | 12007223 T        | 40 | 15 C                     | 0.0001692  |
| 20:13179440 | 20 | 13179440 T        | 48 | 22 TC                    | 0.0001103  |
| 20:13179441 | 20 | 13179441 T        | 48 | 22 C                     | 0.0001867  |
| 20:13179442 | 20 | 13179442 T        | 48 | 22 TTTCTTTC              | 0.0001867  |
| 20:13179448 | 20 | 13179448 T        | 44 | 20 TC                    | 0.000281   |
| 20:13179449 | 20 | 13179449 T        | 44 | 20 C                     | 0.0003204  |
| rs6079176   | 20 | 13780386 A        | 10 | 28 G                     | 0.000853   |
| 20:20160978 | 20 | 20160978 GAA      | 0  | 11 G                     | 0.0001744  |
| 20:24416229 | 20 | 24416229 A        | 1  | 13 G                     | 0.0005059  |
| rs77220650  | 20 | 29443602 A        | 3  | 17 T                     | 0.0007114  |
| rs79078695  | 20 | 32654817 G        | 4  | 21 T                     | 0.0001601  |
| rs79027916  | 20 | 32654818 A        | 4  | 21 C                     | 0.0001601  |
| rs77628996  | 20 | 40936657 G        | 2  | 16 T                     | 0.0003115  |
| rs3091552   | 20 | 45440006 C        | 35 | 12 G                     | 0.0003064  |
| rs6066089   | 20 | 45487371 C        | 37 | 15 G                     | 0.0009053  |
| rs67373293  | 20 | 49741626 T        | 3  | 17 C                     | 0.0006426  |



|             |    |                    |    |           |            |
|-------------|----|--------------------|----|-----------|------------|
| rs201827584 | 20 | 51719420 T         | 3  | 17 TTA    | 0.0006426  |
| rs201274209 | 20 | 51719425 A         | 3  | 18 ATAC   | 0.0003291  |
| rs56158048  | 20 | 52477216 G         | 19 | 3 C       | 0.0004265  |
| rs4811888   | 20 | 56182183 C         | 6  | 22 G      | 0.0007921  |
| rs12625713  | 20 | 56182533 G         | 6  | 22 C      | 0.0007921  |
| rs4811889   | 20 | 56183577 A         | 6  | 22 G      | 0.0007921  |
| rs71181929  | 20 | 56183820 TG        | 6  | 22 T      | 0.0007921  |
| rs4810089   | 20 | 56183918 T         | 6  | 22 C      | 0.0007921  |
| rs62204276  | 20 | 56183980 C         | 6  | 22 T      | 0.0007921  |
| rs167847    | 20 | 56521853 A         | 27 | 7 T       | 0.0002486  |
| rs2426761   | 20 | 56526972 G         | 37 | 13 A      | 0.0002102  |
| rs370087    | 20 | 56527490 T         | 37 | 13 C      | 0.0002102  |
| rs62206222  | 20 | 56528595 T         | 27 | 7 C       | 0.0002486  |
| rs354751    | 20 | 58905494 G         | 28 | 49 A      | 0.0008723  |
| rs11480224  | 20 | 60013970 TA        | 22 | 5 T       | 0.0006676  |
| rs4002829   | 20 | 60093065 CCTCAGCCT | 2  | 16 C      | 0.0003115  |
| rs6062322   | 20 | 62441599 T         | 28 | 9 A       | 0.0008484  |
| rs376743203 | 21 | 9476942 A          | 11 | 0 G       | 0.0007274  |
| 21:9969858  | 21 | 9969858 T          | 0  | 10 C      | 0.0005917  |
| rs1997577   | 21 | 16371102 T         | 5  | 20 A      | 0.0009659  |
| rs7280064   | 21 | 16377650 T         | 5  | 20 C      | 0.0009659  |
| rs139790892 | 21 | 16377682 GC        | 5  | 20 G      | 0.0009659  |
| rs2823006   | 21 | 16380994 C         | 5  | 20 G      | 0.0009659  |
| 21:16479311 | 21 | 16479311 G         | 2  | 18 T      | 0.00008557 |
| rs66681115  | 21 | 18238562 C         | 45 | 21 CA     | 0.0006315  |
| rs205676    | 21 | 19484268 C         | 26 | 7 T       | 0.0004518  |
| rs60962400  | 21 | 24791277 G         | 16 | 2 GA      | 0.0007845  |
| rs9982530   | 21 | 24794721 G         | 36 | 14 A      | 0.0007756  |
| rs462242    | 21 | 27569980 T         | 20 | 4 C       | 0.0007606  |
| rs9983828   | 21 | 32630308 C         | 28 | 52 T      | 0.0001612  |
| 21:33240138 | 21 | 33240138 A         | 0  | 11 G      | 0.0002715  |
| 21:36745167 | 21 | 36745167 A         | 22 | 43 ATATAT | 0.0006167  |
| rs722793    | 21 | 40405106 A         | 0  | 10 G      | 0.0005917  |
| rs2410079   | 21 | 40406395 T         | 0  | 10 C      | 0.0005917  |
| rs760159    | 21 | 40406734 G         | 0  | 10 T      | 0.0005917  |
| rs760158    | 21 | 40406983 T         | 0  | 10 A      | 0.0005917  |
| rs10617614  | 21 | 40407223 GTCA      | 0  | 10 G      | 0.0005917  |
| rs6517504   | 21 | 40407248 G         | 0  | 10 T      | 0.0005917  |
| rs516865    | 21 | 40937191 C         | 26 | 7 T       | 0.0008354  |
| rs112619200 | 21 | 40937832 AC        | 30 | 9 A       | 0.0002709  |

|             |    |          |             |    |    |     |           |
|-------------|----|----------|-------------|----|----|-----|-----------|
| rs523372    | 21 | 40937929 | G           | 30 | 9  | T   | 0.0002709 |
| 21:40938042 | 21 | 40938042 | AT          | 30 | 9  | A   | 0.0002709 |
| 21:40938043 | 21 | 40938043 | GACGTAGAAAT | 30 | 9  | G   | 0.0002709 |
| rs596320    | 21 | 40938269 | C           | 30 | 9  | T   | 0.0002709 |
| rs550774    | 21 | 40938562 | C           | 30 | 9  | T   | 0.0002709 |
| rs551624    | 21 | 40938643 | T           | 30 | 9  | C   | 0.0002709 |
| rs551830    | 21 | 40938715 | T           | 29 | 9  | C   | 0.0004831 |
| rs503729    | 21 | 40939493 | C           | 30 | 9  | G   | 0.0002709 |
| rs506387    | 21 | 40939762 | T           | 30 | 9  | C   | 0.0002709 |
| rs658066    | 21 | 40940223 | A           | 30 | 9  | G   | 0.0002709 |
| rs538329    | 21 | 40940934 | G           | 36 | 15 | C   | 0.0008629 |
| rs538333    | 21 | 40940939 | C           | 29 | 9  | A   | 0.0004831 |
| rs561166    | 21 | 40941132 | G           | 30 | 9  | T   | 0.0002709 |
| rs2837083   | 21 | 40941250 | A           | 29 | 9  | G   | 0.0004831 |
| rs59155174  | 21 | 40941274 | G           | 30 | 9  | A   | 0.0002709 |
| rs562285    | 21 | 40941308 | G           | 30 | 9  | C   | 0.0002709 |
| rs563230    | 21 | 40941401 | T           | 30 | 9  | C   | 0.0002709 |
| rs563259    | 21 | 40941412 | T           | 30 | 9  | C   | 0.0002709 |
| rs564126    | 21 | 40941498 | T           | 29 | 9  | C   | 0.0004831 |
| rs630270    | 21 | 40941891 | G           | 30 | 9  | A   | 0.0002709 |
| rs567837    | 21 | 40941914 | G           | 29 | 9  | C   | 0.0004831 |
| rs629432    | 21 | 40942040 | G           | 29 | 9  | A   | 0.0004831 |
| rs628995    | 21 | 40942130 | A           | 29 | 8  | T   | 0.0001956 |
| rs617259    | 21 | 40942493 | T           | 29 | 9  | C   | 0.0004831 |
| rs602107    | 21 | 40943606 | A           | 28 | 9  | T   | 0.0008484 |
| rs542531    | 21 | 40944237 | A           | 29 | 9  | C   | 0.0004831 |
| rs34797170  | 21 | 40944570 | C           | 29 | 9  | CT  | 0.0004831 |
| rs585092    | 21 | 40945028 | T           | 29 | 9  | G   | 0.0004831 |
| rs376474175 | 21 | 40945600 | G           | 24 | 6  | GTA | 0.0005592 |
| rs1734930   | 21 | 40946124 | A           | 29 | 9  | G   | 0.0004831 |
| rs636599    | 21 | 40947315 | C           | 29 | 9  | G   | 0.0004831 |
| rs2837398   | 21 | 41427168 | C           | 31 | 52 | A   | 0.0009496 |
| rs2837401   | 21 | 41428674 | G           | 31 | 52 | C   | 0.0009496 |
| rs2837403   | 21 | 41429463 | A           | 31 | 52 | G   | 0.0009496 |
| rs2837407   | 21 | 41433935 | A           | 55 | 30 | G   | 0.0006201 |
| rs2837411   | 21 | 41436645 | T           | 55 | 30 | C   | 0.0006201 |
| rs9636974   | 21 | 42144932 | G           | 21 | 43 | A   | 0.0003256 |
| rs7277230   | 21 | 42147572 | T           | 21 | 43 | C   | 0.0003256 |
| rs6517614   | 21 | 42150494 | T           | 21 | 41 | A   | 0.0009669 |
| rs62223059  | 21 | 42150902 | T           | 21 | 41 | A   | 0.0009669 |

|             |    |          |   |    |    |                        |            |
|-------------|----|----------|---|----|----|------------------------|------------|
| rs7277165   | 21 | 42154583 | A | 21 | 41 | G                      | 0.0009669  |
| rs7277205   | 21 | 42154651 | A | 21 | 41 | G                      | 0.0009669  |
| rs35336179  | 21 | 42178219 | T | 22 | 43 | C                      | 0.0006167  |
| rs35463403  | 21 | 45860024 | A | 45 | 21 | G                      | 0.0006315  |
| rs2236672   | 21 | 45863462 | G | 32 | 11 | A                      | 0.0004661  |
| rs73233027  | 21 | 45897827 | G | 0  | 10 | T                      | 0.0005917  |
| rs146490633 | 21 | 45899411 | C | 0  | 10 | G                      | 0.0005917  |
| rs62214403  | 21 | 46664698 | A | 11 | 0  | G                      | 0.0007274  |
| rs4818845   | 21 | 47966016 | G | 20 | 4  | C                      | 0.0007606  |
| rs2522310   | 22 | 17887725 | A | 28 | 8  | G                      | 0.0003544  |
| 22:21410890 | 22 | 21410890 | T | 0  | 10 | C                      | 0.0004558  |
| rs12627889  | 22 | 22739955 | A | 0  | 10 | G                      | 0.0005917  |
| rs4586741   | 22 | 22740278 | G | 0  | 11 | A                      | 0.0002715  |
| 22:23103428 | 22 | 23103428 | A | 34 | 11 | G                      | 0.0001478  |
| rs9612496   | 22 | 24221405 | C | 23 | 44 | G                      | 0.0006657  |
| rs9612497   | 22 | 24221445 | T | 23 | 44 | C                      | 0.0006657  |
| rs5760088   | 22 | 24232044 | C | 58 | 32 | T                      | 0.0005669  |
| rs9621351   | 22 | 32248370 | G | 3  | 17 | A                      | 0.0006426  |
| rs2157212   | 22 | 32262530 | A | 2  | 15 | C                      | 0.0006243  |
| rs5994440   | 22 | 32266157 | T | 3  | 17 | A                      | 0.0006426  |
| rs737084    | 22 | 32268400 | G | 3  | 17 | A                      | 0.0006426  |
| rs9621357   | 22 | 32275852 | A | 3  | 17 | G                      | 0.0006426  |
| rs738201    | 22 | 32665756 | C | 41 | 17 | A                      | 0.0004047  |
| rs132710    | 22 | 36593245 | G | 30 | 9  | A                      | 0.0002709  |
| rs5995288   | 22 | 36762634 | T | 43 | 20 | C                      | 0.0009741  |
| rs933224    | 22 | 36766003 | T | 44 | 20 | C                      | 0.0005739  |
| rs6000262   | 22 | 36770038 | A | 42 | 19 | G                      | 0.0008809  |
| rs13054971  | 22 | 37585922 | C | 6  | 22 | T                      | 0.0007921  |
| rs13056128  | 22 | 37587705 | A | 6  | 22 | T                      | 0.0007921  |
| rs35593514  | 22 | 37600011 | C | 6  | 22 | G                      | 0.0007921  |
| 22:39279512 | 22 | 39279512 | T | 0  | 10 | TTTTCTTTCTTTCTTTCTTTT( | 0.0005846  |
| rs11704096  | 22 | 44504928 | A | 16 | 35 | T                      | 0.000956   |
| rs71918181  | 22 | 44504958 | G | 16 | 35 | GT                     | 0.000956   |
| rs80680     | 22 | 45911590 | G | 16 | 2  | C                      | 0.0007845  |
| rs4990141   | 22 | 48318002 | T | 17 | 37 | C                      | 0.0006349  |
| rs5768176   | 22 | 48322535 | A | 20 | 41 | G                      | 0.0005156  |
| X:293456    | 23 | 293456   | A | 20 | 40 | AC                     | 0.0008835  |
| X:1649057   | 23 | 1649057  | G | 26 | 7  | C                      | 0.0004518  |
| X:2427310   | 23 | 2427310  | T | 19 | 3  | C                      | 0.0004265  |
| rs6642024   | 23 | 2723666  | C | 12 | 36 | T                      | 0.00002328 |

|             |    |               |    |        |            |
|-------------|----|---------------|----|--------|------------|
| rs11797301  | 23 | 2723715 G     | 8  | 29 T   | 0.00007515 |
| rs11152547  | 23 | 2724389 A     | 8  | 27 T   | 0.0002842  |
| rs7058222   | 23 | 2724429 C     | 8  | 27 A   | 0.0002641  |
| rs7062707   | 23 | 2724448 A     | 8  | 27 T   | 0.0002641  |
| rs35902344  | 23 | 2725036 CAT   | 10 | 34 C   | 0.00002152 |
| rs10709559  | 23 | 2729156 C     | 9  | 34 CT  | 0.00001697 |
| rs5939336   | 23 | 2729281 A     | 17 | 39 G   | 0.00008931 |
| rs200022655 | 23 | 2733843 C     | 10 | 32 CAT | 0.00008291 |
| rs5939340   | 23 | 2734838 G     | 10 | 30 A   | 0.0002687  |
| rs5939341   | 23 | 2734930 G     | 8  | 32 C   | 0.00001016 |
| rs113131499 | 23 | 2734948 AC    | 8  | 30 A   | 0.00001963 |
| rs5939342   | 23 | 2735539 G     | 12 | 33 A   | 0.0002456  |
| rs5939343   | 23 | 2735621 T     | 12 | 33 C   | 0.0002456  |
| rs5939344   | 23 | 2735741 T     | 12 | 33 A   | 0.0002456  |
| rs6642031   | 23 | 2735926 G     | 12 | 33 A   | 0.0002456  |
| rs35714686  | 23 | 2736120 TATTA | 12 | 33 T   | 0.0002456  |
| rs5939126   | 23 | 2736196 C     | 12 | 33 A   | 0.0002456  |
| rs1809566   | 23 | 2736301 C     | 12 | 33 G   | 0.0002456  |
| rs2316290   | 23 | 2736503 C     | 12 | 33 G   | 0.0002456  |
| rs6567653   | 23 | 2737097 G     | 12 | 33 A   | 0.0002456  |
| rs2018620   | 23 | 2737149 C     | 12 | 33 T   | 0.0002456  |
| rs5982869   | 23 | 2737194 C     | 12 | 33 T   | 0.0002456  |
| rs901321    | 23 | 2737282 A     | 12 | 31 G   | 0.0004121  |
| rs34306434  | 23 | 2737833 TC    | 13 | 33 T   | 0.0005413  |
| rs5939128   | 23 | 2737851 G     | 13 | 32 T   | 0.0009401  |
| rs62582293  | 23 | 2747703 T     | 3  | 18 C   | 0.0002953  |
| rs57068689  | 23 | 2748051 T     | 5  | 26 C   | 0.00002087 |
| rs6641656   | 23 | 2748292 C     | 7  | 26 G   | 0.0001833  |
| rs5939348   | 23 | 2748421 G     | 7  | 26 A   | 0.0001994  |
| rs73635389  | 23 | 2925674 T     | 11 | 0 C    | 0.0007274  |
| rs12398173  | 23 | 3454292 G     | 34 | 10 C   | 0.00006069 |
| rs113924529 | 23 | 3454890 A     | 19 | 40 G   | 0.0007691  |
| rs7473053   | 23 | 3457060 T     | 29 | 52 C   | 0.0002991  |
| rs11152506  | 23 | 3458348 A     | 29 | 52 G   | 0.0002991  |
| rs6567560   | 23 | 3459334 C     | 29 | 52 T   | 0.0002991  |
| rs7474188   | 23 | 3459801 T     | 29 | 52 C   | 0.0002991  |
| rs66534918  | 23 | 3464865 A     | 57 | 31 G   | 0.0007953  |
| rs7473251   | 23 | 3472918 A     | 20 | 40 G   | 0.0008835  |
| rs200267680 | 23 | 3473257 C     | 27 | 54 T   | 0.0000235  |
| rs201390777 | 23 | 3473264 C     | 30 | 52 G   | 0.0002835  |

|             |    |                      |    |      |             |
|-------------|----|----------------------|----|------|-------------|
| rs11152516  | 23 | 3473683 A            | 29 | 53 T | 0.00008254  |
| rs56004217  | 23 | 3474092 C            | 28 | 55 G | 0.00002438  |
| rs12397089  | 23 | 3474097 A            | 58 | 32 G | 0.0005669   |
| rs55992753  | 23 | 3474169 A            | 21 | 41 G | 0.0008957   |
| rs56038351  | 23 | 3474189 A            | 27 | 52 G | 0.0001468   |
| rs5961570   | 23 | 3474209 T            | 57 | 32 A | 0.0005282   |
| rs145303554 | 23 | 3474660 C            | 31 | 50 T | 0.0008282   |
| rs201951922 | 23 | 3474856 C            | 36 | 11 T | 0.0001415   |
| rs11152518  | 23 | 3475928 A            | 28 | 53 G | 0.00008787  |
| rs10449092  | 23 | 3477462 A            | 28 | 53 G | 0.00008787  |
| rs142408883 | 23 | 3477623 C            | 28 | 53 T | 0.00008787  |
| rs2041956   | 23 | 3478950 G            | 28 | 47 C | 0.0006892   |
| rs2041955   | 23 | 3479365 C            | 28 | 53 T | 0.00008787  |
| rs12847107  | 23 | 3484808 A            | 36 | 13 C | 0.0003739   |
| rs10442503  | 23 | 3489155 T            | 37 | 13 A | 0.0002102   |
| rs72619400  | 23 | 3509853 T            | 55 | 27 C | 0.0001001   |
| rs6567564   | 23 | 3510277 G            | 34 | 55 A | 0.0009818   |
| rs370663764 | 23 | 3547287 C            | 24 | 6 CT | 0.0006157   |
| rs17335289  | 23 | 3646417 A            | 31 | 11 C | 0.0008085   |
| rs7882598   | 23 | 3648159 G            | 36 | 14 C | 0.000808    |
| rs5962262   | 23 | 3648286 C            | 36 | 14 T | 0.0007756   |
| rs17335296  | 23 | 3648354 G            | 32 | 11 A | 0.0004661   |
| rs112303448 | 23 | 3648503 GAC          | 36 | 14 G | 0.0007756   |
| rs4826736   | 23 | 3648717 C            | 36 | 14 T | 0.0007756   |
| rs5915863   | 23 | 3649629 G            | 35 | 10 A | 0.00003249  |
| rs12688330  | 23 | 3649810 A            | 35 | 10 G | 0.00003249  |
| rs12687129  | 23 | 3649902 C            | 36 | 10 T | 0.00003012  |
| rs5915463   | 23 | 3650763 T            | 33 | 7 C  | 0.000009842 |
| rs5915465   | 23 | 3650958 A            | 33 | 9 G  | 0.00004367  |
| rs199679801 | 23 | 3651227 ATGGAGTTGCTC | 33 | 9 A  | 0.00004367  |
| rs5961720   | 23 | 3655467 G            | 32 | 10 A | 0.0003465   |
| rs4826685   | 23 | 3655560 C            | 32 | 10 A | 0.0003465   |
| rs5916123   | 23 | 3655986 T            | 19 | 42 C | 0.0001482   |
| rs4826699   | 23 | 3656889 C            | 32 | 10 T | 0.0002023   |
| rs58253239  | 23 | 3661855 C            | 29 | 10 A | 0.0004412   |
| rs191848608 | 23 | 3661859 C            | 29 | 10 A | 0.0004412   |
| rs60181494  | 23 | 3661863 C            | 29 | 10 A | 0.0004412   |
| rs6641619   | 23 | 3663728 G            | 28 | 9 A  | 0.0008484   |
| rs6641876   | 23 | 3664074 C            | 28 | 8 T  | 0.0003544   |
| rs59003681  | 23 | 3664764 G            | 28 | 8 A  | 0.0003544   |

|             |    |                |    |         |            |
|-------------|----|----------------|----|---------|------------|
| rs67132522  | 23 | 3665013 C      | 28 | 5 T     | 0.00001652 |
| rs73444704  | 23 | 3665110 T      | 28 | 7 G     | 0.0001348  |
| rs67926068  | 23 | 3665113 G      | 28 | 7 A     | 0.0001348  |
| rs6641877   | 23 | 3665204 A      | 28 | 7 G     | 0.0001348  |
| rs5915772   | 23 | 4591677 T      | 10 | 29 C    | 0.0004811  |
| rs5916687   | 23 | 4596138 A      | 10 | 31 G    | 0.0001457  |
| rs5916688   | 23 | 4596415 T      | 10 | 31 C    | 0.0001457  |
| rs12848207  | 23 | 4601110 A      | 10 | 32 C    | 0.00007826 |
| rs3085321   | 23 | 4622803 G      | 55 | 30 GAT  | 0.0006201  |
| rs5916696   | 23 | 4627822 A      | 23 | 44 G    | 0.0006657  |
| rs7881910   | 23 | 4628697 A      | 58 | 31 C    | 0.0002058  |
| rs5916697   | 23 | 4628916 T      | 32 | 55 C    | 0.0003175  |
| rs17315343  | 23 | 5915431 C      | 2  | 17 T    | 0.000131   |
| rs72609517  | 23 | 6040845 G      | 0  | 11 A    | 0.0007003  |
| rs200717890 | 23 | 6041758 GGAAAA | 0  | 11 G    | 0.0002676  |
| rs1534257   | 23 | 8357507 T      | 28 | 9 C     | 0.0008484  |
| rs1534256   | 23 | 8357650 C      | 28 | 9 T     | 0.0008484  |
| rs2404238   | 23 | 8357913 C      | 28 | 9 T     | 0.0008484  |
| rs56408029  | 23 | 8375974 A      | 28 | 9 G     | 0.0008484  |
| rs56067383  | 23 | 8376177 A      | 28 | 9 AC    | 0.0008484  |
| rs67848764  | 23 | 8376750 T      | 28 | 9 A     | 0.0008484  |
| rs7058555   | 23 | 8376774 G      | 28 | 9 C     | 0.0008484  |
| rs7057664   | 23 | 8376875 A      | 28 | 9 G     | 0.0008484  |
| rs5934413   | 23 | 8379511 T      | 28 | 9 C     | 0.0008484  |
| rs55853704  | 23 | 8933953 T      | 26 | 47 C    | 0.0007993  |
| rs5979053   | 23 | 9202415 T      | 4  | 20 C    | 0.0003114  |
| rs35252422  | 23 | 9296151 CGTGT  | 17 | 2 C     | 0.0004014  |
| rs17321120  | 23 | 9685901 C      | 3  | 21 T    | 0.00003567 |
| rs4830653   | 23 | 9732976 G      | 2  | 16 A    | 0.0002695  |
| rs58367116  | 23 | 9904364 C      | 30 | 8 T     | 0.0000914  |
| rs186107305 | 23 | 11865681 A     | 0  | 10 G    | 0.0005917  |
| rs5933925   | 23 | 11866903 C     | 0  | 10 A    | 0.0005917  |
| rs5935176   | 23 | 11888070 C     | 0  | 10 T    | 0.0005917  |
| rs6629958   | 23 | 14291313 C     | 50 | 24 T    | 0.0002688  |
| rs137905720 | 23 | 14325441 C     | 24 | 45 CCTT | 0.0007128  |
| rs7063332   | 23 | 14325565 G     | 24 | 45 A    | 0.0007128  |
| rs929210    | 23 | 14326895 A     | 25 | 46 G    | 0.0007575  |
| rs1015805   | 23 | 14329490 G     | 24 | 45 C    | 0.0007128  |
| rs1016539   | 23 | 14333489 T     | 24 | 45 G    | 0.0007128  |
| rs11797584  | 23 | 14335690 T     | 24 | 45 C    | 0.0007128  |

|             |    |          |    |    |    |       |           |
|-------------|----|----------|----|----|----|-------|-----------|
| rs5935726   | 23 | 14336239 | A  | 24 | 45 | G     | 0.0007128 |
| rs5935728   | 23 | 14339619 | A  | 24 | 45 | G     | 0.0007128 |
| rs5978678   | 23 | 14340631 | T  | 22 | 43 | C     | 0.000565  |
| rs5934166   | 23 | 14340866 | T  | 24 | 45 | C     | 0.0007128 |
| rs5935729   | 23 | 14341240 | T  | 24 | 45 | C     | 0.0007128 |
| rs5935730   | 23 | 14341322 | C  | 24 | 45 | G     | 0.0007128 |
| rs5935731   | 23 | 14341387 | C  | 24 | 45 | T     | 0.0007128 |
| rs2023720   | 23 | 14341735 | C  | 24 | 45 | G     | 0.0007128 |
| rs1468160   | 23 | 14343597 | C  | 30 | 53 | T     | 0.0003072 |
| rs5935734   | 23 | 14344569 | C  | 25 | 46 | T     | 0.0004176 |
| rs2375482   | 23 | 14347263 | G  | 24 | 46 | A     | 0.0004131 |
| rs147454328 | 23 | 14358279 | T  | 24 | 45 | TA    | 0.0007128 |
| rs6527696   | 23 | 16682119 | T  | 55 | 28 | C     | 0.000189  |
| rs6527697   | 23 | 16682120 | G  | 56 | 28 | A     | 0.0001045 |
| rs6632862   | 23 | 16682634 | A  | 55 | 30 | G     | 0.0006201 |
| rs6632863   | 23 | 16682662 | C  | 55 | 30 | T     | 0.0006201 |
| rs6632864   | 23 | 16685391 | G  | 53 | 25 | T     | 0.0000896 |
| rs150007863 | 23 | 19089203 | G  | 1  | 13 | A     | 0.0005059 |
| rs6633367   | 23 | 20539729 | G  | 3  | 17 | A     | 0.0006426 |
| rs201976263 | 23 | 20542988 | T  | 3  | 17 | TCA   | 0.0006426 |
| rs7066051   | 23 | 20547872 | C  | 3  | 17 | G     | 0.0006426 |
| rs12393059  | 23 | 20548370 | T  | 3  | 17 | C     | 0.0006426 |
| rs73195325  | 23 | 20552304 | G  | 3  | 17 | A     | 0.0006426 |
| rs114595430 | 23 | 20553163 | T  | 3  | 17 | G     | 0.0006426 |
| rs73197242  | 23 | 20553808 | G  | 3  | 17 | A     | 0.0006426 |
| rs73197243  | 23 | 20554789 | C  | 3  | 17 | A     | 0.0006426 |
| rs13440692  | 23 | 20561825 | C  | 3  | 17 | T     | 0.0006426 |
| rs7876243   | 23 | 20563226 | C  | 3  | 17 | T     | 0.0006426 |
| rs73197245  | 23 | 20566238 | A  | 3  | 17 | G     | 0.0006426 |
| rs73197246  | 23 | 20567524 | A  | 3  | 17 | G     | 0.0006426 |
| rs35059902  | 23 | 20568060 | CT | 3  | 17 | C     | 0.0006426 |
| rs6633370   | 23 | 20572466 | A  | 3  | 17 | G     | 0.0006426 |
| rs139700732 | 23 | 20574394 | C  | 3  | 17 | T     | 0.0006426 |
| rs114937107 | 23 | 20576035 | T  | 3  | 17 | C     | 0.0006426 |
| rs73197249  | 23 | 20583665 | T  | 3  | 17 | C     | 0.0006426 |
| rs73197250  | 23 | 20585189 | A  | 3  | 17 | G     | 0.0006426 |
| rs73197252  | 23 | 20587501 | A  | 3  | 17 | G     | 0.0006426 |
| rs370229060 | 23 | 20592701 | C  | 2  | 17 | CCAAA | 0.0001534 |
| rs73197255  | 23 | 20606076 | T  | 2  | 15 | C     | 0.0006243 |
| rs5925658   | 23 | 22761345 | C  | 53 | 25 | T     | 0.0000896 |

|             |    |          |    |    |    |           |            |
|-------------|----|----------|----|----|----|-----------|------------|
| rs2465828   | 23 | 23140838 | G  | 17 | 41 | A         | 0.0001079  |
| rs73205366  | 23 | 23399373 | C  | 0  | 11 | A         | 0.0002715  |
| rs73205368  | 23 | 23399501 | C  | 0  | 11 | T         | 0.0002715  |
| rs5971115   | 23 | 23405681 | T  | 28 | 52 | G         | 0.0001612  |
| rs6627921   | 23 | 23406394 | G  | 28 | 50 | C         | 0.0005077  |
| rs6627922   | 23 | 23406598 | G  | 23 | 50 | A         | 0.00001837 |
| rs6418526   | 23 | 23406691 | C  | 29 | 51 | G         | 0.0005253  |
| rs6627923   | 23 | 23406797 | G  | 24 | 50 | A         | 0.00003799 |
| rs3810719   | 23 | 23415889 | G  | 30 | 51 | A         | 0.0009286  |
| rs181821571 | 23 | 23442241 | T  | 0  | 10 | C         | 0.0005917  |
| rs5926337   | 23 | 23465760 | C  | 19 | 1  | T         | 0.00001683 |
| rs5926339   | 23 | 23470309 | C  | 56 | 31 | T         | 0.0006352  |
| rs5971138   | 23 | 23470730 | C  | 56 | 31 | A         | 0.0006352  |
| rs5925778   | 23 | 23472193 | G  | 56 | 31 | C         | 0.0006352  |
| rs202224294 | 23 | 23474528 | T  | 57 | 31 | TTATTGCTC | 0.0003656  |
| rs5925780   | 23 | 23475262 | C  | 57 | 31 | G         | 0.0003656  |
| rs2885476   | 23 | 23476042 | T  | 56 | 32 | C         | 0.0004905  |
| rs7052935   | 23 | 23480785 | C  | 57 | 30 | T         | 0.0002015  |
| rs7888798   | 23 | 23482692 | C  | 56 | 30 | T         | 0.0003574  |
| rs4278290   | 23 | 23482926 | A  | 56 | 30 | C         | 0.0003574  |
| rs4828863   | 23 | 23495802 | T  | 40 | 16 | G         | 0.0003516  |
| rs4317728   | 23 | 23496583 | G  | 55 | 30 | C         | 0.0006201  |
| rs5925789   | 23 | 23497147 | C  | 55 | 26 | T         | 0.00005151 |
| rs5970583   | 23 | 23497728 | G  | 55 | 30 | T         | 0.0006201  |
| rs4593719   | 23 | 23497951 | C  | 55 | 30 | T         | 0.0006201  |
| rs4240085   | 23 | 23498240 | C  | 55 | 30 | T         | 0.0006201  |
| rs6526294   | 23 | 23498826 | G  | 56 | 30 | C         | 0.0003574  |
| rs4828813   | 23 | 23501880 | T  | 54 | 28 | C         | 0.0003346  |
| rs5970585   | 23 | 23502925 | A  | 53 | 28 | C         | 0.00058    |
| rs7062129   | 23 | 23506555 | T  | 53 | 28 | C         | 0.00058    |
| rs5925796   | 23 | 23509238 | T  | 56 | 30 | C         | 0.0003574  |
| rs61604846  | 23 | 23509794 | GT | 56 | 30 | G         | 0.000584   |
| rs4408049   | 23 | 23511493 | A  | 54 | 28 | C         | 0.0003346  |
| rs5970737   | 23 | 23513708 | C  | 56 | 30 | T         | 0.0003574  |
| rs35272218  | 23 | 23514456 | AT | 55 | 30 | A         | 0.0005501  |
| rs4828866   | 23 | 23518802 | C  | 54 | 31 | T         | 0.0007456  |
| rs4828867   | 23 | 23521028 | A  | 37 | 14 | G         | 0.0004475  |
| rs11094927  | 23 | 23533219 | C  | 57 | 30 | T         | 0.0002015  |
| rs7054852   | 23 | 23533794 | C  | 57 | 30 | A         | 0.0002015  |
| rs11094928  | 23 | 23535091 | C  | 57 | 30 | T         | 0.0002015  |



|             |    |                         |    |      |            |
|-------------|----|-------------------------|----|------|------------|
| rs12394178  | 23 | 23536023 T              | 57 | 30 A | 0.0002015  |
| rs12388791  | 23 | 23536126 A              | 55 | 30 G | 0.0006201  |
| rs12394282  | 23 | 23536177 T              | 54 | 29 A | 0.0006016  |
| rs55794528  | 23 | 23536430 A              | 57 | 30 T | 0.0002015  |
| rs55918751  | 23 | 23536683 G              | 57 | 30 A | 0.0002015  |
| rs4551501   | 23 | 23538505 C              | 56 | 30 G | 0.0003574  |
| rs76329348  | 23 | 23538812 A              | 55 | 30 G | 0.0006201  |
| rs201371812 | 23 | 23539122 GATTGTTTGAGTTC | 56 | 30 G | 0.0003574  |
| rs4828869   | 23 | 23539695 G              | 58 | 31 A | 0.0002058  |
| rs4828870   | 23 | 23539699 C              | 58 | 31 T | 0.0002058  |
| rs4828815   | 23 | 23540435 C              | 57 | 30 T | 0.0002015  |
| rs7064719   | 23 | 23541432 A              | 13 | 35 G | 0.0001638  |
| rs5970745   | 23 | 23542870 A              | 18 | 38 G | 0.0007166  |
| rs5925817   | 23 | 23548275 A              | 52 | 28 G | 0.0009847  |
| rs6629690   | 23 | 23598811 G              | 55 | 28 A | 0.000189   |
| rs192430333 | 23 | 26150490 G              | 14 | 1 C  | 0.000663   |
| rs143450119 | 23 | 26153200 T              | 14 | 1 C  | 0.0006347  |
| rs141122379 | 23 | 26222568 A              | 14 | 1 G  | 0.0006347  |
| rs146979379 | 23 | 26265498 C              | 14 | 1 G  | 0.0006347  |
| rs145026071 | 23 | 26293486 G              | 14 | 1 A  | 0.0006347  |
| rs140699821 | 23 | 26341000 T              | 14 | 1 G  | 0.0006347  |
| rs5926577   | 23 | 28323036 T              | 28 | 7 A  | 0.0001348  |
| rs12391023  | 23 | 28323501 A              | 28 | 7 C  | 0.0001348  |
| rs12856271  | 23 | 28323519 G              | 28 | 7 T  | 0.0001348  |
| rs35197417  | 23 | 28326346 T              | 28 | 7 C  | 0.0001348  |
| rs10449058  | 23 | 28433024 C              | 0  | 10 A | 0.0005917  |
| rs12387440  | 23 | 28770293 G              | 30 | 8 A  | 0.0001064  |
| rs10521946  | 23 | 28770685 A              | 30 | 8 G  | 0.0001064  |
| rs12846361  | 23 | 28776628 G              | 30 | 8 A  | 0.0001064  |
| rs10521948  | 23 | 28839903 A              | 22 | 5 G  | 0.0006676  |
| rs35096792  | 23 | 28850298 C              | 22 | 5 G  | 0.0006676  |
| rs1842879   | 23 | 28851539 A              | 22 | 4 C  | 0.0002148  |
| rs199910251 | 23 | 28852390 ATCT           | 22 | 5 A  | 0.0006676  |
| rs55870411  | 23 | 29366069 A              | 27 | 48 G | 0.0008377  |
| rs145046946 | 23 | 29937522 G              | 0  | 10 A | 0.0005917  |
| rs12556783  | 23 | 30513862 C              | 15 | 1 T  | 0.0003131  |
| rs202070431 | 23 | 30571258 A              | 14 | 1 G  | 0.0006286  |
| rs201069997 | 23 | 30571260 A              | 14 | 1 G  | 0.0006286  |
| rs2405153   | 23 | 31850711 C              | 59 | 30 G | 0.00005988 |
| rs1463493   | 23 | 31852903 G              | 16 | 41 A | 0.0000497  |

|             |    |          |       |    |    |     |            |
|-------------|----|----------|-------|----|----|-----|------------|
| rs6653576   | 23 | 31853688 | A     | 18 | 41 | T   | 0.0001308  |
| rs6653577   | 23 | 31853768 | C     | 18 | 39 | T   | 0.0004141  |
| rs331318    | 23 | 32324466 | C     | 56 | 31 | T   | 0.0006352  |
| rs3788900   | 23 | 32352246 | T     | 25 | 46 | C   | 0.0007575  |
| rs721422    | 23 | 32352714 | T     | 25 | 46 | C   | 0.0007575  |
| rs4829252   | 23 | 32356321 | C     | 27 | 49 | T   | 0.0004874  |
| rs926953    | 23 | 32364660 | T     | 25 | 46 | C   | 0.0007575  |
| rs6527189   | 23 | 32374317 | T     | 26 | 50 | A   | 0.0001475  |
| rs145839936 | 23 | 32374759 | GGTTA | 30 | 51 | G   | 0.0009286  |
| rs113982864 | 23 | 32375099 | T     | 2  | 18 | C   | 0.00007463 |
| rs67626720  | 23 | 32375433 | T     | 2  | 18 | C   | 0.00006478 |
| rs5927972   | 23 | 32376945 | G     | 29 | 50 | A   | 0.0009027  |
| rs57445410  | 23 | 32377166 | A     | 2  | 19 | T   | 0.00003587 |
| rs41303181  | 23 | 32408311 | C     | 0  | 10 | T   | 0.0005917  |
| rs7882841   | 23 | 32416812 | C     | 3  | 17 | T   | 0.0006426  |
| rs60017465  | 23 | 32418245 | C     | 3  | 17 | T   | 0.0006426  |
| rs7891076   | 23 | 32418611 | T     | 3  | 17 | C   | 0.0006426  |
| rs60364627  | 23 | 32419451 | TA    | 3  | 17 | T   | 0.0006426  |
| rs962012    | 23 | 32420096 | G     | 3  | 17 | C   | 0.0006426  |
| rs962013    | 23 | 32420335 | T     | 3  | 17 | C   | 0.0006426  |
| rs56152215  | 23 | 32421209 | C     | 3  | 17 | G   | 0.0006426  |
| rs55811023  | 23 | 32421430 | C     | 3  | 17 | T   | 0.0006426  |
| rs56132370  | 23 | 32421613 | G     | 3  | 17 | A   | 0.0006426  |
| rs16990306  | 23 | 32422265 | A     | 3  | 17 | G   | 0.0006426  |
| rs56395123  | 23 | 32422846 | A     | 3  | 17 | G   | 0.0006426  |
| rs66506532  | 23 | 32423285 | G     | 3  | 17 | A   | 0.0006426  |
| rs16990311  | 23 | 32423481 | T     | 3  | 17 | C   | 0.0006426  |
| rs10598359  | 23 | 32423605 | A     | 3  | 17 | AAG | 0.0006426  |
| rs7882139   | 23 | 32424108 | C     | 3  | 17 | G   | 0.0006426  |
| rs187302049 | 23 | 32424276 | T     | 3  | 17 | C   | 0.0006426  |
| rs2207798   | 23 | 32424896 | G     | 3  | 17 | A   | 0.0006426  |
| rs2224126   | 23 | 32424901 | C     | 3  | 17 | T   | 0.0006426  |
| rs142815666 | 23 | 32425158 | A     | 3  | 17 | T   | 0.0006426  |
| rs149976886 | 23 | 32425179 | T     | 3  | 17 | C   | 0.0006426  |
| rs144342404 | 23 | 32425218 | A     | 3  | 17 | C   | 0.0006426  |
| rs113225073 | 23 | 32426218 | C     | 3  | 17 | T   | 0.0006426  |
| rs73619075  | 23 | 32426260 | A     | 3  | 17 | G   | 0.0006426  |
| rs73619076  | 23 | 32428012 | T     | 3  | 17 | C   | 0.0006426  |
| rs55768447  | 23 | 32428228 | G     | 3  | 17 | A   | 0.0006426  |
| rs10521994  | 23 | 32428596 | A     | 3  | 17 | G   | 0.0006426  |

|             |    |          |    |   |    |          |           |
|-------------|----|----------|----|---|----|----------|-----------|
| rs56094071  | 23 | 32430503 | T  | 3 | 17 | A        | 0.0006426 |
| rs10521995  | 23 | 32430767 | T  | 3 | 17 | C        | 0.0006426 |
| rs55717900  | 23 | 32431030 | C  | 3 | 17 | T        | 0.0006426 |
| rs113058119 | 23 | 32431084 | T  | 3 | 17 | C        | 0.0006426 |
| rs58067019  | 23 | 32431237 | T  | 3 | 17 | C        | 0.0006426 |
| rs3761606   | 23 | 32432718 | G  | 4 | 20 | A        | 0.0003114 |
| rs10521996  | 23 | 32432855 | G  | 4 | 20 | C        | 0.0003114 |
| rs12392232  | 23 | 32434506 | C  | 3 | 17 | A        | 0.0006426 |
| rs16990333  | 23 | 32434554 | G  | 3 | 17 | A        | 0.0006426 |
| rs10521997  | 23 | 32435412 | T  | 3 | 20 | C        | 0.0000828 |
| rs16998301  | 23 | 32436410 | A  | 3 | 17 | G        | 0.0006426 |
| rs10521998  | 23 | 32437853 | C  | 3 | 20 | A        | 0.0000828 |
| rs3827460   | 23 | 32437885 | C  | 4 | 20 | T        | 0.0003114 |
| rs56266543  | 23 | 32437990 | A  | 4 | 20 | AAGCATTG | 0.0003114 |
| rs12387844  | 23 | 32438873 | G  | 4 | 20 | A        | 0.0003114 |
| rs60403469  | 23 | 32439300 | A  | 3 | 17 | G        | 0.0006426 |
| rs145233065 | 23 | 32439554 | GA | 3 | 20 | G        | 0.0000828 |
| rs16990354  | 23 | 32439579 | T  | 3 | 20 | C        | 0.0000828 |
| rs3788905   | 23 | 32439812 | C  | 5 | 20 | T        | 0.0009659 |
| rs7064842   | 23 | 32439889 | G  | 3 | 20 | C        | 0.0000828 |
| rs7064732   | 23 | 32439928 | G  | 3 | 20 | A        | 0.0000828 |
| rs7064854   | 23 | 32439932 | A  | 3 | 20 | C        | 0.0000828 |
| rs7065395   | 23 | 32440087 | A  | 3 | 20 | G        | 0.0000828 |
| rs7066496   | 23 | 32440258 | A  | 3 | 20 | T        | 0.0000828 |
| rs7065493   | 23 | 32440404 | T  | 3 | 20 | A        | 0.0000828 |
| rs7051685   | 23 | 32440587 | A  | 5 | 20 | G        | 0.0009659 |
| rs10521999  | 23 | 32440977 | G  | 5 | 20 | A        | 0.0009659 |
| rs7053451   | 23 | 32441181 | C  | 5 | 20 | T        | 0.0009659 |
| rs16998308  | 23 | 32442346 | C  | 3 | 20 | T        | 0.0000828 |
| rs58831952  | 23 | 32442538 | T  | 3 | 20 | A        | 0.0000828 |
| rs55718503  | 23 | 32443913 | T  | 3 | 20 | A        | 0.0000828 |
| rs56234042  | 23 | 32444222 | G  | 3 | 17 | C        | 0.0006426 |
| rs12007963  | 23 | 32444463 | A  | 5 | 20 | C        | 0.0009659 |
| rs12012720  | 23 | 32444870 | C  | 3 | 20 | T        | 0.0000828 |
| rs73619077  | 23 | 32444911 | A  | 3 | 17 | G        | 0.0006426 |
| rs7050950   | 23 | 32446098 | T  | 3 | 20 | G        | 0.0000828 |
| rs7051000   | 23 | 32446301 | T  | 5 | 20 | C        | 0.0009659 |
| rs60545338  | 23 | 32446316 | G  | 5 | 20 | A        | 0.0009659 |
| rs56787928  | 23 | 32446701 | A  | 5 | 20 | G        | 0.0009659 |
| rs73619079  | 23 | 32447015 | T  | 3 | 20 | C        | 0.0000828 |

|             |    |          |       |    |    |        |           |
|-------------|----|----------|-------|----|----|--------|-----------|
| rs73619080  | 23 | 32447177 | A     | 3  | 20 | G      | 0.0000828 |
| rs10522001  | 23 | 32447855 | G     | 5  | 20 | A      | 0.0009659 |
| rs57582722  | 23 | 32448139 | G     | 3  | 20 | T      | 0.0000828 |
| rs73619083  | 23 | 32449948 | A     | 3  | 20 | G      | 0.0000828 |
| rs73619084  | 23 | 32450026 | A     | 5  | 20 | G      | 0.0009659 |
| rs16990375  | 23 | 32450742 | C     | 3  | 20 | T      | 0.0000828 |
| rs6631580   | 23 | 32453737 | T     | 3  | 17 | C      | 0.0006426 |
| rs12559442  | 23 | 32461630 | A     | 1  | 13 | G      | 0.0005059 |
| X:32624859  | 23 | 32624859 | T     | 3  | 18 | TAC    | 0.0003291 |
| rs199511492 | 23 | 33509576 | T     | 2  | 15 | TAAATA | 0.0006243 |
| rs12156989  | 23 | 33540856 | T     | 2  | 15 | C      | 0.0006243 |
| rs5928322   | 23 | 33547621 | C     | 2  | 15 | T      | 0.0006243 |
| rs202044715 | 23 | 33551598 | GA    | 2  | 15 | G      | 0.0005586 |
| rs5928325   | 23 | 33554170 | C     | 5  | 20 | G      | 0.0009659 |
| X:33556441  | 23 | 33556441 | CA    | 2  | 15 | C      | 0.0006243 |
| rs5928328   | 23 | 33557903 | C     | 2  | 15 | A      | 0.0006243 |
| rs142445332 | 23 | 33567684 | C     | 2  | 15 | T      | 0.0006243 |
| rs34213377  | 23 | 34039627 | T     | 0  | 11 | G      | 0.0002715 |
| rs79656436  | 23 | 34066593 | G     | 0  | 11 | A      | 0.0002355 |
| rs4827015   | 23 | 39360766 | A     | 21 | 41 | G      | 0.0009669 |
| rs35162982  | 23 | 39361891 | AT    | 21 | 41 | A      | 0.0009669 |
| rs4827159   | 23 | 39363899 | G     | 21 | 41 | A      | 0.0009669 |
| rs5917842   | 23 | 39367677 | T     | 21 | 41 | C      | 0.0009669 |
| rs4827016   | 23 | 39369141 | T     | 21 | 41 | C      | 0.0009669 |
| rs5917310   | 23 | 39369598 | C     | 21 | 42 | T      | 0.0005665 |
| rs902256    | 23 | 39371271 | C     | 21 | 42 | T      | 0.0005665 |
| rs5963667   | 23 | 39372355 | C     | 21 | 42 | T      | 0.0005665 |
| rs5963668   | 23 | 39372465 | A     | 21 | 43 | G      | 0.0003256 |
| rs140937319 | 23 | 41261816 | A     | 4  | 19 | C      | 0.0005969 |
| X:41868970  | 23 | 41868970 | A     | 0  | 10 | G      | 0.0005917 |
| rs73624973  | 23 | 41975911 | G     | 16 | 2  | A      | 0.0007845 |
| rs17214625  | 23 | 41978484 | G     | 16 | 2  | A      | 0.0007845 |
| rs17280548  | 23 | 41981146 | G     | 16 | 2  | A      | 0.0007845 |
| rs76657601  | 23 | 42085019 | A     | 21 | 4  | G      | 0.0008791 |
| rs1207265   | 23 | 46095451 | A     | 20 | 42 | T      | 0.0002952 |
| rs34139282  | 23 | 46096980 | TATAG | 20 | 42 | T      | 0.0001632 |
| rs1207263   | 23 | 46098697 | A     | 20 | 42 | T      | 0.0002952 |
| rs1207270   | 23 | 46112988 | T     | 20 | 41 | C      | 0.0005156 |
| rs5906176   | 23 | 46189488 | G     | 54 | 29 | C      | 0.0006016 |
| rs5906178   | 23 | 46192269 | T     | 54 | 29 | C      | 0.0006016 |

|             |    |          |       |    |    |     |           |
|-------------|----|----------|-------|----|----|-----|-----------|
| rs6521095   | 23 | 46194662 | G     | 55 | 30 | A   | 0.0006201 |
| rs5906179   | 23 | 46194689 | C     | 55 | 30 | A   | 0.0006201 |
| rs2355334   | 23 | 46199816 | C     | 54 | 29 | G   | 0.0006016 |
| rs5952855   | 23 | 46202327 | G     | 54 | 29 | A   | 0.0006016 |
| rs4239960   | 23 | 46203667 | C     | 54 | 29 | A   | 0.0006016 |
| rs5906180   | 23 | 46203987 | C     | 54 | 29 | T   | 0.0006016 |
| rs5952864   | 23 | 46234850 | C     | 52 | 29 | T   | 0.0007301 |
| rs5905532   | 23 | 46235267 | T     | 52 | 27 | C   | 0.0004991 |
| rs73630223  | 23 | 46247540 | T     | 55 | 29 | G   | 0.0005668 |
| rs57903655  | 23 | 47386025 | CT    | 5  | 21 | C   | 0.0005044 |
| rs13328514  | 23 | 47393711 | G     | 13 | 33 | C   | 0.0005413 |
| rs13328515  | 23 | 47393752 | G     | 13 | 33 | C   | 0.0005413 |
| rs5906422   | 23 | 47398816 | A     | 11 | 31 | G   | 0.0003471 |
| rs5906423   | 23 | 47398889 | A     | 11 | 31 | T   | 0.0003471 |
| rs5953051   | 23 | 47401302 | C     | 10 | 31 | T   | 0.0001457 |
| rs199965927 | 23 | 47401422 | AAAAC | 10 | 31 | A   | 0.0001457 |
| rs73206116  | 23 | 47402046 | G     | 6  | 22 | A   | 0.0007921 |
| rs5952437   | 23 | 47402470 | C     | 9  | 29 | T   | 0.0001986 |
| rs11450456  | 23 | 47403970 | CA    | 10 | 28 | C   | 0.000853  |
| rs5906427   | 23 | 47407427 | G     | 10 | 29 | T   | 0.0004811 |
| rs5953057   | 23 | 47410025 | T     | 10 | 29 | C   | 0.0004811 |
| rs67848181  | 23 | 47411823 | T     | 8  | 28 | C   | 0.000142  |
| rs4824621   | 23 | 47450276 | C     | 9  | 27 | T   | 0.000654  |
| rs4824622   | 23 | 47450580 | C     | 9  | 27 | T   | 0.000654  |
| rs62592125  | 23 | 47450949 | A     | 9  | 27 | G   | 0.0003604 |
| rs5953061   | 23 | 47451476 | C     | 9  | 27 | T   | 0.000654  |
| rs5953062   | 23 | 47451559 | A     | 9  | 27 | G   | 0.000654  |
| rs73206134  | 23 | 47453025 | C     | 5  | 21 | T   | 0.0005184 |
| rs5953063   | 23 | 47454598 | A     | 9  | 27 | G   | 0.000654  |
| rs5906437   | 23 | 47455346 | G     | 9  | 27 | A   | 0.000654  |
| rs9887335   | 23 | 47459125 | G     | 9  | 27 | A   | 0.000654  |
| rs5953066   | 23 | 47461549 | T     | 9  | 27 | C   | 0.000654  |
| rs4824424   | 23 | 47462630 | T     | 9  | 27 | C   | 0.000654  |
| rs4824623   | 23 | 47462631 | G     | 9  | 27 | T   | 0.000654  |
| rs149060491 | 23 | 48970697 | A     | 13 | 0  | G   | 0.00016   |
| rs142430804 | 23 | 48985571 | A     | 12 | 0  | G   | 0.0003422 |
| rs202078647 | 23 | 49057656 | C     | 12 | 0  | CAG | 0.0003422 |
| rs73209799  | 23 | 49160980 | A     | 12 | 0  | G   | 0.0003422 |
| rs148107284 | 23 | 49399422 | A     | 12 | 0  | G   | 0.0003422 |
| rs2028329   | 23 | 51574091 | C     | 2  | 15 | G   | 0.0006243 |

|             |    |          |    |    |    |                       |            |
|-------------|----|----------|----|----|----|-----------------------|------------|
| rs145718598 | 23 | 51843635 | T  | 2  | 15 | A                     | 0.0006243  |
| rs143928923 | 23 | 51906541 | A  | 2  | 15 | C                     | 0.0006243  |
| rs4986582   | 23 | 53044825 | A  | 6  | 23 | T                     | 0.000429   |
| rs5991831   | 23 | 53045870 | T  | 6  | 23 | C                     | 0.000429   |
| rs5991832   | 23 | 53045948 | T  | 6  | 23 | C                     | 0.000429   |
| rs5951137   | 23 | 53049271 | T  | 6  | 23 | C                     | 0.000429   |
| rs5951152   | 23 | 53051705 | T  | 6  | 23 | C                     | 0.0004533  |
| rs5951153   | 23 | 53051782 | T  | 6  | 23 | G                     | 0.0003888  |
| rs5951139   | 23 | 53052155 | C  | 6  | 24 | T                     | 0.0002208  |
| rs5951140   | 23 | 53052302 | C  | 7  | 24 | T                     | 0.0006277  |
| rs6643517   | 23 | 53053254 | C  | 6  | 23 | T                     | 0.000429   |
| rs6643602   | 23 | 53056259 | G  | 6  | 23 | A                     | 0.000429   |
| rs2495795   | 23 | 54095232 | C  | 2  | 16 | T                     | 0.0003115  |
| rs150018032 | 23 | 70094743 | A  | 20 | 2  | G                     | 0.00005017 |
| rs201334832 | 23 | 70105023 | TG | 17 | 2  | T                     | 0.0004014  |
| rs4524964   | 23 | 70144801 | T  | 14 | 33 | C                     | 0.0007122  |
| rs11291509  | 23 | 70149333 | A  | 14 | 34 | AC                    | 0.0003416  |
| rs5936607   | 23 | 70149404 | C  | 22 | 42 | T                     | 0.0006025  |
| rs62606971  | 23 | 71023406 | A  | 14 | 34 | G                     | 0.0004075  |
| rs376880157 | 23 | 71307811 | T  | 12 | 0  | TTGGGAGGCCGAGGCGGGCTG | 0.0003422  |
| rs202226560 | 23 | 71309707 | C  | 12 | 0  | CA                    | 0.0003422  |
| rs140325071 | 23 | 71325372 | A  | 12 | 0  | G                     | 0.0003422  |
| rs12006827  | 23 | 71337452 | A  | 12 | 0  | G                     | 0.0003422  |
| rs12393772  | 23 | 71341981 | T  | 12 | 0  | C                     | 0.0003422  |
| rs34677932  | 23 | 71342420 | A  | 12 | 0  | AT                    | 0.0003422  |
| rs12388804  | 23 | 71343433 | T  | 12 | 0  | C                     | 0.0003422  |
| rs73565816  | 23 | 71343535 | A  | 12 | 0  | G                     | 0.0003422  |
| rs73565818  | 23 | 71344760 | A  | 12 | 0  | G                     | 0.0003422  |
| rs112253440 | 23 | 71344767 | G  | 12 | 0  | T                     | 0.0003422  |
| rs56290856  | 23 | 78037890 | AT | 52 | 27 | A                     | 0.0005555  |
| rs10909066  | 23 | 78041561 | A  | 52 | 27 | G                     | 0.0005555  |
| rs12559776  | 23 | 78794135 | A  | 47 | 23 | C                     | 0.0007443  |
| rs34858870  | 23 | 78934852 | T  | 28 | 49 | TA                    | 0.0008723  |
| rs6523980   | 23 | 79788147 | T  | 28 | 9  | G                     | 0.0008484  |
| rs77230460  | 23 | 79847201 | A  | 28 | 9  | G                     | 0.0007186  |
| rs147276218 | 23 | 80077905 | G  | 33 | 11 | A                     | 0.0002645  |
| rs143517032 | 23 | 80080225 | A  | 33 | 11 | G                     | 0.0002645  |
| rs199777134 | 23 | 80080622 | CA | 33 | 11 | C                     | 0.0002645  |
| rs6524023   | 23 | 80084448 | G  | 33 | 11 | A                     | 0.0002645  |
| rs5959043   | 23 | 80084885 | A  | 33 | 11 | T                     | 0.0002645  |

|             |    |          |    |    |    |     |           |
|-------------|----|----------|----|----|----|-----|-----------|
| rs12689552  | 23 | 80086115 | G  | 33 | 11 | T   | 0.0002645 |
| rs6524024   | 23 | 80087539 | T  | 33 | 11 | A   | 0.0002645 |
| rs5959044   | 23 | 80092224 | T  | 33 | 11 | G   | 0.0002645 |
| rs6622374   | 23 | 80094000 | C  | 33 | 11 | A   | 0.0002645 |
| rs151000551 | 23 | 80167991 | T  | 18 | 3  | A   | 0.0008121 |
| rs182706350 | 23 | 80717633 | C  | 0  | 10 | T   | 0.0005917 |
| rs149477376 | 23 | 80730143 | T  | 0  | 10 | C   | 0.0005917 |
| rs73237376  | 23 | 81231297 | A  | 1  | 14 | G   | 0.0002433 |
| rs114545707 | 23 | 81312969 | C  | 1  | 14 | A   | 0.0002433 |
| rs142224359 | 23 | 81466433 | A  | 0  | 10 | G   | 0.0005917 |
| rs141990906 | 23 | 81476209 | A  | 0  | 10 | G   | 0.0005917 |
| rs200676876 | 23 | 81657539 | A  | 0  | 10 | ATC | 0.0005917 |
| rs139759794 | 23 | 81810102 | G  | 0  | 10 | C   | 0.0005917 |
| rs143781480 | 23 | 81811216 | G  | 0  | 10 | A   | 0.0005917 |
| rs144543301 | 23 | 81811869 | C  | 0  | 10 | G   | 0.0005917 |
| rs143387505 | 23 | 83620472 | T  | 22 | 4  | C   | 0.0002148 |
| rs140538401 | 23 | 83620619 | T  | 22 | 4  | C   | 0.0002148 |
| rs147071035 | 23 | 83621520 | T  | 22 | 4  | C   | 0.0002148 |
| rs143856395 | 23 | 83621627 | A  | 22 | 4  | T   | 0.0002148 |
| rs146273249 | 23 | 83621636 | T  | 22 | 4  | A   | 0.0002148 |
| rs138146847 | 23 | 83622161 | GA | 22 | 4  | G   | 0.0002148 |
| rs145974824 | 23 | 83622873 | G  | 22 | 4  | A   | 0.0002148 |
| rs151153278 | 23 | 83623294 | A  | 22 | 4  | G   | 0.0002148 |
| rs3788956   | 23 | 83625961 | C  | 22 | 4  | T   | 0.0002148 |
| rs148411370 | 23 | 83626440 | A  | 22 | 4  | G   | 0.0002148 |
| rs2334214   | 23 | 83628018 | C  | 22 | 4  | T   | 0.0002148 |
| rs192217168 | 23 | 83628924 | G  | 22 | 4  | A   | 0.0002148 |
| rs183591666 | 23 | 83629498 | C  | 22 | 4  | T   | 0.0002148 |
| rs186945596 | 23 | 83629499 | A  | 22 | 4  | G   | 0.0002148 |
| rs143850825 | 23 | 83630607 | A  | 22 | 4  | G   | 0.0002148 |
| rs2092545   | 23 | 83631474 | G  | 22 | 4  | A   | 0.0002148 |
| rs141703939 | 23 | 83633235 | A  | 22 | 4  | G   | 0.0002148 |
| rs138684265 | 23 | 83633447 | T  | 22 | 4  | C   | 0.0002148 |
| rs147330459 | 23 | 83634030 | T  | 22 | 4  | C   | 0.0002148 |
| rs149405319 | 23 | 83634197 | C  | 22 | 4  | T   | 0.0002148 |
| rs4828256   | 23 | 83636936 | A  | 22 | 4  | C   | 0.0002148 |
| rs187422740 | 23 | 83641693 | A  | 22 | 4  | T   | 0.0002148 |
| rs191711942 | 23 | 83641694 | T  | 22 | 4  | C   | 0.0002148 |
| rs56997878  | 23 | 83642440 | T  | 22 | 4  | G   | 0.0002148 |
| rs55719627  | 23 | 83643190 | T  | 20 | 4  | G   | 0.000711  |

|             |    |          |      |    |   |     |           |
|-------------|----|----------|------|----|---|-----|-----------|
| rs17219420  | 23 | 83658710 | C    | 22 | 4 | T   | 0.0002148 |
| rs57819529  | 23 | 83661110 | T    | 22 | 4 | C   | 0.0002148 |
| rs138342358 | 23 | 83662421 | G    | 22 | 4 | A   | 0.0002148 |
| rs4828257   | 23 | 83663001 | G    | 22 | 4 | C   | 0.0002148 |
| rs4828258   | 23 | 83663036 | T    | 22 | 4 | C   | 0.0002148 |
| rs4828259   | 23 | 83663206 | A    | 22 | 4 | G   | 0.0002148 |
| rs4828261   | 23 | 83663795 | A    | 22 | 4 | T   | 0.0002148 |
| rs145493356 | 23 | 83664038 | A    | 22 | 4 | G   | 0.0002148 |
| rs199688599 | 23 | 83664225 | G    | 22 | 4 | T   | 0.0002148 |
| rs187724536 | 23 | 83664363 | T    | 22 | 4 | C   | 0.0002148 |
| rs140410819 | 23 | 83664833 | G    | 22 | 4 | A   | 0.0001968 |
| rs201145449 | 23 | 83664893 | T    | 20 | 3 | TA  | 0.0002129 |
| rs7472132   | 23 | 83665880 | A    | 22 | 4 | T   | 0.0002392 |
| rs201940237 | 23 | 83665966 | GTGT | 22 | 4 | G   | 0.0002148 |
| rs4828262   | 23 | 83666425 | A    | 22 | 4 | G   | 0.0002148 |
| rs145723094 | 23 | 83667629 | G    | 22 | 4 | C   | 0.0002148 |
| rs141008163 | 23 | 83668371 | T    | 22 | 4 | G   | 0.0002148 |
| rs56804468  | 23 | 83669036 | A    | 22 | 4 | T   | 0.0002148 |
| rs60588322  | 23 | 83669563 | A    | 22 | 4 | G   | 0.0002148 |
| rs10521367  | 23 | 83669700 | G    | 22 | 4 | A   | 0.0002148 |
| rs146522984 | 23 | 83670042 | T    | 22 | 4 | A   | 0.0002148 |
| rs150161974 | 23 | 83670753 | T    | 22 | 4 | C   | 0.0002148 |
| rs144733150 | 23 | 83672110 | C    | 22 | 4 | T   | 0.0002148 |
| rs140023556 | 23 | 83673499 | T    | 22 | 4 | C   | 0.0001968 |
| rs140301368 | 23 | 83674126 | C    | 22 | 4 | T   | 0.0002148 |
| rs145847877 | 23 | 83674275 | A    | 22 | 4 | G   | 0.0002148 |
| rs182866637 | 23 | 83674562 | G    | 22 | 4 | C   | 0.0002148 |
| rs4828266   | 23 | 83674724 | G    | 22 | 4 | A   | 0.0002148 |
| rs4828267   | 23 | 83674832 | C    | 22 | 4 | G   | 0.0002148 |
| rs148364124 | 23 | 83675747 | A    | 22 | 4 | C   | 0.0002148 |
| rs55943150  | 23 | 83676556 | C    | 22 | 4 | CAA | 0.0002148 |
| rs56251925  | 23 | 83676699 | A    | 22 | 4 | G   | 0.0002102 |
| rs55940001  | 23 | 83677967 | G    | 22 | 4 | T   | 0.0002148 |
| rs56168822  | 23 | 83678021 | T    | 20 | 4 | A   | 0.0003367 |
| rs59392857  | 23 | 83678649 | G    | 22 | 4 | A   | 0.0002148 |
| rs61469178  | 23 | 83678786 | T    | 22 | 4 | C   | 0.0002148 |
| rs61710472  | 23 | 83678935 | C    | 22 | 4 | T   | 0.0002148 |
| rs141423363 | 23 | 83679079 | T    | 22 | 4 | G   | 0.0002148 |
| rs139241696 | 23 | 83679323 | A    | 22 | 4 | G   | 0.0002148 |
| rs147216147 | 23 | 83679799 | G    | 22 | 4 | A   | 0.0002148 |



|             |    |           |     |    |    |    |           |
|-------------|----|-----------|-----|----|----|----|-----------|
| rs2858677   | 23 | 86221003  | G   | 57 | 30 | C  | 0.0005516 |
| rs5969294   | 23 | 86983288  | C   | 2  | 16 | G  | 0.0003115 |
| rs6521963   | 23 | 86983765  | G   | 2  | 16 | A  | 0.0003115 |
| rs5924097   | 23 | 86984262  | C   | 2  | 16 | A  | 0.0003115 |
| rs5924099   | 23 | 86985145  | C   | 2  | 16 | T  | 0.0003115 |
| rs6521964   | 23 | 86987258  | T   | 2  | 16 | C  | 0.0003115 |
| rs5969296   | 23 | 86987339  | G   | 2  | 16 | A  | 0.0003115 |
| rs2988819   | 23 | 90200597  | G   | 24 | 46 | C  | 0.0006257 |
| rs6522514   | 23 | 91548348  | G   | 14 | 1  | A  | 0.0006103 |
| rs6522516   | 23 | 91548566  | G   | 15 | 1  | A  | 0.000299  |
| rs5984170   | 23 | 91557924  | G   | 15 | 1  | A  | 0.0003131 |
| rs5949292   | 23 | 94634026  | C   | 16 | 2  | T  | 0.0007845 |
| rs12844369  | 23 | 96255401  | T   | 0  | 10 | C  | 0.0005917 |
| rs7050867   | 23 | 100686677 | A   | 32 | 12 | G  | 0.0008741 |
| rs7052093   | 23 | 100686721 | T   | 32 | 12 | C  | 0.0008741 |
| rs5951263   | 23 | 100704131 | C   | 28 | 8  | T  | 0.0006347 |
| rs139562096 | 23 | 101097636 | C   | 18 | 3  | G  | 0.0008121 |
| rs77412011  | 23 | 102522169 | A   | 49 | 25 | AG | 0.00085   |
| rs2983089   | 23 | 102535469 | C   | 48 | 24 | T  | 0.0007984 |
| rs2983090   | 23 | 102537062 | A   | 50 | 25 | T  | 0.000499  |
| rs60128102  | 23 | 102537096 | A   | 50 | 26 | AT | 0.0008986 |
| rs2858109   | 23 | 102537485 | T   | 49 | 25 | C  | 0.00085   |
| rs2858108   | 23 | 102537799 | T   | 49 | 25 | C  | 0.00085   |
| rs3015329   | 23 | 102538313 | A   | 49 | 25 | C  | 0.00085   |
| rs146346206 | 23 | 102539527 | G   | 49 | 25 | C  | 0.00085   |
| rs4907884   | 23 | 102540254 | A   | 49 | 25 | G  | 0.00085   |
| rs139345449 | 23 | 102541151 | A   | 18 | 2  | G  | 0.000203  |
| rs2474244   | 23 | 102543595 | G   | 49 | 25 | A  | 0.0004802 |
| rs2756052   | 23 | 102544296 | A   | 49 | 25 | G  | 0.00085   |
| rs2756054   | 23 | 102546270 | A   | 50 | 25 | G  | 0.000499  |
| rs2858106   | 23 | 102550213 | C   | 49 | 25 | T  | 0.00085   |
| rs34815154  | 23 | 102552032 | A   | 49 | 25 | AT | 0.00085   |
| rs5945971   | 23 | 102583405 | T   | 52 | 28 | C  | 0.0009847 |
| rs6621664   | 23 | 102678067 | C   | 48 | 23 | T  | 0.0004351 |
| rs210434    | 23 | 104949928 | G   | 4  | 19 | A  | 0.0005969 |
| rs210439    | 23 | 104959059 | G   | 4  | 19 | A  | 0.0005969 |
| rs3038940   | 23 | 104963739 | TAA | 2  | 15 | T  | 0.000613  |
| rs73636261  | 23 | 104964027 | C   | 4  | 19 | T  | 0.0005969 |
| rs7891511   | 23 | 104973602 | G   | 4  | 19 | T  | 0.0005969 |
| rs5962575   | 23 | 104981504 | C   | 4  | 19 | T  | 0.0005969 |

|             |                         |    |        |            |
|-------------|-------------------------|----|--------|------------|
| rs200458290 | 23 104983337 GATTT      | 4  | 19 G   | 0.0005969  |
| rs10126447  | 23 104988706 G          | 4  | 19 A   | 0.0005969  |
| rs10218388  | 23 104988949 C          | 4  | 19 T   | 0.0005969  |
| rs3764765   | 23 104992963 C          | 4  | 19 T   | 0.0005969  |
| rs5962298   | 23 104993513 G          | 4  | 19 A   | 0.0005969  |
| rs5962579   | 23 104994182 T          | 4  | 19 A   | 0.0005969  |
| rs201435006 | 23 105050984 GT         | 1  | 14 G   | 0.0005996  |
| rs78553510  | 23 105268812 C          | 1  | 14 CT  | 0.0002759  |
| rs5916754   | 23 105455775 T          | 24 | 6 C    | 0.0005592  |
| rs150724424 | 23 109752418 A          | 11 | 0 G    | 0.0007274  |
| rs141911700 | 23 109770433 G          | 12 | 0 A    | 0.0003422  |
| X:109846096 | 23 109846096 T          | 12 | 0 C    | 0.0003422  |
| rs149294490 | 23 109887848 G          | 12 | 0 A    | 0.0003422  |
| rs141590782 | 23 110212107 A          | 11 | 0 G    | 0.0007274  |
| rs16986748  | 23 111286093 G          | 1  | 12 A   | 0.0009301  |
| rs7054642   | 23 111289482 T          | 1  | 12 C   | 0.0009301  |
| rs7878779   | 23 111292662 T          | 1  | 14 C   | 0.0002433  |
| rs60744336  | 23 111311333 G          | 0  | 10 A   | 0.0005917  |
| rs16986963  | 23 111647953 A          | 11 | 0 G    | 0.0007274  |
| rs5946287   | 23 114396657 A          | 2  | 15 T   | 0.0006243  |
| rs59067332  | 23 114723192 C          | 37 | 15 T   | 0.0009053  |
| rs73577794  | 23 114724262 T          | 37 | 11 G   | 0.00007658 |
| rs73577800  | 23 114725164 A          | 37 | 15 G   | 0.0009053  |
| rs2895154   | 23 114725960 G          | 36 | 13 T   | 0.0003885  |
| rs988456    | 23 115659164 A          | 56 | 29 G   | 0.0001959  |
| rs139721366 | 23 115661289 T          | 56 | 29 G   | 0.0001959  |
| rs1013220   | 23 115662445 T          | 56 | 29 C   | 0.0001959  |
| rs5905338   | 23 115663534 T          | 56 | 29 C   | 0.0001959  |
| rs5905342   | 23 115664640 G          | 56 | 29 A   | 0.0001959  |
| rs6651577   | 23 115665691 G          | 56 | 29 A   | 0.0001959  |
| rs5905343   | 23 115666144 C          | 56 | 29 T   | 0.0001959  |
| rs5905211   | 23 115666246 T          | 56 | 29 C   | 0.0001959  |
| rs5905346   | 23 115667761 T          | 56 | 29 C   | 0.0001959  |
| rs6608698   | 23 115668322 C          | 56 | 29 T   | 0.0001959  |
| rs6608699   | 23 115669288 G          | 56 | 29 A   | 0.0001959  |
| rs4145420   | 23 115670754 G          | 56 | 29 A   | 0.0001959  |
| rs6608527   | 23 115670779 C          | 56 | 29 G   | 0.0001959  |
| rs5905347   | 23 115671758 T          | 56 | 28 C   | 0.0001045  |
| X:115672688 | 23 115672688 T          | 56 | 29 TTC | 0.0001959  |
| X:115672692 | 23 115672692 CAAATTAGAG | 56 | 29 C   | 0.0001959  |

|             |                            |    |        |            |
|-------------|----------------------------|----|--------|------------|
| X:115672695 | 23 115672695 TGACAAATTGACA | 56 | 29 T   | 0.0001959  |
| rs2187881   | 23 115673376 T             | 56 | 29 A   | 0.0001959  |
| rs2157427   | 23 115673454 G             | 55 | 27 A   | 0.0001689  |
| rs5905348   | 23 115675146 T             | 56 | 29 C   | 0.0001959  |
| rs11260159  | 23 115734350 T             | 56 | 29 C   | 0.0001959  |
| rs9329406   | 23 115740985 A             | 29 | 52 G   | 0.0002991  |
| rs9780253   | 23 115741598 C             | 56 | 27 A   | 0.00005419 |
| rs12390117  | 23 115743813 G             | 56 | 27 A   | 0.00005419 |
| rs11260106  | 23 115744144 C             | 56 | 27 T   | 0.00005419 |
| rs11260118  | 23 115744897 C             | 56 | 27 T   | 0.00005419 |
| rs11260121  | 23 115745642 C             | 56 | 27 T   | 0.00005419 |
| rs6655546   | 23 115747311 T             | 56 | 27 C   | 0.00005419 |
| rs11260135  | 23 115747885 G             | 56 | 27 A   | 0.00005419 |
| rs112534898 | 23 115747924 G             | 56 | 27 GAT | 0.00005419 |
| rs12834189  | 23 115748233 A             | 56 | 27 G   | 0.00005419 |
| rs12837027  | 23 115748364 C             | 56 | 27 T   | 0.00005419 |
| rs200565252 | 23 115749377 G             | 56 | 27 GA  | 0.00005419 |
| rs11260148  | 23 115749542 C             | 56 | 27 A   | 0.00005419 |
| rs11260149  | 23 115749593 A             | 56 | 27 C   | 0.00005419 |
| rs11260150  | 23 115749818 G             | 56 | 27 A   | 0.00005419 |
| rs11260151  | 23 115749920 A             | 56 | 27 G   | 0.00005419 |
| rs12398681  | 23 115750080 C             | 56 | 27 T   | 0.00005419 |
| rs12398711  | 23 115750294 G             | 56 | 27 T   | 0.00005419 |
| rs28441538  | 23 115750497 A             | 32 | 57 G   | 0.00009501 |
| rs66834529  | 23 115751442 C             | 56 | 27 T   | 0.00005419 |
| rs73226865  | 23 115751478 A             | 56 | 27 T   | 0.00005419 |
| rs11260156  | 23 115752193 A             | 56 | 27 T   | 0.00005419 |
| rs12398615  | 23 115752926 T             | 56 | 27 C   | 0.00005419 |
| rs10907033  | 23 115753053 G             | 56 | 27 A   | 0.00005419 |
| rs10907034  | 23 115753283 G             | 56 | 27 C   | 0.00005419 |
| rs10907035  | 23 115753330 A             | 56 | 27 G   | 0.00005419 |
| rs10796347  | 23 115753621 C             | 56 | 27 T   | 0.00005419 |
| rs11260172  | 23 115755324 C             | 58 | 28 T   | 0.00005205 |
| rs12400026  | 23 115755656 A             | 34 | 56 T   | 0.0005669  |
| rs12557454  | 23 115756177 T             | 34 | 56 C   | 0.0005669  |
| rs74574712  | 23 115756248 TA            | 34 | 56 T   | 0.0005669  |
| rs73213286  | 23 115756372 C             | 34 | 56 A   | 0.0005669  |
| rs12398361  | 23 115757430 G             | 23 | 44 A   | 0.0006657  |
| rs6603394   | 23 115757476 G             | 45 | 21 A   | 0.0006315  |
| rs12400045  | 23 115758626 A             | 23 | 44 G   | 0.0006657  |

|             |                |    |          |             |
|-------------|----------------|----|----------|-------------|
| rs7059336   | 23 115762843 T | 56 | 27 C     | 0.00005419  |
| rs7049926   | 23 115762854 A | 56 | 27 G     | 0.00005419  |
| rs12835373  | 23 115764107 C | 23 | 44 T     | 0.0006657   |
| rs12853107  | 23 115764937 C | 58 | 28 T     | 0.00002988  |
| rs7473283   | 23 115766722 A | 16 | 35 T     | 0.000956    |
| rs10658209  | 23 115769642 G | 56 | 27 GAT   | 0.00005419  |
| rs7473627   | 23 115774190 T | 15 | 35 C     | 0.0004795   |
| rs7391753   | 23 115774601 T | 58 | 28 C     | 0.00002988  |
| rs12398148  | 23 115778720 A | 15 | 35 C     | 0.0004795   |
| rs12847918  | 23 115780825 A | 15 | 35 G     | 0.0004795   |
| rs12853855  | 23 115780844 T | 15 | 35 C     | 0.0004795   |
| rs12559419  | 23 115781639 C | 26 | 51 T     | 0.00008049  |
| rs12395694  | 23 115781926 C | 27 | 51 T     | 0.0001548   |
| rs199692781 | 23 115782112 T | 28 | 52 TAATA | 0.0001612   |
| rs62605741  | 23 115782964 C | 27 | 52 T     | 0.00008446  |
| rs12398468  | 23 115784630 T | 26 | 51 C     | 0.00008049  |
| rs11260345  | 23 115786229 G | 28 | 51 T     | 0.0002892   |
| rs12395202  | 23 115786761 T | 56 | 27 C     | 0.00005419  |
| rs5910167   | 23 115787601 T | 27 | 51 G     | 0.0001548   |
| rs5910166   | 23 115787761 A | 26 | 51 G     | 0.00008049  |
| rs5912057   | 23 115788011 G | 26 | 51 C     | 0.00008049  |
| rs34307386  | 23 115788942 A | 27 | 51 G     | 0.0001548   |
| rs5912030   | 23 115792853 A | 58 | 28 G     | 0.00002988  |
| rs5912025   | 23 115794587 A | 45 | 21 G     | 0.0006315   |
| rs7057172   | 23 115797756 A | 60 | 28 G     | 0.000007795 |
| rs1506960   | 23 115798129 T | 60 | 28 C     | 0.000007795 |
| rs5956740   | 23 115799907 C | 60 | 28 G     | 0.000007795 |
| rs1506958   | 23 115803356 C | 22 | 44 T     | 0.0003557   |
| rs5903481   | 23 115803731 T | 47 | 21 TTATC | 0.000209    |
| rs113858028 | 23 115806047 A | 47 | 21 ATGT  | 0.000209    |
| rs5911731   | 23 115807323 T | 60 | 28 C     | 0.000007795 |
| rs1395554   | 23 115808095 T | 22 | 44 G     | 0.0003557   |
| rs11798535  | 23 115808182 C | 22 | 44 G     | 0.0003557   |
| rs1354799   | 23 115808840 T | 22 | 44 G     | 0.0003557   |
| rs12395259  | 23 115810023 G | 22 | 44 A     | 0.0003557   |
| rs7473168   | 23 115810825 C | 22 | 44 T     | 0.0003557   |
| rs7473986   | 23 115811177 C | 22 | 44 T     | 0.0003557   |
| rs28581957  | 23 115811962 G | 22 | 44 C     | 0.0003557   |
| rs2335018   | 23 115812234 C | 22 | 44 T     | 0.0003557   |
| rs3965555   | 23 115812261 C | 22 | 44 A     | 0.0003557   |

|             |                 |    |                        |             |
|-------------|-----------------|----|------------------------|-------------|
| rs369242479 | 23 115813360 T  | 1  | 13 C                   | 0.0005677   |
| rs34339026  | 23 115816699 C  | 28 | 56 CT                  | 0.000007955 |
| rs5909877   | 23 115825960 G  | 49 | 23 A                   | 0.0002495   |
| rs202023623 | 23 115826705 GT | 4  | 20 G                   | 0.0003114   |
| rs1876296   | 23 115827591 C  | 49 | 23 G                   | 0.0002495   |
| rs1876297   | 23 115827794 A  | 3  | 19 G                   | 0.0001662   |
| rs147251870 | 23 115984992 C  | 14 | 1 T                    | 0.0006677   |
| rs137995500 | 23 116090158 C  | 14 | 1 T                    | 0.0006347   |
| X:116415994 | 23 116415994 C  | 21 | 4 T                    | 0.000448    |
| rs1230835   | 23 117318970 A  | 10 | 30 G                   | 0.0002669   |
| rs57114393  | 23 117319283 A  | 10 | 28 AGTGGGGAAAAAAGAAAAT | 0.0008979   |
| rs2682987   | 23 117322365 G  | 10 | 28 A                   | 0.000853    |
| rs2683008   | 23 117324955 C  | 10 | 28 A                   | 0.000853    |
| rs139144471 | 23 117829694 G  | 17 | 2 T                    | 0.0004014   |
| rs4825655   | 23 118721419 G  | 24 | 45 A                   | 0.0007128   |
| rs139282281 | 23 118758234 A  | 11 | 0 G                    | 0.0007086   |
| rs6603602   | 23 119338274 C  | 42 | 19 G                   | 0.0008809   |
| rs5909724   | 23 119619770 C  | 18 | 3 G                    | 0.0008121   |
| rs11314157  | 23 119917765 T  | 43 | 20 TA                  | 0.0009741   |
| rs5909763   | 23 119918392 G  | 43 | 20 A                   | 0.0009741   |
| rs5957482   | 23 119918735 G  | 43 | 20 T                   | 0.0009741   |
| rs5909764   | 23 119919126 A  | 43 | 20 C                   | 0.0009741   |
| rs5956304   | 23 120465431 A  | 20 | 4 G                    | 0.0007606   |
| rs10482505  | 23 120466128 C  | 20 | 4 A                    | 0.0007606   |
| rs6648591   | 23 120469471 C  | 20 | 4 T                    | 0.0007606   |
| rs6649201   | 23 120471336 G  | 22 | 4 T                    | 0.0002148   |
| rs6648601   | 23 120476218 A  | 20 | 4 G                    | 0.0007606   |
| rs5957660   | 23 120477020 A  | 20 | 4 G                    | 0.0007606   |
| rs10429756  | 23 120478777 G  | 20 | 4 A                    | 0.0007606   |
| rs5956305   | 23 120479248 C  | 20 | 4 G                    | 0.0007606   |
| rs6648605   | 23 120482339 G  | 20 | 4 C                    | 0.0007606   |
| rs6648606   | 23 120482340 T  | 20 | 4 G                    | 0.0007606   |
| rs73631065  | 23 120486850 A  | 20 | 4 G                    | 0.0007606   |
| rs6648611   | 23 120489819 C  | 20 | 4 T                    | 0.000828    |
| rs73631088  | 23 120492945 G  | 20 | 4 C                    | 0.0007606   |
| rs12687916  | 23 120493218 T  | 20 | 4 G                    | 0.000828    |
| rs5957689   | 23 120494229 G  | 20 | 4 A                    | 0.0007606   |
| rs5956318   | 23 120497263 C  | 20 | 4 G                    | 0.0007606   |
| rs12396010  | 23 120502315 T  | 20 | 4 C                    | 0.0007606   |
| rs1351454   | 23 121521935 A  | 20 | 40 G                   | 0.0008835   |

|             |                        |    |           |            |
|-------------|------------------------|----|-----------|------------|
| rs7884179   | 23 121522338 T         | 20 | 40 C      | 0.0008835  |
| rs5911308   | 23 121523310 C         | 20 | 40 A      | 0.0008835  |
| rs5958012   | 23 121524744 A         | 18 | 40 G      | 0.0003958  |
| rs58439862  | 23 121526326 G         | 20 | 40 GA     | 0.0008835  |
| rs1585954   | 23 121528162 A         | 20 | 40 G      | 0.0008835  |
| rs202026185 | 23 121529094 C         | 20 | 40 T      | 0.000791   |
| rs1988741   | 23 121532885 A         | 20 | 40 G      | 0.0008835  |
| rs62594887  | 23 121533258 G         | 20 | 40 T      | 0.0008835  |
| rs11796035  | 23 121534107 A         | 20 | 40 C      | 0.0008835  |
| rs1481179   | 23 121536593 A         | 20 | 40 G      | 0.0008835  |
| rs5911314   | 23 121537051 C         | 20 | 40 T      | 0.0008835  |
| rs13440620  | 23 121538717 T         | 20 | 40 C      | 0.0008835  |
| rs5911315   | 23 121539373 T         | 20 | 40 A      | 0.0008835  |
| rs1351453   | 23 121540546 T         | 20 | 40 G      | 0.0008835  |
| rs2199957   | 23 121546704 C         | 20 | 41 T      | 0.0005156  |
| rs11260371  | 23 121546991 C         | 20 | 41 T      | 0.0005156  |
| rs2840663   | 23 121562938 G         | 15 | 40 A      | 0.00004144 |
| rs4825452   | 23 121565186 G         | 18 | 41 T      | 0.0001308  |
| rs3761557   | 23 122315469 T         | 15 | 35 C      | 0.0004795  |
| rs34786936  | 23 122573644 C         | 3  | 17 CT     | 0.0006979  |
| rs199426    | 23 123131239 G         | 19 | 3 A       | 0.0004265  |
| rs112913630 | 23 123192419 T         | 20 | 3 A       | 0.0002211  |
| rs35941521  | 23 123208682 C         | 22 | 3 T       | 0.00005724 |
| rs1279794   | 23 123324050 T         | 6  | 22 C      | 0.0007921  |
| rs58030679  | 23 123325170 CACACACAT | 6  | 22 C      | 0.0007921  |
| rs76652059  | 23 123325634 C         | 6  | 22 CT     | 0.0007921  |
| rs1279796   | 23 123326007 C         | 6  | 22 G      | 0.0007921  |
| rs72155652  | 23 123326867 G         | 6  | 22 GCC    | 0.0007921  |
| rs72059681  | 23 123326870 T         | 6  | 22 TCCGCA | 0.0007921  |
| rs1279799   | 23 123327156 T         | 6  | 22 G      | 0.0007921  |
| rs1279800   | 23 123327486 T         | 6  | 22 C      | 0.0007921  |
| rs1279801   | 23 123327934 G         | 6  | 22 A      | 0.0007921  |
| rs1279802   | 23 123327963 C         | 6  | 22 T      | 0.0007921  |
| rs1279803   | 23 123328193 T         | 6  | 22 C      | 0.0007921  |
| rs988930    | 23 123328406 A         | 6  | 22 G      | 0.0007921  |
| rs79001586  | 23 123329157 CT        | 6  | 22 C      | 0.0007921  |
| rs1279807   | 23 123329635 T         | 6  | 22 C      | 0.0007921  |
| rs1279808   | 23 123329909 G         | 6  | 22 A      | 0.0007921  |
| rs1279810   | 23 123332593 C         | 6  | 22 A      | 0.0007921  |
| rs3126134   | 23 124547784 C         | 17 | 37 T      | 0.0006349  |

|             |                  |    |              |            |
|-------------|------------------|----|--------------|------------|
| rs35336134  | 23 124549116 AT  | 18 | 38 A         | 0.0007166  |
| rs3126133   | 23 124552884 C   | 18 | 38 A         | 0.0007166  |
| rs3101167   | 23 124556706 G   | 18 | 38 A         | 0.0007166  |
| rs3126129   | 23 124561259 A   | 17 | 38 G         | 0.0003648  |
| rs3101137   | 23 124572254 A   | 13 | 32 G         | 0.0009401  |
| rs3101139   | 23 124573867 A   | 13 | 32 G         | 0.0009401  |
| rs3126296   | 23 124574101 G   | 13 | 32 A         | 0.0009401  |
| rs3126297   | 23 124574107 G   | 13 | 32 A         | 0.0009401  |
| rs1903090   | 23 124574330 G   | 13 | 32 A         | 0.0009401  |
| rs1903091   | 23 124574487 T   | 13 | 32 C         | 0.0009401  |
| rs1903092   | 23 124574488 G   | 13 | 32 A         | 0.0009401  |
| rs3126302   | 23 124577099 C   | 13 | 32 T         | 0.0009401  |
| rs35532723  | 23 124577621 TAC | 13 | 32 T         | 0.0009401  |
| rs5930020   | 23 124577901 C   | 11 | 32 T         | 0.000192   |
| rs61536326  | 23 127751810 T   | 21 | 41 C         | 0.0009669  |
| rs2027843   | 23 127758031 T   | 21 | 45 C         | 0.0001015  |
| rs648       | 23 127764381 T   | 21 | 45 C         | 0.0001015  |
| rs5932468   | 23 127765609 C   | 21 | 45 T         | 0.0001015  |
| rs5930270   | 23 127776026 A   | 21 | 45 G         | 0.0001015  |
| rs5930271   | 23 127777221 A   | 21 | 45 G         | 0.0001015  |
| rs10528606  | 23 127778933 A   | 26 | 49 AAAACAAAC | 0.0004462  |
| rs148044293 | 23 132414633 A   | 43 | 15 G         | 0.00002703 |
| rs2073051   | 23 132473645 A   | 12 | 31 G         | 0.0007705  |
| rs139859148 | 23 133515780 T   | 24 | 5 C          | 0.0001934  |
| rs2807261   | 23 135661799 C   | 24 | 5 T          | 0.0001934  |
| rs2518882   | 23 135662054 A   | 24 | 5 G          | 0.0001934  |
| rs2807263   | 23 135663181 C   | 24 | 5 G          | 0.0001934  |
| rs2807264   | 23 135665778 C   | 24 | 5 A          | 0.0001934  |
| rs2807266   | 23 135666415 T   | 24 | 5 G          | 0.0001934  |
| rs2807267   | 23 135666453 T   | 24 | 5 G          | 0.0001934  |
| rs34891204  | 23 135666576 TC  | 24 | 5 T          | 0.0001748  |
| rs2807257   | 23 135666848 A   | 24 | 6 G          | 0.0005592  |
| rs2518883   | 23 135666923 T   | 24 | 5 C          | 0.0001934  |
| rs2807258   | 23 135668903 A   | 24 | 5 G          | 0.0001934  |
| rs2518885   | 23 135668988 A   | 24 | 5 C          | 0.0001934  |
| rs2518886   | 23 135670593 T   | 24 | 5 C          | 0.0001934  |
| rs12852548  | 23 135670824 A   | 24 | 5 T          | 0.0001934  |
| rs2807259   | 23 135671221 A   | 24 | 5 G          | 0.0001934  |
| rs2807260   | 23 135674044 A   | 25 | 5 C          | 0.00009108 |
| rs2518888   | 23 135674388 C   | 25 | 5 T          | 0.000102   |

|             |                    |    |          |             |
|-------------|--------------------|----|----------|-------------|
| rs2518889   | 23 135674543 A     | 25 | 5 T      | 0.0001169   |
| rs2518891   | 23 135675755 C     | 25 | 5 T      | 0.000102    |
| rs144807293 | 23 135676651 CACTT | 25 | 5 C      | 0.000102    |
| rs2518892   | 23 135676896 T     | 25 | 5 C      | 0.000102    |
| rs2518893   | 23 135677559 T     | 25 | 5 A      | 0.000102    |
| rs2518894   | 23 135677710 C     | 25 | 5 T      | 0.000102    |
| rs2518895   | 23 135678840 A     | 25 | 5 G      | 0.000102    |
| rs2518896   | 23 135679053 A     | 25 | 5 G      | 0.0001169   |
| rs2518897   | 23 135679059 A     | 25 | 5 G      | 0.0001169   |
| rs2518899   | 23 135679631 A     | 25 | 5 G      | 0.000102    |
| rs2518900   | 23 135679960 G     | 25 | 5 C      | 0.000102    |
| rs2518901   | 23 135680078 T     | 25 | 5 G      | 0.000102    |
| rs2518902   | 23 135680774 G     | 25 | 5 C      | 0.000102    |
| rs12556398  | 23 135680970 A     | 25 | 5 G      | 0.0001169   |
| rs2518903   | 23 135681110 C     | 25 | 5 T      | 0.000102    |
| rs2518904   | 23 135681823 A     | 23 | 5 G      | 0.0003539   |
| rs12007112  | 23 135682887 C     | 26 | 7 T      | 0.0004518   |
| rs12012220  | 23 135683355 T     | 25 | 5 C      | 0.000102    |
| rs12012314  | 23 135683500 A     | 25 | 5 G      | 0.000102    |
| rs73228703  | 23 135683508 G     | 25 | 5 T      | 0.000102    |
| rs12848318  | 23 135684162 A     | 25 | 5 C      | 0.000102    |
| rs12559890  | 23 135685169 A     | 25 | 5 C      | 0.000102    |
| rs12014670  | 23 135685563 A     | 25 | 5 C      | 0.000102    |
| rs12556784  | 23 135687009 G     | 26 | 7 A      | 0.0004518   |
| rs12559116  | 23 135687540 C     | 26 | 7 T      | 0.0004518   |
| rs3043322   | 23 135689151 A     | 26 | 7 ATTTTG | 0.0004518   |
| rs518667    | 23 138077510 C     | 0  | 15 T     | 0.0000112   |
| rs78974273  | 23 138079591 A     | 0  | 15 AC    | 0.0000112   |
| rs579260    | 23 138086137 T     | 0  | 15 C     | 0.0000112   |
| rs471635    | 23 138086434 A     | 0  | 15 C     | 0.00001334  |
| rs500096    | 23 138087155 G     | 0  | 15 C     | 0.0000112   |
| rs565127    | 23 138088701 C     | 0  | 15 T     | 0.0000112   |
| rs5931554   | 23 138091869 C     | 2  | 15 T     | 0.0006952   |
| rs472273    | 23 138097159 G     | 0  | 15 C     | 0.0000112   |
| rs2179589   | 23 138097310 G     | 0  | 15 A     | 0.0000112   |
| rs566187    | 23 138098674 A     | 0  | 15 T     | 0.0000112   |
| rs496732    | 23 138099648 T     | 0  | 15 C     | 0.000009157 |
| rs490787    | 23 138100179 G     | 0  | 15 A     | 0.0000112   |
| rs512809    | 23 138101612 C     | 0  | 15 A     | 0.0000112   |
| rs471600    | 23 138101814 G     | 0  | 15 A     | 0.0000112   |



|             |                 |   |               |            |
|-------------|-----------------|---|---------------|------------|
| rs482328    | 23 138102649 C  | 0 | 15 T          | 0.0000112  |
| rs483419    | 23 138105978 C  | 0 | 15 T          | 0.0000112  |
| rs497635    | 23 138106122 T  | 0 | 15 G          | 0.0000112  |
| rs578264    | 23 138107101 C  | 0 | 15 T          | 0.0000112  |
| rs515444    | 23 138107138 G  | 0 | 15 A          | 0.0000112  |
| rs519841    | 23 138108803 C  | 0 | 15 T          | 0.0000112  |
| rs149173046 | 23 138110078 C  | 0 | 15 CAAGA      | 0.0000112  |
| rs693310    | 23 138110176 C  | 0 | 15 T          | 0.0000112  |
| rs5931560   | 23 138110307 A  | 0 | 15 G          | 0.0000112  |
| rs526093    | 23 138111126 G  | 0 | 15 A          | 0.0000112  |
| rs477821    | 23 138111932 A  | 0 | 15 G          | 0.0000112  |
| rs6635762   | 23 138113107 A  | 0 | 15 G          | 0.0000112  |
| rs67703366  | 23 138113374 CA | 0 | 15 C          | 0.0000112  |
| rs79440397  | 23 138113382 A  | 0 | 15 T          | 0.0000112  |
| rs6634041   | 23 138113909 C  | 0 | 13 A          | 0.00004715 |
| rs17001950  | 23 138114091 G  | 0 | 15 C          | 0.0000112  |
| rs60643249  | 23 138114217 A  | 0 | 15 G          | 0.0000112  |
| rs62602197  | 23 138114331 A  | 0 | 15 G          | 0.0000112  |
| rs61245857  | 23 138114383 G  | 0 | 15 A          | 0.0000112  |
| rs6634042   | 23 138114720 C  | 0 | 15 A          | 0.0000112  |
| rs7884030   | 23 138115512 C  | 0 | 15 T          | 0.0000112  |
| rs7883424   | 23 138115569 A  | 0 | 15 G          | 0.0000112  |
| rs17001957  | 23 138116229 C  | 0 | 15 A          | 0.0000112  |
| rs62602201  | 23 138116536 A  | 0 | 15 G          | 0.0000112  |
| rs62602202  | 23 138117015 C  | 0 | 15 T          | 0.0000112  |
| rs16993529  | 23 138117256 T  | 0 | 15 C          | 0.0000112  |
| rs10521792  | 23 138117409 G  | 0 | 15 A          | 0.0000112  |
| rs17001960  | 23 138119216 A  | 0 | 15 T          | 0.0000112  |
| rs62602203  | 23 138119644 C  | 0 | 15 A          | 0.0000112  |
| rs62602204  | 23 138119702 A  | 0 | 15 T          | 0.0000112  |
| rs112015472 | 23 138119748 A  | 0 | 15 T          | 0.0000112  |
| rs7889036   | 23 138119874 T  | 0 | 15 A          | 0.0000112  |
| rs62602205  | 23 138120458 A  | 0 | 15 G          | 0.0000112  |
| rs12558011  | 23 138120702 T  | 0 | 15 A          | 0.0000112  |
| rs12556537  | 23 138120938 C  | 0 | 15 T          | 0.0000112  |
| rs17001963  | 23 138122394 T  | 0 | 15 G          | 0.0000112  |
| rs62602208  | 23 138126601 C  | 0 | 15 A          | 0.0000112  |
| rs62602209  | 23 138127036 G  | 0 | 15 A          | 0.0000112  |
| rs2103610   | 23 138127481 A  | 0 | 15 G          | 0.0000112  |
| rs112592286 | 23 138128310 C  | 0 | 15 CCTCAGGAAG | 0.0000112  |

|             |                 |   |         |            |
|-------------|-----------------|---|---------|------------|
| rs62602236  | 23 138128358 A  | 0 | 15 G    | 0.0000112  |
| rs12560172  | 23 138130418 C  | 0 | 15 T    | 0.0000112  |
| rs62602238  | 23 138130921 C  | 0 | 15 T    | 0.0000112  |
| rs62602239  | 23 138133918 G  | 0 | 15 T    | 0.0000112  |
| rs62602240  | 23 138134536 G  | 0 | 15 A    | 0.0000112  |
| rs62602241  | 23 138134795 T  | 0 | 15 C    | 0.0000112  |
| rs1080166   | 23 138137774 C  | 0 | 15 T    | 0.0000112  |
| rs62602242  | 23 138140150 C  | 0 | 15 T    | 0.0000112  |
| rs7877464   | 23 138140408 G  | 0 | 15 A    | 0.0000112  |
| rs12556549  | 23 138140736 T  | 0 | 15 G    | 0.0000112  |
| rs62602243  | 23 138142110 A  | 0 | 15 G    | 0.0000112  |
| rs374366794 | 23 138143770 A  | 0 | 15 AT   | 0.0000112  |
| rs113373639 | 23 138144111 C  | 0 | 15 CTTA | 0.0000112  |
| rs143453100 | 23 138147525 C  | 0 | 12 T    | 0.0001058  |
| rs62602246  | 23 138148857 A  | 0 | 14 G    | 0.00002513 |
| rs62602247  | 23 138150491 C  | 0 | 10 T    | 0.0004558  |
| rs138951453 | 23 138152160 C  | 0 | 15 T    | 0.0000112  |
| rs141403534 | 23 138152804 A  | 0 | 14 G    | 0.00002513 |
| rs147006243 | 23 138152877 T  | 0 | 14 C    | 0.00002513 |
| rs112600886 | 23 138154239 A  | 0 | 15 G    | 0.0000112  |
| rs112886945 | 23 138155295 T  | 0 | 14 TC   | 0.00002513 |
| rs201924524 | 23 138155299 G  | 0 | 14 C    | 0.00002513 |
| rs10521793  | 23 138156505 T  | 0 | 14 C    | 0.00002513 |
| rs17284663  | 23 138160456 T  | 0 | 14 A    | 0.00002513 |
| rs17331408  | 23 138160576 C  | 0 | 14 T    | 0.00002513 |
| rs112249167 | 23 138161557 A  | 0 | 14 AC   | 0.00002513 |
| rs62603179  | 23 138166155 G  | 0 | 15 A    | 0.0000112  |
| rs62603180  | 23 138177022 T  | 0 | 15 C    | 0.0000112  |
| rs7890667   | 23 138178531 A  | 0 | 14 G    | 0.00002513 |
| rs62603183  | 23 138179958 G  | 0 | 14 C    | 0.00002513 |
| rs111506647 | 23 138181040 C  | 0 | 12 T    | 0.0001058  |
| rs7884308   | 23 138182426 A  | 0 | 14 G    | 0.00002513 |
| rs7888266   | 23 138182784 T  | 0 | 14 G    | 0.00002513 |
| rs62603185  | 23 138183067 G  | 0 | 15 A    | 0.00001334 |
| rs2206125   | 23 138185215 T  | 0 | 14 C    | 0.00002513 |
| rs111519164 | 23 138185531 A  | 0 | 14 G    | 0.00002513 |
| rs17001986  | 23 138186360 C  | 0 | 12 G    | 0.0001058  |
| rs62603187  | 23 138186858 T  | 0 | 14 C    | 0.00002513 |
| rs199795206 | 23 138187174 GT | 0 | 11 G    | 0.0002032  |
| rs17331422  | 23 138187934 G  | 0 | 15 A    | 0.0000112  |

|             |                    |    |           |            |
|-------------|--------------------|----|-----------|------------|
| rs979128    | 23 138188114 C     | 0  | 15 A      | 0.0000112  |
| rs41300307  | 23 138188496 A     | 0  | 14 G      | 0.00002513 |
| rs201138057 | 23 138189171 C     | 0  | 11 CT     | 0.0002715  |
| rs200196785 | 23 138189174 A     | 0  | 11 T      | 0.0002715  |
| rs17284670  | 23 138198382 C     | 0  | 12 T      | 0.0001237  |
| rs5976277   | 23 138201343 G     | 0  | 11 A      | 0.0002715  |
| rs5976278   | 23 138201602 G     | 0  | 12 A      | 0.0001237  |
| rs62603211  | 23 138203325 G     | 0  | 10 C      | 0.0005917  |
| rs7884407   | 23 138203555 G     | 0  | 10 T      | 0.0005917  |
| rs62603212  | 23 138203581 T     | 0  | 10 A      | 0.0005917  |
| rs2227059   | 23 138236904 C     | 26 | 47 T      | 0.0007993  |
| rs74657155  | 23 139874134 TC    | 0  | 11 T      | 0.0002715  |
| rs78879113  | 23 139875692 TTCTC | 0  | 11 T      | 0.0002715  |
| rs55877737  | 23 139876177 CT    | 0  | 11 C      | 0.0002715  |
| rs1006861   | 23 141304473 T     | 12 | 33 G      | 0.0002456  |
| rs1883397   | 23 141308325 C     | 12 | 35 T      | 0.00007325 |
| rs62600825  | 23 141963178 T     | 30 | 10 C      | 0.0006347  |
| rs7878290   | 23 142421475 C     | 9  | 27 T      | 0.000654   |
| rs7881609   | 23 142422021 A     | 9  | 27 G      | 0.000654   |
| rs57173964  | 23 142426750 G     | 9  | 27 A      | 0.000654   |
| rs200143228 | 23 142427183 T     | 9  | 27 TTCC   | 0.000654   |
| rs7889524   | 23 142429074 T     | 9  | 27 C      | 0.000654   |
| rs67474692  | 23 142430116 A     | 9  | 27 G      | 0.000654   |
| rs199822404 | 23 142430337 A     | 9  | 27 AT     | 0.000654   |
| rs67893966  | 23 142430401 G     | 9  | 27 A      | 0.000654   |
| rs74769907  | 23 143200302 C     | 43 | 17 T      | 0.00006761 |
| rs77429583  | 23 143200330 G     | 43 | 17 T      | 0.000129   |
| rs77311884  | 23 144119425 C     | 12 | 0 T       | 0.0003422  |
| rs62598640  | 23 144120361 G     | 12 | 0 A       | 0.0003422  |
| rs143406498 | 23 144120430 C     | 12 | 0 A       | 0.0003422  |
| rs62598643  | 23 144121141 G     | 12 | 0 C       | 0.0003422  |
| rs142573764 | 23 144121641 G     | 12 | 0 T       | 0.0003422  |
| rs148321100 | 23 144122981 T     | 12 | 0 C       | 0.0003422  |
| rs62598644  | 23 144123298 T     | 12 | 0 C       | 0.0003422  |
| rs201153231 | 23 144124658 A     | 12 | 0 AAGAGAG | 0.0003422  |
| rs149379606 | 23 144125365 T     | 12 | 0 C       | 0.0003422  |
| X:144125922 | 23 144125922 C     | 12 | 0 G       | 0.0003422  |
| X:144126802 | 23 144126802 G     | 12 | 0 A       | 0.0003422  |
| rs62600167  | 23 144127770 T     | 12 | 0 C       | 0.0003422  |
| rs62600169  | 23 144129067 G     | 12 | 0 A       | 0.0003422  |

|             |                 |    |           |            |
|-------------|-----------------|----|-----------|------------|
| rs7064720   | 23 144129334 T  | 12 | 0 G       | 0.0003422  |
| rs62600170  | 23 144130622 G  | 12 | 0 A       | 0.0003422  |
| rs62600171  | 23 144133012 C  | 12 | 0 T       | 0.0003422  |
| rs58284834  | 23 144133144 A  | 12 | 0 G       | 0.0003422  |
| rs202110064 | 23 144136355 G  | 12 | 0 GTGTA   | 0.0003315  |
| rs202055875 | 23 144144189 C  | 12 | 0 CAT     | 0.0003422  |
| rs200055114 | 23 144145183 A  | 12 | 0 AAAAT   | 0.0003422  |
| rs62600181  | 23 144145918 C  | 12 | 0 T       | 0.0003422  |
| rs62600183  | 23 144146627 A  | 12 | 0 G       | 0.0003422  |
| rs62600218  | 23 144171602 A  | 11 | 0 T       | 0.0007274  |
| rs5920184   | 23 145591751 C  | 38 | 15 T      | 0.0005267  |
| rs5920186   | 23 145592503 T  | 38 | 14 C      | 0.0002538  |
| rs5920190   | 23 145599038 C  | 38 | 15 T      | 0.0005267  |
| rs12690080  | 23 145605081 A  | 50 | 24 G      | 0.0002688  |
| rs6626130   | 23 145606916 A  | 45 | 20 G      | 0.000332   |
| rs12013368  | 23 145607302 C  | 47 | 22 T      | 0.0004013  |
| rs5920197   | 23 145607800 G  | 45 | 20 A      | 0.000332   |
| rs4827722   | 23 145608214 G  | 47 | 21 A      | 0.000209   |
| rs4827723   | 23 145608311 C  | 47 | 21 T      | 0.000209   |
| rs11439097  | 23 145608414 G  | 47 | 21 GA     | 0.000209   |
| rs6626622   | 23 145608730 T  | 45 | 20 C      | 0.000332   |
| rs139717812 | 23 145611501 GT | 51 | 24 G      | 0.0001515  |
| rs7064347   | 23 145611502 G  | 51 | 24 T      | 0.0001515  |
| rs62607009  | 23 145611503 T  | 51 | 24 G      | 0.0001515  |
| rs12847976  | 23 145613433 T  | 50 | 22 G      | 0.00002954 |
| rs6525699   | 23 145621372 C  | 45 | 19 G      | 0.0001682  |
| rs5920210   | 23 145623452 A  | 45 | 19 G      | 0.0001682  |
| rs5920215   | 23 145627146 G  | 46 | 21 A      | 0.0003668  |
| rs12556994  | 23 145627150 G  | 47 | 22 T      | 0.0004013  |
| rs5920216   | 23 145627182 G  | 45 | 21 A      | 0.0006315  |
| rs5966251   | 23 145627597 G  | 47 | 22 A      | 0.0004013  |
| rs2207939   | 23 145628200 A  | 47 | 22 G      | 0.0004013  |
| rs2207941   | 23 145628442 G  | 51 | 22 A      | 0.00003821 |
| rs4827730   | 23 145628722 A  | 47 | 22 T      | 0.0004013  |
| rs1543431   | 23 145629374 G  | 47 | 22 A      | 0.0004013  |
| rs2207942   | 23 145630047 C  | 27 | 7 T       | 0.0002486  |
| rs10521858  | 23 145630262 A  | 27 | 7 C       | 0.0002486  |
| X:145630523 | 23 145630523 C  | 26 | 7 CCCACTT | 0.0004518  |
| X:145630534 | 23 145630534 G  | 26 | 7 C       | 0.0004518  |
| X:145630535 | 23 145630535 T  | 26 | 7 C       | 0.0004518  |

|             |                |    |       |           |
|-------------|----------------|----|-------|-----------|
| X:145630536 | 23 145630536 G | 26 | 7 C   | 0.0004518 |
| X:145630539 | 23 145630539 T | 26 | 7 A   | 0.0004518 |
| rs202182192 | 23 145630542 T | 26 | 7 TAG | 0.0004518 |
| rs12689781  | 23 145630720 T | 27 | 7 C   | 0.0002486 |
| rs5920217   | 23 145630797 C | 54 | 27 G  | 0.000181  |
| rs2385657   | 23 145631205 A | 27 | 7 G   | 0.0002486 |
| rs5920218   | 23 145631282 A | 32 | 53 G  | 0.0009656 |
| rs5920219   | 23 145631330 G | 27 | 7 C   | 0.0002486 |
| rs2224194   | 23 145633069 T | 27 | 7 C   | 0.0002486 |
| rs5966255   | 23 145634017 T | 27 | 6 C   | 0.0000877 |
| rs5920220   | 23 145637758 T | 26 | 6 G   | 0.0001649 |
| rs6626138   | 23 145641261 A | 50 | 24 G  | 0.0002688 |
| rs5966261   | 23 145641460 G | 27 | 7 A   | 0.0002486 |
| rs5965765   | 23 145641513 A | 51 | 24 G  | 0.0001515 |
| rs5920221   | 23 145642309 G | 51 | 24 A  | 0.0001515 |
| rs5920223   | 23 145643622 C | 51 | 24 T  | 0.0001515 |
| rs5920224   | 23 145643688 C | 51 | 24 T  | 0.0001515 |
| rs5920225   | 23 145643826 C | 51 | 24 G  | 0.0001515 |
| rs5920226   | 23 145643916 C | 51 | 24 T  | 0.0001515 |
| rs5920227   | 23 145644014 G | 27 | 7 A   | 0.0002486 |
| rs5965766   | 23 145644397 C | 51 | 24 A  | 0.0001515 |
| rs1998037   | 23 145645011 C | 51 | 24 A  | 0.0001515 |
| rs12688276  | 23 145645486 T | 26 | 6 G   | 0.0001649 |
| rs5920228   | 23 145646314 G | 27 | 6 A   | 0.0000877 |
| rs1157066   | 23 145646510 G | 51 | 24 A  | 0.0001515 |
| rs5920229   | 23 145646619 G | 51 | 24 T  | 0.0001515 |
| rs4827731   | 23 145646863 C | 51 | 24 A  | 0.0001515 |
| rs4827732   | 23 145646889 G | 51 | 24 A  | 0.0001515 |
| rs4827733   | 23 145646998 C | 51 | 24 T  | 0.0001515 |
| rs4827617   | 23 145647131 G | 51 | 24 A  | 0.0001515 |
| rs4827618   | 23 145647421 G | 50 | 24 A  | 0.0002688 |
| rs6626142   | 23 145647815 G | 26 | 7 T   | 0.0004518 |
| rs6626143   | 23 145647916 G | 51 | 24 A  | 0.0001515 |
| rs6626652   | 23 145648192 C | 51 | 24 A  | 0.0001515 |
| rs7061576   | 23 145649065 T | 27 | 7 A   | 0.0002486 |
| rs1033646   | 23 145649246 C | 27 | 7 T   | 0.0002486 |
| rs1033647   | 23 145649326 A | 27 | 7 G   | 0.0002486 |
| rs1033648   | 23 145649595 G | 27 | 7 T   | 0.0002486 |
| rs5919714   | 23 145649944 G | 27 | 7 A   | 0.0002486 |
| rs1033649   | 23 145650329 C | 27 | 7 T   | 0.0002486 |

|             |                  |    |           |              |
|-------------|------------------|----|-----------|--------------|
| rs1033650   | 23 145650468 A   | 51 | 24 G      | 0.0001515    |
| rs1033651   | 23 145650554 C   | 27 | 7 A       | 0.0002486    |
| rs1033652   | 23 145650719 A   | 51 | 22 G      | 0.00003821   |
| rs57898538  | 23 145650780 CTG | 51 | 24 C      | 0.0001515    |
| rs5920231   | 23 145651231 G   | 26 | 6 A       | 0.0001649    |
| rs5966265   | 23 145653988 A   | 24 | 6 G       | 0.0005592    |
| rs62607028  | 23 145658228 A   | 52 | 28 C      | 0.0009847    |
| rs5966266   | 23 145658240 T   | 26 | 6 A       | 0.0001649    |
| rs1116419   | 23 145659829 C   | 27 | 6 T       | 0.0000877    |
| rs1118070   | 23 145661708 A   | 27 | 6 C       | 0.0000877    |
| rs369026644 | 23 145661896 G   | 26 | 6 GT      | 0.0001649    |
| rs6525706   | 23 145664570 A   | 51 | 22 T      | 0.00003821   |
| rs73240086  | 23 145666370 A   | 28 | 6 T       | 0.00004599   |
| rs368541187 | 23 145668384 T   | 27 | 6 TTATTGA | 0.0000877    |
| rs79144050  | 23 145668395 G   | 27 | 6 A       | 0.0000877    |
| rs34264217  | 23 145670465 G   | 27 | 6 T       | 0.0000877    |
| rs200026091 | 23 145670540 A   | 49 | 20 AAC    | 0.00003084   |
| rs12853269  | 23 145672354 C   | 38 | 8 T       | 0.0000009115 |
| rs2207930   | 23 145672472 T   | 55 | 30 C      | 0.0006201    |
| rs12855563  | 23 145672954 G   | 39 | 8 T       | 0.0000002313 |
| rs12855872  | 23 145672989 C   | 39 | 8 T       | 0.0000002313 |
| rs61548656  | 23 145673230 C   | 50 | 19 G      | 0.000007343  |
| rs5920237   | 23 145674023 A   | 28 | 5 G       | 0.0000138    |
| rs60071470  | 23 145674985 A   | 28 | 6 ATG     | 0.00009139   |
| rs6626660   | 23 145680046 A   | 28 | 5 G       | 0.00001183   |
| rs5919717   | 23 145681309 A   | 27 | 5 C       | 0.00002218   |
| rs5920245   | 23 145690788 C   | 46 | 19 T      | 0.00009334   |
| rs11094365  | 23 145691236 G   | 46 | 19 A      | 0.00009334   |
| rs5965773   | 23 145692932 C   | 45 | 19 T      | 0.0001682    |
| rs6626148   | 23 145694582 G   | 25 | 5 C       | 0.000102     |
| rs959605    | 23 145698003 C   | 25 | 5 T       | 0.000102     |
| rs4304470   | 23 145702711 G   | 46 | 19 T      | 0.00009334   |
| rs4250358   | 23 145702983 A   | 45 | 19 G      | 0.0001682    |
| rs4319233   | 23 145703297 C   | 25 | 5 G       | 0.00009913   |
| rs2891884   | 23 145703928 G   | 25 | 5 A       | 0.00009108   |
| rs7887109   | 23 145722579 T   | 33 | 55 C      | 0.0005652    |
| rs381365    | 23 145748908 T   | 23 | 4 G       | 0.0001119    |
| rs407585    | 23 145767522 T   | 24 | 4 A       | 0.00005751   |
| rs445978    | 23 145788647 T   | 23 | 5 A       | 0.0003539    |
| rs1620816   | 23 145796549 A   | 23 | 5 G       | 0.0003619    |

|             |                      |    |      |           |
|-------------|----------------------|----|------|-----------|
| rs192213056 | 23 146496473 G       | 1  | 14 T | 0.0002433 |
| rs5905048   | 23 146496477 G       | 32 | 55 T | 0.0003175 |
| rs7889692   | 23 147086039 G       | 13 | 0 A  | 0.00016   |
| rs199528103 | 23 147091621 AT      | 13 | 0 A  | 0.00016   |
| rs73249440  | 23 147846601 A       | 3  | 18 G | 0.0003291 |
| rs1882727   | 23 148354706 G       | 50 | 25 A | 0.000499  |
| rs10709019  | 23 148354772 TA      | 50 | 25 T | 0.000499  |
| rs2056833   | 23 148355171 G       | 50 | 25 A | 0.000499  |
| rs741733    | 23 148355251 C       | 50 | 25 T | 0.000499  |
| rs760051    | 23 148355553 C       | 50 | 25 A | 0.000499  |
| rs5936253   | 23 148358734 C       | 50 | 25 T | 0.000499  |
| rs5936254   | 23 148358760 C       | 50 | 25 T | 0.000499  |
| rs5936255   | 23 148360525 A       | 50 | 25 G | 0.000499  |
| rs1007084   | 23 148361284 A       | 50 | 25 G | 0.000499  |
| rs373447133 | 23 148361579 AT      | 50 | 25 A | 0.000499  |
| rs7051515   | 23 148362146 T       | 50 | 25 C | 0.000499  |
| rs5936256   | 23 148362574 T       | 50 | 25 C | 0.000499  |
| rs1980403   | 23 148363982 T       | 42 | 18 C | 0.0004599 |
| rs5904262   | 23 148364087 AG      | 50 | 25 A | 0.000499  |
| rs2205026   | 23 148366190 G       | 42 | 18 C | 0.0004599 |
| rs4844009   | 23 148369123 G       | 50 | 24 A | 0.0002688 |
| rs4844010   | 23 148369188 C       | 50 | 25 T | 0.000499  |
| rs5936258   | 23 148369607 C       | 50 | 25 T | 0.000499  |
| rs4581208   | 23 148370174 G       | 50 | 23 A | 0.000237  |
| rs113034212 | 23 148370310 CAGAGAG | 38 | 14 C | 0.0002545 |
| rs1882728   | 23 148370989 A       | 50 | 25 C | 0.000499  |
| rs6641287   | 23 148372456 C       | 53 | 25 T | 0.0000896 |
| rs1882731   | 23 148406285 C       | 42 | 16 T | 0.0001106 |
| rs5936259   | 23 148414197 G       | 42 | 16 T | 0.0001106 |
| rs5936182   | 23 148470066 C       | 40 | 16 A | 0.0003516 |
| rs4133910   | 23 148484659 C       | 40 | 16 A | 0.0003516 |
| rs2142021   | 23 148487605 A       | 40 | 16 C | 0.0003516 |
| rs1576343   | 23 148494332 C       | 40 | 16 T | 0.0003516 |
| rs199861875 | 23 148518096 T       | 38 | 15 C | 0.0005267 |
| rs150553377 | 23 148518856 G       | 40 | 16 T | 0.0003516 |
| rs2341057   | 23 148525397 C       | 40 | 16 A | 0.0003516 |
| rs2142024   | 23 148530880 G       | 40 | 15 T | 0.0001692 |
| rs985081    | 23 148538099 C       | 40 | 13 T | 0.0000337 |
| rs5980471   | 23 148553479 A       | 25 | 7 G  | 0.0008092 |
| rs5936284   | 23 148554165 G       | 29 | 8 A  | 0.0001956 |

|             |                |    |      |             |
|-------------|----------------|----|------|-------------|
| rs5936285   | 23 148554167 T | 29 | 8 G  | 0.0001956   |
| rs5936286   | 23 148555007 A | 29 | 8 G  | 0.0001956   |
| rs5936186   | 23 148555199 G | 29 | 8 A  | 0.0001956   |
| rs1329433   | 23 148556303 T | 29 | 8 C  | 0.0001956   |
| rs1329432   | 23 148556337 A | 29 | 8 G  | 0.0001956   |
| rs5936287   | 23 148557940 G | 29 | 8 C  | 0.0001956   |
| rs5936288   | 23 148558579 A | 29 | 8 C  | 0.0001956   |
| rs5936289   | 23 148558580 G | 29 | 8 T  | 0.0001956   |
| rs5936290   | 23 148559165 T | 28 | 8 C  | 0.0003544   |
| rs5936291   | 23 148560611 A | 27 | 8 G  | 0.0005667   |
| rs5936188   | 23 148560766 C | 27 | 8 T  | 0.0006326   |
| rs11969     | 23 148561274 C | 29 | 8 T  | 0.0001956   |
| rs1064463   | 23 148562599 A | 27 | 8 G  | 0.0006326   |
| rs685678    | 23 148565758 C | 29 | 8 A  | 0.0001956   |
| rs10218066  | 23 150343248 T | 26 | 7 G  | 0.0004518   |
| X:150712685 | 23 150712685 G | 14 | 1 GA | 0.0006677   |
| rs60273654  | 23 150838270 C | 29 | 8 T  | 0.0001956   |
| rs61186528  | 23 150838373 A | 27 | 8 G  | 0.0006326   |
| rs144794829 | 23 150849687 T | 21 | 2 C  | 0.00002453  |
| X:151164833 | 23 151164833 A | 1  | 20 T | 0.000002918 |
| rs4898495   | 23 153659164 T | 11 | 0 G  | 0.0007086   |
| rs8425      | 23 153664332 G | 11 | 0 A  | 0.0007274   |
| rs146618130 | 23 153688369 T | 11 | 0 C  | 0.0007274   |
| X:155255914 | 23 155255914 C | 11 | 0 G  | 0.0007274   |
| X:155256863 | 23 155256863 G | 11 | 0 C  | 0.0007529   |



**Supplementary Table 2.** All nominally significant ( $p \leq 0.001$ ) genetic variants (SNVs/INDELs) for leukopenia as determined by Fisher's exact test.

| rsID        | Chromosome | Position | Minor allele | Minor allele frequency among cases | Minor allele frequency among controls | Major allele | p-value     |
|-------------|------------|----------|--------------|------------------------------------|---------------------------------------|--------------|-------------|
| rs780587    | 1          | 4505966  | T            | 7                                  | 0 C                                   |              | 0.0008679   |
| rs4990051   | 1          | 4582998  | A            | 17                                 | 3 C                                   |              | 0.000003925 |
| 1:4583000   | 1          | 4583000  | A            | 13                                 | 3 C                                   |              | 0.0002093   |
| rs17030882  | 1          | 7505217  | T            | 7                                  | 0 C                                   |              | 0.0008679   |
| rs5772364   | 1          | 9351017  | C            | 12                                 | 47 CT                                 |              | 0.0004795   |
| rs9434757   | 1          | 9351785  | C            | 11                                 | 47 G                                  |              | 0.0001343   |
| rs4080311   | 1          | 9355278  | A            | 2                                  | 23 T                                  |              | 0.0005167   |
| rs563317    | 1          | 9357948  | G            | 37                                 | 33 C                                  |              | 0.0006234   |
| rs622662    | 1          | 9358085  | C            | 37                                 | 33 G                                  |              | 0.0006234   |
| rs621846    | 1          | 9358243  | C            | 37                                 | 33 T                                  |              | 0.0006234   |
| rs74052097  | 1          | 11028623 | T            | 7                                  | 0 C                                   |              | 0.0008679   |
| rs74052098  | 1          | 11028631 | T            | 7                                  | 0 G                                   |              | 0.0008679   |
| rs74052099  | 1          | 11029552 | T            | 7                                  | 0 C                                   |              | 0.0008679   |
| rs56102775  | 1          | 11029942 | A            | 7                                  | 0 G                                   |              | 0.0008679   |
| rs78234331  | 1          | 11030861 | T            | 7                                  | 0 C                                   |              | 0.0008679   |
| rs637299    | 1          | 12219861 | G            | 38                                 | 35 C                                  |              | 0.0006427   |
| rs816060    | 1          | 12219910 | G            | 38                                 | 35 A                                  |              | 0.0006427   |
| rs622839    | 1          | 12220797 | C            | 38                                 | 34 G                                  |              | 0.000347    |
| rs150885757 | 1          | 12221069 | CA           | 31                                 | 30 C                                  |              | 0.0003475   |
| rs534146    | 1          | 12221606 | G            | 38                                 | 35 A                                  |              | 0.0006427   |
| rs11122006  | 1          | 12917017 | G            | 22                                 | 13 T                                  |              | 0.0006749   |
| rs2260539   | 1          | 12922908 | G            | 24                                 | 14 A                                  |              | 0.0003806   |
| rs2743657   | 1          | 12923108 | T            | 18                                 | 9 C                                   |              | 0.0009279   |
| rs72472702  | 1          | 12923209 | A            | 24                                 | 14 T                                  |              | 0.0003806   |
| rs141354376 | 1          | 12923779 | C            | 24                                 | 14 T                                  |              | 0.0003806   |
| rs116769915 | 1          | 12925918 | A            | 23                                 | 12 C                                  |              | 0.0002434   |
| rs11811058  | 1          | 12927186 | A            | 25                                 | 15 G                                  |              | 0.0002543   |
| rs199989365 | 1          | 12931538 | G            | 18                                 | 7 A                                   |              | 0.0001556   |
| rs3895132   | 1          | 12940822 | T            | 23                                 | 13 A                                  |              | 0.0003278   |
| rs12120528  | 1          | 12941125 | C            | 23                                 | 12 T                                  |              | 0.0002434   |
| rs138280829 | 1          | 12941381 | A            | 14                                 | 4 G                                   |              | 0.0003939   |
| rs4993091   | 1          | 12941437 | A            | 23                                 | 13 G                                  |              | 0.0003278   |
| rs3121081   | 1          | 12943038 | C            | 23                                 | 11 A                                  |              | 0.00008787  |
| 1:12962181  | 1          | 12962181 | C            | 14                                 | 4 CTCTCCCTCTCCCTCTCCCTC               |              | 0.00049     |
| rs374538704 | 1          | 12997870 | C            | 13                                 | 4 T                                   |              | 0.000883    |
| rs2744690   | 1          | 14137801 | A            | 13                                 | 4 C                                   |              | 0.000883    |
| rs2744689   | 1          | 14137908 | T            | 13                                 | 4 C                                   |              | 0.000883    |
| rs2744688   | 1          | 14138493 | G            | 13                                 | 4 A                                   |              | 0.000883    |
| rs2744687   | 1          | 14138813 | T            | 13                                 | 4 G                                   |              | 0.000883    |

|             |   |             |    |                        |            |
|-------------|---|-------------|----|------------------------|------------|
| rs34646499  | 1 | 14138827 CG | 13 | 4 C                    | 0.000883   |
| rs2245213   | 1 | 14139683 A  | 15 | 4 C                    | 0.000175   |
| rs2245218   | 1 | 14139826 C  | 15 | 4 T                    | 0.000175   |
| rs2235516   | 1 | 14140457 A  | 14 | 3 G                    | 0.00009441 |
| rs2235514   | 1 | 14146935 G  | 15 | 4 A                    | 0.000175   |
| rs2697964   | 1 | 14150709 C  | 15 | 4 T                    | 0.000175   |
| rs2744680   | 1 | 14150714 G  | 15 | 4 A                    | 0.000175   |
| rs2697963   | 1 | 14150740 G  | 15 | 4 T                    | 0.000175   |
| rs58504586  | 1 | 14152152 T  | 15 | 4 TC                   | 0.000175   |
| rs2744678   | 1 | 14152217 G  | 15 | 4 A                    | 0.000175   |
| rs2697961   | 1 | 14153333 C  | 15 | 4 T                    | 0.000175   |
| rs2697960   | 1 | 14153837 A  | 15 | 4 G                    | 0.000175   |
| rs2744677   | 1 | 14154723 G  | 18 | 8 T                    | 0.0005897  |
| rs149580705 | 1 | 14154806 A  | 18 | 8 AGTAAACTTACCTGTTTCTG | 0.0005897  |
| rs2697983   | 1 | 14157577 A  | 18 | 8 G                    | 0.0005897  |
| rs3978481   | 1 | 16369761 A  | 34 | 30 G                   | 0.0009121  |
| rs34400771  | 1 | 17493815 T  | 8  | 0 C                    | 0.0003016  |
| rs114352248 | 1 | 23737013 T  | 7  | 0 C                    | 0.0008679  |
| rs76230830  | 1 | 23784293 G  | 7  | 0 A                    | 0.0008679  |
| rs7512844   | 1 | 23826473 T  | 7  | 0 G                    | 0.0008679  |
| 1:23864717  | 1 | 23864717 AT | 7  | 0 A                    | 0.0008062  |
| rs195738    | 1 | 24806560 C  | 28 | 19 T                   | 0.0005259  |
| rs200943188 | 1 | 35068893 G  | 9  | 1 GAGAGAC              | 0.0007194  |
| rs6658272   | 1 | 38472841 T  | 20 | 10 C                   | 0.0005561  |
| rs1037976   | 1 | 38501187 T  | 3  | 26 C                   | 0.0005074  |
| rs7553786   | 1 | 38514453 T  | 21 | 12 C                   | 0.0009318  |
| rs34371200  | 1 | 38516178 T  | 3  | 26 TA                  | 0.0005074  |
| rs4970582   | 1 | 38516567 C  | 3  | 26 T                   | 0.0005074  |
| rs11205722  | 1 | 38517981 G  | 3  | 26 A                   | 0.0005074  |
| rs6688460   | 1 | 38522618 C  | 1  | 19 T                   | 0.0008417  |
| rs34125937  | 1 | 38524773 G  | 1  | 19 A                   | 0.0008417  |
| rs12723955  | 1 | 38527331 G  | 1  | 19 A                   | 0.0008417  |
| rs7537906   | 1 | 38527502 G  | 1  | 19 A                   | 0.0008417  |
| rs2247886   | 1 | 38931754 A  | 13 | 49 C                   | 0.0003246  |
| 1:40190955  | 1 | 40190955 A  | 13 | 4 T                    | 0.0007457  |
| rs232872    | 1 | 59118959 A  | 9  | 42 G                   | 0.0003081  |
| rs232869    | 1 | 59119135 C  | 9  | 42 A                   | 0.0003081  |
| rs232861    | 1 | 59120399 T  | 9  | 42 G                   | 0.0003081  |
| rs232851    | 1 | 59122871 C  | 9  | 43 T                   | 0.0001644  |
| rs232775    | 1 | 59124546 A  | 9  | 42 G                   | 0.0003081  |
| rs232776    | 1 | 59124803 C  | 9  | 42 T                   | 0.0003081  |

|            |   |            |    |      |           |
|------------|---|------------|----|------|-----------|
| rs232781   | 1 | 59127637 T | 9  | 42 G | 0.0003081 |
| rs232791   | 1 | 59131481 C | 9  | 42 T | 0.0003081 |
| rs506077   | 1 | 59136429 A | 9  | 42 C | 0.0003081 |
| rs506078   | 1 | 59136431 T | 9  | 42 C | 0.0003081 |
| rs12082097 | 1 | 59137111 T | 9  | 42 C | 0.0003081 |
| rs12076717 | 1 | 59137120 G | 9  | 42 A | 0.0003081 |
| rs10489539 | 1 | 59137210 C | 9  | 42 T | 0.0003081 |
| rs539141   | 1 | 59137783 A | 9  | 42 G | 0.0003081 |
| rs11207286 | 1 | 59137987 G | 9  | 42 A | 0.0003081 |
| rs2064370  | 1 | 59139223 C | 9  | 42 G | 0.0003081 |
| rs11207287 | 1 | 59139537 G | 9  | 42 A | 0.0003081 |
| rs2029648  | 1 | 59139725 G | 9  | 42 A | 0.0003081 |
| rs11207288 | 1 | 59140552 T | 9  | 43 C | 0.0002957 |
| rs11207289 | 1 | 59140553 G | 9  | 43 A | 0.0002957 |
| rs2406931  | 1 | 59141818 C | 9  | 42 T | 0.0003081 |
| rs554318   | 1 | 59142248 T | 9  | 42 C | 0.0003081 |
| rs579110   | 1 | 59142713 T | 9  | 42 C | 0.0003081 |
| rs10789070 | 1 | 59144465 C | 9  | 42 T | 0.0003081 |
| rs527445   | 1 | 59144479 T | 9  | 42 C | 0.0003081 |
| rs584284   | 1 | 59144787 A | 9  | 42 G | 0.0003081 |
| rs4506484  | 1 | 59145452 A | 9  | 42 C | 0.0003081 |
| rs4912370  | 1 | 59146186 T | 10 | 42 C | 0.0006808 |
| rs11207292 | 1 | 59147420 G | 9  | 41 A | 0.0003404 |
| rs12139511 | 1 | 59147926 T | 9  | 41 C | 0.0003404 |
| rs6658186  | 1 | 59148618 C | 9  | 41 T | 0.0003404 |
| rs6587836  | 1 | 59149561 A | 10 | 42 C | 0.0006808 |
| rs6661709  | 1 | 59149612 C | 10 | 42 G | 0.0006808 |
| rs6686043  | 1 | 59149664 A | 9  | 41 T | 0.0003404 |
| rs2206765  | 1 | 59151273 G | 10 | 42 C | 0.0006808 |
| rs2064371  | 1 | 59152015 C | 9  | 41 T | 0.0003404 |
| rs2064372  | 1 | 59152134 T | 9  | 41 G | 0.0003404 |
| rs12092121 | 1 | 59153010 G | 9  | 41 A | 0.0003404 |
| rs12097517 | 1 | 59153067 T | 9  | 41 C | 0.0003404 |
| rs12737850 | 1 | 59153177 A | 9  | 41 T | 0.0003404 |
| rs2223698  | 1 | 59155683 T | 10 | 42 C | 0.0006808 |
| rs12076049 | 1 | 59156155 C | 9  | 41 T | 0.0003404 |
| rs12755615 | 1 | 59156825 G | 10 | 43 C | 0.0003854 |
| rs2746081  | 1 | 59158161 A | 9  | 41 G | 0.0003404 |
| rs12097333 | 1 | 59158632 T | 9  | 41 C | 0.0003404 |
| rs12741968 | 1 | 59159062 G | 9  | 41 T | 0.0003404 |
| rs2746082  | 1 | 59160283 G | 9  | 41 C | 0.0005204 |

|             |   |                  |    |          |            |
|-------------|---|------------------|----|----------|------------|
| rs11207293  | 1 | 59160380 G       | 9  | 40 C     | 0.0005923  |
| rs66629118  | 1 | 59160724 TA      | 8  | 43 T     | 0.00005831 |
| rs2473746   | 1 | 59160735 G       | 8  | 41 A     | 0.0002447  |
| rs2064374   | 1 | 59160885 G       | 9  | 41 A     | 0.0003404  |
| rs5774423   | 1 | 59160982 A       | 9  | 41 ATACT | 0.0003404  |
| rs2811893   | 1 | 59162148 C       | 9  | 41 T     | 0.0003404  |
| rs4912373   | 1 | 59162493 C       | 9  | 41 A     | 0.0003404  |
| rs6701772   | 1 | 59162675 A       | 10 | 42 G     | 0.0006808  |
| rs6677560   | 1 | 59162793 G       | 9  | 41 A     | 0.0003404  |
| rs112756138 | 1 | 59162923 GAGGC   | 9  | 41 G     | 0.0003404  |
| rs6656037   | 1 | 59163286 A       | 8  | 40 C     | 0.0004251  |
| rs6680626   | 1 | 59163441 G       | 9  | 40 A     | 0.000591   |
| rs6680750   | 1 | 59163553 G       | 10 | 42 A     | 0.0006808  |
| rs11803186  | 1 | 59164140 G       | 9  | 41 A     | 0.0003404  |
| rs11368794  | 1 | 59164220 AG      | 9  | 41 A     | 0.0003404  |
| rs10691262  | 1 | 59164244 AAAAATT | 10 | 42 A     | 0.0006808  |
| rs10889110  | 1 | 59164512 T       | 9  | 41 C     | 0.0003404  |
| rs11207298  | 1 | 59167316 A       | 10 | 42 C     | 0.0006808  |
| rs10889111  | 1 | 59169839 C       | 10 | 45 A     | 0.0001954  |
| rs10889112  | 1 | 59169895 C       | 11 | 46 T     | 0.0002401  |
| rs10889113  | 1 | 59173187 G       | 10 | 42 A     | 0.0003844  |
| rs10159308  | 1 | 59174129 G       | 10 | 45 A     | 0.0001954  |
| rs5774424   | 1 | 59175216 A       | 10 | 45 AAG   | 0.0001954  |
| rs10158502  | 1 | 59175979 A       | 10 | 45 C     | 0.0001954  |
| rs6668605   | 1 | 59179331 G       | 11 | 45 A     | 0.0004315  |
| rs1323280   | 1 | 59201807 C       | 9  | 42 T     | 0.0003081  |
| rs201586451 | 1 | 61446080 A       | 9  | 1 AG     | 0.0007194  |
| rs1260836   | 1 | 64488856 A       | 6  | 34 G     | 0.0005004  |
| rs2991270   | 1 | 65239444 C       | 33 | 28 A     | 0.0009909  |
| rs310239    | 1 | 65277910 T       | 33 | 28 A     | 0.0009909  |
| rs1333739   | 1 | 65293449 T       | 33 | 28 A     | 0.0009909  |
| rs113399410 | 1 | 65857369 G       | 7  | 0 GA     | 0.0008679  |
| rs11208644  | 1 | 65858151 T       | 7  | 0 C      | 0.0008679  |
| rs59610328  | 1 | 65859783 AGC     | 7  | 0 A      | 0.0008679  |
| rs7532967   | 1 | 65859869 C       | 7  | 0 A      | 0.0008679  |
| rs7555604   | 1 | 65859910 G       | 7  | 0 C      | 0.0008679  |
| rs12077111  | 1 | 65860660 C       | 7  | 0 T      | 0.0008679  |
| rs3930551   | 1 | 65860874 G       | 7  | 0 T      | 0.0008679  |
| rs7556443   | 1 | 65861340 C       | 7  | 0 T      | 0.0008679  |
| rs10218548  | 1 | 65861555 C       | 7  | 0 A      | 0.0008679  |
| rs9326067   | 1 | 65861660 C       | 7  | 0 T      | 0.0008679  |

|             |   |                      |    |       |           |
|-------------|---|----------------------|----|-------|-----------|
| rs4915689   | 1 | 65862079 G           | 7  | 0 C   | 0.0008679 |
| rs4916048   | 1 | 65862508 G           | 7  | 0 C   | 0.0008679 |
| rs4916049   | 1 | 65862747 A           | 7  | 0 G   | 0.0008679 |
| rs4916050   | 1 | 65862844 A           | 7  | 0 C   | 0.0008679 |
| rs4916051   | 1 | 65862897 A           | 7  | 0 C   | 0.0008679 |
| 1:65862956  | 1 | 65862956 ATTG        | 7  | 0 A   | 0.0008679 |
| 1:65862957  | 1 | 65862957 CCCACCTGCAA | 7  | 0 C   | 0.0008679 |
| rs12087420  | 1 | 65864009 G           | 7  | 0 A   | 0.0008679 |
| rs10889547  | 1 | 65864198 G           | 7  | 0 A   | 0.0008679 |
| rs10889548  | 1 | 65864220 T           | 7  | 0 G   | 0.0008679 |
| rs7415248   | 1 | 65865662 G           | 7  | 0 A   | 0.0008679 |
| rs4915690   | 1 | 65866667 G           | 7  | 0 T   | 0.0008679 |
| rs4915692   | 1 | 65867715 T           | 7  | 0 C   | 0.0008679 |
| rs143451102 | 1 | 68769719 G           | 7  | 0 A   | 0.0008679 |
| rs148941019 | 1 | 68796152 T           | 7  | 0 A   | 0.0008679 |
| rs145790006 | 1 | 68832288 A           | 8  | 0 G   | 0.0003016 |
| rs71095930  | 1 | 71590995 T           | 21 | 11 TC | 0.0003893 |
| rs74365843  | 1 | 71652676 T           | 29 | 21 C  | 0.0005775 |
| rs1417709   | 1 | 71656481 A           | 29 | 22 G  | 0.0007063 |
| rs2639329   | 1 | 71660120 G           | 29 | 22 A  | 0.0007063 |
| rs2796201   | 1 | 71660796 C           | 29 | 22 T  | 0.0007063 |
| rs1954285   | 1 | 71662977 T           | 29 | 21 A  | 0.0005775 |
| rs952337    | 1 | 71663414 T           | 29 | 21 A  | 0.0005775 |
| rs2796203   | 1 | 71665671 T           | 29 | 21 C  | 0.0005775 |
| rs2066371   | 1 | 71667881 G           | 29 | 22 A  | 0.0007063 |
| rs1573061   | 1 | 71668906 C           | 29 | 21 T  | 0.0005775 |
| rs2639338   | 1 | 71672398 A           | 29 | 21 G  | 0.0005775 |
| rs2639339   | 1 | 71672677 G           | 29 | 21 C  | 0.0005775 |
| rs12406316  | 1 | 71673738 T           | 29 | 21 C  | 0.0005775 |
| rs2639335   | 1 | 71676127 A           | 29 | 21 G  | 0.0005775 |
| rs2639334   | 1 | 71677428 G           | 29 | 22 A  | 0.0007063 |
| rs2249759   | 1 | 71681377 C           | 29 | 22 T  | 0.0007063 |
| rs370402759 | 1 | 71683102 G           | 29 | 22 C  | 0.0007063 |
| rs12759919  | 1 | 71685633 T           | 29 | 21 G  | 0.0005775 |
| rs9726375   | 1 | 71686237 C           | 29 | 21 A  | 0.0005775 |
| rs2796190   | 1 | 71698274 A           | 29 | 21 G  | 0.0005775 |
| rs2639331   | 1 | 71698461 T           | 29 | 21 C  | 0.0005775 |
| rs2796192   | 1 | 71698946 C           | 29 | 22 G  | 0.0007063 |
| rs2639330   | 1 | 71699013 T           | 29 | 21 C  | 0.0005775 |
| rs2790674   | 1 | 71719363 C           | 27 | 19 T  | 0.0008555 |
| rs35251740  | 1 | 71746844 CT          | 15 | 5 C   | 0.0002217 |

|             |   |                |    |         |            |
|-------------|---|----------------|----|---------|------------|
| rs368186205 | 1 | 85615108 G     | 18 | 8 A     | 0.0002786  |
| rs28663573  | 1 | 88656453 G     | 35 | 28 C    | 0.0001616  |
| rs1336584   | 1 | 88656688 T     | 35 | 28 C    | 0.0001616  |
| rs12755168  | 1 | 88657007 T     | 37 | 28 G    | 0.00003443 |
| rs34293383  | 1 | 88658666 G     | 37 | 29 GA   | 0.00007345 |
| rs12145817  | 1 | 88662490 G     | 39 | 30 A    | 0.00001738 |
| rs12117110  | 1 | 88663269 G     | 39 | 30 A    | 0.00001738 |
| rs10923040  | 1 | 88664008 C     | 36 | 29 T    | 0.0001509  |
| rs11577821  | 1 | 88676956 C     | 16 | 7 G     | 0.0009539  |
| rs10923044  | 1 | 88681580 C     | 16 | 7 T     | 0.0009539  |
| rs2039626   | 1 | 88684866 G     | 14 | 5 A     | 0.0008508  |
| rs4656023   | 1 | 88688065 G     | 14 | 5 A     | 0.0008508  |
| rs59267365  | 1 | 88698986 T     | 17 | 7 C     | 0.0004382  |
| rs12407424  | 1 | 88832596 G     | 7  | 0 A     | 0.0008679  |
| rs12123312  | 1 | 90305865 T     | 25 | 16 A    | 0.0005585  |
| rs79573214  | 1 | 98669432 T     | 14 | 5 G     | 0.0008508  |
| rs72719817  | 1 | 98671145 G     | 14 | 5 C     | 0.0008508  |
| rs371116664 | 1 | 98671431 A     | 14 | 5 AAAGG | 0.0008508  |
| rs143827852 | 1 | 98673434 GA    | 14 | 5 G     | 0.0008508  |
| rs116196581 | 1 | 98673909 C     | 14 | 5 G     | 0.0008508  |
| rs78249251  | 1 | 98675141 G     | 14 | 5 C     | 0.0008508  |
| rs11342720  | 1 | 98675992 C     | 14 | 5 CT    | 0.0008508  |
| rs138511666 | 1 | 98679233 C     | 14 | 5 A     | 0.0008508  |
| rs72719839  | 1 | 98695915 C     | 14 | 5 T     | 0.0008508  |
| rs148603931 | 1 | 98697195 A     | 14 | 5 AC    | 0.0008508  |
| rs10648324  | 1 | 98698522 GTGGA | 14 | 5 G     | 0.0008508  |
| rs6672621   | 1 | 98698557 T     | 14 | 5 C     | 0.0008508  |
| rs12041603  | 1 | 98700623 T     | 14 | 5 C     | 0.0008508  |
| rs2391926   | 1 | 98701571 G     | 14 | 5 A     | 0.0008508  |
| rs12028859  | 1 | 98703049 C     | 14 | 5 T     | 0.0008508  |
| rs11165972  | 1 | 98712294 G     | 14 | 5 T     | 0.0008508  |
| rs12030857  | 1 | 98712337 T     | 14 | 5 G     | 0.0008508  |
| rs12030892  | 1 | 98712356 A     | 14 | 5 G     | 0.0008508  |
| rs12751197  | 1 | 98727780 C     | 28 | 20 A    | 0.0005398  |
| rs730023    | 1 | 112515115 C    | 36 | 32 G    | 0.0006397  |
| rs3008541   | 1 | 112516919 A    | 36 | 32 G    | 0.0006397  |
| rs1373286   | 1 | 112517914 A    | 36 | 32 G    | 0.0006397  |
| rs3000756   | 1 | 112518120 C    | 36 | 32 T    | 0.0006397  |
| 1:142538413 | 1 | 142538413 G    | 7  | 0 T     | 0.0008679  |
| 1:142538419 | 1 | 142538419 C    | 7  | 0 G     | 0.0008679  |
| 1:142538775 | 1 | 142538775 T    | 7  | 0 A     | 0.0008679  |

|             |   |                   |    |       |            |
|-------------|---|-------------------|----|-------|------------|
| 1:142577113 | 1 | 142577113 G       | 13 | 4 A   | 0.000883   |
| 1:143352871 | 1 | 143352871 C       | 7  | 0 T   | 0.0008679  |
| 1:148200111 | 1 | 148200111 T       | 7  | 0 C   | 0.0008679  |
| rs77287809  | 1 | 152125335 A       | 7  | 0 C   | 0.0008679  |
| rs12093512  | 1 | 152158481 T       | 7  | 0 C   | 0.0008679  |
| rs186123580 | 1 | 152174073 T       | 7  | 0 C   | 0.0008679  |
| rs11581057  | 1 | 156991688 C       | 17 | 6 T   | 0.0002592  |
| rs11584902  | 1 | 157001597 C       | 17 | 6 G   | 0.0002592  |
| rs34314027  | 1 | 157003864 C       | 17 | 6 T   | 0.0002592  |
| 1:157016023 | 1 | 157016023 GCCGCCA | 16 | 5 G   | 0.0001588  |
| rs150800619 | 1 | 157025409 CT      | 17 | 6 C   | 0.0002592  |
| rs11577418  | 1 | 157026971 A       | 17 | 6 G   | 0.0002592  |
| rs11576099  | 1 | 157027002 C       | 17 | 6 T   | 0.0002592  |
| rs11576100  | 1 | 157027028 C       | 17 | 6 T   | 0.0002592  |
| rs71593876  | 1 | 157027179 C       | 17 | 6 CT  | 0.0002592  |
| rs35631733  | 1 | 157027288 T       | 17 | 6 TAA | 0.0002592  |
| rs11581893  | 1 | 157027520 T       | 17 | 6 C   | 0.0002592  |
| rs35756545  | 1 | 157027944 T       | 17 | 6 C   | 0.0002592  |
| rs12745721  | 1 | 157028212 T       | 17 | 6 G   | 0.0002592  |
| rs34160895  | 1 | 157028313 A       | 17 | 5 AG  | 0.00006668 |
| rs11582411  | 1 | 157028335 T       | 17 | 6 C   | 0.0002592  |
| rs11577087  | 1 | 157028388 C       | 18 | 6 T   | 0.0000668  |
| rs11578403  | 1 | 157028389 A       | 18 | 6 G   | 0.0000668  |
| rs11578421  | 1 | 157028531 A       | 17 | 6 G   | 0.0002592  |
| rs11577133  | 1 | 157028744 G       | 16 | 6 T   | 0.0005436  |
| rs11582484  | 1 | 157028809 A       | 17 | 6 C   | 0.0002592  |
| rs866605    | 1 | 157028990 T       | 17 | 6 C   | 0.0002592  |
| rs61326781  | 1 | 157029134 C       | 17 | 6 T   | 0.0002592  |
| rs11577688  | 1 | 157029857 C       | 17 | 6 T   | 0.0002592  |
| rs61329932  | 1 | 157030077 A       | 17 | 6 T   | 0.0002592  |
| rs58824481  | 1 | 157030082 T       | 17 | 6 C   | 0.0002592  |
| rs59571768  | 1 | 157030099 A       | 17 | 6 G   | 0.0002592  |
| rs1706      | 1 | 157030280 C       | 17 | 6 T   | 0.0002592  |
| rs11590493  | 1 | 157030627 C       | 16 | 6 T   | 0.0005436  |
| rs35256778  | 1 | 157031010 A       | 17 | 6 G   | 0.0002592  |
| rs34994593  | 1 | 157031017 G       | 17 | 6 A   | 0.0002592  |
| rs35045427  | 1 | 157031055 G       | 17 | 6 T   | 0.0002592  |
| rs34230711  | 1 | 157031435 A       | 17 | 6 G   | 0.0002592  |
| rs12735183  | 1 | 157031591 T       | 17 | 6 C   | 0.0002592  |
| rs12759104  | 1 | 157031622 C       | 17 | 6 T   | 0.0002592  |
| rs12734005  | 1 | 157031623 C       | 17 | 6 G   | 0.0002592  |

|             |   |              |    |      |           |
|-------------|---|--------------|----|------|-----------|
| rs12759254  | 1 | 157031678 C  | 17 | 6 T  | 0.0002592 |
| rs35209965  | 1 | 157031969 C  | 17 | 6 CT | 0.0002592 |
| rs12759732  | 1 | 157032001 C  | 17 | 6 T  | 0.0002592 |
| rs35418037  | 1 | 157032593 A  | 17 | 6 G  | 0.0002592 |
| rs59149386  | 1 | 157032706 T  | 17 | 6 C  | 0.0002592 |
| rs34609359  | 1 | 157032832 C  | 17 | 6 T  | 0.0002592 |
| rs34971986  | 1 | 157032883 G  | 17 | 6 A  | 0.0002592 |
| rs11581819  | 1 | 157032995 T  | 17 | 6 C  | 0.0002592 |
| rs11577808  | 1 | 157033027 A  | 17 | 6 G  | 0.0002592 |
| rs11576914  | 1 | 157033294 A  | 17 | 6 T  | 0.0002592 |
| rs11576533  | 1 | 157033505 G  | 17 | 6 A  | 0.0002592 |
| rs35275017  | 1 | 157033610 C  | 17 | 7 CT | 0.0004382 |
| rs12731416  | 1 | 157033664 C  | 17 | 6 T  | 0.0002592 |
| rs67062038  | 1 | 157033901 G  | 17 | 6 A  | 0.0002592 |
| rs67278038  | 1 | 157033919 A  | 17 | 6 G  | 0.0002592 |
| rs35025242  | 1 | 157033971 AT | 16 | 6 A  | 0.0005436 |
| rs34177345  | 1 | 157034213 A  | 17 | 6 G  | 0.0002592 |
| rs34065145  | 1 | 157034246 C  | 17 | 6 T  | 0.0002592 |
| rs34438489  | 1 | 157034325 C  | 17 | 6 T  | 0.0002592 |
| rs11582800  | 1 | 157034471 T  | 17 | 6 C  | 0.0002592 |
| rs11577472  | 1 | 157034503 A  | 17 | 6 T  | 0.0002592 |
| rs35043156  | 1 | 157034715 G  | 17 | 6 A  | 0.0002592 |
| rs138311748 | 1 | 157035303 T  | 17 | 6 C  | 0.0002592 |
| rs115482314 | 1 | 157035522 G  | 17 | 6 C  | 0.0002592 |
| rs146206625 | 1 | 157035548 A  | 17 | 6 C  | 0.0002592 |
| rs144424473 | 1 | 157035772 C  | 17 | 6 T  | 0.0002592 |
| rs12743010  | 1 | 157036195 G  | 17 | 6 A  | 0.0002592 |
| rs34047481  | 1 | 157036233 CA | 17 | 6 C  | 0.0002592 |
| rs12760516  | 1 | 157036266 T  | 17 | 6 G  | 0.0002592 |
| rs12747244  | 1 | 157036322 C  | 17 | 6 T  | 0.0002592 |
| rs12747418  | 1 | 157036424 A  | 17 | 6 T  | 0.0002592 |
| rs71593878  | 1 | 157036573 C  | 17 | 6 CT | 0.0002592 |
| rs66524118  | 1 | 157036657 T  | 17 | 6 C  | 0.0002592 |
| rs67992922  | 1 | 157036686 C  | 17 | 6 T  | 0.0002592 |
| rs67871969  | 1 | 157036870 G  | 17 | 6 A  | 0.0002592 |
| rs35310943  | 1 | 157036956 C  | 17 | 6 G  | 0.0002592 |
| rs34330037  | 1 | 157036971 T  | 17 | 6 C  | 0.0002592 |
| rs34951264  | 1 | 157037242 C  | 17 | 6 G  | 0.0002592 |
| rs35958339  | 1 | 157037270 A  | 17 | 6 AT | 0.0002592 |
| rs60784227  | 1 | 157037779 G  | 17 | 6 T  | 0.0002592 |
| rs57543447  | 1 | 157037957 G  | 17 | 6 A  | 0.0002592 |



|             |   |                         |    |      |            |
|-------------|---|-------------------------|----|------|------------|
| rs61407874  | 1 | 157038008 G             | 17 | 6 A  | 0.0002592  |
| rs12728942  | 1 | 157038163 C             | 17 | 6 G  | 0.0002592  |
| rs12753932  | 1 | 157038227 G             | 17 | 6 A  | 0.0002592  |
| rs12758039  | 1 | 157038250 G             | 17 | 6 T  | 0.0002592  |
| rs36051715  | 1 | 157038624 C             | 17 | 6 G  | 0.0002592  |
| rs12759047  | 1 | 157038865 G             | 17 | 6 T  | 0.0002592  |
| rs12759364  | 1 | 157038997 C             | 17 | 6 T  | 0.0002592  |
| rs12759394  | 1 | 157039061 C             | 17 | 6 T  | 0.0002592  |
| rs12755356  | 1 | 157039073 G             | 17 | 6 A  | 0.0002592  |
| rs12725372  | 1 | 157039400 C             | 17 | 6 T  | 0.0002592  |
| rs12725382  | 1 | 157039437 C             | 17 | 6 T  | 0.0002592  |
| rs12739927  | 1 | 157039462 A             | 17 | 6 C  | 0.0002592  |
| rs12739240  | 1 | 157039741 A             | 17 | 6 G  | 0.0002592  |
| rs35904515  | 1 | 157040203 A             | 17 | 6 G  | 0.0002592  |
| rs34909260  | 1 | 157040296 G             | 17 | 6 A  | 0.0002592  |
| rs12755131  | 1 | 157040527 G             | 17 | 6 C  | 0.0002592  |
| rs12740642  | 1 | 157040552 C             | 17 | 6 T  | 0.0002592  |
| rs12741140  | 1 | 157040837 C             | 17 | 6 T  | 0.0002592  |
| rs12755959  | 1 | 157041010 T             | 17 | 6 C  | 0.0002592  |
| rs12737408  | 1 | 157041078 G             | 17 | 6 A  | 0.0002592  |
| rs12756141  | 1 | 157041107 T             | 17 | 6 C  | 0.0002592  |
| rs12760052  | 1 | 157041181 G             | 17 | 6 C  | 0.0002592  |
| rs12760229  | 1 | 157041302 T             | 17 | 6 C  | 0.0002592  |
| rs56801406  | 1 | 157044993 G             | 18 | 7 C  | 0.0001975  |
| rs59462822  | 1 | 157045213 A             | 18 | 7 G  | 0.0001975  |
| rs35188764  | 1 | 157046198 G             | 17 | 5 A  | 0.00006668 |
| rs36032506  | 1 | 157046248 T             | 17 | 6 C  | 0.0002592  |
| rs34074614  | 1 | 157047366 C             | 17 | 6 T  | 0.0002592  |
| rs11587380  | 1 | 157048220 G             | 18 | 7 C  | 0.0001975  |
| rs11587404  | 1 | 157048354 T             | 17 | 6 C  | 0.0002592  |
| rs34961273  | 1 | 157050194 G             | 17 | 6 A  | 0.0002592  |
| rs12752535  | 1 | 157050368 T             | 17 | 6 G  | 0.0002592  |
| rs11578226  | 1 | 157051348 C             | 18 | 7 T  | 0.0001975  |
| rs34328576  | 1 | 157051761 CCCT          | 17 | 6 C  | 0.0002592  |
| rs149171885 | 1 | 157052071 TCAGTTTGGCATT | 18 | 7 T  | 0.0001975  |
| rs34414479  | 1 | 157052224 A             | 18 | 7 G  | 0.0001975  |
| rs34369222  | 1 | 157052352 G             | 17 | 6 A  | 0.0002592  |
| rs35090422  | 1 | 157052784 G             | 17 | 6 GA | 0.0002592  |
| rs34542108  | 1 | 157052794 T             | 17 | 6 C  | 0.0002592  |
| rs11580245  | 1 | 157052987 A             | 17 | 6 G  | 0.0002592  |
| rs35043649  | 1 | 157053226 ATT           | 17 | 6 A  | 0.0002592  |

|             |   |                        |    |           |            |
|-------------|---|------------------------|----|-----------|------------|
| rs1176561   | 1 | 157053342 T            | 17 | 5 C       | 0.00006668 |
| rs12080191  | 1 | 157053415 T            | 17 | 6 C       | 0.0002592  |
| rs11580501  | 1 | 157055760 C            | 17 | 6 T       | 0.0002592  |
| rs67980707  | 1 | 157060544 G            | 17 | 6 A       | 0.0002592  |
| rs67947469  | 1 | 157061643 T            | 17 | 6 C       | 0.0002592  |
| rs12136960  | 1 | 157062739 G            | 22 | 10 C      | 0.00007379 |
| rs72700786  | 1 | 157077970 T            | 13 | 4 C       | 0.000883   |
| rs35947264  | 1 | 157079790 G            | 13 | 4 A       | 0.000883   |
| rs2275703   | 1 | 160165095 C            | 38 | 33 A      | 0.0001874  |
| rs35652278  | 1 | 160241692 AT           | 16 | 54 A      | 0.0003907  |
| rs114513978 | 1 | 160241695 T            | 16 | 54 A      | 0.0003907  |
| rs1886417   | 1 | 160313733 A            | 38 | 35 C      | 0.0006427  |
| rs12143237  | 1 | 164491903 A            | 24 | 13 G      | 0.0001567  |
| rs12402920  | 1 | 164492154 T            | 23 | 13 C      | 0.0003278  |
| rs10918046  | 1 | 164526190 G            | 11 | 1 A       | 0.00009775 |
| rs531650    | 1 | 170657994 C            | 8  | 40 T      | 0.0002504  |
| 1:172569838 | 1 | 172569838 A            | 13 | 3 G       | 0.0002409  |
| rs570762    | 1 | 177890153 T            | 12 | 45 C      | 0.0009266  |
| rs6424946   | 1 | 184290191 T            | 20 | 11 C      | 0.0008202  |
| rs138042176 | 1 | 186630884 GT           | 5  | 31 G      | 0.0006549  |
| rs5277      | 1 | 186648197 G            | 3  | 25 C      | 0.0009258  |
| rs4549996   | 1 | 186707043 C            | 2  | 29 G      | 0.000017   |
| rs200743165 | 1 | 188832851 T            | 7  | 0 G       | 0.000891   |
| rs72060837  | 1 | 194371558 A            | 4  | 28 ATAATG | 0.0008078  |
| rs3010141   | 1 | 195854742 T            | 3  | 25 C      | 0.0009258  |
| rs2923886   | 1 | 195855359 G            | 3  | 26 C      | 0.0005074  |
| rs68003289  | 1 | 195858334 GGAAGATGAATA | 3  | 26 G      | 0.0005074  |
| rs3010143   | 1 | 195859677 C            | 3  | 26 T      | 0.0005074  |
| rs11324284  | 1 | 195860011 TA           | 3  | 26 T      | 0.0005074  |
| rs1451913   | 1 | 195863634 A            | 3  | 26 G      | 0.0005074  |
| rs3008578   | 1 | 195864604 A            | 3  | 26 T      | 0.0005074  |
| rs2923881   | 1 | 195867105 A            | 3  | 26 G      | 0.0005074  |
| rs3010144   | 1 | 195867138 G            | 3  | 26 T      | 0.0005074  |
| rs2923880   | 1 | 195868109 A            | 3  | 26 G      | 0.0005074  |
| rs3008576   | 1 | 195869123 T            | 3  | 26 C      | 0.0005074  |
| rs3008575   | 1 | 195869526 T            | 3  | 26 A      | 0.0005074  |
| rs3010146   | 1 | 195870879 G            | 3  | 26 A      | 0.0005074  |
| rs3010147   | 1 | 195871839 C            | 6  | 33 T      | 0.0009098  |
| rs3010149   | 1 | 195872456 C            | 3  | 25 T      | 0.0009258  |
| rs3010150   | 1 | 195873063 C            | 3  | 26 T      | 0.0005074  |
| rs3008573   | 1 | 195874388 A            | 3  | 25 C      | 0.0009258  |

|             |   |               |    |                       |            |
|-------------|---|---------------|----|-----------------------|------------|
| rs1451920   | 1 | 195874790 T   | 6  | 33 A                  | 0.0009098  |
| rs2123080   | 1 | 195874856 C   | 3  | 26 T                  | 0.0005074  |
| rs2167518   | 1 | 195874907 A   | 3  | 26 G                  | 0.0005074  |
| rs5779820   | 1 | 195875053 AT  | 3  | 26 A                  | 0.0005074  |
| rs3010151   | 1 | 195876205 T   | 3  | 26 C                  | 0.0005074  |
| rs3010152   | 1 | 195876254 T   | 6  | 33 A                  | 0.0009098  |
| rs3008572   | 1 | 195876292 C   | 3  | 26 T                  | 0.0005074  |
| rs3008571   | 1 | 195876392 C   | 3  | 25 T                  | 0.0009258  |
| rs3008570   | 1 | 195876537 A   | 6  | 33 T                  | 0.0009098  |
| rs3008569   | 1 | 195876542 C   | 3  | 26 T                  | 0.0005074  |
| rs2923904   | 1 | 195877044 A   | 3  | 26 G                  | 0.0005074  |
| rs5779821   | 1 | 195877194 AT  | 6  | 33 A                  | 0.0009098  |
| rs5779822   | 1 | 195877296 T   | 3  | 26 TAA                | 0.0005074  |
| rs3008549   | 1 | 195880550 A   | 3  | 26 T                  | 0.0005074  |
| rs3008550   | 1 | 195880622 G   | 3  | 26 C                  | 0.0005074  |
| rs3008551   | 1 | 195880830 C   | 3  | 26 T                  | 0.0005074  |
| rs3008552   | 1 | 195881459 G   | 3  | 26 A                  | 0.0005074  |
| 1:196477349 | 1 | 196477349 A   | 0  | 16 G                  | 0.0005214  |
| 1:197957887 | 1 | 197957887 TA  | 0  | 15 T                  | 0.0005628  |
| 1:198804284 | 1 | 198804284 A   | 6  | 34 AG                 | 0.0004884  |
| 1:198804286 | 1 | 198804286 A   | 6  | 35 G                  | 0.0002765  |
| 1:198804287 | 1 | 198804287 A   | 6  | 34 AAGGAAGGAAGGAAGGAA | 0.0004884  |
| rs78607681  | 1 | 200668908 G   | 9  | 0 A                   | 0.0001034  |
| rs113906106 | 1 | 200670819 T   | 10 | 0 C                   | 0.00003497 |
| rs113122215 | 1 | 200712919 G   | 8  | 0 A                   | 0.0003016  |
| rs200517518 | 1 | 201100129 A   | 26 | 18 AT                 | 0.0007809  |
| rs200108640 | 1 | 201100133 A   | 26 | 18 T                  | 0.0007809  |
| rs61136828  | 1 | 202167795 G   | 16 | 5 GGTTTTTTTTTTT       | 0.0001864  |
| rs199940288 | 1 | 203750337 A   | 9  | 0 AAAG                | 0.0001214  |
| rs71568011  | 1 | 204013671 AAG | 16 | 7 A                   | 0.0009539  |
| rs12046258  | 1 | 204039160 A   | 18 | 8 G                   | 0.0005897  |
| rs77321629  | 1 | 204042433 G   | 18 | 8 T                   | 0.0005897  |
| rs17404301  | 1 | 204047520 A   | 18 | 8 G                   | 0.0005897  |
| rs71568016  | 1 | 204049014 G   | 18 | 8 GCCT                | 0.0005897  |
| rs12117788  | 1 | 204049200 A   | 18 | 8 G                   | 0.0005897  |
| rs12727635  | 1 | 204052988 G   | 18 | 8 C                   | 0.0005897  |
| rs34618698  | 1 | 204056948 A   | 13 | 2 G                   | 0.00006438 |
| rs59065201  | 1 | 204067376 T   | 20 | 11 C                  | 0.0008202  |
| rs61825739  | 1 | 204067474 A   | 14 | 5 G                   | 0.0008508  |
| rs12034981  | 1 | 204069237 A   | 15 | 5 C                   | 0.0003715  |
| rs7539399   | 1 | 204590044 G   | 6  | 32 A                  | 0.00098    |

|             |   |             |    |                       |           |
|-------------|---|-------------|----|-----------------------|-----------|
| rs7551222   | 1 | 204599295 G | 6  | 34 A                  | 0.0005004 |
| rs7553683   | 1 | 204599461 G | 6  | 34 A                  | 0.0005004 |
| rs4951084   | 1 | 204606974 C | 6  | 33 G                  | 0.0009098 |
| rs12024827  | 1 | 204607874 T | 12 | 47 C                  | 0.0004795 |
| rs4951085   | 1 | 204608284 C | 12 | 47 G                  | 0.0004795 |
| rs4951086   | 1 | 204608643 T | 8  | 42 C                  | 0.0000745 |
| rs4951087   | 1 | 204609194 A | 12 | 47 G                  | 0.0004795 |
| rs4950954   | 1 | 204610475 G | 12 | 47 A                  | 0.0004795 |
| rs4951088   | 1 | 204610780 T | 12 | 47 C                  | 0.0004795 |
| rs4951089   | 1 | 204610898 T | 12 | 47 C                  | 0.0004795 |
| rs138881554 | 1 | 204611658 C | 12 | 47 CAAGGGAGGG         | 0.0004795 |
| rs11240234  | 1 | 204612138 T | 12 | 47 C                  | 0.0004795 |
| rs11240235  | 1 | 204612200 T | 12 | 47 C                  | 0.0004795 |
| rs11240236  | 1 | 204612463 T | 12 | 47 G                  | 0.0004795 |
| rs11240237  | 1 | 204612518 A | 12 | 47 G                  | 0.0004795 |
| rs11240238  | 1 | 204612537 T | 12 | 47 C                  | 0.0004795 |
| rs11240239  | 1 | 204612804 A | 12 | 47 G                  | 0.0004795 |
| rs4279904   | 1 | 204613764 A | 9  | 45 G                  | 0.0000477 |
| rs10900418  | 1 | 204614166 T | 9  | 45 C                  | 0.0000477 |
| rs2772227   | 1 | 204615400 T | 8  | 41 A                  | 0.0001361 |
| rs1329631   | 1 | 204616390 G | 12 | 45 A                  | 0.0009266 |
| rs12127178  | 1 | 204620354 A | 12 | 47 G                  | 0.0004795 |
| rs2772244   | 1 | 204621178 G | 9  | 44 A                  | 0.0000882 |
| rs2492985   | 1 | 204621247 A | 9  | 44 G                  | 0.0000882 |
| rs880497    | 1 | 204622214 C | 12 | 45 G                  | 0.0009266 |
| rs2480467   | 1 | 204624957 A | 10 | 43 G                  | 0.0003854 |
| rs1120599   | 1 | 209670782 T | 8  | 39 C                  | 0.0004628 |
| rs1011398   | 1 | 209705895 T | 6  | 34 C                  | 0.0005004 |
| rs11119358  | 1 | 210042456 C | 2  | 26 T                  | 0.0001452 |
| rs2064163   | 1 | 210048819 T | 3  | 27 G                  | 0.0002808 |
| rs2143545   | 1 | 210062667 C | 15 | 51 T                  | 0.0006974 |
| rs12078439  | 1 | 210075260 G | 37 | 34 T                  | 0.0006983 |
| rs34704551  | 1 | 210107045 C | 25 | 15 A                  | 0.0002543 |
| rs66736737  | 1 | 210109844 G | 24 | 15 GAGTCTCCTGGACAAATA | 0.0005235 |
| rs6657016   | 1 | 210114848 A | 24 | 15 T                  | 0.0005235 |
| rs34931444  | 1 | 210125122 G | 25 | 15 A                  | 0.0002543 |
| rs10779516  | 1 | 210128127 T | 37 | 34 C                  | 0.0006983 |
| rs56131913  | 1 | 210146047 C | 25 | 15 T                  | 0.0002543 |
| rs75456071  | 1 | 210159801 T | 23 | 14 A                  | 0.0007414 |
| rs11590161  | 1 | 210165928 C | 23 | 14 G                  | 0.0007414 |
| rs61820396  | 1 | 210167102 G | 23 | 14 C                  | 0.0007414 |

|            |   |                   |    |               |           |
|------------|---|-------------------|----|---------------|-----------|
| rs7543650  | 1 | 210170975 T       | 23 | 14 A          | 0.0007414 |
| rs12750599 | 1 | 210173234 C       | 23 | 14 T          | 0.0007414 |
| rs34076794 | 1 | 210174598 A       | 23 | 14 AT         | 0.0007414 |
| rs12401646 | 1 | 210182369 G       | 23 | 14 A          | 0.0007414 |
| rs61820397 | 1 | 210189249 A       | 23 | 14 G          | 0.0007414 |
| rs71571925 | 1 | 210197923 C       | 23 | 14 CA         | 0.0007414 |
| rs17318612 | 1 | 210206179 T       | 23 | 14 A          | 0.0007414 |
| rs61826848 | 1 | 210220847 G       | 23 | 14 A          | 0.0007414 |
| rs17318744 | 1 | 210244470 G       | 23 | 14 A          | 0.0007414 |
| rs2484034  | 1 | 210254787 A       | 23 | 14 G          | 0.0007414 |
| rs2451696  | 1 | 210282346 T       | 25 | 14 G          | 0.0001947 |
| rs2451697  | 1 | 210284025 G       | 25 | 14 A          | 0.0001947 |
| rs2484033  | 1 | 210287837 A       | 25 | 14 G          | 0.0001947 |
| rs2484030  | 1 | 210296910 G       | 25 | 14 T          | 0.0001947 |
| rs2484031  | 1 | 210303614 C       | 25 | 14 A          | 0.0001947 |
| rs35028401 | 1 | 210317184 C       | 14 | 5 T           | 0.0008508 |
| rs6660244  | 1 | 210379156 A       | 11 | 2 G           | 0.0004434 |
| rs17757020 | 1 | 210396557 T       | 11 | 2 C           | 0.0004434 |
| rs12026739 | 1 | 210431517 T       | 11 | 2 C           | 0.0004434 |
| rs12044365 | 1 | 210431761 G       | 11 | 2 A           | 0.0004434 |
| rs34285465 | 1 | 210439000 T       | 11 | 2 G           | 0.0004434 |
| rs55673030 | 1 | 210449901 T       | 11 | 2 C           | 0.0004434 |
| rs12069491 | 1 | 210460899 G       | 2  | 22 A          | 0.0009583 |
| rs12070628 | 1 | 210460909 C       | 2  | 22 T          | 0.0009583 |
| rs79578370 | 1 | 210462978 G       | 2  | 21 GTGTAATTCC | 0.0009745 |
| rs590380   | 1 | 210463071 A       | 2  | 23 G          | 0.0005167 |
| rs689248   | 1 | 210463122 T       | 2  | 23 C          | 0.0005167 |
| rs11453134 | 1 | 210463173 CT      | 2  | 23 C          | 0.0005167 |
| rs588197   | 1 | 210463515 T       | 2  | 23 A          | 0.0005167 |
| rs583148   | 1 | 210463553 C       | 2  | 23 A          | 0.0005167 |
| rs587203   | 1 | 210463786 A       | 2  | 23 G          | 0.0005167 |
| rs61621397 | 1 | 210463870 G       | 2  | 23 GAA        | 0.0005167 |
| rs608791   | 1 | 210464638 T       | 2  | 23 C          | 0.0005167 |
| rs652256   | 1 | 210465017 C       | 2  | 23 T          | 0.0005167 |
| rs652241   | 1 | 210465029 T       | 2  | 23 A          | 0.0005167 |
| rs650854   | 1 | 210465315 C       | 2  | 23 G          | 0.0005167 |
| rs5780569  | 1 | 210465434 ATATAAT | 2  | 24 A          | 0.0002818 |
| rs1338290  | 1 | 210465467 A       | 2  | 24 G          | 0.0002818 |
| rs635084   | 1 | 210466625 A       | 20 | 10 G          | 0.0005561 |
| rs639095   | 1 | 210466818 A       | 20 | 10 T          | 0.0005561 |
| rs12030512 | 1 | 210466886 G       | 2  | 25 A          | 0.0001556 |

|             |   |                   |    |                         |            |
|-------------|---|-------------------|----|-------------------------|------------|
| rs7516171   | 1 | 210466932 T       | 20 | 10 C                    | 0.0005561  |
| rs7416272   | 1 | 210467425 A       | 20 | 9 G                     | 0.0002046  |
| rs12030856  | 1 | 210471463 G       | 2  | 25 T                    | 0.0001556  |
| rs58366398  | 1 | 210471924 A       | 2  | 25 G                    | 0.0001556  |
| rs12040684  | 1 | 210472053 T       | 2  | 25 C                    | 0.0001556  |
| rs12074229  | 1 | 210474602 G       | 2  | 25 A                    | 0.0001556  |
| rs12034871  | 1 | 210475701 C       | 2  | 25 T                    | 0.0001556  |
| rs2057044   | 1 | 210477579 T       | 20 | 10 A                    | 0.0005561  |
| rs61848993  | 1 | 211095666 T       | 27 | 20 C                    | 0.0008778  |
| rs10494947  | 1 | 212089141 A       | 7  | 0 C                     | 0.0008679  |
| rs562410    | 1 | 215139180 C       | 16 | 55 T                    | 0.0003306  |
| rs476557    | 1 | 215140251 C       | 14 | 52 A                    | 0.0001845  |
| rs507072    | 1 | 215140520 C       | 14 | 53 T                    | 0.0001565  |
| rs11120456  | 1 | 215142401 C       | 10 | 50 A                    | 0.00001223 |
| rs487208    | 1 | 215143278 A       | 13 | 53 G                    | 0.00004294 |
| rs1890007   | 1 | 215146411 T       | 13 | 52 A                    | 0.0000799  |
| rs864736    | 1 | 215150260 A       | 16 | 54 C                    | 0.0003907  |
| rs543029    | 1 | 215151063 A       | 16 | 54 G                    | 0.0003907  |
| rs495296    | 1 | 215153348 C       | 16 | 55 T                    | 0.0003306  |
| rs1452632   | 1 | 215154120 A       | 13 | 52 C                    | 0.0000799  |
| rs6681013   | 1 | 215154797 G       | 13 | 52 C                    | 0.0000799  |
| rs566980    | 1 | 218295397 A       | 9  | 1 G                     | 0.0007194  |
| rs12403383  | 1 | 218296752 A       | 12 | 2 C                     | 0.0001711  |
| rs75332983  | 1 | 218302164 A       | 12 | 2 G                     | 0.0001711  |
| rs12033297  | 1 | 218302651 T       | 12 | 2 C                     | 0.0001711  |
| rs12045142  | 1 | 218305929 A       | 11 | 2 G                     | 0.0004434  |
| rs74226968  | 1 | 218311278 A       | 12 | 2 T                     | 0.0001711  |
| rs2069094   | 1 | 218313036 A       | 11 | 2 G                     | 0.0004434  |
| rs146197820 | 1 | 220565631 TC      | 31 | 24 T                    | 0.0004543  |
| rs72760323  | 1 | 224767537 A       | 0  | 16 G                    | 0.0005294  |
| rs6672413   | 1 | 224817129 C       | 3  | 25 T                    | 0.0009258  |
| rs6672806   | 1 | 224817506 A       | 3  | 25 T                    | 0.0009258  |
| 1:226417566 | 1 | 226417566 GGT     | 8  | 0 G                     | 0.0003016  |
| 1:228614740 | 1 | 228614740 C       | 31 | 25 CT                   | 0.0003995  |
| 1:228614744 | 1 | 228614744 C       | 31 | 25 CTCCTCCCTCCCTTCCTTTC | 0.0003995  |
| rs6656666   | 1 | 233635440 T       | 12 | 45 A                    | 0.0009266  |
| rs597474    | 1 | 234450288 C       | 8  | 38 G                    | 0.0005059  |
| rs149002825 | 1 | 234518776 AGAGAAG | 8  | 42 A                    | 0.0002193  |
| rs10797542  | 1 | 234562268 A       | 9  | 1 G                     | 0.0007194  |
| rs10797543  | 1 | 234562287 G       | 9  | 1 A                     | 0.0007194  |
| rs10910434  | 1 | 234563556 A       | 9  | 1 T                     | 0.0007194  |

|             |   |               |    |                       |           |
|-------------|---|---------------|----|-----------------------|-----------|
| rs10797546  | 1 | 234564011 G   | 9  | 1 A                   | 0.0007194 |
| rs10797547  | 1 | 234564203 T   | 9  | 1 C                   | 0.0007194 |
| rs10797548  | 1 | 234564205 C   | 9  | 1 G                   | 0.0007194 |
| rs71701823  | 1 | 234564864 G   | 9  | 1 GAA                 | 0.0007194 |
| rs915184    | 1 | 234565787 A   | 9  | 1 G                   | 0.0007194 |
| rs2236587   | 1 | 234566085 G   | 9  | 1 A                   | 0.0007194 |
| rs72632290  | 1 | 234566681 T   | 9  | 1 C                   | 0.0007194 |
| rs10910435  | 1 | 234566943 C   | 9  | 1 T                   | 0.0007194 |
| rs10910436  | 1 | 234567301 G   | 9  | 1 C                   | 0.0007194 |
| rs10797549  | 1 | 234567581 A   | 9  | 1 G                   | 0.0007194 |
| rs12024737  | 1 | 234568101 T   | 9  | 1 C                   | 0.0007194 |
| rs12045698  | 1 | 234568114 A   | 9  | 1 G                   | 0.0007194 |
| rs12045759  | 1 | 234568264 A   | 9  | 1 G                   | 0.0007194 |
| rs74308430  | 1 | 234568685 TC  | 9  | 1 T                   | 0.0007194 |
| rs112979975 | 1 | 234569032 AC  | 9  | 1 A                   | 0.0007194 |
| rs3754311   | 1 | 234569192 C   | 9  | 1 T                   | 0.0007194 |
| rs12026726  | 1 | 234569772 A   | 9  | 1 C                   | 0.0007194 |
| rs12048608  | 1 | 234570889 A   | 9  | 1 G                   | 0.0007194 |
| rs112010867 | 1 | 234571123 CGG | 9  | 1 C                   | 0.0007194 |
| rs12047138  | 1 | 234571854 A   | 9  | 1 T                   | 0.0007194 |
| rs12028777  | 1 | 234571886 T   | 9  | 1 C                   | 0.0007194 |
| rs12049594  | 1 | 234571888 A   | 9  | 1 G                   | 0.0007194 |
| rs12046432  | 1 | 234571928 G   | 9  | 1 A                   | 0.0007194 |
| rs12064512  | 1 | 234574937 G   | 9  | 1 C                   | 0.0007194 |
| rs13374387  | 1 | 234576405 A   | 9  | 1 C                   | 0.0007194 |
| 1:238178375 | 1 | 238178375 G   | 11 | 2 T                   | 0.0004434 |
| rs113242973 | 1 | 238957843 G   | 7  | 0 A                   | 0.0008062 |
| rs60728123  | 1 | 240279926 T   | 16 | 7 C                   | 0.0009539 |
| rs6656703   | 1 | 242539132 G   | 18 | 9 A                   | 0.0009279 |
| rs6429351   | 1 | 242541697 C   | 18 | 9 T                   | 0.0009279 |
| rs60251166  | 1 | 242543844 G   | 18 | 9 A                   | 0.0009279 |
| rs11485478  | 1 | 248502769 T   | 2  | 22 C                  | 0.0009583 |
| 2:582907    | 2 | 582907 A      | 7  | 0 AAAGAAGCTCCACGCAGCG | 0.0008679 |
| rs12714409  | 2 | 596532 T      | 13 | 4 C                   | 0.000883  |
| rs12999227  | 2 | 597382 T      | 13 | 4 C                   | 0.000883  |
| 2:722604    | 2 | 722604 TTATG  | 1  | 21 T                  | 0.0004716 |
| rs7576110   | 2 | 758088 G      | 18 | 9 C                   | 0.0009279 |
| rs2674225   | 2 | 2591136 C     | 24 | 14 G                  | 0.0003806 |
| rs202066201 | 2 | 3528553 C     | 23 | 14 CTT                | 0.0007414 |
| rs7583559   | 2 | 15866020 G    | 22 | 11 C                  | 0.0001874 |
| rs2380671   | 2 | 15867707 G    | 23 | 12 A                  | 0.0002434 |

|             |   |            |    |        |           |
|-------------|---|------------|----|--------|-----------|
| rs4668964   | 2 | 15867762 T | 20 | 11 C   | 0.0008202 |
| rs4668965   | 2 | 15868003 C | 19 | 9 T    | 0.0004395 |
| rs11096512  | 2 | 18295234 T | 23 | 13 C   | 0.0003278 |
| rs1653773   | 2 | 23735843 G | 37 | 34 A   | 0.0006983 |
| rs10203512  | 2 | 23736637 G | 37 | 34 A   | 0.0006983 |
| rs1653775   | 2 | 23737302 G | 37 | 34 C   | 0.0006983 |
| rs12712975  | 2 | 23741410 A | 27 | 19 G   | 0.0008555 |
| rs1275984   | 2 | 26911509 A | 32 | 26 C   | 0.0008799 |
| rs1275986   | 2 | 26912079 C | 33 | 27 A   | 0.0005258 |
| rs736699    | 2 | 26913930 A | 32 | 26 G   | 0.0008799 |
| rs935168    | 2 | 26914787 G | 32 | 23 A   | 0.0001132 |
| rs34004783  | 2 | 26916846 C | 31 | 23 G   | 0.0003729 |
| rs1275977   | 2 | 26922855 G | 31 | 23 A   | 0.0003729 |
| rs13394970  | 2 | 26929282 T | 33 | 27 G   | 0.0005258 |
| rs1731243   | 2 | 26930411 C | 33 | 28 T   | 0.0009909 |
| rs2586886   | 2 | 26932031 C | 33 | 28 T   | 0.0009909 |
| rs1275923   | 2 | 26932796 C | 33 | 28 T   | 0.0009909 |
| rs71446010  | 2 | 31859714 C | 1  | 19 T   | 0.0008417 |
| rs35890136  | 2 | 32861027 G | 5  | 33 T   | 0.0002023 |
| rs72864592  | 2 | 35747234 A | 20 | 11 G   | 0.0008202 |
| rs4670667   | 2 | 37392402 C | 8  | 37 A   | 0.0008686 |
| rs28428996  | 2 | 37393941 C | 8  | 38 T   | 0.0005059 |
| rs151238316 | 2 | 37678662 T | 16 | 7 TTTG | 0.0009539 |
| rs150795296 | 2 | 38311413 G | 15 | 52 A   | 0.0006042 |
| rs162332    | 2 | 38322361 A | 15 | 52 G   | 0.0006042 |
| rs62141389  | 2 | 41019721 T | 13 | 47 C   | 0.0009845 |
| rs56100439  | 2 | 41021497 A | 13 | 47 C   | 0.0009845 |
| rs2280220   | 2 | 45391901 G | 21 | 12 A   | 0.0009318 |
| rs1922043   | 2 | 47794960 C | 2  | 22 T   | 0.0009583 |
| rs145653565 | 2 | 52269404 C | 11 | 43 A   | 0.0008678 |
| rs140336606 | 2 | 52271010 A | 8  | 37 G   | 0.0008686 |
| rs372996983 | 2 | 52271700 T | 7  | 38 C   | 0.0001991 |
| rs184082143 | 2 | 52271831 A | 11 | 43 C   | 0.0008678 |
| rs36138953  | 2 | 52272508 T | 10 | 42 C   | 0.0006808 |
| rs34393418  | 2 | 52274004 C | 9  | 40 G   | 0.000591  |
| rs13015554  | 2 | 52274513 T | 11 | 43 C   | 0.0008678 |
| rs13429833  | 2 | 52276727 T | 10 | 42 C   | 0.0006808 |
| rs10164955  | 2 | 52277943 T | 10 | 42 C   | 0.0006808 |
| rs4504033   | 2 | 52280819 G | 9  | 40 C   | 0.000591  |
| rs12472125  | 2 | 52281116 A | 11 | 43 T   | 0.0008678 |
| rs7559419   | 2 | 52284070 G | 11 | 43 A   | 0.0008678 |



|             |   |             |    |       |           |
|-------------|---|-------------|----|-------|-----------|
| rs10177709  | 2 | 52284768 G  | 11 | 43 A  | 0.0008678 |
| rs12612665  | 2 | 54908210 A  | 31 | 25 G  | 0.0008555 |
| rs72618666  | 2 | 54919369 G  | 31 | 24 T  | 0.0004543 |
| rs72618668  | 2 | 54919594 G  | 31 | 24 A  | 0.0004543 |
| rs6749785   | 2 | 56049242 G  | 16 | 53 T  | 0.0006806 |
| rs7426380   | 2 | 56095010 G  | 16 | 53 A  | 0.0006806 |
| rs2192515   | 2 | 60050857 G  | 12 | 45 A  | 0.0009266 |
| 2:60676657  | 2 | 60676657 C  | 2  | 25 T  | 0.0002841 |
| rs10165560  | 2 | 62059398 C  | 4  | 28 A  | 0.0008901 |
| rs115595309 | 2 | 67226030 A  | 11 | 2 C   | 0.0004434 |
| rs112889343 | 2 | 74647099 A  | 11 | 2 G   | 0.0004434 |
| rs61311422  | 2 | 75386176 CT | 13 | 47 C  | 0.0009845 |
| rs3771843   | 2 | 75386776 C  | 11 | 46 A  | 0.0002401 |
| rs3821317   | 2 | 75386811 G  | 13 | 47 C  | 0.0009845 |
| rs17640500  | 2 | 75386860 G  | 12 | 46 A  | 0.0005428 |
| rs10194954  | 2 | 75386871 C  | 12 | 46 T  | 0.0005428 |
| rs10207441  | 2 | 75386881 T  | 12 | 46 C  | 0.0005428 |
| rs3771844   | 2 | 75386925 T  | 12 | 46 C  | 0.0005428 |
| rs3821318   | 2 | 75387311 T  | 12 | 45 C  | 0.0009266 |
| rs10198644  | 2 | 75388053 G  | 12 | 45 C  | 0.0009266 |
| rs10177213  | 2 | 75388125 A  | 12 | 45 G  | 0.0009266 |
| rs12713834  | 2 | 75391100 A  | 11 | 45 G  | 0.0004315 |
| rs2058859   | 2 | 75391574 G  | 12 | 45 A  | 0.0009266 |
| rs2216307   | 2 | 75392831 T  | 5  | 34 C  | 0.0001138 |
| rs11886595  | 2 | 75681052 C  | 16 | 6 T   | 0.0005436 |
| 2:76593575  | 2 | 76593575 C  | 9  | 0 T   | 0.0001173 |
| rs954491    | 2 | 76964356 G  | 1  | 19 T  | 0.0008417 |
| 2:81108696  | 2 | 81108696 C  | 7  | 0 CAT | 0.0008679 |
| rs10175174  | 2 | 85287948 T  | 28 | 20 C  | 0.0005398 |
| rs4019832   | 2 | 85296388 A  | 32 | 24 G  | 0.0002243 |
| rs113625787 | 2 | 85296601 A  | 31 | 23 G  | 0.0003995 |
| rs55869261  | 2 | 85298955 C  | 32 | 24 T  | 0.0002243 |
| rs62162805  | 2 | 85300366 A  | 32 | 24 C  | 0.0002243 |
| rs1975130   | 2 | 85301540 A  | 32 | 24 T  | 0.0002243 |
| rs59640363  | 2 | 85304912 C  | 32 | 25 T  | 0.0004454 |
| rs4832133   | 2 | 85305903 C  | 32 | 24 G  | 0.0002243 |
| rs11890007  | 2 | 85306122 G  | 32 | 24 A  | 0.0002243 |
| rs146964623 | 2 | 85307222 T  | 32 | 24 TC | 0.0002243 |
| rs113625990 | 2 | 85307290 G  | 32 | 24 C  | 0.0002243 |
| rs62162807  | 2 | 85307445 A  | 31 | 23 G  | 0.0003729 |
| rs13430659  | 2 | 85308534 T  | 32 | 24 C  | 0.0002243 |

|             |   |                          |    |          |            |
|-------------|---|--------------------------|----|----------|------------|
| rs13393644  | 2 | 85308872 C               | 32 | 24 T     | 0.0002243  |
| rs12714136  | 2 | 85310080 G               | 32 | 26 A     | 0.0008799  |
| 2:85571001  | 2 | 85571001 G               | 7  | 0 A      | 0.0008679  |
| rs6724470   | 2 | 85571005 T               | 7  | 0 A      | 0.0008679  |
| 2:91737945  | 2 | 91737945 ATTTTCATCTCATC/ | 14 | 4 A      | 0.0003939  |
| rs75746990  | 2 | 92166963 A               | 13 | 4 T      | 0.000883   |
| rs201649520 | 2 | 92316009 A               | 13 | 4 G      | 0.000981   |
| 2:100271679 | 2 | 100271679 G              | 28 | 18 C     | 0.0001825  |
| 2:127729242 | 2 | 127729242 AGACCAGCCCTGT  | 13 | 4 A      | 0.000883   |
| rs13416459  | 2 | 129864010 G              | 18 | 8 A      | 0.0005897  |
| rs56009990  | 2 | 129864416 A              | 18 | 8 G      | 0.0005897  |
| 2:130676946 | 2 | 130676946 A              | 13 | 4 G      | 0.000883   |
| rs62165681  | 2 | 134908823 T              | 11 | 2 G      | 0.0004434  |
| rs76856516  | 2 | 136739259 T              | 8  | 0 G      | 0.0003372  |
| rs7597859   | 2 | 141237995 G              | 9  | 1 T      | 0.0007194  |
| rs6753651   | 2 | 141239345 G              | 9  | 1 A      | 0.0007194  |
| rs76407510  | 2 | 146348200 T              | 1  | 19 C     | 0.0008417  |
| rs75823384  | 2 | 146353540 C              | 1  | 19 T     | 0.0008417  |
| rs12615318  | 2 | 146354167 A              | 1  | 19 C     | 0.0008417  |
| rs75180379  | 2 | 146356926 T              | 1  | 19 G     | 0.0008417  |
| rs78270796  | 2 | 146364506 G              | 1  | 19 A     | 0.0008417  |
| rs77283667  | 2 | 146368972 A              | 1  | 19 T     | 0.0008417  |
| rs115248214 | 2 | 146373817 G              | 1  | 19 A     | 0.0008417  |
| rs74769191  | 2 | 146377138 G              | 1  | 19 A     | 0.0008417  |
| rs6707541   | 2 | 146378480 A              | 1  | 19 G     | 0.0008417  |
| rs2381750   | 2 | 146382236 T              | 1  | 19 G     | 0.0008417  |
| rs79180145  | 2 | 146388853 A              | 1  | 19 C     | 0.0008417  |
| rs12995143  | 2 | 148965908 T              | 28 | 20 C     | 0.0005398  |
| rs4972338   | 2 | 148974872 T              | 30 | 21 A     | 0.0001793  |
| rs11685302  | 2 | 148980230 T              | 30 | 21 C     | 0.0001793  |
| rs10432369  | 2 | 148982641 A              | 30 | 19 C     | 0.00006044 |
| rs368079176 | 2 | 148982873 T              | 30 | 19 TAAAC | 0.00006044 |
| rs2167127   | 2 | 148983394 T              | 30 | 21 C     | 0.0001793  |
| rs12691780  | 2 | 148983760 C              | 30 | 21 T     | 0.0001793  |
| rs4399670   | 2 | 148985774 C              | 30 | 19 G     | 0.00006044 |
| rs142457231 | 2 | 148985860 C              | 30 | 21 A     | 0.0001793  |
| rs12691781  | 2 | 148987013 A              | 30 | 21 T     | 0.0001793  |
| rs10928388  | 2 | 148987453 A              | 30 | 21 G     | 0.0001793  |
| rs7570104   | 2 | 148988832 G              | 30 | 21 A     | 0.0001793  |
| rs34002489  | 2 | 148989115 CT             | 30 | 21 C     | 0.0001793  |
| rs2044760   | 2 | 148989731 T              | 30 | 21 C     | 0.0001793  |

|             |   |               |    |        |            |
|-------------|---|---------------|----|--------|------------|
| rs2044761   | 2 | 148989742 A   | 30 | 21 G   | 0.0001793  |
| rs987626    | 2 | 148990144 T   | 30 | 19 G   | 0.00006044 |
| rs987625    | 2 | 148990155 C   | 30 | 19 G   | 0.00006044 |
| rs1449960   | 2 | 148990179 G   | 30 | 21 A   | 0.0001793  |
| rs7572948   | 2 | 148992803 C   | 30 | 19 A   | 0.00006044 |
| rs13022005  | 2 | 148993822 A   | 30 | 19 T   | 0.00006044 |
| rs2839755   | 2 | 148993952 C   | 30 | 19 T   | 0.00006044 |
| rs13001946  | 2 | 148994598 G   | 30 | 19 A   | 0.00006044 |
| rs374750204 | 2 | 148996565 CAT | 31 | 22 C   | 0.0001772  |
| rs7575333   | 2 | 148996571 C   | 31 | 20 T   | 0.00004024 |
| rs6721794   | 2 | 148999403 C   | 30 | 21 T   | 0.0001793  |
| rs10598345  | 2 | 149000901 A   | 30 | 19 ATT | 0.00006044 |
| rs17274896  | 2 | 149001029 C   | 30 | 19 A   | 0.00006044 |
| rs10928389  | 2 | 149002181 A   | 30 | 21 T   | 0.0001793  |
| rs13027785  | 2 | 149003522 A   | 30 | 21 C   | 0.0001793  |
| rs70992200  | 2 | 149005231 A   | 30 | 21 ACT | 0.0001793  |
| rs11692246  | 2 | 149005881 C   | 30 | 19 T   | 0.00006044 |
| rs11676308  | 2 | 149006021 G   | 30 | 19 A   | 0.00006044 |
| rs10210377  | 2 | 149007885 T   | 30 | 21 C   | 0.0001793  |
| rs13425594  | 2 | 149009833 G   | 30 | 21 A   | 0.0001793  |
| rs1453318   | 2 | 149010800 G   | 30 | 19 A   | 0.00006044 |
| rs6746932   | 2 | 149012777 C   | 30 | 19 T   | 0.00006044 |
| rs2084954   | 2 | 149014250 T   | 31 | 22 C   | 0.0001772  |
| rs35042809  | 2 | 149015017 C   | 31 | 22 T   | 0.0001772  |
| rs2890917   | 2 | 149015704 T   | 31 | 24 A   | 0.0004543  |
| rs13032996  | 2 | 149016812 C   | 31 | 22 A   | 0.0001772  |
| rs1120671   | 2 | 149018605 G   | 31 | 24 A   | 0.0004543  |
| rs6430305   | 2 | 149019608 T   | 31 | 24 A   | 0.0004543  |
| rs11452364  | 2 | 149023500 G   | 30 | 21 GA  | 0.0001793  |
| rs961207    | 2 | 149024933 A   | 30 | 21 G   | 0.0001793  |
| rs12053104  | 2 | 149036219 T   | 30 | 20 C   | 0.0001367  |
| rs4972277   | 2 | 149039379 T   | 30 | 20 C   | 0.0001367  |
| rs147698344 | 2 | 149040112 A   | 30 | 20 AT  | 0.0001367  |
| rs11675979  | 2 | 149041386 C   | 30 | 20 A   | 0.0001367  |
| rs1869341   | 2 | 149042682 C   | 30 | 20 A   | 0.0001367  |
| rs4972347   | 2 | 149046472 A   | 30 | 20 T   | 0.0001367  |
| rs4972278   | 2 | 149046830 A   | 30 | 20 C   | 0.0001367  |
| rs11683219  | 2 | 149050998 G   | 30 | 20 A   | 0.0001367  |
| rs11678688  | 2 | 149055476 T   | 30 | 20 C   | 0.0001367  |
| rs949679    | 2 | 149061500 A   | 30 | 20 G   | 0.0001367  |
| rs4972355   | 2 | 149062824 A   | 30 | 21 G   | 0.0001793  |

|             |   |              |    |       |            |
|-------------|---|--------------|----|-------|------------|
| rs12470061  | 2 | 149063513 T  | 30 | 20 C  | 0.0001367  |
| rs2656324   | 2 | 149070920 T  | 30 | 20 C  | 0.0001367  |
| rs2656320   | 2 | 149073443 A  | 30 | 20 G  | 0.0001367  |
| rs2656319   | 2 | 149073507 A  | 30 | 20 G  | 0.0001367  |
| rs2602358   | 2 | 149077501 G  | 30 | 20 A  | 0.0001367  |
| rs2602357   | 2 | 149079445 T  | 30 | 20 C  | 0.0001367  |
| rs2656317   | 2 | 149079447 T  | 30 | 19 A  | 0.00006044 |
| rs28831467  | 2 | 149085230 G  | 30 | 20 C  | 0.0001367  |
| rs2167880   | 2 | 149086619 T  | 30 | 20 C  | 0.0001367  |
| rs17276501  | 2 | 149087536 T  | 30 | 20 C  | 0.0001367  |
| rs1453317   | 2 | 149090114 A  | 30 | 20 C  | 0.0001367  |
| rs2656325   | 2 | 149097252 G  | 30 | 20 A  | 0.0001367  |
| rs35177340  | 2 | 149100102 T  | 28 | 19 A  | 0.0002695  |
| rs2602352   | 2 | 149100152 C  | 30 | 20 T  | 0.0001367  |
| rs2938705   | 2 | 149102437 A  | 30 | 20 G  | 0.0001367  |
| rs62183965  | 2 | 149102712 A  | 28 | 19 G  | 0.0002695  |
| rs12618358  | 2 | 149105710 C  | 30 | 20 G  | 0.0001367  |
| rs869595    | 2 | 149108684 A  | 30 | 20 G  | 0.0001367  |
| rs141834862 | 2 | 149109148 C  | 30 | 20 CA | 0.0001367  |
| rs4972358   | 2 | 149110717 A  | 30 | 20 G  | 0.0001367  |
| rs10196090  | 2 | 149112792 G  | 30 | 20 T  | 0.0001367  |
| rs6734448   | 2 | 149113561 C  | 30 | 20 T  | 0.0001367  |
| rs7592019   | 2 | 149115939 C  | 30 | 19 T  | 0.00006044 |
| rs10208839  | 2 | 149116334 G  | 30 | 19 T  | 0.00006044 |
| rs2382226   | 2 | 149118062 A  | 30 | 19 G  | 0.00006044 |
| rs12478120  | 2 | 149128717 A  | 30 | 19 T  | 0.00006044 |
| rs141222971 | 2 | 149138948 T  | 30 | 17 C  | 0.00001954 |
| rs146839713 | 2 | 149140476 T  | 30 | 17 C  | 0.00001954 |
| rs141039307 | 2 | 149141219 CA | 30 | 17 C  | 0.00001954 |
| rs201766774 | 2 | 149142262 T  | 30 | 17 G  | 0.00001954 |
| rs6730847   | 2 | 149142703 G  | 30 | 17 A  | 0.00001954 |
| rs6730848   | 2 | 149142707 G  | 30 | 17 C  | 0.00001954 |
| rs6730640   | 2 | 149142724 C  | 30 | 17 T  | 0.00001954 |
| rs6745554   | 2 | 149142725 T  | 30 | 17 C  | 0.00001954 |
| rs6731266   | 2 | 149143093 G  | 30 | 17 A  | 0.00001954 |
| rs11899163  | 2 | 149143496 G  | 30 | 18 A  | 0.00002692 |
| rs12464361  | 2 | 149153361 G  | 26 | 17 C  | 0.0003852  |
| rs12469720  | 2 | 149154514 T  | 26 | 17 G  | 0.0003852  |
| rs1404187   | 2 | 149157710 A  | 26 | 17 G  | 0.0003852  |
| rs34263784  | 2 | 150554783 G  | 7  | 0 T   | 0.0008679  |
| rs35950612  | 2 | 150595052 G  | 7  | 0 A   | 0.0008679  |

|             |   |                       |    |        |            |
|-------------|---|-----------------------|----|--------|------------|
| rs35287908  | 2 | 151316181 CA          | 20 | 11 C   | 0.0008202  |
| rs16830686  | 2 | 152954035 T           | 7  | 0 C    | 0.0008679  |
| rs10203804  | 2 | 155603154 A           | 11 | 43 G   | 0.0008678  |
| rs13029130  | 2 | 158698252 T           | 3  | 25 C   | 0.0009258  |
| rs114545093 | 2 | 167790469 A           | 9  | 1 G    | 0.0007194  |
| rs116531315 | 2 | 167853218 C           | 10 | 1 T    | 0.0002681  |
| rs7591667   | 2 | 168538458 A           | 9  | 1 G    | 0.0007194  |
| rs114644345 | 2 | 170706904 A           | 7  | 0 G    | 0.0008679  |
| rs77763348  | 2 | 170778065 A           | 7  | 0 G    | 0.0008679  |
| rs115502145 | 2 | 170781206 C           | 7  | 0 T    | 0.0008679  |
| rs116794266 | 2 | 170871344 A           | 7  | 0 G    | 0.0008679  |
| rs144291934 | 2 | 170894864 T           | 7  | 0 TACC | 0.0008679  |
| rs34509009  | 2 | 171768835 AT          | 6  | 37 A   | 0.00008623 |
| rs11902360  | 2 | 171768908 G           | 7  | 39 A   | 0.0001101  |
| rs11902369  | 2 | 171768951 G           | 6  | 38 C   | 0.00003819 |
| rs2195116   | 2 | 171785428 C           | 6  | 37 T   | 0.00008623 |
| rs731693    | 2 | 171797234 A           | 9  | 40 G   | 0.000591   |
| rs4025984   | 2 | 176194225 T           | 4  | 31 C   | 0.0002188  |
| rs13032587  | 2 | 177683404 T           | 6  | 32 C   | 0.00098    |
| rs12469347  | 2 | 177688749 T           | 6  | 32 G   | 0.00098    |
| rs1517709   | 2 | 180333881 C           | 6  | 32 G   | 0.00098    |
| 2:183127685 | 2 | 183127685 TGTGTGTGTGG | 0  | 18 T   | 0.0001312  |
| rs1997131   | 2 | 185043362 A           | 0  | 15 G   | 0.0005628  |
| rs1526197   | 2 | 185050101 A           | 0  | 15 G   | 0.0005628  |
| rs6434076   | 2 | 185052186 A           | 0  | 15 C   | 0.0005628  |
| rs62176371  | 2 | 185151931 T           | 0  | 15 C   | 0.0005628  |
| rs10177272  | 2 | 185189820 A           | 0  | 14 G   | 0.0009501  |
| rs376234709 | 2 | 185196329 G           | 0  | 15 A   | 0.0005628  |
| rs2219224   | 2 | 185211739 A           | 40 | 37 G   | 0.0003306  |
| rs1378675   | 2 | 185213344 G           | 40 | 38 A   | 0.0003907  |
| rs10209231  | 2 | 185221959 T           | 7  | 35 G   | 0.0007198  |
| rs1443021   | 2 | 185226984 T           | 7  | 35 A   | 0.0007198  |
| rs4233783   | 2 | 185227769 A           | 7  | 36 T   | 0.0006639  |
| rs1596269   | 2 | 185239448 G           | 7  | 35 T   | 0.0007198  |
| rs1596270   | 2 | 185251767 T           | 7  | 35 C   | 0.0007198  |
| rs1596271   | 2 | 185251841 C           | 7  | 35 T   | 0.0007198  |
| rs1579762   | 2 | 185252515 G           | 7  | 35 A   | 0.0007198  |
| rs981091    | 2 | 185257415 G           | 7  | 35 A   | 0.0007198  |
| rs2369337   | 2 | 185264965 C           | 7  | 36 T   | 0.0006639  |
| rs2034059   | 2 | 185275344 T           | 7  | 36 A   | 0.0006639  |
| rs2034058   | 2 | 185276674 C           | 7  | 36 A   | 0.0006639  |

|             |   |               |    |               |            |
|-------------|---|---------------|----|---------------|------------|
| rs1443033   | 2 | 185277576 T   | 7  | 36 C          | 0.0006639  |
| rs10204602  | 2 | 185279087 G   | 7  | 37 A          | 0.0003628  |
| 2:196431908 | 2 | 196431908 T   | 8  | 0 TCCCGTCTCCC | 0.000247   |
| 2:203185279 | 2 | 203185279 C   | 12 | 49 T          | 0.0001424  |
| rs17248627  | 2 | 206042059 G   | 7  | 0 A           | 0.0008679  |
| rs62172730  | 2 | 206046970 T   | 7  | 0 C           | 0.0008679  |
| rs905883    | 2 | 213188470 C   | 0  | 15 T          | 0.0005628  |
| rs7565150   | 2 | 213585035 T   | 0  | 18 C          | 0.0001312  |
| rs7369041   | 2 | 213585180 G   | 0  | 15 T          | 0.0005628  |
| rs6435724   | 2 | 213585190 C   | 0  | 18 T          | 0.0001312  |
| rs11678818  | 2 | 213627986 T   | 0  | 17 C          | 0.0002606  |
| rs4143570   | 2 | 214653497 C   | 35 | 29 G          | 0.0003069  |
| rs55658550  | 2 | 214690983 T   | 32 | 25 G          | 0.0004454  |
| rs72941141  | 2 | 214723852 C   | 34 | 27 G          | 0.000994   |
| 2:214725204 | 2 | 214725204 TAG | 29 | 21 T          | 0.0006145  |
| rs7597948   | 2 | 214826315 G   | 37 | 34 T          | 0.0009371  |
| rs4674090   | 2 | 217400187 G   | 8  | 0 C           | 0.0003016  |
| rs1179733   | 2 | 217725474 G   | 5  | 34 C          | 0.0001138  |
| rs1179722   | 2 | 217733731 T   | 6  | 34 C          | 0.0005004  |
| rs35422889  | 2 | 219809760 T   | 3  | 29 C          | 0.0001425  |
| 2:224139541 | 2 | 224139541 TA  | 7  | 0 T           | 0.0008679  |
| rs10599484  | 2 | 225257525 C   | 20 | 11 CTA        | 0.0008202  |
| rs35573107  | 2 | 225834004 T   | 1  | 24 C          | 0.00006045 |
| rs59406413  | 2 | 225835800 A   | 1  | 24 C          | 0.00006045 |
| rs4674956   | 2 | 225837435 A   | 1  | 24 C          | 0.00006045 |
| rs57462780  | 2 | 225837562 C   | 1  | 24 A          | 0.00006045 |
| rs10167041  | 2 | 228123661 G   | 37 | 30 A          | 0.00008804 |
| rs4332918   | 2 | 228124702 G   | 36 | 30 A          | 0.000303   |
| rs57569440  | 2 | 228125276 GA  | 37 | 30 G          | 0.00008804 |
| rs6436670   | 2 | 228126494 C   | 13 | 48 T          | 0.0005647  |
| rs13421399  | 2 | 229022674 A   | 26 | 17 G          | 0.0003852  |
| rs75339037  | 2 | 229022874 G   | 17 | 7 A           | 0.0004382  |
| rs76762410  | 2 | 229022909 A   | 17 | 7 G           | 0.0004382  |
| rs55851318  | 2 | 230234141 G   | 11 | 2 A           | 0.0004571  |
| 2:237235440 | 2 | 237235440 T   | 18 | 8 TG          | 0.0005897  |
| rs11884821  | 2 | 238169567 G   | 7  | 0 T           | 0.0008679  |
| rs12328617  | 2 | 238173270 A   | 8  | 0 G           | 0.0003016  |
| rs11688753  | 2 | 239109823 G   | 5  | 33 T          | 0.0002023  |
| rs149600429 | 2 | 239768441 T   | 12 | 2 C           | 0.0001711  |
| rs139338240 | 2 | 239768515 T   | 12 | 2 C           | 0.0001711  |
| rs149017432 | 2 | 239769748 C   | 12 | 2 T           | 0.0001711  |

|             |   |                         |    |                        |             |
|-------------|---|-------------------------|----|------------------------|-------------|
| rs7582778   | 2 | 240350457 A             | 1  | 19 G                   | 0.0008417   |
| rs2019849   | 2 | 241048221 C             | 33 | 25 T                   | 0.0002474   |
| 2:242437342 | 2 | 242437342 C             | 9  | 1 CTGTGACTCCCACCCTCTCC | 0.0007194   |
| rs12495985  | 3 | 13142638 C              | 16 | 7 T                    | 0.0009539   |
| rs3821605   | 3 | 13625471 C              | 3  | 26 T                   | 0.0005074   |
| rs35220159  | 3 | 13631296 G              | 2  | 26 A                   | 0.0001452   |
| rs17305345  | 3 | 14285488 T              | 1  | 23 C                   | 0.0001244   |
| 3:15506747  | 3 | 15506747 ATTTATTTATTTAT | 8  | 0 A                    | 0.0003016   |
| rs6794881   | 3 | 17901388 C              | 32 | 25 T                   | 0.0004454   |
| 3:19098681  | 3 | 19098681 G              | 6  | 45 T                   | 0.000001067 |
| rs6777278   | 3 | 27663953 T              | 30 | 23 G                   | 0.0007082   |
| rs3846009   | 3 | 27668464 T              | 29 | 22 C                   | 0.0007063   |
| rs9861189   | 3 | 27673788 A              | 31 | 25 G                   | 0.0008555   |
| rs2642910   | 3 | 27676816 G              | 31 | 25 A                   | 0.0008555   |
| rs34839218  | 3 | 27676911 T              | 30 | 22 TA                  | 0.0006925   |
| rs2642911   | 3 | 27677178 G              | 31 | 25 T                   | 0.0008555   |
| rs2724544   | 3 | 27702766 C              | 29 | 22 T                   | 0.0007063   |
| rs7650346   | 3 | 27888690 T              | 11 | 2 C                    | 0.0005111   |
| 3:28983432  | 3 | 28983432 G              | 29 | 20 T                   | 0.000273    |
| 3:28983435  | 3 | 28983435 G              | 29 | 21 T                   | 0.0005775   |
| 3:29970248  | 3 | 29970248 C              | 15 | 5 CCATAACATATTTGAACCA  | 0.0003715   |
| rs4420912   | 3 | 31571327 T              | 11 | 44 A                   | 0.0007768   |
| rs73824170  | 3 | 31575172 C              | 11 | 43 G                   | 0.0008678   |
| rs7610458   | 3 | 31582238 T              | 11 | 43 G                   | 0.0008678   |
| rs6763173   | 3 | 31584438 A              | 11 | 43 T                   | 0.0008678   |
| rs4356850   | 3 | 31590065 T              | 11 | 43 A                   | 0.0008678   |
| rs10222653  | 3 | 31606923 T              | 11 | 43 G                   | 0.0008678   |
| rs9833491   | 3 | 31612235 T              | 11 | 43 C                   | 0.0008678   |
| rs35838645  | 3 | 31612854 A              | 11 | 44 C                   | 0.0007768   |
| rs10662234  | 3 | 31613426 T              | 11 | 43 TATTA               | 0.0008678   |
| rs9868487   | 3 | 31638797 G              | 11 | 43 A                   | 0.0008678   |
| rs9835139   | 3 | 31639335 A              | 11 | 47 T                   | 0.0001991   |
| rs11713598  | 3 | 31642037 A              | 11 | 43 T                   | 0.0008678   |
| rs4569693   | 3 | 31644397 G              | 11 | 43 T                   | 0.0008678   |
| rs7433833   | 3 | 31650288 C              | 11 | 43 T                   | 0.0008678   |
| rs4443213   | 3 | 31650500 A              | 11 | 43 T                   | 0.0008678   |
| rs7349468   | 3 | 31651335 G              | 11 | 43 A                   | 0.0008678   |
| rs9854442   | 3 | 31654038 A              | 11 | 43 G                   | 0.0008678   |
| rs13083410  | 3 | 31659754 T              | 11 | 43 C                   | 0.0008678   |
| rs12629516  | 3 | 31682527 T              | 11 | 43 C                   | 0.0008678   |
| rs9875317   | 3 | 31685398 T              | 11 | 44 C                   | 0.0007768   |

|             |   |                        |    |        |           |
|-------------|---|------------------------|----|--------|-----------|
| rs12172958  | 3 | 31691100 G             | 11 | 44 A   | 0.0007768 |
| rs12630628  | 3 | 31694718 C             | 11 | 44 G   | 0.0007768 |
| rs79723395  | 3 | 31954275 T             | 0  | 15 C   | 0.0005628 |
| rs76226662  | 3 | 36884315 T             | 10 | 1 C    | 0.0002681 |
| rs62245253  | 3 | 36898036 A             | 10 | 1 G    | 0.0002681 |
| rs62245258  | 3 | 36932602 A             | 10 | 1 G    | 0.0002681 |
| rs113568999 | 3 | 40943865 AT            | 7  | 0 A    | 0.0008679 |
| rs60041886  | 3 | 40944219 T             | 7  | 0 C    | 0.0008679 |
| 3:40946542  | 3 | 40946542 G             | 7  | 0 A    | 0.0008679 |
| rs143825656 | 3 | 40947151 T             | 7  | 0 C    | 0.0008679 |
| 3:40948039  | 3 | 40948039 T             | 7  | 0 C    | 0.0008679 |
| rs6793742   | 3 | 40949548 C             | 7  | 0 T    | 0.0008679 |
| rs6599126   | 3 | 40954063 G             | 7  | 0 A    | 0.0008679 |
| rs72859818  | 3 | 40957804 A             | 7  | 0 G    | 0.0008679 |
| rs11929001  | 3 | 40977639 G             | 7  | 0 A    | 0.0008679 |
| rs10865897  | 3 | 41017070 G             | 7  | 0 A    | 0.0008679 |
| rs342539    | 3 | 42510528 A             | 1  | 23 G   | 0.0001158 |
| rs140056071 | 3 | 45359850 C             | 10 | 1 G    | 0.0002681 |
| rs61007059  | 3 | 45361210 CG            | 10 | 1 C    | 0.0002681 |
| rs150045682 | 3 | 45361953 C             | 10 | 1 CTTT | 0.0002681 |
| rs2581792   | 3 | 53035044 C             | 26 | 17 T   | 0.0007398 |
| rs73077837  | 3 | 53042074 T             | 12 | 2 C    | 0.0001279 |
| 3:53138402  | 3 | 53138402 CT            | 10 | 1 C    | 0.0002681 |
| rs56125165  | 3 | 53317098 T             | 17 | 7 C    | 0.0004382 |
| rs17062350  | 3 | 60128846 T             | 6  | 32 C   | 0.00098   |
| rs35022605  | 3 | 60130882 A             | 6  | 33 AT  | 0.0009098 |
| rs62240253  | 3 | 60132040 T             | 6  | 33 C   | 0.0009098 |
| rs12632865  | 3 | 60132390 T             | 6  | 33 C   | 0.0009098 |
| rs11130756  | 3 | 60132658 A             | 6  | 32 G   | 0.00098   |
| rs4679639   | 3 | 60134540 C             | 6  | 32 A   | 0.00098   |
| rs11709255  | 3 | 60137556 T             | 6  | 32 A   | 0.00098   |
| 3:65023533  | 3 | 65023533 CTGTGTGTGTGTC | 9  | 0 C    | 0.0001034 |
| rs4688537   | 3 | 65044903 A             | 13 | 3 G    | 0.0002409 |
| rs17072462  | 3 | 65151691 C             | 19 | 9 G    | 0.0004395 |
| rs17072464  | 3 | 65151812 G             | 19 | 9 T    | 0.0004395 |
| rs9876289   | 3 | 66931371 G             | 9  | 1 A    | 0.0007194 |
| rs9857208   | 3 | 66964812 A             | 9  | 1 C    | 0.0007194 |
| rs13065059  | 3 | 67031250 A             | 9  | 1 G    | 0.0007194 |
| rs4855329   | 3 | 68353494 T             | 2  | 27 C   | 0.000073  |
| rs4345072   | 3 | 68353956 C             | 2  | 27 A   | 0.000073  |
| rs6549115   | 3 | 68355872 A             | 2  | 27 T   | 0.000073  |



|             |   |                        |    |              |            |
|-------------|---|------------------------|----|--------------|------------|
| rs9822608   | 3 | 68357852 T             | 2  | 27 G         | 0.000073   |
| rs57935782  | 3 | 68360456 T             | 2  | 27 TGTCATATA | 0.000073   |
| rs59158231  | 3 | 68360460 A             | 2  | 27 ACGTT     | 0.000073   |
| rs2131042   | 3 | 68361179 G             | 2  | 27 A         | 0.000073   |
| rs4378971   | 3 | 68363844 A             | 2  | 27 T         | 0.000073   |
| rs13097366  | 3 | 68367425 A             | 11 | 44 T         | 0.0007768  |
| rs10155009  | 3 | 68368649 G             | 4  | 31 A         | 0.0001398  |
| rs1491757   | 3 | 68369111 G             | 4  | 31 T         | 0.0001398  |
| rs1491756   | 3 | 68369288 G             | 4  | 31 A         | 0.0001398  |
| rs1491755   | 3 | 68369391 G             | 4  | 31 A         | 0.0001398  |
| rs1388506   | 3 | 68372549 G             | 9  | 44 A         | 0.0000882  |
| rs11274211  | 3 | 68373386 TGCCTTGTTGATA | 9  | 44 T         | 0.0000882  |
| rs6549116   | 3 | 68373756 T             | 4  | 29 C         | 0.0004463  |
| rs6770136   | 3 | 68374110 A             | 4  | 29 G         | 0.0004463  |
| rs34315106  | 3 | 68374822 C             | 9  | 44 T         | 0.0000882  |
| rs1491743   | 3 | 68374909 C             | 4  | 29 T         | 0.0004463  |
| rs1491745   | 3 | 68379169 A             | 9  | 42 G         | 0.0003081  |
| rs1491746   | 3 | 68379240 G             | 7  | 37 C         | 0.0003628  |
| rs2313283   | 3 | 68380055 C             | 7  | 37 A         | 0.0003628  |
| rs5849825   | 3 | 68380059 G             | 7  | 37 GT        | 0.0003628  |
| rs3033741   | 3 | 68380202 C             | 7  | 37 CTGA      | 0.0003628  |
| rs3033745   | 3 | 68380268 A             | 7  | 37 AAGTACT   | 0.0003628  |
| rs6763500   | 3 | 68381076 T             | 6  | 34 C         | 0.0004884  |
| rs6763516   | 3 | 68381106 T             | 6  | 34 C         | 0.0005004  |
| rs1552710   | 3 | 68386395 A             | 12 | 46 G         | 0.0005428  |
| rs1552711   | 3 | 68386397 G             | 12 | 46 C         | 0.0005428  |
| rs1388500   | 3 | 68388365 G             | 15 | 52 C         | 0.0006042  |
| rs262250    | 3 | 68403593 C             | 15 | 51 G         | 0.0006974  |
| rs262248    | 3 | 68405259 T             | 16 | 53 C         | 0.0006806  |
| rs171892    | 3 | 68430620 C             | 16 | 54 T         | 0.0003907  |
| rs17831048  | 3 | 68475353 C             | 29 | 22 T         | 0.0007063  |
| rs113071699 | 3 | 70386328 T             | 27 | 17 TTAA      | 0.000186   |
| rs12491962  | 3 | 70389633 C             | 26 | 18 A         | 0.0007809  |
| rs11715008  | 3 | 72674056 A             | 24 | 15 G         | 0.0005235  |
| rs516826    | 3 | 73862619 A             | 19 | 7 C          | 0.00008788 |
| rs35869217  | 3 | 73862785 AG            | 19 | 7 A          | 0.00008788 |
| rs291532    | 3 | 73864474 A             | 19 | 7 T          | 0.00008788 |
| rs291530    | 3 | 73866394 G             | 19 | 7 C          | 0.00008788 |
| rs17028298  | 3 | 73867865 T             | 5  | 31 C         | 0.0006549  |
| rs548611    | 3 | 73868089 T             | 19 | 7 C          | 0.00008788 |
| rs633118    | 3 | 73868891 G             | 19 | 7 A          | 0.00008788 |

|             |   |              |    |        |            |
|-------------|---|--------------|----|--------|------------|
| rs634465    | 3 | 73869231 T   | 19 | 7 C    | 0.00008788 |
| rs514711    | 3 | 73869503 T   | 18 | 6 C    | 0.0001281  |
| rs492878    | 3 | 73869545 T   | 19 | 7 C    | 0.00008788 |
| rs9848344   | 3 | 73869793 G   | 33 | 27 A   | 0.0005258  |
| rs291509    | 3 | 73870186 T   | 19 | 7 C    | 0.00008788 |
| rs291508    | 3 | 73870544 A   | 19 | 7 G    | 0.00008788 |
| rs2323170   | 3 | 73871068 G   | 33 | 27 C   | 0.0005258  |
| rs291507    | 3 | 73871691 G   | 18 | 7 C    | 0.0001975  |
| rs167097    | 3 | 73872340 C   | 19 | 7 G    | 0.00008788 |
| rs7649822   | 3 | 73872496 G   | 20 | 11 A   | 0.0008202  |
| rs291505    | 3 | 73873620 T   | 19 | 7 C    | 0.00008788 |
| rs167096    | 3 | 73874699 T   | 19 | 7 G    | 0.00008788 |
| rs291503    | 3 | 73874777 C   | 19 | 7 T    | 0.00008788 |
| rs1107768   | 3 | 73876725 T   | 19 | 7 C    | 0.00008788 |
| rs9784332   | 3 | 77106847 G   | 3  | 26 A   | 0.0005074  |
| rs13060873  | 3 | 79768662 A   | 30 | 23 G   | 0.0007082  |
| rs34322553  | 3 | 80115330 G   | 24 | 15 T   | 0.0005235  |
| rs34957999  | 3 | 80115332 T   | 24 | 15 G   | 0.0005235  |
| 3:81054639  | 3 | 81054639 T   | 14 | 2 TCTC | 0.00002365 |
| rs11712051  | 3 | 81289857 A   | 7  | 35 G   | 0.0007198  |
| rs10568741  | 3 | 84322697 CAT | 16 | 7 C    | 0.0009539  |
| rs79693379  | 3 | 87006367 G   | 7  | 0 A    | 0.0008679  |
| rs764684    | 3 | 100530856 C  | 11 | 44 T   | 0.0007768  |
| rs7612334   | 3 | 100532269 A  | 11 | 43 G   | 0.0008678  |
| rs9879088   | 3 | 100537896 A  | 9  | 40 G   | 0.000591   |
| rs7634500   | 3 | 100539676 C  | 9  | 40 G   | 0.000591   |
| 3:100562246 | 3 | 100562246 G  | 20 | 10 GT  | 0.0005977  |
| 3:100562247 | 3 | 100562247 G  | 20 | 10 T   | 0.0005977  |
| rs1445076   | 3 | 106191942 C  | 13 | 48 T   | 0.0005647  |
| 3:106522026 | 3 | 106522026 A  | 11 | 43 T   | 0.0008678  |
| rs11921731  | 3 | 115389796 A  | 24 | 15 G   | 0.0005235  |
| rs3732624   | 3 | 115394383 T  | 24 | 15 C   | 0.0005235  |
| rs9631453   | 3 | 115394563 C  | 24 | 12 G   | 0.0001247  |
| rs3772920   | 3 | 115397299 G  | 18 | 9 A    | 0.0009279  |
| rs12634436  | 3 | 115402685 T  | 18 | 9 A    | 0.0009279  |
| rs3772926   | 3 | 115405505 C  | 18 | 9 T    | 0.0009279  |
| rs111879237 | 3 | 115406999 A  | 18 | 9 G    | 0.0009279  |
| rs6777348   | 3 | 117137202 T  | 18 | 9 C    | 0.0009279  |
| rs4632551   | 3 | 117148573 C  | 18 | 9 G    | 0.0009279  |
| 3:124386900 | 3 | 124386900 A  | 0  | 19 C   | 0.00006755 |
| 3:128495792 | 3 | 128495792 G  | 36 | 31 C   | 0.0001448  |

|             |   |                 |    |           |           |
|-------------|---|-----------------|----|-----------|-----------|
| rs201011313 | 3 | 130973927 G     | 30 | 24 A      | 0.0007114 |
| rs201645765 | 3 | 130973931 G     | 25 | 14 A      | 0.0002032 |
| 3:130973932 | 3 | 130973932 A     | 16 | 7 G       | 0.0009539 |
| rs275688    | 3 | 148347114 T     | 7  | 0 A       | 0.0008679 |
| rs275687    | 3 | 148347582 C     | 7  | 0 A       | 0.0008679 |
| rs275686    | 3 | 148347714 C     | 7  | 0 G       | 0.0008679 |
| rs275684    | 3 | 148347952 T     | 7  | 0 C       | 0.0008679 |
| rs275683    | 3 | 148347959 G     | 7  | 0 A       | 0.0008679 |
| rs649342    | 3 | 148350663 T     | 7  | 0 A       | 0.0008679 |
| rs444752    | 3 | 148351096 A     | 7  | 0 C       | 0.0008679 |
| rs413671    | 3 | 148351517 T     | 7  | 0 A       | 0.0008679 |
| rs387951    | 3 | 148351790 A     | 7  | 0 G       | 0.0008679 |
| rs375839    | 3 | 148351839 G     | 7  | 0 A       | 0.0008679 |
| rs201943    | 3 | 148352362 C     | 7  | 0 T       | 0.0008679 |
| rs275695    | 3 | 148352651 T     | 7  | 0 A       | 0.0008679 |
| rs4058143   | 3 | 148352896 CAATT | 7  | 0 C       | 0.0008679 |
| rs275696    | 3 | 148353206 G     | 7  | 0 A       | 0.0008679 |
| rs275697    | 3 | 148353740 C     | 7  | 0 T       | 0.0008679 |
| rs275698    | 3 | 148353866 T     | 7  | 0 C       | 0.0008679 |
| rs200840889 | 3 | 148543836 T     | 22 | 13 TA     | 0.0006749 |
| rs200542983 | 3 | 148543842 T     | 22 | 13 TGAATG | 0.0006749 |
| rs189278664 | 3 | 150440484 A     | 8  | 0 T       | 0.0003372 |
| rs201510360 | 3 | 151265219 T     | 18 | 8 C       | 0.0005897 |
| rs62275102  | 3 | 152825408 C     | 12 | 2 T       | 0.0001711 |
| rs11323788  | 3 | 152826132 G     | 12 | 2 GA      | 0.0001711 |
| rs17468698  | 3 | 152831259 A     | 12 | 2 G       | 0.0001711 |
| rs111530192 | 3 | 152831858 A     | 12 | 2 G       | 0.0001711 |
| rs56195773  | 3 | 152833232 T     | 12 | 2 C       | 0.0001711 |
| rs56107526  | 3 | 152833810 A     | 12 | 2 G       | 0.0001711 |
| rs894802    | 3 | 152878719 C     | 13 | 4 A       | 0.000883  |
| rs894801    | 3 | 152878838 A     | 13 | 4 C       | 0.000883  |
| rs61252895  | 3 | 152882810 G     | 13 | 4 A       | 0.000883  |
| rs6809490   | 3 | 152885818 A     | 13 | 4 G       | 0.000883  |
| rs59172775  | 3 | 152902599 T     | 13 | 4 C       | 0.000883  |
| rs73163278  | 3 | 152906063 A     | 13 | 4 G       | 0.000883  |
| rs55748959  | 3 | 152912196 G     | 13 | 4 A       | 0.000883  |
| rs822719    | 3 | 165070685 T     | 10 | 42 C      | 0.0006808 |
| rs7648573   | 3 | 165080780 G     | 10 | 42 A      | 0.0006808 |
| rs9839242   | 3 | 165116509 T     | 9  | 40 C      | 0.000591  |
| rs137947271 | 3 | 165117360 C     | 0  | 20 CT     | 0.0000355 |
| rs1404782   | 3 | 165118985 A     | 9  | 40 G      | 0.000591  |

|             |   |              |    |      |            |
|-------------|---|--------------|----|------|------------|
| rs6444805   | 3 | 165121123 A  | 9  | 40 G | 0.000591   |
| rs9878522   | 3 | 165125159 C  | 2  | 22 T | 0.0009583  |
| rs9859645   | 3 | 165125655 A  | 2  | 22 G | 0.0009583  |
| rs6776072   | 3 | 165126317 C  | 0  | 20 T | 0.0000355  |
| rs9864667   | 3 | 165126682 T  | 2  | 22 C | 0.0009583  |
| rs9869260   | 3 | 165127088 A  | 2  | 22 G | 0.0009583  |
| rs4858780   | 3 | 165127614 A  | 0  | 20 T | 0.0000355  |
| rs9874980   | 3 | 165128475 G  | 2  | 22 C | 0.0009583  |
| rs9879604   | 3 | 165129027 A  | 0  | 20 C | 0.0000355  |
| rs10936444  | 3 | 165129566 A  | 2  | 22 T | 0.0009583  |
| rs11923404  | 3 | 165131390 G  | 0  | 19 A | 0.00006755 |
| rs2312406   | 3 | 165132797 T  | 0  | 17 C | 0.0002606  |
| rs6764581   | 3 | 165133245 A  | 0  | 17 G | 0.0002606  |
| rs60566962  | 3 | 165134328 T  | 0  | 17 C | 0.0002606  |
| rs58212043  | 3 | 165135759 CA | 0  | 17 C | 0.0002606  |
| rs111463002 | 3 | 165138293 C  | 0  | 17 T | 0.0002606  |
| rs9862194   | 3 | 165138422 G  | 0  | 17 A | 0.0002606  |
| rs7626548   | 3 | 165138597 G  | 0  | 17 A | 0.0002606  |
| rs1010211   | 3 | 171131640 T  | 13 | 4 C  | 0.000883   |
| 3:177943093 | 3 | 177943093 A  | 2  | 22 C | 0.0009583  |
| 3:178546724 | 3 | 178546724 A  | 16 | 6 T  | 0.0002677  |
| rs9290671   | 3 | 178568129 C  | 33 | 29 T | 0.0009301  |
| rs2119898   | 3 | 179439466 T  | 37 | 34 C | 0.0006983  |
| rs2165679   | 3 | 179439567 A  | 37 | 34 G | 0.0006983  |
| rs35593662  | 3 | 179440107 G  | 37 | 34 C | 0.0006983  |
| rs1966757   | 3 | 179442279 T  | 37 | 34 G | 0.0006983  |
| rs2139561   | 3 | 183653254 T  | 27 | 19 C | 0.0008555  |
| rs2139559   | 3 | 183653937 T  | 27 | 19 G | 0.0008555  |
| rs3749441   | 3 | 183660806 G  | 27 | 19 C | 0.0008555  |
| rs1464322   | 3 | 183666862 A  | 26 | 18 G | 0.0007809  |
| rs4148586   | 3 | 183669396 T  | 27 | 19 C | 0.0008555  |
| rs56343575  | 3 | 183670633 T  | 27 | 19 C | 0.0008555  |
| rs3817404   | 3 | 183670672 A  | 27 | 19 C | 0.0008555  |
| rs4912517   | 3 | 183671340 T  | 27 | 19 G | 0.0008555  |
| rs68153167  | 3 | 183672846 T  | 27 | 19 C | 0.0008555  |
| rs6443925   | 3 | 183679754 C  | 27 | 18 G | 0.0004001  |
| rs2271936   | 3 | 183682695 C  | 27 | 19 T | 0.0008555  |
| rs4148581   | 3 | 183685165 C  | 27 | 19 T | 0.0008555  |
| rs7637515   | 3 | 183694215 A  | 27 | 19 T | 0.0008555  |
| rs3792582   | 3 | 183694602 G  | 27 | 19 A | 0.0008555  |
| rs66605623  | 3 | 183697628 A  | 27 | 19 G | 0.0008555  |

|             |   |             |    |      |            |
|-------------|---|-------------|----|------|------------|
| rs4912471   | 3 | 183698341 T | 27 | 19 C | 0.0008555  |
| rs12185910  | 3 | 183698626 A | 27 | 19 G | 0.0008555  |
| rs2872247   | 3 | 183699781 C | 27 | 19 A | 0.0008555  |
| rs55714546  | 3 | 183711150 C | 27 | 19 T | 0.0008555  |
| rs66850130  | 3 | 183711628 T | 27 | 19 C | 0.0008555  |
| rs55905394  | 3 | 183722364 A | 27 | 19 T | 0.0008555  |
| rs55982636  | 3 | 183722417 C | 27 | 19 T | 0.0008555  |
| rs112396093 | 3 | 183724974 C | 27 | 19 A | 0.0008555  |
| rs55846170  | 3 | 183737498 G | 27 | 19 A | 0.0008555  |
| rs55913043  | 3 | 183737667 T | 27 | 19 C | 0.0008555  |
| rs56148005  | 3 | 183738579 A | 27 | 19 G | 0.0008555  |
| rs66765300  | 3 | 183743778 A | 27 | 19 G | 0.0008555  |
| rs939334    | 3 | 183749731 C | 27 | 18 T | 0.0004001  |
| rs2014046   | 3 | 183749937 A | 27 | 18 G | 0.0004001  |
| rs2090720   | 3 | 183750005 C | 27 | 18 T | 0.0004001  |
| rs55953689  | 3 | 183756897 G | 27 | 17 A | 0.000186   |
| rs9647371   | 3 | 184284279 T | 13 | 4 C  | 0.000883   |
| rs7644377   | 3 | 184295316 T | 16 | 5 C  | 0.0001588  |
| rs6786200   | 3 | 184311889 G | 9  | 1 T  | 0.0007194  |
| rs17799372  | 3 | 187592723 G | 7  | 0 C  | 0.0008679  |
| rs377395085 | 3 | 187609123 A | 7  | 0 C  | 0.0008679  |
| 3:187609127 | 3 | 187609127 G | 7  | 0 C  | 0.0008679  |
| rs9880944   | 3 | 197647970 A | 0  | 15 C | 0.0005628  |
| rs113481869 | 3 | 197647973 T | 0  | 15 C | 0.0005628  |
| rs111656082 | 3 | 197647976 G | 0  | 15 A | 0.0005628  |
| rs2164049   | 4 | 4175554 T   | 33 | 26 C | 0.0002784  |
| rs12501349  | 4 | 4175868 C   | 9  | 1 T  | 0.0007194  |
| rs12498912  | 4 | 4175887 T   | 9  | 1 C  | 0.0007194  |
| rs4689202   | 4 | 4175894 G   | 25 | 11 A | 0.00001926 |
| rs34485304  | 4 | 4175938 A   | 9  | 39 G | 0.000596   |
| rs12501414  | 4 | 4176067 C   | 9  | 1 T  | 0.0007194  |
| rs2083724   | 4 | 4190942 G   | 16 | 6 A  | 0.0005436  |
| rs3097979   | 4 | 4201105 C   | 31 | 23 A | 0.0003729  |
| rs3097980   | 4 | 4201116 G   | 31 | 23 T | 0.0003729  |
| rs2980129   | 4 | 4201297 G   | 30 | 23 A | 0.0007082  |
| rs2916416   | 4 | 4201342 G   | 30 | 23 A | 0.0007082  |
| rs2980131   | 4 | 4202350 A   | 31 | 24 C | 0.0004543  |
| rs2916417   | 4 | 4202389 A   | 29 | 23 T | 0.0006489  |
| rs2916422   | 4 | 4206953 A   | 12 | 47 G | 0.0004795  |
| rs7666381   | 4 | 4210460 C   | 12 | 46 G | 0.0005428  |
| rs11725336  | 4 | 4218669 T   | 15 | 54 C | 0.0001803  |

|            |   |               |    |         |           |
|------------|---|---------------|----|---------|-----------|
| rs28633695 | 4 | 4220375 C     | 36 | 29 G    | 0.0001509 |
| rs4689930  | 4 | 4756636 T     | 13 | 4 C     | 0.000883  |
| rs739778   | 4 | 7703265 A     | 31 | 24 G    | 0.0004543 |
| rs2865050  | 4 | 9546117 G     | 0  | 15 C    | 0.0005628 |
| rs9715737  | 4 | 9546122 A     | 0  | 15 G    | 0.0005628 |
| rs6843276  | 4 | 9714147 C     | 12 | 45 T    | 0.0009266 |
| 4:12151990 | 4 | 12151990 G    | 20 | 10 GT   | 0.0005561 |
| 4:12151991 | 4 | 12151991 G    | 20 | 10 T    | 0.0005346 |
| rs12640981 | 4 | 14764548 T    | 14 | 5 C     | 0.0008508 |
| rs35371493 | 4 | 14769427 A    | 14 | 5 G     | 0.0008508 |
| rs55770230 | 4 | 14770760 C    | 14 | 5 A     | 0.0008508 |
| rs56365123 | 4 | 14771921 T    | 14 | 5 C     | 0.0008508 |
| rs35340808 | 4 | 14784441 C    | 14 | 5 T     | 0.0008508 |
| rs59167658 | 4 | 14798590 G    | 14 | 5 A     | 0.0008508 |
| rs4554067  | 4 | 14798707 T    | 16 | 7 C     | 0.0009539 |
| 4:19690823 | 4 | 19690823 A    | 8  | 38 T    | 0.0004405 |
| rs58918138 | 4 | 20353473 T    | 1  | 20 G    | 0.0004403 |
| rs77041696 | 4 | 20358927 G    | 1  | 20 C    | 0.0004403 |
| rs4552454  | 4 | 20386044 A    | 1  | 20 C    | 0.0004403 |
| rs10027333 | 4 | 20390198 G    | 1  | 20 A    | 0.0004403 |
| rs7435615  | 4 | 20399168 A    | 1  | 20 G    | 0.0004403 |
| rs57411082 | 4 | 20408564 C    | 1  | 20 CTG  | 0.0004403 |
| rs10026931 | 4 | 20430582 G    | 1  | 19 C    | 0.0008417 |
| rs11728803 | 4 | 20851589 T    | 1  | 19 C    | 0.0008417 |
| rs71940315 | 4 | 20865321 C    | 1  | 19 CTT  | 0.0008417 |
| rs759245   | 4 | 25058232 G    | 15 | 51 A    | 0.0006974 |
| rs759244   | 4 | 25058323 A    | 15 | 51 T    | 0.0006974 |
| rs6821216  | 4 | 25058776 G    | 15 | 51 C    | 0.0006974 |
| rs6835786  | 4 | 25061194 A    | 15 | 51 C    | 0.0006974 |
| rs17408391 | 4 | 25101584 C    | 4  | 29 G    | 0.0004463 |
| rs80196582 | 4 | 25889810 C    | 7  | 0 A     | 0.0008679 |
| rs17499919 | 4 | 38461337 C    | 11 | 47 T    | 0.0001343 |
| 4:40024963 | 4 | 40024963 CGAG | 26 | 17 C    | 0.0003136 |
| 4:40024966 | 4 | 40024966 G    | 24 | 15 GGCA | 0.0003499 |
| 4:47142112 | 4 | 47142112 A    | 13 | 50 C    | 0.0002818 |
| 4:49209131 | 4 | 49209131 C    | 17 | 7 T     | 0.0004382 |
| rs7441960  | 4 | 57542238 A    | 31 | 25 G    | 0.0008555 |
| rs11721544 | 4 | 57542299 T    | 30 | 23 C    | 0.0007082 |
| rs12642850 | 4 | 57543677 G    | 30 | 23 A    | 0.0007082 |
| rs11945101 | 4 | 57544353 C    | 30 | 23 T    | 0.0007082 |
| rs72636326 | 4 | 58791168 G    | 8  | 0 A     | 0.0003016 |

|             |   |             |    |      |            |
|-------------|---|-------------|----|------|------------|
| rs72636328  | 4 | 58795455 T  | 8  | 0 C  | 0.0003016  |
| 4:58987446  | 4 | 58987446 G  | 8  | 0 T  | 0.0003776  |
| rs145721254 | 4 | 60398515 T  | 12 | 50 A | 0.00007817 |
| rs2054799   | 4 | 60437170 T  | 7  | 0 G  | 0.0008679  |
| rs79602894  | 4 | 61920822 G  | 1  | 19 T | 0.0008417  |
| rs76948623  | 4 | 61921038 T  | 1  | 19 G | 0.0008417  |
| rs74899240  | 4 | 61922855 G  | 1  | 19 C | 0.0008417  |
| rs79108432  | 4 | 61923606 G  | 1  | 18 T | 0.0008528  |
| rs2341739   | 4 | 61927052 T  | 1  | 19 A | 0.0008417  |
| 4:66069285  | 4 | 66069285 AC | 14 | 3 A  | 0.00009441 |
| rs11933083  | 4 | 68114997 G  | 14 | 4 A  | 0.0003939  |
| rs6534012   | 4 | 75547732 A  | 30 | 23 C | 0.0007082  |
| rs13124944  | 4 | 75547845 A  | 26 | 16 C | 0.0002858  |
| rs72653702  | 4 | 76999523 A  | 3  | 25 G | 0.0009258  |
| 4:82703972  | 4 | 82703972 G  | 8  | 0 C  | 0.0003016  |
| rs10016545  | 4 | 84578892 G  | 30 | 23 A | 0.0007082  |
| rs6821732   | 4 | 84580093 T  | 30 | 23 C | 0.0007082  |
| rs7694734   | 4 | 84580763 C  | 30 | 23 A | 0.0007082  |
| rs7671912   | 4 | 84581271 T  | 30 | 23 C | 0.0007082  |
| rs2868797   | 4 | 84582260 G  | 30 | 23 A | 0.0007082  |
| rs6822897   | 4 | 84582536 C  | 30 | 23 T | 0.0007082  |
| rs1563696   | 4 | 84583876 T  | 31 | 23 C | 0.0003729  |
| rs57980547  | 4 | 84600736 G  | 24 | 15 T | 0.0005235  |
| rs6535496   | 4 | 84601526 G  | 32 | 25 A | 0.0004454  |
| rs72659283  | 4 | 84907590 T  | 11 | 2 C  | 0.0004434  |
| rs2135284   | 4 | 84908159 G  | 11 | 2 A  | 0.0004434  |
| rs72659284  | 4 | 84910400 G  | 11 | 2 A  | 0.0004434  |
| rs72659286  | 4 | 84916214 G  | 11 | 2 T  | 0.0004434  |
| rs72659295  | 4 | 84934184 A  | 11 | 2 G  | 0.0004434  |
| rs74476563  | 4 | 84935594 GT | 11 | 2 G  | 0.0004434  |
| rs72659296  | 4 | 84936325 T  | 11 | 2 G  | 0.0004434  |
| rs72659297  | 4 | 84938960 C  | 11 | 2 G  | 0.0004434  |
| rs4129091   | 4 | 84941953 A  | 11 | 2 G  | 0.0004434  |
| rs113134562 | 4 | 84951643 T  | 11 | 2 C  | 0.0004434  |
| rs17007881  | 4 | 84953207 G  | 13 | 2 A  | 0.00006438 |
| rs1921883   | 4 | 84953383 C  | 13 | 2 T  | 0.00006438 |
| rs72660815  | 4 | 84954205 G  | 13 | 2 T  | 0.00006438 |
| rs72660816  | 4 | 84954602 C  | 13 | 2 A  | 0.00006438 |
| rs72660817  | 4 | 84955535 G  | 13 | 2 A  | 0.00006438 |
| rs72660819  | 4 | 84956002 C  | 13 | 2 A  | 0.00006438 |
| rs1317020   | 4 | 84956277 T  | 13 | 2 C  | 0.00006438 |

|             |   |              |    |                       |            |
|-------------|---|--------------|----|-----------------------|------------|
| rs56004187  | 4 | 84956736 C   | 13 | 2 T                   | 0.00006438 |
| rs1921880   | 4 | 84957198 T   | 13 | 2 G                   | 0.00006438 |
| rs1317519   | 4 | 84957652 T   | 13 | 2 C                   | 0.00006438 |
| rs72660826  | 4 | 84965875 G   | 13 | 3 A                   | 0.0002409  |
| rs74671679  | 4 | 84967393 G   | 13 | 4 GA                  | 0.000883   |
| rs56364031  | 4 | 84968393 T   | 13 | 4 A                   | 0.000883   |
| rs72660828  | 4 | 84969826 T   | 13 | 4 C                   | 0.000883   |
| rs72660829  | 4 | 84970036 G   | 13 | 4 A                   | 0.000883   |
| rs72660830  | 4 | 84972404 A   | 13 | 4 G                   | 0.000883   |
| rs72660831  | 4 | 84972436 T   | 13 | 4 C                   | 0.000883   |
| rs11097378  | 4 | 94548777 T   | 12 | 45 G                  | 0.0009266  |
| rs3864152   | 4 | 94553780 A   | 12 | 46 G                  | 0.0005428  |
| rs11932367  | 4 | 94557555 A   | 12 | 46 G                  | 0.0005428  |
| rs56210124  | 4 | 96672725 G   | 16 | 5 C                   | 0.0001588  |
| rs146016883 | 4 | 96673449 A   | 16 | 5 G                   | 0.0001588  |
| rs2043658   | 4 | 96677620 C   | 16 | 5 G                   | 0.0001588  |
| rs144043778 | 4 | 96721581 CT  | 16 | 5 C                   | 0.0001588  |
| rs1160489   | 4 | 99773191 T   | 10 | 1 G                   | 0.0002681  |
| rs7665186   | 4 | 99775406 G   | 9  | 1 A                   | 0.0007194  |
| rs961757    | 4 | 99779875 C   | 9  | 1 G                   | 0.0007194  |
| rs6532769   | 4 | 99780391 C   | 9  | 1 T                   | 0.0007194  |
| rs7677046   | 4 | 99781025 T   | 9  | 1 C                   | 0.0007194  |
| 4:105051472 | 4 | 105051472 C  | 0  | 19 T                  | 0.0001516  |
| 4:109041155 | 4 | 109041155 T  | 6  | 35 G                  | 0.0002764  |
| rs35828847  | 4 | 111211729 CT | 24 | 16 C                  | 0.0009443  |
| rs12510061  | 4 | 111214726 G  | 30 | 22 A                  | 0.0003565  |
| rs7682430   | 4 | 111219351 G  | 30 | 22 T                  | 0.0003565  |
| rs11279781  | 4 | 111235243 G  | 22 | 13 GTTATTATA          | 0.0006749  |
| rs62336634  | 4 | 111236872 A  | 22 | 13 G                  | 0.0006749  |
| rs11098151  | 4 | 113255531 A  | 27 | 20 G                  | 0.0008358  |
| rs11936170  | 4 | 119464069 G  | 22 | 13 A                  | 0.0006749  |
| rs111866828 | 4 | 120124537 A  | 13 | 4 G                   | 0.000883   |
| rs34350503  | 4 | 123827911 A  | 22 | 13 G                  | 0.0006749  |
| rs12513181  | 4 | 123835656 C  | 22 | 13 A                  | 0.0006749  |
| rs12648093  | 4 | 123838758 A  | 22 | 13 G                  | 0.0006749  |
| rs62325775  | 4 | 123947268 A  | 20 | 10 G                  | 0.0005561  |
| rs1506161   | 4 | 126766315 T  | 31 | 25 C                  | 0.0008555  |
| rs13119203  | 4 | 130194362 A  | 33 | 27 G                  | 0.0005258  |
| 4:139684634 | 4 | 139684634 T  | 7  | 0 TAGATAGATAGATAGATAG | 0.0008679  |
| rs13108250  | 4 | 145234989 T  | 3  | 27 G                  | 0.0002808  |
| rs2719341   | 4 | 145263286 T  | 7  | 36 G                  | 0.0006639  |



|             |   |                   |    |                     |            |
|-------------|---|-------------------|----|---------------------|------------|
| rs2719335   | 4 | 145289459 C       | 7  | 36 T                | 0.0006639  |
| rs2657795   | 4 | 145350264 A       | 6  | 36 C                | 0.0001537  |
| rs112587461 | 4 | 145379968 T       | 4  | 27 G                | 0.000811   |
| 4:153056425 | 4 | 153056425 A       | 0  | 16 G                | 0.0002757  |
| rs10002011  | 4 | 154094675 A       | 17 | 56 G                | 0.0003692  |
| rs10001881  | 4 | 154094682 T       | 17 | 56 C                | 0.0003692  |
| rs142792673 | 4 | 154096164 GTTTTGT | 35 | 33 G                | 0.0004561  |
| rs3804100   | 4 | 154625409 C       | 9  | 1 T                 | 0.0007194  |
| rs111905892 | 4 | 154628613 A       | 9  | 1 G                 | 0.0007194  |
| rs2606322   | 4 | 154643222 G       | 7  | 0 T                 | 0.0008679  |
| rs1869947   | 4 | 154643503 G       | 7  | 0 A                 | 0.0008679  |
| rs4145338   | 4 | 154654323 C       | 7  | 0 T                 | 0.0008679  |
| rs10434139  | 4 | 154654665 A       | 7  | 0 G                 | 0.0008679  |
| rs56256921  | 4 | 154655929 A       | 7  | 0 G                 | 0.0008679  |
| rs11931479  | 4 | 154664523 G       | 7  | 0 A                 | 0.0008679  |
| rs17030417  | 4 | 154670813 G       | 7  | 0 A                 | 0.0008679  |
| rs11946635  | 4 | 154674080 A       | 7  | 0 G                 | 0.0008679  |
| rs11946638  | 4 | 154674095 T       | 7  | 0 G                 | 0.0008679  |
| rs57666128  | 4 | 154674842 A       | 7  | 0 T                 | 0.0008679  |
| 4:155246471 | 4 | 155246471 A       | 0  | 18 G                | 0.0001312  |
| 4:155246473 | 4 | 155246473 A       | 0  | 21 G                | 0.00003544 |
| 4:161072770 | 4 | 161072770 G       | 4  | 28 A                | 0.0008078  |
| rs374300171 | 4 | 161074637 C       | 2  | 22 T                | 0.0009583  |
| 4:163515735 | 4 | 163515735 A       | 1  | 20 AAATAAATAAATAAAT | 0.0004403  |
| rs9995462   | 4 | 163515736 T       | 2  | 23 A                | 0.0005167  |
| rs200385614 | 4 | 164804411 A       | 7  | 35 G                | 0.0007198  |
| rs200908737 | 4 | 164804412 T       | 7  | 35 A                | 0.0007198  |
| 4:164896322 | 4 | 164896322 T       | 35 | 30 G                | 0.0006538  |
| rs1246927   | 4 | 166543852 C       | 28 | 17 T                | 0.0000884  |
| rs78218057  | 4 | 172125931 A       | 7  | 0 G                 | 0.0008679  |
| rs901236    | 4 | 172740734 T       | 12 | 47 G                | 0.0004795  |
| rs4396959   | 4 | 172743234 G       | 19 | 58 A                | 0.0006983  |
| rs2716789   | 4 | 180503663 T       | 31 | 24 C                | 0.0004543  |
| rs7696678   | 4 | 189015024 T       | 10 | 42 C                | 0.0006808  |
| rs72725404  | 4 | 189965620 A       | 0  | 17 G                | 0.0002606  |
| rs62340474  | 4 | 189975229 T       | 1  | 21 C                | 0.0002339  |
| rs34465723  | 4 | 190008501 A       | 33 | 26 G                | 0.0002784  |
| rs2101911   | 4 | 190009975 T       | 33 | 26 C                | 0.0002784  |
| rs62340525  | 4 | 190010558 T       | 32 | 26 C                | 0.0008799  |
| rs6848118   | 4 | 190014350 C       | 32 | 26 T                | 0.0008799  |
| rs6848314   | 4 | 190014460 C       | 32 | 26 T                | 0.0008799  |

|             |   |              |    |                       |            |
|-------------|---|--------------|----|-----------------------|------------|
| rs34069301  | 4 | 190015739 AG | 32 | 26 A                  | 0.0008799  |
| rs36108077  | 4 | 190017202 T  | 31 | 25 C                  | 0.0008555  |
| rs6829594   | 4 | 190029232 T  | 0  | 15 C                  | 0.0005628  |
| rs116695447 | 4 | 190128855 C  | 9  | 1 G                   | 0.0007194  |
| rs35269155  | 5 | 2077306 G    | 14 | 52 GC                 | 0.0001845  |
| rs11741532  | 5 | 2077318 G    | 14 | 52 A                  | 0.0001845  |
| rs35028140  | 5 | 2077343 G    | 13 | 50 GAA                | 0.0002818  |
| rs11133927  | 5 | 2077356 T    | 13 | 50 G                  | 0.0002818  |
| rs10866530  | 5 | 2077580 T    | 13 | 50 C                  | 0.0002818  |
| rs10866531  | 5 | 2077739 T    | 13 | 50 G                  | 0.0002818  |
| rs4246755   | 5 | 2078006 T    | 15 | 53 G                  | 0.0003298  |
| rs10062706  | 5 | 2091502 C    | 13 | 48 G                  | 0.0005647  |
| rs6891887   | 5 | 2092044 G    | 13 | 48 T                  | 0.0005647  |
| rs6893206   | 5 | 2092045 C    | 13 | 48 T                  | 0.0005647  |
| rs460672    | 5 | 2355032 G    | 16 | 4 C                   | 0.00007821 |
| rs462906    | 5 | 2355389 T    | 15 | 4 C                   | 0.000175   |
| rs458006    | 5 | 2355587 A    | 14 | 4 C                   | 0.0003939  |
| rs113602711 | 5 | 2355658 T    | 15 | 4 TATGCTAATGTCAGAAAGA | 0.000175   |
| rs58937979  | 5 | 2355682 T    | 15 | 4 C                   | 0.000175   |
| rs2641215   | 5 | 2355878 T    | 15 | 4 G                   | 0.000175   |
| rs456732    | 5 | 2358645 G    | 15 | 4 A                   | 0.000175   |
| rs465527    | 5 | 2359450 A    | 13 | 3 G                   | 0.0002409  |
| rs2628160   | 5 | 2361180 T    | 13 | 3 G                   | 0.0002409  |
| 5:2781841   | 5 | 2781841 T    | 6  | 36 TTC                | 0.0001537  |
| rs200556114 | 5 | 2781844 A    | 6  | 36 ATCCAG             | 0.0001537  |
| rs34866103  | 5 | 2782407 GA   | 6  | 36 G                  | 0.0001537  |
| rs11952868  | 5 | 2783714 C    | 6  | 36 T                  | 0.0001537  |
| rs11743697  | 5 | 2784489 A    | 6  | 36 T                  | 0.0001537  |
| rs1118651   | 5 | 2786321 T    | 6  | 37 A                  | 0.00008623 |
| rs78185201  | 5 | 2786669 T    | 9  | 1 C                   | 0.0007194  |
| rs34196947  | 5 | 2786964 T    | 6  | 37 C                  | 0.00008623 |
| rs34195323  | 5 | 2787379 C    | 6  | 37 CT                 | 0.00008623 |
| rs35813681  | 5 | 2787631 A    | 6  | 36 T                  | 0.0001537  |
| rs11133961  | 5 | 2788119 T    | 6  | 36 G                  | 0.0001537  |
| rs1106547   | 5 | 2788832 A    | 6  | 36 G                  | 0.0001537  |
| rs7702905   | 5 | 2788906 A    | 6  | 36 G                  | 0.0001537  |
| rs35681818  | 5 | 2791777 T    | 6  | 36 C                  | 0.0001537  |
| rs10069464  | 5 | 2792395 G    | 6  | 36 T                  | 0.0001537  |
| rs7729432   | 5 | 2793841 T    | 6  | 36 G                  | 0.0001537  |
| rs13180135  | 5 | 2798572 A    | 5  | 37 G                  | 0.00005136 |
| rs12374492  | 5 | 2798741 T    | 6  | 36 C                  | 0.0001537  |

|             |   |              |    |                   |           |
|-------------|---|--------------|----|-------------------|-----------|
| rs148802928 | 5 | 2800384 C    | 9  | 1 CCT             | 0.0007194 |
| rs3822432   | 5 | 6609112 G    | 40 | 37 A              | 0.0003306 |
| rs3756429   | 5 | 6613146 A    | 34 | 29 G              | 0.0006139 |
| rs3776436   | 5 | 6614963 G    | 34 | 29 A              | 0.0006139 |
| rs3776435   | 5 | 6614969 A    | 34 | 29 G              | 0.0006139 |
| rs2288443   | 5 | 6619733 C    | 32 | 26 T              | 0.0008799 |
| rs2288446   | 5 | 6620459 A    | 32 | 26 G              | 0.0008799 |
| 5:8922720   | 5 | 8922720 T    | 12 | 47 C              | 0.0004795 |
| rs10547411  | 5 | 9384785 G    | 9  | 1 GAT             | 0.000839  |
| rs4425512   | 5 | 18954896 A   | 27 | 17 G              | 0.000186  |
| rs4447989   | 5 | 18959731 A   | 27 | 17 T              | 0.000186  |
| rs10040022  | 5 | 18964842 G   | 27 | 17 A              | 0.000186  |
| rs75322590  | 5 | 18970904 T   | 27 | 17 TG             | 0.000186  |
| rs35800895  | 5 | 18970905 T   | 27 | 17 TATGTA         | 0.000186  |
| 5:18970906  | 5 | 18970906 C   | 27 | 17 CAACAAATGTACAA | 0.000186  |
| rs4597970   | 5 | 18971937 C   | 27 | 17 T              | 0.000186  |
| rs10056516  | 5 | 18973089 C   | 27 | 18 A              | 0.0004001 |
| rs10071196  | 5 | 18973115 G   | 27 | 18 A              | 0.0004001 |
| rs142645628 | 5 | 18973588 T   | 28 | 17 TA             | 0.0000884 |
| rs13155140  | 5 | 18973594 T   | 28 | 17 A              | 0.0000884 |
| rs111273782 | 5 | 18974181 A   | 9  | 1 T               | 0.0007194 |
| 5:18974183  | 5 | 18974183 A   | 27 | 17 T              | 0.000186  |
| 5:18974185  | 5 | 18974185 A   | 27 | 18 T              | 0.0004001 |
| 5:18974187  | 5 | 18974187 A   | 27 | 18 T              | 0.0004001 |
| rs4866133   | 5 | 18974981 T   | 27 | 17 G              | 0.000186  |
| rs77430313  | 5 | 18976454 G   | 28 | 19 A              | 0.0002695 |
| rs70950014  | 5 | 18976473 T   | 26 | 17 TAC            | 0.0002863 |
| rs141348783 | 5 | 18976539 CAT | 27 | 18 C              | 0.0004001 |
| rs12109900  | 5 | 18976856 T   | 27 | 17 C              | 0.000186  |
| rs12109901  | 5 | 18976857 T   | 27 | 17 C              | 0.000186  |
| rs10037119  | 5 | 18985701 G   | 27 | 17 C              | 0.000186  |
| rs11747928  | 5 | 18986545 C   | 27 | 17 T              | 0.000186  |
| rs10036758  | 5 | 18987784 T   | 27 | 17 A              | 0.000186  |
| rs35854198  | 5 | 18988665 GC  | 27 | 17 G              | 0.000186  |
| rs13159552  | 5 | 18989020 C   | 27 | 17 T              | 0.000186  |
| rs35204104  | 5 | 18989038 A   | 27 | 17 AT             | 0.000186  |
| rs34575433  | 5 | 18989059 AGC | 27 | 17 A              | 0.000186  |
| rs7713168   | 5 | 18990117 C   | 27 | 17 A              | 0.000186  |
| rs10940990  | 5 | 18990844 A   | 27 | 17 G              | 0.000186  |
| rs4263496   | 5 | 18994108 G   | 27 | 17 T              | 0.000186  |
| rs4510591   | 5 | 18994392 A   | 27 | 17 G              | 0.000186  |

|             |   |             |    |       |           |
|-------------|---|-------------|----|-------|-----------|
| rs7730213   | 5 | 18994462 C  | 27 | 17 T  | 0.000186  |
| rs10064363  | 5 | 18997081 C  | 27 | 17 T  | 0.000186  |
| rs33915140  | 5 | 18997166 G  | 27 | 18 GA | 0.0004001 |
| rs9292456   | 5 | 19001097 C  | 27 | 17 T  | 0.000186  |
| rs5866354   | 5 | 19004633 A  | 27 | 17 AT | 0.000186  |
| rs4537064   | 5 | 19011415 A  | 27 | 17 C  | 0.000186  |
| rs7731960   | 5 | 19011714 T  | 27 | 17 C  | 0.000186  |
| rs111988657 | 5 | 19100793 A  | 16 | 6 T   | 0.0005436 |
| rs77644860  | 5 | 19102912 T  | 16 | 6 TC  | 0.0005436 |
| rs78836818  | 5 | 19105611 T  | 16 | 6 C   | 0.0005436 |
| rs11441553  | 5 | 19106020 GT | 16 | 6 G   | 0.0005436 |
| rs200889621 | 5 | 19109088 CT | 15 | 4 C   | 0.0001909 |
| rs79882907  | 5 | 19109585 G  | 16 | 6 A   | 0.0005436 |
| rs76054915  | 5 | 19110676 TG | 16 | 6 T   | 0.0005436 |
| rs78954403  | 5 | 19111751 T  | 16 | 6 TA  | 0.0005436 |
| rs7442872   | 5 | 19112897 T  | 16 | 6 C   | 0.0005436 |
| rs73759603  | 5 | 19114103 T  | 16 | 6 A   | 0.0005436 |
| rs73759606  | 5 | 19115514 G  | 16 | 6 T   | 0.0005436 |
| rs59439678  | 5 | 19118412 A  | 16 | 6 G   | 0.0005436 |
| rs74624881  | 5 | 19118807 G  | 16 | 6 A   | 0.0005436 |
| rs76198877  | 5 | 19120349 G  | 16 | 6 T   | 0.0005436 |
| rs11956374  | 5 | 19120681 T  | 16 | 6 C   | 0.0005436 |
| rs11960467  | 5 | 19120884 C  | 16 | 6 T   | 0.0005436 |
| rs36114787  | 5 | 19121081 C  | 16 | 6 CG  | 0.0005436 |
| rs73759608  | 5 | 19121365 G  | 16 | 6 A   | 0.0005436 |
| rs76591709  | 5 | 19121718 T  | 16 | 6 C   | 0.0005436 |
| rs59487235  | 5 | 19123299 G  | 16 | 6 A   | 0.0005436 |
| rs57533008  | 5 | 19125248 G  | 16 | 6 A   | 0.0005436 |
| rs79052914  | 5 | 19127280 T  | 16 | 6 C   | 0.0005436 |
| rs11950664  | 5 | 19148922 T  | 16 | 6 C   | 0.0005436 |
| rs202053412 | 5 | 19162349 G  | 16 | 6 GA  | 0.0005436 |
| rs200432192 | 5 | 19163455 T  | 15 | 5 C   | 0.0003715 |
| rs192918603 | 5 | 19166903 G  | 20 | 11 T  | 0.0008202 |
| rs10941087  | 5 | 19171347 A  | 20 | 11 G  | 0.0008202 |
| rs4546383   | 5 | 19174117 T  | 20 | 11 G  | 0.0008202 |
| rs56127401  | 5 | 19175816 G  | 20 | 11 A  | 0.0008202 |
| rs11954805  | 5 | 19179319 C  | 20 | 11 T  | 0.0008202 |
| rs67595693  | 5 | 19181373 C  | 20 | 11 T  | 0.0008202 |
| rs56010419  | 5 | 19181660 C  | 20 | 11 T  | 0.0008202 |
| rs28753870  | 5 | 19183204 G  | 20 | 11 T  | 0.0008202 |
| rs10461927  | 5 | 19183422 C  | 20 | 11 T  | 0.0008202 |

|             |   |             |    |       |            |
|-------------|---|-------------|----|-------|------------|
| rs67749574  | 5 | 19184078 C  | 20 | 11 T  | 0.0008202  |
| rs4492113   | 5 | 19185179 C  | 20 | 11 A  | 0.0008202  |
| rs10461707  | 5 | 19185427 T  | 20 | 11 A  | 0.0008202  |
| rs10055960  | 5 | 19185900 A  | 20 | 11 G  | 0.0008202  |
| rs10056045  | 5 | 19186087 C  | 20 | 11 G  | 0.0008202  |
| rs35630947  | 5 | 19186390 G  | 20 | 11 GA | 0.0008202  |
| rs4409093   | 5 | 19186620 T  | 20 | 11 C  | 0.0008202  |
| rs59242851  | 5 | 19186881 TA | 16 | 6 T   | 0.0005436  |
| rs10073850  | 5 | 19187322 T  | 20 | 11 C  | 0.0008202  |
| rs143565175 | 5 | 19187627 G  | 20 | 11 C  | 0.0008202  |
| rs1512548   | 5 | 19399602 T  | 16 | 5 C   | 0.0001588  |
| rs2137386   | 5 | 19413622 C  | 17 | 6 T   | 0.0002592  |
| rs3032401   | 5 | 19413874 T  | 17 | 6 TAA | 0.0002592  |
| rs2137389   | 5 | 19417376 A  | 17 | 6 G   | 0.0002592  |
| rs76966134  | 5 | 24866179 A  | 7  | 0 G   | 0.0008679  |
| rs77157809  | 5 | 24866294 T  | 7  | 0 C   | 0.0008679  |
| rs74730385  | 5 | 24867181 A  | 7  | 0 G   | 0.0008679  |
| rs12513781  | 5 | 25620280 A  | 8  | 37 G  | 0.0008686  |
| rs66820692  | 5 | 28635368 T  | 31 | 24 A  | 0.0004543  |
| rs6450656   | 5 | 28648576 A  | 17 | 59 C  | 0.0000866  |
| rs7722988   | 5 | 28648707 T  | 17 | 59 C  | 0.0000866  |
| rs7736782   | 5 | 28656324 A  | 15 | 51 G  | 0.0006974  |
| rs11347966  | 5 | 37158892 A  | 8  | 0 AT  | 0.0003372  |
| rs76348379  | 5 | 37901402 T  | 8  | 0 C   | 0.0003016  |
| rs76564102  | 5 | 37903568 A  | 7  | 0 C   | 0.0008679  |
| rs3836796   | 5 | 39289543 GT | 11 | 42 G  | 0.0007112  |
| rs34525658  | 5 | 39427198 A  | 21 | 9 C   | 0.00009415 |
| rs35950587  | 5 | 39429785 A  | 20 | 10 C  | 0.0005561  |
| rs34209642  | 5 | 39430941 A  | 20 | 10 G  | 0.0005561  |
| rs6877573   | 5 | 39432245 C  | 20 | 10 G  | 0.0005561  |
| rs7703879   | 5 | 39434349 A  | 20 | 10 G  | 0.0005561  |
| rs76402156  | 5 | 42917370 A  | 16 | 7 G   | 0.0009539  |
| rs10066777  | 5 | 59174758 G  | 9  | 1 C   | 0.000839   |
| rs346406    | 5 | 62490220 G  | 16 | 5 A   | 0.0001588  |
| rs346407    | 5 | 62491973 T  | 14 | 4 C   | 0.0003939  |
| rs346408    | 5 | 62493050 C  | 14 | 4 T   | 0.0003939  |
| rs346403    | 5 | 62493840 T  | 14 | 4 C   | 0.0003939  |
| rs186968    | 5 | 62498557 C  | 16 | 5 T   | 0.0001588  |
| rs455779    | 5 | 62500313 A  | 14 | 4 G   | 0.0003939  |
| rs346409    | 5 | 62508981 C  | 14 | 4 G   | 0.0003939  |
| rs164103    | 5 | 62512669 G  | 14 | 4 A   | 0.0003939  |

|             |   |                       |    |        |           |
|-------------|---|-----------------------|----|--------|-----------|
| rs346405    | 5 | 62513738 C            | 14 | 4 A    | 0.0003939 |
| rs347669    | 5 | 62523431 G            | 14 | 4 A    | 0.0003939 |
| rs347670    | 5 | 62526755 C            | 14 | 4 T    | 0.0003939 |
| rs164105    | 5 | 62528445 A            | 14 | 4 G    | 0.0003939 |
| rs346420    | 5 | 62529212 G            | 14 | 4 T    | 0.0003939 |
| rs346421    | 5 | 62529983 T            | 14 | 4 G    | 0.0003939 |
| rs346423    | 5 | 62532892 G            | 14 | 4 A    | 0.0003939 |
| 5:63924273  | 5 | 63924273 GA           | 10 | 2 G    | 0.0009067 |
| rs62360705  | 5 | 71028274 A            | 7  | 0 G    | 0.0008679 |
| rs60286869  | 5 | 71028824 T            | 7  | 0 C    | 0.0008679 |
| rs62360707  | 5 | 71029427 T            | 7  | 0 C    | 0.0008679 |
| rs4057259   | 5 | 71029730 C            | 7  | 0 G    | 0.0008679 |
| rs4057258   | 5 | 71029743 C            | 7  | 0 T    | 0.0008679 |
| rs3857386   | 5 | 71029835 T            | 7  | 0 TCTC | 0.0008679 |
| rs78111196  | 5 | 71030187 G            | 7  | 0 A    | 0.0008679 |
| rs201230349 | 5 | 71033734 AT           | 7  | 0 A    | 0.0008679 |
| rs77510257  | 5 | 73708375 A            | 7  | 0 T    | 0.0008679 |
| rs59857064  | 5 | 73735191 T            | 9  | 1 A    | 0.0007194 |
| rs76518990  | 5 | 73736642 G            | 8  | 0 A    | 0.0003016 |
| rs7736553   | 5 | 73737072 C            | 8  | 0 A    | 0.0003016 |
| rs17736697  | 5 | 73738367 C            | 8  | 0 T    | 0.0003016 |
| rs74968908  | 5 | 73741967 G            | 8  | 0 A    | 0.0003016 |
| rs78116060  | 5 | 73745351 A            | 8  | 0 G    | 0.0003016 |
| rs79114589  | 5 | 73746799 T            | 8  | 0 G    | 0.0003016 |
| rs76655003  | 5 | 73747050 G            | 8  | 0 A    | 0.0003016 |
| rs77379635  | 5 | 73748608 T            | 8  | 0 C    | 0.0003016 |
| rs75776784  | 5 | 73749080 C            | 7  | 0 G    | 0.0008679 |
| rs1873365   | 5 | 73749892 G            | 8  | 0 A    | 0.0003016 |
| rs1873364   | 5 | 73750044 C            | 8  | 0 T    | 0.0003016 |
| rs7729784   | 5 | 73750685 A            | 8  | 0 G    | 0.0003016 |
| rs144616208 | 5 | 73760442 AGAAAAGGTCGT | 7  | 0 A    | 0.0008679 |
| rs13156710  | 5 | 73760792 A            | 9  | 0 T    | 0.0001034 |
| rs78691613  | 5 | 73760961 C            | 0  | 18 T   | 0.0001312 |
| rs4621539   | 5 | 73767751 T            | 7  | 36 C   | 0.0006165 |
| rs73113802  | 5 | 75515494 C            | 11 | 2 G    | 0.0004434 |
| rs74616192  | 5 | 75515504 T            | 11 | 2 C    | 0.0004434 |
| rs75055749  | 5 | 75515958 G            | 11 | 2 A    | 0.0004434 |
| rs77096726  | 5 | 75517297 A            | 11 | 2 G    | 0.0004434 |
| rs79502197  | 5 | 75519156 G            | 11 | 2 A    | 0.0004434 |
| rs6884651   | 5 | 75538661 C            | 11 | 2 T    | 0.0004434 |
| rs80286446  | 5 | 75538689 C            | 11 | 2 A    | 0.0004434 |

|             |   |             |    |         |            |
|-------------|---|-------------|----|---------|------------|
| rs61497857  | 5 | 75538893 A  | 11 | 2 G     | 0.0004434  |
| rs11740431  | 5 | 75540890 A  | 36 | 31 G    | 0.0003502  |
| rs56264728  | 5 | 75541183 T  | 36 | 31 G    | 0.0003502  |
| rs28587768  | 5 | 75541811 A  | 36 | 31 G    | 0.0003502  |
| rs145224048 | 5 | 75544482 T  | 10 | 1 C     | 0.00021    |
| rs1847060   | 5 | 75544538 G  | 36 | 32 A    | 0.0006397  |
| rs6879020   | 5 | 75545035 G  | 36 | 32 A    | 0.0006397  |
| rs11748793  | 5 | 75548176 T  | 36 | 31 C    | 0.0003502  |
| rs10055247  | 5 | 75549475 G  | 36 | 29 A    | 0.0002973  |
| rs10045181  | 5 | 75549745 A  | 36 | 30 C    | 0.000303   |
| rs10040087  | 5 | 75550007 A  | 37 | 32 G    | 0.0003248  |
| rs6862529   | 5 | 75551209 T  | 36 | 30 C    | 0.000303   |
| rs55973414  | 5 | 75551315 G  | 39 | 32 A    | 0.00004458 |
| rs10035663  | 5 | 75551739 G  | 11 | 2 C     | 0.0004434  |
| rs6868455   | 5 | 76398623 T  | 4  | 28 C    | 0.0008078  |
| rs13358038  | 5 | 76404051 A  | 4  | 28 G    | 0.0008078  |
| rs4703726   | 5 | 76404238 A  | 4  | 28 G    | 0.0008078  |
| rs4703727   | 5 | 76407577 C  | 4  | 28 T    | 0.0008078  |
| rs4437352   | 5 | 76412745 T  | 12 | 45 C    | 0.0009266  |
| rs10037303  | 5 | 76413897 C  | 6  | 33 T    | 0.0009098  |
| rs2055432   | 5 | 78988769 A  | 15 | 51 C    | 0.0006974  |
| rs116556111 | 5 | 85770112 C  | 7  | 0 T     | 0.0008679  |
| rs16902245  | 5 | 85770686 C  | 7  | 0 T     | 0.0008679  |
| rs10065803  | 5 | 85771235 G  | 7  | 0 A     | 0.0008679  |
| rs13358838  | 5 | 85775350 C  | 7  | 0 T     | 0.0008679  |
| rs73142510  | 5 | 85778295 T  | 7  | 0 G     | 0.0008679  |
| rs73142511  | 5 | 85778425 G  | 7  | 0 T     | 0.0008679  |
| rs73142516  | 5 | 85780087 T  | 7  | 0 C     | 0.0008679  |
| rs74601594  | 5 | 85781523 C  | 7  | 0 T     | 0.0008679  |
| 5:85784243  | 5 | 85784243 GT | 7  | 0 G     | 0.0008679  |
| rs77942162  | 5 | 85791830 C  | 7  | 0 T     | 0.0008679  |
| rs74616050  | 5 | 85792031 C  | 7  | 0 T     | 0.0008679  |
| rs73142527  | 5 | 85792215 T  | 7  | 0 G     | 0.0008679  |
| rs75482133  | 5 | 85792829 A  | 7  | 0 G     | 0.0008679  |
| rs10053075  | 5 | 85793391 G  | 7  | 0 T     | 0.0008679  |
| rs10038807  | 5 | 85793781 C  | 7  | 0 A     | 0.0008679  |
| rs10057196  | 5 | 85795217 C  | 7  | 0 T     | 0.0008679  |
| rs141369087 | 5 | 85795562 T  | 8  | 0 TGATA | 0.0003016  |
| rs75017161  | 5 | 85795906 G  | 7  | 0 T     | 0.0008679  |
| rs73142537  | 5 | 85796600 G  | 7  | 0 A     | 0.0008679  |
| rs78018415  | 5 | 85796652 A  | 7  | 0 AT    | 0.0008679  |

|             |   |                     |    |               |           |
|-------------|---|---------------------|----|---------------|-----------|
| rs73142540  | 5 | 85796915 C          | 7  | 0 T           | 0.0008679 |
| rs73142543  | 5 | 85797158 C          | 7  | 0 T           | 0.0008679 |
| rs4920666   | 5 | 85801789 G          | 7  | 0 T           | 0.0008679 |
| rs55687655  | 5 | 86972361 C          | 23 | 14 T          | 0.0007414 |
| rs12186390  | 5 | 86998366 T          | 23 | 14 C          | 0.0007414 |
| 5:94344766  | 5 | 94344766 A          | 24 | 14 G          | 0.0004114 |
| 5:94344769  | 5 | 94344769 G          | 25 | 14 A          | 0.0002032 |
| 5:94344774  | 5 | 94344774 A          | 24 | 14 G          | 0.0004114 |
| rs145531067 | 5 | 94761820 A          | 14 | 5 ATATATATG   | 0.0006534 |
| rs6556941   | 5 | 96218598 T          | 7  | 0 C           | 0.0008679 |
| 5:96366336  | 5 | 96366336 C          | 9  | 1 G           | 0.0007194 |
| rs114487483 | 5 | 99678415 C          | 6  | 34 T          | 0.0002428 |
| rs2400601   | 5 | 100976362 T         | 7  | 0 G           | 0.0008679 |
| rs62357464  | 5 | 106619434 C         | 16 | 6 G           | 0.000589  |
| 5:115814627 | 5 | 115814627 G         | 20 | 11 T          | 0.0008202 |
| rs199731665 | 5 | 116877468 T         | 8  | 0 TACATCTACAC | 0.0003776 |
| rs199590016 | 5 | 116877483 G         | 8  | 0 A           | 0.0003372 |
| rs36138399  | 5 | 117187732 C         | 3  | 24 G          | 0.0009363 |
| rs4012925   | 5 | 118273667 T         | 7  | 0 TTTG        | 0.0008679 |
| rs6898332   | 5 | 122648541 G         | 7  | 35 C          | 0.0007198 |
| rs10900782  | 5 | 125403809 G         | 29 | 21 A          | 0.0005775 |
| rs1421870   | 5 | 125405191 C         | 28 | 20 A          | 0.0005398 |
| rs35006655  | 5 | 125406364 AATGTTTGC | 28 | 20 A          | 0.0005398 |
| rs13167197  | 5 | 125408090 C         | 29 | 20 T          | 0.0003112 |
| rs10213871  | 5 | 125409767 G         | 28 | 20 A          | 0.0005398 |
| rs6895992   | 5 | 125411032 T         | 28 | 20 A          | 0.0005398 |
| rs10064839  | 5 | 125412411 G         | 28 | 20 A          | 0.0005398 |
| rs10051723  | 5 | 125413290 A         | 28 | 20 G          | 0.0005398 |
| rs10076671  | 5 | 125414225 T         | 28 | 20 C          | 0.0005398 |
| rs3909303   | 5 | 125421873 T         | 22 | 13 C          | 0.0006749 |
| rs6878605   | 5 | 125424091 G         | 21 | 12 A          | 0.0009318 |
| rs3849073   | 5 | 125434497 A         | 28 | 20 G          | 0.0005398 |
| rs10478682  | 5 | 125437788 C         | 28 | 20 A          | 0.0005398 |
| rs5007293   | 5 | 125439855 C         | 28 | 20 A          | 0.0005398 |
| rs1383555   | 5 | 125440053 C         | 28 | 20 T          | 0.0005398 |
| rs1383556   | 5 | 125440179 G         | 28 | 20 C          | 0.0005398 |
| rs12520267  | 5 | 125441239 T         | 28 | 20 A          | 0.0005398 |
| rs12520368  | 5 | 125441739 T         | 28 | 20 C          | 0.0005398 |
| rs13188435  | 5 | 125442155 C         | 28 | 20 T          | 0.0005398 |
| rs5871191   | 5 | 125445019 G         | 28 | 20 GT         | 0.0005398 |
| rs6861867   | 5 | 125451685 A         | 28 | 20 G          | 0.0005398 |



|             |   |                  |    |       |           |
|-------------|---|------------------|----|-------|-----------|
| rs11241867  | 5 | 125458387 C      | 16 | 7 T   | 0.0009539 |
| rs7728215   | 5 | 125461790 A      | 16 | 7 G   | 0.0009539 |
| rs10054533  | 5 | 125462485 C      | 16 | 7 T   | 0.0009539 |
| rs3849075   | 5 | 125466176 G      | 16 | 7 A   | 0.0009539 |
| rs11739456  | 5 | 125467005 G      | 29 | 21 C  | 0.0005775 |
| rs10463817  | 5 | 125471402 G      | 29 | 22 T  | 0.0007063 |
| rs75509873  | 5 | 125475752 AG     | 30 | 23 A  | 0.0007082 |
| rs10477666  | 5 | 125478358 C      | 29 | 22 A  | 0.0007063 |
| rs374455672 | 5 | 125482719 ATAAAG | 29 | 22 A  | 0.0007063 |
| rs140272168 | 5 | 125486927 G      | 29 | 22 A  | 0.0007063 |
| rs140084416 | 5 | 125487289 CTCTG  | 29 | 22 C  | 0.0007063 |
| rs6888912   | 5 | 125489390 C      | 29 | 22 T  | 0.0007063 |
| rs6870502   | 5 | 125489767 T      | 29 | 22 C  | 0.0007063 |
| rs3843819   | 5 | 125496145 C      | 22 | 12 T  | 0.000477  |
| rs3898923   | 5 | 125498708 C      | 25 | 16 T  | 0.0005585 |
| rs3909804   | 5 | 125507018 A      | 23 | 14 C  | 0.0007414 |
| rs10061705  | 5 | 125507903 T      | 23 | 14 C  | 0.0007414 |
| rs10900783  | 5 | 125512816 T      | 23 | 14 C  | 0.0007414 |
| rs2081831   | 5 | 125530928 C      | 16 | 7 A   | 0.0009539 |
| rs7718533   | 5 | 125533158 T      | 23 | 14 G  | 0.0007414 |
| rs13359614  | 5 | 125550942 C      | 24 | 14 T  | 0.0003806 |
| rs115455679 | 5 | 125554997 T      | 2  | 22 C  | 0.0009583 |
| rs35450346  | 5 | 125618844 C      | 24 | 15 CA | 0.0009958 |
| rs6878654   | 5 | 131627401 A      | 16 | 54 T  | 0.0003907 |
| rs199725847 | 5 | 142367103 T      | 18 | 9 TA  | 0.0009279 |
| rs245723    | 5 | 142367558 T      | 18 | 9 A   | 0.0009279 |
| rs151975    | 5 | 142369812 A      | 18 | 9 G   | 0.0009279 |
| rs143838874 | 5 | 142373382 TTTTTC | 16 | 7 T   | 0.0009539 |
| rs151972    | 5 | 142375982 G      | 18 | 9 T   | 0.0009279 |
| rs13162212  | 5 | 142377013 A      | 19 | 9 G   | 0.0004395 |
| rs7721905   | 5 | 142379626 G      | 19 | 9 A   | 0.0004395 |
| rs728465    | 5 | 142384160 C      | 19 | 9 T   | 0.0004395 |
| rs1438724   | 5 | 142385141 T      | 19 | 9 G   | 0.0004395 |
| rs245848    | 5 | 142386578 C      | 18 | 9 T   | 0.0009279 |
| rs4912888   | 5 | 142387103 G      | 19 | 9 A   | 0.0004395 |
| rs3822398   | 5 | 142387961 C      | 19 | 9 T   | 0.0004395 |
| rs10875598  | 5 | 142391158 C      | 19 | 9 T   | 0.0004395 |
| rs3822397   | 5 | 142393562 G      | 19 | 9 A   | 0.0004395 |
| rs11313040  | 5 | 142394088 A      | 18 | 9 AG  | 0.0009279 |
| rs245813    | 5 | 142397025 T      | 18 | 9 A   | 0.0009279 |
| rs245816    | 5 | 142398445 C      | 18 | 9 T   | 0.0009279 |

|             |   |                |    |               |            |
|-------------|---|----------------|----|---------------|------------|
| rs245817    | 5 | 142400297 A    | 18 | 9 G           | 0.0009279  |
| rs245818    | 5 | 142400947 G    | 18 | 9 A           | 0.0009279  |
| rs188696155 | 5 | 144093281 A    | 3  | 25 G          | 0.0009258  |
| rs7700566   | 5 | 145734375 A    | 0  | 15 G          | 0.0005628  |
| rs57060750  | 5 | 145735566 T    | 0  | 15 TA         | 0.0005628  |
| rs17653203  | 5 | 148295775 G    | 14 | 5 C           | 0.0008508  |
| rs353244    | 5 | 148826915 A    | 15 | 52 C          | 0.0006042  |
| rs2748247   | 5 | 149794412 A    | 16 | 53 G          | 0.0006806  |
| rs60404047  | 5 | 149850518 G    | 15 | 4 A           | 0.000175   |
| rs73272621  | 5 | 149854482 G    | 14 | 4 A           | 0.0003939  |
| rs79664277  | 5 | 149859889 A    | 16 | 4 G           | 0.00007821 |
| rs73272643  | 5 | 149860190 G    | 16 | 4 A           | 0.00007821 |
| rs75528239  | 5 | 149862325 G    | 13 | 4 A           | 0.000883   |
| rs76358617  | 5 | 149862396 T    | 13 | 4 C           | 0.000883   |
| rs73272649  | 5 | 149862885 T    | 16 | 4 C           | 0.00007821 |
| rs148685493 | 5 | 149864258 T    | 13 | 4 C           | 0.000883   |
| rs12520805  | 5 | 149864390 A    | 13 | 4 G           | 0.000883   |
| rs150900613 | 5 | 149866587 A    | 13 | 4 AC          | 0.000883   |
| rs12519213  | 5 | 149867885 A    | 13 | 4 C           | 0.000883   |
| rs12519820  | 5 | 149868277 A    | 13 | 4 G           | 0.000883   |
| rs12519827  | 5 | 149868326 A    | 16 | 4 G           | 0.00007821 |
| rs79152136  | 5 | 149868870 C    | 16 | 4 T           | 0.00007821 |
| rs7736222   | 5 | 149869381 C    | 15 | 4 T           | 0.000175   |
| rs111288376 | 5 | 149869528 A    | 13 | 4 T           | 0.000883   |
| rs7716964   | 5 | 149870057 G    | 16 | 4 A           | 0.00007821 |
| rs3846704   | 5 | 149871216 C    | 16 | 4 T           | 0.00007821 |
| rs3846705   | 5 | 149871333 C    | 16 | 4 T           | 0.00007821 |
| rs17726511  | 5 | 149871484 T    | 16 | 4 G           | 0.00007821 |
| rs17799481  | 5 | 149871771 C    | 16 | 4 T           | 0.00007821 |
| rs139250076 | 5 | 149872188 ATTC | 16 | 4 A           | 0.00007821 |
| rs78946830  | 5 | 149872650 G    | 13 | 4 C           | 0.000883   |
| rs74942585  | 5 | 149872666 C    | 16 | 4 T           | 0.00007821 |
| rs368595259 | 5 | 149873741 C    | 13 | 3 CA          | 0.0001069  |
| rs17726541  | 5 | 149873850 A    | 15 | 4 G           | 0.000175   |
| rs112209415 | 5 | 149873904 CT   | 13 | 2 C           | 0.00006438 |
| rs138831508 | 5 | 149874235 C    | 15 | 5 CTCCTTTCTTT | 0.0003715  |
| rs112171844 | 5 | 149874411 C    | 17 | 4 T           | 0.0000182  |
| rs3846706   | 5 | 149875731 G    | 16 | 4 A           | 0.00007821 |
| rs3846707   | 5 | 149875858 C    | 16 | 4 T           | 0.00007821 |
| rs11167503  | 5 | 149876876 C    | 16 | 4 T           | 0.00007821 |
| rs11167504  | 5 | 149876885 C    | 16 | 4 T           | 0.00007821 |

|             |   |                 |    |           |            |
|-------------|---|-----------------|----|-----------|------------|
| rs28372763  | 5 | 149877270 T     | 13 | 4 C       | 0.000883   |
| rs57772388  | 5 | 149877773 T     | 16 | 4 A       | 0.00007821 |
| rs2343814   | 5 | 149878801 G     | 16 | 4 A       | 0.00007821 |
| rs2343813   | 5 | 149878840 T     | 16 | 4 C       | 0.00007821 |
| rs4428396   | 5 | 149878988 C     | 16 | 4 T       | 0.00007821 |
| rs74877579  | 5 | 149879246 T     | 13 | 4 C       | 0.000883   |
| rs76873130  | 5 | 149879332 A     | 13 | 4 G       | 0.000883   |
| rs35224765  | 5 | 149879853 AG    | 16 | 4 A       | 0.00007821 |
| rs3889713   | 5 | 149882183 C     | 16 | 4 T       | 0.00007821 |
| rs17726577  | 5 | 149884424 A     | 15 | 4 G       | 0.000175   |
| rs113681861 | 5 | 149885169 C     | 13 | 4 G       | 0.000883   |
| rs973319    | 5 | 153303618 C     | 16 | 53 T      | 0.0006806  |
| rs1461238   | 5 | 153304416 C     | 16 | 53 T      | 0.0006806  |
| rs35257267  | 5 | 153304538 T     | 16 | 53 C      | 0.0006806  |
| rs970751    | 5 | 153305796 T     | 16 | 53 C      | 0.0006806  |
| rs386248    | 5 | 153308317 T     | 16 | 53 G      | 0.0006806  |
| rs35910531  | 5 | 153310336 TAAAA | 16 | 54 T      | 0.0003907  |
| rs406708    | 5 | 153311032 A     | 16 | 53 G      | 0.0006806  |
| rs432891    | 5 | 153311464 C     | 16 | 53 T      | 0.0006806  |
| rs394446    | 5 | 153311841 G     | 16 | 53 A      | 0.0006806  |
| rs381582    | 5 | 153312282 A     | 16 | 53 G      | 0.0006806  |
| rs454317    | 5 | 153312771 A     | 16 | 53 G      | 0.0006806  |
| rs201644188 | 5 | 153313518 G     | 16 | 53 GAGACA | 0.0006806  |
| rs448234    | 5 | 153315300 A     | 16 | 53 G      | 0.0006806  |
| rs1438586   | 5 | 153315743 C     | 16 | 53 A      | 0.0006806  |
| rs11167651  | 5 | 153322296 A     | 16 | 53 C      | 0.0006806  |
| rs4349768   | 5 | 153323126 A     | 16 | 53 C      | 0.0006806  |
| rs690091    | 5 | 153323948 G     | 16 | 53 A      | 0.0006806  |
| rs557697    | 5 | 153324256 C     | 16 | 53 A      | 0.0006806  |
| rs689836    | 5 | 153324406 G     | 16 | 53 A      | 0.0006806  |
| rs2560068   | 5 | 153330453 T     | 16 | 53 C      | 0.0006806  |
| rs5872353   | 5 | 153336184 CT    | 16 | 53 C      | 0.0006806  |
| rs11355335  | 5 | 153337255 TA    | 16 | 53 T      | 0.0006806  |
| rs286958    | 5 | 153338048 T     | 16 | 53 C      | 0.0006806  |
| rs286959    | 5 | 153338516 C     | 16 | 53 T      | 0.0006806  |
| rs286961    | 5 | 153341404 C     | 16 | 53 G      | 0.0006806  |
| rs2560050   | 5 | 153346190 G     | 16 | 53 C      | 0.0006806  |
| rs4958688   | 5 | 153351519 G     | 16 | 53 A      | 0.0006806  |
| rs4958689   | 5 | 153351720 T     | 16 | 53 C      | 0.0006806  |
| rs10053993  | 5 | 153355854 A     | 16 | 53 G      | 0.0006806  |
| rs12153343  | 5 | 158964827 T     | 14 | 51 A      | 0.000328   |

|             |   |                        |    |            |           |
|-------------|---|------------------------|----|------------|-----------|
| rs10708390  | 5 | 158972532 C            | 12 | 46 CT      | 0.0005428 |
| rs10051643  | 5 | 159636258 C            | 28 | 20 T       | 0.0005398 |
| rs10080214  | 5 | 159639563 T            | 28 | 20 C       | 0.0005398 |
| rs10605034  | 5 | 159641155 A            | 24 | 16 T       | 0.0005508 |
| rs113426544 | 5 | 159642534 G            | 28 | 20 A       | 0.0005398 |
| rs11957752  | 5 | 159648920 A            | 27 | 19 G       | 0.0008555 |
| rs77519178  | 5 | 159682737 G            | 13 | 3 A        | 0.0002409 |
| rs4921273   | 5 | 159699709 C            | 4  | 30 A       | 0.0002486 |
| rs17057596  | 5 | 159704258 A            | 4  | 30 G       | 0.0002486 |
| rs1363151   | 5 | 162756297 A            | 9  | 1 T        | 0.0007194 |
| rs1421840   | 5 | 162773548 G            | 14 | 5 A        | 0.0008508 |
| rs62394934  | 5 | 162979499 T            | 9  | 1 A        | 0.0007194 |
| 5:166406201 | 5 | 166406201 A            | 2  | 26 AG      | 0.0001452 |
| 5:166406205 | 5 | 166406205 GCAGCAGCAGCA | 2  | 23 G       | 0.0005167 |
| rs6555877   | 5 | 169331938 A            | 10 | 44 G       | 0.000219  |
| rs6871299   | 5 | 169334914 T            | 10 | 44 C       | 0.000219  |
| rs11740615  | 5 | 169340765 T            | 10 | 45 G       | 0.0001954 |
| rs11741522  | 5 | 169341951 A            | 11 | 44 C       | 0.0007768 |
| rs11741667  | 5 | 169342351 C            | 11 | 45 G       | 0.0004315 |
| rs11742527  | 5 | 169343217 A            | 11 | 45 G       | 0.0004315 |
| rs11749769  | 5 | 169343672 G            | 11 | 45 A       | 0.0004315 |
| rs6869528   | 5 | 169346855 A            | 11 | 44 G       | 0.0007768 |
| rs17560633  | 5 | 169347372 T            | 11 | 44 C       | 0.0007768 |
| rs978913    | 5 | 169348792 G            | 11 | 45 T       | 0.0004315 |
| rs978914    | 5 | 169348810 A            | 11 | 45 G       | 0.0004315 |
| 5:169452780 | 5 | 169452780 CTCCT        | 7  | 0 C        | 0.0008679 |
| rs3822730   | 5 | 171174254 G            | 17 | 55 C       | 0.000662  |
| rs3797456   | 5 | 172754364 G            | 18 | 9 A        | 0.0009279 |
| rs1421922   | 5 | 175476709 A            | 35 | 30 C       | 0.0006538 |
| rs200801611 | 5 | 175481459 A            | 35 | 30 G       | 0.0006538 |
| rs35312700  | 5 | 177525307 G            | 13 | 47 C       | 0.0009845 |
| rs146888227 | 5 | 177525995 A            | 13 | 47 ATTTTAT | 0.0009845 |
| rs142280981 | 5 | 177536822 CTTTA        | 32 | 26 C       | 0.0008799 |
| rs3812082   | 5 | 177547336 A            | 8  | 38 G       | 0.0005059 |
| rs67080522  | 5 | 177549802 G            | 17 | 7 C        | 0.0004382 |
| rs9392528   | 6 | 3839792 A              | 1  | 21 G       | 0.0002339 |
| rs9405266   | 6 | 5426228 A              | 13 | 47 G       | 0.0009845 |
| rs6906233   | 6 | 6125283 G              | 1  | 19 A       | 0.0008293 |
| rs9505065   | 6 | 7188487 C              | 11 | 44 T       | 0.0007768 |
| rs77563770  | 6 | 9702092 A              | 18 | 8 G        | 0.0005897 |
| 6:22830530  | 6 | 22830530 A             | 0  | 16 G       | 0.0002449 |

|             |   |                |    |      |            |
|-------------|---|----------------|----|------|------------|
| rs12198996  | 6 | 25166010 C     | 9  | 1 T  | 0.0007194  |
| rs10946818  | 6 | 26371006 A     | 3  | 25 G | 0.0009258  |
| rs78512949  | 6 | 28328293 A     | 8  | 0 G  | 0.0003016  |
| rs76043707  | 6 | 28338473 C     | 8  | 0 T  | 0.0003016  |
| rs78620132  | 6 | 28339253 C     | 8  | 0 T  | 0.0003016  |
| rs111669150 | 6 | 28362987 T     | 8  | 0 C  | 0.0003016  |
| rs17393066  | 6 | 28364793 G     | 8  | 0 A  | 0.0003016  |
| rs2232419   | 6 | 28367768 A     | 8  | 0 G  | 0.0003016  |
| rs10484541  | 6 | 28371346 C     | 8  | 0 G  | 0.0003016  |
| rs143000906 | 6 | 28374338 TA    | 8  | 0 T  | 0.0003016  |
| rs56241479  | 6 | 28389174 T     | 9  | 1 G  | 0.0007194  |
| rs200981348 | 6 | 28390484 TA    | 8  | 0 T  | 0.0003776  |
| rs61653240  | 6 | 28403541 TA    | 9  | 0 T  | 0.0001333  |
| rs2531807   | 6 | 28420013 G     | 8  | 0 A  | 0.0003016  |
| rs113145976 | 6 | 28438650 C     | 9  | 1 T  | 0.0007194  |
| rs200314214 | 6 | 28685339 T     | 34 | 31 C | 0.0009632  |
| rs4483030   | 6 | 30767129 T     | 16 | 7 C  | 0.0009539  |
| rs4711234   | 6 | 30768583 G     | 16 | 7 A  | 0.0009539  |
| rs9404967   | 6 | 30770375 G     | 27 | 20 A | 0.0008358  |
| rs9394015   | 6 | 30773640 T     | 29 | 21 C | 0.0005775  |
| rs9394016   | 6 | 30773899 C     | 29 | 21 T | 0.0005775  |
| rs12526945  | 6 | 30774522 C     | 29 | 21 T | 0.0005775  |
| rs28894972  | 6 | 30774687 A     | 29 | 21 G | 0.0005775  |
| rs35583979  | 6 | 30774724 C     | 17 | 6 CA | 0.00009264 |
| rs12664556  | 6 | 30775017 G     | 29 | 21 A | 0.0005775  |
| rs12661690  | 6 | 30775033 C     | 29 | 21 G | 0.0005775  |
| rs9378110   | 6 | 30775733 C     | 29 | 21 G | 0.0005775  |
| rs9391635   | 6 | 30775805 G     | 29 | 21 C | 0.0005775  |
| rs28986800  | 6 | 30775910 CCTGT | 29 | 21 C | 0.0005775  |
| rs9404970   | 6 | 30776174 T     | 17 | 6 C  | 0.0002592  |
| rs9404971   | 6 | 30776195 C     | 17 | 6 G  | 0.0002592  |
| rs9404972   | 6 | 30776229 C     | 29 | 21 T | 0.0005775  |
| rs9391693   | 6 | 30776393 A     | 17 | 6 G  | 0.0002592  |
| rs9295921   | 6 | 30776802 T     | 29 | 21 C | 0.0005775  |
| rs9295922   | 6 | 30776858 G     | 29 | 21 A | 0.0005775  |
| rs9368641   | 6 | 30777237 C     | 29 | 21 A | 0.0005775  |
| rs9380194   | 6 | 30777258 C     | 17 | 6 T  | 0.0002592  |
| rs9394017   | 6 | 30777604 G     | 29 | 21 A | 0.0005775  |
| rs9380196   | 6 | 30777648 C     | 29 | 21 A | 0.0005775  |
| rs9380197   | 6 | 30778203 A     | 29 | 21 G | 0.0005775  |
| rs9391695   | 6 | 30778685 C     | 17 | 6 G  | 0.0002592  |

|             |   |                    |    |       |            |
|-------------|---|--------------------|----|-------|------------|
| rs9391696   | 6 | 30778786 G         | 17 | 6 A   | 0.0002592  |
| rs9378224   | 6 | 30781748 C         | 17 | 6 A   | 0.0002592  |
| rs4286818   | 6 | 30781923 C         | 29 | 21 T  | 0.0005775  |
| rs2894046   | 6 | 30782105 C         | 29 | 21 T  | 0.0005775  |
| rs2394412   | 6 | 30782235 A         | 29 | 21 G  | 0.0005775  |
| rs2394413   | 6 | 30782303 T         | 29 | 21 C  | 0.0005775  |
| rs2894047   | 6 | 30782407 G         | 29 | 21 A  | 0.0005775  |
| rs139856443 | 6 | 30782619 ATCTTTATT | 29 | 21 A  | 0.0005775  |
| rs9368642   | 6 | 30782659 G         | 29 | 21 T  | 0.0005775  |
| rs9394019   | 6 | 30782672 G         | 29 | 21 C  | 0.0005775  |
| rs374749028 | 6 | 30782789 A         | 31 | 23 AT | 0.0003729  |
| rs4959052   | 6 | 30782883 C         | 29 | 21 T  | 0.0005775  |
| rs12524350  | 6 | 30782979 C         | 29 | 16 T  | 0.00004527 |
| rs13197101  | 6 | 30783099 C         | 24 | 13 T  | 0.0001334  |
| rs370961073 | 6 | 30783159 C         | 10 | 1 CT  | 0.0003065  |
| rs28744071  | 6 | 30783167 G         | 8  | 0 A   | 0.0003372  |
| rs71541425  | 6 | 30783274 C         | 29 | 21 A  | 0.0005775  |
| rs115857087 | 6 | 30783300 G         | 29 | 21 A  | 0.0005775  |
| rs71541427  | 6 | 30783311 C         | 29 | 21 T  | 0.0005775  |
| rs28744112  | 6 | 30783334 G         | 17 | 6 T   | 0.0002592  |
| rs28744185  | 6 | 30783530 A         | 17 | 6 C   | 0.0002592  |
| rs10807072  | 6 | 30783896 C         | 29 | 21 T  | 0.0005775  |
| rs10947100  | 6 | 30783977 A         | 17 | 6 G   | 0.0002592  |
| rs9405012   | 6 | 30784109 C         | 29 | 21 G  | 0.0005775  |
| rs9391810   | 6 | 30784170 T         | 17 | 6 G   | 0.0002592  |
| rs9405013   | 6 | 30784258 G         | 29 | 21 C  | 0.0005775  |
| rs9405014   | 6 | 30784259 T         | 17 | 6 C   | 0.0002592  |
| rs9391811   | 6 | 30784296 T         | 17 | 6 C   | 0.0002592  |
| rs9391812   | 6 | 30784353 C         | 17 | 6 G   | 0.0002592  |
| rs35401082  | 6 | 30784439 TC        | 29 | 21 T  | 0.0005775  |
| rs9295925   | 6 | 30784553 G         | 29 | 21 A  | 0.0005775  |
| rs9295926   | 6 | 30784700 C         | 29 | 21 G  | 0.0005775  |
| rs9348843   | 6 | 30786676 A         | 29 | 21 G  | 0.0005775  |
| rs11314302  | 6 | 30786832 C         | 29 | 21 CT | 0.0005775  |
| rs4713381   | 6 | 30786927 T         | 17 | 6 C   | 0.0002592  |
| rs28381566  | 6 | 30787309 CT        | 17 | 6 C   | 0.0002592  |
| rs9394020   | 6 | 30792698 C         | 29 | 21 T  | 0.0005775  |
| rs3888582   | 6 | 30794004 T         | 29 | 21 A  | 0.0005775  |
| rs4248151   | 6 | 30794346 C         | 29 | 21 T  | 0.0005775  |
| rs9262252   | 6 | 30828433 A         | 4  | 28 G  | 0.0008078  |
| rs2894059   | 6 | 30828434 A         | 4  | 28 G  | 0.0008078  |

|            |   |            |    |                          |           |
|------------|---|------------|----|--------------------------|-----------|
| rs3130797  | 6 | 30846088 T | 4  | 28 C                     | 0.0008078 |
| rs3094108  | 6 | 30850395 A | 4  | 28 G                     | 0.0008078 |
| rs3130780  | 6 | 30874308 T | 4  | 28 G                     | 0.0008078 |
| rs885905   | 6 | 30890431 A | 6  | 34 G                     | 0.0005004 |
| rs2257347  | 6 | 30892054 A | 6  | 32 G                     | 0.00098   |
| rs2532941  | 6 | 30892521 G | 6  | 35 A                     | 0.0002764 |
| rs1043483  | 6 | 30893728 C | 6  | 34 T                     | 0.0005004 |
| rs2532925  | 6 | 30899163 G | 6  | 35 A                     | 0.0002764 |
| rs2253588  | 6 | 30899377 C | 6  | 35 G                     | 0.0002764 |
| rs9368662  | 6 | 31156148 T | 22 | 12 G                     | 0.0004525 |
| rs9368663  | 6 | 31156155 T | 22 | 13 C                     | 0.0006663 |
| rs6929268  | 6 | 40704959 C | 6  | 36 A                     | 0.0001537 |
| rs9471531  | 6 | 41242200 G | 14 | 50 A                     | 0.0005849 |
| rs11754211 | 6 | 43106226 T | 14 | 4 C                      | 0.0003939 |
| rs78991495 | 6 | 47730859 A | 16 | 5 G                      | 0.0004508 |
| 6:55717970 | 6 | 55717970 T | 2  | 25 TAAAATAAAAATAAAAATAAA | 0.0001556 |
| rs681089   | 6 | 71036220 A | 35 | 29 G                     | 0.0003069 |
| rs9354914  | 6 | 71036721 A | 16 | 53 G                     | 0.0006806 |
| rs12524645 | 6 | 71036888 A | 16 | 53 G                     | 0.0006806 |
| rs13216351 | 6 | 71037050 G | 16 | 53 A                     | 0.0006806 |
| rs13199908 | 6 | 71037205 A | 16 | 53 G                     | 0.0006806 |
| rs34123608 | 6 | 71037266 G | 16 | 53 GA                    | 0.0006806 |
| rs11757241 | 6 | 71037412 T | 16 | 53 C                     | 0.0006806 |
| rs2203664  | 6 | 71037500 A | 16 | 53 C                     | 0.0006806 |
| rs696988   | 6 | 71038944 A | 34 | 29 G                     | 0.0006139 |
| rs718352   | 6 | 71039156 T | 16 | 53 C                     | 0.0006806 |
| rs6921980  | 6 | 71040195 A | 34 | 29 C                     | 0.0006139 |
| rs4299788  | 6 | 71041772 T | 16 | 53 C                     | 0.0006806 |
| rs4707778  | 6 | 71042128 T | 34 | 29 C                     | 0.0006139 |
| rs3106871  | 6 | 71042160 C | 34 | 29 T                     | 0.0006139 |
| rs479783   | 6 | 71042358 T | 34 | 29 C                     | 0.0006139 |
| rs58595644 | 6 | 71044616 T | 34 | 29 TG                    | 0.0006139 |
| rs1711715  | 6 | 71044871 T | 34 | 29 C                     | 0.0006139 |
| rs1739676  | 6 | 71044875 C | 34 | 29 T                     | 0.0006139 |
| rs1739675  | 6 | 71044892 A | 34 | 29 T                     | 0.0006139 |
| rs1829198  | 6 | 71045723 A | 16 | 53 G                     | 0.0006806 |
| rs1614788  | 6 | 71046269 T | 34 | 29 C                     | 0.0006139 |
| rs34203299 | 6 | 71046377 G | 14 | 47 GA                    | 0.0009636 |
| rs1321066  | 6 | 71047476 T | 34 | 29 C                     | 0.0006139 |
| rs1621078  | 6 | 71048428 A | 34 | 29 G                     | 0.0006139 |
| rs34308048 | 6 | 71048604 G | 34 | 29 GT                    | 0.0006139 |

|             |   |              |    |                  |           |
|-------------|---|--------------|----|------------------|-----------|
| rs1711724   | 6 | 71048651 G   | 34 | 29 A             | 0.0006139 |
| rs1589045   | 6 | 71048860 C   | 34 | 29 A             | 0.0006139 |
| rs1739668   | 6 | 71048886 T   | 34 | 29 G             | 0.0006139 |
| rs1711725   | 6 | 71048944 T   | 34 | 29 C             | 0.0006139 |
| rs9364081   | 6 | 71049401 T   | 16 | 53 A             | 0.0006806 |
| rs10155708  | 6 | 71050009 G   | 34 | 29 A             | 0.0006139 |
| rs10155683  | 6 | 71050033 T   | 34 | 29 C             | 0.0006139 |
| rs9364082   | 6 | 71050050 C   | 34 | 29 T             | 0.0006139 |
| rs9354917   | 6 | 71050154 A   | 34 | 29 G             | 0.0006139 |
| rs6907779   | 6 | 71050202 A   | 34 | 29 G             | 0.0006139 |
| rs1830499   | 6 | 71050871 T   | 16 | 53 C             | 0.0006806 |
| rs1590166   | 6 | 71051093 T   | 34 | 29 C             | 0.0006139 |
| rs70990303  | 6 | 71051438 CT  | 34 | 29 C             | 0.0006139 |
| rs1739665   | 6 | 71051475 C   | 34 | 29 T             | 0.0006139 |
| rs9346380   | 6 | 71052169 T   | 34 | 29 C             | 0.0006139 |
| rs9455058   | 6 | 71052661 G   | 16 | 53 A             | 0.0006806 |
| rs1092508   | 6 | 71052975 C   | 34 | 29 G             | 0.0006139 |
| rs1092259   | 6 | 71053500 A   | 34 | 29 G             | 0.0006139 |
| rs9342786   | 6 | 71053744 A   | 16 | 53 G             | 0.0006806 |
| rs4707782   | 6 | 71053876 T   | 16 | 53 C             | 0.0006806 |
| rs9455063   | 6 | 71055346 A   | 16 | 53 T             | 0.0006806 |
| rs781115    | 6 | 71055814 C   | 19 | 59 T             | 0.0006234 |
| rs80303828  | 6 | 72509127 C   | 15 | 5 T              | 0.0004343 |
| rs9341425   | 6 | 74175192 A   | 7  | 38 T             | 0.0001991 |
| rs9359036   | 6 | 74241438 T   | 8  | 38 C             | 0.0005059 |
| rs9343053   | 6 | 74246392 A   | 8  | 38 G             | 0.0005059 |
| rs9343054   | 6 | 74246847 A   | 8  | 38 G             | 0.0005059 |
| rs112254029 | 6 | 74249532 T   | 8  | 38 TC            | 0.0005059 |
| rs62438402  | 6 | 74249533 T   | 8  | 38 C             | 0.0005059 |
| rs656724    | 6 | 74252706 C   | 8  | 38 T             | 0.0005059 |
| rs616610    | 6 | 74258360 A   | 8  | 38 T             | 0.0005059 |
| rs36067667  | 6 | 74260951 GA  | 8  | 39 G             | 0.0004628 |
| rs61332147  | 6 | 74266085 A   | 7  | 38 AAAAAACAAAAAC | 0.0003582 |
| rs2643198   | 6 | 74269691 T   | 8  | 38 C             | 0.0005059 |
| rs11299381  | 6 | 74271069 GT  | 8  | 38 G             | 0.0005059 |
| rs534562    | 6 | 74283946 G   | 8  | 39 C             | 0.0004628 |
| rs9343056   | 6 | 74366061 A   | 6  | 33 C             | 0.0009098 |
| rs4145195   | 6 | 74379180 A   | 6  | 32 G             | 0.00098   |
| rs6453688   | 6 | 74379809 T   | 6  | 32 A             | 0.00098   |
| rs6921096   | 6 | 74381301 G   | 6  | 33 A             | 0.0009098 |
| rs375668817 | 6 | 74383626 TTG | 6  | 33 T             | 0.0009098 |



|             |   |                       |    |           |              |
|-------------|---|-----------------------|----|-----------|--------------|
| rs199867892 | 6 | 74383629 AACCCAGGAGGA | 6  | 33 A      | 0.0009098    |
| rs9446978   | 6 | 74385013 T            | 21 | 9 A       | 0.00008232   |
| rs9446979   | 6 | 74387591 A            | 6  | 32 C      | 0.00098      |
| rs1876700   | 6 | 74388742 T            | 6  | 32 A      | 0.00098      |
| rs4544874   | 6 | 74390391 C            | 6  | 32 G      | 0.00098      |
| rs6901285   | 6 | 74390527 G            | 6  | 32 A      | 0.00098      |
| rs2351307   | 6 | 74392921 A            | 6  | 32 G      | 0.00098      |
| rs9446981   | 6 | 74394785 A            | 6  | 33 G      | 0.0009098    |
| rs3907648   | 6 | 74395505 G            | 6  | 32 A      | 0.00098      |
| rs3050889   | 6 | 74397916 C            | 6  | 32 CTGTGA | 0.00098      |
| 6:79106259  | 6 | 79106259 T            | 14 | 4 TG      | 0.0004351    |
| 6:79106260  | 6 | 79106260 A            | 14 | 4 G       | 0.0003939    |
| 6:88836867  | 6 | 88836867 AATG         | 28 | 16 A      | 0.00003871   |
| rs11757976  | 6 | 88836870 G            | 29 | 14 A      | 0.000004298  |
| rs976832    | 6 | 92526806 C            | 16 | 6 T       | 0.0005436    |
| rs1498249   | 6 | 92529713 G            | 16 | 6 T       | 0.0005436    |
| rs2454253   | 6 | 92536582 T            | 16 | 6 C       | 0.0005436    |
| rs2454251   | 6 | 92536639 C            | 16 | 6 G       | 0.0005436    |
| rs2454250   | 6 | 92536643 T            | 16 | 6 C       | 0.0005436    |
| rs4457133   | 6 | 92537385 A            | 16 | 6 C       | 0.0005436    |
| rs4265011   | 6 | 92537625 A            | 16 | 6 G       | 0.0005436    |
| rs1498261   | 6 | 92539077 T            | 16 | 6 C       | 0.0005436    |
| rs1353700   | 6 | 92539213 A            | 16 | 6 G       | 0.0005436    |
| rs2501653   | 6 | 92548874 G            | 16 | 6 T       | 0.0005436    |
| rs2454273   | 6 | 92550258 C            | 16 | 6 A       | 0.0005436    |
| rs1979793   | 6 | 92553419 C            | 16 | 6 T       | 0.0005436    |
| rs35977654  | 6 | 92554141 C            | 16 | 6 T       | 0.0005436    |
| rs2255287   | 6 | 92559843 T            | 16 | 6 A       | 0.0005436    |
| rs2454269   | 6 | 92560297 C            | 16 | 6 A       | 0.0005436    |
| rs56164195  | 6 | 92582923 A            | 16 | 6 AC      | 0.0005436    |
| rs4707701   | 6 | 92584877 T            | 16 | 6 C       | 0.0005436    |
| rs946120    | 6 | 97544329 A            | 39 | 25 G      | 0.0000005193 |
| rs11361496  | 6 | 97545509 CT           | 39 | 32 C      | 0.00004458   |
| rs1206153   | 6 | 97546036 T            | 39 | 32 C      | 0.00004458   |
| rs1206159   | 6 | 97558136 A            | 38 | 30 G      | 0.00003943   |
| rs1737131   | 6 | 97558907 C            | 15 | 58 G      | 0.00002069   |
| rs1737132   | 6 | 97558912 T            | 15 | 58 G      | 0.00002069   |
| rs1206160   | 6 | 97561059 C            | 14 | 57 T      | 0.00001769   |
| rs1206161   | 6 | 97561088 C            | 14 | 57 T      | 0.00001769   |
| rs1206146   | 6 | 97563222 T            | 14 | 57 C      | 0.00001769   |
| rs25637     | 6 | 97563868 CTGTT        | 14 | 58 C      | 0.000008395  |

|            |   |                 |    |            |            |
|------------|---|-----------------|----|------------|------------|
| rs1206147  | 6 | 97565173 G      | 14 | 58 A       | 0.00008395 |
| rs1206148  | 6 | 97566464 T      | 14 | 56 C       | 0.00001636 |
| rs1206149  | 6 | 97566938 A      | 14 | 51 G       | 0.000328   |
| rs1206150  | 6 | 97568482 G      | 15 | 57 A       | 0.00004089 |
| rs1206151  | 6 | 97568613 T      | 15 | 57 C       | 0.00004089 |
| rs1206152  | 6 | 97568963 C      | 15 | 57 A       | 0.00004089 |
| rs9285408  | 6 | 97571877 T      | 15 | 51 C       | 0.0006974  |
| rs1206166  | 6 | 97572581 C      | 15 | 57 T       | 0.00004089 |
| rs1206167  | 6 | 97572903 G      | 15 | 57 A       | 0.00004089 |
| rs1206168  | 6 | 97573678 C      | 15 | 57 A       | 0.00004089 |
| rs1206169  | 6 | 97573953 T      | 15 | 57 C       | 0.00004089 |
| rs2206094  | 6 | 97575196 T      | 15 | 57 C       | 0.00004089 |
| rs1612775  | 6 | 97575423 C      | 15 | 57 G       | 0.00004089 |
| rs1766531  | 6 | 97576033 C      | 15 | 57 T       | 0.00004089 |
| rs1737135  | 6 | 97577031 G      | 15 | 57 A       | 0.00004089 |
| rs6568746  | 6 | 97578265 C      | 15 | 56 T       | 0.0000815  |
| rs1206145  | 6 | 97585786 G      | 15 | 56 C       | 0.0000815  |
| rs1206176  | 6 | 97587527 A      | 15 | 56 T       | 0.0000815  |
| rs1206177  | 6 | 97590623 T      | 15 | 56 C       | 0.0000815  |
| rs1206178  | 6 | 97591680 A      | 15 | 56 G       | 0.0000815  |
| rs1206134  | 6 | 97601582 T      | 15 | 56 A       | 0.0000815  |
| rs140706   | 6 | 97603195 A      | 15 | 56 AATTGTT | 0.0000815  |
| rs1206137  | 6 | 97605268 G      | 15 | 56 A       | 0.0000815  |
| rs1206139  | 6 | 97606816 C      | 15 | 56 G       | 0.0000815  |
| rs1766513  | 6 | 97607265 G      | 15 | 56 T       | 0.0000815  |
| rs1737140  | 6 | 97607266 A      | 15 | 56 C       | 0.0000815  |
| rs1206141  | 6 | 97608206 T      | 15 | 56 G       | 0.0000815  |
| rs3061513  | 6 | 97612420 CAAAAT | 15 | 56 C       | 0.0000815  |
| rs1206124  | 6 | 97612708 G      | 15 | 56 T       | 0.0000815  |
| rs1209290  | 6 | 97613163 C      | 15 | 56 T       | 0.0000815  |
| rs1206125  | 6 | 97616717 G      | 15 | 56 A       | 0.0000815  |
| rs11317728 | 6 | 97618338 G      | 17 | 56 GT      | 0.0003692  |
| rs1206126  | 6 | 97618476 G      | 16 | 56 C       | 0.0001751  |
| rs1623061  | 6 | 97621318 T      | 15 | 56 A       | 0.0000815  |
| rs1623056  | 6 | 97621320 T      | 15 | 56 C       | 0.0000815  |
| rs3061515  | 6 | 97621860 G      | 15 | 56 GCTC    | 0.0000815  |
| rs1206129  | 6 | 97622500 A      | 14 | 56 G       | 0.00002211 |
| rs6926003  | 6 | 97624248 C      | 15 | 56 T       | 0.0000815  |
| rs1766470  | 6 | 97625034 C      | 15 | 56 T       | 0.0000815  |
| rs1014976  | 6 | 97628442 T      | 15 | 56 G       | 0.0000815  |
| rs6913262  | 6 | 97629155 C      | 15 | 56 T       | 0.0000815  |

|             |   |              |    |                |            |
|-------------|---|--------------|----|----------------|------------|
| rs1206170   | 6 | 97629381 G   | 15 | 56 C           | 0.0000815  |
| rs1206171   | 6 | 97629689 A   | 15 | 56 C           | 0.0000815  |
| rs717020    | 6 | 97630619 T   | 15 | 56 C           | 0.0000815  |
| rs1206172   | 6 | 97631143 C   | 15 | 56 T           | 0.0000815  |
| rs1209293   | 6 | 97632347 T   | 15 | 56 C           | 0.0000815  |
| rs1206174   | 6 | 97637114 T   | 14 | 54 C           | 0.00003985 |
| rs1206175   | 6 | 97639120 C   | 15 | 56 T           | 0.0000815  |
| rs1206163   | 6 | 97642227 T   | 15 | 56 C           | 0.0000815  |
| rs6931754   | 6 | 97644798 T   | 15 | 56 C           | 0.0000815  |
| rs6932480   | 6 | 97645222 G   | 15 | 56 C           | 0.0000815  |
| rs199760978 | 6 | 100330942 A  | 13 | 2 ATATATATATAT | 0.00007644 |
| 6:100330946 | 6 | 100330946 A  | 7  | 0 ATATATAT     | 0.0009566  |
| rs1998736   | 6 | 105886985 A  | 17 | 7 G            | 0.0004382  |
| rs7765899   | 6 | 105896843 T  | 17 | 7 C            | 0.0004382  |
| rs17797252  | 6 | 125681602 A  | 3  | 25 T           | 0.0009258  |
| rs17797323  | 6 | 125683552 A  | 3  | 25 G           | 0.0009258  |
| rs17740938  | 6 | 125683815 C  | 3  | 25 T           | 0.0009258  |
| rs17797377  | 6 | 125684251 G  | 3  | 25 A           | 0.0009258  |
| rs117239907 | 6 | 129086098 T  | 7  | 0 C            | 0.0008679  |
| rs139839707 | 6 | 129529703 A  | 0  | 16 AAGAAAG     | 0.0005294  |
| rs149221317 | 6 | 129529821 A  | 0  | 16 AGAAG       | 0.0005294  |
| rs9398914   | 6 | 129986453 G  | 29 | 22 C           | 0.0007063  |
| rs372889112 | 6 | 132830595 AC | 16 | 7 A            | 0.0007388  |
| 6:151367629 | 6 | 151367629 G  | 0  | 15 A           | 0.0004006  |
| 6:151367631 | 6 | 151367631 A  | 0  | 15 ATAT        | 0.0004006  |
| rs851977    | 6 | 152029608 C  | 6  | 32 T           | 0.00098    |
| rs851976    | 6 | 152030008 C  | 6  | 32 T           | 0.00098    |
| rs34053404  | 6 | 152036607 TC | 6  | 32 T           | 0.00098    |
| rs11756568  | 6 | 152042413 T  | 6  | 32 A           | 0.00098    |
| rs7772579   | 6 | 152042502 C  | 6  | 32 A           | 0.00098    |
| rs3020340   | 6 | 152043290 G  | 6  | 32 A           | 0.00098    |
| rs3020341   | 6 | 152047557 C  | 6  | 32 G           | 0.00098    |
| rs3020342   | 6 | 152047753 G  | 6  | 32 A           | 0.00098    |
| rs6923710   | 6 | 152876122 G  | 21 | 12 C           | 0.0009318  |
| rs2623960   | 6 | 152893441 T  | 20 | 10 C           | 0.0005561  |
| rs12213593  | 6 | 152896250 A  | 21 | 12 T           | 0.0009318  |
| rs1936729   | 6 | 153013061 T  | 18 | 8 C            | 0.0005897  |
| rs13211784  | 6 | 153066369 G  | 18 | 8 T            | 0.0005897  |
| rs12193114  | 6 | 155179754 G  | 21 | 12 A           | 0.0009318  |
| rs764420    | 6 | 155182564 G  | 19 | 8 A            | 0.0002919  |
| rs17085762  | 6 | 155194880 G  | 20 | 10 T           | 0.0005561  |

|             |   |             |    |         |           |
|-------------|---|-------------|----|---------|-----------|
| rs11756339  | 6 | 155203746 G | 19 | 9 C     | 0.0004395 |
| rs12200590  | 6 | 155213791 C | 20 | 11 A    | 0.0008202 |
| rs11759770  | 6 | 155216072 C | 20 | 11 T    | 0.0008202 |
| rs12215496  | 6 | 155219791 T | 20 | 11 C    | 0.0008202 |
| rs4523098   | 6 | 156109429 A | 8  | 0 T     | 0.0003016 |
| rs4642490   | 6 | 156109467 G | 8  | 0 A     | 0.0003016 |
| rs4631304   | 6 | 156114139 T | 8  | 0 C     | 0.0003016 |
| rs13203482  | 6 | 158865022 C | 9  | 1 T     | 0.0007194 |
| rs34871904  | 6 | 164419870 T | 7  | 0 C     | 0.0008679 |
| rs206731    | 6 | 164503657 A | 9  | 1 C     | 0.0007194 |
| rs34883865  | 6 | 164519315 T | 7  | 0 G     | 0.0008679 |
| rs13214170  | 6 | 164533595 A | 7  | 0 G     | 0.0008679 |
| rs77742773  | 7 | 178778 T    | 7  | 0 C     | 0.0008679 |
| rs36156024  | 7 | 299642 A    | 13 | 48 G    | 0.0005647 |
| rs36173075  | 7 | 299976 A    | 12 | 48 G    | 0.0002609 |
| rs36179424  | 7 | 300864 T    | 11 | 48 G    | 0.0001177 |
| rs36132515  | 7 | 301269 A    | 11 | 48 G    | 0.0001177 |
| rs137936691 | 7 | 301592 C    | 11 | 48 G    | 0.0001177 |
| rs145903549 | 7 | 301646 T    | 11 | 47 C    | 0.0001343 |
| rs146049438 | 7 | 302713 T    | 11 | 46 C    | 0.0002401 |
| rs148712790 | 7 | 302742 T    | 11 | 45 C    | 0.0004315 |
| rs141483653 | 7 | 302781 G    | 11 | 45 C    | 0.0004315 |
| rs36181705  | 7 | 304301 G    | 26 | 18 T    | 0.0007809 |
| rs36127047  | 7 | 304633 G    | 26 | 18 A    | 0.0007809 |
| rs142523453 | 7 | 305124 A    | 11 | 46 G    | 0.0002401 |
| rs36144408  | 7 | 305366 A    | 26 | 18 G    | 0.0007809 |
| rs149104177 | 7 | 305433 A    | 11 | 45 G    | 0.0004315 |
| rs36175942  | 7 | 307087 G    | 26 | 18 A    | 0.0007809 |
| rs36188152  | 7 | 307113 G    | 26 | 18 A    | 0.0007809 |
| rs142817657 | 7 | 308803 G    | 10 | 45 A    | 0.0001954 |
| rs147412934 | 7 | 308829 T    | 10 | 44 C    | 0.000219  |
| rs6943256   | 7 | 3294678 C   | 1  | 21 T    | 0.0002339 |
| rs6967704   | 7 | 3295384 A   | 11 | 43 T    | 0.0008678 |
| rs11982357  | 7 | 3295697 G   | 11 | 43 A    | 0.0008678 |
| rs6948159   | 7 | 3302628 C   | 11 | 43 G    | 0.0008678 |
| rs13230939  | 7 | 3303735 A   | 8  | 38 G    | 0.0005059 |
| rs10654490  | 7 | 3304547 A   | 8  | 38 AAAC | 0.0005059 |
| rs10232995  | 7 | 5129342 C   | 3  | 25 T    | 0.0009258 |
| rs1859512   | 7 | 8535486 T   | 9  | 1 C     | 0.0007194 |
| rs62448063  | 7 | 8537239 T   | 9  | 1 C     | 0.0007194 |
| rs78646483  | 7 | 8537781 G   | 9  | 1 GTTA  | 0.0007194 |

|             |   |               |    |               |           |
|-------------|---|---------------|----|---------------|-----------|
| rs17149768  | 7 | 8538351 A     | 9  | 1 T           | 0.0007194 |
| rs17404592  | 7 | 8538451 C     | 9  | 1 G           | 0.0007194 |
| rs12702770  | 7 | 8749807 A     | 13 | 47 G          | 0.0009845 |
| rs75876133  | 7 | 17262196 G    | 0  | 16 T          | 0.0005294 |
| rs143469691 | 7 | 22059039 C    | 13 | 4 T           | 0.000883  |
| rs6462091   | 7 | 28514580 C    | 9  | 41 T          | 0.0003404 |
| rs6462092   | 7 | 28514625 G    | 2  | 22 C          | 0.0009583 |
| rs12674383  | 7 | 28515071 T    | 2  | 22 A          | 0.0009583 |
| rs34388783  | 7 | 28515097 AAAG | 10 | 42 A          | 0.0006808 |
| rs9791765   | 7 | 28515392 A    | 2  | 22 C          | 0.0009583 |
| rs13242388  | 7 | 28518903 A    | 2  | 22 C          | 0.0009583 |
| rs34323713  | 7 | 28519179 G    | 2  | 22 C          | 0.0009583 |
| rs35894653  | 7 | 28519197 G    | 2  | 22 A          | 0.0009583 |
| rs114066291 | 7 | 28519652 G    | 2  | 23 C          | 0.0005167 |
| rs4722804   | 7 | 28532464 T    | 2  | 26 G          | 0.0001452 |
| rs4722806   | 7 | 28534115 A    | 2  | 24 G          | 0.0002818 |
| rs13224567  | 7 | 28539195 G    | 2  | 24 C          | 0.0002818 |
| rs12671325  | 7 | 28539563 T    | 2  | 24 A          | 0.0002818 |
| rs7807102   | 7 | 28540019 T    | 2  | 24 C          | 0.0002818 |
| rs7802212   | 7 | 28546366 T    | 2  | 24 C          | 0.0002818 |
| rs71876335  | 7 | 28550825 T    | 2  | 24 TGGTCAGGCA | 0.0002818 |
| rs12700889  | 7 | 28551585 A    | 2  | 22 G          | 0.0009583 |
| rs71555746  | 7 | 28553169 C    | 2  | 22 CTTATA     | 0.0009583 |
| rs10046532  | 7 | 30971322 T    | 1  | 19 A          | 0.0008417 |
| rs28808367  | 7 | 30980546 C    | 2  | 22 T          | 0.0009583 |
| rs6462239   | 7 | 30981435 G    | 2  | 22 A          | 0.0009583 |
| rs80161983  | 7 | 30982439 G    | 2  | 22 A          | 0.0009583 |
| rs57439212  | 7 | 30983904 G    | 2  | 22 T          | 0.0009583 |
| rs4723028   | 7 | 30985232 G    | 2  | 22 C          | 0.0009583 |
| rs10265514  | 7 | 30985769 A    | 2  | 22 G          | 0.0009583 |
| rs4000207   | 7 | 30988163 G    | 2  | 23 A          | 0.0005167 |
| rs76778316  | 7 | 30990363 A    | 0  | 17 G          | 0.0002606 |
| rs4723034   | 7 | 30994911 G    | 2  | 22 T          | 0.0009583 |
| rs73305796  | 7 | 30997063 A    | 2  | 22 G          | 0.0009583 |
| rs1894850   | 7 | 30997245 A    | 2  | 22 G          | 0.0009583 |
| rs10271796  | 7 | 30998184 T    | 2  | 22 C          | 0.0009583 |
| rs112395084 | 7 | 30998810 A    | 2  | 22 G          | 0.0009583 |
| rs4723036   | 7 | 30999116 T    | 2  | 22 C          | 0.0009583 |
| rs75702393  | 7 | 37401837 AT   | 21 | 12 A          | 0.0009318 |
| 7:37401838  | 7 | 37401838 ATAT | 21 | 12 A          | 0.0009318 |
| 7:38430592  | 7 | 38430592 G    | 1  | 23 GA         | 0.0001244 |

|             |   |             |    |                         |            |
|-------------|---|-------------|----|-------------------------|------------|
| rs2329396   | 7 | 39534540 A  | 33 | 28 G                    | 0.0009909  |
| rs7797586   | 7 | 39539525 A  | 36 | 32 T                    | 0.0006397  |
| rs7778850   | 7 | 39539715 G  | 36 | 32 C                    | 0.0006397  |
| rs55813588  | 7 | 39540119 A  | 36 | 32 AG                   | 0.0006397  |
| rs2278365   | 7 | 39540611 T  | 36 | 32 C                    | 0.0006397  |
| rs139669364 | 7 | 42438916 GA | 9  | 0 G                     | 0.0001034  |
| rs76889858  | 7 | 46919281 T  | 7  | 0 C                     | 0.0008679  |
| rs148068890 | 7 | 46956216 A  | 7  | 0 T                     | 0.0008679  |
| rs117127634 | 7 | 46965364 T  | 8  | 0 C                     | 0.0003016  |
| rs71545975  | 7 | 47144505 A  | 10 | 2 G                     | 0.0008882  |
| rs73118262  | 7 | 52667755 G  | 11 | 44 A                    | 0.0007768  |
| rs35286387  | 7 | 52757969 T  | 10 | 42 A                    | 0.0006808  |
| rs34904869  | 7 | 52760201 T  | 10 | 42 G                    | 0.0006808  |
| rs1442236   | 7 | 52761379 C  | 10 | 42 T                    | 0.0006808  |
| rs845552    | 7 | 55245507 G  | 16 | 54 A                    | 0.0003907  |
| rs845555    | 7 | 55247334 T  | 16 | 53 C                    | 0.0006806  |
| rs12672565  | 7 | 55656562 G  | 32 | 26 A                    | 0.0008799  |
| rs111322735 | 7 | 61786170 A  | 5  | 34 T                    | 0.0001138  |
| rs73125943  | 7 | 62070077 A  | 7  | 0 G                     | 0.0008679  |
| 7:64580618  | 7 | 64580618 G  | 11 | 2 A                     | 0.0003416  |
| rs10551417  | 7 | 71563744 G  | 15 | 6 GGC                   | 0.000384   |
| rs200136831 | 7 | 75372323 T  | 13 | 47 TA                   | 0.0005538  |
| rs200981755 | 7 | 79359478 T  | 9  | 44 TAAATATTTAAAATATTGAT | 0.0000882  |
| rs62468686  | 7 | 81063239 T  | 13 | 4 C                     | 0.000883   |
| rs2079888   | 7 | 84877586 A  | 29 | 22 T                    | 0.0007063  |
| rs13247006  | 7 | 84883983 G  | 29 | 20 T                    | 0.0003112  |
| rs12674373  | 7 | 84884322 C  | 32 | 23 T                    | 0.000199   |
| rs1569114   | 7 | 85003763 A  | 4  | 31 C                    | 0.0001398  |
| rs374778279 | 7 | 85006798 A  | 6  | 35 AAT                  | 0.0002556  |
| rs2435272   | 7 | 85007066 T  | 11 | 50 G                    | 0.00003137 |
| rs2463468   | 7 | 85009349 T  | 11 | 50 C                    | 0.00003137 |
| rs2030624   | 7 | 85013958 C  | 11 | 50 T                    | 0.00003137 |
| rs2463475   | 7 | 85016000 T  | 11 | 50 C                    | 0.00003137 |
| rs2462058   | 7 | 85019297 T  | 11 | 50 A                    | 0.00003137 |
| rs1403785   | 7 | 85021953 A  | 11 | 50 G                    | 0.00003137 |
| rs2462057   | 7 | 85024037 T  | 11 | 50 C                    | 0.00003137 |
| rs1960550   | 7 | 85024643 T  | 11 | 50 C                    | 0.00003137 |
| rs2077770   | 7 | 85026097 T  | 11 | 50 A                    | 0.00003137 |
| rs2463478   | 7 | 85030592 G  | 11 | 48 T                    | 0.0001177  |
| rs1583081   | 7 | 85034227 T  | 11 | 50 G                    | 0.00003137 |
| rs2463480   | 7 | 85036389 T  | 11 | 50 C                    | 0.00003137 |

|             |   |                        |    |       |            |
|-------------|---|------------------------|----|-------|------------|
| rs2435264   | 7 | 85036405 T             | 11 | 50 A  | 0.00003137 |
| rs2463481   | 7 | 85037374 G             | 10 | 44 A  | 0.000219   |
| rs148525782 | 7 | 85045118 A             | 11 | 50 AT | 0.00003137 |
| rs112461735 | 7 | 85045121 C             | 11 | 50 A  | 0.00003137 |
| rs7794512   | 7 | 85045881 A             | 10 | 44 G  | 0.000219   |
| rs34140074  | 7 | 85054102 A             | 19 | 58 AT | 0.0006983  |
| rs1829902   | 7 | 85057001 C             | 19 | 58 G  | 0.0006983  |
| rs35288706  | 7 | 85058425 GA            | 19 | 58 G  | 0.0006983  |
| rs34970164  | 7 | 85058967 GA            | 19 | 58 G  | 0.0006983  |
| rs12704128  | 7 | 85059181 A             | 19 | 58 G  | 0.0006983  |
| rs13237273  | 7 | 85063736 C             | 19 | 58 T  | 0.0006983  |
| rs10952847  | 7 | 85064804 C             | 19 | 58 T  | 0.0006983  |
| rs17159934  | 7 | 85070736 A             | 18 | 58 C  | 0.000347   |
| rs17159935  | 7 | 85070949 A             | 18 | 58 C  | 0.000347   |
| rs1560315   | 7 | 85075150 G             | 18 | 58 C  | 0.000347   |
| rs10499888  | 7 | 85078623 A             | 19 | 58 G  | 0.0006983  |
| rs73193990  | 7 | 85079015 A             | 19 | 58 G  | 0.0006983  |
| rs35523949  | 7 | 85085202 G             | 19 | 58 A  | 0.0006983  |
| rs143204611 | 7 | 85086268 TTTAATTATGGTC | 18 | 58 T  | 0.000347   |
| rs35295520  | 7 | 85091841 G             | 18 | 58 GA | 0.000347   |
| rs2462049   | 7 | 85099898 G             | 15 | 52 T  | 0.0006042  |
| rs78388085  | 7 | 86482580 C             | 0  | 15 T  | 0.0005628  |
| rs10226491  | 7 | 86483501 C             | 0  | 15 T  | 0.0005628  |
| rs10269943  | 7 | 86483503 A             | 0  | 15 G  | 0.0005628  |
| rs58496134  | 7 | 86483847 TAATAAA       | 0  | 15 T  | 0.0005628  |
| rs60438843  | 7 | 86484166 C             | 0  | 15 G  | 0.0005628  |
| rs7792069   | 7 | 86485557 C             | 0  | 15 G  | 0.0005628  |
| rs10263372  | 7 | 86486846 G             | 0  | 15 C  | 0.0005628  |
| rs73382349  | 7 | 86489205 A             | 0  | 15 G  | 0.0005628  |
| rs7808623   | 7 | 86490154 G             | 0  | 15 T  | 0.0005628  |
| rs17161067  | 7 | 86490264 C             | 0  | 15 T  | 0.0005628  |
| rs28479466  | 7 | 86491021 T             | 0  | 15 A  | 0.0005628  |
| rs28755802  | 7 | 86491029 A             | 0  | 15 G  | 0.0005628  |
| rs7781782   | 7 | 86506594 G             | 0  | 15 A  | 0.0005628  |
| rs6972489   | 7 | 86523164 A             | 0  | 15 G  | 0.0005628  |
| rs28405414  | 7 | 86525772 A             | 0  | 15 G  | 0.0005628  |
| rs17161098  | 7 | 86531065 A             | 0  | 15 G  | 0.0005628  |
| rs148521890 | 7 | 86531485 GTTGT         | 0  | 15 G  | 0.0005628  |
| rs35895874  | 7 | 86542455 T             | 0  | 15 C  | 0.0005628  |
| rs1029367   | 7 | 86544248 T             | 0  | 15 C  | 0.0005628  |
| rs28410495  | 7 | 86552503 A             | 0  | 15 G  | 0.0005628  |

|             |   |                 |    |         |            |
|-------------|---|-----------------|----|---------|------------|
| rs139183478 | 7 | 86554071 T      | 0  | 16 TG   | 0.0005294  |
| rs145574697 | 7 | 86562259 A      | 0  | 15 ATTT | 0.0005628  |
| rs10216150  | 7 | 86562755 G      | 0  | 15 A    | 0.0005628  |
| rs10215436  | 7 | 86562756 A      | 0  | 15 C    | 0.0005628  |
| rs12111888  | 7 | 86581391 G      | 0  | 15 A    | 0.0005628  |
| rs28362761  | 7 | 86583044 T      | 0  | 15 A    | 0.0005628  |
| rs17161118  | 7 | 86586561 T      | 0  | 15 C    | 0.0005628  |
| rs10282116  | 7 | 94566679 T      | 14 | 50 C    | 0.0005849  |
| rs10246268  | 7 | 94567965 A      | 14 | 51 T    | 0.000328   |
| rs6949844   | 7 | 94583279 T      | 15 | 51 A    | 0.0006974  |
| rs854717    | 7 | 94593140 A      | 14 | 51 G    | 0.000328   |
| rs11981513  | 7 | 94648239 A      | 37 | 31 G    | 0.0001688  |
| rs7783267   | 7 | 101330957 T     | 2  | 28 A    | 0.00003728 |
| rs17368789  | 7 | 106210885 G     | 6  | 33 T    | 0.0009098  |
| rs13231035  | 7 | 113053088 G     | 13 | 54 A    | 0.0000357  |
| rs425956    | 7 | 114719858 C     | 8  | 38 T    | 0.0005059  |
| rs73217748  | 7 | 122738762 G     | 22 | 13 A    | 0.0006749  |
| rs17149636  | 7 | 126018952 G     | 3  | 25 A    | 0.0009258  |
| rs10248006  | 7 | 126034791 G     | 26 | 16 A    | 0.0002858  |
| rs887025    | 7 | 126040117 C     | 26 | 15 T    | 0.0001216  |
| rs887026    | 7 | 126040259 A     | 26 | 15 T    | 0.0001216  |
| rs4731312   | 7 | 126041074 C     | 16 | 5 A     | 0.0001588  |
| rs12113410  | 7 | 126044778 A     | 16 | 5 G     | 0.0001588  |
| rs756969    | 7 | 126051716 G     | 3  | 25 T    | 0.0009258  |
| rs12531943  | 7 | 126055409 C     | 34 | 26 T    | 0.0001338  |
| rs2028058   | 7 | 126059071 A     | 34 | 25 G    | 0.00006745 |
| rs2106197   | 7 | 126060738 C     | 33 | 26 T    | 0.0002784  |
| rs1016973   | 7 | 126063696 G     | 26 | 17 A    | 0.0003852  |
| rs34056637  | 7 | 126064156 GTATC | 26 | 17 G    | 0.0003852  |
| rs56171722  | 7 | 126064759 CT    | 26 | 17 C    | 0.0003852  |
| rs7796433   | 7 | 136074061 A     | 28 | 20 G    | 0.0005398  |
| rs7796512   | 7 | 136074356 C     | 28 | 20 A    | 0.0005398  |
| rs10264196  | 7 | 136076820 G     | 28 | 20 A    | 0.0005398  |
| rs12707301  | 7 | 136078014 T     | 28 | 20 C    | 0.0005398  |
| rs12707302  | 7 | 136086103 G     | 28 | 20 A    | 0.0005398  |
| rs368726252 | 7 | 136099934 T     | 28 | 18 A    | 0.000203   |
| rs35567576  | 7 | 136107895 C     | 28 | 20 CACT | 0.0005398  |
| rs2349736   | 7 | 136108549 A     | 28 | 20 T    | 0.0005398  |
| rs17168667  | 7 | 136111845 G     | 9  | 1 T     | 0.0007194  |
| 7:136115344 | 7 | 136115344 C     | 7  | 0 CAT   | 0.0008679  |
| 7:136195265 | 7 | 136195265 T     | 7  | 0 TAAG  | 0.0008679  |



|             |   |               |    |       |             |
|-------------|---|---------------|----|-------|-------------|
| rs188902097 | 7 | 136300945 T   | 7  | 0 A   | 0.0008679   |
| rs7801517   | 7 | 136464049 A   | 26 | 17 G  | 0.0005997   |
| rs28393971  | 7 | 137992022 A   | 13 | 3 T   | 0.0002093   |
| rs10261424  | 7 | 138556831 T   | 11 | 44 A  | 0.0007768   |
| rs10261559  | 7 | 138556954 C   | 11 | 44 A  | 0.0007768   |
| rs10954634  | 7 | 138557068 T   | 7  | 42 C  | 0.00002668  |
| rs34717241  | 7 | 138560840 C   | 11 | 44 T  | 0.0007768   |
| rs10249247  | 7 | 138561175 G   | 11 | 44 C  | 0.0007768   |
| rs10278730  | 7 | 138561260 G   | 11 | 44 A  | 0.0007768   |
| rs10252467  | 7 | 138561417 A   | 11 | 44 C  | 0.0007768   |
| rs12114019  | 7 | 138565405 T   | 10 | 44 G  | 0.000219    |
| rs143461168 | 7 | 138588606 CGT | 4  | 28 C  | 0.0007865   |
| rs10278421  | 7 | 138588610 T   | 4  | 27 C  | 0.000811    |
| rs117919318 | 7 | 140083539 T   | 14 | 4 C   | 0.0003939   |
| rs62483146  | 7 | 144225556 A   | 14 | 5 T   | 0.0008508   |
| rs17798068  | 7 | 144877432 T   | 23 | 12 C  | 0.0002434   |
| rs13234300  | 7 | 144882368 A   | 22 | 6 G   | 0.00000161  |
| rs12386575  | 7 | 144882592 G   | 26 | 13 T  | 0.00003493  |
| rs10228815  | 7 | 144882889 G   | 21 | 6 T   | 0.000004184 |
| rs35064577  | 7 | 144883441 A   | 25 | 13 AC | 0.00007409  |
| rs66810244  | 7 | 144884238 G   | 25 | 12 C  | 0.00002059  |
| rs71528967  | 7 | 144884334 A   | 21 | 6 G   | 0.000004184 |
| rs34397230  | 7 | 144884596 C   | 25 | 12 T  | 0.00002834  |
| rs6956030   | 7 | 144884884 G   | 25 | 12 A  | 0.00002834  |
| rs2371838   | 7 | 144885248 C   | 25 | 12 G  | 0.00002834  |
| rs2888169   | 7 | 144885398 A   | 25 | 12 G  | 0.00002834  |
| rs2371839   | 7 | 144885447 A   | 25 | 12 G  | 0.00002834  |
| rs4272286   | 7 | 144885533 C   | 25 | 12 G  | 0.00002834  |
| rs4484599   | 7 | 144885638 A   | 25 | 12 C  | 0.00002834  |
| rs56046712  | 7 | 144885654 T   | 25 | 12 C  | 0.00002834  |
| rs13240871  | 7 | 144885939 G   | 25 | 12 A  | 0.00002834  |
| rs10232491  | 7 | 144885995 T   | 25 | 12 G  | 0.00002834  |
| rs10262936  | 7 | 144886172 T   | 25 | 12 C  | 0.00002834  |
| rs10263180  | 7 | 144886365 T   | 25 | 12 C  | 0.00002834  |
| rs10263307  | 7 | 144886410 T   | 25 | 11 C  | 0.00001926  |
| rs10233496  | 7 | 144886823 A   | 25 | 12 G  | 0.00002834  |
| rs35551476  | 7 | 144887688 CA  | 25 | 12 C  | 0.00002834  |
| rs10237587  | 7 | 144887701 A   | 25 | 12 G  | 0.00002834  |
| rs10237736  | 7 | 144887821 A   | 25 | 12 G  | 0.00002834  |
| rs10230667  | 7 | 144887987 C   | 25 | 12 T  | 0.00002834  |
| rs10228165  | 7 | 144888530 G   | 25 | 12 A  | 0.00002834  |

|             |   |             |    |      |             |
|-------------|---|-------------|----|------|-------------|
| rs7799776   | 7 | 144888698 T | 21 | 6 C  | 0.000004184 |
| rs7782759   | 7 | 144888944 G | 25 | 12 A | 0.00002834  |
| rs7786860   | 7 | 144889158 A | 25 | 12 T | 0.00002834  |
| rs7786717   | 7 | 144889286 T | 25 | 12 A | 0.00002834  |
| rs12703655  | 7 | 144889357 C | 25 | 12 T | 0.00002834  |
| rs12703656  | 7 | 144889407 T | 25 | 12 C | 0.00002834  |
| rs12703657  | 7 | 144889435 C | 25 | 12 T | 0.00002834  |
| rs12703658  | 7 | 144889457 A | 25 | 12 G | 0.00002834  |
| rs12703659  | 7 | 144889468 T | 25 | 12 C | 0.00002834  |
| rs12703660  | 7 | 144889611 G | 25 | 12 C | 0.00002834  |
| rs12703661  | 7 | 144889622 C | 25 | 12 G | 0.00002834  |
| rs13228764  | 7 | 144889646 G | 25 | 12 A | 0.00006375  |
| rs13228765  | 7 | 144889652 G | 25 | 12 A | 0.00006375  |
| rs12532810  | 7 | 144890664 G | 25 | 12 A | 0.00002834  |
| rs12535162  | 7 | 144890750 C | 25 | 12 G | 0.00002834  |
| rs12533418  | 7 | 144890960 C | 25 | 12 T | 0.00002834  |
| rs12533931  | 7 | 144890997 A | 25 | 12 T | 0.00002834  |
| rs12533395  | 7 | 144891006 C | 25 | 12 A | 0.00002834  |
| rs12535710  | 7 | 144891096 A | 25 | 12 G | 0.00002834  |
| rs28465582  | 7 | 144891444 A | 25 | 12 G | 0.00002834  |
| rs28718081  | 7 | 144891453 C | 25 | 12 T | 0.00002834  |
| rs13221722  | 7 | 144891618 T | 25 | 12 G | 0.00002834  |
| rs12534658  | 7 | 144891996 A | 25 | 12 T | 0.00002834  |
| rs12531488  | 7 | 144892086 T | 25 | 12 C | 0.00002834  |
| rs34987711  | 7 | 144892400 G | 25 | 12 A | 0.00002834  |
| rs7788595   | 7 | 144893242 A | 21 | 6 C  | 0.000004184 |
| rs34694182  | 7 | 144893767 A | 22 | 9 AT | 0.00004313  |
| rs2371843   | 7 | 144895554 A | 19 | 5 G  | 0.00001146  |
| rs2371844   | 7 | 144895575 A | 19 | 5 G  | 0.00001146  |
| rs12703663  | 7 | 144895979 G | 19 | 5 A  | 0.00001146  |
| rs13247774  | 7 | 144896721 A | 19 | 5 G  | 0.00001146  |
| rs71528968  | 7 | 144901501 T | 21 | 8 C  | 0.00003188  |
| rs150195176 | 7 | 144911246 T | 19 | 5 C  | 0.00001146  |
| rs12703667  | 7 | 144915712 T | 19 | 6 C  | 0.00002708  |
| rs139336131 | 7 | 144935515 A | 13 | 2 G  | 0.00006438  |
| rs12703668  | 7 | 144938998 C | 18 | 5 T  | 0.00002769  |
| rs66706284  | 7 | 144946452 A | 19 | 5 G  | 0.00001146  |
| rs73170827  | 7 | 144947604 T | 16 | 3 A  | 0.0000134   |
| rs34223395  | 7 | 144950375 T | 19 | 5 C  | 0.00001146  |
| rs2888208   | 7 | 144953486 G | 19 | 8 T  | 0.0002919   |
| rs12703672  | 7 | 144965537 C | 19 | 6 A  | 0.00002708  |

|             |   |                         |    |       |           |
|-------------|---|-------------------------|----|-------|-----------|
| 7:151092596 | 7 | 151092596 CGG           | 9  | 0 C   | 0.0001034 |
| rs143970329 | 7 | 153517490 G             | 17 | 6 T   | 0.0002592 |
| rs11451890  | 7 | 153520700 G             | 23 | 14 GT | 0.0007414 |
| rs4725514   | 7 | 153520711 C             | 23 | 14 A  | 0.0007414 |
| rs2622260   | 7 | 153521183 A             | 24 | 14 G  | 0.0003806 |
| rs6464368   | 7 | 153521224 G             | 24 | 14 A  | 0.0003806 |
| rs7795045   | 7 | 153521738 T             | 24 | 14 C  | 0.0003806 |
| rs150245240 | 7 | 153994161 T             | 7  | 0 TG  | 0.0006731 |
| rs13223976  | 7 | 154976046 C             | 18 | 57 T  | 0.0006427 |
| rs7794634   | 7 | 154980152 T             | 18 | 57 C  | 0.0006427 |
| rs10279840  | 7 | 154980616 A             | 18 | 57 C  | 0.0006427 |
| 7:155817937 | 7 | 155817937 TGTGTGTGTGGG1 | 11 | 2 T   | 0.0005111 |
| rs55935121  | 7 | 156687241 G             | 1  | 20 A  | 0.0004403 |
| rs10234398  | 7 | 156699525 A             | 2  | 22 G  | 0.0009583 |
| rs10949613  | 7 | 156715941 A             | 2  | 22 G  | 0.0009583 |
| rs11772112  | 7 | 156727939 C             | 1  | 21 A  | 0.0002339 |
| rs12697999  | 7 | 156737675 A             | 14 | 50 G  | 0.0005849 |
| rs2365991   | 7 | 156740311 T             | 16 | 54 C  | 0.0003907 |
| rs10273308  | 7 | 156749283 G             | 14 | 50 A  | 0.0005849 |
| rs7458640   | 7 | 156750236 G             | 14 | 50 A  | 0.0005849 |
| rs887614    | 7 | 156750695 G             | 14 | 50 A  | 0.0005849 |
| rs887613    | 7 | 156750843 G             | 14 | 50 A  | 0.0005849 |
| rs887612    | 7 | 156750945 C             | 14 | 50 T  | 0.0005849 |
| rs887611    | 7 | 156751230 G             | 14 | 50 A  | 0.0005849 |
| rs2365992   | 7 | 156751365 T             | 14 | 50 A  | 0.0005849 |
| rs887610    | 7 | 156751377 T             | 14 | 50 C  | 0.0005849 |
| rs10234725  | 7 | 156751997 C             | 14 | 50 T  | 0.0005849 |
| rs10263247  | 7 | 156752018 G             | 14 | 50 A  | 0.0005849 |
| rs10253363  | 7 | 156752231 T             | 14 | 50 C  | 0.0005849 |
| rs6943879   | 7 | 156760485 A             | 14 | 50 G  | 0.0005849 |
| rs10272415  | 7 | 156761137 C             | 14 | 50 T  | 0.0005849 |
| rs9969350   | 7 | 156761751 C             | 14 | 51 T  | 0.000328  |
| rs2302445   | 7 | 156761818 G             | 14 | 50 A  | 0.0005849 |
| rs2302443   | 7 | 156762224 G             | 14 | 50 C  | 0.0005849 |
| rs12919     | 7 | 156762248 G             | 14 | 50 A  | 0.0005849 |
| rs3087905   | 7 | 156762446 G             | 14 | 50 T  | 0.0005849 |
| rs12698009  | 7 | 156763188 T             | 14 | 50 C  | 0.0005849 |
| rs12698010  | 7 | 156763248 C             | 14 | 50 T  | 0.0005849 |
| rs4434512   | 7 | 156763550 A             | 14 | 50 G  | 0.0005849 |
| rs4326276   | 7 | 156763588 C             | 14 | 50 T  | 0.0005849 |
| rs4434513   | 7 | 156763589 A             | 14 | 50 T  | 0.0005849 |

|             |   |                         |    |        |           |
|-------------|---|-------------------------|----|--------|-----------|
| rs5888698   | 7 | 156763602 C             | 14 | 50 CT  | 0.0005849 |
| rs10260387  | 7 | 156764039 T             | 14 | 50 C   | 0.0005849 |
| rs10260499  | 7 | 156764072 T             | 14 | 50 C   | 0.0005849 |
| rs35889324  | 7 | 156764269 T             | 14 | 50 TG  | 0.0005849 |
| rs34351910  | 7 | 156764279 A             | 14 | 50 G   | 0.0005849 |
| rs6952436   | 7 | 156764431 T             | 14 | 50 G   | 0.0005849 |
| rs3800868   | 7 | 156764766 A             | 14 | 50 C   | 0.0005849 |
| rs3800867   | 7 | 156764887 G             | 14 | 50 A   | 0.0005849 |
| rs3823623   | 7 | 156764972 G             | 14 | 50 A   | 0.0005849 |
| rs7803794   | 7 | 156765043 C             | 14 | 50 A   | 0.0005849 |
| rs11321727  | 7 | 156765156 GT            | 14 | 50 G   | 0.0005849 |
| rs7786691   | 7 | 156765243 A             | 14 | 50 G   | 0.0005849 |
| rs13242102  | 7 | 156765455 C             | 14 | 50 T   | 0.0005849 |
| rs10672171  | 7 | 156765797 A             | 14 | 50 ATC | 0.0005849 |
| rs7808719   | 7 | 156765920 C             | 14 | 50 T   | 0.0005849 |
| rs9647658   | 7 | 156766227 T             | 14 | 50 C   | 0.0005581 |
| rs9647673   | 7 | 156766493 T             | 14 | 50 G   | 0.0005849 |
| rs10266217  | 7 | 156766511 A             | 14 | 50 G   | 0.0005849 |
| rs10251364  | 7 | 156766726 C             | 14 | 50 G   | 0.0005849 |
| rs7796704   | 7 | 156767075 A             | 14 | 50 C   | 0.0005849 |
| rs7777199   | 7 | 156767147 G             | 14 | 50 A   | 0.0005849 |
| rs7777336   | 7 | 156767197 G             | 14 | 50 A   | 0.0005849 |
| rs7777497   | 7 | 156767337 G             | 14 | 50 C   | 0.0005849 |
| rs12538789  | 7 | 156767585 A             | 14 | 50 G   | 0.0005849 |
| rs12530723  | 7 | 156767612 G             | 14 | 50 A   | 0.0005849 |
| rs34559388  | 7 | 156768398 C             | 14 | 50 CTG | 0.0005849 |
| rs7806063   | 7 | 156768424 T             | 14 | 50 C   | 0.0005849 |
| rs7786986   | 7 | 156768943 G             | 14 | 50 A   | 0.0005849 |
| rs71189970  | 7 | 156769252 TCGTGATCCACCC | 15 | 51 T   | 0.0006974 |
| rs62492706  | 7 | 156769314 G             | 15 | 51 A   | 0.0006974 |
| rs34141534  | 7 | 156769534 TA            | 16 | 53 T   | 0.0005124 |
| rs9770440   | 7 | 156770033 C             | 14 | 50 T   | 0.0005849 |
| rs10237164  | 7 | 156770281 G             | 14 | 52 A   | 0.0001845 |
| rs10223955  | 7 | 156770396 A             | 14 | 50 G   | 0.0005849 |
| rs10227139  | 7 | 156770436 T             | 14 | 50 C   | 0.0005849 |
| rs7785038   | 7 | 156771174 T             | 14 | 50 C   | 0.0005849 |
| rs7797591   | 7 | 156771205 G             | 14 | 50 C   | 0.0005849 |
| rs11509859  | 7 | 156773156 G             | 14 | 50 A   | 0.0005849 |
| rs374002060 | 7 | 156775625 CTG           | 14 | 50 C   | 0.0005849 |
| rs66473256  | 7 | 156776519 TATA          | 13 | 50 T   | 0.0004864 |
| rs71189975  | 7 | 156776573 CTG           | 14 | 50 C   | 0.0009959 |

|             |   |                |    |         |           |
|-------------|---|----------------|----|---------|-----------|
| rs72384323  | 7 | 158466979 A    | 20 | 12 AATT | 0.0005792 |
| rs11769858  | 7 | 158501492 T    | 25 | 17 C    | 0.0006387 |
| rs113802881 | 7 | 158505363 A    | 24 | 16 G    | 0.0009443 |
| rs113348912 | 8 | 2573525 TTCTTG | 5  | 34 T    | 0.0001138 |
| rs5889044   | 8 | 4377442 AGT    | 26 | 18 A    | 0.0007809 |
| rs1983474   | 8 | 4403586 A      | 20 | 11 C    | 0.0008202 |
| rs2725032   | 8 | 4441569 T      | 33 | 26 C    | 0.0002784 |
| rs2617076   | 8 | 4445174 A      | 33 | 28 C    | 0.0009909 |
| rs2724991   | 8 | 4445298 C      | 33 | 26 G    | 0.0002784 |
| rs2724988   | 8 | 4445638 G      | 33 | 28 T    | 0.0009909 |
| rs2617080   | 8 | 4446598 A      | 32 | 25 G    | 0.0004454 |
| rs11785293  | 8 | 6435943 T      | 8  | 0 C     | 0.0003016 |
| rs2945254   | 8 | 8093240 T      | 1  | 19 G    | 0.0008417 |
| 8:9113931   | 8 | 9113931 C      | 1  | 21 T    | 0.000538  |
| rs17601783  | 8 | 14756101 C     | 16 | 7 G     | 0.0009539 |
| rs10100097  | 8 | 14761792 G     | 16 | 7 A     | 0.0009539 |
| rs1351413   | 8 | 14766679 G     | 18 | 9 A     | 0.0009279 |
| rs150787829 | 8 | 15271944 G     | 9  | 1 A     | 0.0007194 |
| rs62504242  | 8 | 16738575 G     | 1  | 20 A    | 0.0004403 |
| rs59765184  | 8 | 18042251 A     | 3  | 25 T    | 0.0009258 |
| rs62499972  | 8 | 20129828 A     | 1  | 20 G    | 0.0004403 |
| rs62499973  | 8 | 20131277 G     | 1  | 19 C    | 0.0008417 |
| rs62499974  | 8 | 20132142 T     | 1  | 20 C    | 0.0004403 |
| rs11985274  | 8 | 20132201 A     | 1  | 20 T    | 0.0004403 |
| rs11995187  | 8 | 20132391 T     | 1  | 20 C    | 0.0004403 |
| rs62499975  | 8 | 20132529 T     | 1  | 20 C    | 0.0004403 |
| rs62499976  | 8 | 20132828 G     | 0  | 20 A    | 0.0000355 |
| rs111519245 | 8 | 20132873 A     | 1  | 20 G    | 0.0004893 |
| rs57092179  | 8 | 20133227 T     | 1  | 20 C    | 0.0004403 |
| rs60828034  | 8 | 20133304 G     | 1  | 20 T    | 0.0004403 |
| rs60124846  | 8 | 20133306 A     | 1  | 20 C    | 0.0004403 |
| rs62499980  | 8 | 20133714 T     | 1  | 20 C    | 0.0004403 |
| rs62499981  | 8 | 20133780 C     | 0  | 19 G    | 0.0000703 |
| rs62499982  | 8 | 20134176 A     | 1  | 20 G    | 0.0004403 |
| rs763573    | 8 | 22803050 A     | 38 | 35 C    | 0.0006427 |
| rs17334323  | 8 | 26688826 A     | 34 | 27 G    | 0.0002666 |
| rs495495    | 8 | 26698168 T     | 10 | 44 A    | 0.000219  |
| rs499042    | 8 | 26698515 C     | 10 | 44 A    | 0.000219  |
| rs556793    | 8 | 26699067 C     | 16 | 53 T    | 0.0006806 |
| rs3102087   | 8 | 26699937 A     | 16 | 53 C    | 0.0006806 |
| rs2036107   | 8 | 26701444 G     | 10 | 44 A    | 0.000219  |

|             |   |             |    |                  |            |
|-------------|---|-------------|----|------------------|------------|
| rs498194    | 8 | 26703221 C  | 9  | 41 T             | 0.0003404  |
| rs523816    | 8 | 26703750 G  | 10 | 44 T             | 0.000219   |
| rs476631    | 8 | 26706459 C  | 9  | 41 T             | 0.0003404  |
| rs539144    | 8 | 26706905 A  | 9  | 40 G             | 0.000591   |
| rs520180    | 8 | 26709922 G  | 9  | 41 A             | 0.0003404  |
| rs512131    | 8 | 26710792 A  | 9  | 41 T             | 0.0003404  |
| rs522315    | 8 | 26710975 C  | 9  | 41 A             | 0.0003404  |
| rs497883    | 8 | 26712895 C  | 8  | 41 T             | 0.0002447  |
| rs7008686   | 8 | 28098720 G  | 13 | 47 A             | 0.0009845  |
| rs10088613  | 8 | 38808612 A  | 7  | 35 G             | 0.0007198  |
| rs76242682  | 8 | 38820921 T  | 1  | 19 A             | 0.0008417  |
| rs62504408  | 8 | 38821130 A  | 1  | 19 G             | 0.0008417  |
| rs77574620  | 8 | 38822034 A  | 1  | 19 G             | 0.0008417  |
| rs59814883  | 8 | 38908019 A  | 32 | 28 G             | 0.0008859  |
| rs4617119   | 8 | 38937114 A  | 30 | 21 T             | 0.0002823  |
| rs11419069  | 8 | 38953596 TA | 30 | 23 T             | 0.0007875  |
| rs61709546  | 8 | 42712987 C  | 12 | 1 G              | 0.00003491 |
| rs75524513  | 8 | 42823912 A  | 7  | 0 G              | 0.0008679  |
| rs72647289  | 8 | 42964349 T  | 12 | 1 C              | 0.00003491 |
| rs59037494  | 8 | 42997744 T  | 12 | 1 C              | 0.00003491 |
| rs190317160 | 8 | 43274690 T  | 10 | 2 C              | 0.0008882  |
| rs148996977 | 8 | 55420141 A  | 32 | 31 ACTTTCTTTCTTG | 0.0007289  |
| rs117786334 | 8 | 55930236 T  | 7  | 0 C              | 0.0008679  |
| rs74848436  | 8 | 55983773 T  | 7  | 0 C              | 0.0008679  |
| rs11783005  | 8 | 56116482 T  | 24 | 14 C             | 0.0003806  |
| rs112209050 | 8 | 56116719 G  | 24 | 14 GCCAACATAC    | 0.0003806  |
| rs56081101  | 8 | 56407009 T  | 9  | 1 C              | 0.0007194  |
| rs62516880  | 8 | 56789408 T  | 10 | 1 C              | 0.0002681  |
| rs11996440  | 8 | 56789956 T  | 10 | 1 C              | 0.0002681  |
| rs74464209  | 8 | 56792994 G  | 10 | 1 C              | 0.0002681  |
| rs62507588  | 8 | 62807013 T  | 7  | 0 C              | 0.0008679  |
| rs10957390  | 8 | 68457397 G  | 20 | 11 A             | 0.0008202  |
| rs4737239   | 8 | 68460852 A  | 21 | 11 G             | 0.0003953  |
| rs2380415   | 8 | 68462201 T  | 20 | 11 C             | 0.0008202  |
| rs2380416   | 8 | 68462304 A  | 20 | 11 G             | 0.0008202  |
| rs2380417   | 8 | 68462501 G  | 20 | 11 C             | 0.0008202  |
| rs11785565  | 8 | 68462679 T  | 21 | 11 C             | 0.0003953  |
| rs924742    | 8 | 68464647 A  | 22 | 12 G             | 0.000477   |
| rs28416049  | 8 | 68975590 C  | 11 | 2 T              | 0.0004434  |
| rs5009543   | 8 | 69883776 T  | 28 | 19 A             | 0.0002695  |
| rs6993007   | 8 | 72705499 C  | 16 | 7 T              | 0.0009539  |

|             |   |                |    |       |            |
|-------------|---|----------------|----|-------|------------|
| rs62518663  | 8 | 72723754 C     | 23 | 13 T  | 0.0003278  |
| rs10108922  | 8 | 72724089 C     | 23 | 13 T  | 0.0003278  |
| rs28460598  | 8 | 72729815 T     | 23 | 13 C  | 0.0003278  |
| rs61670134  | 8 | 72739815 C     | 23 | 13 G  | 0.0003278  |
| rs62518682  | 8 | 72739855 T     | 23 | 13 C  | 0.0003278  |
| rs139658753 | 8 | 72740975 TTCTC | 23 | 13 T  | 0.0003278  |
| rs56262713  | 8 | 85281410 G     | 20 | 11 C  | 0.0008202  |
| rs783783    | 8 | 85403656 T     | 28 | 19 G  | 0.0002695  |
| rs201122439 | 8 | 85819551 T     | 34 | 25 A  | 0.00006745 |
| rs4400401   | 8 | 88328968 A     | 13 | 4 G   | 0.000883   |
| 8:88337898  | 8 | 88337898 G     | 13 | 4 A   | 0.000981   |
| rs77155700  | 8 | 89853307 C     | 2  | 22 T  | 0.0009583  |
| rs79954560  | 8 | 89859652 T     | 2  | 22 C  | 0.0009583  |
| rs140507702 | 8 | 89861766 C     | 2  | 23 T  | 0.0005167  |
| rs6994018   | 8 | 89863807 C     | 2  | 23 T  | 0.0005167  |
| rs370170108 | 8 | 89868860 T     | 2  | 22 C  | 0.0009583  |
| 8:89869753  | 8 | 89869753 C     | 2  | 22 T  | 0.0009583  |
| rs7841185   | 8 | 89871813 A     | 2  | 22 G  | 0.0009583  |
| rs113304118 | 8 | 89879992 C     | 1  | 20 G  | 0.0004202  |
| rs1391629   | 8 | 89891698 G     | 2  | 22 A  | 0.0009583  |
| rs79888923  | 8 | 89896133 A     | 2  | 22 T  | 0.0009583  |
| rs142214846 | 8 | 89896412 GA    | 2  | 22 G  | 0.0009583  |
| rs79450712  | 8 | 89897429 C     | 2  | 22 T  | 0.0009583  |
| rs79342344  | 8 | 89897987 C     | 2  | 22 A  | 0.0009583  |
| rs12545589  | 8 | 89898996 G     | 2  | 22 A  | 0.0009583  |
| rs34462248  | 8 | 90480215 T     | 1  | 19 C  | 0.0008417  |
| rs185504961 | 8 | 94163993 C     | 21 | 11 A  | 0.0003953  |
| rs59851916  | 8 | 94190441 C     | 20 | 10 G  | 0.0005561  |
| rs16915713  | 8 | 94190752 A     | 20 | 11 G  | 0.0008202  |
| rs72662246  | 8 | 94191231 A     | 20 | 11 T  | 0.0008202  |
| rs2197673   | 8 | 94192043 A     | 20 | 11 T  | 0.0008202  |
| rs1374631   | 8 | 94192133 C     | 20 | 11 A  | 0.0008202  |
| rs1374630   | 8 | 94192137 A     | 20 | 11 G  | 0.0008202  |
| rs1374629   | 8 | 94192318 T     | 20 | 11 C  | 0.0008202  |
| rs148531481 | 8 | 94192592 C     | 20 | 11 CT | 0.0008202  |
| rs16915718  | 8 | 94192856 C     | 20 | 11 T  | 0.0008202  |
| rs66461754  | 8 | 94193026 A     | 20 | 11 G  | 0.0008202  |
| rs10504927  | 8 | 94193643 T     | 20 | 11 A  | 0.0008202  |
| rs61578878  | 8 | 94196408 G     | 20 | 11 T  | 0.0008202  |
| 8:95877242  | 8 | 95877242 AT    | 1  | 19 A  | 0.0008417  |
| rs7828927   | 8 | 99123614 C     | 15 | 5 T   | 0.0003715  |

|             |   |                       |    |          |           |
|-------------|---|-----------------------|----|----------|-----------|
| rs4543513   | 8 | 99148285 C            | 16 | 6 A      | 0.0005436 |
| rs1264865   | 8 | 102857833 G           | 6  | 32 A     | 0.00098   |
| rs1264968   | 8 | 102907502 C           | 2  | 22 G     | 0.0009525 |
| rs150629554 | 8 | 103218466 TA          | 16 | 7 T      | 0.0009539 |
| rs28758972  | 8 | 108777198 A           | 7  | 0 C      | 0.0009566 |
| rs138007099 | 8 | 115585034 CTTTACTTCCT | 9  | 1 C      | 0.0007194 |
| rs138795202 | 8 | 115585723 A           | 9  | 1 ACAC   | 0.0007194 |
| rs56358453  | 8 | 115585748 G           | 9  | 1 C      | 0.0007194 |
| rs12682243  | 8 | 115589058 A           | 9  | 1 G      | 0.0007194 |
| rs4278177   | 8 | 115589089 A           | 9  | 1 C      | 0.0007194 |
| rs1390802   | 8 | 115589367 C           | 9  | 1 T      | 0.0007194 |
| rs11987607  | 8 | 115589433 C           | 9  | 1 T      | 0.0007194 |
| rs112972565 | 8 | 115592838 T           | 9  | 1 C      | 0.0007194 |
| rs188331229 | 8 | 115593078 G           | 9  | 1 T      | 0.0007194 |
| 8:115595036 | 8 | 115595036 CT          | 7  | 0 C      | 0.0008679 |
| 8:115595287 | 8 | 115595287 G           | 9  | 1 C      | 0.0007194 |
| rs144558766 | 8 | 115595780 T           | 9  | 1 C      | 0.0007194 |
| rs368858621 | 8 | 115595883 T           | 9  | 0 C      | 0.0001034 |
| 8:115596736 | 8 | 115596736 A           | 9  | 1 G      | 0.0007194 |
| rs4360323   | 8 | 115597453 G           | 9  | 1 T      | 0.0007194 |
| rs189798615 | 8 | 115597550 A           | 9  | 1 G      | 0.0007194 |
| rs4375035   | 8 | 115597614 T           | 9  | 1 G      | 0.0007194 |
| rs113058397 | 8 | 115598479 T           | 9  | 1 C      | 0.0007194 |
| rs113913892 | 8 | 115598520 A           | 9  | 1 T      | 0.0007194 |
| rs72688152  | 8 | 115598609 C           | 9  | 1 T      | 0.0007194 |
| rs140621    | 8 | 115601414 T           | 9  | 1 A      | 0.0007194 |
| rs140623    | 8 | 115601454 T           | 9  | 1 C      | 0.0007194 |
| rs140624    | 8 | 115601470 C           | 9  | 1 G      | 0.0007194 |
| rs72688155  | 8 | 115603416 A           | 9  | 1 G      | 0.0007194 |
| rs72688157  | 8 | 115605160 C           | 9  | 1 A      | 0.0007194 |
| rs72688158  | 8 | 115606114 C           | 9  | 1 G      | 0.0007194 |
| rs72688160  | 8 | 115606270 G           | 9  | 1 A      | 0.0007194 |
| rs72688161  | 8 | 115607364 T           | 9  | 1 C      | 0.0007194 |
| rs72688163  | 8 | 115607738 T           | 9  | 1 A      | 0.0007194 |
| rs72688165  | 8 | 115609100 C           | 9  | 1 T      | 0.0007194 |
| rs61119861  | 8 | 115609854 T           | 9  | 1 C      | 0.0007194 |
| rs61642028  | 8 | 115609982 C           | 9  | 1 T      | 0.0007194 |
| rs111607481 | 8 | 115610153 G           | 9  | 1 GATTTT | 0.0007194 |
| rs11436316  | 8 | 115611394 AC          | 9  | 1 A      | 0.0007194 |
| rs149860162 | 8 | 115611534 A           | 9  | 1 AAATT  | 0.0007194 |
| rs11436317  | 8 | 115611558 CA          | 9  | 1 C      | 0.0007194 |



|             |   |                |    |       |            |
|-------------|---|----------------|----|-------|------------|
| rs1010296   | 8 | 115612916 G    | 9  | 1 A   | 0.0007194  |
| rs59874151  | 8 | 115613474 G    | 9  | 1 A   | 0.0007194  |
| rs141271051 | 8 | 115614789 G    | 9  | 1 GA  | 0.0007194  |
| rs1390805   | 8 | 115615140 C    | 9  | 1 A   | 0.0007194  |
| rs10505224  | 8 | 115615472 G    | 9  | 1 C   | 0.0008107  |
| rs72688171  | 8 | 115617154 A    | 9  | 1 G   | 0.0007194  |
| rs6993330   | 8 | 115618369 G    | 9  | 1 A   | 0.0007194  |
| rs990064    | 8 | 115620846 A    | 9  | 1 G   | 0.0007194  |
| rs72688174  | 8 | 115621273 T    | 9  | 1 G   | 0.0007194  |
| rs67259516  | 8 | 115622714 A    | 9  | 1 G   | 0.0007194  |
| rs11987094  | 8 | 115623858 G    | 9  | 1 T   | 0.0007194  |
| rs113317677 | 8 | 115624633 GA   | 9  | 1 G   | 0.0007194  |
| rs56744618  | 8 | 115625115 G    | 9  | 1 A   | 0.0007194  |
| rs10568390  | 8 | 115625262 A    | 9  | 1 ATG | 0.0007194  |
| rs716319    | 8 | 115626526 G    | 9  | 1 A   | 0.0007194  |
| rs72688177  | 8 | 115628267 A    | 9  | 1 G   | 0.0007194  |
| rs11989617  | 8 | 115630616 A    | 9  | 1 G   | 0.0007194  |
| rs12675391  | 8 | 115632043 T    | 9  | 1 C   | 0.0007194  |
| rs9632820   | 8 | 115633517 G    | 21 | 11 T  | 0.0003953  |
| rs5894209   | 8 | 115634776 ATTC | 27 | 18 A  | 0.0004513  |
| rs1390806   | 8 | 115635282 A    | 9  | 1 G   | 0.0008107  |
| rs28460811  | 8 | 115635497 C    | 24 | 13 T  | 0.0001822  |
| rs4027275   | 8 | 115636252 C    | 23 | 13 A  | 0.0006366  |
| rs148024664 | 8 | 115637496 G    | 10 | 1 GC  | 0.0003065  |
| rs72688180  | 8 | 115638469 C    | 10 | 1 G   | 0.0003065  |
| rs1156022   | 8 | 115641238 C    | 24 | 13 T  | 0.0001822  |
| rs7846669   | 8 | 115641841 C    | 24 | 13 T  | 0.0001822  |
| rs72688182  | 8 | 115641954 T    | 9  | 1 C   | 0.0008107  |
| rs6469535   | 8 | 115642408 G    | 27 | 18 T  | 0.0004513  |
| rs10087123  | 8 | 115643325 T    | 24 | 13 C  | 0.0001822  |
| rs201102203 | 8 | 115644084 A    | 9  | 1 C   | 0.0008107  |
| rs140178196 | 8 | 115644994 T    | 9  | 1 C   | 0.0008107  |
| 8:115645784 | 8 | 115645784 T    | 11 | 1 G   | 0.00006485 |
| rs374695779 | 8 | 115645976 G    | 9  | 1 A   | 0.0008107  |
| rs200975191 | 8 | 115646810 A    | 21 | 11 G  | 0.0003953  |
| rs150137951 | 8 | 115648635 T    | 9  | 1 C   | 0.0007194  |
| rs142867399 | 8 | 115648840 T    | 9  | 1 G   | 0.0007194  |
| rs9297529   | 8 | 115649127 A    | 21 | 11 G  | 0.0003953  |
| rs75777265  | 8 | 115649722 C    | 9  | 1 T   | 0.0007194  |
| rs72688185  | 8 | 115650891 G    | 9  | 1 A   | 0.0007194  |
| rs182353197 | 8 | 115652354 A    | 9  | 1 T   | 0.0007194  |

|             |   |                |    |           |           |
|-------------|---|----------------|----|-----------|-----------|
| rs75910793  | 8 | 115652678 G    | 9  | 1 A       | 0.0007194 |
| rs11996788  | 8 | 115653663 G    | 9  | 1 C       | 0.0007194 |
| rs931614    | 8 | 115653998 A    | 9  | 1 G       | 0.0007194 |
| rs1496752   | 8 | 115654884 T    | 9  | 1 C       | 0.0007194 |
| rs72688196  | 8 | 115663941 G    | 9  | 1 C       | 0.0007194 |
| rs200567012 | 8 | 115666287 T    | 9  | 1 G       | 0.0007194 |
| 8:115667919 | 8 | 115667919 A    | 9  | 1 ATTTTTT | 0.0005223 |
| rs10088421  | 8 | 115668528 G    | 21 | 11 A      | 0.0003953 |
| rs72688199  | 8 | 115670389 T    | 9  | 1 G       | 0.0007194 |
| rs5894213   | 8 | 115672710 A    | 21 | 11 AT     | 0.0003953 |
| rs56335213  | 8 | 115675219 A    | 9  | 1 C       | 0.0007194 |
| rs6985846   | 8 | 115683736 G    | 20 | 11 T      | 0.0008202 |
| rs4364661   | 8 | 115686399 A    | 20 | 11 G      | 0.0008202 |
| rs4610784   | 8 | 115688964 C    | 20 | 11 T      | 0.0008202 |
| rs12681320  | 8 | 115692959 G    | 20 | 11 C      | 0.0008202 |
| rs28605498  | 8 | 115693802 G    | 20 | 11 C      | 0.0008202 |
| rs28445023  | 8 | 115701338 T    | 13 | 3 C       | 0.0002409 |
| rs28505858  | 8 | 115707801 T    | 13 | 3 C       | 0.0002409 |
| rs7827613   | 8 | 115712241 G    | 13 | 3 A       | 0.0002409 |
| rs10086649  | 8 | 115713721 C    | 9  | 1 G       | 0.0007406 |
| rs201598000 | 8 | 115713723 C    | 13 | 3 G       | 0.0001768 |
| 8:115713725 | 8 | 115713725 C    | 9  | 1 G       | 0.0007194 |
| 8:115713727 | 8 | 115713727 C    | 9  | 1 G       | 0.0007194 |
| 8:115714930 | 8 | 115714930 T    | 9  | 1 TA      | 0.0007194 |
| rs10109368  | 8 | 115715757 C    | 13 | 3 T       | 0.0002409 |
| rs71886645  | 8 | 115717208 T    | 13 | 3 TAATA   | 0.0002409 |
| rs10100267  | 8 | 115721881 T    | 13 | 3 C       | 0.0002409 |
| rs12677228  | 8 | 115723817 G    | 21 | 11 A      | 0.0003953 |
| rs10955729  | 8 | 115724259 T    | 21 | 11 C      | 0.0003953 |
| rs7462721   | 8 | 115725090 G    | 21 | 11 A      | 0.0003953 |
| rs6988312   | 8 | 115726314 G    | 21 | 11 T      | 0.0003953 |
| rs7006212   | 8 | 115726321 A    | 21 | 11 C      | 0.0003953 |
| rs2198629   | 8 | 115727285 G    | 21 | 11 A      | 0.0003953 |
| rs6994458   | 8 | 115727826 C    | 21 | 11 T      | 0.0003953 |
| rs6989479   | 8 | 115730294 T    | 21 | 11 A      | 0.0003953 |
| rs3062473   | 8 | 115731072 TTAG | 13 | 3 T       | 0.0002409 |
| rs35150135  | 8 | 115731550 T    | 13 | 4 C       | 0.000883  |
| rs73324878  | 8 | 122791268 T    | 22 | 13 C      | 0.0006749 |
| rs80348309  | 8 | 122799461 A    | 22 | 13 T      | 0.0006749 |
| rs16896129  | 8 | 122809618 A    | 20 | 11 G      | 0.0008202 |
| rs57882380  | 8 | 122810517 T    | 20 | 11 TAATC  | 0.0008202 |

|             |   |               |    |          |            |
|-------------|---|---------------|----|----------|------------|
| rs73708584  | 8 | 122811694 A   | 20 | 11 C     | 0.0008202  |
| rs371445185 | 8 | 122818223 C   | 20 | 11 CT    | 0.0008202  |
| rs35421863  | 8 | 122818227 C   | 20 | 11 T     | 0.0008202  |
| rs113486044 | 8 | 122829554 GGT | 20 | 11 G     | 0.0008202  |
| rs6984548   | 8 | 122829941 G   | 20 | 11 T     | 0.0008202  |
| rs73326834  | 8 | 122830447 A   | 20 | 11 G     | 0.0008202  |
| rs73326837  | 8 | 122831066 A   | 20 | 11 G     | 0.0008202  |
| rs77556695  | 8 | 122831393 A   | 20 | 11 G     | 0.0008202  |
| rs73326841  | 8 | 122833648 G   | 20 | 11 T     | 0.0008202  |
| rs6999162   | 8 | 122838008 C   | 20 | 11 T     | 0.0008202  |
| rs66461063  | 8 | 122839750 T   | 20 | 11 TGTTG | 0.0008202  |
| rs10101648  | 8 | 122839754 G   | 23 | 14 A     | 0.0007414  |
| rs73326848  | 8 | 122839863 T   | 20 | 11 C     | 0.0008202  |
| rs57936719  | 8 | 122840333 G   | 20 | 11 C     | 0.0008202  |
| rs72609838  | 8 | 122842632 C   | 1  | 21 T     | 0.0002339  |
| rs4474034   | 8 | 122842642 C   | 25 | 15 T     | 0.0002543  |
| rs4132903   | 8 | 122843830 T   | 25 | 15 C     | 0.0002543  |
| rs6983575   | 8 | 122844454 C   | 25 | 15 T     | 0.0002543  |
| rs6983605   | 8 | 122844564 A   | 25 | 15 C     | 0.0002543  |
| rs12681688  | 8 | 122845858 T   | 22 | 12 C     | 0.000477   |
| rs111416674 | 8 | 122846406 T   | 22 | 12 C     | 0.000477   |
| rs72609839  | 8 | 122849590 A   | 1  | 21 C     | 0.0002339  |
| rs60304095  | 8 | 122852238 C   | 1  | 21 A     | 0.0002339  |
| rs36006614  | 8 | 122860595 A   | 1  | 21 AT    | 0.0002339  |
| rs10956060  | 8 | 122860693 G   | 1  | 21 A     | 0.0002339  |
| rs10956061  | 8 | 122860731 C   | 1  | 21 A     | 0.0002339  |
| rs16896253  | 8 | 122869617 G   | 1  | 21 T     | 0.0002339  |
| rs72609840  | 8 | 122885169 C   | 1  | 21 T     | 0.0002339  |
| rs16896361  | 8 | 122890522 C   | 1  | 19 A     | 0.0008417  |
| rs66516233  | 8 | 122892653 A   | 1  | 19 G     | 0.0008417  |
| 8:124856940 | 8 | 124856940 T   | 15 | 5 G      | 0.0003715  |
| rs2385682   | 8 | 127681857 G   | 0  | 14 C     | 0.0009049  |
| 8:130622402 | 8 | 130622402 G   | 27 | 17 A     | 0.000186   |
| rs7840584   | 8 | 130622403 T   | 27 | 18 C     | 0.0004001  |
| 8:130622405 | 8 | 130622405 T   | 22 | 10 C     | 0.00007379 |
| rs77848529  | 8 | 131834788 G   | 32 | 22 C     | 0.00008721 |
| 8:131834790 | 8 | 131834790 A   | 25 | 13 ATCC  | 0.0000842  |
| 8:131834792 | 8 | 131834792 G   | 23 | 13 C     | 0.0003278  |
| 8:131834793 | 8 | 131834793 A   | 23 | 13 C     | 0.0003278  |
| 9:14695     | 9 | 14695 A       | 8  | 0 G      | 0.0003016  |
| 9:30098     | 9 | 30098 T       | 9  | 0 C      | 0.0001034  |

|             |   |                 |    |       |            |
|-------------|---|-----------------|----|-------|------------|
| rs7042540   | 9 | 343859 C        | 8  | 41 T  | 0.0001361  |
| rs13295058  | 9 | 858735 A        | 12 | 45 G  | 0.0009266  |
| rs7021646   | 9 | 860004 C        | 11 | 45 T  | 0.0004315  |
| rs10969013  | 9 | 2929424 G       | 7  | 35 A  | 0.0007198  |
| rs7864285   | 9 | 2930820 G       | 5  | 31 C  | 0.0006549  |
| rs71493307  | 9 | 2930908 G       | 5  | 31 GT | 0.0006549  |
| rs10121692  | 9 | 2931315 T       | 5  | 31 C  | 0.0006549  |
| rs13292810  | 9 | 2931341 A       | 5  | 31 G  | 0.0006549  |
| rs59601268  | 9 | 2931638 AG      | 5  | 33 A  | 0.0002023  |
| rs34078121  | 9 | 2932355 C       | 6  | 33 A  | 0.0009098  |
| rs12348338  | 9 | 2932407 A       | 5  | 33 C  | 0.0002023  |
| rs7858374   | 9 | 2932813 G       | 5  | 34 A  | 0.0001138  |
| rs4740708   | 9 | 2993975 T       | 7  | 35 C  | 0.0007198  |
| rs7849097   | 9 | 2997408 A       | 7  | 35 C  | 0.0007198  |
| rs10757922  | 9 | 2997536 C       | 7  | 35 T  | 0.0007198  |
| rs1537324   | 9 | 3004105 T       | 6  | 33 C  | 0.0009098  |
| rs7033052   | 9 | 5042981 G       | 37 | 34 C  | 0.0006983  |
| rs372117298 | 9 | 12946036 G      | 30 | 22 A  | 0.0001613  |
| rs62532547  | 9 | 14204068 T      | 0  | 17 C  | 0.0002606  |
| rs62532548  | 9 | 14205054 C      | 0  | 17 T  | 0.0002606  |
| rs62532553  | 9 | 14218106 T      | 0  | 15 C  | 0.0005628  |
| rs35402224  | 9 | 14224117 A      | 0  | 15 C  | 0.0005628  |
| rs200702730 | 9 | 14382344 TGAGA  | 23 | 13 T  | 0.0003278  |
| rs7848552   | 9 | 14500538 C      | 16 | 6 G   | 0.0005436  |
| rs10961546  | 9 | 14510183 T      | 8  | 39 C  | 0.0004628  |
| rs9886866   | 9 | 14510925 C      | 31 | 20 T  | 0.00004024 |
| rs10738363  | 9 | 14511236 G      | 31 | 20 A  | 0.00004024 |
| rs11793755  | 9 | 14511245 A      | 17 | 7 G   | 0.0004382  |
| rs10738364  | 9 | 14511315 C      | 31 | 20 T  | 0.00004024 |
| rs112966547 | 9 | 14511523 ATGAGT | 31 | 20 A  | 0.00004024 |
| rs7023433   | 9 | 14511645 A      | 31 | 20 C  | 0.00004024 |
| rs7040054   | 9 | 14511793 T      | 31 | 20 A  | 0.00004024 |
| rs10738365  | 9 | 14512767 T      | 33 | 28 A  | 0.0009909  |
| rs4740579   | 9 | 14514325 T      | 25 | 14 C  | 0.0001947  |
| rs4741388   | 9 | 14514366 C      | 25 | 14 T  | 0.0001947  |
| rs10756564  | 9 | 14514783 C      | 30 | 19 T  | 0.00006044 |
| rs963659    | 9 | 14515598 C      | 16 | 6 G   | 0.0005436  |
| rs4741390   | 9 | 14524784 G      | 18 | 7 A   | 0.0001975  |
| rs10961553  | 9 | 14527083 G      | 33 | 25 T  | 0.0002294  |
| rs76268233  | 9 | 19683470 G      | 8  | 0 A   | 0.0003016  |
| rs10964259  | 9 | 19740463 C      | 7  | 0 T   | 0.0008679  |

|             |   |            |    |       |           |
|-------------|---|------------|----|-------|-----------|
| rs10757098  | 9 | 19845883 A | 13 | 4 G   | 0.000883  |
| rs12344856  | 9 | 20031365 C | 4  | 28 A  | 0.0008078 |
| rs12552907  | 9 | 20202697 A | 7  | 0 G   | 0.0008679 |
| rs35789870  | 9 | 20203975 T | 7  | 0 TCA | 0.0008679 |
| rs67815395  | 9 | 20204573 A | 7  | 0 G   | 0.0008679 |
| rs67851366  | 9 | 20207782 T | 7  | 0 C   | 0.0008679 |
| rs13301831  | 9 | 20210027 C | 7  | 0 G   | 0.0008679 |
| rs1333775   | 9 | 20217025 A | 7  | 0 G   | 0.0008679 |
| rs7852474   | 9 | 20218285 C | 7  | 0 G   | 0.0008679 |
| rs7867959   | 9 | 20218463 A | 7  | 0 T   | 0.0008679 |
| rs10465049  | 9 | 20219031 A | 7  | 0 G   | 0.0008679 |
| rs10964480  | 9 | 20225817 T | 7  | 0 C   | 0.0008679 |
| rs4977395   | 9 | 20226358 G | 7  | 0 A   | 0.0008679 |
| rs10811332  | 9 | 20227187 G | 7  | 0 A   | 0.0008679 |
| rs11560492  | 9 | 20231812 A | 7  | 0 G   | 0.0008679 |
| rs149905185 | 9 | 20232312 G | 7  | 0 C   | 0.0008679 |
| rs200377511 | 9 | 20232602 T | 7  | 0 C   | 0.0008679 |
| rs138189734 | 9 | 20234370 T | 7  | 0 C   | 0.0008679 |
| rs4562423   | 9 | 20235378 T | 7  | 0 C   | 0.0008679 |
| rs7040926   | 9 | 20241351 C | 9  | 1 T   | 0.0007194 |
| rs4977398   | 9 | 20243207 T | 7  | 0 A   | 0.0008679 |
| rs1379217   | 9 | 20244758 G | 10 | 1 A   | 0.0002681 |
| rs10964495  | 9 | 20245283 C | 10 | 1 T   | 0.0002681 |
| rs2034876   | 9 | 20245896 G | 10 | 1 A   | 0.0002681 |
| rs765668    | 9 | 20248289 C | 10 | 1 G   | 0.0002681 |
| rs35141027  | 9 | 20250667 A | 7  | 0 AT  | 0.0008679 |
| rs10757127  | 9 | 20260958 T | 7  | 0 A   | 0.0008679 |
| rs28391312  | 9 | 20261281 A | 7  | 0 T   | 0.0008679 |
| rs16923521  | 9 | 20261635 C | 7  | 0 T   | 0.0008679 |
| rs12553948  | 9 | 20263186 G | 10 | 1 A   | 0.0002681 |
| rs4977406   | 9 | 20267556 A | 7  | 0 G   | 0.0008679 |
| rs7034958   | 9 | 20268487 C | 7  | 0 G   | 0.0008679 |
| rs1551535   | 9 | 20270444 A | 7  | 0 C   | 0.0008679 |
| rs57859418  | 9 | 20274356 C | 10 | 1 A   | 0.0002681 |
| rs4146635   | 9 | 20274698 G | 10 | 1 A   | 0.0002681 |
| rs7041951   | 9 | 20275354 G | 7  | 0 C   | 0.0008679 |
| rs10964511  | 9 | 20276363 C | 10 | 1 T   | 0.0002681 |
| rs4977251   | 9 | 20279793 G | 10 | 1 A   | 0.0002681 |
| rs4977409   | 9 | 20281811 G | 7  | 0 T   | 0.0008679 |
| rs4977412   | 9 | 20282412 G | 7  | 0 T   | 0.0008679 |
| rs60615195  | 9 | 20284302 T | 7  | 0 G   | 0.0008679 |

|             |   |             |    |         |            |
|-------------|---|-------------|----|---------|------------|
| rs12337967  | 9 | 26546715 G  | 1  | 20 C    | 0.0004893  |
| 9:32578420  | 9 | 32578420 T  | 7  | 0 C     | 0.0008679  |
| 9:32578423  | 9 | 32578423 T  | 7  | 0 A     | 0.0008679  |
| rs117400746 | 9 | 32908910 T  | 1  | 21 C    | 0.000241   |
| rs1530308   | 9 | 32911524 C  | 3  | 27 T    | 0.0002808  |
| rs200201160 | 9 | 40323997 A  | 0  | 16 G    | 0.0005294  |
| rs4961872   | 9 | 43396853 A  | 14 | 5 G     | 0.0008508  |
| rs10907621  | 9 | 43510463 T  | 10 | 2 A     | 0.000793   |
| rs143890219 | 9 | 43698587 T  | 10 | 2 C     | 0.0009067  |
| rs28572375  | 9 | 43702852 A  | 2  | 22 C    | 0.0009525  |
| rs10796812  | 9 | 44793373 T  | 14 | 4 C     | 0.0003939  |
| rs201420555 | 9 | 65595104 A  | 2  | 25 G    | 0.0003162  |
| rs373640745 | 9 | 65595491 T  | 2  | 25 C    | 0.0002841  |
| rs73648380  | 9 | 65600248 T  | 2  | 22 C    | 0.0009583  |
| rs199513089 | 9 | 65607945 A  | 2  | 22 G    | 0.0009583  |
| rs147043737 | 9 | 65611113 A  | 2  | 25 C    | 0.0003162  |
| rs200225501 | 9 | 65613073 C  | 2  | 25 G    | 0.0003162  |
| rs4878855   | 9 | 65620187 T  | 2  | 25 G    | 0.0002833  |
| rs147400228 | 9 | 65623432 T  | 2  | 25 A    | 0.0003162  |
| rs143687106 | 9 | 65630711 T  | 2  | 25 C    | 0.0003162  |
| rs200699052 | 9 | 66258887 C  | 14 | 5 A     | 0.0008508  |
| rs71484888  | 9 | 66280230 G  | 14 | 5 C     | 0.0008508  |
| rs115510119 | 9 | 66303655 A  | 14 | 5 G     | 0.0008508  |
| rs188552917 | 9 | 66339289 A  | 14 | 5 T     | 0.0006534  |
| rs201820068 | 9 | 67328193 T  | 8  | 0 C     | 0.0003016  |
| rs199578430 | 9 | 67328446 A  | 9  | 1 G     | 0.0007194  |
| 9:67343530  | 9 | 67343530 A  | 7  | 0 G     | 0.0008679  |
| 9:68416460  | 9 | 68416460 G  | 0  | 15 A    | 0.0005628  |
| rs76489623  | 9 | 68474714 T  | 12 | 2 G     | 0.0001711  |
| rs202140006 | 9 | 69004570 A  | 9  | 1 T     | 0.0007194  |
| rs374991588 | 9 | 69792207 G  | 11 | 1 C     | 0.00009775 |
| rs76125007  | 9 | 69957710 C  | 11 | 2 G     | 0.0004434  |
| 9:70174858  | 9 | 70174858 G  | 7  | 0 T     | 0.0008679  |
| rs200861709 | 9 | 75711139 A  | 11 | 43 ATTT | 0.0008678  |
| rs140164764 | 9 | 75711154 A  | 10 | 42 T    | 0.0006808  |
| rs13299218  | 9 | 75714793 A  | 11 | 43 T    | 0.0008678  |
| rs7041453   | 9 | 75715270 T  | 3  | 29 C    | 0.0001425  |
| rs367712245 | 9 | 75715272 T  | 11 | 43 C    | 0.0008678  |
| rs57593530  | 9 | 76959262 G  | 14 | 52 GT   | 0.0001327  |
| rs10869673  | 9 | 78580233 T  | 15 | 52 C    | 0.0006042  |
| rs11432519  | 9 | 78587997 TA | 34 | 25 T    | 0.00006745 |

|             |   |                |    |       |            |
|-------------|---|----------------|----|-------|------------|
| rs2377637   | 9 | 78975569 A     | 16 | 7 G   | 0.0009539  |
| rs11144853  | 9 | 78976290 C     | 16 | 7 A   | 0.0009539  |
| rs11144855  | 9 | 78977568 A     | 16 | 7 G   | 0.0009539  |
| rs34662513  | 9 | 78980960 CTG   | 27 | 20 C  | 0.0008358  |
| rs11454957  | 9 | 78981576 TA    | 16 | 7 T   | 0.0009539  |
| rs143198459 | 9 | 79101832 AAAAC | 12 | 45 A  | 0.0009266  |
| rs590666    | 9 | 79103366 T     | 16 | 53 C  | 0.0006806  |
| rs503222    | 9 | 79104807 T     | 14 | 51 C  | 0.000328   |
| rs608697    | 9 | 79105108 A     | 15 | 51 G  | 0.0006974  |
| rs620295    | 9 | 79105317 T     | 15 | 51 C  | 0.0006974  |
| rs2476940   | 9 | 79105850 T     | 15 | 51 C  | 0.0006974  |
| rs2476941   | 9 | 79107595 T     | 15 | 51 C  | 0.0006974  |
| rs1085341   | 9 | 79107749 T     | 15 | 51 C  | 0.0006974  |
| rs664013    | 9 | 79108199 G     | 15 | 51 T  | 0.0006974  |
| rs587111    | 9 | 79109110 A     | 15 | 51 G  | 0.0006974  |
| rs587171    | 9 | 79109158 G     | 15 | 51 C  | 0.0006974  |
| rs619429    | 9 | 79111675 A     | 15 | 51 C  | 0.0006974  |
| rs634064    | 9 | 79112688 A     | 14 | 51 C  | 0.000328   |
| rs566470    | 9 | 79113087 G     | 15 | 51 A  | 0.0006974  |
| rs785927    | 9 | 79113497 A     | 15 | 51 T  | 0.0006974  |
| rs785907    | 9 | 79121085 G     | 6  | 33 T  | 0.0009098  |
| rs7026142   | 9 | 79125260 A     | 16 | 53 C  | 0.0006806  |
| rs7026268   | 9 | 79125340 A     | 16 | 53 C  | 0.0006806  |
| rs688268    | 9 | 79139590 T     | 6  | 35 G  | 0.0002764  |
| rs582011    | 9 | 79251600 T     | 15 | 51 A  | 0.0006974  |
| rs605523    | 9 | 79254447 T     | 15 | 55 G  | 0.00009899 |
| rs11432533  | 9 | 79255482 A     | 15 | 55 AT | 0.00009899 |
| rs478699    | 9 | 79258395 T     | 14 | 55 C  | 0.00004213 |
| rs478792    | 9 | 79258419 G     | 14 | 56 C  | 0.00002211 |
| rs511040    | 9 | 79259592 C     | 15 | 58 T  | 0.00002069 |
| rs512951    | 9 | 79259850 A     | 14 | 55 G  | 0.00004213 |
| rs526347    | 9 | 79264147 T     | 15 | 56 C  | 0.0000815  |
| rs370347624 | 9 | 79264272 TATC  | 16 | 58 T  | 0.00008167 |
| rs488165    | 9 | 79312409 G     | 15 | 52 A  | 0.0006042  |
| rs489069    | 9 | 79312491 C     | 15 | 52 A  | 0.0006042  |
| rs684639    | 9 | 79312579 A     | 15 | 52 T  | 0.0006042  |
| rs685011    | 9 | 79312627 C     | 15 | 52 G  | 0.0006042  |
| rs2487263   | 9 | 79313293 A     | 15 | 52 G  | 0.0006042  |
| rs519983    | 9 | 79313525 A     | 15 | 52 G  | 0.0006042  |
| rs551262    | 9 | 79314660 T     | 15 | 52 A  | 0.0006042  |
| rs620985    | 9 | 79318921 A     | 15 | 52 G  | 0.0006042  |

|            |   |             |    |                  |           |
|------------|---|-------------|----|------------------|-----------|
| rs683866   | 9 | 79322068 G  | 15 | 52 T             | 0.0006042 |
| rs2307907  | 9 | 79324135 A  | 15 | 52 ATGACTGTTGCAG | 0.0006042 |
| rs530978   | 9 | 79324179 G  | 15 | 52 A             | 0.0006042 |
| rs557352   | 9 | 79324741 T  | 15 | 52 C             | 0.0006042 |
| rs600859   | 9 | 79325558 G  | 15 | 52 C             | 0.0006042 |
| rs626837   | 9 | 79326770 A  | 15 | 52 G             | 0.0006042 |
| rs630423   | 9 | 79327585 G  | 15 | 52 A             | 0.0006042 |
| rs641088   | 9 | 79327670 A  | 15 | 52 G             | 0.0006042 |
| rs537903   | 9 | 79327732 T  | 15 | 52 C             | 0.0006042 |
| rs571960   | 9 | 79329205 G  | 15 | 52 T             | 0.0006042 |
| rs658548   | 9 | 79329257 T  | 15 | 52 C             | 0.0006042 |
| rs659003   | 9 | 79329337 G  | 15 | 52 T             | 0.0006042 |
| rs35230302 | 9 | 79329462 CA | 15 | 52 C             | 0.0006042 |
| rs491798   | 9 | 79330169 T  | 15 | 52 A             | 0.0006042 |
| rs1854439  | 9 | 79335763 T  | 32 | 30 C             | 0.0009098 |
| rs11141862 | 9 | 90139441 T  | 6  | 34 C             | 0.0005004 |
| 9:94981017 | 9 | 94981017 G  | 8  | 0 A              | 0.0003016 |
| 9:94981023 | 9 | 94981023 G  | 8  | 0 A              | 0.0003016 |
| rs10987898 | 9 | 101595443 G | 32 | 25 T             | 0.0004454 |
| rs10760544 | 9 | 101596861 C | 32 | 24 A             | 0.0002243 |
| rs2416537  | 9 | 101598071 A | 34 | 29 G             | 0.0006139 |
| rs3216734  | 9 | 101599211 A | 26 | 18 AT            | 0.0007809 |
| rs12377568 | 9 | 101632069 C | 16 | 53 G             | 0.0006806 |
| rs2698999  | 9 | 102735865 A | 37 | 34 C             | 0.0006983 |
| rs2791336  | 9 | 102739446 C | 37 | 34 G             | 0.0006983 |
| rs2791337  | 9 | 102741443 C | 37 | 32 T             | 0.0002611 |
| rs7862460  | 9 | 102748888 G | 37 | 34 C             | 0.0006983 |
| rs12685650 | 9 | 102749175 G | 37 | 34 C             | 0.0006983 |
| rs10819714 | 9 | 102751188 T | 37 | 34 C             | 0.0006983 |
| rs7874449  | 9 | 102752182 A | 37 | 34 G             | 0.0006983 |
| rs10988934 | 9 | 102752686 T | 37 | 34 C             | 0.0006983 |
| rs10819715 | 9 | 102769559 C | 37 | 34 G             | 0.0006983 |
| rs2209082  | 9 | 102770884 C | 37 | 34 T             | 0.0006983 |
| rs10988945 | 9 | 102776091 T | 37 | 34 A             | 0.0006983 |
| rs7870585  | 9 | 102779098 A | 37 | 34 G             | 0.0006983 |
| rs4742779  | 9 | 102781837 C | 37 | 33 A             | 0.0006234 |
| rs1578646  | 9 | 102798031 G | 37 | 34 A             | 0.0006983 |
| rs2093696  | 9 | 102799758 A | 37 | 34 G             | 0.0006983 |
| rs35493819 | 9 | 102803899 A | 37 | 34 G             | 0.0006983 |
| rs4743379  | 9 | 102807181 A | 37 | 34 C             | 0.0006983 |
| rs4743380  | 9 | 102807279 G | 37 | 34 A             | 0.0006983 |



|             |   |              |    |        |           |
|-------------|---|--------------|----|--------|-----------|
| rs3052013   | 9 | 102812595 C  | 37 | 34 CAT | 0.0006983 |
| rs41346545  | 9 | 102816751 A  | 37 | 34 C   | 0.0006983 |
| rs4743381   | 9 | 102817835 C  | 37 | 34 T   | 0.0006983 |
| rs4743382   | 9 | 102817841 T  | 37 | 34 C   | 0.0006983 |
| rs942163    | 9 | 102820002 C  | 37 | 34 T   | 0.0006983 |
| rs7042194   | 9 | 102821369 A  | 37 | 34 G   | 0.0006983 |
| rs7027536   | 9 | 102829705 G  | 37 | 34 C   | 0.0006983 |
| rs10988961  | 9 | 102829806 A  | 37 | 34 G   | 0.0006983 |
| rs2900234   | 9 | 102830208 T  | 37 | 33 C   | 0.0006234 |
| rs7036518   | 9 | 102839699 C  | 37 | 34 T   | 0.0006983 |
| rs7047092   | 9 | 102839709 A  | 37 | 34 G   | 0.0006983 |
| rs7018981   | 9 | 102842941 C  | 37 | 34 T   | 0.0006983 |
| rs1342147   | 9 | 102844842 A  | 37 | 34 C   | 0.0006983 |
| rs1529191   | 9 | 102845908 A  | 37 | 34 G   | 0.0006983 |
| rs4517187   | 9 | 102850723 A  | 37 | 34 C   | 0.0006983 |
| rs10988969  | 9 | 102852444 G  | 37 | 34 A   | 0.0006983 |
| rs72548315  | 9 | 102857088 TA | 37 | 31 T   | 0.000342  |
| rs2181579   | 9 | 102863821 A  | 37 | 34 C   | 0.0006983 |
| rs12552646  | 9 | 102868475 T  | 37 | 33 C   | 0.0006234 |
| rs10988973  | 9 | 102869846 A  | 37 | 34 G   | 0.0006983 |
| rs1539297   | 9 | 102871586 G  | 37 | 34 A   | 0.0006983 |
| rs10988974  | 9 | 102871835 T  | 37 | 34 C   | 0.0006983 |
| rs4743386   | 9 | 102872241 A  | 37 | 34 G   | 0.0006983 |
| rs11333350  | 9 | 102911331 C  | 35 | 30 CA  | 0.0002569 |
| rs1014651   | 9 | 102976644 G  | 37 | 33 A   | 0.0006234 |
| rs12349610  | 9 | 109404422 A  | 1  | 19 G   | 0.0008417 |
| rs12350586  | 9 | 109404541 A  | 1  | 19 G   | 0.0008417 |
| rs10978580  | 9 | 109410929 T  | 2  | 22 C   | 0.0009583 |
| rs10816411  | 9 | 109411613 T  | 2  | 22 C   | 0.0009583 |
| rs7859930   | 9 | 109412031 T  | 2  | 22 A   | 0.0009583 |
| rs10816412  | 9 | 109412764 T  | 2  | 22 G   | 0.0009583 |
| rs2493636   | 9 | 109520821 A  | 15 | 51 G   | 0.0006974 |
| rs80067155  | 9 | 112068534 C  | 7  | 0 G    | 0.0008679 |
| rs10739293  | 9 | 113058357 G  | 7  | 36 A   | 0.0006639 |
| rs17237455  | 9 | 117483259 C  | 3  | 25 A   | 0.0009258 |
| rs144053768 | 9 | 117495940 CA | 2  | 25 C   | 0.0001556 |
| rs7854152   | 9 | 117497728 C  | 2  | 25 T   | 0.0001556 |
| rs117204803 | 9 | 117503443 A  | 2  | 24 G   | 0.0002818 |
| rs139806730 | 9 | 117522739 C  | 2  | 23 CAT | 0.0005167 |
| rs78069215  | 9 | 117524379 C  | 2  | 23 T   | 0.0005167 |
| rs4978609   | 9 | 117530319 G  | 2  | 23 A   | 0.0005167 |

|             |    |                         |    |       |            |
|-------------|----|-------------------------|----|-------|------------|
| rs12348862  | 9  | 117531308 T             | 2  | 23 C  | 0.0005167  |
| rs12335468  | 9  | 117531374 C             | 2  | 23 T  | 0.0005167  |
| rs6478126   | 9  | 117770400 A             | 20 | 9 G   | 0.0004716  |
| rs34952709  | 9  | 118082431 A             | 22 | 10 AT | 0.00007379 |
| rs62577508  | 9  | 118167915 C             | 14 | 5 T   | 0.0008508  |
| rs72750117  | 9  | 118169815 C             | 14 | 5 A   | 0.0008508  |
| rs62577526  | 9  | 118170841 T             | 14 | 5 C   | 0.0008508  |
| rs62577528  | 9  | 118172545 A             | 14 | 5 G   | 0.0008508  |
| rs959486    | 9  | 118178057 G             | 16 | 6 C   | 0.0005436  |
| rs62577529  | 9  | 118183867 A             | 16 | 6 G   | 0.0005436  |
| rs62577532  | 9  | 118195772 A             | 14 | 5 C   | 0.0008508  |
| rs62576480  | 9  | 118204211 C             | 16 | 6 A   | 0.0005436  |
| rs62576482  | 9  | 118213639 A             | 14 | 5 G   | 0.0008508  |
| rs1335142   | 9  | 118233090 A             | 14 | 5 G   | 0.0008508  |
| rs62576499  | 9  | 118233968 C             | 16 | 6 A   | 0.0005436  |
| rs62576501  | 9  | 118240336 T             | 16 | 6 C   | 0.0005436  |
| rs149182817 | 9  | 118240608 G             | 16 | 6 A   | 0.0005436  |
| rs62576506  | 9  | 118244944 T             | 16 | 6 A   | 0.0005436  |
| rs62576533  | 9  | 118264110 T             | 13 | 4 C   | 0.000883   |
| rs113047360 | 9  | 118347866 T             | 15 | 5 G   | 0.0008419  |
| rs10982832  | 9  | 118348955 C             | 18 | 9 T   | 0.0009279  |
| rs237624    | 9  | 125396192 G             | 16 | 54 C  | 0.0003907  |
| 9:126708698 | 9  | 126708698 CACACACACACAC | 10 | 0 C   | 0.00003497 |
| 9:126708699 | 9  | 126708699 C             | 10 | 0 A   | 0.00003497 |
| 9:126708703 | 9  | 126708703 ACC           | 8  | 0 A   | 0.0003016  |
| rs9299438   | 9  | 136986481 A             | 9  | 1 G   | 0.0007194  |
| rs73559035  | 9  | 137156676 A             | 19 | 9 G   | 0.0004395  |
| rs34540368  | 9  | 138324367 T             | 0  | 16 C  | 0.0005294  |
| rs3812565   | 9  | 139272502 C             | 12 | 45 T  | 0.0009266  |
| rs3812573   | 9  | 139276680 T             | 12 | 46 C  | 0.0005428  |
| rs10781510  | 9  | 139279173 A             | 12 | 46 G  | 0.0005428  |
| rs34826348  | 9  | 139281570 C             | 12 | 46 A  | 0.0005428  |
| rs10870113  | 9  | 139284790 G             | 12 | 46 A  | 0.0005428  |
| 10:1981876  | 10 | 1981876 ACACCTTGGTGTT   | 0  | 15 A  | 0.0005628  |
| rs10903603  | 10 | 1981965 G               | 0  | 15 T  | 0.0005628  |
| rs10903604  | 10 | 1981983 A               | 0  | 15 G  | 0.0005628  |
| rs7096341   | 10 | 1982328 G               | 0  | 15 A  | 0.0005628  |
| rs80100416  | 10 | 1985903 T               | 0  | 15 C  | 0.0005628  |
| rs11250945  | 10 | 1986322 T               | 0  | 15 G  | 0.0005628  |
| rs11250953  | 10 | 1991144 C               | 0  | 15 G  | 0.0005628  |
| rs17157353  | 10 | 1992873 T               | 0  | 15 C  | 0.0005628  |

|             |    |             |    |              |             |
|-------------|----|-------------|----|--------------|-------------|
| rs11250954  | 10 | 1993586 T   | 0  | 15 G         | 0.0005628   |
| 10:4454848  | 10 | 4454848 C   | 6  | 32 T         | 0.00098     |
| rs2397988   | 10 | 4846866 G   | 12 | 47 T         | 0.0004795   |
| rs4881348   | 10 | 4848287 A   | 13 | 47 G         | 0.0009845   |
| rs4881349   | 10 | 4848290 C   | 13 | 47 A         | 0.0009845   |
| rs12769532  | 10 | 4858328 C   | 8  | 38 T         | 0.0005059   |
| rs2123351   | 10 | 4862582 G   | 8  | 40 A         | 0.0002504   |
| rs10904350  | 10 | 4866433 T   | 12 | 46 C         | 0.0005428   |
| rs2277225   | 10 | 7244675 A   | 7  | 37 G         | 0.0003628   |
| rs7920088   | 10 | 7250148 T   | 7  | 37 C         | 0.0003628   |
| rs61835084  | 10 | 7250882 T   | 7  | 37 C         | 0.0003628   |
| rs61835085  | 10 | 7250885 T   | 7  | 37 C         | 0.0003628   |
| rs955921    | 10 | 9425906 G   | 0  | 15 A         | 0.0005628   |
| rs78762327  | 10 | 10750115 A  | 7  | 0 G          | 0.0008679   |
| rs2479895   | 10 | 17530850 C  | 14 | 5 T          | 0.0008508   |
| rs2479894   | 10 | 17531246 C  | 14 | 5 A          | 0.0008508   |
| rs2226249   | 10 | 17531632 A  | 21 | 11 C         | 0.0003953   |
| rs2479893   | 10 | 17532277 C  | 21 | 11 T         | 0.0003953   |
| rs2039976   | 10 | 29192769 C  | 20 | 11 T         | 0.0008202   |
| rs2039977   | 10 | 29192854 C  | 20 | 11 T         | 0.0008202   |
| rs7084821   | 10 | 29200793 G  | 20 | 11 A         | 0.0008202   |
| rs2047242   | 10 | 29201860 A  | 20 | 11 G         | 0.0008202   |
| rs1756742   | 10 | 30247590 A  | 9  | 1 G          | 0.0007194   |
| rs367811925 | 10 | 30962162 C  | 13 | 4 T          | 0.000883    |
| rs112011604 | 10 | 39022249 AG | 21 | 12 A         | 0.0009318   |
| 10:42711053 | 10 | 42711053 A  | 18 | 4 T          | 0.00000678  |
| rs12570505  | 10 | 43276878 G  | 0  | 16 T         | 0.0005294   |
| rs369849154 | 10 | 43327009 T  | 0  | 15 TTTTGG    | 0.0005628   |
| rs72792266  | 10 | 49518130 A  | 10 | 1 G          | 0.0002681   |
| rs4007215   | 10 | 56337604 A  | 27 | 11 AAATAAATG | 0.000001741 |
| rs72051960  | 10 | 56337612 G  | 22 | 7 GAATA      | 0.000001897 |
| 10:60153654 | 10 | 60153654 CA | 10 | 1 C          | 0.0003065   |
| rs150289992 | 10 | 65905314 T  | 8  | 0 G          | 0.0003016   |
| rs201038704 | 10 | 66264592 C  | 7  | 0 CAG        | 0.0008679   |
| rs192062864 | 10 | 66268556 G  | 7  | 0 A          | 0.0008679   |
| rs185216213 | 10 | 66273096 A  | 7  | 0 G          | 0.0008679   |
| rs74142010  | 10 | 71572026 C  | 7  | 0 T          | 0.0008679   |
| rs59999447  | 10 | 71572437 T  | 7  | 0 C          | 0.0008679   |
| rs57843783  | 10 | 71572490 A  | 7  | 0 G          | 0.0008679   |
| rs10999537  | 10 | 72536849 T  | 16 | 7 C          | 0.0009539   |
| rs827347    | 10 | 72655206 G  | 34 | 27 A         | 0.0002666   |

|             |    |                   |    |                       |            |
|-------------|----|-------------------|----|-----------------------|------------|
| rs827349    | 10 | 72655450 G        | 12 | 50 A                  | 0.00007817 |
| rs10823635  | 10 | 72660331 T        | 24 | 12 C                  | 0.00006466 |
| rs146991153 | 10 | 72665149 C        | 11 | 2 CT                  | 0.0004434  |
| rs59844598  | 10 | 72665926 T        | 20 | 9 C                   | 0.0002046  |
| rs78785419  | 10 | 72666056 A        | 20 | 9 AG                  | 0.0002046  |
| rs827344    | 10 | 72667037 G        | 28 | 17 C                  | 0.0000884  |
| rs61851192  | 10 | 72668090 G        | 20 | 9 A                   | 0.0002046  |
| rs75488623  | 10 | 72681874 A        | 8  | 0 G                   | 0.0003016  |
| rs139966141 | 10 | 72692502 A        | 7  | 0 G                   | 0.0008679  |
| rs201841370 | 10 | 73513906 C        | 8  | 0 CT                  | 0.0003016  |
| rs61853694  | 10 | 73604847 T        | 8  | 0 C                   | 0.0003016  |
| rs61853695  | 10 | 73610125 G        | 8  | 0 T                   | 0.0003016  |
| rs11593281  | 10 | 73636103 T        | 9  | 1 G                   | 0.0007194  |
| rs116994293 | 10 | 73637359 T        | 9  | 1 C                   | 0.0007194  |
| rs61852188  | 10 | 73667877 A        | 7  | 0 G                   | 0.0008679  |
| rs61852192  | 10 | 73681619 T        | 7  | 0 C                   | 0.0008679  |
| 10:78930285 | 10 | 78930285 C        | 8  | 0 CA                  | 0.0003016  |
| 10:78930287 | 10 | 78930287 G        | 8  | 0 GAGGTGAGGCTCCATCCCT | 0.0003016  |
| 10:78931156 | 10 | 78931156 T        | 10 | 0 TGC                 | 0.00003497 |
| 10:82833117 | 10 | 82833117 CTCCTTCT | 1  | 19 C                  | 0.0008417  |
| 10:83017314 | 10 | 83017314 C        | 5  | 31 T                  | 0.0003749  |
| rs11458432  | 10 | 83888508 G        | 23 | 14 GT                 | 0.0008216  |
| 10:85688069 | 10 | 85688069 A        | 36 | 31 T                  | 0.0005991  |
| 10:92049644 | 10 | 92049644 T        | 0  | 18 C                  | 0.0001312  |
| rs143771247 | 10 | 95295738 G        | 0  | 17 A                  | 0.0002606  |
| rs34828676  | 10 | 95815073 AT       | 22 | 11 A                  | 0.000217   |
| rs6583926   | 10 | 95844938 A        | 23 | 14 C                  | 0.0007414  |
| rs72811038  | 10 | 98008283 T        | 10 | 1 A                   | 0.0002681  |
| rs72811041  | 10 | 98012127 T        | 10 | 1 C                   | 0.0002681  |
| rs12570043  | 10 | 98052555 T        | 10 | 1 C                   | 0.0002681  |
| rs2253224   | 10 | 98933044 G        | 18 | 9 T                   | 0.0009279  |
| rs12572567  | 10 | 100991972 G       | 0  | 16 A                  | 0.0005465  |
| rs6584416   | 10 | 102918800 G       | 29 | 22 A                  | 0.0007063  |
| rs12771487  | 10 | 102924567 C       | 29 | 22 T                  | 0.0007063  |
| rs7082980   | 10 | 102934796 C       | 29 | 22 T                  | 0.0007063  |
| rs9325502   | 10 | 102951547 T       | 28 | 20 C                  | 0.0005398  |
| rs701839    | 10 | 102955294 A       | 28 | 20 G                  | 0.0005398  |
| rs7922128   | 10 | 108933871 C       | 0  | 16 T                  | 0.0005294  |
| rs7906243   | 10 | 108934196 A       | 0  | 16 G                  | 0.0005294  |
| rs12360219  | 10 | 108937557 T       | 0  | 16 C                  | 0.0005294  |
| rs11598667  | 10 | 108941739 T       | 0  | 16 C                  | 0.0005294  |

|             |    |                     |    |               |           |
|-------------|----|---------------------|----|---------------|-----------|
| rs12767990  | 10 | 108944867 G         | 0  | 16 A          | 0.0005294 |
| rs11193241  | 10 | 108948346 C         | 0  | 16 T          | 0.0005294 |
| rs17212285  | 10 | 108950581 G         | 0  | 16 A          | 0.0005294 |
| rs71484305  | 10 | 108952297 C         | 0  | 16 CCT        | 0.0005294 |
| rs10884432  | 10 | 108954666 T         | 0  | 16 C          | 0.0005294 |
| rs11193247  | 10 | 108960595 C         | 0  | 16 G          | 0.0005294 |
| rs11193248  | 10 | 108964544 T         | 0  | 16 C          | 0.0005294 |
| rs10884434  | 10 | 108965240 T         | 0  | 16 C          | 0.0005294 |
| rs10787015  | 10 | 108965600 C         | 0  | 16 G          | 0.0005294 |
| rs10884435  | 10 | 108965649 A         | 0  | 16 G          | 0.0005294 |
| rs10787016  | 10 | 108968432 A         | 0  | 16 C          | 0.0005294 |
| rs12358576  | 10 | 108969037 T         | 0  | 16 G          | 0.0005294 |
| rs11193253  | 10 | 108969714 T         | 0  | 16 C          | 0.0005294 |
| rs11193256  | 10 | 108973730 A         | 0  | 16 G          | 0.0005294 |
| rs10884438  | 10 | 108974359 A         | 0  | 16 G          | 0.0005294 |
| rs11193258  | 10 | 108975552 G         | 0  | 16 A          | 0.0005294 |
| rs12354523  | 10 | 108979345 T         | 0  | 16 C          | 0.0005294 |
| rs11193263  | 10 | 108985888 C         | 0  | 15 T          | 0.0005628 |
| rs34775254  | 10 | 108990471 T         | 0  | 15 C          | 0.0005628 |
| rs35107623  | 10 | 108990498 A         | 0  | 15 G          | 0.0005628 |
| rs12785180  | 10 | 108992940 T         | 0  | 15 C          | 0.0005628 |
| rs12255601  | 10 | 108993226 C         | 0  | 15 T          | 0.0005628 |
| rs12763192  | 10 | 108993310 A         | 0  | 15 T          | 0.0005628 |
| rs12359447  | 10 | 109001176 T         | 0  | 15 C          | 0.0005628 |
| rs11193273  | 10 | 109002111 G         | 0  | 15 C          | 0.0005628 |
| rs35241930  | 10 | 109002677 G         | 0  | 15 A          | 0.0005628 |
| rs11592478  | 10 | 109011053 C         | 0  | 15 G          | 0.0005628 |
| rs11193280  | 10 | 109011463 A         | 0  | 15 G          | 0.0005628 |
| rs12355630  | 10 | 109016725 T         | 0  | 15 C          | 0.0005628 |
| rs74856127  | 10 | 109028018 T         | 0  | 15 A          | 0.0005628 |
| rs12761509  | 10 | 109072456 T         | 0  | 16 G          | 0.0005294 |
| rs111719998 | 10 | 114941343 GGCTGAGCA | 8  | 37 G          | 0.0008686 |
| rs151592    | 10 | 115716300 A         | 24 | 15 G          | 0.0005235 |
| rs9421378   | 10 | 122201098 T         | 9  | 1 G           | 0.0006548 |
| rs9421379   | 10 | 122201104 C         | 9  | 1 A           | 0.0006548 |
| rs10829622  | 10 | 131519512 C         | 6  | 33 T          | 0.0009098 |
| rs34636064  | 10 | 131519968 C         | 6  | 33 T          | 0.0009098 |
| rs77183314  | 10 | 131520086 A         | 6  | 33 AGCATATTAG | 0.0009098 |
| rs10829623  | 10 | 131520689 C         | 6  | 33 T          | 0.0009098 |
| rs6482752   | 10 | 131524721 G         | 4  | 30 C          | 0.0002486 |
| rs13377140  | 10 | 131526249 T         | 4  | 30 A          | 0.0002486 |

|              |    |             |    |                      |           |
|--------------|----|-------------|----|----------------------|-----------|
| rs11592158   | 10 | 131526661 A | 4  | 30 G                 | 0.0002486 |
| rs7898934    | 10 | 131529320 T | 4  | 30 C                 | 0.0002486 |
| 10:131532754 | 10 | 131532754 G | 4  | 30 A                 | 0.0002486 |
| rs11595020   | 10 | 131536734 A | 4  | 30 G                 | 0.0002486 |
| rs11595599   | 10 | 131537580 A | 4  | 30 G                 | 0.0002486 |
| rs34523787   | 10 | 131802518 C | 4  | 28 T                 | 0.0008078 |
| rs7910987    | 10 | 131802999 T | 4  | 28 C                 | 0.0008078 |
| rs7087362    | 10 | 131803211 T | 4  | 28 C                 | 0.0008078 |
| rs35691464   | 10 | 131805107 T | 4  | 28 C                 | 0.0008078 |
| rs2388528    | 10 | 131805763 A | 4  | 28 G                 | 0.0008078 |
| 11:148028    | 11 | 148028 C    | 7  | 0 T                  | 0.0009566 |
| rs11601758   | 11 | 200801 T    | 7  | 0 G                  | 0.0008679 |
| rs11604736   | 11 | 200805 C    | 7  | 0 T                  | 0.0008679 |
| rs370095577  | 11 | 927257 T    | 20 | 10 G                 | 0.0005561 |
| rs76282688   | 11 | 4587440 G   | 0  | 16 A                 | 0.0005294 |
| rs16933455   | 11 | 7910939 C   | 7  | 0 T                  | 0.0008679 |
| rs17227935   | 11 | 8262750 C   | 25 | 15 T                 | 0.0002543 |
| rs34494077   | 11 | 8270544 A   | 26 | 15 T                 | 0.0001216 |
| rs1598165    | 11 | 8274248 A   | 26 | 18 G                 | 0.0007809 |
| rs11041827   | 11 | 8274699 T   | 15 | 53 C                 | 0.0003298 |
| rs4256972    | 11 | 8275004 T   | 15 | 53 C                 | 0.0003298 |
| rs11041828   | 11 | 8275294 T   | 15 | 53 C                 | 0.0003298 |
| rs4237770    | 11 | 8275835 C   | 15 | 53 T                 | 0.0003298 |
| rs369776490  | 11 | 8276156 T   | 15 | 53 TATGGTCCCTCCCCACC | 0.0003298 |
| rs373931277  | 11 | 8276174 A   | 15 | 53 AGGCTGGC          | 0.0003298 |
| rs149239827  | 11 | 8276184 T   | 15 | 53 TGG               | 0.0003298 |
| rs1454439    | 11 | 8276219 C   | 15 | 53 A                 | 0.0003298 |
| rs4758055    | 11 | 8277435 C   | 18 | 57 G                 | 0.0003261 |
| rs12802521   | 11 | 8277575 G   | 18 | 58 T                 | 0.000347  |
| rs12797411   | 11 | 8277594 G   | 18 | 59 A                 | 0.0001874 |
| rs71463719   | 11 | 8277624 G   | 38 | 33 A                 | 0.0001874 |
| rs11041830   | 11 | 8277807 A   | 38 | 33 C                 | 0.0001874 |
| rs3838787    | 11 | 8280679 CG  | 27 | 19 C                 | 0.0008555 |
| rs72852579   | 11 | 8282711 C   | 31 | 25 A                 | 0.0008555 |
| rs10833089   | 11 | 19310745 A  | 8  | 39 C                 | 0.0004628 |
| rs4423178    | 11 | 20626318 A  | 6  | 32 G                 | 0.00098   |
| rs2665704    | 11 | 22408655 G  | 11 | 44 A                 | 0.0007768 |
| rs2665705    | 11 | 22408803 T  | 11 | 44 C                 | 0.0007768 |
| rs721840     | 11 | 22411865 C  | 11 | 44 T                 | 0.0007768 |
| rs721841     | 11 | 22411969 C  | 11 | 44 G                 | 0.0007768 |
| rs2593649    | 11 | 22413033 T  | 11 | 44 C                 | 0.0007768 |

|             |    |             |    |                        |           |
|-------------|----|-------------|----|------------------------|-----------|
| rs2665712   | 11 | 22414861 C  | 11 | 44 G                   | 0.0007768 |
| rs2665713   | 11 | 22417107 A  | 11 | 44 G                   | 0.0007768 |
| rs1447504   | 11 | 22417712 A  | 11 | 44 T                   | 0.0007768 |
| rs726858    | 11 | 22418220 T  | 11 | 44 G                   | 0.0007768 |
| rs726859    | 11 | 22418570 A  | 11 | 44 G                   | 0.0007768 |
| rs2593651   | 11 | 22420611 G  | 11 | 44 A                   | 0.0007768 |
| rs2593652   | 11 | 22421015 T  | 11 | 44 C                   | 0.0007768 |
| rs2593653   | 11 | 22422503 G  | 10 | 44 C                   | 0.000219  |
| rs111974052 | 11 | 22423006 A  | 11 | 44 AATGACTATTTG        | 0.0007768 |
| rs2593657   | 11 | 22423166 T  | 11 | 44 C                   | 0.0007768 |
| rs35078276  | 11 | 22423689 C  | 11 | 44 T                   | 0.0007768 |
| rs34754498  | 11 | 22423691 G  | 11 | 44 T                   | 0.0007768 |
| rs34550272  | 11 | 22423693 C  | 11 | 44 T                   | 0.0007768 |
| rs4923000   | 11 | 22423752 A  | 11 | 44 C                   | 0.0007768 |
| rs2593660   | 11 | 22424782 C  | 11 | 45 A                   | 0.0004315 |
| rs5790261   | 11 | 22425340 TG | 10 | 44 T                   | 0.000219  |
| rs2593663   | 11 | 22428384 C  | 11 | 44 T                   | 0.0007768 |
| rs2665718   | 11 | 22428882 G  | 11 | 44 A                   | 0.0007768 |
| rs3106185   | 11 | 22435111 C  | 11 | 44 A                   | 0.0007768 |
| rs380241    | 11 | 22696692 T  | 14 | 5 C                    | 0.0008508 |
| rs380563    | 11 | 22701195 G  | 14 | 5 A                    | 0.0008508 |
| rs2928340   | 11 | 22703955 T  | 14 | 5 A                    | 0.0008508 |
| rs200967939 | 11 | 26518574 G  | 8  | 37 C                   | 0.0008686 |
| rs5020951   | 11 | 47610273 A  | 31 | 24 T                   | 0.0008755 |
| rs7936042   | 11 | 48344136 T  | 17 | 7 C                    | 0.0004382 |
| rs4450174   | 11 | 48345535 T  | 20 | 11 C                   | 0.0008202 |
| rs7395561   | 11 | 48359930 A  | 20 | 11 G                   | 0.0008202 |
| rs7396789   | 11 | 48359978 T  | 20 | 11 G                   | 0.0008202 |
| rs111349704 | 11 | 48361184 C  | 20 | 11 T                   | 0.0008202 |
| rs75036683  | 11 | 48361774 A  | 20 | 11 T                   | 0.0008202 |
| 11:49263077 | 11 | 49263077 A  | 17 | 7 ATATATGTATATATATGTAT | 0.0005099 |
| rs34701823  | 11 | 49263199 G  | 17 | 7 A                    | 0.0003336 |
| rs10839247  | 11 | 49284326 C  | 24 | 15 G                   | 0.0005235 |
| rs10839270  | 11 | 49387337 C  | 18 | 9 A                    | 0.0009279 |
| rs7113355   | 11 | 49394560 T  | 18 | 9 C                    | 0.0009279 |
| rs4297465   | 11 | 49397079 C  | 18 | 9 G                    | 0.0009279 |
| rs10839271  | 11 | 49398826 A  | 18 | 9 G                    | 0.0009279 |
| rs58025312  | 11 | 49400534 T  | 18 | 9 A                    | 0.0009279 |
| rs113728976 | 11 | 49405469 T  | 18 | 9 A                    | 0.0009279 |
| rs74462122  | 11 | 49405607 G  | 18 | 9 A                    | 0.0009279 |
| rs2091206   | 11 | 49407508 A  | 18 | 9 G                    | 0.0009279 |

|             |    |             |    |       |           |
|-------------|----|-------------|----|-------|-----------|
| rs10769576  | 11 | 49410203 A  | 18 | 9 G   | 0.0009279 |
| rs4109834   | 11 | 49413046 A  | 18 | 9 G   | 0.0009279 |
| rs12294396  | 11 | 49418158 G  | 18 | 9 T   | 0.0009279 |
| rs60691122  | 11 | 49424706 G  | 18 | 9 A   | 0.0009279 |
| rs56006436  | 11 | 49424902 T  | 18 | 9 G   | 0.0009279 |
| rs11040359  | 11 | 49437005 T  | 18 | 9 G   | 0.0009279 |
| rs7926211   | 11 | 49438332 T  | 19 | 9 C   | 0.0004395 |
| rs113869127 | 11 | 49443122 GA | 18 | 9 G   | 0.0009279 |
| rs35797587  | 11 | 49445135 GA | 18 | 9 G   | 0.0009279 |
| rs7118273   | 11 | 49446564 C  | 18 | 9 A   | 0.0009279 |
| rs11040364  | 11 | 49447342 T  | 18 | 9 C   | 0.0009279 |
| rs7358352   | 11 | 49447850 C  | 18 | 9 T   | 0.0009279 |
| rs7924702   | 11 | 49450356 C  | 18 | 9 A   | 0.0009279 |
| rs61278589  | 11 | 49450916 GT | 18 | 9 G   | 0.0009279 |
| rs10839279  | 11 | 49451370 C  | 18 | 9 G   | 0.0009279 |
| rs7108400   | 11 | 49456896 G  | 18 | 9 A   | 0.0009279 |
| rs7104119   | 11 | 49463162 G  | 18 | 9 A   | 0.0009279 |
| rs74237315  | 11 | 49464951 T  | 18 | 8 C   | 0.0006346 |
| rs11040375  | 11 | 49470089 A  | 18 | 9 T   | 0.0009279 |
| rs10839280  | 11 | 49481319 G  | 18 | 9 A   | 0.0009279 |
| rs78275063  | 11 | 49491771 C  | 18 | 9 T   | 0.0009279 |
| rs11040392  | 11 | 49505175 T  | 18 | 9 C   | 0.0009279 |
| rs10839288  | 11 | 49506590 G  | 18 | 9 C   | 0.0009279 |
| rs3862347   | 11 | 49517160 T  | 18 | 9 C   | 0.0009279 |
| rs28627422  | 11 | 49517955 T  | 18 | 9 C   | 0.0009279 |
| rs5791912   | 11 | 49519012 A  | 18 | 9 AT  | 0.0009279 |
| rs7931159   | 11 | 49521758 T  | 18 | 9 G   | 0.0009279 |
| rs7113589   | 11 | 49523244 C  | 18 | 9 G   | 0.0009279 |
| rs10839293  | 11 | 49525436 A  | 18 | 9 G   | 0.0009279 |
| rs148363829 | 11 | 49533795 C  | 18 | 9 CAT | 0.0009279 |
| rs7123475   | 11 | 49534164 G  | 18 | 9 T   | 0.0009279 |
| rs11040409  | 11 | 49535138 T  | 18 | 9 C   | 0.0009279 |
| rs75971566  | 11 | 49550581 A  | 18 | 9 G   | 0.0009279 |
| rs1827012   | 11 | 49555761 G  | 18 | 9 T   | 0.0009279 |
| rs10839298  | 11 | 49569382 A  | 19 | 9 G   | 0.0004395 |
| rs11040424  | 11 | 49573704 T  | 18 | 9 C   | 0.0009279 |
| rs10839300  | 11 | 49577519 T  | 18 | 9 A   | 0.0009279 |
| rs7108779   | 11 | 49582085 T  | 18 | 9 G   | 0.0009279 |
| rs10839303  | 11 | 49582462 T  | 18 | 9 G   | 0.0009279 |
| rs10769589  | 11 | 49582504 T  | 18 | 9 C   | 0.0009279 |
| rs10769590  | 11 | 49585158 C  | 18 | 9 A   | 0.0009279 |



|             |    |                 |    |              |            |
|-------------|----|-----------------|----|--------------|------------|
| rs11420458  | 11 | 49606837 TA     | 18 | 9 T          | 0.0009279  |
| rs28498099  | 11 | 49607490 C      | 18 | 9 T          | 0.0009279  |
| rs3974531   | 11 | 49610094 T      | 18 | 9 G          | 0.0009279  |
| rs10839308  | 11 | 49614443 A      | 18 | 9 G          | 0.0009279  |
| rs7925397   | 11 | 49615516 C      | 18 | 9 A          | 0.0009279  |
| rs7926115   | 11 | 49616011 G      | 18 | 9 C          | 0.0009279  |
| rs10769594  | 11 | 49616766 T      | 18 | 9 G          | 0.0009279  |
| rs7123089   | 11 | 49618468 T      | 18 | 9 C          | 0.0009279  |
| rs7117720   | 11 | 49629919 G      | 18 | 9 A          | 0.0009279  |
| rs28478434  | 11 | 49637858 C      | 18 | 9 T          | 0.0009279  |
| rs56397807  | 11 | 49650748 C      | 18 | 9 T          | 0.0009279  |
| rs11040454  | 11 | 49667123 C      | 18 | 9 T          | 0.0009279  |
| rs1508692   | 11 | 49670255 C      | 18 | 9 A          | 0.0009279  |
| rs12223469  | 11 | 49675012 T      | 18 | 9 C          | 0.0009279  |
| rs145099871 | 11 | 49684587 A      | 18 | 9 AAAGAGTGTG | 0.0009279  |
| rs10769602  | 11 | 49688172 T      | 18 | 9 A          | 0.0009279  |
| rs7107310   | 11 | 49690812 C      | 18 | 9 T          | 0.0009279  |
| rs6486003   | 11 | 49693773 A      | 18 | 9 T          | 0.0009279  |
| rs12224222  | 11 | 49699461 G      | 23 | 12 A         | 0.0002434  |
| rs75789447  | 11 | 49706844 A      | 23 | 12 G         | 0.0002434  |
| rs11040475  | 11 | 49709472 A      | 23 | 12 G         | 0.0002434  |
| rs111343904 | 11 | 49719799 AT     | 25 | 12 A         | 0.00003495 |
| rs10769606  | 11 | 49721909 T      | 25 | 13 C         | 0.0000842  |
| rs75884431  | 11 | 49723814 A      | 25 | 12 G         | 0.00003495 |
| rs6486007   | 11 | 49725128 A      | 25 | 12 G         | 0.00003495 |
| rs7934809   | 11 | 49729155 A      | 25 | 12 G         | 0.00003495 |
| rs200365936 | 11 | 49732793 A      | 25 | 12 T         | 0.00003495 |
| rs201030732 | 11 | 49732796 C      | 25 | 12 G         | 0.00003495 |
| rs202076125 | 11 | 49732797 C      | 25 | 12 CTTGTGGA  | 0.00003495 |
| rs202013769 | 11 | 49732805 C      | 25 | 12 A         | 0.00003495 |
| rs11040486  | 11 | 49734673 A      | 25 | 12 C         | 0.00003495 |
| rs200584985 | 11 | 49738321 T      | 25 | 12 TG        | 0.00003495 |
| 11:49738324 | 11 | 49738324 A      | 25 | 12 AT        | 0.00003495 |
| 11:49738328 | 11 | 49738328 C      | 25 | 12 CT        | 0.00003495 |
| 11:49738330 | 11 | 49738330 CTAGAA | 25 | 12 C         | 0.00003495 |
| 11:49738332 | 11 | 49738332 A      | 25 | 12 C         | 0.00003495 |
| rs10839344  | 11 | 49745879 T      | 25 | 12 C         | 0.00003495 |
| rs7478971   | 11 | 49747444 C      | 25 | 12 T         | 0.00003495 |
| rs201448975 | 11 | 49750010 G      | 25 | 12 A         | 0.00003495 |
| rs11040495  | 11 | 49751202 G      | 25 | 12 A         | 0.00003495 |
| rs9735717   | 11 | 49752014 T      | 20 | 10 G         | 0.0005977  |

|             |    |            |    |       |            |
|-------------|----|------------|----|-------|------------|
| rs11040502  | 11 | 49754372 G | 25 | 12 A  | 0.00003495 |
| rs10839350  | 11 | 49755815 C | 25 | 12 T  | 0.00003495 |
| rs11040503  | 11 | 49760350 A | 25 | 13 C  | 0.0001716  |
| rs10839355  | 11 | 49764142 A | 23 | 12 G  | 0.0002434  |
| rs7929466   | 11 | 49764501 T | 23 | 12 C  | 0.0002434  |
| rs7930031   | 11 | 49764744 A | 23 | 12 G  | 0.0002434  |
| rs7940219   | 11 | 49769264 C | 23 | 12 T  | 0.0002434  |
| rs10839357  | 11 | 49769993 A | 23 | 12 G  | 0.0002434  |
| rs7126006   | 11 | 49770456 G | 23 | 12 T  | 0.0002434  |
| rs7342231   | 11 | 49772761 G | 22 | 11 A  | 0.0001874  |
| rs11040511  | 11 | 49775247 T | 23 | 12 A  | 0.0002434  |
| rs76075584  | 11 | 49776343 C | 23 | 12 CT | 0.0002434  |
| rs9633834   | 11 | 49780784 G | 23 | 12 T  | 0.0002434  |
| rs7938664   | 11 | 49784497 G | 23 | 12 A  | 0.0002434  |
| rs7943827   | 11 | 49786202 A | 23 | 12 G  | 0.0002434  |
| rs7928365   | 11 | 49790540 A | 23 | 12 T  | 0.0002434  |
| rs7926022   | 11 | 49793884 A | 23 | 12 G  | 0.0002434  |
| rs11040520  | 11 | 49797641 A | 22 | 10 G  | 0.00005982 |
| rs200455225 | 11 | 49798676 T | 23 | 12 C  | 0.0002434  |
| rs200690573 | 11 | 49799511 A | 20 | 10 G  | 0.0005561  |
| rs10839373  | 11 | 49802697 G | 23 | 12 C  | 0.0002434  |
| rs10839374  | 11 | 49802707 C | 23 | 12 T  | 0.0002434  |
| rs10839376  | 11 | 49802835 A | 23 | 12 T  | 0.0002434  |
| rs12225361  | 11 | 49811416 C | 23 | 12 T  | 0.0002434  |
| rs368958306 | 11 | 49819744 T | 24 | 12 G  | 0.00006466 |
| rs11040544  | 11 | 49821636 T | 23 | 12 G  | 0.0002434  |
| rs7937581   | 11 | 49824449 G | 23 | 12 A  | 0.0002434  |
| rs7115159   | 11 | 49829781 A | 23 | 12 G  | 0.0002434  |
| rs3974371   | 11 | 49837553 A | 22 | 12 G  | 0.000477   |
| rs3974437   | 11 | 49838800 C | 23 | 12 T  | 0.0002434  |
| rs3974438   | 11 | 49838802 C | 23 | 12 G  | 0.0002434  |
| rs7927743   | 11 | 49839800 A | 23 | 12 G  | 0.0002434  |
| rs11828963  | 11 | 49840036 C | 23 | 12 G  | 0.0002434  |
| rs7113158   | 11 | 49841717 T | 23 | 12 C  | 0.0002434  |
| rs7121847   | 11 | 49843560 A | 23 | 12 G  | 0.0002434  |
| rs7122262   | 11 | 49844121 T | 23 | 13 C  | 0.0003278  |
| rs10839393  | 11 | 49844505 T | 21 | 12 G  | 0.0009318  |
| rs7130289   | 11 | 49845685 T | 23 | 12 C  | 0.0002434  |
| rs7120100   | 11 | 49848506 C | 23 | 12 A  | 0.0002434  |
| rs7929167   | 11 | 49857885 C | 23 | 12 G  | 0.0002434  |
| rs10839398  | 11 | 49860044 G | 23 | 12 A  | 0.0002434  |

|             |    |            |    |       |            |
|-------------|----|------------|----|-------|------------|
| rs11040588  | 11 | 49860762 A | 23 | 12 G  | 0.0002434  |
| rs11040591  | 11 | 49864459 A | 23 | 12 G  | 0.0002434  |
| rs7932861   | 11 | 49865897 A | 23 | 12 G  | 0.0002434  |
| rs10160231  | 11 | 49866908 C | 23 | 12 T  | 0.0002434  |
| rs10160234  | 11 | 49867055 C | 23 | 12 T  | 0.0002434  |
| rs7925690   | 11 | 49872449 G | 23 | 12 T  | 0.0002434  |
| rs28580349  | 11 | 49873632 G | 23 | 12 C  | 0.0002434  |
| rs12222826  | 11 | 49873758 A | 23 | 11 G  | 0.00008787 |
| rs10839400  | 11 | 49874567 A | 23 | 12 G  | 0.0002434  |
| rs7130010   | 11 | 49875570 G | 23 | 12 C  | 0.0002434  |
| rs7130624   | 11 | 49875845 A | 23 | 12 G  | 0.0002434  |
| rs7395782   | 11 | 49878353 C | 23 | 12 G  | 0.0002434  |
| rs7925632   | 11 | 49878419 A | 23 | 12 T  | 0.0002434  |
| rs7926023   | 11 | 49881879 T | 23 | 12 C  | 0.0002434  |
| rs10769629  | 11 | 49882682 A | 23 | 12 G  | 0.0002539  |
| rs73466972  | 11 | 49884317 T | 23 | 12 G  | 0.0002434  |
| rs10839410  | 11 | 49884692 A | 23 | 12 G  | 0.0002434  |
| rs10839411  | 11 | 49886623 A | 23 | 12 G  | 0.0002434  |
| rs10839412  | 11 | 49886667 G | 23 | 12 A  | 0.0002434  |
| rs200523127 | 11 | 49896280 A | 23 | 12 G  | 0.0002434  |
| rs7947702   | 11 | 49897846 T | 23 | 12 C  | 0.0002434  |
| rs11040614  | 11 | 49898849 T | 23 | 12 C  | 0.0002434  |
| rs12270672  | 11 | 49900067 T | 23 | 12 C  | 0.0002434  |
| rs10839421  | 11 | 49900489 C | 23 | 12 G  | 0.0002434  |
| rs10839423  | 11 | 49901708 G | 23 | 12 T  | 0.0002434  |
| rs73467002  | 11 | 49905020 G | 23 | 12 A  | 0.0002434  |
| rs10839427  | 11 | 49905764 G | 23 | 12 C  | 0.0002434  |
| rs145109916 | 11 | 49908519 T | 23 | 12 G  | 0.0002434  |
| rs12284792  | 11 | 49909416 G | 23 | 12 T  | 0.0002434  |
| rs60299751  | 11 | 49911267 G | 23 | 12 A  | 0.0002434  |
| rs56258327  | 11 | 49911401 T | 23 | 12 A  | 0.0002434  |
| rs7121372   | 11 | 49914210 C | 23 | 12 G  | 0.0002434  |
| rs7937552   | 11 | 49916242 C | 23 | 12 T  | 0.0002434  |
| rs10734604  | 11 | 49923034 T | 22 | 11 C  | 0.0001529  |
| rs2003143   | 11 | 49923509 T | 23 | 12 C  | 0.0002434  |
| rs2003144   | 11 | 49923744 T | 23 | 12 C  | 0.0002434  |
| rs10742956  | 11 | 49925909 A | 23 | 12 G  | 0.0002434  |
| rs57549473  | 11 | 49930116 T | 23 | 12 TA | 0.0002434  |
| rs11040645  | 11 | 49933282 A | 23 | 12 C  | 0.0002434  |
| rs10839447  | 11 | 49934353 C | 23 | 12 T  | 0.0002434  |
| rs9705134   | 11 | 49934901 A | 23 | 12 G  | 0.0002434  |

|             |    |             |    |       |            |
|-------------|----|-------------|----|-------|------------|
| rs10734605  | 11 | 49936323 A  | 23 | 12 T  | 0.0002434  |
| rs4474434   | 11 | 49936666 G  | 23 | 12 A  | 0.0002434  |
| rs4628673   | 11 | 49937579 C  | 23 | 12 A  | 0.0002434  |
| rs7125437   | 11 | 49937971 C  | 23 | 12 T  | 0.0002434  |
| rs6486038   | 11 | 49946299 T  | 23 | 12 C  | 0.0002434  |
| rs4109780   | 11 | 49948091 T  | 23 | 12 C  | 0.0002434  |
| rs10734607  | 11 | 49950098 C  | 23 | 12 A  | 0.0002434  |
| rs10742959  | 11 | 49956951 A  | 23 | 12 T  | 0.0002434  |
| rs10742960  | 11 | 49956953 G  | 23 | 12 C  | 0.0002434  |
| rs6486041   | 11 | 49962843 A  | 23 | 12 G  | 0.0002434  |
| rs7129763   | 11 | 49969219 C  | 23 | 12 T  | 0.0002434  |
| rs7102734   | 11 | 49969469 C  | 23 | 12 A  | 0.0002434  |
| rs7102618   | 11 | 49969473 A  | 23 | 12 G  | 0.0002434  |
| rs11040675  | 11 | 49969615 T  | 23 | 12 C  | 0.0002434  |
| rs11601773  | 11 | 49978958 C  | 23 | 12 A  | 0.0001164  |
| rs10839466  | 11 | 49981669 A  | 23 | 12 G  | 0.0002434  |
| rs1818888   | 11 | 49987537 T  | 23 | 12 C  | 0.0002434  |
| rs4378400   | 11 | 49993317 C  | 23 | 13 A  | 0.0003278  |
| rs7483015   | 11 | 49998023 A  | 22 | 12 G  | 0.000477   |
| rs10769647  | 11 | 50002275 T  | 23 | 12 C  | 0.0002434  |
| rs66513186  | 11 | 50006407 T  | 23 | 12 TA | 0.0002434  |
| rs10742963  | 11 | 50010007 G  | 23 | 12 T  | 0.0002434  |
| rs4242812   | 11 | 50010908 C  | 23 | 12 T  | 0.0002434  |
| rs7483824   | 11 | 50024530 T  | 23 | 12 C  | 0.0002434  |
| rs4264152   | 11 | 50025257 T  | 23 | 12 C  | 0.0002434  |
| rs10769649  | 11 | 50028341 T  | 23 | 12 A  | 0.0002434  |
| rs7125112   | 11 | 50032877 A  | 23 | 12 G  | 0.0002434  |
| rs4509737   | 11 | 50033896 T  | 23 | 12 A  | 0.0002434  |
| rs28862975  | 11 | 50044480 A  | 23 | 12 G  | 0.0002434  |
| rs28616719  | 11 | 50048663 T  | 24 | 12 G  | 0.00006466 |
| rs28491498  | 11 | 50052422 A  | 23 | 12 T  | 0.0002434  |
| rs28452864  | 11 | 50055245 G  | 23 | 12 A  | 0.0002434  |
| rs7106938   | 11 | 50062925 A  | 23 | 12 T  | 0.0002434  |
| rs200652008 | 11 | 50064702 CA | 22 | 11 C  | 0.0001874  |
| rs7939285   | 11 | 50065753 A  | 23 | 12 G  | 0.0002434  |
| rs12224327  | 11 | 50068838 T  | 23 | 12 C  | 0.0002434  |
| rs1390677   | 11 | 50070332 T  | 23 | 12 G  | 0.0002434  |
| rs202088682 | 11 | 50093897 A  | 21 | 10 G  | 0.000281   |
| rs7932015   | 11 | 50094879 T  | 23 | 12 C  | 0.0002434  |
| rs2201636   | 11 | 50095742 T  | 23 | 12 G  | 0.0002434  |
| rs28651975  | 11 | 50096293 T  | 23 | 12 C  | 0.0002434  |

|             |    |                |    |           |            |
|-------------|----|----------------|----|-----------|------------|
| rs12273546  | 11 | 50101348 T     | 23 | 12 G      | 0.0002434  |
| rs4082585   | 11 | 50104726 T     | 23 | 12 G      | 0.0002434  |
| rs12282428  | 11 | 50105543 A     | 23 | 12 G      | 0.0002434  |
| rs10901984  | 11 | 50105783 G     | 23 | 12 A      | 0.0002434  |
| rs7104310   | 11 | 50106409 T     | 23 | 12 C      | 0.0002434  |
| rs7101532   | 11 | 50106487 G     | 23 | 12 A      | 0.0002434  |
| rs6597938   | 11 | 50108289 G     | 23 | 12 C      | 0.0002434  |
| rs7944772   | 11 | 50111674 T     | 23 | 12 A      | 0.0002434  |
| rs4551759   | 11 | 50112158 T     | 23 | 12 C      | 0.0002434  |
| rs11245791  | 11 | 50114708 G     | 23 | 12 A      | 0.0002434  |
| rs6597940   | 11 | 50116278 C     | 23 | 12 T      | 0.0002434  |
| rs1845858   | 11 | 50116583 A     | 23 | 12 G      | 0.0002434  |
| rs1496467   | 11 | 50117620 C     | 23 | 12 T      | 0.0002434  |
| rs7119707   | 11 | 50118197 C     | 23 | 12 T      | 0.0002434  |
| rs12223378  | 11 | 50119077 C     | 23 | 12 T      | 0.0002434  |
| rs7949346   | 11 | 50122862 C     | 23 | 12 G      | 0.0002434  |
| rs7129932   | 11 | 50125428 C     | 23 | 12 A      | 0.0002434  |
| rs7938918   | 11 | 50128413 C     | 23 | 12 A      | 0.0002434  |
| rs7104653   | 11 | 50129598 A     | 23 | 12 G      | 0.0002434  |
| rs74603331  | 11 | 50130690 A     | 23 | 12 ATATAT | 0.0002434  |
| rs7939306   | 11 | 50132363 T     | 23 | 12 C      | 0.0002434  |
| rs10902066  | 11 | 50134037 G     | 23 | 12 C      | 0.0002434  |
| rs11245902  | 11 | 50137461 A     | 23 | 12 G      | 0.0002434  |
| rs7119765   | 11 | 50141419 T     | 23 | 12 A      | 0.0002434  |
| rs7115169   | 11 | 50143774 T     | 23 | 12 C      | 0.0002434  |
| rs112916529 | 11 | 50145989 TGAC  | 23 | 12 T      | 0.0002434  |
| rs2006896   | 11 | 50147183 A     | 23 | 12 G      | 0.0002434  |
| rs7935868   | 11 | 50148729 T     | 23 | 12 C      | 0.0002434  |
| rs10794275  | 11 | 50154408 A     | 23 | 12 G      | 0.0002434  |
| rs10902071  | 11 | 50154754 G     | 23 | 12 A      | 0.0002434  |
| rs11245915  | 11 | 50155636 C     | 23 | 12 G      | 0.0002434  |
| rs10901885  | 11 | 50165376 A     | 23 | 12 G      | 0.0002434  |
| rs6597888   | 11 | 50166161 A     | 23 | 11 G      | 0.00009985 |
| rs10794212  | 11 | 50171877 C     | 23 | 12 T      | 0.0002434  |
| rs7951692   | 11 | 50175386 T     | 23 | 12 C      | 0.0002434  |
| rs12271034  | 11 | 50179838 G     | 23 | 12 A      | 0.0002434  |
| rs139099319 | 11 | 50180779 CTTAT | 23 | 12 C      | 0.0002434  |
| rs36104516  | 11 | 50187374 C     | 23 | 12 CA     | 0.0002434  |
| rs7945981   | 11 | 50189879 G     | 24 | 11 A      | 0.00002041 |
| rs12281164  | 11 | 50192243 T     | 23 | 12 C      | 0.0002434  |
| rs78067132  | 11 | 50200440 A     | 23 | 12 G      | 0.0002434  |

|             |    |             |    |         |            |
|-------------|----|-------------|----|---------|------------|
| rs7117400   | 11 | 50204466 A  | 23 | 12 G    | 0.0002434  |
| rs6597891   | 11 | 50205579 G  | 23 | 12 A    | 0.0002434  |
| rs6597892   | 11 | 50206408 A  | 23 | 12 G    | 0.0002434  |
| rs7129988   | 11 | 50208668 T  | 23 | 12 A    | 0.0002434  |
| rs12270832  | 11 | 50209577 T  | 23 | 12 A    | 0.0002434  |
| rs61317280  | 11 | 50210996 G  | 23 | 12 C    | 0.0002434  |
| rs12274911  | 11 | 50212299 G  | 24 | 12 A    | 0.00006466 |
| rs12276637  | 11 | 50212313 A  | 24 | 12 T    | 0.00006466 |
| rs10794216  | 11 | 50216041 T  | 23 | 12 G    | 0.0002434  |
| rs7941169   | 11 | 50217658 C  | 23 | 12 T    | 0.0002434  |
| rs1826833   | 11 | 50219823 T  | 23 | 12 C    | 0.0002434  |
| rs7952693   | 11 | 50225493 A  | 23 | 12 G    | 0.0002434  |
| rs7926715   | 11 | 50228759 T  | 23 | 12 C    | 0.0002434  |
| rs10901906  | 11 | 50229266 C  | 23 | 12 T    | 0.0002434  |
| rs6597897   | 11 | 50229835 A  | 23 | 12 T    | 0.0002434  |
| rs7126773   | 11 | 50229982 A  | 23 | 12 G    | 0.0002434  |
| rs12292034  | 11 | 50231436 C  | 23 | 12 A    | 0.0002434  |
| rs76509416  | 11 | 50232059 A  | 23 | 12 G    | 0.0002434  |
| rs143260220 | 11 | 50233427 AC | 23 | 12 A    | 0.0002434  |
| rs7101625   | 11 | 50248534 A  | 23 | 12 G    | 0.0002434  |
| rs7102961   | 11 | 50252272 G  | 23 | 12 A    | 0.0002434  |
| rs80243738  | 11 | 50253401 A  | 23 | 14 ATTC | 0.0007414  |
| rs3829060   | 11 | 50257732 C  | 23 | 12 T    | 0.0002434  |
| rs12222099  | 11 | 50260871 A  | 23 | 12 G    | 0.0002434  |
| rs6597899   | 11 | 50262926 G  | 23 | 12 A    | 0.0002434  |
| rs12224914  | 11 | 50270503 T  | 23 | 12 C    | 0.0002434  |
| rs148166088 | 11 | 50272145 T  | 18 | 9 C     | 0.0009279  |
| rs11245630  | 11 | 50279053 A  | 23 | 12 G    | 0.0002434  |
| rs11245631  | 11 | 50279561 T  | 24 | 14 C    | 0.0003806  |
| rs10901911  | 11 | 50282774 T  | 23 | 12 C    | 0.0002434  |
| rs7101411   | 11 | 50289225 C  | 23 | 12 G    | 0.0002434  |
| rs7943523   | 11 | 50295566 C  | 23 | 12 T    | 0.0002434  |
| rs4111483   | 11 | 50298232 G  | 23 | 12 A    | 0.0002434  |
| rs7104183   | 11 | 50302343 A  | 23 | 12 G    | 0.0002434  |
| rs199523190 | 11 | 50304508 GT | 21 | 11 G    | 0.0003953  |
| rs11502001  | 11 | 50324829 A  | 23 | 12 G    | 0.0002434  |
| rs3904258   | 11 | 50327748 A  | 23 | 12 T    | 0.0002434  |
| rs7938813   | 11 | 50328033 A  | 23 | 12 G    | 0.0002434  |
| rs3904274   | 11 | 50329862 A  | 23 | 12 G    | 0.0002434  |
| rs56258046  | 11 | 50331203 A  | 23 | 12 T    | 0.0002434  |
| rs7942986   | 11 | 50331809 C  | 23 | 12 A    | 0.0002434  |

|             |    |             |    |          |            |
|-------------|----|-------------|----|----------|------------|
| rs11502003  | 11 | 50341483 A  | 23 | 12 G     | 0.0002434  |
| rs11502004  | 11 | 50341671 A  | 23 | 12 G     | 0.0002434  |
| rs61319414  | 11 | 50345819 A  | 23 | 12 C     | 0.0002434  |
| rs77639753  | 11 | 50347898 A  | 23 | 12 T     | 0.0002434  |
| rs11530897  | 11 | 50348489 G  | 23 | 12 A     | 0.0002434  |
| rs12273168  | 11 | 50350886 T  | 23 | 12 G     | 0.0002434  |
| rs7117501   | 11 | 50352564 A  | 23 | 12 G     | 0.0002434  |
| rs7480651   | 11 | 50355829 G  | 23 | 13 C     | 0.0003278  |
| rs4097537   | 11 | 50359470 A  | 23 | 13 G     | 0.0003278  |
| rs7130223   | 11 | 50361056 C  | 23 | 13 T     | 0.0003278  |
| rs7120506   | 11 | 50361085 T  | 23 | 13 C     | 0.0003278  |
| rs12274688  | 11 | 50362077 T  | 23 | 13 G     | 0.0003278  |
| rs3912710   | 11 | 50364862 T  | 18 | 9 C      | 0.0009279  |
| rs7483219   | 11 | 50365404 A  | 23 | 13 G     | 0.0003278  |
| rs7483817   | 11 | 50365440 A  | 23 | 13 G     | 0.0003278  |
| rs11245655  | 11 | 50371570 T  | 23 | 12 C     | 0.0002434  |
| rs3866801   | 11 | 50374138 G  | 23 | 12 A     | 0.0002434  |
| rs11245661  | 11 | 50386489 T  | 23 | 12 A     | 0.0002434  |
| rs11245662  | 11 | 50388103 G  | 23 | 12 A     | 0.0002434  |
| rs7293950   | 11 | 50392698 T  | 23 | 12 A     | 0.0002434  |
| rs8189401   | 11 | 50395952 A  | 23 | 12 G     | 0.0002434  |
| rs79147867  | 11 | 50400993 GT | 23 | 12 G     | 0.0002434  |
| rs8189134   | 11 | 50407583 T  | 23 | 12 C     | 0.0002434  |
| rs12288415  | 11 | 50409948 A  | 23 | 12 G     | 0.0002434  |
| rs12293696  | 11 | 50412498 A  | 23 | 12 G     | 0.0002434  |
| rs113829766 | 11 | 50418356 A  | 23 | 12 T     | 0.0002434  |
| rs7938137   | 11 | 50424591 C  | 23 | 12 T     | 0.0002434  |
| rs7933409   | 11 | 50434166 A  | 24 | 12 G     | 0.00006466 |
| rs11537283  | 11 | 50437542 G  | 23 | 12 C     | 0.0002434  |
| rs2313609   | 11 | 50439113 A  | 21 | 12 C     | 0.0009318  |
| rs113944228 | 11 | 50441095 A  | 21 | 12 ATTTC | 0.0009318  |
| rs6597926   | 11 | 50444220 C  | 23 | 12 T     | 0.0002434  |
| rs11245689  | 11 | 50451116 A  | 21 | 12 G     | 0.0009318  |
| rs11245692  | 11 | 50451337 T  | 21 | 12 G     | 0.0009318  |
| rs10901952  | 11 | 50452283 C  | 23 | 12 A     | 0.0002434  |
| rs77340754  | 11 | 50453047 A  | 21 | 12 C     | 0.0009318  |
| rs73470296  | 11 | 50455067 T  | 21 | 12 A     | 0.0009318  |
| rs12422197  | 11 | 50456487 T  | 21 | 12 C     | 0.0009318  |
| rs113623252 | 11 | 50457940 T  | 21 | 12 A     | 0.0009318  |
| rs11533317  | 11 | 50458825 C  | 23 | 12 T     | 0.0002434  |
| rs10901955  | 11 | 50459288 C  | 23 | 12 T     | 0.0002434  |

|            |    |            |    |       |           |
|------------|----|------------|----|-------|-----------|
| rs7293940  | 11 | 50459908 C | 21 | 12 G  | 0.0009318 |
| rs11245700 | 11 | 50460517 T | 23 | 12 C  | 0.0002539 |
| rs11245702 | 11 | 50462967 C | 21 | 12 T  | 0.0009318 |
| rs7294136  | 11 | 50464201 C | 23 | 12 G  | 0.0002434 |
| rs8189003  | 11 | 50465834 A | 21 | 12 C  | 0.0009318 |
| rs75618991 | 11 | 50468157 A | 21 | 12 AC | 0.0009318 |
| rs1589629  | 11 | 50474459 T | 21 | 12 C  | 0.0009318 |
| rs7294276  | 11 | 50475856 T | 21 | 12 C  | 0.0009318 |
| rs11532134 | 11 | 50483601 A | 21 | 12 G  | 0.0009318 |
| rs10901963 | 11 | 50488853 T | 21 | 12 C  | 0.0009318 |
| rs1608272  | 11 | 50490256 A | 21 | 12 T  | 0.0009318 |
| rs10901965 | 11 | 50496188 T | 21 | 12 C  | 0.0009318 |
| rs7947077  | 11 | 50497585 T | 21 | 12 C  | 0.0009318 |
| rs12282218 | 11 | 50498647 T | 23 | 12 C  | 0.0002434 |
| rs1608276  | 11 | 50503949 A | 21 | 12 G  | 0.0009318 |
| rs11245732 | 11 | 50507774 A | 21 | 12 C  | 0.0009318 |
| rs11825447 | 11 | 50508744 A | 21 | 12 G  | 0.0009318 |
| rs4631910  | 11 | 50510243 T | 21 | 12 C  | 0.0009318 |
| rs2204185  | 11 | 50510403 G | 21 | 12 T  | 0.0009318 |
| rs11245735 | 11 | 50513030 G | 21 | 12 T  | 0.0009318 |
| rs2313661  | 11 | 50513441 C | 21 | 12 G  | 0.0009318 |
| rs7294023  | 11 | 50513544 T | 21 | 12 C  | 0.0009318 |
| rs12275650 | 11 | 50517487 C | 21 | 12 T  | 0.0009318 |
| rs10794249 | 11 | 50519296 C | 21 | 12 A  | 0.0009318 |
| rs10901970 | 11 | 50520259 C | 21 | 12 A  | 0.0009318 |
| rs8189234  | 11 | 50526569 T | 21 | 12 C  | 0.0009318 |
| rs11245749 | 11 | 50540697 G | 21 | 12 A  | 0.0009318 |
| rs8189030  | 11 | 50543925 T | 21 | 12 C  | 0.0009318 |
| rs8186351  | 11 | 50544072 A | 21 | 12 G  | 0.0009318 |
| rs4472965  | 11 | 50547599 C | 21 | 12 G  | 0.0009318 |
| rs11245754 | 11 | 50548882 C | 21 | 12 T  | 0.0009318 |
| rs11535886 | 11 | 50558437 G | 22 | 12 A  | 0.000477  |
| rs7293930  | 11 | 50562142 C | 21 | 12 T  | 0.0009318 |
| rs8189213  | 11 | 50566719 T | 21 | 12 C  | 0.0009318 |
| rs11537269 | 11 | 50577906 G | 21 | 12 T  | 0.0009318 |
| rs8186556  | 11 | 50579584 A | 23 | 12 C  | 0.0002539 |
| rs59058603 | 11 | 50581369 C | 21 | 12 CT | 0.0009318 |
| rs11245773 | 11 | 50582317 G | 21 | 12 C  | 0.0009318 |
| rs60441611 | 11 | 50582908 A | 21 | 12 C  | 0.0009318 |
| rs1592602  | 11 | 50602567 C | 22 | 13 T  | 0.0006749 |
| rs1833272  | 11 | 50602940 C | 22 | 13 A  | 0.0006749 |



|             |    |            |    |         |           |
|-------------|----|------------|----|---------|-----------|
| rs12272441  | 11 | 50605469 T | 21 | 12 C    | 0.0009318 |
| rs3919555   | 11 | 50620415 T | 22 | 12 G    | 0.000477  |
| rs111766585 | 11 | 50620511 C | 21 | 12 CA   | 0.0009318 |
| rs1118132   | 11 | 50621548 T | 21 | 12 C    | 0.0009318 |
| rs1833261   | 11 | 50629395 G | 21 | 12 A    | 0.0009318 |
| rs12287190  | 11 | 50631738 T | 21 | 12 C    | 0.0009318 |
| rs11245790  | 11 | 50638617 T | 21 | 12 G    | 0.0009318 |
| rs4980483   | 11 | 50649709 T | 21 | 12 C    | 0.0009318 |
| rs4980456   | 11 | 50650534 T | 21 | 12 C    | 0.0009318 |
| rs2872642   | 11 | 50652890 G | 21 | 12 A    | 0.0009318 |
| rs11245798  | 11 | 50653895 A | 21 | 12 G    | 0.0009318 |
| rs7294275   | 11 | 50653980 T | 21 | 12 C    | 0.0009318 |
| rs11245799  | 11 | 50654134 T | 21 | 12 C    | 0.0009318 |
| rs10902019  | 11 | 50654339 A | 21 | 12 G    | 0.0009318 |
| rs11561033  | 11 | 50657803 C | 21 | 12 G    | 0.0009318 |
| rs144300519 | 11 | 50658518 A | 21 | 12 AT   | 0.0009318 |
| rs10431185  | 11 | 50659828 C | 21 | 12 T    | 0.0009318 |
| rs11245809  | 11 | 50663560 T | 21 | 12 C    | 0.0009318 |
| rs2313933   | 11 | 50667351 T | 21 | 12 C    | 0.0009318 |
| rs11823709  | 11 | 50668546 T | 21 | 12 C    | 0.0009318 |
| rs111910431 | 11 | 50670939 C | 21 | 12 CAA  | 0.0009318 |
| rs7294196   | 11 | 50670949 A | 21 | 12 G    | 0.0009318 |
| rs142814862 | 11 | 50682185 A | 21 | 12 ATTG | 0.0009318 |
| rs2216276   | 11 | 50685730 A | 21 | 12 G    | 0.0009318 |
| rs7294008   | 11 | 50687904 G | 21 | 12 A    | 0.0009318 |
| rs8188960   | 11 | 50688586 T | 21 | 12 C    | 0.0009318 |
| rs8188971   | 11 | 50696175 A | 23 | 12 C    | 0.0002539 |
| rs8189359   | 11 | 50699030 A | 23 | 12 C    | 0.0002539 |
| rs73468069  | 11 | 50708031 A | 21 | 12 C    | 0.0009318 |
| rs12288231  | 11 | 50708208 T | 21 | 12 C    | 0.0009318 |
| rs111348362 | 11 | 50708654 C | 21 | 12 CTG  | 0.0009318 |
| rs7294286   | 11 | 50710459 T | 21 | 12 A    | 0.0009318 |
| rs7925215   | 11 | 50727606 A | 21 | 12 T    | 0.0009318 |
| rs11501991  | 11 | 50732728 A | 21 | 12 T    | 0.0009318 |
| rs7944041   | 11 | 50734530 G | 21 | 12 C    | 0.0009318 |
| rs34813929  | 11 | 50738430 A | 21 | 12 AT   | 0.0009318 |
| rs11245860  | 11 | 50740226 T | 21 | 12 C    | 0.0008432 |
| rs11245864  | 11 | 50748677 A | 21 | 12 G    | 0.0009318 |
| rs10902053  | 11 | 50751880 C | 22 | 12 T    | 0.000477  |
| rs11245872  | 11 | 50752748 G | 22 | 12 T    | 0.000477  |
| rs11245875  | 11 | 50754477 A | 22 | 12 G    | 0.000477  |

|             |    |             |    |       |           |
|-------------|----|-------------|----|-------|-----------|
| rs11245876  | 11 | 50755041 T  | 22 | 12 C  | 0.000477  |
| rs11245878  | 11 | 50756950 C  | 22 | 12 T  | 0.000477  |
| rs7293994   | 11 | 50757564 C  | 22 | 12 A  | 0.000477  |
| rs9634039   | 11 | 50761263 T  | 21 | 12 C  | 0.0009318 |
| rs61657582  | 11 | 50762942 CT | 21 | 12 C  | 0.0009318 |
| rs11245880  | 11 | 50764078 A  | 21 | 12 G  | 0.0009318 |
| rs10902061  | 11 | 50766866 T  | 21 | 12 A  | 0.0009318 |
| rs8189341   | 11 | 50769125 A  | 21 | 12 C  | 0.0009318 |
| rs11533307  | 11 | 50773906 T  | 21 | 12 C  | 0.0009318 |
| rs11561040  | 11 | 50774090 C  | 21 | 12 G  | 0.0009318 |
| rs11245891  | 11 | 50774654 T  | 21 | 12 G  | 0.0009318 |
| rs193019049 | 11 | 50777681 G  | 21 | 12 A  | 0.0009318 |
| rs12293802  | 11 | 50779877 T  | 21 | 12 A  | 0.0009318 |
| rs10902323  | 11 | 51313521 A  | 21 | 12 C  | 0.0009318 |
| rs1603755   | 11 | 51314373 G  | 21 | 12 C  | 0.0009318 |
| rs10902325  | 11 | 51323008 C  | 21 | 12 A  | 0.0009318 |
| rs10902328  | 11 | 51327845 C  | 21 | 12 G  | 0.0009318 |
| rs7294263   | 11 | 51339825 G  | 21 | 12 A  | 0.0009318 |
| rs1783974   | 11 | 51376313 A  | 21 | 12 G  | 0.0009318 |
| rs544743    | 11 | 51384161 A  | 21 | 12 G  | 0.0009318 |
| rs568295    | 11 | 51388790 G  | 21 | 12 T  | 0.0009318 |
| rs503846    | 11 | 51393313 T  | 21 | 12 A  | 0.0009318 |
| rs1620679   | 11 | 51407874 T  | 21 | 12 C  | 0.0009318 |
| rs480014    | 11 | 51417899 T  | 22 | 12 G  | 0.000477  |
| rs508912    | 11 | 51418789 T  | 21 | 12 A  | 0.0009318 |
| rs527464    | 11 | 51440610 C  | 21 | 12 T  | 0.0009318 |
| rs505040    | 11 | 51443639 A  | 22 | 12 G  | 0.000477  |
| rs505039    | 11 | 51443640 A  | 22 | 12 G  | 0.000477  |
| rs479106    | 11 | 51444130 A  | 21 | 12 G  | 0.0009318 |
| rs496572    | 11 | 51456554 C  | 21 | 12 T  | 0.0009318 |
| rs510517    | 11 | 51460443 T  | 21 | 12 C  | 0.0009318 |
| rs530655    | 11 | 51469977 T  | 21 | 12 C  | 0.0009318 |
| rs10794391  | 11 | 51472652 C  | 21 | 12 T  | 0.0009318 |
| rs36122694  | 11 | 51478967 A  | 21 | 12 AC | 0.0009318 |
| rs5791938   | 11 | 51486517 AG | 21 | 12 A  | 0.0009318 |
| rs4881829   | 11 | 51492274 T  | 21 | 12 C  | 0.0009318 |
| rs7478797   | 11 | 51494224 A  | 21 | 12 T  | 0.0009318 |
| rs7951522   | 11 | 51495019 C  | 21 | 12 G  | 0.0009318 |
| rs7480344   | 11 | 51495569 T  | 21 | 12 A  | 0.0009318 |
| rs6598116   | 11 | 51502234 T  | 21 | 12 A  | 0.0009318 |
| rs7127896   | 11 | 51519416 C  | 21 | 12 T  | 0.0009318 |

|             |    |            |    |           |             |
|-------------|----|------------|----|-----------|-------------|
| rs7107202   | 11 | 51519430 T | 21 | 12 A      | 0.0009318   |
| rs10794398  | 11 | 51538073 G | 21 | 12 A      | 0.0009318   |
| rs7480941   | 11 | 51539692 A | 20 | 12 C      | 0.0008157   |
| rs4881864   | 11 | 51554380 G | 21 | 12 A      | 0.0009318   |
| rs4881865   | 11 | 51554552 A | 21 | 12 T      | 0.0009318   |
| rs10902378  | 11 | 51555757 A | 21 | 12 C      | 0.0009318   |
| rs77665545  | 11 | 51556448 T | 21 | 12 A      | 0.0009318   |
| rs10902385  | 11 | 51575951 A | 21 | 12 G      | 0.0009318   |
| rs4881874   | 11 | 51579888 G | 23 | 13 A      | 0.0002775   |
| rs9795278   | 11 | 54890653 A | 23 | 15 G      | 0.0007412   |
| rs10896808  | 11 | 58421179 C | 33 | 28 T      | 0.0009909   |
| rs12420131  | 11 | 61848276 C | 7  | 0 A       | 0.0008679   |
| rs10897275  | 11 | 62203865 A | 31 | 21 G      | 0.00008418  |
| rs9645690   | 11 | 62206288 T | 31 | 21 C      | 0.00008418  |
| rs59665939  | 11 | 62207685 G | 31 | 25 C      | 0.0008555   |
| rs56299751  | 11 | 62208039 A | 30 | 23 G      | 0.0007082   |
| rs11231093  | 11 | 62210822 A | 29 | 21 G      | 0.0006145   |
| rs10897278  | 11 | 62213068 A | 30 | 23 G      | 0.0007082   |
| rs12805216  | 11 | 62214363 A | 33 | 26 G      | 0.0002784   |
| rs12802176  | 11 | 64806701 A | 35 | 33 T      | 0.0005003   |
| rs7932004   | 11 | 66689915 A | 7  | 39 C      | 0.0001101   |
| rs7110302   | 11 | 66690454 T | 7  | 39 C      | 0.0001101   |
| 11:71910931 | 11 | 71910931 T | 26 | 20 TGTG   | 0.000739    |
| rs10898940  | 11 | 73455292 C | 16 | 53 A      | 0.0006806   |
| rs12222811  | 11 | 81703344 C | 7  | 0 T       | 0.0008679   |
| 11:83019686 | 11 | 83019686 G | 26 | 10 A      | 0.000002426 |
| 11:83019706 | 11 | 83019706 T | 22 | 8 A       | 0.00001321  |
| rs57719262  | 11 | 87207380 A | 8  | 0 G       | 0.0003016   |
| rs79744783  | 11 | 87211218 T | 7  | 0 C       | 0.0008679   |
| 11:87337925 | 11 | 87337925 C | 7  | 0 A       | 0.0008679   |
| rs117152419 | 11 | 87362825 G | 7  | 0 A       | 0.0008679   |
| rs308788    | 11 | 88285408 C | 0  | 19 T      | 0.00006755  |
| rs308787    | 11 | 88285704 C | 0  | 19 T      | 0.00006755  |
| rs308786    | 11 | 88285887 G | 0  | 19 A      | 0.00006755  |
| rs308785    | 11 | 88286031 G | 0  | 19 T      | 0.00006755  |
| rs308763    | 11 | 88289360 A | 0  | 18 G      | 0.0001312   |
| rs16914244  | 11 | 88295675 G | 0  | 16 T      | 0.0005294   |
| rs308872    | 11 | 88295873 G | 0  | 18 C      | 0.0001312   |
| rs308874    | 11 | 88297066 T | 0  | 18 C      | 0.0001312   |
| rs7949902   | 11 | 88297748 C | 0  | 16 T      | 0.0005294   |
| rs60953957  | 11 | 88308583 A | 0  | 16 ATTTAT | 0.0005294   |

|              |    |              |    |      |           |
|--------------|----|--------------|----|------|-----------|
| rs10831094   | 11 | 88311037 T   | 0  | 17 G | 0.0002606 |
| rs11821168   | 11 | 88312675 C   | 0  | 17 G | 0.0002606 |
| rs11020513   | 11 | 88313217 T   | 0  | 17 C | 0.0002606 |
| rs3913664    | 11 | 88313677 T   | 0  | 16 C | 0.0005294 |
| rs7944148    | 11 | 88315106 G   | 0  | 17 A | 0.0002606 |
| rs11826037   | 11 | 88316083 G   | 0  | 17 A | 0.0002606 |
| 11:92106942  | 11 | 92106942 G   | 7  | 0 A  | 0.0008679 |
| 11:95398394  | 11 | 95398394 C   | 8  | 0 T  | 0.0003016 |
| rs117615763  | 11 | 96175310 C   | 9  | 1 G  | 0.0007194 |
| rs75830241   | 11 | 96177533 G   | 9  | 1 A  | 0.0007194 |
| rs79010680   | 11 | 96190756 A   | 9  | 1 C  | 0.0007194 |
| rs140040266  | 11 | 96223824 T   | 9  | 1 A  | 0.0007194 |
| rs11217075   | 11 | 96678998 A   | 13 | 47 G | 0.0009845 |
| rs35274850   | 11 | 96703332 A   | 18 | 8 T  | 0.0005897 |
| rs12807861   | 11 | 96706992 C   | 18 | 8 G  | 0.0005897 |
| rs1452974    | 11 | 96709499 T   | 18 | 8 A  | 0.0005897 |
| rs1452976    | 11 | 96709583 G   | 18 | 8 C  | 0.0005897 |
| rs35541412   | 11 | 96710432 C   | 18 | 8 G  | 0.0005897 |
| rs34043458   | 11 | 96712892 T   | 18 | 8 C  | 0.0005897 |
| rs72959017   | 11 | 96713783 A   | 18 | 8 C  | 0.0005897 |
| rs55996850   | 11 | 96714195 G   | 18 | 8 T  | 0.0005897 |
| rs66512518   | 11 | 96715396 C   | 18 | 8 T  | 0.0005897 |
| rs55926807   | 11 | 96728216 T   | 18 | 8 G  | 0.0005897 |
| rs12795826   | 11 | 96729813 C   | 18 | 8 G  | 0.0005897 |
| rs2218990    | 11 | 96732368 T   | 18 | 8 C  | 0.0005897 |
| rs35440310   | 11 | 96734651 T   | 18 | 8 A  | 0.0005897 |
| rs11219720   | 11 | 96736172 C   | 20 | 11 G | 0.0008202 |
| rs1159532    | 11 | 96738190 A   | 18 | 8 G  | 0.0005897 |
| rs67365311   | 11 | 96742344 A   | 18 | 8 G  | 0.0005897 |
| rs35547878   | 11 | 96742763 T   | 18 | 8 A  | 0.0005897 |
| rs1869267    | 11 | 96745534 A   | 18 | 8 T  | 0.0005897 |
| rs1869268    | 11 | 96745574 A   | 18 | 8 G  | 0.0005897 |
| rs6589013    | 11 | 97618077 T   | 30 | 23 C | 0.0007082 |
| rs4754310    | 11 | 97625249 A   | 30 | 23 G | 0.0007082 |
| rs34502141   | 11 | 97625570 C   | 29 | 22 G | 0.0007063 |
| rs187247072  | 11 | 98475858 T   | 0  | 15 C | 0.0005628 |
| rs116881838  | 11 | 101317751 C  | 9  | 1 T  | 0.0007194 |
| 11:108781518 | 11 | 108781518 G  | 10 | 1 C  | 0.0002681 |
| rs35232735   | 11 | 109983724 CT | 26 | 18 C | 0.0007809 |
| rs7482993    | 11 | 109996139 A  | 27 | 18 G | 0.0007941 |
| rs12272465   | 11 | 109996164 G  | 27 | 18 A | 0.0007941 |

|             |    |              |    |          |            |
|-------------|----|--------------|----|----------|------------|
| rs10891059  | 11 | 109996248 G  | 26 | 16 A     | 0.000295   |
| rs729611    | 11 | 109996258 A  | 26 | 16 G     | 0.000295   |
| rs587802    | 11 | 109998415 A  | 26 | 18 T     | 0.0007809  |
| rs11213900  | 11 | 111310395 A  | 16 | 7 C      | 0.0009539  |
| rs55945818  | 11 | 111512871 A  | 11 | 43 G     | 0.0008678  |
| rs67420946  | 11 | 111583916 A  | 7  | 36 AAGTT | 0.0006639  |
| rs10891290  | 11 | 111605215 C  | 7  | 38 T     | 0.0001991  |
| rs736650    | 11 | 111607051 A  | 7  | 35 G     | 0.0007198  |
| rs72523156  | 11 | 111621399 CA | 8  | 38 C     | 0.0005059  |
| rs10891291  | 11 | 111627502 A  | 7  | 38 G     | 0.0001991  |
| rs3829258   | 11 | 111642119 A  | 7  | 37 G     | 0.0003628  |
| rs10502148  | 11 | 111647998 T  | 7  | 38 C     | 0.0001991  |
| rs1529330   | 11 | 111652323 C  | 7  | 35 T     | 0.0007198  |
| rs142679311 | 11 | 111659743 T  | 5  | 34 TC    | 0.00009587 |
| rs3867465   | 11 | 111662109 T  | 6  | 35 C     | 0.0002764  |
| rs635148    | 11 | 111678524 T  | 7  | 35 A     | 0.0007198  |
| rs12284944  | 11 | 111787383 G  | 7  | 35 A     | 0.0007198  |
| rs57377042  | 11 | 111791075 T  | 6  | 34 C     | 0.0005004  |
| rs7124433   | 11 | 111795148 G  | 7  | 35 C     | 0.0007198  |
| rs11384304  | 11 | 111796137 TG | 7  | 35 T     | 0.0007198  |
| rs1320664   | 11 | 111800849 G  | 7  | 35 A     | 0.0007198  |
| rs35759638  | 11 | 111808876 G  | 6  | 36 C     | 0.0001537  |
| rs10891301  | 11 | 111809489 T  | 6  | 36 C     | 0.0001537  |
| rs12225443  | 11 | 111814931 C  | 6  | 36 A     | 0.0001537  |
| rs11214049  | 11 | 111816143 G  | 6  | 36 A     | 0.0001537  |
| rs7945387   | 11 | 111817682 T  | 6  | 37 C     | 0.00008623 |
| rs35440570  | 11 | 111817914 C  | 6  | 36 T     | 0.0001537  |
| rs491535    | 11 | 111820482 C  | 6  | 37 G     | 0.00008623 |
| rs2105619   | 11 | 111825253 T  | 6  | 36 G     | 0.0001537  |
| rs12795123  | 11 | 111826511 G  | 6  | 36 T     | 0.0001537  |
| rs510274    | 11 | 111833209 A  | 6  | 31 G     | 0.0007822  |
| rs3809033   | 11 | 111845933 A  | 6  | 36 C     | 0.0001537  |
| rs1939528   | 11 | 111846715 A  | 6  | 36 G     | 0.0001537  |
| rs10891303  | 11 | 111848531 T  | 6  | 36 C     | 0.0001537  |
| rs10789854  | 11 | 111853865 C  | 6  | 36 G     | 0.0001537  |
| rs479658    | 11 | 111856412 C  | 6  | 37 A     | 0.00008623 |
| rs2851187   | 11 | 111857217 T  | 7  | 36 C     | 0.0006639  |
| rs4935890   | 11 | 111861156 T  | 6  | 37 C     | 0.00008623 |
| rs489417    | 11 | 111861190 G  | 6  | 37 A     | 0.00008623 |
| rs10789855  | 11 | 111866015 G  | 6  | 35 C     | 0.0002764  |
| rs3839945   | 11 | 111866442 G  | 6  | 35 GAC   | 0.0002764  |

|             |    |                   |   |        |            |
|-------------|----|-------------------|---|--------|------------|
| rs10891306  | 11 | 111869550 C       | 6 | 35 G   | 0.0002764  |
| rs35823624  | 11 | 111873931 A       | 6 | 35 G   | 0.0002764  |
| rs35345409  | 11 | 111874414 T       | 6 | 35 C   | 0.0002764  |
| rs10789856  | 11 | 111875773 T       | 6 | 35 C   | 0.0002764  |
| rs2081508   | 11 | 111876817 T       | 6 | 35 C   | 0.0002764  |
| rs149534010 | 11 | 111877844 G       | 6 | 36 A   | 0.0001537  |
| rs201198738 | 11 | 111878217 G       | 6 | 35 GAC | 0.0002764  |
| rs202204694 | 11 | 111880807 CCTT    | 6 | 37 C   | 0.00008623 |
| rs650461    | 11 | 111889635 G       | 6 | 36 C   | 0.0001537  |
| rs10891310  | 11 | 111892059 C       | 6 | 36 A   | 0.0001537  |
| rs9971485   | 11 | 111892246 C       | 6 | 36 G   | 0.0001537  |
| rs606721    | 11 | 111892515 A       | 6 | 36 G   | 0.0001537  |
| rs1130025   | 11 | 111892527 T       | 6 | 36 C   | 0.0001537  |
| rs7940353   | 11 | 111893843 C       | 6 | 36 G   | 0.0001537  |
| rs2276391   | 11 | 111895253 T       | 6 | 35 A   | 0.0002764  |
| rs2276390   | 11 | 111895254 T       | 6 | 35 G   | 0.0002764  |
| rs2303436   | 11 | 111896324 T       | 6 | 35 C   | 0.0002764  |
| rs59151988  | 11 | 111897658 G       | 6 | 35 A   | 0.0002764  |
| rs4456288   | 11 | 111897741 T       | 5 | 34 C   | 0.00009587 |
| rs142747216 | 11 | 111897941 T       | 6 | 33 C   | 0.0009098  |
| rs9704549   | 11 | 111898203 T       | 6 | 32 C   | 0.00098    |
| rs370830942 | 11 | 111898224 T       | 6 | 32 C   | 0.00098    |
| rs373140686 | 11 | 111898225 G       | 6 | 32 A   | 0.00098    |
| rs201205994 | 11 | 111898617 AGAGAGG | 6 | 34 A   | 0.0005004  |
| rs11390768  | 11 | 111901115 CA      | 6 | 37 C   | 0.00008623 |
| rs10789858  | 11 | 111902202 G       | 6 | 36 A   | 0.0001537  |
| rs478941    | 11 | 111903995 C       | 6 | 37 T   | 0.00008623 |
| rs694747    | 11 | 111904526 C       | 6 | 37 T   | 0.00008623 |
| rs6589259   | 11 | 111905468 G       | 6 | 34 A   | 0.0002824  |
| rs71060207  | 11 | 111906820 CAT     | 6 | 37 C   | 0.00008623 |
| rs627441    | 11 | 111908162 C       | 6 | 37 T   | 0.00008623 |
| rs6589260   | 11 | 111909819 A       | 6 | 36 C   | 0.0001537  |
| rs10891313  | 11 | 111912083 G       | 6 | 36 A   | 0.0001537  |
| rs7949136   | 11 | 111913364 A       | 6 | 36 G   | 0.0001537  |
| rs559170    | 11 | 111914566 G       | 6 | 37 A   | 0.00008623 |
| rs646469    | 11 | 111916342 G       | 6 | 37 A   | 0.00008623 |
| rs10891314  | 11 | 111916647 A       | 6 | 36 G   | 0.0001537  |
| rs676922    | 11 | 111920741 G       | 7 | 37 A   | 0.0003628  |
| rs514615    | 11 | 111921108 T       | 7 | 37 C   | 0.0003628  |
| rs11214068  | 11 | 111926072 C       | 6 | 36 G   | 0.0001537  |
| rs12576402  | 11 | 111926528 C       | 6 | 36 T   | 0.0001537  |

|              |    |               |    |        |              |
|--------------|----|---------------|----|--------|--------------|
| rs34169957   | 11 | 111927363 A   | 6  | 36 AT  | 0.0001537    |
| rs3882890    | 11 | 111930576 T   | 6  | 36 C   | 0.0001537    |
| rs10891315   | 11 | 111933088 G   | 7  | 36 A   | 0.0006639    |
| rs9371       | 11 | 111933678 G   | 7  | 37 A   | 0.0003628    |
| rs9822       | 11 | 111934507 C   | 6  | 36 G   | 0.0001537    |
| rs11214075   | 11 | 111942256 C   | 6  | 36 T   | 0.0001537    |
| rs2303437    | 11 | 111944901 T   | 6  | 34 C   | 0.0005004    |
| rs12417851   | 11 | 111950136 A   | 6  | 34 G   | 0.0005004    |
| rs3839946    | 11 | 111953922 TA  | 7  | 35 T   | 0.0007198    |
| rs10812      | 11 | 111955502 T   | 6  | 33 C   | 0.000495     |
| rs35404297   | 11 | 111960377 T   | 7  | 35 TA  | 0.0007198    |
| rs10789859   | 11 | 111960533 C   | 7  | 35 T   | 0.0007198    |
| rs559147     | 11 | 111969827 C   | 7  | 35 G   | 0.0007198    |
| rs498547     | 11 | 111972656 T   | 7  | 35 C   | 0.0007198    |
| rs7944155    | 11 | 111973603 T   | 7  | 35 G   | 0.0007198    |
| rs12272763   | 11 | 111988926 T   | 7  | 35 C   | 0.0007198    |
| rs10431070   | 11 | 112779711 T   | 4  | 28 C   | 0.0008078    |
| 11:113378629 | 11 | 113378629 G   | 8  | 40 T   | 0.00005012   |
| rs73010348   | 11 | 117422690 A   | 9  | 0 G    | 0.0001034    |
| rs10892138   | 11 | 117437699 G   | 13 | 0 T    | 0.000001239  |
| rs59765231   | 11 | 117438189 C   | 13 | 0 T    | 0.000001239  |
| rs648740     | 11 | 117447373 A   | 13 | 0 G    | 0.000001239  |
| rs12799825   | 11 | 117448013 A   | 14 | 0 C    | 0.0000003945 |
| rs681046     | 11 | 117452212 C   | 13 | 0 T    | 0.000001239  |
| rs490914     | 11 | 117475052 T   | 11 | 1 A    | 0.00009775   |
| rs680292     | 11 | 117475341 T   | 11 | 1 G    | 0.00009775   |
| rs512017     | 11 | 117511787 G   | 28 | 20 A   | 0.0005398    |
| rs480801     | 11 | 117512831 C   | 28 | 19 T   | 0.0002695    |
| rs537592     | 11 | 117517424 C   | 27 | 19 T   | 0.0008555    |
| rs626571     | 11 | 117518038 C   | 29 | 20 T   | 0.000273     |
| rs673028     | 11 | 117518200 G   | 29 | 20 A   | 0.000273     |
| rs678327     | 11 | 117521603 A   | 32 | 25 G   | 0.0004454    |
| rs5795209    | 11 | 119882854 G   | 12 | 45 GT  | 0.0009266    |
| rs61897906   | 11 | 119887951 A   | 12 | 45 G   | 0.0009266    |
| 11:119889757 | 11 | 119889757 CCG | 12 | 45 C   | 0.0009266    |
| rs113601370  | 11 | 119897502 G   | 33 | 27 GGC | 0.0002335    |
| 11:119897506 | 11 | 119897506 T   | 34 | 27 G   | 0.0001123    |
| rs1784014    | 11 | 119897514 T   | 33 | 27 G   | 0.0002335    |
| rs1787023    | 11 | 119903704 T   | 13 | 51 C   | 0.0001497    |
| rs1530919    | 11 | 119905908 A   | 11 | 45 G   | 0.0004315    |
| rs12420530   | 11 | 119907605 T   | 11 | 43 G   | 0.0007455    |

|             |    |               |    |       |           |
|-------------|----|---------------|----|-------|-----------|
| rs11217652  | 11 | 119909306 C   | 11 | 45 G  | 0.0004315 |
| rs5795211   | 11 | 119910438 T   | 11 | 45 TC | 0.0004315 |
| rs2084893   | 11 | 119914182 G   | 11 | 45 C  | 0.0004315 |
| rs1597866   | 11 | 119914915 G   | 11 | 45 A  | 0.0004315 |
| rs2100357   | 11 | 119915395 T   | 11 | 45 C  | 0.0004315 |
| rs2084892   | 11 | 119915651 A   | 11 | 45 G  | 0.0004315 |
| rs2887378   | 11 | 119916226 A   | 11 | 45 G  | 0.0004315 |
| rs11217656  | 11 | 119918703 A   | 11 | 45 G  | 0.0004315 |
| rs11217660  | 11 | 119920139 A   | 11 | 45 G  | 0.0004315 |
| rs10892522  | 11 | 119921730 G   | 23 | 14 A  | 0.0008216 |
| rs12421541  | 11 | 119922558 T   | 11 | 45 A  | 0.0004315 |
| rs666640    | 11 | 119923259 T   | 11 | 45 A  | 0.0004315 |
| rs1001973   | 11 | 119923643 A   | 11 | 45 G  | 0.0004315 |
| rs664845    | 11 | 119923652 A   | 11 | 45 G  | 0.0004315 |
| rs628861    | 11 | 119925575 A   | 11 | 45 C  | 0.0004315 |
| rs4938762   | 11 | 119927043 T   | 11 | 44 C  | 0.0007768 |
| rs11217663  | 11 | 119927491 C   | 11 | 44 T  | 0.0007768 |
| rs1545509   | 11 | 119927888 A   | 11 | 44 G  | 0.0007768 |
| rs10444336  | 11 | 119928883 A   | 11 | 44 C  | 0.0007768 |
| rs10444337  | 11 | 119929276 A   | 11 | 44 G  | 0.0007768 |
| rs10444338  | 11 | 119929445 C   | 11 | 44 T  | 0.0007768 |
| rs56937356  | 11 | 119932050 T   | 10 | 43 C  | 0.0003854 |
| rs11439053  | 11 | 122917024 GA  | 13 | 3 G   | 0.0005464 |
| rs77115993  | 11 | 123083510 T   | 1  | 19 G  | 0.0008417 |
| rs76330420  | 11 | 123083904 G   | 1  | 19 A  | 0.0008417 |
| rs35040533  | 11 | 123083911 G   | 1  | 19 A  | 0.0008417 |
| rs7927152   | 11 | 123087671 T   | 2  | 23 C  | 0.0005167 |
| rs113857229 | 11 | 123087733 G   | 2  | 23 T  | 0.0005167 |
| rs7927804   | 11 | 123088216 T   | 2  | 23 C  | 0.0005167 |
| rs60653352  | 11 | 123088698 GCT | 2  | 22 G  | 0.0009583 |
| rs7931911   | 11 | 123089206 C   | 2  | 23 G  | 0.0005167 |
| rs10892982  | 11 | 123090555 A   | 2  | 23 G  | 0.0005167 |
| rs10892983  | 11 | 123092243 T   | 2  | 23 C  | 0.0005167 |
| rs11600907  | 11 | 123092831 A   | 2  | 23 G  | 0.0005167 |
| rs12272976  | 11 | 123093198 T   | 3  | 27 C  | 0.0002808 |
| rs10892984  | 11 | 123094150 T   | 3  | 27 A  | 0.0002808 |
| rs10790975  | 11 | 128756183 C   | 17 | 7 A   | 0.0004382 |
| rs10736569  | 11 | 128756564 T   | 16 | 7 C   | 0.0009539 |
| rs1940457   | 11 | 128757286 G   | 16 | 7 T   | 0.0009539 |
| rs199564754 | 11 | 129907486 GGC | 1  | 19 G  | 0.0008417 |
| rs2537761   | 12 | 10483698 G    | 34 | 28 T  | 0.00053   |



|             |    |              |    |         |           |
|-------------|----|--------------|----|---------|-----------|
| rs73062703  | 12 | 10484833 G   | 20 | 11 A    | 0.0008202 |
| rs145800306 | 12 | 10484969 GA  | 20 | 11 G    | 0.0008202 |
| rs12370603  | 12 | 10485242 G   | 36 | 31 C    | 0.0003502 |
| rs2110598   | 12 | 12900512 G   | 30 | 23 A    | 0.0007082 |
| rs73240463  | 12 | 20863306 C   | 9  | 1 T     | 0.0007194 |
| rs1566331   | 12 | 24276792 C   | 20 | 11 G    | 0.0008202 |
| rs1039228   | 12 | 24285197 C   | 2  | 22 G    | 0.0009583 |
| rs371781671 | 12 | 25689751 G   | 7  | 0 A     | 0.0008679 |
| 12:26865583 | 12 | 26865583 T   | 20 | 10 C    | 0.0005561 |
| rs754296    | 12 | 30270589 A   | 18 | 9 G     | 0.0009279 |
| rs1402360   | 12 | 43276559 T   | 3  | 26 G    | 0.0005074 |
| 12:49151441 | 12 | 49151441 A   | 17 | 7 AT    | 0.0005099 |
| rs638515    | 12 | 50303927 C   | 40 | 38 T    | 0.0003907 |
| rs61926091  | 12 | 50309023 A   | 40 | 39 G    | 0.0006806 |
| rs661776    | 12 | 50314771 T   | 34 | 29 C    | 0.0006139 |
| rs836568    | 12 | 50315401 G   | 34 | 29 A    | 0.0006139 |
| rs836567    | 12 | 50315463 C   | 34 | 29 T    | 0.0006139 |
| rs659674    | 12 | 50315797 C   | 34 | 29 T    | 0.0006139 |
| rs584385    | 12 | 50316901 T   | 34 | 29 C    | 0.0006139 |
| rs297942    | 12 | 50318528 T   | 34 | 27 C    | 0.0002666 |
| rs7311832   | 12 | 51618856 G   | 20 | 11 A    | 0.0008202 |
| rs7312011   | 12 | 51619155 C   | 20 | 11 T    | 0.0008202 |
| rs58891036  | 12 | 51624973 T   | 20 | 10 TAAA | 0.0005561 |
| rs7397479   | 12 | 51630614 T   | 20 | 11 C    | 0.0008202 |
| rs10735833  | 12 | 51631016 C   | 20 | 11 A    | 0.0008202 |
| rs1049467   | 12 | 51636259 C   | 20 | 11 T    | 0.0008202 |
| rs11331542  | 12 | 51641035 CA  | 20 | 11 C    | 0.0008202 |
| rs11613388  | 12 | 54342563 T   | 18 | 9 C     | 0.0009279 |
| rs3832829   | 12 | 54383924 GCC | 6  | 33 G    | 0.0009098 |
| rs1109391   | 12 | 54387377 T   | 37 | 31 G    | 0.0001688 |
| rs4759316   | 12 | 54388473 A   | 37 | 31 G    | 0.0001688 |
| rs71953465  | 12 | 54437750 G   | 20 | 11 GTT  | 0.0007056 |
| 12:54904482 | 12 | 54904482 T   | 7  | 0 C     | 0.0009566 |
| rs144106147 | 12 | 57220184 A   | 7  | 0 G     | 0.0008679 |
| rs117634863 | 12 | 57234927 G   | 7  | 0 C     | 0.0008679 |
| rs117120119 | 12 | 57237463 G   | 9  | 0 C     | 0.0001034 |
| rs35663032  | 12 | 57247188 T   | 9  | 1 G     | 0.0007194 |
| rs28678573  | 12 | 57262741 A   | 9  | 1 G     | 0.0007194 |
| rs11610564  | 12 | 57296274 C   | 9  | 1 T     | 0.0007194 |
| rs7300263   | 12 | 60899873 C   | 2  | 22 T    | 0.0009583 |
| rs11173501  | 12 | 60903883 C   | 2  | 22 T    | 0.0009583 |

|             |    |                        |    |         |            |
|-------------|----|------------------------|----|---------|------------|
| rs141586045 | 12 | 60906183 A             | 2  | 22 AAAG | 0.0009583  |
| rs7312092   | 12 | 60916935 A             | 2  | 22 G    | 0.0009583  |
| rs12307323  | 12 | 60917014 A             | 2  | 22 G    | 0.0009583  |
| rs73129004  | 12 | 60918843 A             | 2  | 22 C    | 0.0009583  |
| rs35819407  | 12 | 60932005 AT            | 2  | 22 A    | 0.0009583  |
| rs11173512  | 12 | 60933305 T             | 2  | 22 A    | 0.0009583  |
| rs12313466  | 12 | 60937861 G             | 2  | 22 A    | 0.0009583  |
| rs12313099  | 12 | 60950166 T             | 2  | 22 G    | 0.0009583  |
| rs9919797   | 12 | 60952404 A             | 2  | 22 G    | 0.0009583  |
| rs147477900 | 12 | 60952934 GTGATGTGCTGTC | 3  | 25 G    | 0.0009258  |
| rs11173522  | 12 | 60953472 A             | 3  | 25 C    | 0.0009258  |
| rs73130285  | 12 | 61759110 G             | 9  | 1 A     | 0.0007194  |
| rs11173917  | 12 | 61765951 C             | 9  | 1 T     | 0.0007194  |
| rs11173919  | 12 | 61768732 T             | 9  | 1 C     | 0.0007194  |
| rs73130300  | 12 | 61770505 C             | 9  | 1 T     | 0.0007194  |
| rs11173953  | 12 | 61788334 T             | 9  | 1 C     | 0.0007194  |
| rs73115534  | 12 | 61798909 T             | 9  | 1 C     | 0.0007194  |
| rs1516031   | 12 | 61802226 G             | 9  | 1 A     | 0.0007194  |
| rs12301969  | 12 | 61808150 C             | 9  | 1 T     | 0.0007194  |
| rs139572285 | 12 | 61808905 G             | 9  | 1 C     | 0.0007194  |
| rs11173988  | 12 | 61809215 C             | 9  | 1 T     | 0.0007194  |
| rs11173990  | 12 | 61809325 T             | 9  | 1 C     | 0.0007194  |
| rs148131026 | 12 | 61810255 G             | 9  | 1 T     | 0.0007194  |
| rs12227992  | 12 | 61817650 G             | 9  | 1 C     | 0.0007194  |
| rs11174010  | 12 | 61818194 C             | 9  | 1 T     | 0.0007194  |
| rs8181615   | 12 | 61839142 T             | 9  | 1 C     | 0.0007194  |
| rs7294839   | 12 | 69510098 G             | 11 | 44 C    | 0.0004199  |
| rs73332112  | 12 | 71236244 G             | 13 | 4 T     | 0.000883   |
| rs11358197  | 12 | 71250514 A             | 13 | 4 AT    | 0.000883   |
| rs73332150  | 12 | 71252402 A             | 13 | 4 C     | 0.000883   |
| rs12302875  | 12 | 71252916 T             | 13 | 4 C     | 0.000883   |
| rs73332175  | 12 | 71263378 T             | 13 | 4 C     | 0.000883   |
| rs12306153  | 12 | 71264782 G             | 13 | 4 C     | 0.000883   |
| rs7975082   | 12 | 71265577 G             | 13 | 4 A     | 0.000883   |
| rs7313997   | 12 | 71265958 C             | 13 | 4 A     | 0.000883   |
| rs12305560  | 12 | 71269754 T             | 13 | 4 C     | 0.000883   |
| rs113621739 | 12 | 73788190 G             | 40 | 34 A    | 0.00008167 |
| rs200626615 | 12 | 73788192 A             | 16 | 56 G    | 0.0001751  |
| rs11105147  | 12 | 77808154 A             | 27 | 18 G    | 0.0004001  |
| rs200391075 | 12 | 81755796 G             | 0  | 15 C    | 0.0005628  |
| rs113717657 | 12 | 82040845 A             | 0  | 14 G    | 0.0009501  |

|            |    |                        |    |        |           |
|------------|----|------------------------|----|--------|-----------|
| rs7958440  | 12 | 85094289 C             | 11 | 46 A   | 0.0002401 |
| rs12815101 | 12 | 85098417 A             | 13 | 49 T   | 0.0003246 |
| rs7305535  | 12 | 85099563 A             | 11 | 46 G   | 0.0002401 |
| rs66587911 | 12 | 85105512 G             | 11 | 46 GT  | 0.0002401 |
| rs4417331  | 12 | 85126040 G             | 11 | 47 T   | 0.0001343 |
| rs12812186 | 12 | 85130681 T             | 11 | 46 G   | 0.0002401 |
| rs12812197 | 12 | 85130694 A             | 11 | 46 G   | 0.0002401 |
| rs71076106 | 12 | 85130890 TA            | 11 | 46 T   | 0.0002133 |
| rs7959249  | 12 | 85131338 A             | 11 | 46 C   | 0.0002401 |
| rs10862925 | 12 | 85132607 G             | 11 | 46 T   | 0.0002401 |
| rs11608665 | 12 | 85132866 C             | 11 | 46 T   | 0.0002401 |
| rs11116567 | 12 | 85133829 G             | 11 | 46 A   | 0.0002401 |
| rs7975168  | 12 | 85135376 T             | 11 | 46 C   | 0.0002401 |
| rs7974535  | 12 | 85135521 A             | 11 | 46 G   | 0.0002401 |
| rs12811799 | 12 | 85136452 G             | 11 | 46 T   | 0.0002401 |
| rs11116569 | 12 | 85139350 G             | 11 | 46 A   | 0.0002401 |
| rs11116570 | 12 | 85140141 A             | 11 | 46 G   | 0.0002401 |
| rs11116571 | 12 | 85140787 C             | 11 | 46 T   | 0.0002401 |
| rs4424713  | 12 | 85142898 A             | 11 | 46 G   | 0.0002401 |
| rs4761090  | 12 | 85144089 G             | 11 | 46 A   | 0.0002401 |
| rs10746332 | 12 | 85145427 G             | 11 | 46 A   | 0.0002401 |
| rs3051102  | 12 | 85146708 C             | 11 | 46 CAT | 0.0002401 |
| rs7297078  | 12 | 85147102 T             | 11 | 46 C   | 0.0002401 |
| rs10779124 | 12 | 85147452 T             | 11 | 46 C   | 0.0002401 |
| rs11116584 | 12 | 85147715 A             | 11 | 46 G   | 0.0002401 |
| rs10779125 | 12 | 85148325 T             | 11 | 46 C   | 0.0002401 |
| rs10779126 | 12 | 85148575 C             | 11 | 46 T   | 0.0002401 |
| rs5799843  | 12 | 88313577 TA            | 4  | 28 T   | 0.0008078 |
| rs825963   | 12 | 90726160 T             | 40 | 36 G   | 0.0001751 |
| rs34969611 | 12 | 90726275 G             | 40 | 36 GCA | 0.0001751 |
| rs1148691  | 12 | 90734509 T             | 5  | 31 C   | 0.0006549 |
| rs35236110 | 12 | 90736251 A             | 5  | 31 AC  | 0.0006549 |
| rs704094   | 12 | 90739448 T             | 5  | 31 C   | 0.0006549 |
| rs704096   | 12 | 90740480 C             | 5  | 31 T   | 0.0006549 |
| rs864851   | 12 | 90742720 T             | 5  | 31 G   | 0.0006549 |
| rs4842725  | 12 | 90743103 G             | 5  | 31 A   | 0.0006549 |
| rs60587792 | 12 | 90743126 TATGCAAGTGTCA | 3  | 27 T   | 0.0002409 |
| rs1499802  | 12 | 90743557 A             | 5  | 31 G   | 0.0006549 |
| rs1527024  | 12 | 90744231 A             | 5  | 31 C   | 0.0006549 |
| rs704097   | 12 | 90745631 G             | 5  | 31 T   | 0.0006549 |
| rs704098   | 12 | 90746687 C             | 5  | 31 G   | 0.0006549 |

|              |    |                  |    |            |            |
|--------------|----|------------------|----|------------|------------|
| rs704099     | 12 | 90746821 A       | 5  | 31 T       | 0.0006549  |
| rs704100     | 12 | 90747312 C       | 5  | 31 T       | 0.0006549  |
| rs704101     | 12 | 90748127 A       | 5  | 31 G       | 0.0006549  |
| rs1653580    | 12 | 90749277 G       | 5  | 31 A       | 0.0006549  |
| rs826214     | 12 | 90749899 T       | 5  | 31 C       | 0.0006549  |
| rs1148690    | 12 | 90751162 C       | 8  | 37 G       | 0.0008686  |
| rs1148689    | 12 | 90751181 C       | 5  | 31 A       | 0.0006549  |
| rs17017853   | 12 | 90756180 G       | 5  | 31 A       | 0.0006549  |
| rs7135829    | 12 | 90757533 G       | 5  | 31 A       | 0.0006549  |
| rs851648     | 12 | 90758129 A       | 8  | 37 T       | 0.0008686  |
| rs34737918   | 12 | 90759341 A       | 5  | 31 AT      | 0.0006549  |
| rs35014129   | 12 | 90760647 A       | 5  | 31 AC      | 0.0006549  |
| rs704103     | 12 | 90762487 C       | 5  | 31 G       | 0.0006549  |
| rs67355962   | 12 | 90762875 C       | 5  | 31 CATGAAT | 0.0006549  |
| rs1148685    | 12 | 90763408 T       | 5  | 31 C       | 0.0006549  |
| rs1222658    | 12 | 90764376 C       | 5  | 31 T       | 0.0006549  |
| rs860459     | 12 | 100614498 T      | 16 | 6 C        | 0.0005436  |
| rs150482549  | 12 | 100622249 TGGGCA | 14 | 5 T        | 0.0006534  |
| rs11836972   | 12 | 101996918 C      | 14 | 4 T        | 0.0003939  |
| rs11834115   | 12 | 101998203 C      | 14 | 4 T        | 0.0003939  |
| rs111110885  | 12 | 102003816 T      | 14 | 5 C        | 0.0008508  |
| rs72301569   | 12 | 102004290 CT     | 14 | 5 C        | 0.0008508  |
| rs79769390   | 12 | 102004539 T      | 14 | 5 C        | 0.0008508  |
| rs7308665    | 12 | 102006501 A      | 23 | 14 G       | 0.0007414  |
| rs10507132   | 12 | 102006992 T      | 14 | 5 C        | 0.0008508  |
| rs11830848   | 12 | 102007433 C      | 14 | 4 T        | 0.0003939  |
| rs7963476    | 12 | 102008823 A      | 14 | 5 G        | 0.0008508  |
| rs7963722    | 12 | 102009069 C      | 14 | 5 G        | 0.0008508  |
| rs7967311    | 12 | 102009916 T      | 14 | 5 C        | 0.0008508  |
| 12:103098033 | 12 | 103098033 T      | 6  | 38 TCCTTCC | 0.00008484 |
| rs10860906   | 12 | 103098034 T      | 6  | 38 C       | 0.00008484 |
| 12:105526569 | 12 | 105526569 A      | 33 | 24 T       | 0.000109   |
| rs4529927    | 12 | 108749359 G      | 10 | 44 T       | 0.000219   |
| rs10850306   | 12 | 114724414 G      | 33 | 28 A       | 0.0009909  |
| rs11067035   | 12 | 114742173 G      | 13 | 2 A        | 0.0001085  |
| rs59076525   | 12 | 115263658 G      | 8  | 0 A        | 0.0003016  |
| rs780892     | 12 | 116224360 C      | 20 | 11 G       | 0.0008202  |
| rs1715583    | 12 | 116225839 A      | 20 | 11 G       | 0.0008202  |
| rs1647103    | 12 | 116227378 T      | 20 | 11 C       | 0.0008202  |
| rs2681455    | 12 | 116261087 A      | 36 | 31 G       | 0.0005991  |
| rs375510578  | 12 | 118604654 T      | 14 | 4 C        | 0.0003939  |

|              |    |                 |    |               |            |
|--------------|----|-----------------|----|---------------|------------|
| 12:122052734 | 12 | 122052734 AAAAG | 2  | 22 A          | 0.0005044  |
| rs12229898   | 12 | 130888284 G     | 0  | 16 A          | 0.0005294  |
| rs12309914   | 12 | 131442850 T     | 30 | 23 C          | 0.0007875  |
| rs376761445  | 13 | 19679763 T      | 13 | 4 G           | 0.000883   |
| rs61946215   | 13 | 19691884 G      | 18 | 8 A           | 0.0005739  |
| rs12865323   | 13 | 25373515 C      | 1  | 20 G          | 0.0004403  |
| rs146464268  | 13 | 25375950 T      | 1  | 20 TTTC       | 0.0004403  |
| rs2186217    | 13 | 25376995 A      | 1  | 20 G          | 0.0004403  |
| rs202048843  | 13 | 25385229 A      | 1  | 20 C          | 0.0004403  |
| rs373378943  | 13 | 25385318 C      | 1  | 20 T          | 0.0004403  |
| rs200257871  | 13 | 25385942 A      | 1  | 20 G          | 0.0004403  |
| rs71431704   | 13 | 25386966 A      | 1  | 20 C          | 0.0004403  |
| rs35138618   | 13 | 25394623 G      | 1  | 20 GAGT       | 0.0004403  |
| rs34876328   | 13 | 25395494 C      | 1  | 20 CA         | 0.0004403  |
| rs71431706   | 13 | 25395774 G      | 1  | 20 A          | 0.0004403  |
| rs12856222   | 13 | 25396027 A      | 1  | 20 T          | 0.0004403  |
| rs17081239   | 13 | 25404364 G      | 1  | 20 A          | 0.0004403  |
| rs2121252    | 13 | 25410290 C      | 1  | 20 G          | 0.0004403  |
| rs7998291    | 13 | 25412619 G      | 1  | 20 A          | 0.0004403  |
| rs147388360  | 13 | 25412959 G      | 1  | 20 GAGCAGTCAA | 0.0004403  |
| rs144125849  | 13 | 25412968 A      | 1  | 20 G          | 0.0004403  |
| rs71431711   | 13 | 25414647 C      | 1  | 20 T          | 0.0004403  |
| rs12876959   | 13 | 25433561 G      | 1  | 20 C          | 0.0004403  |
| rs3839991    | 13 | 25451475 TAC    | 1  | 20 T          | 0.0004403  |
| rs71431715   | 13 | 25454998 T      | 1  | 20 C          | 0.0004403  |
| rs12864973   | 13 | 25459270 T      | 1  | 20 C          | 0.0004403  |
| rs34990870   | 13 | 25462716 T      | 1  | 20 TA         | 0.0004403  |
| rs71431716   | 13 | 25474085 A      | 1  | 19 G          | 0.0008293  |
| rs12429192   | 13 | 25474443 C      | 1  | 20 T          | 0.0004403  |
| rs67483456   | 13 | 25481769 A      | 1  | 20 AATACTT    | 0.0004403  |
| rs9553470    | 13 | 25500327 T      | 1  | 19 C          | 0.0008417  |
| rs12864497   | 13 | 25503448 T      | 1  | 19 C          | 0.0008417  |
| rs12428615   | 13 | 25522015 A      | 1  | 19 C          | 0.0008417  |
| rs7333197    | 13 | 25526357 T      | 1  | 19 C          | 0.0008417  |
| rs9553479    | 13 | 25528542 T      | 1  | 19 C          | 0.0008417  |
| rs143109001  | 13 | 25528927 C      | 3  | 27 T          | 0.0002808  |
| rs71431724   | 13 | 25528984 A      | 3  | 27 G          | 0.0002808  |
| rs4268601    | 13 | 29911974 A      | 3  | 25 G          | 0.000918   |
| rs200445708  | 13 | 29946121 C      | 6  | 38 CCCCACA    | 0.00008484 |
| rs200430206  | 13 | 29946123 C      | 15 | 5 CCA         | 0.0003243  |
| rs112601805  | 13 | 34201773 C      | 7  | 0 CA          | 0.0009566  |

|             |    |              |    |           |            |
|-------------|----|--------------|----|-----------|------------|
| rs72621283  | 13 | 36704967 A   | 31 | 24 G      | 0.0004543  |
| rs9565874   | 13 | 36707981 T   | 31 | 22 A      | 0.0001772  |
| rs9565875   | 13 | 36708040 A   | 31 | 22 G      | 0.0001772  |
| rs9575380   | 13 | 36708286 G   | 31 | 22 A      | 0.0001772  |
| rs1328652   | 13 | 36709527 T   | 31 | 22 C      | 0.0001772  |
| rs4480666   | 13 | 36713946 G   | 31 | 22 A      | 0.0001772  |
| rs67889814  | 13 | 36716095 G   | 31 | 22 GA     | 0.0001772  |
| rs9575407   | 13 | 36716901 C   | 31 | 22 T      | 0.0001772  |
| rs55785621  | 13 | 36718445 A   | 31 | 22 G      | 0.0001772  |
| rs11839407  | 13 | 36721457 A   | 31 | 22 G      | 0.0001772  |
| rs7996350   | 13 | 36723145 C   | 36 | 27 G      | 0.00003771 |
| rs2149422   | 13 | 36724392 A   | 31 | 22 C      | 0.0001772  |
| rs76291553  | 13 | 36725064 A   | 31 | 22 AG     | 0.0001772  |
| rs1928017   | 13 | 36726009 A   | 31 | 22 C      | 0.0001772  |
| rs7333872   | 13 | 36726387 T   | 33 | 23 C      | 0.00005195 |
| rs7329072   | 13 | 36728229 A   | 33 | 23 T      | 0.00005195 |
| rs7322525   | 13 | 36728490 A   | 31 | 21 G      | 0.00003533 |
| rs146483983 | 13 | 36728706 C   | 33 | 23 CAAACA | 0.00005195 |
| rs36120646  | 13 | 36729284 A   | 33 | 23 G      | 0.00005195 |
| rs34780772  | 13 | 36730591 TGA | 33 | 24 T      | 0.000109   |
| rs17053576  | 13 | 36730932 C   | 33 | 23 T      | 0.00005195 |
| rs11841245  | 13 | 36731120 A   | 33 | 23 G      | 0.00005195 |
| rs9575434   | 13 | 36731197 T   | 33 | 23 C      | 0.00005195 |
| rs9575437   | 13 | 36731208 G   | 33 | 23 A      | 0.00005195 |
| rs9575445   | 13 | 36731586 A   | 34 | 23 G      | 0.00002346 |
| rs7324116   | 13 | 36731747 T   | 33 | 23 G      | 0.00005195 |
| rs7331192   | 13 | 36731772 C   | 33 | 23 T      | 0.00005195 |
| rs6563367   | 13 | 36732032 G   | 33 | 23 A      | 0.00005195 |
| rs6563368   | 13 | 36732113 T   | 33 | 23 C      | 0.00005195 |
| rs6563369   | 13 | 36732378 G   | 33 | 23 A      | 0.00005195 |
| rs1328646   | 13 | 36732654 A   | 39 | 32 G      | 0.00004458 |
| rs11616924  | 13 | 36733944 G   | 27 | 19 A      | 0.000391   |
| rs9575485   | 13 | 36735181 A   | 38 | 35 G      | 0.0006427  |
| rs9575486   | 13 | 36735182 C   | 38 | 35 T      | 0.0006427  |
| rs7338030   | 13 | 37943237 C   | 13 | 48 A      | 0.0005647  |
| rs9576253   | 13 | 37943359 C   | 12 | 49 T      | 0.0001424  |
| rs9566214   | 13 | 37943776 T   | 11 | 49 C      | 0.00006054 |
| rs9566215   | 13 | 37943825 T   | 11 | 49 C      | 0.00006054 |
| rs9576254   | 13 | 37944123 C   | 11 | 49 G      | 0.00006054 |
| rs1324023   | 13 | 37944928 G   | 12 | 49 A      | 0.0001424  |
| rs4943495   | 13 | 37945343 T   | 33 | 28 C      | 0.0009909  |

|             |    |                       |    |          |           |
|-------------|----|-----------------------|----|----------|-----------|
| rs4943496   | 13 | 37945499 C            | 33 | 28 T     | 0.0009909 |
| rs1072736   | 13 | 37946430 G            | 35 | 29 T     | 0.0005465 |
| rs57441523  | 13 | 37946930 TG           | 33 | 28 T     | 0.0009909 |
| rs7991989   | 13 | 37947132 C            | 33 | 28 T     | 0.0009909 |
| rs71198442  | 13 | 37947257 T            | 33 | 28 TTCTC | 0.0009909 |
| rs4420394   | 13 | 37948260 C            | 33 | 28 T     | 0.0009909 |
| rs1359209   | 13 | 37949872 G            | 33 | 28 A     | 0.0009909 |
| rs970446    | 13 | 37951903 C            | 33 | 28 A     | 0.0009909 |
| rs1359211   | 13 | 37952685 T            | 33 | 28 C     | 0.0009909 |
| rs9603175   | 13 | 37960839 T            | 13 | 51 C     | 0.0001497 |
| rs9566217   | 13 | 37963168 G            | 13 | 50 A     | 0.0002818 |
| rs9566218   | 13 | 37964230 A            | 13 | 50 G     | 0.0002818 |
| rs2323476   | 13 | 37966084 A            | 13 | 50 G     | 0.0002818 |
| rs9576262   | 13 | 37967705 T            | 12 | 49 G     | 0.0001424 |
| rs7992271   | 13 | 40363878 C            | 9  | 1 A      | 0.0007194 |
| rs17445717  | 13 | 40369200 G            | 9  | 1 A      | 0.0007194 |
| rs2985974   | 13 | 46086763 T            | 6  | 33 C     | 0.0009098 |
| rs1998789   | 13 | 46091363 T            | 5  | 31 C     | 0.0006549 |
| rs9535559   | 13 | 51613977 G            | 40 | 39 C     | 0.0006806 |
| rs9568615   | 13 | 52080884 A            | 11 | 43 C     | 0.0008678 |
| 13:52085316 | 13 | 52085316 AGGATTGACTTG | 7  | 36 A     | 0.0003589 |
| rs148731067 | 13 | 52086145 C            | 12 | 46 T     | 0.0005428 |
| rs12861627  | 13 | 52090275 A            | 12 | 46 G     | 0.0005428 |
| rs12875314  | 13 | 52096145 G            | 12 | 46 A     | 0.0005428 |
| rs9526776   | 13 | 52097905 T            | 12 | 46 A     | 0.0005428 |
| rs1913223   | 13 | 65370523 A            | 8  | 0 T      | 0.0003016 |
| rs9592365   | 13 | 65381616 A            | 8  | 0 G      | 0.0003016 |
| rs9592366   | 13 | 65382906 A            | 8  | 0 G      | 0.0003016 |
| rs117707305 | 13 | 65383451 T            | 8  | 0 C      | 0.0003016 |
| rs143420078 | 13 | 67787159 T            | 7  | 0 C      | 0.0008679 |
| rs45527937  | 13 | 67801532 G            | 7  | 0 A      | 0.0008679 |
| rs117179968 | 13 | 68160758 A            | 9  | 1 G      | 0.0007194 |
| rs6562505   | 13 | 68202087 T            | 14 | 5 A      | 0.0008508 |
| rs1977681   | 13 | 68206479 C            | 14 | 5 T      | 0.0008508 |
| rs78853777  | 13 | 68213008 G            | 14 | 5 GC     | 0.0008508 |
| rs11839142  | 13 | 68216276 G            | 14 | 5 A      | 0.0008508 |
| rs56840064  | 13 | 68217594 A            | 14 | 5 G      | 0.0008508 |
| rs11842763  | 13 | 68218114 T            | 14 | 5 G      | 0.0008508 |
| rs55773544  | 13 | 68219611 T            | 14 | 5 C      | 0.0008508 |
| rs73509529  | 13 | 68224831 C            | 14 | 5 T      | 0.0008508 |
| rs56906756  | 13 | 68234875 A            | 14 | 5 T      | 0.0008508 |

|             |    |               |    |       |           |
|-------------|----|---------------|----|-------|-----------|
| rs76113651  | 13 | 68236187 C    | 14 | 5 T   | 0.0008508 |
| rs78508177  | 13 | 68301306 A    | 9  | 1 G   | 0.0007194 |
| rs79934772  | 13 | 70825234 CA   | 9  | 1 C   | 0.0007194 |
| rs181389845 | 13 | 70861807 G    | 7  | 0 A   | 0.0008679 |
| rs201127657 | 13 | 79012524 ACG  | 0  | 20 A  | 0.0000355 |
| 13:79012528 | 13 | 79012528 G    | 0  | 18 A  | 0.0001234 |
| rs9530835   | 13 | 79497589 A    | 5  | 34 G  | 0.0001138 |
| rs1361540   | 13 | 79497895 G    | 5  | 32 A  | 0.0003626 |
| rs4090350   | 13 | 79498089 G    | 5  | 33 C  | 0.0002023 |
| rs12560651  | 13 | 79499225 A    | 5  | 33 C  | 0.0002023 |
| rs1341133   | 13 | 79499934 A    | 5  | 34 T  | 0.0001138 |
| rs1341134   | 13 | 79499999 C    | 6  | 34 T  | 0.0005004 |
| rs1341135   | 13 | 79500382 T    | 5  | 33 C  | 0.0002023 |
| rs1341136   | 13 | 79500420 C    | 5  | 33 T  | 0.0002023 |
| rs8000648   | 13 | 79500718 T    | 6  | 34 C  | 0.0005004 |
| rs1934947   | 13 | 79501374 C    | 5  | 34 T  | 0.0001138 |
| rs9601138   | 13 | 79502310 A    | 5  | 33 G  | 0.0002023 |
| rs142985247 | 13 | 79502512 C    | 5  | 33 CA | 0.0007114 |
| rs9544925   | 13 | 79502760 T    | 6  | 34 C  | 0.0005004 |
| rs4511422   | 13 | 79504472 C    | 6  | 34 T  | 0.0005004 |
| rs1112425   | 13 | 79504570 C    | 6  | 34 A  | 0.0005004 |
| rs1417671   | 13 | 79504575 C    | 5  | 33 T  | 0.0002023 |
| rs1417673   | 13 | 79504811 T    | 5  | 33 C  | 0.0002023 |
| rs9544926   | 13 | 79505489 A    | 5  | 32 G  | 0.0003626 |
| rs9544927   | 13 | 79505864 G    | 5  | 33 A  | 0.0002023 |
| rs7325470   | 13 | 79508437 C    | 6  | 34 A  | 0.0005004 |
| rs2027425   | 13 | 79509217 C    | 5  | 32 T  | 0.0003626 |
| rs7320273   | 13 | 79510572 C    | 5  | 32 T  | 0.0003626 |
| rs1539008   | 13 | 79512338 T    | 5  | 33 C  | 0.0002023 |
| rs7322004   | 13 | 79519992 A    | 6  | 32 G  | 0.00098   |
| rs1304128   | 13 | 79520477 A    | 5  | 32 G  | 0.0003626 |
| rs4884117   | 13 | 79522117 T    | 5  | 33 C  | 0.0002023 |
| rs7997078   | 13 | 82312698 A    | 13 | 49 G  | 0.0003246 |
| rs9561492   | 13 | 87689497 A    | 30 | 23 T  | 0.0007082 |
| rs55848046  | 13 | 87720203 TATC | 30 | 22 T  | 0.0001613 |
| rs9590304   | 13 | 87842918 G    | 5  | 31 A  | 0.0006549 |
| rs60786638  | 13 | 87848266 G    | 5  | 31 GT | 0.0006549 |
| rs4238212   | 13 | 88107344 C    | 16 | 54 T  | 0.0003907 |
| rs9517402   | 13 | 88151735 C    | 13 | 48 T  | 0.0005647 |
| rs9517403   | 13 | 88151738 C    | 13 | 48 T  | 0.0005647 |
| rs1340830   | 13 | 88151753 T    | 13 | 48 A  | 0.0005647 |



|             |    |              |    |        |           |
|-------------|----|--------------|----|--------|-----------|
| rs1340834   | 13 | 88155298 G   | 13 | 48 A   | 0.0005647 |
| rs7993966   | 13 | 88161748 G   | 13 | 48 T   | 0.0005647 |
| rs2774188   | 13 | 89815375 T   | 3  | 27 C   | 0.0002808 |
| rs59445483  | 13 | 89817214 T   | 4  | 28 TTA | 0.0008078 |
| rs1373729   | 13 | 89854996 T   | 4  | 28 C   | 0.0008078 |
| rs397192    | 13 | 89894463 T   | 3  | 26 A   | 0.0005074 |
| rs364362    | 13 | 89894648 T   | 3  | 25 C   | 0.0009258 |
| rs2781301   | 13 | 89895783 C   | 4  | 28 G   | 0.0008078 |
| rs2781302   | 13 | 89896514 A   | 3  | 26 G   | 0.0005074 |
| rs143797518 | 13 | 89911252 G   | 3  | 25 GT  | 0.0009258 |
| rs191140    | 13 | 89915036 T   | 3  | 25 C   | 0.0009258 |
| rs182607    | 13 | 89915169 T   | 3  | 25 G   | 0.0009258 |
| rs167546    | 13 | 89915230 A   | 3  | 25 G   | 0.0009258 |
| rs221316    | 13 | 89915578 G   | 3  | 25 A   | 0.0009258 |
| rs314520    | 13 | 89916502 G   | 3  | 25 A   | 0.0009258 |
| rs314522    | 13 | 89917083 A   | 3  | 25 G   | 0.0009258 |
| rs78603082  | 13 | 89934258 T   | 3  | 26 A   | 0.0005074 |
| rs185327044 | 13 | 89935312 T   | 3  | 26 C   | 0.0005074 |
| rs77269664  | 13 | 89937844 A   | 3  | 26 T   | 0.0005074 |
| rs78808880  | 13 | 89938279 G   | 3  | 26 A   | 0.0005074 |
| rs75321300  | 13 | 89938776 T   | 3  | 26 C   | 0.0005074 |
| rs78304741  | 13 | 89938954 A   | 3  | 26 G   | 0.0005074 |
| rs74356458  | 13 | 89948951 T   | 3  | 26 C   | 0.0005074 |
| rs77576439  | 13 | 89951091 C   | 3  | 26 G   | 0.0005074 |
| rs75925780  | 13 | 89951263 C   | 3  | 26 T   | 0.0005074 |
| rs75399994  | 13 | 89951946 G   | 3  | 26 A   | 0.0005074 |
| rs77540614  | 13 | 89952335 C   | 3  | 26 A   | 0.0005074 |
| rs75868821  | 13 | 89952354 C   | 3  | 26 T   | 0.0005074 |
| rs79703267  | 13 | 89952637 T   | 2  | 24 A   | 0.0002818 |
| rs76579177  | 13 | 89954677 C   | 3  | 26 T   | 0.0005074 |
| rs78421246  | 13 | 89956345 A   | 3  | 26 G   | 0.0005074 |
| rs74871833  | 13 | 89959457 A   | 3  | 26 G   | 0.0005074 |
| rs75263180  | 13 | 89963336 T   | 3  | 26 C   | 0.0005074 |
| rs117514867 | 13 | 89970443 T   | 3  | 26 C   | 0.0005074 |
| rs7993692   | 13 | 90642252 G   | 8  | 38 T   | 0.0005059 |
| 13:95469735 | 13 | 95469735 A   | 0  | 17 ATC | 0.0002606 |
| 13:95469737 | 13 | 95469737 A   | 0  | 17 C   | 0.0002606 |
| rs9557686   | 13 | 102184287 G  | 23 | 14 A   | 0.0007414 |
| rs72659103  | 13 | 102221421 T  | 22 | 12 A   | 0.000477  |
| rs11450872  | 13 | 102229315 AG | 19 | 9 A    | 0.0009219 |
| rs9518452   | 13 | 102229814 T  | 23 | 14 C   | 0.0007414 |

|              |    |                         |    |       |            |
|--------------|----|-------------------------|----|-------|------------|
| rs7982227    | 13 | 102230866 A             | 23 | 14 G  | 0.0007414  |
| rs139563621  | 13 | 102233361 AT            | 23 | 14 A  | 0.0007414  |
| rs9513922    | 13 | 102236446 C             | 23 | 14 G  | 0.0007414  |
| rs4771404    | 13 | 102236713 A             | 23 | 14 G  | 0.0007414  |
| rs4771405    | 13 | 102236957 A             | 23 | 14 G  | 0.0007414  |
| rs4329783    | 13 | 102243357 G             | 23 | 14 A  | 0.0007414  |
| rs9557710    | 13 | 102246839 C             | 31 | 25 T  | 0.0008555  |
| rs9554809    | 13 | 102247971 G             | 31 | 25 A  | 0.0008555  |
| rs1583526    | 13 | 102249625 G             | 31 | 25 T  | 0.0008555  |
| rs9585734    | 13 | 102252461 A             | 31 | 25 C  | 0.0008555  |
| 13:102257790 | 13 | 102257790 GCGTATATATACA | 23 | 17 G  | 0.0008033  |
| rs114819883  | 13 | 102257824 G             | 31 | 19 C  | 0.00002421 |
| rs4144376    | 13 | 102262631 A             | 31 | 24 C  | 0.0004543  |
| rs7999749    | 13 | 102263382 A             | 27 | 16 G  | 0.0001457  |
| rs9557712    | 13 | 102264251 G             | 31 | 25 A  | 0.0008555  |
| rs7139608    | 13 | 102267424 C             | 32 | 25 A  | 0.0004454  |
| rs4772402    | 13 | 102268562 G             | 24 | 15 T  | 0.0005235  |
| rs4772403    | 13 | 102268639 T             | 32 | 25 C  | 0.0004454  |
| rs58393947   | 13 | 102269161 G             | 32 | 25 C  | 0.0004454  |
| rs7324511    | 13 | 102270623 A             | 32 | 25 G  | 0.0004454  |
| rs9557713    | 13 | 102270675 A             | 32 | 26 G  | 0.0008799  |
| rs9557714    | 13 | 102270794 A             | 32 | 25 G  | 0.0004454  |
| rs9582510    | 13 | 102271110 C             | 32 | 25 G  | 0.0004454  |
| rs4238229    | 13 | 102271715 T             | 24 | 15 C  | 0.0005235  |
| rs1982142    | 13 | 102272356 A             | 28 | 16 G  | 0.00003871 |
| rs7338172    | 13 | 102272550 G             | 24 | 15 A  | 0.0005235  |
| rs1125871    | 13 | 102272954 A             | 24 | 15 C  | 0.0005235  |
| rs1125872    | 13 | 102273822 A             | 32 | 25 G  | 0.0004454  |
| rs1925993    | 13 | 102275744 C             | 24 | 15 T  | 0.0005235  |
| rs1836843    | 13 | 102276430 G             | 24 | 15 T  | 0.0005235  |
| rs1436260    | 13 | 102276717 A             | 28 | 16 G  | 0.00003871 |
| rs4451831    | 13 | 102276769 G             | 32 | 25 A  | 0.0004454  |
| rs35177518   | 13 | 102277908 A             | 22 | 13 AT | 0.0006749  |
| rs7982014    | 13 | 102282005 T             | 27 | 18 A  | 0.0004001  |
| rs7995030    | 13 | 102287484 C             | 31 | 25 T  | 0.0008555  |
| 13:102563194 | 13 | 102563194 T             | 19 | 8 G   | 0.0003856  |
| rs9300718    | 13 | 102866294 G             | 9  | 1 T   | 0.0007194  |
| rs58604229   | 13 | 102890429 C             | 9  | 1 T   | 0.0007194  |
| rs57997300   | 13 | 102891220 G             | 9  | 1 T   | 0.0007194  |
| rs9518684    | 13 | 102895729 C             | 9  | 1 T   | 0.0007194  |
| rs12430941   | 13 | 102898489 T             | 9  | 1 C   | 0.0007194  |

|              |    |                        |    |      |             |
|--------------|----|------------------------|----|------|-------------|
| rs9514002    | 13 | 102901347 T            | 9  | 1 A  | 0.0007194   |
| rs9518685    | 13 | 102905268 C            | 9  | 1 T  | 0.0007194   |
| rs72647461   | 13 | 102937184 C            | 9  | 1 T  | 0.0007194   |
| rs72647467   | 13 | 102944229 T            | 9  | 1 C  | 0.0007194   |
| rs12430169   | 13 | 102948379 C            | 9  | 1 G  | 0.0007194   |
| rs72647476   | 13 | 102970018 C            | 9  | 1 G  | 0.0007194   |
| rs72647477   | 13 | 102970128 G            | 9  | 1 C  | 0.0007194   |
| 13:107735084 | 13 | 107735084 GT           | 36 | 24 G | 0.000005973 |
| 13:107735085 | 13 | 107735085 T            | 34 | 24 A | 0.00001993  |
| 13:107735086 | 13 | 107735086 AGAGTAGAGTAG | 36 | 24 A | 0.000005973 |
| rs77555188   | 13 | 110553810 G            | 11 | 2 A  | 0.0004434   |
| rs1889775    | 13 | 110595596 G            | 11 | 2 T  | 0.0004434   |
| rs79715145   | 13 | 110598569 A            | 11 | 2 G  | 0.0004434   |
| rs7337066    | 13 | 110630181 C            | 11 | 2 T  | 0.0004434   |
| rs75270145   | 13 | 110630767 T            | 11 | 2 C  | 0.0004434   |
| rs7320126    | 13 | 110632935 T            | 11 | 2 C  | 0.0004434   |
| rs75979907   | 13 | 110635054 T            | 11 | 2 C  | 0.0004434   |
| rs3742209    | 13 | 110638360 A            | 11 | 2 G  | 0.0004434   |
| rs76903621   | 13 | 110638738 T            | 11 | 2 C  | 0.0004434   |
| rs74441026   | 13 | 110640241 G            | 11 | 2 C  | 0.0004434   |
| rs75343535   | 13 | 110642379 T            | 11 | 2 G  | 0.0004434   |
| rs183711260  | 13 | 110644456 T            | 11 | 2 A  | 0.0004434   |
| rs76312859   | 13 | 110645201 G            | 11 | 2 A  | 0.0004434   |
| rs144036587  | 13 | 110645641 C            | 11 | 2 A  | 0.0004434   |
| rs79751079   | 13 | 110647902 A            | 11 | 2 T  | 0.0004434   |
| rs76743258   | 13 | 110648047 T            | 11 | 2 C  | 0.0004434   |
| rs74995538   | 13 | 110648682 T            | 11 | 2 C  | 0.0004434   |
| rs187349184  | 13 | 110648837 A            | 11 | 2 C  | 0.0004434   |
| rs150709813  | 13 | 110649274 A            | 11 | 2 AT | 0.0004434   |
| rs77984166   | 13 | 110650041 G            | 11 | 2 A  | 0.0004434   |
| rs143872776  | 13 | 110651735 CT           | 11 | 2 C  | 0.0004434   |
| rs76847385   | 13 | 110652990 G            | 11 | 2 A  | 0.0004434   |
| rs75424296   | 13 | 110653121 C            | 11 | 2 A  | 0.0004434   |
| rs73617001   | 13 | 110662426 A            | 10 | 0 C  | 0.00003497  |
| rs73618805   | 13 | 110664426 G            | 9  | 1 C  | 0.0007194   |
| rs9550152    | 13 | 113233836 A            | 24 | 15 G | 0.0009958   |
| rs12876871   | 13 | 114201576 A            | 5  | 37 T | 0.00002706  |
| rs9549811    | 13 | 114205883 T            | 6  | 35 A | 0.0002764   |
| rs7989136    | 13 | 114827017 T            | 15 | 51 C | 0.0009773   |
| rs9805859    | 13 | 114887910 T            | 16 | 53 C | 0.0006806   |
| rs7982070    | 13 | 115064685 G            | 3  | 31 A | 0.00003786  |

|             |    |            |    |       |           |
|-------------|----|------------|----|-------|-----------|
| 14:19072247 | 14 | 19072247 A | 5  | 33 AT | 0.0002023 |
| rs12881322  | 14 | 22260754 C | 37 | 34 T  | 0.0006983 |
| rs11621382  | 14 | 22260788 C | 37 | 34 T  | 0.0006983 |
| rs11624799  | 14 | 22260795 A | 37 | 34 C  | 0.0006983 |
| rs12895584  | 14 | 22260810 A | 37 | 34 G  | 0.0006983 |
| rs11625436  | 14 | 22260893 A | 37 | 34 G  | 0.0006983 |
| rs2733763   | 14 | 22267491 T | 39 | 36 C  | 0.0003692 |
| rs7159790   | 14 | 22325185 T | 32 | 26 A  | 0.000927  |
| rs4982518   | 14 | 22333119 A | 17 | 55 C  | 0.000662  |
| rs909076    | 14 | 22337181 T | 17 | 55 C  | 0.000662  |
| rs12885199  | 14 | 22378708 A | 37 | 31 G  | 0.0001688 |
| rs61980339  | 14 | 33448386 C | 9  | 1 A   | 0.0007194 |
| rs72682330  | 14 | 34041274 G | 11 | 2 A   | 0.0004434 |
| rs28444441  | 14 | 34041296 G | 11 | 2 A   | 0.0004434 |
| rs28407670  | 14 | 34041345 G | 11 | 2 A   | 0.0004434 |
| rs61421949  | 14 | 34116500 C | 17 | 6 A   | 0.0002592 |
| rs797383    | 14 | 34538112 T | 12 | 45 C  | 0.0009266 |
| rs1088254   | 14 | 34611351 T | 18 | 9 C   | 0.0009279 |
| rs140502759 | 14 | 34619584 C | 18 | 9 T   | 0.0009279 |
| rs149154061 | 14 | 34620268 C | 18 | 9 T   | 0.0009279 |
| rs8006604   | 14 | 34621153 C | 18 | 9 T   | 0.0009279 |
| rs8005825   | 14 | 34621412 T | 18 | 9 C   | 0.0009279 |
| rs2915277   | 14 | 34621700 C | 18 | 9 T   | 0.0009279 |
| rs146533521 | 14 | 34621909 T | 18 | 9 C   | 0.0009279 |
| rs9672128   | 14 | 34624304 G | 18 | 9 C   | 0.0009279 |
| rs9671224   | 14 | 34624527 T | 23 | 14 G  | 0.0007414 |
| rs9671225   | 14 | 34624830 C | 22 | 13 A  | 0.0006749 |
| rs11845203  | 14 | 35157104 G | 27 | 19 A  | 0.0008555 |
| rs11627959  | 14 | 35160471 A | 34 | 28 C  | 0.00053   |
| rs8003414   | 14 | 35170800 C | 34 | 28 T  | 0.00053   |
| rs12883300  | 14 | 35171218 G | 34 | 28 A  | 0.00053   |
| rs61981195  | 14 | 35172966 G | 30 | 23 A  | 0.0007082 |
| rs10143298  | 14 | 35177986 G | 29 | 22 A  | 0.0005519 |
| rs712301    | 14 | 35180389 T | 34 | 28 A  | 0.00053   |
| rs61981198  | 14 | 35220605 G | 7  | 38 A  | 0.0001991 |
| rs112182670 | 14 | 35223413 A | 7  | 36 G  | 0.0003589 |
| rs8005659   | 14 | 35223956 G | 10 | 43 A  | 0.0003854 |
| rs8016548   | 14 | 35225483 T | 10 | 42 C  | 0.0006808 |
| rs61981202  | 14 | 35228090 A | 8  | 38 G  | 0.0005059 |
| rs59678582  | 14 | 35235160 A | 10 | 43 G  | 0.0003854 |
| rs10150083  | 14 | 35238045 C | 10 | 42 G  | 0.0006808 |

|             |    |                   |    |        |            |
|-------------|----|-------------------|----|--------|------------|
| rs12435859  | 14 | 35242391 T        | 10 | 43 C   | 0.0003854  |
| rs7153289   | 14 | 35246534 T        | 10 | 43 C   | 0.0003854  |
| rs35217207  | 14 | 35261589 CA       | 6  | 37 C   | 0.0001336  |
| rs112562212 | 14 | 35271057 G        | 8  | 38 A   | 0.0008595  |
| rs5807801   | 14 | 35343464 A        | 30 | 20 AC  | 0.0005523  |
| rs8012618   | 14 | 47542996 A        | 7  | 0 G    | 0.0008679  |
| rs35411710  | 14 | 50948012 C        | 0  | 15 A   | 0.0005628  |
| rs4901835   | 14 | 58495312 T        | 19 | 58 C   | 0.0006983  |
| rs7148795   | 14 | 58495849 C        | 19 | 58 T   | 0.0006983  |
| 14:59729372 | 14 | 59729372 T        | 18 | 8 G    | 0.0006346  |
| rs200067221 | 14 | 63993887 CA       | 7  | 0 C    | 0.0008679  |
| rs11623044  | 14 | 66373688 G        | 7  | 0 A    | 0.0008679  |
| rs11621520  | 14 | 66382895 G        | 7  | 0 A    | 0.0008679  |
| rs12891482  | 14 | 66396885 T        | 11 | 2 A    | 0.0004434  |
| 14:70345440 | 14 | 70345440 C        | 4  | 30 G   | 0.0002225  |
| rs8008001   | 14 | 76583051 C        | 1  | 19 T   | 0.0008417  |
| 14:78492143 | 14 | 78492143 TGTGTGTC | 5  | 35 T   | 0.00009992 |
| rs4903706   | 14 | 78556272 G        | 35 | 30 A   | 0.0005835  |
| rs145898678 | 14 | 82301150 G        | 13 | 4 A    | 0.0006916  |
| rs7144544   | 14 | 84969785 A        | 11 | 43 C   | 0.0008678  |
| rs10143465  | 14 | 84971413 T        | 11 | 43 C   | 0.0008678  |
| rs10646499  | 14 | 90129322 C        | 36 | 32 CTG | 0.0006397  |
| rs2632191   | 14 | 90132482 C        | 37 | 32 T   | 0.0003248  |
| rs2018763   | 14 | 90132951 A        | 29 | 22 G   | 0.0007063  |
| rs12587740  | 14 | 90135343 T        | 36 | 32 C   | 0.0006397  |
| rs998564    | 14 | 90139311 C        | 36 | 31 T   | 0.0003502  |
| rs2896113   | 14 | 90139991 C        | 36 | 31 T   | 0.0003502  |
| rs1967774   | 14 | 90142951 A        | 16 | 59 G   | 0.0001347  |
| rs732914    | 14 | 90148522 A        | 36 | 31 G   | 0.0003502  |
| rs8006462   | 14 | 90878676 T        | 31 | 20 C   | 0.00004024 |
| rs12881551  | 14 | 90878880 A        | 37 | 32 G   | 0.0003248  |
| rs4904689   | 14 | 90879761 G        | 37 | 32 A   | 0.0003248  |
| rs2896135   | 14 | 90880740 G        | 35 | 27 A   | 0.0001338  |
| rs12891145  | 14 | 90883069 G        | 37 | 33 A   | 0.0006234  |
| rs759061    | 14 | 90883818 C        | 35 | 28 A   | 0.0001616  |
| rs2098254   | 14 | 90884018 C        | 31 | 21 A   | 0.00008418 |
| rs2896136   | 14 | 90898875 G        | 30 | 21 T   | 0.0001793  |
| rs4904691   | 14 | 90899020 G        | 35 | 29 A   | 0.0003069  |
| rs6575136   | 14 | 90899380 C        | 31 | 22 G   | 0.0001772  |
| 14:91692455 | 14 | 91692455 T        | 7  | 0 C    | 0.0008679  |
| rs2069963   | 14 | 95052627 T        | 6  | 34 C   | 0.0005004  |

|              |    |             |    |       |            |
|--------------|----|-------------|----|-------|------------|
| rs61993541   | 14 | 101897039 C | 27 | 17 T  | 0.000186   |
| rs190885263  | 14 | 103632418 T | 0  | 15 C  | 0.0005628  |
| 14:103632429 | 14 | 103632429 A | 0  | 15 G  | 0.0005628  |
| rs199969979  | 14 | 106170334 C | 11 | 2 T   | 0.0004571  |
| 15:20086576  | 15 | 20086576 T  | 7  | 0 TA  | 0.0008679  |
| rs137957754  | 15 | 20291576 C  | 30 | 23 T  | 0.0007875  |
| rs7164260    | 15 | 22798709 C  | 32 | 21 G  | 0.00003887 |
| rs4438262    | 15 | 27674176 C  | 24 | 15 T  | 0.0005235  |
| rs3922613    | 15 | 27682831 C  | 24 | 15 T  | 0.0005235  |
| rs372698865  | 15 | 30982225 G  | 0  | 17 A  | 0.0002606  |
| rs28862072   | 15 | 31995025 A  | 5  | 31 G  | 0.0006549  |
| rs12595478   | 15 | 32001295 A  | 5  | 33 G  | 0.0002023  |
| rs59487628   | 15 | 32064340 A  | 5  | 30 AG | 0.0006526  |
| rs7181402    | 15 | 33102157 T  | 12 | 45 G  | 0.0009266  |
| rs1258801    | 15 | 33104041 T  | 13 | 48 G  | 0.0005647  |
| rs1258799    | 15 | 33106027 A  | 12 | 49 C  | 0.0001424  |
| rs1258795    | 15 | 33107305 A  | 12 | 49 G  | 0.0001424  |
| rs34238593   | 15 | 34816950 G  | 10 | 40 A  | 0.0006687  |
| 15:41438169  | 15 | 41438169 G  | 8  | 0 A   | 0.0002766  |
| rs2470149    | 15 | 51612240 T  | 11 | 2 A   | 0.0004434  |
| rs2445763    | 15 | 51618307 G  | 11 | 2 A   | 0.0004434  |
| rs2470146    | 15 | 51618369 G  | 11 | 2 A   | 0.0004434  |
| rs2446404    | 15 | 51618943 C  | 11 | 2 T   | 0.0004434  |
| rs2470145    | 15 | 51619138 C  | 11 | 2 T   | 0.0004434  |
| rs17602385   | 15 | 51624730 C  | 11 | 2 T   | 0.0004434  |
| rs2470169    | 15 | 51625116 G  | 11 | 2 T   | 0.0004434  |
| rs2470165    | 15 | 51627798 T  | 11 | 2 A   | 0.0004434  |
| rs2446409    | 15 | 51628101 A  | 11 | 2 G   | 0.0004434  |
| rs2445764    | 15 | 51633517 G  | 11 | 2 A   | 0.0004434  |
| rs2445769    | 15 | 51635715 C  | 11 | 2 T   | 0.0004434  |
| rs2445770    | 15 | 51637158 A  | 11 | 2 G   | 0.0004434  |
| rs2446425    | 15 | 51639727 T  | 11 | 2 C   | 0.0004434  |
| rs2446426    | 15 | 51641156 T  | 11 | 2 C   | 0.0004434  |
| rs2470162    | 15 | 51643567 G  | 11 | 2 C   | 0.0004434  |
| rs2470161    | 15 | 51644669 T  | 11 | 2 C   | 0.0004434  |
| rs145619752  | 15 | 51648156 G  | 9  | 1 A   | 0.0007194  |
| rs117429898  | 15 | 54562605 A  | 7  | 0 G   | 0.0008679  |
| 15:57300052  | 15 | 57300052 C  | 8  | 41 CT | 0.0001347  |
| 15:57300054  | 15 | 57300054 T  | 8  | 39 TC | 0.0002434  |
| 15:57300056  | 15 | 57300056 T  | 8  | 40 C  | 0.0002406  |
| 15:57300066  | 15 | 57300066 C  | 8  | 38 T  | 0.0007829  |

|            |    |            |    |                       |            |
|------------|----|------------|----|-----------------------|------------|
| rs28367289 | 15 | 57868701 A | 0  | 19 G                  | 0.00006755 |
| rs35120591 | 15 | 58814992 C | 16 | 5 T                   | 0.0001588  |
| rs1968687  | 15 | 58822697 G | 15 | 5 T                   | 0.0003715  |
| rs4775073  | 15 | 58826632 T | 15 | 5 C                   | 0.0003715  |
| rs3803448  | 15 | 59427200 C | 2  | 22 T                  | 0.0009583  |
| rs11286231 | 15 | 59441673 A | 8  | 37 AT                 | 0.0008686  |
| rs7178642  | 15 | 65513562 C | 35 | 28 T                  | 0.0001616  |
| rs36013682 | 15 | 65515981 G | 35 | 27 A                  | 0.0001338  |
| rs12901822 | 15 | 65518320 T | 35 | 28 C                  | 0.0001616  |
| rs7170648  | 15 | 65518971 C | 35 | 28 T                  | 0.0001616  |
| rs6494512  | 15 | 65519389 G | 35 | 28 T                  | 0.0001616  |
| rs12903067 | 15 | 65520087 A | 35 | 28 G                  | 0.0001616  |
| rs4776261  | 15 | 65522320 T | 35 | 28 C                  | 0.0001616  |
| rs2083726  | 15 | 65525146 A | 35 | 28 C                  | 0.0001616  |
| rs2120014  | 15 | 65533541 C | 36 | 32 T                  | 0.0006397  |
| rs12148373 | 15 | 65534289 G | 36 | 32 A                  | 0.0006397  |
| rs12593488 | 15 | 65535341 T | 36 | 32 C                  | 0.0006397  |
| rs4776676  | 15 | 65536316 A | 36 | 32 T                  | 0.0006397  |
| rs1561890  | 15 | 65539407 T | 36 | 31 C                  | 0.0003502  |
| rs8029480  | 15 | 65540299 T | 36 | 31 C                  | 0.0003502  |
| rs34711258 | 15 | 65543186 T | 36 | 31 C                  | 0.0003502  |
| rs11270085 | 15 | 65543940 G | 36 | 31 GGATCCCCAGCAAACTTA | 0.0003502  |
| rs4776262  | 15 | 65544293 A | 36 | 31 G                  | 0.0003502  |
| rs12906430 | 15 | 65548870 T | 36 | 31 C                  | 0.0003502  |
| rs2414879  | 15 | 65549457 T | 36 | 31 C                  | 0.0003502  |
| rs1961279  | 15 | 65554740 A | 36 | 30 G                  | 0.000303   |
| rs894494   | 15 | 65556442 C | 36 | 30 T                  | 0.000303   |
| rs10467935 | 15 | 65561077 T | 36 | 29 C                  | 0.0001509  |
| rs10467936 | 15 | 65561155 T | 35 | 30 C                  | 0.0005835  |
| rs8023288  | 15 | 65561829 A | 36 | 30 C                  | 0.000303   |
| rs7167901  | 15 | 65562811 G | 36 | 30 A                  | 0.000303   |
| rs1982257  | 15 | 65563649 C | 36 | 30 T                  | 0.000303   |
| rs8032837  | 15 | 65567436 A | 36 | 29 C                  | 0.000174   |
| rs10083573 | 15 | 65569083 C | 36 | 30 T                  | 0.000303   |
| rs62012559 | 15 | 65569302 C | 36 | 28 A                  | 0.0001393  |
| rs62014960 | 15 | 65569312 A | 35 | 28 C                  | 0.000282   |
| rs4776679  | 15 | 65569933 G | 36 | 30 C                  | 0.000303   |
| rs4776680  | 15 | 65571977 G | 36 | 30 A                  | 0.000303   |
| rs2899707  | 15 | 65575585 C | 36 | 30 G                  | 0.000303   |
| rs34440719 | 15 | 65577548 T | 36 | 30 TCAC               | 0.000303   |
| rs1057254  | 15 | 65579033 A | 35 | 28 G                  | 0.000282   |

|             |    |             |    |               |            |
|-------------|----|-------------|----|---------------|------------|
| rs7171823   | 15 | 65580983 C  | 36 | 30 T          | 0.000303   |
| rs7162046   | 15 | 65618532 A  | 36 | 32 C          | 0.0006397  |
| rs2013609   | 15 | 67253339 A  | 38 | 30 C          | 0.00003943 |
| rs444141    | 15 | 67253847 G  | 38 | 30 C          | 0.00003943 |
| rs871505    | 15 | 69429674 G  | 15 | 51 A          | 0.0006974  |
| rs55747964  | 15 | 73031102 C  | 10 | 1 A           | 0.0002681  |
| rs35062240  | 15 | 80979987 G  | 8  | 0 A           | 0.0003016  |
| rs199976048 | 15 | 86780174 G  | 11 | 46 GGGGGGGGGC | 0.0003773  |
| rs77122263  | 15 | 90069444 G  | 11 | 2 A           | 0.0004434  |
| 15:91179398 | 15 | 91179398 T  | 13 | 3 G           | 0.0002409  |
| rs11629627  | 15 | 96608104 T  | 6  | 34 C          | 0.0005004  |
| rs11629694  | 15 | 96608137 A  | 6  | 37 G          | 0.00008623 |
| rs12901938  | 15 | 96621035 T  | 23 | 14 C          | 0.0007414  |
| rs4998382   | 15 | 99331289 C  | 18 | 6 G           | 0.0000668  |
| rs7165207   | 15 | 99619610 A  | 19 | 9 G           | 0.0004395  |
| rs8038925   | 15 | 99621043 A  | 20 | 9 T           | 0.0002046  |
| rs1509157   | 15 | 99623607 T  | 20 | 9 C           | 0.0002046  |
| rs62023819  | 15 | 99625603 G  | 20 | 10 A          | 0.0005561  |
| rs10459737  | 15 | 99626170 T  | 20 | 9 C           | 0.0002046  |
| rs1551244   | 15 | 99629260 A  | 19 | 8 G           | 0.0002919  |
| rs79274204  | 15 | 100459748 C | 7  | 0 A           | 0.0008679  |
| rs112312792 | 15 | 102132563 A | 7  | 0 G           | 0.0009566  |
| rs2294444   | 16 | 1724693 G   | 3  | 26 T          | 0.0005074  |
| rs11248888  | 16 | 1779399 G   | 0  | 16 C          | 0.0005294  |
| rs34520001  | 16 | 1779444 AG  | 0  | 17 A          | 0.0002606  |
| rs12920634  | 16 | 1779695 T   | 0  | 16 C          | 0.0005294  |
| rs146273776 | 16 | 1788588 C   | 0  | 14 T          | 0.0008416  |
| rs35545084  | 16 | 1790297 A   | 0  | 14 G          | 0.0009501  |
| rs2294613   | 16 | 1797050 T   | 0  | 16 C          | 0.0005294  |
| rs747254    | 16 | 1802518 G   | 0  | 16 A          | 0.0005294  |
| rs4786801   | 16 | 6064447 C   | 15 | 5 G           | 0.0003715  |
| rs12924078  | 16 | 6281970 T   | 9  | 1 C           | 0.0007194  |
| rs9940011   | 16 | 6282896 T   | 24 | 15 G          | 0.0005235  |
| rs9927038   | 16 | 6283311 G   | 25 | 15 C          | 0.0002543  |
| rs12930199  | 16 | 6283321 G   | 25 | 16 A          | 0.0005585  |
| rs143294556 | 16 | 7149149 A   | 7  | 0 AAGTT       | 0.0008679  |
| 16:7155779  | 16 | 7155779 A   | 8  | 0 ATG         | 0.000247   |
| 16:7155788  | 16 | 7155788 GAT | 8  | 0 G           | 0.000247   |
| rs201756757 | 16 | 13267014 G  | 7  | 0 A           | 0.0008679  |
| rs57819322  | 16 | 16212817 G  | 7  | 0 C           | 0.0008679  |
| 16:20886534 | 16 | 20886534 G  | 26 | 12 A          | 0.00001225 |



|             |    |             |    |         |                |
|-------------|----|-------------|----|---------|----------------|
| rs7184277   | 16 | 23955242 C  | 0  | 16 T    | 0.0005294      |
| rs142864473 | 16 | 24757122 CG | 7  | 0 C     | 0.0008679      |
| rs4787795   | 16 | 26021604 A  | 37 | 32 G    | 0.0003248      |
| rs7189364   | 16 | 26021731 T  | 36 | 32 C    | 0.0006397      |
| rs3925102   | 16 | 26032650 A  | 35 | 29 G    | 0.0003069      |
| 16:32600808 | 16 | 32600808 A  | 2  | 23 T    | 0.0004813      |
| rs13332397  | 16 | 34175440 C  | 9  | 0 G     | 0.0001034      |
| rs202037976 | 16 | 56161190 G  | 4  | 48 A    | 0.000000005601 |
| rs34927755  | 16 | 56211091 GT | 13 | 48 G    | 0.0009655      |
| rs35869729  | 16 | 56254662 T  | 4  | 31 G    | 0.0001398      |
| rs36048827  | 16 | 56316281 AT | 8  | 37 A    | 0.0008686      |
| rs899239    | 16 | 56321119 A  | 9  | 40 G    | 0.000591       |
| 16:62122974 | 16 | 62122974 AG | 36 | 28 A    | 0.00002207     |
| rs4783644   | 16 | 66383359 C  | 12 | 2 T     | 0.0001711      |
| rs4788477   | 16 | 72754901 C  | 11 | 44 T    | 0.0007768      |
| 16:73093273 | 16 | 73093273 G  | 13 | 2 A     | 0.00006438     |
| rs200278292 | 16 | 76628424 AT | 10 | 0 A     | 0.00003497     |
| rs118048110 | 16 | 76679885 T  | 9  | 0 A     | 0.0001034      |
| rs145368075 | 16 | 76814522 G  | 10 | 1 A     | 0.0002681      |
| rs55815014  | 16 | 77567903 G  | 25 | 16 A    | 0.0005585      |
| rs881083    | 16 | 80652783 C  | 0  | 15 A    | 0.0005628      |
| rs12598873  | 16 | 81755511 C  | 7  | 36 T    | 0.0006639      |
| rs4380051   | 16 | 81765109 T  | 15 | 52 C    | 0.0006042      |
| rs254334    | 16 | 83797708 C  | 27 | 19 T    | 0.0008555      |
| rs462157    | 16 | 83821060 C  | 28 | 20 T    | 0.0005398      |
| rs1645850   | 16 | 83822305 G  | 28 | 20 C    | 0.0005398      |
| rs556974    | 16 | 83874760 C  | 25 | 16 T    | 0.0005585      |
| rs529223    | 16 | 83874823 A  | 23 | 12 C    | 0.0002434      |
| rs66658588  | 16 | 83875572 T  | 22 | 13 TA   | 0.0004884      |
| rs200190540 | 16 | 83875574 G  | 22 | 13 A    | 0.0004884      |
| rs7191122   | 16 | 83875688 G  | 25 | 16 C    | 0.000624       |
| rs366495    | 16 | 83876171 T  | 25 | 16 C    | 0.000624       |
| rs824544    | 16 | 83876991 T  | 25 | 16 G    | 0.0005585      |
| rs365942    | 16 | 83880187 A  | 20 | 11 C    | 0.0006096      |
| rs9888805   | 16 | 83907379 T  | 16 | 53 G    | 0.0006806      |
| rs247820    | 16 | 84445437 C  | 36 | 32 T    | 0.0006397      |
| rs71151211  | 16 | 84446090 A  | 18 | 8 ATGTG | 0.0005897      |
| rs17741422  | 16 | 84448418 C  | 19 | 8 T     | 0.0002919      |
| rs12149164  | 16 | 84451091 A  | 22 | 9 G     | 0.00004313     |
| rs202114647 | 16 | 84481319 T  | 16 | 7 TATA  | 0.0009539      |
| rs8062339   | 16 | 84481589 A  | 16 | 7 G     | 0.0009539      |

|             |    |             |    |           |           |
|-------------|----|-------------|----|-----------|-----------|
| rs200078985 | 16 | 84766065 T  | 7  | 0 C       | 0.0006731 |
| rs28499270  | 16 | 85567332 A  | 22 | 11 G      | 0.0001874 |
| rs8054346   | 16 | 86287812 T  | 14 | 54 C      | 0.0001045 |
| rs71388046  | 16 | 86487803 GA | 9  | 1 G       | 0.0007194 |
| rs12922134  | 16 | 86489401 A  | 10 | 1 G       | 0.0002681 |
| rs71153865  | 16 | 86490325 C  | 9  | 1 CTCTT   | 0.0007194 |
| rs34771315  | 16 | 86492690 C  | 10 | 1 G       | 0.0002681 |
| rs4843553   | 16 | 87233185 A  | 32 | 27 C      | 0.0004214 |
| rs4024019   | 17 | 1216227 C   | 5  | 33 A      | 0.0006717 |
| rs62087949  | 17 | 1283446 T   | 7  | 0 C       | 0.0008679 |
| rs7503462   | 17 | 3074176 A   | 8  | 39 T      | 0.0004628 |
| rs4564609   | 17 | 3078700 A   | 8  | 39 C      | 0.0004628 |
| rs35331788  | 17 | 3078740 A   | 8  | 39 AAG    | 0.0004628 |
| rs4542692   | 17 | 3078940 A   | 8  | 39 C      | 0.0004628 |
| rs142517458 | 17 | 3081461 T   | 9  | 40 G      | 0.000591  |
| rs201492019 | 17 | 3082412 C   | 9  | 41 A      | 0.0005847 |
| rs199689703 | 17 | 3082992 C   | 13 | 47 A      | 0.0009845 |
| rs12150595  | 17 | 3083944 G   | 9  | 40 C      | 0.000591  |
| rs4377191   | 17 | 3087015 G   | 9  | 41 A      | 0.0003404 |
| rs4581733   | 17 | 3087019 G   | 9  | 41 C      | 0.0003404 |
| rs4294846   | 17 | 3087577 A   | 9  | 41 C      | 0.0003404 |
| rs61416144  | 17 | 3089784 C   | 9  | 41 T      | 0.0003404 |
| rs60763033  | 17 | 3090136 CA  | 9  | 41 C      | 0.0003404 |
| rs4283256   | 17 | 3096508 A   | 9  | 41 T      | 0.0003404 |
| rs2241093   | 17 | 3100827 C   | 9  | 41 T      | 0.0003404 |
| rs2241091   | 17 | 3101578 T   | 9  | 41 G      | 0.0003404 |
| rs12150427  | 17 | 3101691 T   | 9  | 41 G      | 0.0003404 |
| rs9652829   | 17 | 3106087 C   | 9  | 41 T      | 0.0003404 |
| rs11652109  | 17 | 3106962 A   | 9  | 41 T      | 0.0003404 |
| rs11078439  | 17 | 3108225 T   | 9  | 41 A      | 0.0003404 |
| rs17174920  | 17 | 3119871 C   | 15 | 51 T      | 0.0006974 |
| rs2469803   | 17 | 3160405 C   | 11 | 43 A      | 0.0008678 |
| rs2459530   | 17 | 3160700 G   | 11 | 43 A      | 0.0008678 |
| rs2469802   | 17 | 3161257 G   | 11 | 43 C      | 0.0008678 |
| 17:3224740  | 17 | 3224740 T   | 7  | 0 C       | 0.0008679 |
| rs142097988 | 17 | 3381486 T   | 8  | 0 A       | 0.000247  |
| rs7218276   | 17 | 4670631 C   | 26 | 17 T      | 0.0007398 |
| 17:6333365  | 17 | 6333365 G   | 24 | 15 GT     | 0.0003949 |
| 17:6333367  | 17 | 6333367 G   | 24 | 15 GTGTGT | 0.0008364 |
| rs7212120   | 17 | 8922842 C   | 6  | 35 A      | 0.0002764 |
| rs57785525  | 17 | 9130804 G   | 0  | 15 A      | 0.0005628 |

|             |    |               |    |              |            |
|-------------|----|---------------|----|--------------|------------|
| rs7211590   | 17 | 13139032 G    | 5  | 33 A         | 0.0002023  |
| rs369619837 | 17 | 19571912 G    | 19 | 9 A          | 0.0004395  |
| 17:19571913 | 17 | 19571913 G    | 19 | 9 GAAA       | 0.0004395  |
| 17:19571918 | 17 | 19571918 G    | 19 | 8 GCTTTCCTAT | 0.0002919  |
| rs76119305  | 17 | 19605569 C    | 0  | 16 T         | 0.0005294  |
| 17:21200214 | 17 | 21200214 CTGT | 0  | 15 C         | 0.0005628  |
| rs116691607 | 17 | 28604586 T    | 7  | 0 C          | 0.0008679  |
| rs12944686  | 17 | 29930942 G    | 9  | 1 A          | 0.0007194  |
| rs12944364  | 17 | 29975200 C    | 9  | 1 T          | 0.0007194  |
| rs7222687   | 17 | 31770471 A    | 0  | 14 G         | 0.0009786  |
| rs17784068  | 17 | 32497214 C    | 9  | 1 T          | 0.0007194  |
| rs3138032   | 17 | 32689042 A    | 10 | 1 G          | 0.0002681  |
| 17:39301380 | 17 | 39301380 T    | 20 | 10 C         | 0.0005561  |
| 17:43122073 | 17 | 43122073 C    | 7  | 0 A          | 0.0008679  |
| rs370484228 | 17 | 55127061 C    | 24 | 15 T         | 0.0005235  |
| rs4794723   | 17 | 55435563 G    | 21 | 12 T         | 0.0009318  |
| rs8068233   | 17 | 55450074 A    | 21 | 12 G         | 0.0009318  |
| rs9916654   | 17 | 55452531 A    | 23 | 13 G         | 0.0003278  |
| rs11653165  | 17 | 55687346 A    | 1  | 19 G         | 0.0008417  |
| rs11079317  | 17 | 55708795 A    | 1  | 19 G         | 0.0008417  |
| rs34227181  | 17 | 59312249 C    | 2  | 27 CTTAT     | 0.000073   |
| rs12947302  | 17 | 59312394 G    | 1  | 25 A         | 0.00002992 |
| rs4793394   | 17 | 68509868 A    | 15 | 52 G         | 0.0006042  |
| rs4793395   | 17 | 68509948 C    | 15 | 52 T         | 0.0006042  |
| rs9894256   | 17 | 68511145 A    | 15 | 52 G         | 0.0006042  |
| rs415298    | 17 | 68569973 G    | 34 | 29 A         | 0.0006139  |
| rs72631364  | 17 | 71069438 T    | 14 | 4 C          | 0.0003939  |
| rs138367737 | 17 | 71498221 C    | 14 | 4 CAT        | 0.0003939  |
| 17:73169571 | 17 | 73169571 CG   | 8  | 0 C          | 0.000252   |
| rs346802    | 17 | 74383601 T    | 8  | 0 C          | 0.0003016  |
| rs346801    | 17 | 74383678 A    | 8  | 0 G          | 0.0003016  |
| rs346800    | 17 | 74384072 G    | 8  | 0 A          | 0.0003016  |
| rs346799    | 17 | 74384123 A    | 8  | 0 G          | 0.0003016  |
| rs76754708  | 17 | 74384593 T    | 8  | 0 C          | 0.0003016  |
| rs346816    | 17 | 74390938 G    | 8  | 0 A          | 0.0003016  |
| rs346817    | 17 | 74396486 A    | 8  | 0 G          | 0.0003016  |
| rs453116    | 17 | 74401804 A    | 8  | 0 C          | 0.0003016  |
| rs346810    | 17 | 74405114 A    | 8  | 0 G          | 0.0003016  |
| rs346808    | 17 | 74405286 A    | 8  | 0 G          | 0.0003016  |
| rs346807    | 17 | 74408046 C    | 8  | 0 T          | 0.0003016  |
| rs381774    | 17 | 74411788 A    | 8  | 0 G          | 0.0003016  |

|             |    |                       |    |           |            |
|-------------|----|-----------------------|----|-----------|------------|
| rs377253    | 17 | 74413155 C            | 8  | 0 G       | 0.0003016  |
| rs443112    | 17 | 74413899 A            | 8  | 0 G       | 0.0003016  |
| rs369654    | 17 | 74416147 T            | 8  | 0 C       | 0.0003016  |
| rs560924    | 17 | 74416431 A            | 8  | 0 G       | 0.0003016  |
| rs144685854 | 17 | 74425173 A            | 8  | 0 G       | 0.0003016  |
| rs146627981 | 17 | 74429265 C            | 8  | 0 CACA    | 0.0003016  |
| rs12165049  | 17 | 74431465 C            | 8  | 0 T       | 0.0003016  |
| rs495055    | 17 | 74440890 G            | 8  | 0 A       | 0.0003016  |
| rs493035    | 17 | 74441157 T            | 8  | 0 C       | 0.0003016  |
| rs201664546 | 17 | 74442551 C            | 9  | 0 A       | 0.0001034  |
| rs619907    | 17 | 74445776 A            | 8  | 0 G       | 0.0003016  |
| rs28709924  | 17 | 74448395 G            | 8  | 0 C       | 0.0003016  |
| rs28615986  | 17 | 74451270 C            | 8  | 0 G       | 0.0003016  |
| rs73996395  | 17 | 74455248 C            | 8  | 0 T       | 0.0003016  |
| rs9912178   | 17 | 77445148 C            | 19 | 58 T      | 0.0006983  |
| rs9912221   | 17 | 77445186 C            | 18 | 57 T      | 0.0006427  |
| rs8068701   | 17 | 81039239 C            | 15 | 53 A      | 0.0003298  |
| rs12957723  | 18 | 325884 A              | 0  | 16 G      | 0.0005294  |
| rs8086678   | 18 | 905887 T              | 8  | 0 C       | 0.0003016  |
| rs7239044   | 18 | 3965251 G             | 9  | 1 A       | 0.0007194  |
| rs7243307   | 18 | 3965318 A             | 9  | 1 T       | 0.0007194  |
| rs190474398 | 18 | 5499832 G             | 18 | 7 A       | 0.0001719  |
| rs4797378   | 18 | 9440382 C             | 13 | 47 G      | 0.0009845  |
| rs12604351  | 18 | 13593728 G            | 7  | 0 A       | 0.0008679  |
| rs35363319  | 18 | 13607469 GT           | 7  | 0 G       | 0.0008679  |
| rs12605886  | 18 | 13611533 T            | 18 | 9 G       | 0.0009279  |
| rs148457493 | 18 | 15207993 C            | 3  | 27 CCCTTG | 0.0002808  |
| rs35585139  | 18 | 22958165 A            | 10 | 1 G       | 0.0002681  |
| rs929704    | 18 | 24028353 A            | 14 | 57 T      | 0.00001769 |
| rs11433917  | 18 | 24029563 G            | 11 | 49 GC     | 0.00006054 |
| rs202138803 | 18 | 27865841 AT           | 11 | 44 A      | 0.0007768  |
| rs111414298 | 18 | 34880257 G            | 7  | 0 A       | 0.0009566  |
| rs1787086   | 18 | 35309697 G            | 22 | 9 T       | 0.00004081 |
| 18:35309698 | 18 | 35309698 G            | 17 | 7 A       | 0.0004382  |
| 18:35309700 | 18 | 35309700 CGATCTGTCTAT | 23 | 12 C      | 0.0002434  |
| rs10853454  | 18 | 36005986 G            | 11 | 43 A      | 0.0007141  |
| rs7241992   | 18 | 36020096 T            | 14 | 52 C      | 0.0001845  |
| rs472591    | 18 | 40483622 A            | 16 | 7 G       | 0.0009539  |
| rs367904418 | 18 | 48853566 A            | 18 | 7 T       | 0.0001975  |
| rs5824918   | 18 | 49707139 A            | 20 | 6 AT      | 0.00001339 |
| rs17815367  | 18 | 49710900 G            | 20 | 6 A       | 0.00001074 |

|             |    |                |    |                        |            |
|-------------|----|----------------|----|------------------------|------------|
| rs4940169   | 18 | 49713609 T     | 20 | 6 C                    | 0.00001074 |
| rs4617958   | 18 | 49716105 G     | 20 | 6 A                    | 0.00001074 |
| rs117258597 | 18 | 49718931 T     | 14 | 5 C                    | 0.0008508  |
| rs1822853   | 18 | 49722688 G     | 14 | 5 C                    | 0.0008508  |
| rs7232159   | 18 | 49727080 G     | 14 | 5 A                    | 0.0008508  |
| rs56247919  | 18 | 49727301 T     | 14 | 5 C                    | 0.0008508  |
| rs9967108   | 18 | 49731470 A     | 14 | 5 G                    | 0.0008508  |
| 18:53253409 | 18 | 53253409 A     | 13 | 47 AG                  | 0.0009845  |
| 18:53253411 | 18 | 53253411 C     | 13 | 47 CAGCAGCAGCAGCAGCAGC | 0.0009845  |
| rs10163859  | 18 | 56274075 T     | 14 | 51 C                   | 0.000328   |
| rs7245005   | 18 | 56277218 A     | 14 | 51 C                   | 0.000328   |
| rs141675242 | 18 | 56915946 AGAAG | 38 | 28 A                   | 0.00006287 |
| 18:61815642 | 18 | 61815642 C     | 3  | 25 T                   | 0.0009258  |
| 18:72564123 | 18 | 72564123 G     | 2  | 26 A                   | 0.0001452  |
| rs60749094  | 18 | 73824642 G     | 37 | 32 C                   | 0.0003248  |
| rs76470163  | 18 | 73824644 G     | 37 | 33 C                   | 0.0006234  |
| rs73483896  | 18 | 75682645 T     | 14 | 4 C                    | 0.0003939  |
| rs113847412 | 18 | 75684998 C     | 14 | 4 G                    | 0.0003939  |
| rs73485705  | 18 | 75688882 T     | 14 | 4 C                    | 0.0003939  |
| rs4624302   | 18 | 75692920 C     | 14 | 4 T                    | 0.0003939  |
| rs113437666 | 18 | 75694247 G     | 14 | 4 T                    | 0.0003939  |
| rs201116607 | 19 | 7312727 T      | 2  | 30 C                   | 0.00001022 |
| 19:7316684  | 19 | 7316684 GTA    | 2  | 29 G                   | 0.00001936 |
| rs3093029   | 19 | 10399551 G     | 12 | 2 C                    | 0.0001711  |
| rs73510898  | 19 | 10416444 A     | 13 | 4 G                    | 0.000883   |
| rs75231016  | 19 | 10420982 C     | 13 | 4 G                    | 0.000883   |
| rs12720356  | 19 | 10469975 C     | 14 | 4 A                    | 0.0003939  |
| rs2304257   | 19 | 10491005 G     | 13 | 4 C                    | 0.000883   |
| rs34285220  | 19 | 11184260 T     | 7  | 0 C                    | 0.0008679  |
| rs7249753   | 19 | 11192226 C     | 7  | 0 T                    | 0.0008679  |
| rs12981050  | 19 | 11200412 T     | 7  | 0 C                    | 0.0008679  |
| rs2569543   | 19 | 11236121 C     | 9  | 0 G                    | 0.00008233 |
| rs2569538   | 19 | 11238548 A     | 9  | 0 G                    | 0.0001034  |
| rs4804567   | 19 | 11245472 T     | 8  | 0 C                    | 0.0003016  |
| rs7256793   | 19 | 11247081 T     | 8  | 0 C                    | 0.0003016  |
| rs1054486   | 19 | 12774208 C     | 30 | 21 G                   | 0.0001793  |
| rs1859007   | 19 | 19162186 C     | 0  | 16 G                   | 0.0005399  |
| 19:36438503 | 19 | 36438503 C     | 10 | 42 T                   | 0.0003844  |
| 19:48492369 | 19 | 48492369 T     | 2  | 22 TA                  | 0.0009583  |
| rs146010481 | 19 | 49222905 GC    | 0  | 16 G                   | 0.0005294  |
| rs62132778  | 19 | 49234624 C     | 2  | 23 G                   | 0.0005167  |

|             |    |              |    |       |            |
|-------------|----|--------------|----|-------|------------|
| rs60068692  | 19 | 49236465 A   | 0  | 15 G  | 0.0005628  |
| rs35650232  | 19 | 49259973 G   | 6  | 32 T  | 0.0008713  |
| rs34860785  | 19 | 49554411 G   | 26 | 16 GC | 0.0002858  |
| rs382838    | 19 | 52997170 A   | 7  | 0 G   | 0.0008679  |
| rs36067315  | 19 | 54070074 A   | 30 | 23 AT | 0.0007082  |
| rs10417487  | 19 | 54076784 C   | 28 | 19 T  | 0.0002695  |
| rs11879243  | 19 | 54093450 A   | 7  | 36 G  | 0.0006279  |
| rs201362768 | 19 | 56038849 TCG | 3  | 25 T  | 0.0009258  |
| rs4384691   | 19 | 58567696 G   | 12 | 45 A  | 0.0009266  |
| rs62125248  | 19 | 58568181 C   | 12 | 45 T  | 0.0009266  |
| rs974183    | 19 | 58569118 C   | 15 | 52 G  | 0.0006042  |
| rs6054736   | 20 | 762555 T     | 27 | 17 C  | 0.000186   |
| rs6054737   | 20 | 762696 T     | 27 | 17 G  | 0.000186   |
| rs6054739   | 20 | 762778 C     | 27 | 17 T  | 0.000186   |
| rs6054740   | 20 | 762977 G     | 27 | 17 T  | 0.000186   |
| rs6085872   | 20 | 763195 A     | 27 | 17 G  | 0.000186   |
| rs6085874   | 20 | 763391 T     | 21 | 12 C  | 0.0009318  |
| rs6085876   | 20 | 763541 G     | 27 | 17 A  | 0.000186   |
| rs6085877   | 20 | 763651 G     | 27 | 17 A  | 0.000186   |
| rs6085878   | 20 | 763831 G     | 28 | 17 A  | 0.0000884  |
| rs6085880   | 20 | 763838 A     | 21 | 12 G  | 0.0009318  |
| rs6085881   | 20 | 763968 C     | 27 | 17 A  | 0.000186   |
| rs6085882   | 20 | 764067 T     | 27 | 17 C  | 0.000186   |
| rs6085884   | 20 | 764163 T     | 27 | 17 C  | 0.000186   |
| rs6085887   | 20 | 764382 A     | 27 | 17 G  | 0.000186   |
| rs6085889   | 20 | 764477 G     | 27 | 17 A  | 0.000186   |
| rs6085890   | 20 | 764580 G     | 27 | 17 A  | 0.000186   |
| rs6085892   | 20 | 764832 A     | 27 | 17 G  | 0.000186   |
| rs6038717   | 20 | 764887 G     | 27 | 17 A  | 0.000186   |
| rs6054751   | 20 | 764888 C     | 27 | 17 A  | 0.000186   |
| rs6038718   | 20 | 764980 T     | 27 | 17 C  | 0.000186   |
| rs6117641   | 20 | 764990 A     | 27 | 17 G  | 0.000186   |
| rs4815973   | 20 | 765338 A     | 27 | 17 T  | 0.000186   |
| rs4815974   | 20 | 765464 A     | 27 | 17 G  | 0.000186   |
| rs4815975   | 20 | 765937 C     | 27 | 17 A  | 0.000186   |
| rs6104589   | 20 | 1089123 T    | 14 | 51 C  | 0.000328   |
| rs56113269  | 20 | 1655186 T    | 13 | 2 C   | 0.00006438 |
| rs60733085  | 20 | 1655481 T    | 13 | 2 C   | 0.00006438 |
| rs4473456   | 20 | 1659992 A    | 13 | 2 C   | 0.00006438 |
| rs6043722   | 20 | 1661245 A    | 13 | 2 G   | 0.00006438 |
| rs60824122  | 20 | 1663080 A    | 13 | 2 G   | 0.00006438 |

|             |    |             |    |      |            |
|-------------|----|-------------|----|------|------------|
| rs12626154  | 20 | 1664079 T   | 13 | 2 C  | 0.00006438 |
| rs72484092  | 20 | 1665756 G   | 13 | 2 T  | 0.00006438 |
| rs72484093  | 20 | 1666842 G   | 13 | 2 T  | 0.00006438 |
| rs2273329   | 20 | 1678188 T   | 13 | 2 C  | 0.00006438 |
| rs75624807  | 20 | 3427167 A   | 7  | 0 C  | 0.0008679  |
| rs75132954  | 20 | 3446195 G   | 8  | 0 T  | 0.0003016  |
| rs16988566  | 20 | 3447224 G   | 8  | 0 A  | 0.0003016  |
| rs77240657  | 20 | 3447716 G   | 8  | 0 A  | 0.0003016  |
| rs74638763  | 20 | 3449559 A   | 8  | 0 G  | 0.0003016  |
| rs6107293   | 20 | 3452512 A   | 8  | 0 G  | 0.0003016  |
| rs79115083  | 20 | 3455395 G   | 8  | 0 T  | 0.0003016  |
| rs111488652 | 20 | 3455575 G   | 7  | 0 A  | 0.0008679  |
| rs73893004  | 20 | 3455944 C   | 8  | 0 G  | 0.0003016  |
| rs238724    | 20 | 3469332 G   | 8  | 0 C  | 0.0003016  |
| 20:3473524  | 20 | 3473524 G   | 8  | 0 A  | 0.000247   |
| rs145053037 | 20 | 3479380 G   | 8  | 0 A  | 0.0003016  |
| rs116211755 | 20 | 3481508 T   | 7  | 0 A  | 0.0008679  |
| rs75203092  | 20 | 3485028 C   | 8  | 0 A  | 0.0003016  |
| rs57391116  | 20 | 3495212 A   | 8  | 0 G  | 0.0003016  |
| rs112749688 | 20 | 3511035 T   | 7  | 0 C  | 0.0008679  |
| rs76354602  | 20 | 3512458 G   | 8  | 0 A  | 0.0003016  |
| rs79234455  | 20 | 3519375 T   | 8  | 0 A  | 0.0003016  |
| rs11697740  | 20 | 9094630 T   | 18 | 8 G  | 0.0005897  |
| rs8122136   | 20 | 9096762 A   | 18 | 8 G  | 0.0005897  |
| rs8114968   | 20 | 9099219 T   | 18 | 8 C  | 0.0005897  |
| rs9679853   | 20 | 9101418 C   | 18 | 8 T  | 0.0005897  |
| rs35494972  | 20 | 9102024 T   | 18 | 8 C  | 0.0005897  |
| rs11697355  | 20 | 9102114 G   | 18 | 8 A  | 0.0005897  |
| rs7271703   | 20 | 9102845 A   | 18 | 8 G  | 0.0005897  |
| rs7266736   | 20 | 9103343 G   | 18 | 8 A  | 0.0005897  |
| rs6516437   | 20 | 9108165 A   | 18 | 8 G  | 0.0005897  |
| rs12624848  | 20 | 9109267 G   | 18 | 8 A  | 0.0005897  |
| rs7264121   | 20 | 9114588 T   | 18 | 8 A  | 0.0005897  |
| rs13044386  | 20 | 9116155 A   | 18 | 8 G  | 0.0005897  |
| rs986995    | 20 | 9120479 G   | 18 | 8 C  | 0.0005897  |
| rs13036264  | 20 | 9132796 C   | 17 | 7 G  | 0.0004382  |
| rs13041550  | 20 | 9133660 A   | 16 | 7 G  | 0.0009539  |
| rs113907634 | 20 | 11224146 AT | 28 | 19 A | 0.00047    |
| rs6134480   | 20 | 12226630 T  | 37 | 34 C | 0.0006983  |
| rs6134481   | 20 | 12226754 A  | 37 | 34 G | 0.0006983  |
| rs8117853   | 20 | 12226945 C  | 37 | 34 T | 0.0006983  |

|             |    |             |    |        |            |
|-------------|----|-------------|----|--------|------------|
| rs6134807   | 20 | 13182235 G  | 0  | 15 A   | 0.0005628  |
| rs6131449   | 20 | 13185372 A  | 0  | 15 C   | 0.0005628  |
| rs144086464 | 20 | 13186217 C  | 0  | 15 CT  | 0.0005628  |
| rs6137853   | 20 | 23147846 C  | 9  | 1 T    | 0.0007194  |
| rs34854625  | 20 | 32501744 CT | 13 | 4 C    | 0.0006614  |
| rs6579129   | 20 | 32533524 T  | 7  | 35 A   | 0.0007198  |
| rs73904764  | 20 | 32648075 C  | 2  | 24 G   | 0.0002818  |
| rs79078695  | 20 | 32654817 G  | 0  | 21 T   | 0.00003544 |
| rs79027916  | 20 | 32654818 A  | 0  | 21 C   | 0.00003544 |
| rs77042903  | 20 | 32668624 T  | 2  | 24 C   | 0.0002818  |
| 20:33909063 | 20 | 33909063 G  | 4  | 29 GT  | 0.0004463  |
| rs34874881  | 20 | 35284381 G  | 9  | 1 A    | 0.0007194  |
| rs3843762   | 20 | 42839990 C  | 7  | 0 T    | 0.0008679  |
| rs16988852  | 20 | 42841629 A  | 7  | 0 G    | 0.0008679  |
| rs73106287  | 20 | 42842363 A  | 7  | 0 T    | 0.0008679  |
| rs73106290  | 20 | 42843271 A  | 7  | 0 G    | 0.0008679  |
| rs73106293  | 20 | 42843929 G  | 7  | 0 A    | 0.0008679  |
| rs78619615  | 20 | 42844249 C  | 7  | 0 CAAT | 0.0008679  |
| rs12624924  | 20 | 42845269 C  | 7  | 0 T    | 0.0008679  |
| rs75704496  | 20 | 42845345 TC | 7  | 0 T    | 0.0008679  |
| rs45472797  | 20 | 42846065 T  | 7  | 0 C    | 0.0008679  |
| rs55691720  | 20 | 42847766 G  | 7  | 0 A    | 0.0008679  |
| rs41280254  | 20 | 42852509 T  | 7  | 0 C    | 0.0008679  |
| rs523004    | 20 | 48205025 T  | 26 | 17 C   | 0.0006727  |
| rs473069    | 20 | 48205055 A  | 27 | 18 G   | 0.0004001  |
| rs6063430   | 20 | 48404077 C  | 10 | 42 T   | 0.0006808  |
| rs117259369 | 20 | 51890546 T  | 9  | 1 G    | 0.0007194  |
| rs204765    | 20 | 52250478 T  | 4  | 28 C   | 0.0008078  |
| rs204766    | 20 | 52250781 G  | 4  | 28 A   | 0.0008078  |
| rs204767    | 20 | 52250876 C  | 4  | 28 T   | 0.0008078  |
| rs204768    | 20 | 52251613 G  | 4  | 28 C   | 0.0008078  |
| rs204769    | 20 | 52253579 T  | 4  | 28 C   | 0.0008078  |
| rs204771    | 20 | 52254420 C  | 12 | 49 T   | 0.0001424  |
| rs71323974  | 20 | 52389640 C  | 13 | 4 A    | 0.000981   |
| rs74520236  | 20 | 55090657 G  | 10 | 2 C    | 0.0008882  |
| 20:55090659 | 20 | 55090659 G  | 9  | 1 C    | 0.0005799  |
| rs6025163   | 20 | 55364708 T  | 7  | 35 C   | 0.0007198  |
| rs2426686   | 20 | 55364766 C  | 8  | 41 T   | 0.0001361  |
| rs167847    | 20 | 56521853 A  | 19 | 9 T    | 0.0004395  |
| rs2426761   | 20 | 56526972 G  | 25 | 14 A   | 0.0001947  |
| rs370087    | 20 | 56527490 T  | 25 | 14 C   | 0.0001947  |



|             |    |             |    |       |           |
|-------------|----|-------------|----|-------|-----------|
| rs62206222  | 20 | 56528595 T  | 19 | 9 C   | 0.0004395 |
| rs7273047   | 20 | 57987661 G  | 17 | 7 C   | 0.0004382 |
| rs1041272   | 20 | 57987864 A  | 17 | 7 G   | 0.0004382 |
| rs369319469 | 21 | 9420676 A   | 7  | 0 G   | 0.0008679 |
| rs375128030 | 21 | 9584280 C   | 8  | 0 T   | 0.0003016 |
| 21:9994132  | 21 | 9994132 G   | 15 | 4 T   | 0.000175  |
| rs11912006  | 21 | 16506531 T  | 7  | 0 C   | 0.0008679 |
| rs71330164  | 21 | 22886804 C  | 9  | 41 A  | 0.0009153 |
| rs35603376  | 21 | 24937476 C  | 17 | 57 CT | 0.0005003 |
| rs7280791   | 21 | 25853593 C  | 38 | 35 T  | 0.0006427 |
| rs9975542   | 21 | 29285000 G  | 17 | 7 A   | 0.0004382 |
| rs2091928   | 21 | 30617086 G  | 2  | 23 A  | 0.0005167 |
| rs2244978   | 21 | 30618226 C  | 2  | 23 A  | 0.0005167 |
| rs1236461   | 21 | 30619989 A  | 2  | 23 G  | 0.0005167 |
| rs1236462   | 21 | 30622725 A  | 0  | 15 G  | 0.0005628 |
| rs4817280   | 21 | 30646046 C  | 2  | 23 T  | 0.0005167 |
| rs78907469  | 21 | 30651727 A  | 0  | 15 C  | 0.0005628 |
| rs61547678  | 21 | 30658435 T  | 2  | 23 C  | 0.0005167 |
| rs12482988  | 21 | 30660917 A  | 0  | 15 G  | 0.0005628 |
| rs4621239   | 21 | 30669459 A  | 2  | 23 C  | 0.0005167 |
| rs2300301   | 21 | 30676316 G  | 2  | 23 A  | 0.0005167 |
| rs2248043   | 21 | 30682347 T  | 2  | 22 C  | 0.0009583 |
| rs2832281   | 21 | 30685563 T  | 2  | 22 C  | 0.0009583 |
| rs77638319  | 21 | 30702229 TA | 2  | 22 T  | 0.0009583 |
| rs5843379   | 21 | 30717616 A  | 2  | 22 AT | 0.0009583 |
| rs2832286   | 21 | 30720971 T  | 2  | 22 C  | 0.0009583 |
| rs2832287   | 21 | 30721932 C  | 2  | 22 T  | 0.0009583 |
| rs2832288   | 21 | 30722560 C  | 2  | 22 T  | 0.0009583 |
| rs17744645  | 21 | 30726922 A  | 1  | 21 G  | 0.0002339 |
| rs4817283   | 21 | 30727894 C  | 2  | 22 T  | 0.0009583 |
| rs11910694  | 21 | 30728257 C  | 2  | 22 A  | 0.0009583 |
| rs74313696  | 21 | 30731498 G  | 2  | 22 A  | 0.0009583 |
| rs147525188 | 21 | 30738295 GT | 2  | 22 G  | 0.0009583 |
| rs9647054   | 21 | 30748728 A  | 5  | 31 T  | 0.0006549 |
| rs9647133   | 21 | 30748729 A  | 5  | 31 C  | 0.0006549 |
| rs1977905   | 21 | 32668006 T  | 14 | 4 C   | 0.0003939 |
| rs116478170 | 21 | 34544260 A  | 9  | 1 G   | 0.0007194 |
| rs73205065  | 21 | 34545442 A  | 9  | 1 T   | 0.0007194 |
| rs715116    | 21 | 34547667 A  | 9  | 1 G   | 0.0007194 |
| rs73205071  | 21 | 34552644 T  | 9  | 1 C   | 0.0007194 |
| rs73205072  | 21 | 34552723 C  | 9  | 1 T   | 0.0007194 |

|             |    |                        |    |      |           |
|-------------|----|------------------------|----|------|-----------|
| rs73205073  | 21 | 34553102 C             | 9  | 1 T  | 0.0007194 |
| 21:38052040 | 21 | 38052040 A             | 0  | 17 G | 0.0002606 |
| rs9975976   | 21 | 41422527 G             | 29 | 22 A | 0.0007063 |
| rs9305690   | 21 | 41430388 A             | 29 | 22 G | 0.0007063 |
| rs13048349  | 21 | 43194459 T             | 13 | 47 G | 0.0009845 |
| rs13051036  | 21 | 43194464 G             | 13 | 47 A | 0.0009845 |
| rs13050469  | 21 | 43194647 C             | 13 | 48 T | 0.0005647 |
| rs13051449  | 21 | 43194680 A             | 13 | 48 G | 0.0005647 |
| rs13048431  | 21 | 43194705 A             | 13 | 48 C | 0.0005647 |
| rs13051575  | 21 | 43194795 A             | 13 | 48 G | 0.0005647 |
| rs13050610  | 21 | 43194798 C             | 13 | 48 T | 0.0005647 |
| rs13047126  | 21 | 43194856 G             | 13 | 48 A | 0.0005647 |
| rs13047384  | 21 | 43195062 G             | 13 | 48 A | 0.0005647 |
| rs13048903  | 21 | 43195074 T             | 13 | 48 C | 0.0005647 |
| rs13047351  | 21 | 43195679 C             | 15 | 51 T | 0.0006974 |
| rs12627623  | 21 | 43197859 T             | 12 | 46 A | 0.0005428 |
| rs60027869  | 21 | 43364813 T             | 18 | 8 C  | 0.0005897 |
| rs4920032   | 21 | 43368105 A             | 18 | 8 C  | 0.0005897 |
| rs9978540   | 21 | 43369599 T             | 20 | 9 C  | 0.0002046 |
| rs183516    | 21 | 46278923 T             | 11 | 47 C | 0.0001343 |
| rs188419227 | 21 | 46763272 T             | 8  | 0 C  | 0.0003016 |
| rs147041751 | 21 | 46796202 A             | 8  | 0 G  | 0.0003016 |
| rs4818845   | 21 | 47966016 G             | 15 | 5 C  | 0.0003715 |
| rs5749041   | 22 | 17825248 T             | 37 | 33 C | 0.0006234 |
| 22:21709667 | 22 | 21709667 T             | 6  | 32 C | 0.0008219 |
| rs140433    | 22 | 22977269 A             | 13 | 3 T  | 0.0001799 |
| 22:23103428 | 22 | 23103428 A             | 20 | 11 G | 0.0008202 |
| rs6003306   | 22 | 23136811 G             | 7  | 0 A  | 0.0008679 |
| rs6003308   | 22 | 23139043 C             | 7  | 0 T  | 0.0008679 |
| rs12157440  | 22 | 23139081 T             | 7  | 0 C  | 0.0008679 |
| rs112199621 | 22 | 23140068 T             | 7  | 0 TA | 0.0008679 |
| rs5996387   | 22 | 23143636 G             | 7  | 0 A  | 0.0008679 |
| rs9612496   | 22 | 24221405 C             | 13 | 47 G | 0.0009845 |
| rs9612497   | 22 | 24221445 T             | 13 | 47 C | 0.0009845 |
| rs5763646   | 22 | 30359410 C             | 8  | 42 T | 0.0002398 |
| 22:31019704 | 22 | 31019704 CACACATATATAT | 9  | 0 C  | 0.0001173 |
| rs933224    | 22 | 36766003 T             | 30 | 23 C | 0.0007082 |
| rs4821767   | 22 | 38614129 C             | 13 | 47 A | 0.0009845 |
| rs12172253  | 22 | 38781997 A             | 18 | 9 G  | 0.0008077 |
| rs139764778 | 22 | 41665995 A             | 7  | 0 G  | 0.0008679 |
| rs142865703 | 22 | 44594739 TATCC         | 2  | 23 T | 0.0005167 |

|             |    |                |    |          |            |
|-------------|----|----------------|----|----------|------------|
| rs13058073  | 22 | 45225247 G     | 14 | 5 T      | 0.0008508  |
| rs4823388   | 22 | 45226985 A     | 19 | 9 G      | 0.0004395  |
| rs4823389   | 22 | 45226990 G     | 19 | 9 A      | 0.0004395  |
| rs12483795  | 22 | 45227123 C     | 19 | 9 T      | 0.0004395  |
| rs4823390   | 22 | 45227167 C     | 19 | 9 T      | 0.0004395  |
| rs4823391   | 22 | 45227172 T     | 19 | 9 C      | 0.0004395  |
| rs4823392   | 22 | 45227273 T     | 19 | 9 C      | 0.0004395  |
| rs5766073   | 22 | 45227318 G     | 19 | 9 A      | 0.0004395  |
| rs36042057  | 22 | 45227402 AC    | 19 | 9 A      | 0.0004395  |
| rs35282580  | 22 | 45227579 CA    | 14 | 5 C      | 0.0008508  |
| rs5766074   | 22 | 45227827 G     | 14 | 5 C      | 0.0008508  |
| rs5766075   | 22 | 45228629 C     | 14 | 5 T      | 0.0008508  |
| rs150439071 | 22 | 45229224 GTGGT | 13 | 2 G      | 0.00006438 |
| rs5766076   | 22 | 45229798 G     | 14 | 5 A      | 0.0008508  |
| rs5766077   | 22 | 45230436 T     | 14 | 5 C      | 0.0008508  |
| rs9917547   | 22 | 45231099 C     | 14 | 5 T      | 0.0008508  |
| rs5845675   | 22 | 45231795 T     | 14 | 5 TG     | 0.0008508  |
| rs5765043   | 22 | 45231883 C     | 14 | 5 T      | 0.0008508  |
| rs2269536   | 22 | 45232965 G     | 14 | 5 A      | 0.0008508  |
| X:562214    | 23 | 562214 A       | 12 | 45 G     | 0.0009266  |
| X:563872    | 23 | 563872 A       | 10 | 42 C     | 0.0006808  |
| X:743185    | 23 | 743185 C       | 28 | 19 T     | 0.00047    |
| X:944463    | 23 | 944463 T       | 8  | 37 C     | 0.0008686  |
| X:951162    | 23 | 951162 T       | 36 | 33 G     | 0.0009752  |
| X:952260    | 23 | 952260 G       | 38 | 34 C     | 0.000347   |
| X:952262    | 23 | 952262 G       | 38 | 34 C     | 0.000347   |
| X:952300    | 23 | 952300 C       | 37 | 32 G     | 0.0003684  |
| X:952447    | 23 | 952447 G       | 38 | 35 GTCTC | 0.0006427  |
| X:952501    | 23 | 952501 C       | 38 | 35 G     | 0.0006427  |
| rs5939341   | 23 | 2734930 G      | 6  | 35 C     | 0.0002764  |
| rs113131499 | 23 | 2734948 AC     | 6  | 33 A     | 0.000495   |
| rs62582293  | 23 | 2747703 T      | 1  | 18 C     | 0.0008528  |
| rs57068689  | 23 | 2748051 T      | 3  | 26 C     | 0.0005131  |
| rs12398173  | 23 | 3454292 G      | 22 | 11 C     | 0.0001874  |
| rs5915463   | 23 | 3650763 T      | 20 | 10 C     | 0.0005977  |
| rs67132522  | 23 | 3665013 C      | 17 | 7 T      | 0.0005099  |
| rs5916697   | 23 | 4628916 T      | 17 | 55 C     | 0.000662   |
| rs11798666  | 23 | 4905356 C      | 9  | 43 T     | 0.0001644  |
| rs58367116  | 23 | 9904364 C      | 18 | 9 T      | 0.0009279  |
| rs5934765   | 23 | 10107241 G     | 7  | 40 C     | 0.00008907 |
| rs5934766   | 23 | 10108960 A     | 11 | 43 G     | 0.0008678  |

|             |    |              |    |                     |            |
|-------------|----|--------------|----|---------------------|------------|
| rs5934767   | 23 | 10109014 G   | 11 | 43 A                | 0.0008678  |
| rs5933977   | 23 | 12280747 C   | 30 | 23 T                | 0.0007082  |
| rs62578874  | 23 | 15495759 C   | 5  | 31 T                | 0.0006549  |
| rs62578875  | 23 | 15495810 A   | 5  | 31 G                | 0.0006549  |
| rs6632666   | 23 | 15496733 C   | 5  | 31 T                | 0.0006549  |
| rs6629103   | 23 | 15499047 C   | 5  | 31 A                | 0.0006549  |
| rs5934245   | 23 | 15499746 G   | 5  | 31 A                | 0.0006549  |
| rs5934246   | 23 | 15505264 C   | 5  | 31 T                | 0.0006549  |
| rs6632668   | 23 | 15506733 G   | 5  | 31 A                | 0.0006549  |
| rs5978772   | 23 | 16467111 A   | 33 | 25 G                | 0.0002294  |
| rs4825330   | 23 | 17552650 A   | 3  | 25 G                | 0.0009258  |
| rs5904523   | 23 | 22285006 T   | 26 | 18 A                | 0.0007809  |
| rs62584154  | 23 | 23111867 A   | 2  | 23 G                | 0.0005167  |
| rs73198955  | 23 | 23133898 G   | 9  | 1 A                 | 0.0007194  |
| rs2695491   | 23 | 23134026 T   | 5  | 33 A                | 0.0002023  |
| rs2465828   | 23 | 23140838 G   | 9  | 42 A                | 0.0003081  |
| rs5018824   | 23 | 23154667 T   | 12 | 45 G                | 0.0009266  |
| rs5925724   | 23 | 23154938 C   | 5  | 34 G                | 0.0001138  |
| rs5925725   | 23 | 23155133 C   | 5  | 32 T                | 0.0003626  |
| rs79897219  | 23 | 23156347 C   | 7  | 0 T                 | 0.0008679  |
| rs5926337   | 23 | 23465760 C   | 13 | 2 T                 | 0.00006438 |
| rs6629690   | 23 | 23598811 G   | 36 | 29 A                | 0.0001509  |
| rs4828873   | 23 | 23616474 G   | 33 | 28 A                | 0.0009909  |
| rs2885473   | 23 | 23616686 C   | 33 | 28 T                | 0.0009909  |
| rs2885474   | 23 | 23616752 C   | 33 | 28 T                | 0.0009909  |
| rs5970757   | 23 | 23620422 T   | 32 | 25 C                | 0.0004454  |
| rs59623092  | 23 | 23622264 A   | 32 | 25 AAGAATGCCACTGCCT | 0.0004454  |
| rs189169676 | 23 | 24248972 T   | 8  | 0 G                 | 0.0003016  |
| rs113912339 | 23 | 25084085 C   | 7  | 0 T                 | 0.0008679  |
| rs112566028 | 23 | 25086290 C   | 7  | 0 G                 | 0.0008679  |
| rs112466980 | 23 | 25088391 C   | 7  | 0 G                 | 0.0008679  |
| rs4898305   | 23 | 25088920 G   | 7  | 0 A                 | 0.0008679  |
| X:25097947  | 23 | 25097947 CAT | 7  | 0 C                 | 0.0009566  |
| X:25097957  | 23 | 25097957 T   | 7  | 0 C                 | 0.0009566  |
| rs113491897 | 23 | 25098985 C   | 7  | 0 T                 | 0.0008679  |
| rs200103439 | 23 | 25104644 TC  | 7  | 0 T                 | 0.0008679  |
| rs112483250 | 23 | 25112646 C   | 7  | 0 T                 | 0.0008679  |
| rs111350748 | 23 | 25112690 T   | 7  | 0 C                 | 0.0008679  |
| rs113853004 | 23 | 25116140 T   | 7  | 0 C                 | 0.0008679  |
| rs368084863 | 23 | 25120155 T   | 7  | 0 C                 | 0.0008679  |
| rs199741820 | 23 | 25128561 TAA | 7  | 0 T                 | 0.0008679  |

|             |    |              |    |      |            |
|-------------|----|--------------|----|------|------------|
| rs113637250 | 23 | 25132172 G   | 7  | 0 A  | 0.0008679  |
| rs192430333 | 23 | 26150490 G   | 12 | 2 C  | 0.0002346  |
| rs143450119 | 23 | 26153200 T   | 12 | 2 C  | 0.0001711  |
| rs141122379 | 23 | 26222568 A   | 12 | 2 G  | 0.0001711  |
| rs146979379 | 23 | 26265498 C   | 12 | 2 G  | 0.0001711  |
| rs145026071 | 23 | 26293486 G   | 12 | 2 A  | 0.0001711  |
| rs140699821 | 23 | 26341000 T   | 12 | 2 G  | 0.0001711  |
| rs72340275  | 23 | 27386423 TTA | 31 | 25 T | 0.0008555  |
| rs5926577   | 23 | 28323036 T   | 19 | 7 A  | 0.00008788 |
| rs12391023  | 23 | 28323501 A   | 19 | 7 C  | 0.00008788 |
| rs12856271  | 23 | 28323519 G   | 19 | 7 T  | 0.00008788 |
| rs35197417  | 23 | 28326346 T   | 19 | 7 C  | 0.00008788 |
| rs12387440  | 23 | 28770293 G   | 19 | 9 A  | 0.0004395  |
| rs10521946  | 23 | 28770685 A   | 19 | 9 G  | 0.0004395  |
| rs12846361  | 23 | 28776628 G   | 19 | 9 A  | 0.0004395  |
| rs1842879   | 23 | 28851539 A   | 14 | 5 C  | 0.0008508  |
| rs5927029   | 23 | 31689066 C   | 11 | 2 T  | 0.0004434  |
| rs5927038   | 23 | 31768311 A   | 9  | 1 G  | 0.0007194  |
| rs936400    | 23 | 31849330 A   | 6  | 36 G | 0.0001537  |
| rs2405153   | 23 | 31850711 C   | 39 | 37 G | 0.000662   |
| rs1965262   | 23 | 31852562 T   | 6  | 32 G | 0.00098    |
| rs2199049   | 23 | 31862612 T   | 6  | 33 C | 0.0009629  |
| rs4829235   | 23 | 31900869 T   | 3  | 27 C | 0.0002808  |
| X:31915397  | 23 | 31915397 C   | 3  | 24 G | 0.0009363  |
| rs331318    | 23 | 32324466 C   | 40 | 34 T | 0.00008167 |
| rs12010323  | 23 | 32327384 A   | 0  | 15 T | 0.0005628  |
| rs11095228  | 23 | 32327486 G   | 0  | 15 T | 0.0005628  |
| rs28588634  | 23 | 32327527 T   | 0  | 15 C | 0.0005628  |
| rs114124505 | 23 | 32329083 T   | 0  | 15 C | 0.0005628  |
| rs145001082 | 23 | 32329186 G   | 0  | 15 A | 0.0005628  |
| rs41369746  | 23 | 32329269 G   | 0  | 15 A | 0.0005628  |
| rs115862380 | 23 | 32330062 A   | 0  | 15 G | 0.0005628  |
| rs5927113   | 23 | 32952019 G   | 0  | 18 A | 0.0001312  |
| rs139327021 | 23 | 33349947 T   | 13 | 4 C  | 0.000883   |
| rs149576274 | 23 | 33350633 A   | 13 | 4 G  | 0.000883   |
| rs202231501 | 23 | 33351443 A   | 13 | 4 AG | 0.000883   |
| rs139569192 | 23 | 33353400 A   | 13 | 4 C  | 0.000883   |
| rs149704165 | 23 | 33353435 A   | 13 | 4 G  | 0.000883   |
| rs73623950  | 23 | 33353963 A   | 13 | 4 C  | 0.000883   |
| rs66718538  | 23 | 33357839 G   | 13 | 4 T  | 0.000883   |
| rs145704272 | 23 | 33361712 T   | 13 | 4 C  | 0.000883   |

|             |    |                 |    |                       |            |
|-------------|----|-----------------|----|-----------------------|------------|
| rs138261017 | 23 | 33363323 G      | 13 | 4 C                   | 0.000883   |
| rs149302050 | 23 | 33364294 T      | 13 | 4 C                   | 0.000981   |
| rs73623953  | 23 | 33365232 C      | 13 | 4 G                   | 0.000883   |
| rs139948839 | 23 | 33365720 C      | 13 | 4 T                   | 0.000883   |
| rs73623955  | 23 | 33367217 T      | 13 | 4 A                   | 0.000883   |
| rs148926468 | 23 | 33369764 T      | 13 | 4 C                   | 0.000883   |
| rs143620890 | 23 | 33369836 T      | 13 | 4 C                   | 0.000883   |
| rs146108307 | 23 | 33373323 A      | 13 | 4 G                   | 0.000883   |
| rs5928245   | 23 | 33374322 T      | 31 | 21 C                  | 0.00008418 |
| rs143514056 | 23 | 33375050 A      | 13 | 4 G                   | 0.000883   |
| rs148524859 | 23 | 33378151 G      | 13 | 4 A                   | 0.000883   |
| rs142803377 | 23 | 33378182 A      | 13 | 4 G                   | 0.000883   |
| rs147654804 | 23 | 33378479 T      | 13 | 4 C                   | 0.000883   |
| rs150341416 | 23 | 33379556 A      | 13 | 4 C                   | 0.000883   |
| rs7055924   | 23 | 33388392 G      | 13 | 4 A                   | 0.000883   |
| rs7061656   | 23 | 33389014 C      | 13 | 4 T                   | 0.000883   |
| rs113761632 | 23 | 33392266 A      | 16 | 4 G                   | 0.00007821 |
| rs9887051   | 23 | 33393169 C      | 18 | 4 T                   | 0.00000678 |
| rs150218268 | 23 | 33394045 T      | 18 | 4 C                   | 0.00000678 |
| rs62594431  | 23 | 33394466 A      | 18 | 4 T                   | 0.00000678 |
| rs370407198 | 23 | 37897073 A      | 20 | 10 AG                 | 0.0005561  |
| rs374693453 | 23 | 37897075 A      | 20 | 10 ATAG               | 0.0005561  |
| rs4827139   | 23 | 39185636 T      | 7  | 36 G                  | 0.0006639  |
| rs953524    | 23 | 39227207 A      | 8  | 37 G                  | 0.0008686  |
| rs12387471  | 23 | 39228662 T      | 8  | 37 C                  | 0.0008686  |
| rs1490013   | 23 | 39231086 T      | 8  | 37 G                  | 0.0008686  |
| rs12689301  | 23 | 39232009 T      | 8  | 37 G                  | 0.0008686  |
| rs67075788  | 23 | 39240429 A      | 8  | 37 AGAGGTAAAGGATGGCCA | 0.0008686  |
| rs12688992  | 23 | 39246849 C      | 8  | 37 A                  | 0.0008686  |
| rs729841    | 23 | 39251422 G      | 8  | 37 A                  | 0.0008686  |
| rs3034995   | 23 | 39251561 CGTAGG | 8  | 37 C                  | 0.0008686  |
| rs1472039   | 23 | 39252744 C      | 8  | 40 T                  | 0.0002504  |
| rs1472040   | 23 | 39252819 A      | 8  | 40 G                  | 0.0002504  |
| rs5963154   | 23 | 39918362 C      | 38 | 35 A                  | 0.0006427  |
| rs149891625 | 23 | 40121247 T      | 7  | 0 C                   | 0.0007305  |
| rs186199538 | 23 | 43700851 G      | 7  | 0 A                   | 0.0008679  |
| rs5902373   | 23 | 46224482 CA     | 36 | 32 C                  | 0.0009221  |
| rs5906188   | 23 | 46234266 A      | 36 | 32 C                  | 0.0006397  |
| rs5905532   | 23 | 46235267 T      | 36 | 32 C                  | 0.0005072  |
| rs62590007  | 23 | 46246592 C      | 8  | 43 T                  | 0.00007402 |
| rs73630223  | 23 | 46247540 T      | 37 | 32 G                  | 0.0003684  |

|             |    |            |    |            |            |
|-------------|----|------------|----|------------|------------|
| rs5952920   | 23 | 46539595 A | 2  | 22 C       | 0.0009379  |
| rs5905555   | 23 | 46540220 C | 2  | 22 A       | 0.0009583  |
| rs5905556   | 23 | 46542500 T | 2  | 22 C       | 0.0009379  |
| rs28445915  | 23 | 46544025 G | 2  | 22 A       | 0.0009583  |
| rs5952923   | 23 | 46549671 A | 2  | 22 C       | 0.0009583  |
| rs66832551  | 23 | 46550608 C | 2  | 22 CTG     | 0.0009583  |
| rs67496984  | 23 | 46552310 C | 2  | 22 T       | 0.0009583  |
| rs5906256   | 23 | 46557821 T | 2  | 22 C       | 0.0009583  |
| rs5906257   | 23 | 46558015 T | 2  | 22 G       | 0.0009583  |
| rs5952926   | 23 | 46562584 T | 2  | 22 C       | 0.0009583  |
| rs375309230 | 23 | 46566078 G | 2  | 22 GTGT    | 0.0009583  |
| rs4607750   | 23 | 46577646 T | 2  | 23 C       | 0.0005167  |
| rs35968392  | 23 | 46578551 T | 2  | 23 TA      | 0.0005167  |
| rs12394488  | 23 | 46579194 T | 2  | 23 C       | 0.0005167  |
| rs5906263   | 23 | 46582501 G | 2  | 23 A       | 0.0005167  |
| rs12397070  | 23 | 46586486 G | 2  | 23 C       | 0.0005167  |
| rs5906264   | 23 | 46587103 A | 2  | 23 G       | 0.0005167  |
| rs4258122   | 23 | 46592678 A | 2  | 23 G       | 0.0005855  |
| rs57634661  | 23 | 46593119 T | 2  | 23 TAGATTG | 0.0005855  |
| rs5906265   | 23 | 46593817 A | 2  | 23 G       | 0.0005167  |
| rs4824410   | 23 | 46598739 T | 2  | 23 G       | 0.0005167  |
| rs5906266   | 23 | 46598854 T | 2  | 23 A       | 0.0005167  |
| rs4824589   | 23 | 46606140 A | 2  | 23 G       | 0.0005167  |
| rs5906269   | 23 | 46607246 A | 2  | 23 C       | 0.0005167  |
| rs5906272   | 23 | 46608657 T | 2  | 23 C       | 0.0005167  |
| rs5906273   | 23 | 46615592 T | 2  | 23 C       | 0.0005167  |
| rs7061720   | 23 | 46616771 A | 2  | 23 G       | 0.0005167  |
| rs56185835  | 23 | 46937076 T | 30 | 22 A       | 0.0003565  |
| rs2854420   | 23 | 47423185 T | 9  | 42 A       | 0.0003081  |
| rs2854422   | 23 | 47425058 A | 8  | 42 G       | 0.0000745  |
| rs2854426   | 23 | 47427594 C | 8  | 42 G       | 0.0000745  |
| rs2858769   | 23 | 47430165 T | 8  | 41 C       | 0.0001361  |
| rs2854412   | 23 | 47430457 T | 8  | 41 A       | 0.0001361  |
| X:47430614  | 23 | 47430614 G | 6  | 36 GT      | 0.0001301  |
| rs62592099  | 23 | 47439278 A | 7  | 36 G       | 0.0003046  |
| rs111947105 | 23 | 47440161 C | 7  | 41 G       | 0.00002223 |
| rs55696512  | 23 | 47443111 A | 7  | 38 G       | 0.0001991  |
| rs6609534   | 23 | 47446653 A | 7  | 38 G       | 0.0001991  |
| rs5906434   | 23 | 47447159 G | 7  | 38 C       | 0.0001991  |
| rs6520278   | 23 | 47447924 T | 7  | 38 C       | 0.0001991  |
| rs12556415  | 23 | 47448275 A | 7  | 38 G       | 0.0001991  |

|             |    |            |    |       |             |
|-------------|----|------------|----|-------|-------------|
| rs5905614   | 23 | 47448276 A | 7  | 38 C  | 0.0001991   |
| rs5906435   | 23 | 47448410 T | 7  | 38 C  | 0.0001991   |
| rs4824621   | 23 | 47450276 C | 2  | 32 T  | 0.00000437  |
| rs4824622   | 23 | 47450580 C | 2  | 32 T  | 0.00000437  |
| rs62592125  | 23 | 47450949 A | 2  | 32 G  | 0.000002242 |
| rs5953061   | 23 | 47451476 C | 2  | 32 T  | 0.00000437  |
| rs5953062   | 23 | 47451559 A | 2  | 32 G  | 0.00000437  |
| rs73206134  | 23 | 47453025 C | 1  | 20 T  | 0.0004403   |
| rs5953063   | 23 | 47454598 A | 2  | 32 G  | 0.00000437  |
| rs5906437   | 23 | 47455346 G | 2  | 32 A  | 0.00000437  |
| rs9887335   | 23 | 47459125 G | 2  | 32 A  | 0.00000437  |
| rs5953066   | 23 | 47461549 T | 2  | 32 C  | 0.00000437  |
| rs4824424   | 23 | 47462630 T | 2  | 32 C  | 0.00000437  |
| rs4824623   | 23 | 47462631 G | 2  | 32 T  | 0.00000437  |
| rs140770289 | 23 | 51015458 A | 7  | 0 G   | 0.0008679   |
| rs143698215 | 23 | 51049831 C | 7  | 0 T   | 0.0008679   |
| X:51056474  | 23 | 51056474 A | 7  | 0 C   | 0.0008679   |
| rs144827840 | 23 | 51135633 T | 7  | 0 A   | 0.0008679   |
| rs141738881 | 23 | 51175298 T | 7  | 0 C   | 0.0008679   |
| X:61803232  | 23 | 61803232 A | 7  | 0 G   | 0.0008679   |
| rs143110708 | 23 | 69838040 T | 13 | 4 C   | 0.000981    |
| rs142361225 | 23 | 69935729 G | 12 | 45 A  | 0.0009266   |
| rs11795627  | 23 | 69957441 C | 15 | 52 T  | 0.0006042   |
| rs5936979   | 23 | 69976939 G | 8  | 42 A  | 0.0000745   |
| rs5936980   | 23 | 69982713 A | 5  | 32 G  | 0.0003626   |
| rs6625672   | 23 | 69984497 C | 8  | 42 T  | 0.0000745   |
| rs4844261   | 23 | 69994878 T | 5  | 31 G  | 0.0006549   |
| rs5936983   | 23 | 70001025 T | 9  | 41 C  | 0.0003404   |
| rs147402025 | 23 | 70004851 A | 9  | 41 T  | 0.0003404   |
| rs6625678   | 23 | 70006176 G | 9  | 41 A  | 0.0003404   |
| rs12164387  | 23 | 70006783 G | 9  | 41 A  | 0.0002923   |
| rs5936984   | 23 | 70010619 T | 9  | 41 A  | 0.0003404   |
| rs5936985   | 23 | 70011773 G | 9  | 41 A  | 0.0009997   |
| rs5936986   | 23 | 70013404 G | 9  | 41 A  | 0.0003404   |
| rs5936987   | 23 | 70016629 C | 7  | 41 T  | 0.00005212  |
| rs140007081 | 23 | 70018751 T | 7  | 41 TG | 0.00009932  |
| rs6625686   | 23 | 70029125 A | 7  | 41 G  | 0.00005212  |
| rs5936993   | 23 | 70034741 T | 7  | 41 A  | 0.00005212  |
| rs6625691   | 23 | 70043958 G | 7  | 41 C  | 0.00005212  |
| rs5937000   | 23 | 70047788 T | 9  | 46 C  | 0.00004283  |
| rs5937005   | 23 | 70077955 G | 7  | 42 A  | 0.00002668  |



|             |    |                |    |       |              |
|-------------|----|----------------|----|-------|--------------|
| rs6625698   | 23 | 70080295 G     | 7  | 42 A  | 0.00002668   |
| rs5937008   | 23 | 70093038 C     | 7  | 42 T  | 0.00002668   |
| rs150018032 | 23 | 70094743 A     | 14 | 5 G   | 0.0008508    |
| rs5936597   | 23 | 70095359 C     | 7  | 42 T  | 0.00005048   |
| rs200957850 | 23 | 70100415 AAAAC | 7  | 42 A  | 0.00002668   |
| rs201334832 | 23 | 70105023 TG    | 13 | 4 T   | 0.000883     |
| rs4617319   | 23 | 70108247 C     | 2  | 32 A  | 0.00000437   |
| rs13441058  | 23 | 70108862 C     | 3  | 32 G  | 0.00001994   |
| rs13441059  | 23 | 70108889 A     | 3  | 32 G  | 0.00001994   |
| rs7888597   | 23 | 70110790 G     | 7  | 43 A  | 0.00001382   |
| rs4300150   | 23 | 70111711 C     | 7  | 43 T  | 0.00001382   |
| rs5981026   | 23 | 70114332 T     | 8  | 41 C  | 0.0001237    |
| rs186347618 | 23 | 70117073 T     | 2  | 33 A  | 0.0000008804 |
| rs10672857  | 23 | 70117076 TAGA  | 2  | 33 T  | 0.000001897  |
| rs4560953   | 23 | 70122195 T     | 8  | 43 G  | 0.0000683    |
| rs62608084  | 23 | 70125103 A     | 2  | 32 G  | 0.000004243  |
| rs140342782 | 23 | 70127143 C     | 9  | 1 T   | 0.0004616    |
| rs5937022   | 23 | 70129087 G     | 7  | 44 A  | 0.000007255  |
| rs143608528 | 23 | 70132640 TA    | 2  | 31 T  | 0.00000434   |
| rs72628881  | 23 | 70137042 C     | 7  | 42 A  | 0.00001401   |
| rs5937024   | 23 | 70141643 G     | 10 | 44 T  | 0.0001738    |
| rs5937025   | 23 | 70142030 C     | 8  | 42 T  | 0.00006336   |
| rs4524964   | 23 | 70144801 T     | 2  | 34 C  | 0.000001049  |
| rs4360450   | 23 | 70146398 A     | 3  | 34 G  | 0.000009143  |
| rs7059898   | 23 | 70149078 A     | 3  | 32 C  | 0.00003815   |
| rs11291509  | 23 | 70149333 A     | 5  | 35 AC | 0.0000517    |
| rs5936607   | 23 | 70149404 C     | 7  | 44 T  | 0.000005685  |
| rs17216883  | 23 | 70151978 G     | 6  | 32 A  | 0.00098      |
| rs5937026   | 23 | 70153056 A     | 8  | 44 G  | 0.00003425   |
| rs6625717   | 23 | 70153585 C     | 8  | 44 T  | 0.00001695   |
| rs5936610   | 23 | 70156788 T     | 10 | 44 C  | 0.000219     |
| rs6625721   | 23 | 70157130 C     | 10 | 44 G  | 0.0001848    |
| X:70162038  | 23 | 70162038 TA    | 9  | 43 T  | 0.0001644    |
| rs189326428 | 23 | 70162078 A     | 9  | 43 G  | 0.0001644    |
| rs144301759 | 23 | 70162340 T     | 9  | 43 C  | 0.0001644    |
| X:70162627  | 23 | 70162627 G     | 9  | 1 T   | 0.0007194    |
| rs199714075 | 23 | 70162636 C     | 9  | 42 T  | 0.0003081    |
| rs4403555   | 23 | 70163272 A     | 9  | 43 T  | 0.0001644    |
| rs4402040   | 23 | 70163543 G     | 10 | 44 A  | 0.000219     |
| rs4484853   | 23 | 70163548 G     | 9  | 43 A  | 0.0001644    |
| rs6624521   | 23 | 70163620 G     | 10 | 44 A  | 0.000219     |

|             |    |                        |    |      |            |
|-------------|----|------------------------|----|------|------------|
| rs4463589   | 23 | 70163621 G             | 9  | 43 A | 0.0001644  |
| rs4370694   | 23 | 70163780 A             | 7  | 39 G | 0.0001964  |
| rs5937029   | 23 | 70164217 T             | 10 | 44 C | 0.000219   |
| rs12556778  | 23 | 70164825 G             | 10 | 44 A | 0.000219   |
| rs4320701   | 23 | 70167445 T             | 8  | 37 A | 0.0007955  |
| rs6625725   | 23 | 70168589 T             | 10 | 44 C | 0.000219   |
| rs5937033   | 23 | 70171574 G             | 11 | 44 A | 0.0007768  |
| rs5981041   | 23 | 70173331 C             | 10 | 44 A | 0.000219   |
| rs5936612   | 23 | 70173688 C             | 10 | 44 T | 0.000219   |
| rs5936613   | 23 | 70173743 C             | 10 | 44 A | 0.000219   |
| rs11094188  | 23 | 70173910 G             | 10 | 44 A | 0.000219   |
| rs11094189  | 23 | 70173972 C             | 10 | 44 T | 0.000219   |
| rs5937035   | 23 | 70175558 T             | 10 | 44 C | 0.000219   |
| rs4273986   | 23 | 70178305 A             | 10 | 42 G | 0.0006601  |
| rs4636364   | 23 | 70178323 C             | 10 | 42 T | 0.0006601  |
| rs6625728   | 23 | 70179024 T             | 10 | 44 A | 0.0001848  |
| rs111415036 | 23 | 70179591 G             | 10 | 44 A | 0.000219   |
| rs5937036   | 23 | 70180081 T             | 11 | 44 C | 0.0007768  |
| rs73214833  | 23 | 70181107 A             | 11 | 44 G | 0.0007768  |
| rs5936615   | 23 | 70182429 T             | 11 | 44 G | 0.0007768  |
| rs5937038   | 23 | 70184285 A             | 10 | 44 G | 0.000219   |
| rs5937039   | 23 | 70184830 C             | 10 | 44 T | 0.000219   |
| rs5981049   | 23 | 70185965 G             | 10 | 44 A | 0.000219   |
| rs11094191  | 23 | 70195929 C             | 11 | 43 T | 0.0008678  |
| rs199639085 | 23 | 70196617 ATTTTATTTTATT | 11 | 43 A | 0.0008678  |
| rs6625736   | 23 | 70197878 C             | 10 | 43 T | 0.0006662  |
| rs4592186   | 23 | 70201767 G             | 9  | 41 A | 0.0003404  |
| rs201401367 | 23 | 70202595 GT            | 9  | 41 G | 0.0003404  |
| rs6625747   | 23 | 70214437 C             | 9  | 41 T | 0.0003404  |
| rs5936617   | 23 | 70215816 T             | 9  | 41 G | 0.0003404  |
| rs6624525   | 23 | 70217433 G             | 9  | 41 A | 0.0003404  |
| rs5937052   | 23 | 70218306 T             | 9  | 39 C | 0.000596   |
| rs374777112 | 23 | 70222085 GAAGA         | 9  | 40 G | 0.000591   |
| rs5937058   | 23 | 70234170 T             | 10 | 41 C | 0.0006679  |
| rs139693845 | 23 | 76898316 C             | 0  | 15 T | 0.0005628  |
| rs138056129 | 23 | 76934081 T             | 0  | 15 C | 0.0005628  |
| X:77133371  | 23 | 77133371 TAC           | 37 | 26 T | 0.00001019 |
| rs73227653  | 23 | 77924400 G             | 3  | 27 T | 0.0002808  |
| rs2411753   | 23 | 78792528 A             | 33 | 27 G | 0.0005258  |
| rs12559776  | 23 | 78794135 A             | 31 | 24 C | 0.0004543  |
| rs5959402   | 23 | 78900345 A             | 15 | 51 T | 0.0006974  |

|             |    |                       |    |                        |           |
|-------------|----|-----------------------|----|------------------------|-----------|
| rs5959403   | 23 | 78900346 T            | 15 | 51 G                   | 0.0006974 |
| rs5959404   | 23 | 78901952 G            | 15 | 51 A                   | 0.0006974 |
| rs200171362 | 23 | 78906807 TGGGAGTGTAAG | 15 | 51 T                   | 0.0006974 |
| rs145845316 | 23 | 78908071 A            | 15 | 51 G                   | 0.0006974 |
| rs2411749   | 23 | 78910664 A            | 16 | 53 G                   | 0.0006806 |
| rs78463595  | 23 | 78911465 C            | 15 | 51 G                   | 0.0006974 |
| rs73237417  | 23 | 78912775 A            | 15 | 51 G                   | 0.0006974 |
| rs199862808 | 23 | 78913083 T            | 15 | 51 TTGATTTTTCTCGATTTTC | 0.0006974 |
| rs5958910   | 23 | 78914016 C            | 15 | 51 G                   | 0.0006974 |
| rs5959408   | 23 | 78914271 G            | 15 | 51 A                   | 0.0006974 |
| rs147252698 | 23 | 78926429 C            | 15 | 51 CAGA                | 0.0006974 |
| rs5958914   | 23 | 78928752 G            | 15 | 51 C                   | 0.0006974 |
| rs5958915   | 23 | 78928840 C            | 15 | 51 A                   | 0.0006974 |
| rs5958917   | 23 | 78931358 G            | 15 | 51 C                   | 0.0006974 |
| rs4826118   | 23 | 78932289 A            | 15 | 51 G                   | 0.0006974 |
| rs5959421   | 23 | 78933591 G            | 15 | 51 A                   | 0.0006974 |
| rs34858870  | 23 | 78934852 T            | 14 | 51 TA                  | 0.000328  |
| rs5959422   | 23 | 78935812 T            | 15 | 51 G                   | 0.0006974 |
| rs12690356  | 23 | 78936316 C            | 15 | 51 T                   | 0.0006974 |
| rs12687170  | 23 | 78936571 C            | 15 | 51 T                   | 0.0006974 |
| rs4826119   | 23 | 78939433 A            | 15 | 51 G                   | 0.0006974 |
| rs4826121   | 23 | 78941684 T            | 15 | 51 C                   | 0.0006974 |
| rs4131988   | 23 | 80977847 G            | 16 | 6 C                    | 0.0005436 |
| rs141979277 | 23 | 81185978 T            | 16 | 6 C                    | 0.0005436 |
| rs142819227 | 23 | 81191091 C            | 16 | 6 T                    | 0.0005436 |
| rs188005309 | 23 | 81306385 G            | 16 | 7 A                    | 0.0007388 |
| rs9698501   | 23 | 82020743 A            | 20 | 11 G                   | 0.0008202 |
| rs143205082 | 23 | 82170027 A            | 20 | 11 ATCTCT              | 0.0008202 |
| rs7061408   | 23 | 82187693 A            | 26 | 16 G                   | 0.0002858 |
| rs143878757 | 23 | 82201623 C            | 20 | 11 T                   | 0.0008202 |
| rs139453630 | 23 | 82207817 A            | 20 | 11 G                   | 0.0008202 |
| rs62617489  | 23 | 82236836 G            | 26 | 18 A                   | 0.0007809 |
| rs201394251 | 23 | 83406022 T            | 11 | 2 TAGAG                | 0.0006828 |
| rs145128705 | 23 | 83955996 C            | 13 | 48 G                   | 0.0005647 |
| X:86227739  | 23 | 86227739 T            | 2  | 21 C                   | 0.0007866 |
| rs5969294   | 23 | 86983288 C            | 0  | 18 G                   | 0.0001312 |
| rs6521963   | 23 | 86983765 G            | 0  | 18 A                   | 0.0001312 |
| rs5924097   | 23 | 86984262 C            | 0  | 18 A                   | 0.0001312 |
| rs5924099   | 23 | 86985145 C            | 0  | 18 T                   | 0.0001312 |
| rs6521964   | 23 | 86987258 T            | 0  | 18 C                   | 0.0001312 |
| rs5969296   | 23 | 86987339 G            | 0  | 18 A                   | 0.0001312 |

|             |    |             |    |           |           |
|-------------|----|-------------|----|-----------|-----------|
| rs140914166 | 23 | 87630602 A  | 18 | 9 G       | 0.0009279 |
| rs11093096  | 23 | 87724429 A  | 28 | 19 G      | 0.0002139 |
| rs188619341 | 23 | 88227718 A  | 0  | 14 C      | 0.0009501 |
| rs377141189 | 23 | 88462122 G  | 7  | 0 A       | 0.0008679 |
| X:88462136  | 23 | 88462136 T  | 8  | 0 C       | 0.0003016 |
| rs138389217 | 23 | 91790925 G  | 5  | 31 A      | 0.0006549 |
| rs34341230  | 23 | 91792732 TA | 5  | 30 T      | 0.0006526 |
| rs369536606 | 23 | 91798108 G  | 5  | 31 A      | 0.0006549 |
| rs3752336   | 23 | 92925839 C  | 9  | 1 A       | 0.0007194 |
| rs115854148 | 23 | 92997006 A  | 7  | 0 G       | 0.0008679 |
| rs147086984 | 23 | 93033488 A  | 7  | 0 G       | 0.0008679 |
| rs191091193 | 23 | 93046551 C  | 7  | 0 A       | 0.0008679 |
| rs143586699 | 23 | 94571371 C  | 11 | 2 CT      | 0.0004434 |
| rs6620228   | 23 | 96416258 C  | 33 | 27 G      | 0.0009278 |
| rs7051269   | 23 | 96424293 G  | 36 | 32 A      | 0.0006397 |
| rs2148100   | 23 | 96425266 C  | 35 | 29 T      | 0.0003069 |
| rs6620231   | 23 | 96426226 C  | 35 | 29 T      | 0.0003069 |
| rs5967084   | 23 | 96426401 G  | 35 | 29 T      | 0.0003069 |
| rs12014439  | 23 | 96436052 C  | 37 | 32 T      | 0.0003248 |
| rs5920815   | 23 | 96436380 G  | 37 | 32 A      | 0.0003248 |
| rs4007952   | 23 | 102446102 G | 11 | 2 GATGTAT | 0.0004434 |
| rs5987702   | 23 | 102449852 G | 11 | 2 A       | 0.0004434 |
| rs6621664   | 23 | 102678067 C | 31 | 23 T      | 0.0003729 |
| rs12839772  | 23 | 102701896 T | 8  | 0 C       | 0.0003016 |
| X:102714882 | 23 | 102714882 G | 13 | 4 C       | 0.000883  |
| rs5942626   | 23 | 109358807 G | 22 | 12 T      | 0.000477  |
| rs5942890   | 23 | 109362969 G | 19 | 9 A       | 0.0004395 |
| rs5985446   | 23 | 109365260 A | 19 | 9 T       | 0.0004395 |
| rs4893449   | 23 | 109365958 T | 19 | 9 C       | 0.0004395 |
| rs2185758   | 23 | 109366381 A | 19 | 9 T       | 0.0004395 |
| rs5942893   | 23 | 109367316 G | 19 | 9 A       | 0.0004395 |
| rs5942896   | 23 | 109368576 C | 19 | 9 T       | 0.0004395 |
| rs5942897   | 23 | 109368709 G | 19 | 9 A       | 0.0004395 |
| rs111527219 | 23 | 109369426 G | 19 | 9 GT      | 0.0004395 |
| rs5942628   | 23 | 109369578 C | 19 | 9 A       | 0.0004395 |
| rs4421522   | 23 | 109369916 T | 19 | 9 C       | 0.0004395 |
| rs143509714 | 23 | 109372340 C | 19 | 9 CT      | 0.0004395 |
| rs4893450   | 23 | 109374464 G | 19 | 9 C       | 0.0004395 |
| rs5942629   | 23 | 109375110 A | 19 | 9 G       | 0.0005118 |
| rs141911700 | 23 | 109770433 G | 9  | 1 A       | 0.0007194 |
| X:109846096 | 23 | 109846096 T | 9  | 1 C       | 0.0007194 |

|             |    |              |    |              |            |
|-------------|----|--------------|----|--------------|------------|
| rs149294490 | 23 | 109887848 G  | 9  | 1 A          | 0.0007194  |
| rs5943072   | 23 | 110110885 A  | 3  | 29 G         | 0.0001425  |
| rs57105424  | 23 | 110116493 GT | 3  | 29 G         | 0.0001425  |
| rs1556803   | 23 | 110186221 T  | 3  | 28 C         | 0.0001569  |
| rs5985312   | 23 | 110194225 A  | 3  | 28 G         | 0.0001569  |
| rs141590782 | 23 | 110212107 A  | 7  | 0 G          | 0.0008679  |
| rs73215431  | 23 | 112845399 G  | 9  | 1 T          | 0.0007194  |
| rs80131172  | 23 | 113643765 G  | 13 | 2 C          | 0.00007644 |
| rs148692510 | 23 | 113702367 T  | 13 | 4 C          | 0.000883   |
| rs150903498 | 23 | 114569770 T  | 16 | 6 C          | 0.0005436  |
| rs7884307   | 23 | 114574640 A  | 16 | 7 C          | 0.0009539  |
| rs73636279  | 23 | 114576213 C  | 16 | 7 A          | 0.0009539  |
| rs78902560  | 23 | 114578966 C  | 18 | 7 A          | 0.0001975  |
| rs73636280  | 23 | 114579062 T  | 18 | 7 C          | 0.0001975  |
| rs201116393 | 23 | 114579152 C  | 17 | 7 CCACACGGTA | 0.0004382  |
| rs148225485 | 23 | 114579323 A  | 17 | 7 C          | 0.0004382  |
| rs73580006  | 23 | 114579496 T  | 18 | 7 C          | 0.0001975  |
| rs7891269   | 23 | 114580249 C  | 18 | 7 T          | 0.0001975  |
| rs7886209   | 23 | 114580270 A  | 18 | 7 G          | 0.0001975  |
| rs7891410   | 23 | 114580274 C  | 18 | 7 T          | 0.0001975  |
| rs1884396   | 23 | 114580445 C  | 17 | 7 T          | 0.0004382  |
| rs375467466 | 23 | 114582884 T  | 16 | 7 G          | 0.0006018  |
| rs73580011  | 23 | 114583333 A  | 18 | 7 G          | 0.0001975  |
| rs73580014  | 23 | 114583399 C  | 17 | 7 A          | 0.0004382  |
| rs73580016  | 23 | 114583776 G  | 17 | 7 A          | 0.0004382  |
| rs73580018  | 23 | 114584158 C  | 18 | 7 T          | 0.0001975  |
| rs147457731 | 23 | 114584186 C  | 18 | 7 T          | 0.0001975  |
| rs73580019  | 23 | 114584656 C  | 18 | 7 T          | 0.0001975  |
| rs10521696  | 23 | 114584805 G  | 18 | 7 A          | 0.0001975  |
| rs73580022  | 23 | 114587083 A  | 18 | 7 T          | 0.0001975  |
| rs73580023  | 23 | 114587527 T  | 17 | 7 C          | 0.00034    |
| rs5987877   | 23 | 114587714 C  | 17 | 7 T          | 0.0004382  |
| rs5987878   | 23 | 114587792 C  | 17 | 7 T          | 0.0005099  |
| rs17095493  | 23 | 114588167 T  | 18 | 7 A          | 0.0001975  |
| rs112945252 | 23 | 114588241 A  | 17 | 7 G          | 0.0004382  |
| rs4911795   | 23 | 114589262 G  | 18 | 7 T          | 0.0001975  |
| rs59969921  | 23 | 114589858 G  | 18 | 7 A          | 0.0001975  |
| rs4911814   | 23 | 114590155 C  | 17 | 7 T          | 0.0004382  |
| rs4911816   | 23 | 114590336 A  | 18 | 7 G          | 0.0001975  |
| rs1321125   | 23 | 114591500 G  | 17 | 7 C          | 0.0004382  |
| rs2231      | 23 | 114591894 C  | 18 | 7 T          | 0.0002294  |

|             |    |             |    |       |           |
|-------------|----|-------------|----|-------|-----------|
| rs5987726   | 23 | 114591955 C | 18 | 7 T   | 0.0001975 |
| rs73580032  | 23 | 114592176 A | 17 | 7 G   | 0.0004382 |
| rs73580034  | 23 | 114592197 A | 17 | 7 G   | 0.0004382 |
| rs1853000   | 23 | 114593037 G | 17 | 7 A   | 0.0004382 |
| rs1853001   | 23 | 114593073 C | 18 | 7 T   | 0.0001975 |
| rs59121764  | 23 | 114594049 C | 18 | 7 T   | 0.0001975 |
| rs35036780  | 23 | 114594708 G | 18 | 7 A   | 0.0001975 |
| rs113910546 | 23 | 114595258 A | 18 | 7 G   | 0.0001975 |
| rs112652023 | 23 | 114596923 A | 18 | 7 G   | 0.0001975 |
| rs725102    | 23 | 114601290 G | 18 | 7 A   | 0.0001975 |
| rs112071098 | 23 | 114604239 A | 18 | 7 C   | 0.0001975 |
| rs7892307   | 23 | 114605041 G | 18 | 7 T   | 0.0001975 |
| rs1016237   | 23 | 114608863 T | 18 | 7 C   | 0.0001975 |
| rs12014903  | 23 | 114611273 A | 18 | 7 C   | 0.0001975 |
| rs139564840 | 23 | 114611882 C | 18 | 7 T   | 0.0001975 |
| rs73580071  | 23 | 114612927 T | 18 | 7 C   | 0.0001975 |
| rs141250214 | 23 | 114616333 C | 18 | 7 G   | 0.0001975 |
| rs73580080  | 23 | 114620385 A | 18 | 9 G   | 0.0009279 |
| rs73580081  | 23 | 114620414 A | 18 | 9 G   | 0.0009279 |
| rs73580092  | 23 | 114625847 T | 18 | 9 C   | 0.0009279 |
| rs28380553  | 23 | 114634849 T | 18 | 9 G   | 0.0009279 |
| rs111670357 | 23 | 114637227 C | 18 | 9 T   | 0.0009279 |
| rs17260677  | 23 | 114637278 A | 18 | 9 G   | 0.0009279 |
| rs113966797 | 23 | 114640655 C | 18 | 9 T   | 0.0009279 |
| rs4911820   | 23 | 114641418 T | 19 | 9 C   | 0.0004395 |
| rs17326548  | 23 | 114644730 C | 18 | 9 G   | 0.0009279 |
| rs4911821   | 23 | 114645027 T | 19 | 9 C   | 0.0004395 |
| rs59067332  | 23 | 114723192 C | 23 | 14 T  | 0.0007414 |
| rs73577794  | 23 | 114724262 T | 21 | 12 G  | 0.0008432 |
| rs73577800  | 23 | 114725164 A | 23 | 14 G  | 0.0007414 |
| rs2895154   | 23 | 114725960 G | 22 | 12 T  | 0.0005137 |
| rs72605210  | 23 | 115120693 T | 31 | 25 C  | 0.0008555 |
| rs7057172   | 23 | 115797756 A | 37 | 32 G  | 0.0003248 |
| rs1506960   | 23 | 115798129 T | 37 | 32 C  | 0.0003248 |
| rs5956740   | 23 | 115799907 C | 37 | 32 G  | 0.0003248 |
| rs5911731   | 23 | 115807323 T | 37 | 32 C  | 0.0003248 |
| rs34339026  | 23 | 115816699 C | 17 | 56 CT | 0.0002611 |
| rs150495951 | 23 | 116493773 C | 7  | 0 A   | 0.0008679 |
| rs200125552 | 23 | 116596157 C | 12 | 2 A   | 0.0001711 |
| rs438070    | 23 | 118625275 T | 0  | 17 C  | 0.0002538 |
| rs5909632   | 23 | 118664198 A | 0  | 16 G  | 0.0005294 |

|             |    |              |    |          |            |
|-------------|----|--------------|----|----------|------------|
| rs139282281 | 23 | 118758234 A  | 10 | 0 G      | 0.00003497 |
| rs147315460 | 23 | 118867070 T  | 0  | 15 C     | 0.0005301  |
| rs194291    | 23 | 119055950 A  | 14 | 50 G     | 0.0005849  |
| rs194292    | 23 | 119055971 C  | 14 | 50 A     | 0.0005849  |
| rs194293    | 23 | 119057291 C  | 14 | 50 T     | 0.0005849  |
| rs194296    | 23 | 119060622 C  | 14 | 50 T     | 0.0005849  |
| rs7883407   | 23 | 119060900 C  | 12 | 51 T     | 0.0001199  |
| rs194297    | 23 | 119061588 A  | 14 | 50 G     | 0.0005849  |
| rs194302    | 23 | 119065893 G  | 14 | 50 A     | 0.0005849  |
| rs194303    | 23 | 119066586 G  | 14 | 50 C     | 0.0005849  |
| rs194307    | 23 | 119070411 T  | 14 | 50 A     | 0.0005849  |
| rs194308    | 23 | 119070567 A  | 14 | 50 T     | 0.0005849  |
| rs194317    | 23 | 119075883 T  | 14 | 50 C     | 0.0005849  |
| rs194318    | 23 | 119076675 T  | 14 | 50 C     | 0.0003177  |
| rs194321    | 23 | 119080626 T  | 14 | 50 C     | 0.0005849  |
| rs5910713   | 23 | 119082081 T  | 14 | 50 G     | 0.0005849  |
| rs72062566  | 23 | 119083223 T  | 14 | 50 TTAAC | 0.0005849  |
| rs5909671   | 23 | 119090750 G  | 14 | 50 T     | 0.0005849  |
| rs138142471 | 23 | 119100107 G  | 14 | 50 A     | 0.0003177  |
| rs62612907  | 23 | 119100673 T  | 14 | 50 G     | 0.0005849  |
| rs2190332   | 23 | 119124658 C  | 16 | 52 G     | 0.0006549  |
| rs1468423   | 23 | 119128195 A  | 16 | 53 G     | 0.0006806  |
| rs62601344  | 23 | 121230701 T  | 7  | 0 C      | 0.0008679  |
| rs62603761  | 23 | 121311457 A  | 9  | 1 G      | 0.0007194  |
| rs5909899   | 23 | 121806218 A  | 22 | 13 G     | 0.0006749  |
| rs4542067   | 23 | 121820256 A  | 23 | 12 C     | 0.0002434  |
| rs35232625  | 23 | 121821449 A  | 23 | 12 AT    | 0.0002434  |
| rs5909901   | 23 | 121825773 G  | 22 | 12 A     | 0.000477   |
| rs4289947   | 23 | 121831400 C  | 33 | 28 A     | 0.0005106  |
| rs5911385   | 23 | 121833540 T  | 23 | 12 G     | 0.0002434  |
| rs4436257   | 23 | 121841990 G  | 23 | 12 A     | 0.0002434  |
| rs66569928  | 23 | 121850214 T  | 21 | 12 TA    | 0.0009012  |
| rs5911397   | 23 | 121850402 T  | 24 | 14 C     | 0.0003806  |
| rs6608007   | 23 | 121850699 T  | 24 | 14 A     | 0.0003806  |
| rs526716    | 23 | 122546969 T  | 25 | 14 C     | 0.0001947  |
| rs35941521  | 23 | 123208682 C  | 14 | 4 T      | 0.0003939  |
| rs34543054  | 23 | 123602533 C  | 38 | 35 T     | 0.0006427  |
| rs35783045  | 23 | 123602802 C  | 36 | 31 CCT   | 0.0003502  |
| rs201775061 | 23 | 123647006 AG | 4  | 28 A     | 0.0008078  |
| rs7051106   | 23 | 123809595 T  | 0  | 14 A     | 0.0008416  |
| rs7051135   | 23 | 123809651 G  | 0  | 14 A     | 0.0008879  |

|             |    |              |    |          |           |
|-------------|----|--------------|----|----------|-----------|
| rs5956678   | 23 | 123829661 G  | 0  | 14 T     | 0.0009501 |
| rs5932467   | 23 | 127763077 C  | 0  | 15 G     | 0.0005628 |
| rs7892367   | 23 | 127763657 T  | 0  | 15 C     | 0.0005628 |
| rs5932470   | 23 | 127767395 G  | 0  | 15 A     | 0.0005628 |
| rs73223309  | 23 | 127770888 T  | 0  | 15 C     | 0.0005628 |
| rs72435158  | 23 | 127773725 A  | 0  | 15 ATATC | 0.0005628 |
| rs5976838   | 23 | 127778738 T  | 0  | 15 C     | 0.0005628 |
| rs5976839   | 23 | 127780694 C  | 0  | 15 T     | 0.0005628 |
| rs10218225  | 23 | 127785423 A  | 0  | 15 G     | 0.0005628 |
| rs2071706   | 23 | 128724525 A  | 6  | 32 G     | 0.00098   |
| rs148044293 | 23 | 132414633 A  | 24 | 15 G     | 0.0005235 |
| rs2073051   | 23 | 132473645 A  | 6  | 35 G     | 0.0002764 |
| rs5933394   | 23 | 133383423 G  | 16 | 5 T      | 0.0001054 |
| rs139859148 | 23 | 133515780 T  | 14 | 5 C      | 0.0008508 |
| rs518667    | 23 | 138077510 C  | 0  | 15 T     | 0.0005628 |
| rs78974273  | 23 | 138079591 A  | 0  | 15 AC    | 0.0005628 |
| rs579260    | 23 | 138086137 T  | 0  | 15 C     | 0.0005628 |
| rs500096    | 23 | 138087155 G  | 0  | 15 C     | 0.0005628 |
| rs565127    | 23 | 138088701 C  | 0  | 15 T     | 0.0005628 |
| rs472273    | 23 | 138097159 G  | 0  | 15 C     | 0.0005628 |
| rs2179589   | 23 | 138097310 G  | 0  | 15 A     | 0.0005628 |
| rs566187    | 23 | 138098674 A  | 0  | 15 T     | 0.0005628 |
| rs496732    | 23 | 138099648 T  | 0  | 15 C     | 0.0005082 |
| rs490787    | 23 | 138100179 G  | 0  | 15 A     | 0.0005628 |
| rs512809    | 23 | 138101612 C  | 0  | 15 A     | 0.0005082 |
| rs471600    | 23 | 138101814 G  | 0  | 15 A     | 0.0005628 |
| rs482328    | 23 | 138102649 C  | 0  | 15 T     | 0.0005628 |
| rs483419    | 23 | 138105978 C  | 0  | 15 T     | 0.0005628 |
| rs497635    | 23 | 138106122 T  | 0  | 15 G     | 0.0005628 |
| rs578264    | 23 | 138107101 C  | 0  | 15 T     | 0.0005628 |
| rs515444    | 23 | 138107138 G  | 0  | 15 A     | 0.0005628 |
| rs519841    | 23 | 138108803 C  | 0  | 15 T     | 0.0005628 |
| rs149173046 | 23 | 138110078 C  | 0  | 15 CAAGA | 0.0005628 |
| rs693310    | 23 | 138110176 C  | 0  | 15 T     | 0.0005628 |
| rs5931560   | 23 | 138110307 A  | 0  | 15 G     | 0.0005628 |
| rs526093    | 23 | 138111126 G  | 0  | 15 A     | 0.0005628 |
| rs477821    | 23 | 138111932 A  | 0  | 15 G     | 0.0005628 |
| rs6635762   | 23 | 138113107 A  | 0  | 15 G     | 0.0005628 |
| rs67703366  | 23 | 138113374 CA | 0  | 15 C     | 0.0005628 |
| rs79440397  | 23 | 138113382 A  | 0  | 15 T     | 0.0005628 |
| rs17001950  | 23 | 138114091 G  | 0  | 15 C     | 0.0005628 |



|             |    |             |    |               |           |
|-------------|----|-------------|----|---------------|-----------|
| rs60643249  | 23 | 138114217 A | 0  | 15 G          | 0.0005628 |
| rs62602197  | 23 | 138114331 A | 0  | 15 G          | 0.0005628 |
| rs61245857  | 23 | 138114383 G | 0  | 15 A          | 0.0005628 |
| rs6634042   | 23 | 138114720 C | 0  | 15 A          | 0.0005628 |
| rs7884030   | 23 | 138115512 C | 0  | 15 T          | 0.0005628 |
| rs7883424   | 23 | 138115569 A | 0  | 15 G          | 0.0005628 |
| rs17001957  | 23 | 138116229 C | 0  | 15 A          | 0.0005628 |
| rs62602201  | 23 | 138116536 A | 0  | 15 G          | 0.0005628 |
| rs62602202  | 23 | 138117015 C | 0  | 15 T          | 0.0005628 |
| rs16993529  | 23 | 138117256 T | 0  | 15 C          | 0.0005628 |
| rs10521792  | 23 | 138117409 G | 0  | 15 A          | 0.0005628 |
| rs17001960  | 23 | 138119216 A | 0  | 15 T          | 0.0005628 |
| rs62602203  | 23 | 138119644 C | 0  | 15 A          | 0.0005628 |
| rs62602204  | 23 | 138119702 A | 0  | 15 T          | 0.0005628 |
| rs112015472 | 23 | 138119748 A | 0  | 15 T          | 0.0005628 |
| rs7889036   | 23 | 138119874 T | 0  | 15 A          | 0.0005628 |
| rs62602205  | 23 | 138120458 A | 0  | 15 G          | 0.0005082 |
| rs12558011  | 23 | 138120702 T | 0  | 15 A          | 0.0005628 |
| rs12556537  | 23 | 138120938 C | 0  | 15 T          | 0.0005628 |
| rs17001963  | 23 | 138122394 T | 0  | 15 G          | 0.0005628 |
| rs62602208  | 23 | 138126601 C | 0  | 15 A          | 0.0005628 |
| rs62602209  | 23 | 138127036 G | 0  | 15 A          | 0.0005628 |
| rs2103610   | 23 | 138127481 A | 0  | 15 G          | 0.0005628 |
| rs112592286 | 23 | 138128310 C | 0  | 15 CCTCAGGAAG | 0.0005628 |
| rs62602236  | 23 | 138128358 A | 0  | 15 G          | 0.0005628 |
| rs12560172  | 23 | 138130418 C | 0  | 15 T          | 0.0005628 |
| rs62602238  | 23 | 138130921 C | 0  | 15 T          | 0.0005628 |
| rs62602239  | 23 | 138133918 G | 0  | 15 T          | 0.0005628 |
| rs62602240  | 23 | 138134536 G | 0  | 15 A          | 0.0005628 |
| rs62602241  | 23 | 138134795 T | 0  | 15 C          | 0.0005628 |
| rs1080166   | 23 | 138137774 C | 0  | 15 T          | 0.0005628 |
| rs62602242  | 23 | 138140150 C | 0  | 15 T          | 0.0005628 |
| rs7877464   | 23 | 138140408 G | 0  | 15 A          | 0.0005628 |
| rs12556549  | 23 | 138140736 T | 0  | 15 G          | 0.0005628 |
| rs62602243  | 23 | 138142110 A | 0  | 15 G          | 0.0005628 |
| rs374366794 | 23 | 138143770 A | 0  | 15 AT         | 0.0005628 |
| rs113373639 | 23 | 138144111 C | 0  | 15 CTTA       | 0.0005628 |
| rs138951453 | 23 | 138152160 C | 0  | 15 T          | 0.0005628 |
| rs112600886 | 23 | 138154239 A | 0  | 15 G          | 0.0005628 |
| rs5931567   | 23 | 138160113 T | 33 | 26 A          | 0.0002784 |
| rs62603179  | 23 | 138166155 G | 0  | 15 A          | 0.0005628 |

|             |    |                 |    |           |            |
|-------------|----|-----------------|----|-----------|------------|
| rs62603180  | 23 | 138177022 T     | 0  | 15 C      | 0.0005628  |
| rs62603185  | 23 | 138183067 G     | 0  | 15 A      | 0.0005628  |
| rs17331422  | 23 | 138187934 G     | 0  | 15 A      | 0.0005628  |
| rs979128    | 23 | 138188114 C     | 0  | 15 A      | 0.0005628  |
| rs5907727   | 23 | 140002404 T     | 8  | 37 C      | 0.0008686  |
| rs62600825  | 23 | 141963178 T     | 20 | 11 C      | 0.0008202  |
| rs2223452   | 23 | 141964914 A     | 23 | 14 G      | 0.0007414  |
| rs5904083   | 23 | 141964932 C     | 23 | 14 CT     | 0.0008216  |
| rs12839812  | 23 | 141965807 A     | 23 | 14 G      | 0.0007414  |
| rs34057690  | 23 | 141982184 CTTGA | 27 | 19 C      | 0.0008555  |
| rs12557040  | 23 | 141982219 T     | 26 | 18 C      | 0.0007809  |
| rs2865824   | 23 | 142709722 G     | 6  | 38 A      | 0.00007454 |
| rs993478    | 23 | 142711939 C     | 6  | 38 T      | 0.00007454 |
| rs35807313  | 23 | 142712351 GT    | 6  | 38 G      | 0.00007454 |
| rs5908730   | 23 | 142713590 G     | 6  | 35 A      | 0.0002764  |
| rs5907447   | 23 | 142719576 A     | 6  | 38 T      | 0.00007454 |
| rs5907448   | 23 | 142719596 C     | 6  | 38 T      | 0.00007454 |
| rs5907449   | 23 | 142719599 A     | 6  | 38 T      | 0.00007454 |
| rs2038319   | 23 | 142727441 C     | 4  | 28 T      | 0.0008078  |
| rs5907452   | 23 | 142730813 G     | 4  | 30 A      | 0.0002486  |
| rs2903195   | 23 | 142740479 A     | 4  | 30 G      | 0.0002486  |
| rs74769907  | 23 | 143200302 C     | 30 | 18 T      | 0.00002692 |
| rs77429583  | 23 | 143200330 G     | 30 | 18 T      | 0.00002692 |
| rs147021978 | 23 | 143344123 A     | 8  | 0 G       | 0.000247   |
| rs5919645   | 23 | 143879419 C     | 0  | 20 A      | 0.0000355  |
| rs1585276   | 23 | 144251790 A     | 24 | 15 G      | 0.0005235  |
| rs145921180 | 23 | 144431263 T     | 7  | 0 A       | 0.0008679  |
| rs12557016  | 23 | 144731102 A     | 8  | 0 G       | 0.0003016  |
| rs17319419  | 23 | 144732953 T     | 8  | 0 C       | 0.0003016  |
| rs3852999   | 23 | 144735602 C     | 8  | 0 T       | 0.0003016  |
| rs3865789   | 23 | 144735612 G     | 8  | 0 A       | 0.0003016  |
| rs6626048   | 23 | 144741204 C     | 8  | 0 G       | 0.0003016  |
| rs72608976  | 23 | 144746769 A     | 8  | 0 G       | 0.0003016  |
| rs6525626   | 23 | 144752754 C     | 7  | 0 T       | 0.0008679  |
| rs17319426  | 23 | 144757656 A     | 8  | 0 G       | 0.0003016  |
| rs12847976  | 23 | 145613433 T     | 30 | 23 G      | 0.0007082  |
| rs6525699   | 23 | 145621372 C     | 26 | 18 G      | 0.0007809  |
| rs5920210   | 23 | 145623452 A     | 26 | 18 G      | 0.0007809  |
| rs2207942   | 23 | 145630047 C     | 20 | 7 T       | 0.00003885 |
| rs10521858  | 23 | 145630262 A     | 20 | 7 C       | 0.00003885 |
| X:145630523 | 23 | 145630523 C     | 19 | 7 CCCACTT | 0.00008788 |

|             |    |             |    |           |             |
|-------------|----|-------------|----|-----------|-------------|
| X:145630534 | 23 | 145630534 G | 19 | 7 C       | 0.00008788  |
| X:145630535 | 23 | 145630535 T | 19 | 7 C       | 0.00008788  |
| X:145630536 | 23 | 145630536 G | 19 | 7 C       | 0.00008788  |
| X:145630539 | 23 | 145630539 T | 19 | 7 A       | 0.00008788  |
| rs202182192 | 23 | 145630542 T | 19 | 7 TAG     | 0.00008788  |
| rs12689781  | 23 | 145630720 T | 20 | 7 C       | 0.00003885  |
| rs2385657   | 23 | 145631205 A | 20 | 7 G       | 0.00003885  |
| rs5920219   | 23 | 145631330 G | 20 | 7 C       | 0.00003885  |
| rs2224194   | 23 | 145633069 T | 20 | 7 C       | 0.00003885  |
| rs5966255   | 23 | 145634017 T | 20 | 6 C       | 0.00001074  |
| rs5920220   | 23 | 145637758 T | 19 | 6 G       | 0.00002708  |
| rs199692010 | 23 | 145638047 T | 20 | 8 TTTTA   | 0.00007555  |
| rs5966261   | 23 | 145641460 G | 20 | 7 A       | 0.00003885  |
| rs5920227   | 23 | 145644014 G | 20 | 7 A       | 0.00003885  |
| rs12688276  | 23 | 145645486 T | 19 | 6 G       | 0.00002708  |
| rs5920228   | 23 | 145646314 G | 20 | 6 A       | 0.00001074  |
| rs6626142   | 23 | 145647815 G | 19 | 7 T       | 0.00008788  |
| rs7061576   | 23 | 145649065 T | 20 | 7 A       | 0.00003885  |
| rs1033646   | 23 | 145649246 C | 20 | 7 T       | 0.00003885  |
| rs1033647   | 23 | 145649326 A | 20 | 7 G       | 0.00003885  |
| rs1033648   | 23 | 145649595 G | 20 | 7 T       | 0.00003885  |
| rs5919714   | 23 | 145649944 G | 20 | 7 A       | 0.00003885  |
| rs1033649   | 23 | 145650329 C | 20 | 7 T       | 0.00003885  |
| rs1033651   | 23 | 145650554 C | 20 | 7 A       | 0.00003885  |
| rs5920231   | 23 | 145651231 G | 19 | 6 A       | 0.00002708  |
| rs5966265   | 23 | 145653988 A | 17 | 6 G       | 0.0002592   |
| rs5966266   | 23 | 145658240 T | 19 | 6 A       | 0.00002708  |
| rs1116419   | 23 | 145659829 C | 20 | 6 T       | 0.00001074  |
| rs1118070   | 23 | 145661708 A | 20 | 6 C       | 0.00001074  |
| rs369026644 | 23 | 145661896 G | 19 | 6 GT      | 0.00002708  |
| rs73240086  | 23 | 145666370 A | 20 | 6 T       | 0.00001074  |
| rs368541187 | 23 | 145668384 T | 19 | 6 TTATTGA | 0.00002708  |
| rs79144050  | 23 | 145668395 G | 19 | 6 A       | 0.00002708  |
| rs34264217  | 23 | 145670465 G | 19 | 6 T       | 0.00002708  |
| rs12853269  | 23 | 145672354 C | 23 | 9 T       | 0.00002126  |
| rs12855563  | 23 | 145672954 G | 24 | 9 T       | 0.000004665 |
| rs12855872  | 23 | 145672989 C | 24 | 9 T       | 0.000004665 |
| rs61548656  | 23 | 145673230 C | 28 | 20 G      | 0.0005398   |
| rs5920237   | 23 | 145674023 A | 20 | 5 G       | 0.000004766 |
| rs60071470  | 23 | 145674985 A | 20 | 6 ATG     | 0.00001339  |
| rs6626660   | 23 | 145680046 A | 20 | 5 G       | 0.000004766 |

|             |    |               |    |       |             |
|-------------|----|---------------|----|-------|-------------|
| rs5919717   | 23 | 145681309 A   | 18 | 5 C   | 0.000008779 |
| rs6626148   | 23 | 145694582 G   | 18 | 5 C   | 0.00002769  |
| rs959605    | 23 | 145698003 C   | 18 | 5 T   | 0.00002769  |
| rs4319233   | 23 | 145703297 C   | 18 | 5 G   | 0.00003231  |
| rs2891884   | 23 | 145703928 G   | 18 | 5 A   | 0.00002769  |
| rs381365    | 23 | 145748908 T   | 18 | 4 G   | 0.00000678  |
| rs407585    | 23 | 145767522 T   | 18 | 4 A   | 0.00000678  |
| rs445978    | 23 | 145788647 T   | 18 | 5 A   | 0.00002392  |
| rs1620816   | 23 | 145796549 A   | 18 | 5 G   | 0.00002769  |
| rs5951923   | 23 | 146156542 A   | 39 | 34 G  | 0.0001692   |
| rs2442040   | 23 | 146351375 G   | 29 | 21 T  | 0.0005775   |
| rs5905048   | 23 | 146496477 G   | 15 | 56 T  | 0.0000815   |
| rs2064336   | 23 | 149544089 A   | 7  | 40 G  | 0.0001027   |
| rs180495    | 23 | 150326325 G   | 5  | 33 A  | 0.0002023   |
| rs180496    | 23 | 150330311 A   | 6  | 33 G  | 0.0009098   |
| rs9698833   | 23 | 150836609 T   | 6  | 34 A  | 0.0005004   |
| X:151164833 | 23 | 151164833 A   | 1  | 20 T  | 0.0004893   |
| rs77731008  | 23 | 151203666 G   | 8  | 37 A  | 0.0008686   |
| rs4495590   | 23 | 151205238 T   | 1  | 21 C  | 0.0002339   |
| rs4433304   | 23 | 151206198 G   | 1  | 21 C  | 0.0002339   |
| rs4828697   | 23 | 151666727 C   | 21 | 12 T  | 0.0009318   |
| rs112671205 | 23 | 151692719 C   | 16 | 7 CTG | 0.0007333   |
| rs200866541 | 23 | 151717749 A   | 17 | 7 C   | 0.0009525   |
| rs5987101   | 23 | 152679963 A   | 13 | 47 G  | 0.0009845   |
| X:153565589 | 23 | 153565589 CAA | 8  | 0 C   | 0.0003016   |
| rs6642243   | 23 | 154404057 A   | 19 | 8 C   | 0.0003064   |
| rs6567793   | 23 | 154408041 A   | 32 | 18 G  | 0.000005019 |
| rs199802338 | 23 | 154412526 T   | 25 | 16 C  | 0.0005585   |
| rs6642392   | 23 | 154416077 G   | 31 | 17 T  | 0.000004945 |
| rs3105274   | 23 | 154416937 A   | 31 | 17 G  | 0.000004945 |
| rs149642500 | 23 | 154418896 T   | 31 | 17 A  | 0.000004945 |
| rs581225    | 23 | 154419122 T   | 37 | 23 A  | 0.000001043 |
| rs495251    | 23 | 154422423 A   | 31 | 17 G  | 0.000004945 |
| rs6567813   | 23 | 154423133 T   | 26 | 16 C  | 0.0002858   |
| rs488312    | 23 | 154423899 G   | 32 | 18 C  | 0.000005019 |
| rs150862266 | 23 | 154426668 C   | 31 | 17 G  | 0.000004945 |
| rs139630104 | 23 | 154428021 A   | 32 | 18 T  | 0.000005019 |
| rs4893075   | 23 | 154429214 G   | 32 | 18 A  | 0.000005019 |
| rs149859098 | 23 | 154430778 A   | 26 | 16 G  | 0.0002858   |
| rs5983645   | 23 | 154431612 C   | 37 | 24 T  | 0.000005162 |
| rs11156599  | 23 | 154431803 T   | 32 | 18 C  | 0.000005019 |

|             |    |              |    |      |             |
|-------------|----|--------------|----|------|-------------|
| rs12395768  | 23 | 154431805 T  | 26 | 16 C | 0.0002858   |
| rs5983644   | 23 | 154434658 T  | 26 | 16 C | 0.0001243   |
| rs73641118  | 23 | 154437045 G  | 26 | 16 A | 0.0002858   |
| rs73641119  | 23 | 154437056 C  | 26 | 16 T | 0.0002858   |
| rs573189    | 23 | 154437617 C  | 37 | 24 T | 0.000002425 |
| rs573158    | 23 | 154437629 G  | 32 | 18 A | 0.000005019 |
| rs11156600  | 23 | 154440161 C  | 30 | 16 T | 0.00000736  |
| rs499669    | 23 | 154442443 C  | 32 | 18 G | 0.000005019 |
| rs480210    | 23 | 154446014 C  | 33 | 23 T | 0.00005195  |
| rs3105280   | 23 | 154451785 C  | 31 | 18 T | 0.00001169  |
| rs150847435 | 23 | 154452126 T  | 27 | 18 C | 0.0001465   |
| rs35296872  | 23 | 154454087 G  | 25 | 16 A | 0.0005585   |
| rs73569697  | 23 | 154458814 A  | 25 | 16 G | 0.0005585   |
| rs11887     | 23 | 154467457 T  | 31 | 18 C | 0.00001169  |
| rs35943578  | 23 | 154468825 T  | 25 | 16 C | 0.0005585   |
| rs73571105  | 23 | 154478027 T  | 25 | 16 C | 0.000624    |
| rs547447    | 23 | 154479421 T  | 25 | 16 C | 0.0005585   |
| rs475025    | 23 | 154484937 G  | 25 | 16 A | 0.0005585   |
| rs3105275   | 23 | 154488432 A  | 26 | 16 G | 0.0002858   |
| rs543054    | 23 | 154493106 G  | 26 | 16 A | 0.0002858   |
| rs573572    | 23 | 154494178 T  | 26 | 16 C | 0.0002858   |
| rs3105276   | 23 | 154495049 A  | 26 | 16 G | 0.0002858   |
| rs3105277   | 23 | 154495135 G  | 23 | 13 T | 0.0002775   |
| rs200023018 | 23 | 154495668 GT | 24 | 16 G | 0.0005508   |
| rs3105278   | 23 | 154495927 A  | 26 | 16 G | 0.0002858   |
| rs523614    | 23 | 154496166 C  | 26 | 16 T | 0.0002858   |
| rs485957    | 23 | 154497242 G  | 26 | 16 T | 0.0002858   |
| rs3105279   | 23 | 154497666 C  | 32 | 18 A | 0.000005019 |
| rs578365    | 23 | 154498348 C  | 26 | 16 T | 0.0002858   |
| rs498535    | 23 | 154498524 G  | 26 | 16 A | 0.0002858   |
| rs492622    | 23 | 154498668 T  | 26 | 16 C | 0.0003104   |
| rs503202    | 23 | 154499056 T  | 26 | 16 C | 0.0002858   |
| rs496583    | 23 | 154499139 T  | 26 | 16 G | 0.0002858   |
| rs524668    | 23 | 154499876 A  | 26 | 16 C | 0.0002858   |
| rs527473    | 23 | 154500175 T  | 26 | 16 C | 0.0002858   |
| rs536181    | 23 | 154500374 C  | 26 | 16 T | 0.0002858   |
| rs557984    | 23 | 154500421 A  | 26 | 16 G | 0.0002858   |
| rs5983694   | 23 | 154503045 T  | 26 | 16 G | 0.0002858   |
| rs7891581   | 23 | 154503266 T  | 26 | 16 A | 0.0002858   |
| rs525161    | 23 | 154505745 G  | 26 | 16 A | 0.0002858   |
| rs559165    | 23 | 154507173 G  | 26 | 16 T | 0.0002858   |

|             |    |              |    |      |             |
|-------------|----|--------------|----|------|-------------|
| rs515165    | 23 | 154508027 G  | 26 | 16 C | 0.0002858   |
| rs544582    | 23 | 154508954 G  | 26 | 16 A | 0.0002858   |
| rs3120732   | 23 | 154509719 C  | 26 | 16 T | 0.0002858   |
| rs3120731   | 23 | 154509738 G  | 26 | 16 T | 0.0002858   |
| rs812476    | 23 | 154512854 C  | 26 | 15 T | 0.0001216   |
| rs497502    | 23 | 154513813 G  | 26 | 16 C | 0.0002858   |
| rs499428    | 23 | 154514047 G  | 26 | 16 A | 0.0002858   |
| rs504984    | 23 | 154514666 C  | 26 | 16 T | 0.0002858   |
| rs507127    | 23 | 154514919 G  | 26 | 16 A | 0.0002858   |
| rs513441    | 23 | 154515619 G  | 32 | 18 A | 0.000005019 |
| rs535869    | 23 | 154515705 T  | 26 | 16 C | 0.0002858   |
| rs572988    | 23 | 154517488 C  | 26 | 16 T | 0.0002858   |
| rs516396    | 23 | 154518759 C  | 26 | 16 T | 0.0002858   |
| rs519641    | 23 | 154519176 A  | 26 | 16 C | 0.0002858   |
| rs542899    | 23 | 154519309 T  | 26 | 16 A | 0.0002858   |
| rs4893113   | 23 | 154520877 T  | 32 | 18 C | 0.000005019 |
| rs782769    | 23 | 154521614 A  | 26 | 16 G | 0.0002858   |
| rs61166524  | 23 | 154521831 G  | 26 | 16 A | 0.0002858   |
| rs139939230 | 23 | 154521832 T  | 26 | 16 C | 0.0002858   |
| rs55700970  | 23 | 154521837 A  | 26 | 16 G | 0.0002858   |
| rs533001    | 23 | 154524691 T  | 26 | 16 C | 0.0002858   |
| rs201126787 | 23 | 154524753 GA | 26 | 16 G | 0.0002858   |
| rs3120729   | 23 | 154526428 A  | 26 | 16 T | 0.0002858   |
| rs1032821   | 23 | 154527474 G  | 26 | 16 C | 0.0002858   |
| rs139866562 | 23 | 154529407 T  | 26 | 16 C | 0.0002858   |
| rs201379772 | 23 | 154530885 A  | 26 | 16 C | 0.0001243   |
| rs199886570 | 23 | 154531631 A  | 25 | 16 G | 0.0005585   |
| rs200812781 | 23 | 154531843 C  | 26 | 16 G | 0.0003104   |
| rs201526230 | 23 | 154532369 A  | 24 | 16 G | 0.0005508   |
| rs200983321 | 23 | 154533450 G  | 24 | 14 T | 0.0002009   |
| rs5983838   | 23 | 154534628 T  | 26 | 16 C | 0.0002858   |
| rs1393999   | 23 | 154536274 T  | 26 | 16 G | 0.0002858   |
| rs12013168  | 23 | 154536836 T  | 26 | 16 C | 0.0002858   |
| rs513227    | 23 | 154539215 A  | 24 | 16 T | 0.0005508   |
| rs200876850 | 23 | 154539980 AG | 32 | 16 A | 0.000001499 |
| rs568396    | 23 | 154541603 G  | 26 | 16 C | 0.0002858   |
| rs506457    | 23 | 154542927 A  | 26 | 16 T | 0.0002858   |
| rs547724    | 23 | 154543125 G  | 32 | 18 T | 0.000005019 |
| rs529965    | 23 | 154546292 A  | 26 | 16 G | 0.0002858   |
| rs534490    | 23 | 154546764 A  | 26 | 16 G | 0.0002858   |
| rs481097    | 23 | 154550003 C  | 26 | 16 A | 0.0002858   |

|             |    |                        |    |                       |             |
|-------------|----|------------------------|----|-----------------------|-------------|
| rs537992    | 23 | 154550004 A            | 26 | 16 T                  | 0.0002858   |
| rs4320706   | 23 | 154550730 T            | 26 | 16 A                  | 0.0002858   |
| rs202190443 | 23 | 154553620 A            | 24 | 16 AAAAC              | 0.0005508   |
| rs7052359   | 23 | 154553751 C            | 32 | 18 T                  | 0.000005019 |
| rs541080    | 23 | 154554695 A            | 26 | 16 G                  | 0.0002858   |
| rs524609    | 23 | 154555595 G            | 26 | 16 T                  | 0.0002858   |
| rs495736    | 23 | 154557053 A            | 26 | 16 T                  | 0.0002858   |
| rs496740    | 23 | 154557160 G            | 32 | 18 A                  | 0.000005019 |
| rs5983764   | 23 | 154558908 C            | 26 | 16 T                  | 0.0002858   |
| rs200473316 | 23 | 154561955 TTAA         | 26 | 16 T                  | 0.0002858   |
| rs520145    | 23 | 154564940 C            | 26 | 16 G                  | 0.0002858   |
| rs28773194  | 23 | 154617179 C            | 32 | 18 T                  | 0.000005019 |
| rs28767831  | 23 | 154619181 A            | 26 | 16 G                  | 0.0003104   |
| rs4131734   | 23 | 154622229 C            | 32 | 18 T                  | 0.000005019 |
| rs59863310  | 23 | 154622257 AT           | 26 | 16 A                  | 0.0001017   |
| rs57535347  | 23 | 154622912 A            | 26 | 16 AAACAAAACCTTCAGGTG | 0.0003104   |
| rs28868976  | 23 | 154623878 A            | 26 | 16 G                  | 0.0002858   |
| rs28850951  | 23 | 154624809 T            | 26 | 16 C                  | 0.0002858   |
| rs369595430 | 23 | 154626197 TAAGATCAGGAA | 26 | 16 T                  | 0.0002858   |
| rs28867409  | 23 | 154628006 A            | 26 | 16 G                  | 0.0002858   |
| rs28852197  | 23 | 154628007 C            | 26 | 16 T                  | 0.0002858   |
| rs28769303  | 23 | 154634487 G            | 26 | 16 A                  | 0.0002858   |
| rs28676325  | 23 | 154634827 C            | 26 | 16 T                  | 0.0003104   |
| rs28855519  | 23 | 154635311 T            | 26 | 16 C                  | 0.0002858   |
| rs28788787  | 23 | 154635575 A            | 26 | 14 C                  | 0.000109    |
| rs28435674  | 23 | 154640027 T            | 26 | 16 A                  | 0.0002858   |
| rs28785918  | 23 | 154641200 T            | 26 | 16 G                  | 0.0002858   |
| rs28782601  | 23 | 154642141 C            | 26 | 16 T                  | 0.0002858   |
| rs28870179  | 23 | 154642144 A            | 26 | 16 C                  | 0.0002858   |
| rs28793417  | 23 | 154643832 A            | 26 | 16 G                  | 0.0002858   |
| rs28576503  | 23 | 154644493 T            | 26 | 16 C                  | 0.0002858   |
| rs28503175  | 23 | 154647114 A            | 32 | 18 C                  | 0.000005019 |
| rs28719866  | 23 | 154649082 A            | 26 | 16 C                  | 0.0002858   |
| rs28476526  | 23 | 154650337 A            | 33 | 18 G                  | 0.000002153 |
| rs143835791 | 23 | 154650909 A            | 26 | 16 AC                 | 0.0002858   |
| rs28376822  | 23 | 154651459 A            | 26 | 16 C                  | 0.0002858   |
| rs28461854  | 23 | 154651980 A            | 26 | 16 C                  | 0.0002858   |
| rs139968580 | 23 | 154652484 G            | 26 | 16 A                  | 0.0002858   |
| rs143869954 | 23 | 154652773 G            | 26 | 16 A                  | 0.0002858   |
| rs146843809 | 23 | 154653100 G            | 26 | 16 A                  | 0.0002858   |
| rs150609667 | 23 | 154653639 T            | 26 | 16 A                  | 0.0002858   |

|             |    |             |    |          |             |
|-------------|----|-------------|----|----------|-------------|
| rs139678244 | 23 | 154654004 C | 26 | 16 T     | 0.0003638   |
| rs146628589 | 23 | 154654218 T | 26 | 16 C     | 0.0003638   |
| rs141107998 | 23 | 154654719 T | 27 | 18 G     | 0.0004001   |
| rs77705284  | 23 | 154655375 C | 26 | 17 A     | 0.0003852   |
| rs74858147  | 23 | 154655663 G | 26 | 16 A     | 0.0002858   |
| rs145051005 | 23 | 154657022 A | 26 | 16 C     | 0.0002858   |
| rs113233836 | 23 | 154657311 C | 26 | 16 A     | 0.0002858   |
| rs61036919  | 23 | 154657762 T | 26 | 16 TATA  | 0.0003104   |
| rs28444648  | 23 | 154657902 A | 26 | 16 C     | 0.0002858   |
| rs28599172  | 23 | 154658213 T | 26 | 16 C     | 0.0002858   |
| rs28448813  | 23 | 154658332 C | 26 | 16 G     | 0.0002858   |
| rs28655495  | 23 | 154658415 A | 26 | 16 G     | 0.0002858   |
| rs28656912  | 23 | 154659587 C | 26 | 17 T     | 0.0003852   |
| rs28860618  | 23 | 154660311 G | 26 | 16 A     | 0.0002858   |
| rs146704646 | 23 | 154660744 G | 26 | 16 A     | 0.0002858   |
| rs141788318 | 23 | 154661259 C | 26 | 16 T     | 0.0002858   |
| rs150613854 | 23 | 154661565 G | 26 | 16 A     | 0.0002858   |
| rs140276121 | 23 | 154661793 A | 26 | 16 C     | 0.0002858   |
| rs79923209  | 23 | 154662136 C | 26 | 16 T     | 0.0002858   |
| rs28864804  | 23 | 154665095 G | 32 | 18 A     | 0.000005019 |
| rs28848797  | 23 | 154665337 C | 32 | 18 T     | 0.000005019 |
| rs28791527  | 23 | 154665890 G | 26 | 16 A     | 0.0002858   |
| rs28842206  | 23 | 154665968 G | 32 | 18 A     | 0.000005019 |
| rs28857192  | 23 | 154666533 A | 26 | 16 T     | 0.0002858   |
| rs28862095  | 23 | 154667475 C | 26 | 16 T     | 0.0002858   |
| rs28480480  | 23 | 154668066 T | 32 | 18 A     | 0.000005019 |
| rs28810503  | 23 | 154670873 A | 32 | 18 C     | 0.000005019 |
| rs111951856 | 23 | 154671407 T | 26 | 16 TACTC | 0.0002858   |
| rs28790957  | 23 | 154671432 T | 26 | 16 A     | 0.0002858   |
| rs28526133  | 23 | 154674697 G | 26 | 16 A     | 0.0002858   |
| rs111291840 | 23 | 154674731 G | 26 | 16 GA    | 0.0002858   |
| rs28880039  | 23 | 154678628 G | 32 | 19 C     | 0.00001307  |
| rs28873383  | 23 | 154678938 C | 26 | 16 T     | 0.0002858   |
| rs28811917  | 23 | 154679547 A | 26 | 17 T     | 0.0003852   |
| rs28805403  | 23 | 154680583 G | 26 | 16 A     | 0.0002858   |
| rs28769041  | 23 | 154680828 C | 26 | 16 T     | 0.0002858   |
| rs5940390   | 23 | 154681629 T | 26 | 16 A     | 0.0003104   |
| rs5940511   | 23 | 154682147 C | 26 | 16 A     | 0.0002858   |
| rs5940510   | 23 | 154683663 C | 28 | 19 T     | 0.0002695   |
| rs72616497  | 23 | 154696888 C | 26 | 16 T     | 0.0002858   |
| rs72616498  | 23 | 154696905 A | 26 | 16 G     | 0.0002858   |



|            |    |                 |    |                       |             |
|------------|----|-----------------|----|-----------------------|-------------|
| rs12557310 | 23 | 154735698 T     | 32 | 18 C                  | 0.000005019 |
| rs5940458  | 23 | 154736968 T     | 26 | 16 G                  | 0.0002858   |
| rs5940372  | 23 | 154737376 G     | 26 | 16 A                  | 0.0002858   |
| rs989711   | 23 | 154739500 A     | 26 | 16 T                  | 0.0002858   |
| rs79920288 | 23 | 154740179 T     | 26 | 16 C                  | 0.0002858   |
| rs76536573 | 23 | 154740180 G     | 33 | 18 A                  | 0.000002153 |
| rs5940460  | 23 | 154740429 A     | 26 | 18 G                  | 0.0007809   |
| rs6642272  | 23 | 154741935 A     | 26 | 16 C                  | 0.0002858   |
| rs5940463  | 23 | 154745067 T     | 26 | 16 A                  | 0.0002858   |
| rs5940464  | 23 | 154745451 G     | 26 | 16 T                  | 0.0002858   |
| rs1598123  | 23 | 154753286 C     | 26 | 16 G                  | 0.0002858   |
| rs5940465  | 23 | 154753903 A     | 32 | 18 G                  | 0.000005019 |
| rs56387516 | 23 | 154754455 T     | 32 | 18 C                  | 0.000005019 |
| rs2123894  | 23 | 154755253 T     | 26 | 16 A                  | 0.0002858   |
| rs57421488 | 23 | 154757994 ATTTT | 26 | 16 A                  | 0.0002858   |
| rs1840291  | 23 | 154758172 G     | 26 | 16 A                  | 0.0002858   |
| rs1454268  | 23 | 154758477 T     | 26 | 16 C                  | 0.0002858   |
| rs11270561 | 23 | 154760090 A     | 26 | 16 AGGGAGGAAATGGGAGAT | 0.0002858   |
| rs5940466  | 23 | 154763036 A     | 26 | 16 G                  | 0.0002858   |
| rs60233546 | 23 | 154763040 G     | 26 | 15 GCA                | 0.0001216   |
| rs5940467  | 23 | 154763368 G     | 26 | 16 A                  | 0.0002858   |
| rs5940468  | 23 | 154766596 A     | 26 | 16 C                  | 0.0002858   |
| rs5940469  | 23 | 154766772 C     | 26 | 16 G                  | 0.0002858   |
| rs1598126  | 23 | 154767486 A     | 26 | 16 C                  | 0.0002858   |
| rs1563178  | 23 | 154770290 A     | 26 | 16 T                  | 0.0002858   |
| rs4514170  | 23 | 154771641 C     | 26 | 16 T                  | 0.0003104   |
| rs2305517  | 23 | 154774663 G     | 32 | 18 A                  | 0.000005019 |
| rs2305518  | 23 | 154774707 C     | 26 | 16 T                  | 0.0002858   |
| rs5940478  | 23 | 154776197 G     | 26 | 16 A                  | 0.0002858   |
| rs5940376  | 23 | 154776510 G     | 26 | 16 A                  | 0.0002858   |
| rs5940479  | 23 | 154776644 T     | 26 | 16 C                  | 0.0002858   |
| rs5940480  | 23 | 154776650 A     | 32 | 18 G                  | 0.000005019 |
| rs5940484  | 23 | 154777564 C     | 26 | 16 A                  | 0.0002858   |
| rs5940485  | 23 | 154777919 A     | 26 | 16 G                  | 0.0002858   |
| rs5940486  | 23 | 154778123 A     | 26 | 16 G                  | 0.0002858   |
| rs5940487  | 23 | 154778278 C     | 24 | 16 T                  | 0.0009443   |
| rs5940381  | 23 | 154778352 T     | 31 | 18 C                  | 0.0000103   |
| rs6642286  | 23 | 154779570 C     | 26 | 16 G                  | 0.0002858   |
| rs12688786 | 23 | 154779966 T     | 32 | 17 A                  | 0.000001976 |
| rs6642287  | 23 | 154780283 A     | 32 | 17 C                  | 0.000001976 |
| rs5940488  | 23 | 154780734 A     | 26 | 16 T                  | 0.0002858   |

|             |    |              |    |      |             |
|-------------|----|--------------|----|------|-------------|
| rs5940489   | 23 | 154780920 A  | 26 | 16 G | 0.0002858   |
| rs6567762   | 23 | 154781700 G  | 26 | 16 C | 0.0002858   |
| rs5940490   | 23 | 154782661 C  | 26 | 16 T | 0.0002858   |
| rs5940491   | 23 | 154782766 C  | 26 | 16 T | 0.0002858   |
| rs2085080   | 23 | 154784641 T  | 26 | 16 C | 0.0003104   |
| rs2379272   | 23 | 154784846 C  | 26 | 16 T | 0.0002858   |
| rs72278264  | 23 | 154784848 TC | 26 | 16 T | 0.0002858   |
| rs5940392   | 23 | 154784873 A  | 26 | 16 C | 0.0002858   |
| rs2085081   | 23 | 154784876 G  | 26 | 16 T | 0.0002858   |
| rs2085082   | 23 | 154784971 C  | 26 | 16 G | 0.0003104   |
| rs6567763   | 23 | 154785091 G  | 26 | 16 C | 0.0003104   |
| rs6567764   | 23 | 154785167 T  | 26 | 16 C | 0.0003104   |
| rs5940519   | 23 | 154785672 A  | 27 | 18 G | 0.0004513   |
| rs5940521   | 23 | 154786106 G  | 32 | 18 A | 0.000005019 |
| rs6642226   | 23 | 154786213 C  | 26 | 16 G | 0.0002858   |
| rs6567765   | 23 | 154786302 G  | 26 | 16 C | 0.0002858   |
| rs6642292   | 23 | 154786702 C  | 32 | 18 T | 0.000005019 |
| rs6642293   | 23 | 154787056 C  | 26 | 16 T | 0.0002858   |
| rs5940512   | 23 | 154789183 G  | 32 | 18 A | 0.000005019 |
| rs5940513   | 23 | 154789496 A  | 26 | 16 G | 0.0002858   |
| rs5940526   | 23 | 154803793 T  | 32 | 18 A | 0.000005019 |
| rs5940397   | 23 | 154804301 G  | 26 | 16 A | 0.0002858   |
| rs12834147  | 23 | 154805102 G  | 26 | 16 C | 0.0002858   |
| rs2890132   | 23 | 154805911 G  | 26 | 16 A | 0.0002858   |
| rs371249305 | 23 | 154808856 TA | 26 | 16 T | 0.0002858   |
| rs1598125   | 23 | 154809205 T  | 26 | 16 C | 0.0002858   |
| rs139295015 | 23 | 154810792 T  | 32 | 18 C | 0.000005019 |
| rs140600574 | 23 | 154811177 C  | 26 | 16 T | 0.0002858   |
| rs142781423 | 23 | 154811232 T  | 26 | 16 C | 0.0003104   |
| rs1084453   | 23 | 154812237 C  | 26 | 16 T | 0.0002858   |
| rs1084452   | 23 | 154814147 C  | 26 | 14 T | 0.00009952  |
| rs1084451   | 23 | 154816439 A  | 26 | 16 C | 0.0002858   |
| rs1091848   | 23 | 154818314 C  | 26 | 16 T | 0.0003104   |
| rs782311    | 23 | 154819003 C  | 26 | 16 T | 0.0002858   |
| rs782310    | 23 | 154819368 T  | 26 | 16 C | 0.0002858   |
| rs1084450   | 23 | 154822874 A  | 26 | 16 T | 0.0002858   |
| rs782308    | 23 | 154825665 T  | 26 | 16 A | 0.0002858   |
| rs782307    | 23 | 154826161 G  | 32 | 18 C | 0.000005019 |
| rs782306    | 23 | 154826774 G  | 26 | 16 A | 0.0001017   |
| rs809138    | 23 | 154827160 T  | 26 | 16 C | 0.0002858   |
| rs5983745   | 23 | 154827280 T  | 26 | 16 C | 0.0002858   |

|             |    |                  |    |               |             |
|-------------|----|------------------|----|---------------|-------------|
| rs5983658   | 23 | 154830377 C      | 26 | 16 T          | 0.0002858   |
| rs5940539   | 23 | 154830650 A      | 32 | 18 C          | 0.000005019 |
| rs10782079  | 23 | 154830744 A      | 26 | 16 G          | 0.0002858   |
| rs522805    | 23 | 154839087 T      | 26 | 16 C          | 0.0002858   |
| rs89278     | 23 | 154842666 C      | 26 | 16 T          | 0.0002858   |
| rs479901    | 23 | 154844287 A      | 26 | 16 T          | 0.0002858   |
| rs476928    | 23 | 154844660 C      | 26 | 16 G          | 0.0002858   |
| rs561928    | 23 | 154845104 G      | 26 | 16 T          | 0.0002858   |
| rs498000    | 23 | 154846104 G      | 26 | 16 T          | 0.0002858   |
| rs580468    | 23 | 154846835 A      | 32 | 18 G          | 0.000005019 |
| rs574386    | 23 | 154847489 C      | 26 | 16 T          | 0.0002858   |
| rs146884178 | 23 | 154848759 T      | 26 | 16 TCTTAGAGCC | 0.0002858   |
| rs1834433   | 23 | 154849030 G      | 26 | 16 T          | 0.00005482  |
| rs672434    | 23 | 154850125 T      | 26 | 16 A          | 0.0002858   |
| rs569049    | 23 | 154850801 T      | 26 | 16 C          | 0.0002858   |
| rs561841    | 23 | 154851523 G      | 26 | 16 A          | 0.0002858   |
| rs75097820  | 23 | 154855606 T      | 26 | 16 TTA        | 0.0002858   |
| rs654274    | 23 | 154856281 A      | 26 | 16 G          | 0.0002858   |
| rs666267    | 23 | 154856709 C      | 26 | 16 G          | 0.0002858   |
| rs666344    | 23 | 154856764 A      | 26 | 16 C          | 0.0002858   |
| rs573685    | 23 | 154856774 T      | 26 | 16 A          | 0.0002858   |
| rs514136    | 23 | 154858649 C      | 24 | 16 T          | 0.0005508   |
| rs513234    | 23 | 154858725 T      | 26 | 16 C          | 0.0002858   |
| rs622211    | 23 | 154860283 A      | 26 | 16 G          | 0.0002858   |
| rs487307    | 23 | 154865855 A      | 26 | 16 G          | 0.0002858   |
| rs601290    | 23 | 154865915 G      | 26 | 16 A          | 0.0002858   |
| rs473772    | 23 | 154870197 T      | 26 | 16 C          | 0.0002858   |
| rs528286    | 23 | 154871743 C      | 27 | 16 T          | 0.0001457   |
| rs612412    | 23 | 154872707 G      | 26 | 16 A          | 0.0002858   |
| rs613783    | 23 | 154873044 C      | 32 | 18 A          | 0.000005019 |
| rs642362    | 23 | 154874837 A      | 26 | 16 G          | 0.0002858   |
| rs372034665 | 23 | 154875192 GTACTC | 26 | 16 G          | 0.0002858   |
| rs150712976 | 23 | 154879115 A      | 26 | 16 G          | 0.0002858   |
| rs491661    | 23 | 154880669 T      | 24 | 16 A          | 0.0005508   |
| rs494282    | 23 | 154880917 C      | 26 | 16 T          | 0.0002858   |
| rs520792    | 23 | 154881521 G      | 32 | 18 A          | 0.000005019 |
| rs563690    | 23 | 154885405 G      | 26 | 16 A          | 0.0002858   |
| rs608695    | 23 | 154885878 A      | 26 | 16 G          | 0.0002858   |
| rs610828    | 23 | 154886333 A      | 26 | 16 G          | 0.0002858   |
| rs512918    | 23 | 154887308 G      | 32 | 18 A          | 0.000005019 |
| rs636742    | 23 | 154887583 C      | 26 | 16 T          | 0.0002858   |

|             |    |              |    |        |             |
|-------------|----|--------------|----|--------|-------------|
| rs638156    | 23 | 154887924 T  | 26 | 16 A   | 0.0002858   |
| rs547437    | 23 | 154888722 G  | 26 | 16 A   | 0.0002858   |
| rs671588    | 23 | 154889423 C  | 26 | 16 T   | 0.0002858   |
| rs526172    | 23 | 154891554 G  | 26 | 16 T   | 0.0002858   |
| rs553678    | 23 | 154892230 A  | 26 | 16 G   | 0.0003104   |
| rs513900    | 23 | 154893980 C  | 26 | 16 T   | 0.0002858   |
| rs637652    | 23 | 154894353 A  | 26 | 16 C   | 0.0002858   |
| rs34440537  | 23 | 154897693 TA | 26 | 16 T   | 0.0002858   |
| rs586843    | 23 | 154897868 G  | 26 | 16 A   | 0.0002858   |
| rs549327    | 23 | 154898403 C  | 32 | 18 A   | 0.000005019 |
| rs473491    | 23 | 154899846 A  | 32 | 18 G   | 0.000005019 |
| rs628761    | 23 | 154900717 C  | 26 | 16 A   | 0.0002858   |
| rs627797    | 23 | 154900976 C  | 32 | 18 G   | 0.000005019 |
| rs697727    | 23 | 154901936 A  | 26 | 16 G   | 0.0002858   |
| rs696316    | 23 | 154902105 G  | 26 | 16 T   | 0.0002858   |
| rs697725    | 23 | 154902889 A  | 26 | 16 T   | 0.0003104   |
| rs479770    | 23 | 154903118 G  | 26 | 16 A   | 0.0002858   |
| rs480725    | 23 | 154903224 A  | 26 | 16 T   | 0.0002858   |
| rs674707    | 23 | 154903937 G  | 26 | 16 A   | 0.0002858   |
| rs488777    | 23 | 154906905 T  | 26 | 16 C   | 0.0002858   |
| rs601837    | 23 | 154908749 C  | 26 | 16 G   | 0.0002858   |
| rs473529    | 23 | 154909055 G  | 32 | 21 C   | 0.00003887  |
| rs586454    | 23 | 154909877 T  | 25 | 13 G   | 0.0000842   |
| rs622581    | 23 | 154913799 C  | 26 | 16 T   | 0.0003104   |
| rs35543589  | 23 | 154915433 C  | 26 | 14 CT  | 0.00009952  |
| rs571421    | 23 | 154915619 A  | 24 | 16 G   | 0.0005508   |
| rs672932    | 23 | 154915975 A  | 26 | 16 G   | 0.0002858   |
| rs669237    | 23 | 154916845 T  | 26 | 16 G   | 0.0002858   |
| rs642043    | 23 | 154918266 T  | 32 | 21 C   | 0.00003887  |
| rs509981    | 23 | 154925045 T  | 26 | 16 C   | 0.0002858   |
| rs538470    | 23 | 154925895 T  | 26 | 16 C   | 0.0002858   |
| rs645904    | 23 | 154927199 T  | 26 | 16 C   | 0.0002858   |
| rs644138    | 23 | 154927581 A  | 32 | 21 G   | 0.00003887  |
| rs557132    | 23 | 154929412 T  | 26 | 16 C   | 0.0002858   |
| rs4012982   | 23 | 154929952 C  | 25 | 16 CAA | 0.0005585   |
| rs781880    | 23 | 154930230 G  | 22 | 12 A   | 0.0002081   |
| X:154981605 | 23 | 154981605 A  | 15 | 4 T    | 0.0001557   |
| X:155255914 | 23 | 155255914 C  | 9  | 1 G    | 0.0007194   |

**Supplementary Table 3.** All nominally significant ( $p \leq 0.001$ ) genetic variants (SNVs/INDELS) for thrombocytopenia as determined by Fisher's exact test.

| rsID        | Chromosome | Position | Minor allele | Minor allele frequency among cases | Minor allele frequency among controls | Major allele | p-value   |
|-------------|------------|----------|--------------|------------------------------------|---------------------------------------|--------------|-----------|
| rs146451123 | 1          | 4075519  | C            | 29                                 | 7                                     | CT           | 0.0001081 |
| rs7514522   | 1          | 4752088  | G            | 3                                  | 17                                    | C            | 0.0005045 |
| rs35923204  | 1          | 4766739  | T            | 19                                 | 3                                     | C            | 0.0005082 |
| rs4654593   | 1          | 4769825  | T            | 21                                 | 4                                     | G            | 0.0008104 |
| rs12760917  | 1          | 4770065  | C            | 43                                 | 18                                    | T            | 0.0003905 |
| rs1061968   | 1          | 4772053  | C            | 44                                 | 18                                    | T            | 0.0002208 |
| rs17345600  | 1          | 4999073  | A            | 26                                 | 7                                     | C            | 0.0007902 |
| rs10915295  | 1          | 5001488  | G            | 29                                 | 9                                     | T            | 0.0008145 |
| rs79342656  | 1          | 7035983  | T            | 0                                  | 9                                     | C            | 0.0009641 |
| rs75077858  | 1          | 7037163  | A            | 0                                  | 9                                     | G            | 0.0009641 |
| rs201655284 | 1          | 7044684  | T            | 0                                  | 9                                     | TACTC        | 0.0009641 |
| rs11589210  | 1          | 7072945  | T            | 0                                  | 9                                     | C            | 0.0009641 |
| rs142745042 | 1          | 11438910 | C            | 0                                  | 10                                    | T            | 0.0004292 |
| rs637299    | 1          | 12219861 | G            | 52                                 | 26                                    | C            | 0.0005884 |
| rs816060    | 1          | 12219910 | G            | 52                                 | 26                                    | A            | 0.0005884 |
| rs1212890   | 1          | 12220369 | A            | 30                                 | 49                                    | G            | 0.0005383 |
| rs622839    | 1          | 12220797 | C            | 52                                 | 26                                    | G            | 0.0005884 |
| rs621938    | 1          | 12221026 | T            | 52                                 | 26                                    | C            | 0.0005884 |
| rs150885757 | 1          | 12221069 | CA           | 46                                 | 22                                    | C            | 0.0002256 |
| rs534146    | 1          | 12221606 | G            | 52                                 | 26                                    | A            | 0.0005884 |
| rs3830763   | 1          | 14142002 | AC           | 40                                 | 14                                    | A            | 0.0001172 |
| rs1810474   | 1          | 14145914 | A            | 23                                 | 5                                     | G            | 0.0006807 |
| rs2744681   | 1          | 14149396 | G            | 23                                 | 5                                     | A            | 0.0006807 |
| rs2697970   | 1          | 14149505 | C            | 23                                 | 5                                     | A            | 0.0006807 |
| rs2697969   | 1          | 14149601 | C            | 23                                 | 5                                     | T            | 0.0006807 |
| rs2697968   | 1          | 14149622 | T            | 23                                 | 5                                     | C            | 0.0006807 |
| rs1046333   | 1          | 14149844 | T            | 23                                 | 5                                     | A            | 0.0006807 |
| rs2697966   | 1          | 14150116 | C            | 23                                 | 5                                     | T            | 0.0006807 |
| rs2697965   | 1          | 14150505 | T            | 23                                 | 5                                     | C            | 0.0006807 |
| rs2744677   | 1          | 14154723 | G            | 27                                 | 6                                     | T            | 0.0001606 |
| rs149580705 | 1          | 14154806 | A            | 26                                 | 6                                     | AGTAACTTACCT | 0.0003002 |
| rs2697983   | 1          | 14157577 | A            | 26                                 | 6                                     | G            | 0.0003002 |
| rs932369    | 1          | 14161921 | T            | 23                                 | 5                                     | A            | 0.0006807 |
| rs1203690   | 1          | 14162023 | T            | 23                                 | 5                                     | G            | 0.0006807 |
| rs1203686   | 1          | 14163428 | A            | 21                                 | 4                                     | G            | 0.0008104 |
| rs68184904  | 1          | 14165191 | G            | 25                                 | 6                                     | C            | 0.000538  |
| rs849609    | 1          | 16924589 | A            | 35                                 | 12                                    | G            | 0.0004754 |
| rs2935931   | 1          | 17500227 | T            | 45                                 | 20                                    | A            | 0.0007326 |
| rs2977255   | 1          | 17501651 | C            | 45                                 | 20                                    | T            | 0.0007326 |

|             |   |             |    |        |           |
|-------------|---|-------------|----|--------|-----------|
| rs3003452   | 1 | 17501720 C  | 45 | 20 G   | 0.0007326 |
| rs35354876  | 1 | 17501814 CA | 45 | 20 C   | 0.0007326 |
| rs2977258   | 1 | 17501898 A  | 45 | 20 G   | 0.0007326 |
| rs2935934   | 1 | 17502941 G  | 45 | 20 A   | 0.0007326 |
| rs2935935   | 1 | 17502942 G  | 45 | 20 A   | 0.0007326 |
| rs7529982   | 1 | 17503117 A  | 45 | 20 T   | 0.0007326 |
| rs2977265   | 1 | 17503210 A  | 45 | 20 G   | 0.0007326 |
| rs35497865  | 1 | 17504802 AT | 45 | 20 A   | 0.0007326 |
| rs2977276   | 1 | 17504846 A  | 45 | 20 T   | 0.0007326 |
| rs2935921   | 1 | 17511243 A  | 45 | 20 G   | 0.0007326 |
| rs2977247   | 1 | 17515804 T  | 45 | 20 C   | 0.0007326 |
| rs2935942   | 1 | 17517255 C  | 45 | 20 T   | 0.0007326 |
| rs3104441   | 1 | 17517831 C  | 45 | 20 A   | 0.0007326 |
| rs3123530   | 1 | 17517833 A  | 45 | 20 T   | 0.0007326 |
| rs370567292 | 1 | 22547086 A  | 0  | 10 G   | 0.0004292 |
| rs72662681  | 1 | 26112371 A  | 0  | 9 G    | 0.0009641 |
| 1:33682038  | 1 | 33682038 C  | 0  | 9 T    | 0.0009641 |
| rs17465854  | 1 | 33687320 C  | 0  | 9 T    | 0.0009641 |
| rs72656286  | 1 | 33719199 G  | 0  | 9 T    | 0.0009641 |
| rs143567912 | 1 | 34140788 G  | 2  | 14 T   | 0.0009649 |
| rs1203148   | 1 | 35968899 G  | 9  | 30 A   | 0.0003688 |
| rs1203147   | 1 | 35969652 C  | 9  | 25 A   | 0.0008322 |
| rs6668196   | 1 | 36069204 G  | 1  | 12 A   | 0.0007887 |
| rs6658272   | 1 | 38472841 T  | 26 | 7 C    | 0.0007902 |
| 1:40648426  | 1 | 40648426 C  | 0  | 10 T   | 0.0003596 |
| rs61768443  | 1 | 44279579 G  | 54 | 28 A   | 0.0009655 |
| rs147285662 | 1 | 53476248 A  | 0  | 10 AAT | 0.0004292 |
| rs200971546 | 1 | 53601827 C  | 4  | 23 A   | 0.0001525 |
| rs143756558 | 1 | 54954041 CG | 0  | 9 C    | 0.0009641 |
| rs35361720  | 1 | 57526515 A  | 28 | 8 AT   | 0.0006092 |
| rs17114917  | 1 | 57529790 A  | 29 | 9 G    | 0.0008145 |
| rs35512026  | 1 | 57530093 T  | 29 | 9 C    | 0.0008145 |
| rs7529536   | 1 | 57531021 A  | 29 | 9 G    | 0.0008145 |
| rs11308788  | 1 | 57531622 C  | 29 | 9 CT   | 0.0008145 |
| rs79534351  | 1 | 58501725 G  | 2  | 15 A   | 0.0004755 |
| rs12122973  | 1 | 62642252 G  | 35 | 13 C   | 0.000996  |
| rs4468199   | 1 | 65893960 G  | 1  | 12 A   | 0.0007887 |
| rs75465244  | 1 | 65894940 G  | 1  | 12 A   | 0.0007887 |
| rs1887285   | 1 | 65897747 G  | 1  | 12 A   | 0.0007887 |
| rs77223187  | 1 | 65909606 G  | 1  | 12 A   | 0.0007887 |
| rs74501836  | 1 | 76625210 G  | 2  | 14 A   | 0.0009649 |

|             |   |             |    |       |           |
|-------------|---|-------------|----|-------|-----------|
| rs76783328  | 1 | 76773440 G  | 0  | 11 T  | 0.0001895 |
| rs12117719  | 1 | 79111194 T  | 25 | 6 C   | 0.0005533 |
| 1:83950538  | 1 | 83950538 C  | 26 | 7 G   | 0.0007902 |
| rs4907075   | 1 | 84926639 G  | 4  | 19 A  | 0.0004818 |
| rs9432839   | 1 | 84927162 T  | 4  | 19 C  | 0.0004818 |
| rs7546947   | 1 | 85047535 T  | 4  | 18 G  | 0.0009242 |
| rs72950380  | 1 | 85048148 A  | 4  | 18 C  | 0.0009242 |
| rs12144566  | 1 | 87698441 A  | 32 | 51 C  | 0.0003437 |
| rs138048727 | 1 | 87827916 G  | 4  | 20 GA | 0.0001364 |
| rs17129984  | 1 | 87828033 A  | 5  | 20 G  | 0.0004383 |
| rs12138109  | 1 | 87839828 A  | 1  | 12 G  | 0.0007887 |
| rs115448241 | 1 | 87842327 G  | 1  | 12 A  | 0.0007887 |
| rs113509141 | 1 | 87844556 T  | 1  | 12 C  | 0.0007887 |
| rs10518386  | 1 | 87847161 A  | 1  | 12 G  | 0.0007887 |
| rs79251904  | 1 | 87848315 G  | 1  | 12 A  | 0.0007887 |
| rs753231    | 1 | 87849684 C  | 2  | 14 G  | 0.0009649 |
| rs76933147  | 1 | 87851606 C  | 1  | 12 A  | 0.0007887 |
| rs75287360  | 1 | 87852689 A  | 1  | 12 G  | 0.0007887 |
| rs76301958  | 1 | 87852723 G  | 1  | 12 T  | 0.0007887 |
| rs75830465  | 1 | 87853862 T  | 1  | 12 C  | 0.0007887 |
| rs12026304  | 1 | 87854121 A  | 2  | 14 T  | 0.0009649 |
| rs11161998  | 1 | 87854436 G  | 2  | 14 A  | 0.0009649 |
| rs113364398 | 1 | 87855351 T  | 1  | 12 C  | 0.0007887 |
| rs12127125  | 1 | 87856069 G  | 1  | 12 A  | 0.0007887 |
| rs11161999  | 1 | 87856133 A  | 2  | 14 G  | 0.0009649 |
| rs12127255  | 1 | 87856501 G  | 1  | 12 A  | 0.0007887 |
| rs79250690  | 1 | 87858551 A  | 1  | 12 T  | 0.0007887 |
| rs370234031 | 1 | 87859619 A  | 1  | 12 AT | 0.0007887 |
| rs4500347   | 1 | 107083242 T | 4  | 19 C  | 0.0004818 |
| rs11184922  | 1 | 107106193 C | 4  | 19 T  | 0.0004818 |
| rs76529689  | 1 | 107109479 C | 16 | 2 T   | 0.0008956 |
| rs4573547   | 1 | 107140440 A | 4  | 19 T  | 0.0004818 |
| rs10430081  | 1 | 107179756 G | 3  | 16 A  | 0.0009912 |
| rs200827562 | 1 | 107184638 A | 3  | 16 G  | 0.0005264 |
| rs7527883   | 1 | 107200907 T | 5  | 19 A  | 0.0008415 |
| rs12065128  | 1 | 107201593 T | 5  | 19 G  | 0.0008415 |
| rs7515817   | 1 | 107204738 A | 5  | 19 G  | 0.0008415 |
| rs12060904  | 1 | 107206300 G | 5  | 19 T  | 0.0008415 |
| rs55885362  | 1 | 107206882 A | 5  | 19 C  | 0.0008415 |
| rs72982130  | 1 | 107207111 T | 5  | 19 C  | 0.0008415 |
| rs12066188  | 1 | 107207603 A | 5  | 19 G  | 0.0008415 |

|             |   |              |    |       |           |
|-------------|---|--------------|----|-------|-----------|
| rs12077984  | 1 | 107208268 G  | 5  | 19 C  | 0.0008415 |
| rs12062790  | 1 | 107208406 G  | 5  | 19 A  | 0.0008415 |
| rs113588885 | 1 | 107208439 C  | 5  | 19 T  | 0.0008415 |
| rs12063902  | 1 | 107208466 C  | 5  | 19 T  | 0.0008415 |
| rs147299481 | 1 | 107208818 GA | 5  | 19 G  | 0.0008415 |
| rs12079433  | 1 | 107209364 T  | 5  | 19 C  | 0.0008415 |
| rs72982138  | 1 | 107211035 A  | 5  | 19 T  | 0.0008415 |
| rs112539959 | 1 | 107211704 T  | 5  | 19 C  | 0.0008415 |
| rs80211416  | 1 | 107212319 T  | 5  | 19 G  | 0.0008415 |
| rs12074685  | 1 | 107213259 T  | 5  | 19 G  | 0.0008415 |
| rs72982144  | 1 | 107213759 A  | 5  | 19 G  | 0.0008415 |
| rs12066688  | 1 | 107216073 G  | 5  | 19 A  | 0.0008415 |
| rs72982148  | 1 | 107216419 C  | 5  | 19 A  | 0.0008415 |
| rs11184960  | 1 | 107216719 C  | 5  | 19 A  | 0.0008415 |
| rs56377258  | 1 | 107217276 A  | 5  | 19 G  | 0.0008415 |
| rs72982150  | 1 | 107218105 G  | 5  | 19 A  | 0.0008415 |
| rs6692251   | 1 | 107221859 G  | 5  | 19 A  | 0.0008415 |
| rs12409401  | 1 | 107222522 T  | 5  | 19 C  | 0.0008415 |
| rs41346254  | 1 | 107223280 C  | 5  | 19 T  | 0.0008415 |
| rs72982166  | 1 | 107223588 A  | 5  | 19 C  | 0.0008415 |
| rs4323743   | 1 | 107224678 C  | 5  | 19 T  | 0.0008415 |
| rs4311915   | 1 | 107225176 C  | 5  | 19 T  | 0.0008415 |
| rs72982173  | 1 | 107225472 T  | 5  | 19 C  | 0.0008415 |
| rs4338391   | 1 | 107226805 A  | 5  | 19 T  | 0.0008415 |
| rs17017407  | 1 | 107229999 C  | 5  | 19 A  | 0.0008415 |
| rs59494924  | 1 | 107230598 A  | 5  | 19 G  | 0.0008415 |
| rs72982182  | 1 | 107237310 T  | 5  | 19 G  | 0.0008415 |
| rs141209417 | 1 | 107238006 T  | 5  | 19 TC | 0.0008415 |
| rs201979451 | 1 | 107238009 T  | 5  | 19 A  | 0.0008415 |
| rs72982185  | 1 | 107240633 G  | 5  | 19 A  | 0.0008415 |
| rs78413118  | 1 | 107241996 T  | 5  | 19 C  | 0.0008415 |
| rs72982195  | 1 | 107250118 A  | 5  | 19 G  | 0.0008415 |
| rs72984005  | 1 | 107252855 A  | 5  | 19 G  | 0.0008415 |
| rs4614293   | 1 | 107256357 T  | 5  | 19 C  | 0.0008415 |
| rs4424539   | 1 | 107256600 A  | 5  | 19 G  | 0.0008415 |
| rs17017475  | 1 | 107259785 A  | 5  | 19 G  | 0.0008415 |
| rs12124701  | 1 | 107358226 A  | 7  | 22 G  | 0.0009169 |
| rs17482072  | 1 | 115912328 A  | 48 | 23 G  | 0.0008881 |
| rs17541389  | 1 | 115916854 C  | 48 | 23 G  | 0.0008881 |
| rs17541465  | 1 | 115918184 C  | 48 | 23 A  | 0.0008881 |
| 1:142909136 | 1 | 142909136 T  | 0  | 11 C  | 0.0001895 |



|             |   |                   |    |       |           |
|-------------|---|-------------------|----|-------|-----------|
| rs79597374  | 1 | 143275511 T       | 0  | 9 A   | 0.0009641 |
| rs182686243 | 1 | 149034849 G       | 4  | 22 T  | 0.0003217 |
| 1:149458249 | 1 | 149458249 T       | 0  | 9 C   | 0.000946  |
| rs116753436 | 1 | 151258314 C       | 2  | 16 T  | 0.0002312 |
| rs11581057  | 1 | 156991688 C       | 23 | 4 T   | 0.0002248 |
| rs11584902  | 1 | 157001597 C       | 23 | 4 G   | 0.0002248 |
| rs34314027  | 1 | 157003864 C       | 23 | 4 T   | 0.0002248 |
| 1:157016023 | 1 | 157016023 GCCGCCA | 22 | 3 G   | 0.0001254 |
| rs150800619 | 1 | 157025409 CT      | 23 | 4 C   | 0.0002248 |
| rs11577418  | 1 | 157026971 A       | 23 | 4 G   | 0.0002248 |
| rs11576099  | 1 | 157027002 C       | 23 | 4 T   | 0.0002248 |
| rs11576100  | 1 | 157027028 C       | 23 | 4 T   | 0.0002248 |
| rs71593876  | 1 | 157027179 C       | 23 | 4 CT  | 0.0002248 |
| rs35631733  | 1 | 157027288 T       | 23 | 4 TAA | 0.0002248 |
| rs11581893  | 1 | 157027520 T       | 23 | 4 C   | 0.0002248 |
| rs35756545  | 1 | 157027944 T       | 23 | 4 C   | 0.0002248 |
| rs12745721  | 1 | 157028212 T       | 23 | 4 G   | 0.0002248 |
| rs34160895  | 1 | 157028313 A       | 21 | 4 AG  | 0.0004214 |
| rs11582411  | 1 | 157028335 T       | 23 | 4 C   | 0.0002248 |
| rs11577087  | 1 | 157028388 C       | 24 | 4 T   | 0.0001159 |
| rs11578403  | 1 | 157028389 A       | 24 | 4 G   | 0.0001159 |
| rs11578421  | 1 | 157028531 A       | 23 | 4 G   | 0.0002248 |
| rs11577133  | 1 | 157028744 G       | 22 | 4 T   | 0.00043   |
| rs11582484  | 1 | 157028809 A       | 23 | 4 C   | 0.0002248 |
| rs866605    | 1 | 157028990 T       | 23 | 4 C   | 0.0002248 |
| rs61326781  | 1 | 157029134 C       | 23 | 4 T   | 0.0002248 |
| rs11577688  | 1 | 157029857 C       | 23 | 4 T   | 0.0002248 |
| rs61329932  | 1 | 157030077 A       | 23 | 4 T   | 0.0002248 |
| rs58824481  | 1 | 157030082 T       | 23 | 4 C   | 0.0002248 |
| rs59571768  | 1 | 157030099 A       | 23 | 4 G   | 0.0002248 |
| rs1706      | 1 | 157030280 C       | 23 | 4 T   | 0.0002248 |
| rs11590493  | 1 | 157030627 C       | 22 | 4 T   | 0.00043   |
| rs35256778  | 1 | 157031010 A       | 23 | 4 G   | 0.0002248 |
| rs34994593  | 1 | 157031017 G       | 23 | 4 A   | 0.0002248 |
| rs35045427  | 1 | 157031055 G       | 23 | 4 T   | 0.0002248 |
| rs34230711  | 1 | 157031435 A       | 23 | 4 G   | 0.0002248 |
| rs12735183  | 1 | 157031591 T       | 23 | 4 C   | 0.0002248 |
| rs12759104  | 1 | 157031622 C       | 23 | 4 T   | 0.0002248 |
| rs12734005  | 1 | 157031623 C       | 23 | 4 G   | 0.0002248 |
| rs12759254  | 1 | 157031678 C       | 23 | 4 T   | 0.0002248 |
| rs35209965  | 1 | 157031969 C       | 23 | 4 CT  | 0.0002248 |

|             |   |              |    |      |           |
|-------------|---|--------------|----|------|-----------|
| rs12759732  | 1 | 157032001 C  | 23 | 4 T  | 0.0002248 |
| rs35418037  | 1 | 157032593 A  | 23 | 4 G  | 0.0002248 |
| rs59149386  | 1 | 157032706 T  | 23 | 4 C  | 0.0002248 |
| rs34609359  | 1 | 157032832 C  | 23 | 4 T  | 0.0002248 |
| rs34971986  | 1 | 157032883 G  | 23 | 4 A  | 0.0002248 |
| rs11581819  | 1 | 157032995 T  | 23 | 4 C  | 0.0002248 |
| rs11577808  | 1 | 157033027 A  | 23 | 4 G  | 0.0002248 |
| rs11576914  | 1 | 157033294 A  | 23 | 4 T  | 0.0002248 |
| rs11576533  | 1 | 157033505 G  | 23 | 4 A  | 0.0002248 |
| rs35275017  | 1 | 157033610 C  | 24 | 4 CT | 0.0001159 |
| rs12731416  | 1 | 157033664 C  | 23 | 4 T  | 0.0002248 |
| rs67062038  | 1 | 157033901 G  | 23 | 4 A  | 0.0002248 |
| rs67278038  | 1 | 157033919 A  | 23 | 4 G  | 0.0002248 |
| rs35025242  | 1 | 157033971 AT | 22 | 4 A  | 0.00043   |
| rs34177345  | 1 | 157034213 A  | 23 | 4 G  | 0.0002248 |
| rs34065145  | 1 | 157034246 C  | 23 | 4 T  | 0.0002248 |
| rs34438489  | 1 | 157034325 C  | 23 | 4 T  | 0.0002248 |
| rs11582800  | 1 | 157034471 T  | 23 | 4 C  | 0.0002248 |
| rs11577472  | 1 | 157034503 A  | 23 | 4 T  | 0.0002248 |
| rs35043156  | 1 | 157034715 G  | 23 | 4 A  | 0.0002248 |
| rs138311748 | 1 | 157035303 T  | 23 | 4 C  | 0.0002248 |
| rs115482314 | 1 | 157035522 G  | 23 | 4 C  | 0.0002248 |
| rs146206625 | 1 | 157035548 A  | 23 | 4 C  | 0.0002248 |
| rs144424473 | 1 | 157035772 C  | 23 | 4 T  | 0.0002248 |
| rs12743010  | 1 | 157036195 G  | 23 | 4 A  | 0.0002248 |
| rs34047481  | 1 | 157036233 CA | 23 | 4 C  | 0.0002248 |
| rs12760516  | 1 | 157036266 T  | 23 | 4 G  | 0.0002248 |
| rs12747244  | 1 | 157036322 C  | 23 | 4 T  | 0.0002248 |
| rs12747418  | 1 | 157036424 A  | 23 | 4 T  | 0.0002248 |
| rs71593878  | 1 | 157036573 C  | 23 | 4 CT | 0.0002248 |
| rs66524118  | 1 | 157036657 T  | 23 | 4 C  | 0.0002248 |
| rs67992922  | 1 | 157036686 C  | 23 | 4 T  | 0.0002248 |
| rs67871969  | 1 | 157036870 G  | 23 | 4 A  | 0.0002248 |
| rs35310943  | 1 | 157036956 C  | 23 | 4 G  | 0.0002248 |
| rs34330037  | 1 | 157036971 T  | 23 | 4 C  | 0.0002248 |
| rs34951264  | 1 | 157037242 C  | 23 | 4 G  | 0.0002248 |
| rs35958339  | 1 | 157037270 A  | 23 | 4 AT | 0.0002248 |
| rs60784227  | 1 | 157037779 G  | 23 | 4 T  | 0.0002248 |
| rs57543447  | 1 | 157037957 G  | 23 | 4 A  | 0.0002248 |
| rs61407874  | 1 | 157038008 G  | 23 | 4 A  | 0.0002248 |
| rs12728942  | 1 | 157038163 C  | 23 | 4 G  | 0.0002248 |

|             |   |                         |    |      |            |
|-------------|---|-------------------------|----|------|------------|
| rs12753932  | 1 | 157038227 G             | 23 | 4 A  | 0.0002248  |
| rs12758039  | 1 | 157038250 G             | 23 | 4 T  | 0.0002248  |
| rs36051715  | 1 | 157038624 C             | 23 | 4 G  | 0.0002248  |
| rs12759047  | 1 | 157038865 G             | 23 | 4 T  | 0.0002248  |
| rs12759364  | 1 | 157038997 C             | 23 | 4 T  | 0.0002248  |
| rs12759394  | 1 | 157039061 C             | 23 | 4 T  | 0.0002248  |
| rs12755356  | 1 | 157039073 G             | 23 | 4 A  | 0.0002248  |
| rs12725372  | 1 | 157039400 C             | 23 | 4 T  | 0.0002248  |
| rs12725382  | 1 | 157039437 C             | 23 | 4 T  | 0.0002248  |
| rs12739927  | 1 | 157039462 A             | 23 | 4 C  | 0.0002248  |
| rs12739240  | 1 | 157039741 A             | 23 | 4 G  | 0.0002248  |
| rs35904515  | 1 | 157040203 A             | 23 | 4 G  | 0.0002248  |
| rs34909260  | 1 | 157040296 G             | 23 | 4 A  | 0.0002248  |
| rs12755131  | 1 | 157040527 G             | 23 | 4 C  | 0.0002248  |
| rs12740642  | 1 | 157040552 C             | 23 | 4 T  | 0.0002248  |
| rs12741140  | 1 | 157040837 C             | 23 | 4 T  | 0.0002248  |
| rs12755959  | 1 | 157041010 T             | 23 | 4 C  | 0.0002248  |
| rs12737408  | 1 | 157041078 G             | 23 | 4 A  | 0.0002248  |
| rs12756141  | 1 | 157041107 T             | 23 | 4 C  | 0.0002248  |
| rs12760052  | 1 | 157041181 G             | 23 | 4 C  | 0.0002248  |
| rs12760229  | 1 | 157041302 T             | 23 | 4 C  | 0.0002248  |
| rs56801406  | 1 | 157044993 G             | 26 | 5 C  | 0.0001012  |
| rs59462822  | 1 | 157045213 A             | 26 | 5 G  | 0.0001012  |
| rs35188764  | 1 | 157046198 G             | 23 | 3 A  | 0.00006268 |
| rs36032506  | 1 | 157046248 T             | 23 | 4 C  | 0.0002248  |
| rs34074614  | 1 | 157047366 C             | 23 | 4 T  | 0.0002248  |
| rs11587380  | 1 | 157048220 G             | 26 | 5 C  | 0.0001012  |
| rs11587404  | 1 | 157048354 T             | 23 | 4 C  | 0.0002248  |
| rs34961273  | 1 | 157050194 G             | 23 | 4 A  | 0.0002248  |
| rs12752535  | 1 | 157050368 T             | 23 | 4 G  | 0.0002248  |
| rs11578226  | 1 | 157051348 C             | 26 | 5 T  | 0.0001012  |
| rs34328576  | 1 | 157051761 CCCT          | 23 | 4 C  | 0.0002248  |
| rs149171885 | 1 | 157052071 TCAGTTTGGCATT | 26 | 5 T  | 0.0001012  |
| rs34414479  | 1 | 157052224 A             | 26 | 5 G  | 0.0001012  |
| rs34369222  | 1 | 157052352 G             | 23 | 4 A  | 0.0002248  |
| rs35090422  | 1 | 157052784 G             | 23 | 4 GA | 0.0002248  |
| rs34542108  | 1 | 157052794 T             | 23 | 4 C  | 0.0002248  |
| rs11580245  | 1 | 157052987 A             | 23 | 4 G  | 0.0002248  |
| rs35043649  | 1 | 157053226 ATT           | 23 | 4 A  | 0.0002248  |
| rs1176561   | 1 | 157053342 T             | 23 | 3 C  | 0.00006268 |
| rs12080191  | 1 | 157053415 T             | 23 | 4 C  | 0.0002248  |

|             |   |                |    |        |           |
|-------------|---|----------------|----|--------|-----------|
| rs11580501  | 1 | 157055760 C    | 23 | 4 T    | 0.0002248 |
| rs67980707  | 1 | 157060544 G    | 23 | 4 A    | 0.0002248 |
| rs67947469  | 1 | 157061643 T    | 23 | 4 C    | 0.0002248 |
| rs12136960  | 1 | 157062739 G    | 30 | 7 C    | 0.0000683 |
| rs12749198  | 1 | 157074813 A    | 18 | 3 G    | 0.0009486 |
| rs11585088  | 1 | 160975049 G    | 5  | 20 A   | 0.0004383 |
| rs67414804  | 1 | 160988485 T    | 6  | 23 G   | 0.0001763 |
| rs72714913  | 1 | 161117902 G    | 3  | 16 A   | 0.0009912 |
| rs10918046  | 1 | 164526190 G    | 14 | 1 A    | 0.0007094 |
| rs11800702  | 1 | 170335130 A    | 31 | 9 G    | 0.0002479 |
| rs28782297  | 1 | 170924418 A    | 5  | 19 G   | 0.0008415 |
| rs146426777 | 1 | 170924776 T    | 5  | 19 C   | 0.0008415 |
| rs76289818  | 1 | 170939874 T    | 5  | 19 A   | 0.0007163 |
| rs9427208   | 1 | 170940240 T    | 5  | 19 C   | 0.0008415 |
| rs143694065 | 1 | 170969416 GT   | 2  | 15 G   | 0.0004755 |
| rs11488713  | 1 | 170972335 A    | 2  | 15 T   | 0.0004755 |
| rs9426924   | 1 | 170973094 T    | 2  | 15 C   | 0.0004755 |
| rs149697643 | 1 | 170973559 G    | 2  | 15 GC  | 0.0004755 |
| rs11486182  | 1 | 170975587 A    | 2  | 15 G   | 0.0004755 |
| rs61816860  | 1 | 170979240 A    | 2  | 15 G   | 0.0004755 |
| rs9426925   | 1 | 170982001 G    | 2  | 15 A   | 0.0004755 |
| rs41310903  | 1 | 170983976 T    | 2  | 15 C   | 0.0004755 |
| rs72710570  | 1 | 170985995 C    | 2  | 15 A   | 0.0004755 |
| rs72710571  | 1 | 170986343 T    | 2  | 15 C   | 0.0004755 |
| rs56053729  | 1 | 170986415 T    | 2  | 15 G   | 0.0004755 |
| rs55847906  | 1 | 170986416 T    | 2  | 15 C   | 0.0004755 |
| rs72710573  | 1 | 170987674 G    | 2  | 15 A   | 0.0004755 |
| rs72710575  | 1 | 170988418 A    | 2  | 15 G   | 0.0004755 |
| rs61336965  | 1 | 170989327 C    | 2  | 15 CAA | 0.0004755 |
| rs114283104 | 1 | 170989942 A    | 2  | 15 G   | 0.0004755 |
| rs116494685 | 1 | 170990527 G    | 2  | 15 A   | 0.0004755 |
| rs56225411  | 1 | 170990995 T    | 2  | 14 C   | 0.0009649 |
| rs16863948  | 1 | 170992100 A    | 2  | 15 G   | 0.0004755 |
| rs16863949  | 1 | 170992602 C    | 2  | 15 A   | 0.0004755 |
| rs61816864  | 1 | 170992716 A    | 2  | 15 T   | 0.0004755 |
| rs72710577  | 1 | 170993313 A    | 2  | 15 G   | 0.0004755 |
| 1:170993440 | 1 | 170993440 ACGG | 2  | 15 A   | 0.0004755 |
| rs16863950  | 1 | 170994761 A    | 2  | 15 G   | 0.0004755 |
| rs151073251 | 1 | 170995015 TC   | 2  | 15 T   | 0.0004755 |
| rs146990598 | 1 | 170995639 TC   | 2  | 15 T   | 0.0004755 |
| rs72710580  | 1 | 170995732 A    | 2  | 15 G   | 0.0004755 |

|             |   |                         |    |       |           |
|-------------|---|-------------------------|----|-------|-----------|
| rs114765529 | 1 | 170997401 T             | 2  | 15 G  | 0.0004755 |
| rs72710581  | 1 | 170999936 G             | 2  | 15 A  | 0.0004755 |
| rs56346740  | 1 | 171002346 C             | 2  | 15 G  | 0.0004755 |
| rs61816868  | 1 | 171004783 T             | 2  | 15 C  | 0.0004755 |
| rs72710583  | 1 | 171005464 G             | 2  | 15 A  | 0.0004755 |
| rs61816869  | 1 | 171005760 T             | 2  | 15 C  | 0.0004755 |
| rs78664997  | 1 | 175165977 T             | 0  | 11 C  | 0.0001895 |
| rs640496    | 1 | 183157036 C             | 24 | 43 T  | 0.000471  |
| rs495418    | 1 | 183159664 A             | 24 | 43 G  | 0.000471  |
| 1:183160328 | 1 | 183160328 TA            | 24 | 43 T  | 0.0007782 |
| rs594026    | 1 | 183160477 T             | 24 | 43 G  | 0.000471  |
| rs687988    | 1 | 183161310 T             | 24 | 43 G  | 0.000471  |
| rs481023    | 1 | 183161869 T             | 24 | 42 G  | 0.0008352 |
| rs672525    | 1 | 183162450 A             | 24 | 43 G  | 0.000471  |
| rs509826    | 1 | 183162705 A             | 24 | 43 G  | 0.000471  |
| rs657869    | 1 | 183163430 T             | 24 | 43 G  | 0.000471  |
| rs2477439   | 1 | 183164905 C             | 24 | 43 A  | 0.000471  |
| 1:183164928 | 1 | 183164928 GTTTAATGTGATG | 24 | 42 G  | 0.0008352 |
| 1:183164934 | 1 | 183164934 T             | 24 | 42 G  | 0.0008352 |
| 1:183164935 | 1 | 183164935 G             | 24 | 42 GC | 0.0008352 |
| rs61479242  | 1 | 183164937 A             | 24 | 42 C  | 0.0008352 |
| rs572977    | 1 | 183164991 G             | 24 | 43 C  | 0.000471  |
| rs10911276  | 1 | 183165358 C             | 23 | 43 T  | 0.0002487 |
| rs1760628   | 1 | 183165505 C             | 24 | 43 G  | 0.000471  |
| rs1760629   | 1 | 183165518 T             | 24 | 43 G  | 0.000471  |
| rs627064    | 1 | 183165716 T             | 24 | 43 C  | 0.000471  |
| rs35890410  | 1 | 183165895 GA            | 24 | 43 G  | 0.000471  |
| rs519350    | 1 | 183166573 A             | 24 | 43 G  | 0.000471  |
| rs596263    | 1 | 183166582 A             | 24 | 43 G  | 0.000471  |
| rs3118182   | 1 | 183167175 G             | 24 | 43 A  | 0.000471  |
| rs473789    | 1 | 183169032 T             | 25 | 43 A  | 0.0008649 |
| rs12724111  | 1 | 183169122 G             | 21 | 40 A  | 0.0006238 |
| rs1760632   | 1 | 183169386 G             | 25 | 43 A  | 0.0008649 |
| rs661451    | 1 | 183169690 C             | 26 | 44 T  | 0.0008911 |
| rs648341    | 1 | 183170353 C             | 25 | 43 T  | 0.0008649 |
| rs570415    | 1 | 183171316 A             | 23 | 43 G  | 0.0002487 |
| rs4549996   | 1 | 186707043 C             | 8  | 25 G  | 0.0006969 |
| rs76858875  | 1 | 188667613 T             | 16 | 2 G   | 0.0008912 |
| rs71519083  | 1 | 189717270 A             | 24 | 48 T  | 0.0000187 |
| rs71519084  | 1 | 189717272 A             | 24 | 48 T  | 0.0000187 |
| rs71637213  | 1 | 189717274 A             | 24 | 48 T  | 0.0000187 |

|             |   |               |    |       |            |
|-------------|---|---------------|----|-------|------------|
| 1:192580429 | 1 | 192580429 C   | 45 | 20 A  | 0.0007326  |
| rs56262835  | 1 | 198237275 CT  | 16 | 2 C   | 0.0008956  |
| 1:203595404 | 1 | 203595404 TGG | 25 | 6 T   | 0.0005533  |
| rs77861062  | 1 | 208286360 C   | 0  | 9 A   | 0.0009641  |
| rs4844851   | 1 | 209717109 T   | 24 | 42 G  | 0.0008352  |
| rs11119358  | 1 | 210042456 C   | 9  | 25 T  | 0.0008942  |
| rs7522894   | 1 | 211082050 A   | 1  | 13 G  | 0.0003716  |
| rs12028941  | 1 | 211088474 T   | 0  | 13 C  | 0.00003603 |
| rs12021704  | 1 | 211088631 C   | 1  | 13 G  | 0.0003716  |
| rs59806283  | 1 | 211088915 G   | 1  | 15 GC | 0.00007965 |
| rs12030905  | 1 | 211090360 T   | 1  | 15 C  | 0.00007965 |
| rs61848992  | 1 | 211091849 T   | 1  | 15 C  | 0.00007965 |
| rs2358210   | 1 | 211094834 C   | 2  | 15 T  | 0.0004755  |
| rs57655345  | 1 | 211108933 C   | 2  | 15 T  | 0.0004755  |
| rs12036999  | 1 | 211112257 T   | 0  | 10 C  | 0.0004292  |
| rs6540636   | 1 | 211120598 A   | 2  | 14 G  | 0.0009649  |
| rs6675213   | 1 | 211121045 A   | 1  | 12 C  | 0.0007887  |
| rs61849000  | 1 | 211121274 T   | 1  | 12 C  | 0.0007887  |
| rs6678568   | 1 | 211122469 C   | 2  | 14 T  | 0.0009649  |
| rs7554723   | 1 | 211129493 C   | 1  | 12 T  | 0.0007887  |
| rs117202850 | 1 | 211129598 T   | 0  | 10 C  | 0.0004292  |
| rs6666287   | 1 | 211130853 T   | 1  | 12 G  | 0.0007887  |
| rs12039302  | 1 | 211133122 A   | 0  | 10 G  | 0.0004292  |
| rs7551412   | 1 | 211134593 T   | 1  | 13 A  | 0.0003716  |
| rs7553997   | 1 | 211134663 C   | 1  | 13 T  | 0.0003716  |
| rs7518841   | 1 | 211138059 G   | 1  | 12 T  | 0.0007887  |
| rs6540638   | 1 | 211139765 C   | 1  | 12 A  | 0.0007887  |
| rs56999636  | 1 | 211141038 A   | 0  | 10 T  | 0.0004292  |
| rs12406562  | 1 | 211142718 C   | 1  | 13 T  | 0.0003716  |
| rs74422102  | 1 | 211149108 C   | 0  | 10 A  | 0.0004292  |
| rs7523929   | 1 | 211149360 C   | 1  | 12 T  | 0.0007887  |
| rs61849024  | 1 | 211152436 T   | 1  | 12 A  | 0.0007887  |
| rs1501544   | 1 | 211153252 A   | 1  | 12 T  | 0.0007887  |
| rs1501545   | 1 | 211153638 A   | 1  | 12 G  | 0.0007887  |
| rs7515316   | 1 | 211156440 T   | 1  | 17 C  | 0.00001632 |
| rs7529625   | 1 | 211156698 C   | 1  | 17 T  | 0.00001632 |
| rs7537597   | 1 | 211156775 C   | 1  | 17 G  | 0.00001632 |
| rs6663672   | 1 | 211157628 T   | 1  | 17 C  | 0.00001632 |
| rs148749633 | 1 | 211158461 T   | 0  | 10 C  | 0.0004292  |
| rs75986786  | 1 | 211158739 T   | 1  | 17 C  | 0.00001632 |
| rs77208679  | 1 | 211158768 G   | 1  | 16 A  | 0.00003625 |

|             |   |                  |   |                  |            |
|-------------|---|------------------|---|------------------|------------|
| rs10863872  | 1 | 211159950 G      | 1 | 17 A             | 0.00001632 |
| rs10863873  | 1 | 211159985 C      | 1 | 17 T             | 0.00001632 |
| rs150093062 | 1 | 211160642 G      | 1 | 17 A             | 0.00001632 |
| rs6671367   | 1 | 211161351 C      | 1 | 17 A             | 0.00001632 |
| rs12043937  | 1 | 211161502 G      | 1 | 17 A             | 0.00001632 |
| rs12043952  | 1 | 211161510 C      | 1 | 17 A             | 0.00001632 |
| rs6659020   | 1 | 211161526 T      | 1 | 17 C             | 0.00001632 |
| rs6659135   | 1 | 211161618 T      | 1 | 16 C             | 0.00003625 |
| rs6680997   | 1 | 211163369 G      | 1 | 16 T             | 0.00003625 |
| rs12070402  | 1 | 211165752 T      | 1 | 17 C             | 0.00001632 |
| rs1532682   | 1 | 211166426 G      | 1 | 17 T             | 0.00001632 |
| rs142791118 | 1 | 211167308 GA     | 1 | 16 G             | 0.00003625 |
| rs76610265  | 1 | 211167315 G      | 1 | 16 T             | 0.00003625 |
| rs12022715  | 1 | 211167954 C      | 1 | 17 T             | 0.00001632 |
| rs12022739  | 1 | 211168085 C      | 1 | 17 T             | 0.00001632 |
| rs1501548   | 1 | 211168634 C      | 1 | 17 T             | 0.00001632 |
| rs1501549   | 1 | 211168669 T      | 1 | 17 G             | 0.00001632 |
| rs1501550   | 1 | 211168759 A      | 1 | 17 G             | 0.00001632 |
| rs11119654  | 1 | 211168993 G      | 1 | 17 A             | 0.00001632 |
| rs6687069   | 1 | 211169973 G      | 1 | 17 C             | 0.00001632 |
| rs6689715   | 1 | 211170209 T      | 1 | 17 C             | 0.00001632 |
| rs145184581 | 1 | 211173970 C      | 1 | 17 A             | 0.00001632 |
| rs35683927  | 1 | 211175219 A      | 1 | 17 G             | 0.00001632 |
| rs34279520  | 1 | 211175222 G      | 1 | 17 A             | 0.00001632 |
| 1:211175223 | 1 | 211175223 GA     | 1 | 17 G             | 0.00001632 |
| rs12403500  | 1 | 211175373 A      | 1 | 17 G             | 0.00001632 |
| rs12026311  | 1 | 211176612 A      | 1 | 16 T             | 0.00003625 |
| rs12025525  | 1 | 211176618 G      | 1 | 16 A             | 0.00003625 |
| rs12026374  | 1 | 211176816 A      | 1 | 16 T             | 0.00003625 |
| rs12027535  | 1 | 211178147 G      | 1 | 17 T             | 0.00001632 |
| rs12030715  | 1 | 211178374 A      | 1 | 16 G             | 0.00003625 |
| rs11806852  | 1 | 211178828 A      | 1 | 16 C             | 0.00003625 |
| rs78743738  | 1 | 211180810 C      | 1 | 16 T             | 0.00003625 |
| rs61850228  | 1 | 211183952 A      | 1 | 17 T             | 0.00001632 |
| rs61848562  | 1 | 211187679 T      | 1 | 16 C             | 0.00003625 |
| rs139001420 | 1 | 211190264 AAAAAT | 1 | 12 A             | 0.0007119  |
| rs7514606   | 1 | 211191730 G      | 1 | 16 C             | 0.00003625 |
| rs57179129  | 1 | 211194404 T      | 1 | 16 C             | 0.00003625 |
| rs201353335 | 1 | 211196494 A      | 0 | 10 AAATAAATAAATT | 0.0004869  |
| rs11119666  | 1 | 211201592 A      | 6 | 22 G             | 0.000342   |
| rs1604371   | 1 | 211203732 G      | 6 | 22 T             | 0.000342   |

|             |   |                   |    |         |             |
|-------------|---|-------------------|----|---------|-------------|
| rs4575146   | 1 | 211204122 T       | 1  | 16 A    | 0.00003625  |
| rs4570464   | 1 | 211204187 C       | 1  | 16 A    | 0.00003625  |
| rs6688920   | 1 | 211205507 A       | 1  | 16 C    | 0.00003625  |
| rs75983525  | 1 | 211205657 C       | 1  | 16 T    | 0.00003625  |
| rs183507111 | 1 | 211205883 G       | 1  | 17 A    | 0.00001632  |
| rs75886883  | 1 | 211208652 A       | 0  | 9 G     | 0.0009641   |
| rs61848568  | 1 | 211208841 T       | 1  | 16 C    | 0.00003625  |
| rs6666342   | 1 | 211209023 G       | 1  | 17 T    | 0.00001632  |
| rs57045219  | 1 | 211209354 T       | 3  | 18 C    | 0.0002532   |
| rs58255417  | 1 | 211209457 T       | 1  | 17 C    | 0.00001632  |
| rs11119668  | 1 | 211209776 G       | 1  | 17 A    | 0.00001632  |
| rs6540648   | 1 | 211210280 A       | 1  | 17 C    | 0.00001632  |
| rs114901383 | 1 | 216622783 A       | 11 | 0 G     | 0.0007855   |
| 1:221854004 | 1 | 221854004 A       | 5  | 21 ACAC | 0.0002135   |
| 1:223624884 | 1 | 223624884 G       | 17 | 2 A     | 0.0004076   |
| rs5050      | 1 | 230849886 G       | 3  | 16 T    | 0.0009912   |
| rs6683321   | 1 | 230851628 A       | 3  | 16 G    | 0.0009912   |
| rs12568273  | 1 | 234506616 G       | 14 | 36 A    | 0.00003962  |
| rs45577939  | 1 | 234509865 G       | 21 | 43 T    | 0.0001081   |
| rs4300255   | 1 | 234510262 G       | 21 | 42 A    | 0.0001202   |
| rs7554965   | 1 | 234511541 A       | 14 | 38 G    | 0.000009956 |
| rs11285466  | 1 | 234512010 T       | 14 | 38 TC   | 0.000009956 |
| rs6671513   | 1 | 234512169 G       | 14 | 38 A    | 0.000009956 |
| rs10429821  | 1 | 234512471 C       | 25 | 43 T    | 0.0008649   |
| rs10429823  | 1 | 234512583 C       | 14 | 38 T    | 0.000009956 |
| rs6681436   | 1 | 234514025 C       | 14 | 38 T    | 0.000009956 |
| rs6664462   | 1 | 234514485 T       | 14 | 38 G    | 0.000009956 |
| rs10797537  | 1 | 234514613 T       | 14 | 36 G    | 0.00003962  |
| rs10797538  | 1 | 234514672 A       | 13 | 35 G    | 0.00001184  |
| rs12024011  | 1 | 234514725 A       | 11 | 36 G    | 0.000003952 |
| rs55884696  | 1 | 234515265 T       | 14 | 38 C    | 0.000009956 |
| rs6684927   | 1 | 234516617 A       | 14 | 38 G    | 0.000009956 |
| rs4477318   | 1 | 234517227 T       | 14 | 38 A    | 0.000009956 |
| rs12401853  | 1 | 234517474 C       | 15 | 38 A    | 0.00002412  |
| rs149002825 | 1 | 234518776 AGAGAAG | 11 | 34 A    | 0.00001988  |
| rs10797539  | 1 | 234519385 C       | 14 | 38 T    | 0.000009956 |
| rs60111174  | 1 | 234520784 ACTT    | 14 | 38 A    | 0.000009956 |
| rs10910424  | 1 | 234521024 T       | 14 | 38 C    | 0.000009956 |
| rs10910425  | 1 | 234521118 C       | 14 | 38 T    | 0.000009956 |
| rs10752785  | 1 | 234521718 T       | 22 | 41 G    | 0.0004309   |
| rs7527165   | 1 | 234524045 T       | 14 | 38 C    | 0.000009956 |



|             |   |              |    |      |            |
|-------------|---|--------------|----|------|------------|
| rs12023971  | 1 | 234525333 A  | 14 | 38 G | 0.00009956 |
| rs6669190   | 1 | 234525940 C  | 29 | 48 T | 0.0005332  |
| rs12402835  | 1 | 234526732 C  | 14 | 38 G | 0.00009956 |
| rs3862040   | 1 | 234527575 T  | 24 | 46 C | 0.0000732  |
| rs7523423   | 1 | 234528373 T  | 24 | 46 C | 0.0000732  |
| rs2175594   | 1 | 234529552 T  | 23 | 47 C | 0.00001794 |
| rs2175593   | 1 | 234529570 A  | 23 | 46 G | 0.00003593 |
| rs10910426  | 1 | 234530325 G  | 24 | 46 A | 0.0000732  |
| rs10797540  | 1 | 234530370 A  | 24 | 46 G | 0.0000732  |
| rs12031728  | 1 | 234537992 A  | 4  | 18 G | 0.0009242  |
| rs10910427  | 1 | 234539157 T  | 24 | 46 C | 0.0000732  |
| rs3768288   | 1 | 234540547 T  | 50 | 25 C | 0.0009811  |
| rs1141264   | 1 | 234546245 T  | 19 | 43 C | 0.00002243 |
| rs12035712  | 1 | 234555310 C  | 12 | 30 T | 0.0005652  |
| rs10797541  | 1 | 234555447 A  | 12 | 30 G | 0.0005652  |
| rs6661926   | 1 | 234556630 T  | 13 | 30 C | 0.0007578  |
| rs6669819   | 1 | 234556646 A  | 13 | 30 T | 0.0007578  |
| rs6666922   | 1 | 234556774 T  | 12 | 30 A | 0.0005652  |
| rs6703763   | 1 | 234556984 A  | 12 | 30 G | 0.0005652  |
| rs6703898   | 1 | 234557171 C  | 12 | 30 G | 0.0005652  |
| rs6665103   | 1 | 234557360 T  | 12 | 30 C | 0.0005652  |
| rs750813    | 1 | 234557918 A  | 12 | 30 C | 0.0005652  |
| rs750814    | 1 | 234558430 G  | 12 | 30 A | 0.0005652  |
| rs6676736   | 1 | 234558771 C  | 12 | 30 T | 0.0005652  |
| rs6676309   | 1 | 234558966 T  | 12 | 30 A | 0.0005652  |
| rs6676815   | 1 | 234559397 G  | 12 | 30 A | 0.0005652  |
| rs3820603   | 1 | 234559804 T  | 12 | 30 A | 0.0005652  |
| rs10910430  | 1 | 234560927 G  | 12 | 30 C | 0.0005652  |
| rs6429207   | 1 | 235798334 A  | 44 | 19 C | 0.0006784  |
| rs4660139   | 1 | 236155817 C  | 16 | 35 T | 0.000362   |
| rs12074023  | 1 | 240631508 A  | 1  | 12 G | 0.0008669  |
| rs7529566   | 1 | 246130744 C  | 8  | 27 A | 0.00009961 |
| rs2066028   | 1 | 246130872 T  | 8  | 27 C | 0.00009961 |
| rs61839381  | 1 | 246133416 A  | 8  | 27 G | 0.00009961 |
| rs146192520 | 1 | 246134737 TA | 8  | 27 T | 0.00009339 |
| rs61839384  | 1 | 246134977 G  | 8  | 27 C | 0.00009961 |
| rs11576666  | 1 | 246136553 G  | 8  | 27 A | 0.00009961 |
| rs11811545  | 1 | 246136870 A  | 12 | 31 C | 0.0001903  |
| rs10802305  | 1 | 246142250 T  | 8  | 26 C | 0.0001919  |
| rs10754491  | 1 | 246142279 C  | 14 | 33 T | 0.0002703  |
| rs199605639 | 1 | 246171117 CA | 1  | 14 C | 0.0002194  |

|             |   |            |    |                  |            |
|-------------|---|------------|----|------------------|------------|
| rs12993335  | 2 | 2424210 A  | 45 | 20 G             | 0.0007326  |
| rs62119788  | 2 | 3057257 A  | 12 | 0 T              | 0.0003752  |
| rs202066201 | 2 | 3528553 C  | 32 | 10 CTT           | 0.0003432  |
| rs1622254   | 2 | 7130521 G  | 1  | 17 A             | 0.00001859 |
| 2:7130525   | 2 | 7130525 G  | 1  | 15 A             | 0.0001027  |
| 2:7130527   | 2 | 7130527 G  | 1  | 13 A             | 0.0003716  |
| 2:7130528   | 2 | 7130528 C  | 0  | 13 CACACACACACAC | 0.00003603 |
| rs138874463 | 2 | 11151955 A | 9  | 27 ACAAGAACTTACC | 0.0002633  |
| rs114088839 | 2 | 23828157 A | 0  | 9 G              | 0.0009641  |
| rs6546911   | 2 | 26545067 C | 52 | 28 T             | 0.0008402  |
| rs35337085  | 2 | 29581969 T | 14 | 31 TA            | 0.0006984  |
| rs207423    | 2 | 31547084 G | 40 | 16 A             | 0.0005221  |
| rs35733574  | 2 | 31547119 C | 40 | 16 CTTTT         | 0.0005221  |
| rs207424    | 2 | 31547238 A | 40 | 16 G             | 0.0005221  |
| rs635581    | 2 | 31549213 T | 39 | 16 G             | 0.0009032  |
| rs13385162  | 2 | 31724929 T | 15 | 35 C             | 0.0001708  |
| rs11684698  | 2 | 31727524 A | 15 | 35 T             | 0.0001708  |
| rs4952218   | 2 | 31731120 A | 15 | 35 T             | 0.0001708  |
| rs2365778   | 2 | 31738219 T | 28 | 46 C             | 0.0009321  |
| rs6543630   | 2 | 31740034 A | 14 | 33 G             | 0.0002703  |
| rs56175176  | 2 | 31741566 T | 14 | 32 C             | 0.0004925  |
| rs1475054   | 2 | 31741965 G | 14 | 32 C             | 0.0004925  |
| rs6760199   | 2 | 31742278 A | 14 | 32 C             | 0.0004925  |
| rs2224310   | 2 | 31742467 C | 14 | 32 T             | 0.0004925  |
| rs2208158   | 2 | 31742862 T | 14 | 32 A             | 0.0004925  |
| rs4952197   | 2 | 31767131 A | 14 | 31 G             | 0.0008795  |
| rs725631    | 2 | 31781026 A | 17 | 35 C             | 0.0007327  |
| rs58811103  | 2 | 31801180 G | 17 | 35 C             | 0.0007327  |
| rs2754530   | 2 | 31803403 T | 17 | 36 C             | 0.0004114  |
| rs2268799   | 2 | 31803495 T | 17 | 36 C             | 0.0004114  |
| rs806645    | 2 | 31807940 T | 17 | 36 C             | 0.0004114  |
| rs11403363  | 2 | 31807998 A | 17 | 35 AT            | 0.0007327  |
| rs502139    | 2 | 31811268 T | 17 | 35 C             | 0.0007327  |
| rs633376    | 2 | 31815191 T | 15 | 34 G             | 0.0003148  |
| rs809364    | 2 | 31815453 A | 15 | 34 G             | 0.0003148  |
| rs646674    | 2 | 31815844 A | 15 | 33 G             | 0.0005689  |
| rs1090846   | 2 | 31816341 T | 15 | 33 C             | 0.0005689  |
| rs75688847  | 2 | 31816734 C | 17 | 36 T             | 0.0004114  |
| rs600015    | 2 | 31820300 G | 17 | 37 C             | 0.0002264  |
| rs607294    | 2 | 31832807 T | 19 | 37 C             | 0.0009069  |
| rs623419    | 2 | 31834078 A | 19 | 37 G             | 0.0009069  |

|             |   |                |    |                 |           |
|-------------|---|----------------|----|-----------------|-----------|
| rs655548    | 2 | 31836658 A     | 18 | 36 C            | 0.0008188 |
| rs477517    | 2 | 31848637 C     | 17 | 35 T            | 0.0007327 |
| rs614173    | 2 | 31853202 C     | 18 | 36 T            | 0.0008188 |
| rs546935    | 2 | 31853674 A     | 17 | 37 G            | 0.0002264 |
| rs35826411  | 2 | 31859226 C     | 16 | 34 CA           | 0.0006492 |
| rs71446010  | 2 | 31859714 C     | 2  | 17 T            | 0.000111  |
| rs481344    | 2 | 31859919 A     | 16 | 34 G            | 0.0006492 |
| rs681482    | 2 | 31871256 A     | 17 | 36 G            | 0.0004114 |
| rs589427    | 2 | 31872513 A     | 17 | 35 T            | 0.0007327 |
| rs553464    | 2 | 31873476 G     | 21 | 40 A            | 0.0006238 |
| rs68057272  | 2 | 31875044 AGATT | 20 | 39 A            | 0.0005694 |
| rs12479192  | 2 | 31923042 T     | 16 | 34 C            | 0.0006492 |
| rs1580329   | 2 | 32016677 G     | 17 | 36 A            | 0.0004114 |
| rs223675    | 2 | 32026249 A     | 13 | 32 G            | 0.0002287 |
| rs34450929  | 2 | 32034082 A     | 2  | 15 G            | 0.0004755 |
| rs114467817 | 2 | 32083640 C     | 3  | 16 T            | 0.0009912 |
| rs10779914  | 2 | 32106040 A     | 15 | 33 C            | 0.0005689 |
| rs11124272  | 2 | 32142520 A     | 16 | 34 C            | 0.0006492 |
| rs61144237  | 2 | 32150343 A     | 9  | 25 G            | 0.0008942 |
| rs79379878  | 2 | 32152861 C     | 3  | 17 A            | 0.0005045 |
| rs2082185   | 2 | 32155175 G     | 13 | 30 A            | 0.0007578 |
| rs75440961  | 2 | 32219573 C     | 15 | 33 T            | 0.0005689 |
| rs12995113  | 2 | 32221763 C     | 3  | 17 T            | 0.0005045 |
| rs71446036  | 2 | 32226986 A     | 15 | 33 G            | 0.0005689 |
| rs12478134  | 2 | 32240783 G     | 14 | 31 C            | 0.0008795 |
| rs34702054  | 2 | 32256999 C     | 13 | 30 CA           | 0.0007578 |
| rs34965238  | 2 | 32285441 G     | 15 | 33 GA           | 0.0005689 |
| rs2280968   | 2 | 32290040 T     | 14 | 33 G            | 0.0002703 |
| rs13017027  | 2 | 32291903 T     | 11 | 30 C            | 0.0002453 |
| rs7556942   | 2 | 32295694 A     | 14 | 33 G            | 0.0002703 |
| rs17011801  | 2 | 32298072 T     | 14 | 33 A            | 0.0002703 |
| rs35112079  | 2 | 32302079 A     | 14 | 33 G            | 0.0002703 |
| rs11695080  | 2 | 32316886 C     | 10 | 27 G            | 0.0006386 |
| rs7557034   | 2 | 32316910 A     | 12 | 30 T            | 0.0005652 |
| rs3769605   | 2 | 32322456 G     | 14 | 33 A            | 0.0002703 |
| rs200363219 | 2 | 32327754 A     | 14 | 34 G            | 0.0001454 |
| rs6543648   | 2 | 32330314 A     | 14 | 33 G            | 0.0002703 |
| rs11676456  | 2 | 32331511 G     | 11 | 30 A            | 0.0002453 |
| 2:32336317  | 2 | 32336317 A     | 0  | 9 ATATAGTGTGTAT | 0.0008243 |
| rs6756085   | 2 | 32336522 G     | 14 | 33 A            | 0.0002703 |
| rs13010405  | 2 | 32338204 T     | 13 | 32 A            | 0.0003918 |

|             |   |            |    |          |           |
|-------------|---|------------|----|----------|-----------|
| rs11691939  | 2 | 32339561 T | 14 | 33 C     | 0.0002703 |
| rs7574000   | 2 | 32342888 C | 14 | 33 A     | 0.0002703 |
| rs56322034  | 2 | 32353013 C | 15 | 33 T     | 0.0005689 |
| rs2294178   | 2 | 32353324 C | 15 | 33 A     | 0.0005689 |
| rs13006495  | 2 | 32355490 T | 15 | 33 C     | 0.0005689 |
| rs13006880  | 2 | 32355539 A | 11 | 30 G     | 0.0002453 |
| rs12996943  | 2 | 32373645 C | 15 | 32 G     | 0.000877  |
| rs34197800  | 2 | 32389646 A | 15 | 33 C     | 0.0005689 |
| rs13013695  | 2 | 32391231 A | 12 | 30 G     | 0.0005652 |
| rs35978916  | 2 | 32400635 C | 14 | 31 T     | 0.0008795 |
| rs212742    | 2 | 32408629 T | 15 | 33 C     | 0.0005689 |
| rs375050    | 2 | 32413765 C | 15 | 33 T     | 0.0005689 |
| rs212751    | 2 | 32418808 T | 15 | 33 A     | 0.0005689 |
| rs212754    | 2 | 32421628 A | 15 | 33 G     | 0.0005689 |
| rs212761    | 2 | 32429288 T | 16 | 35 C     | 0.000362  |
| rs186135    | 2 | 32432578 C | 15 | 33 T     | 0.0005689 |
| rs212682    | 2 | 32432864 A | 15 | 33 G     | 0.0004934 |
| rs212683    | 2 | 32432934 A | 14 | 33 T     | 0.0002703 |
| rs212684    | 2 | 32433058 G | 15 | 33 C     | 0.0005689 |
| rs212685    | 2 | 32434701 A | 15 | 33 G     | 0.0005689 |
| rs177082    | 2 | 32438350 A | 15 | 32 T     | 0.000877  |
| rs212702    | 2 | 32444250 A | 12 | 30 G     | 0.0005652 |
| rs61393580  | 2 | 32461937 A | 15 | 33 AAAAG | 0.0005689 |
| rs212736    | 2 | 32473126 T | 12 | 30 C     | 0.0005652 |
| rs410469    | 2 | 32476992 T | 14 | 33 G     | 0.0002703 |
| rs7562653   | 2 | 32478629 T | 14 | 33 C     | 0.0002703 |
| rs385076    | 2 | 32489851 T | 16 | 36 C     | 0.0001978 |
| rs5830226   | 2 | 32493527 C | 15 | 33 CAT   | 0.0005689 |
| rs1035025   | 2 | 37949160 C | 53 | 27 T     | 0.0006109 |
| rs6544102   | 2 | 37951123 G | 30 | 49 A     | 0.0005383 |
| rs6544103   | 2 | 37951249 G | 30 | 49 A     | 0.0005383 |
| rs201262385 | 2 | 37952621 A | 43 | 19 G     | 0.000761  |
| rs149254951 | 2 | 37953287 G | 30 | 49 A     | 0.0005383 |
| rs143024314 | 2 | 37954040 A | 30 | 49 G     | 0.0005383 |
| rs148517021 | 2 | 37954483 A | 43 | 19 C     | 0.000761  |
| rs6544104   | 2 | 37954827 C | 30 | 49 T     | 0.0005383 |
| rs7587427   | 2 | 37955010 A | 30 | 49 T     | 0.0005383 |
| rs4450584   | 2 | 37955267 C | 30 | 49 T     | 0.0005383 |
| rs11891125  | 2 | 37955417 G | 30 | 49 C     | 0.0005383 |
| rs11692897  | 2 | 37956018 A | 30 | 49 C     | 0.0005383 |
| rs232549    | 2 | 38346736 A | 3  | 16 G     | 0.0009912 |

|             |   |            |    |       |           |
|-------------|---|------------|----|-------|-----------|
| rs2432663   | 2 | 38351642 T | 3  | 16 C  | 0.0009912 |
| rs2447750   | 2 | 38352037 T | 3  | 16 A  | 0.0009912 |
| rs2432662   | 2 | 38352174 T | 3  | 16 C  | 0.0009912 |
| rs232623    | 2 | 38357292 T | 3  | 16 C  | 0.0009912 |
| rs170818    | 2 | 38374567 T | 4  | 18 C  | 0.0009242 |
| rs232598    | 2 | 38376966 A | 4  | 18 T  | 0.0009242 |
| rs10177042  | 2 | 38563527 G | 37 | 14 C  | 0.0006739 |
| 2:43290255  | 2 | 43290255 G | 15 | 1 C   | 0.0004612 |
| rs7558342   | 2 | 46015851 T | 32 | 50 G  | 0.0009655 |
| rs75996100  | 2 | 46045223 T | 1  | 12 C  | 0.0007887 |
| rs13431476  | 2 | 46045551 T | 1  | 12 C  | 0.0007887 |
| rs72808733  | 2 | 46322160 A | 8  | 25 G  | 0.0003633 |
| rs67290491  | 2 | 46322166 G | 8  | 25 C  | 0.0003633 |
| rs66628040  | 2 | 46322232 A | 8  | 25 C  | 0.0003633 |
| rs67425308  | 2 | 46323103 A | 8  | 25 G  | 0.0003633 |
| rs17799476  | 2 | 46352326 G | 4  | 18 C  | 0.0009242 |
| rs34606309  | 2 | 46364687 T | 7  | 24 C  | 0.0002977 |
| rs61087417  | 2 | 47813986 A | 0  | 9 T   | 0.0009641 |
| rs17039159  | 2 | 49883594 C | 2  | 15 T  | 0.0004755 |
| rs10495981  | 2 | 49883809 C | 2  | 15 T  | 0.0004755 |
| rs75020896  | 2 | 49886012 G | 2  | 15 T  | 0.0004755 |
| rs76523299  | 2 | 49892510 C | 2  | 14 G  | 0.0009649 |
| rs55642256  | 2 | 49893646 C | 2  | 14 T  | 0.0009649 |
| rs4271798   | 2 | 49893851 G | 2  | 14 T  | 0.0009649 |
| rs76612430  | 2 | 49893866 C | 2  | 14 T  | 0.0009649 |
| rs2350700   | 2 | 49894534 C | 2  | 14 T  | 0.0009649 |
| rs76943415  | 2 | 49895770 C | 2  | 14 T  | 0.0009649 |
| rs116359123 | 2 | 49896274 G | 2  | 15 A  | 0.0004755 |
| rs56096801  | 2 | 49897226 C | 2  | 14 T  | 0.0009649 |
| rs55650884  | 2 | 49897367 T | 2  | 14 C  | 0.0009649 |
| rs76197520  | 2 | 49901119 T | 2  | 15 C  | 0.0004755 |
| rs55754993  | 2 | 49939073 G | 2  | 15 A  | 0.0004755 |
| rs17039201  | 2 | 49947538 T | 2  | 14 C  | 0.0009649 |
| rs72880459  | 2 | 49953640 A | 2  | 15 T  | 0.0004755 |
| rs1401325   | 2 | 49966481 C | 2  | 14 G  | 0.0009649 |
| rs6710424   | 2 | 49970721 C | 2  | 14 T  | 0.0009649 |
| rs72880477  | 2 | 49970967 C | 2  | 14 T  | 0.0009649 |
| rs12328055  | 2 | 49971239 A | 2  | 14 G  | 0.0009649 |
| rs59645701  | 2 | 49978243 G | 2  | 14 A  | 0.0009649 |
| rs10596176  | 2 | 50302053 G | 0  | 9 GTT | 0.0009641 |
| rs17838395  | 2 | 50329142 G | 0  | 9 A   | 0.0009641 |

|             |   |                       |    |           |            |
|-------------|---|-----------------------|----|-----------|------------|
| 2:50608662  | 2 | 50608662 T            | 7  | 22 C      | 0.0009169  |
| rs1468986   | 2 | 53861263 T            | 50 | 25 A      | 0.0009811  |
| rs35437504  | 2 | 54616263 G            | 1  | 13 A      | 0.0003716  |
| rs201701440 | 2 | 59148035 CT           | 18 | 2 C       | 0.0002408  |
| rs10490101  | 2 | 59149939 G            | 18 | 3 C       | 0.0009486  |
| rs76040012  | 2 | 59150981 C            | 19 | 3 T       | 0.0005082  |
| 2:63777368  | 2 | 63777368 C            | 6  | 26 CACACA | 0.00002181 |
| 2:63777371  | 2 | 63777371 C            | 6  | 23 A      | 0.0001763  |
| rs1867848   | 2 | 63777373 C            | 6  | 21 A      | 0.0006518  |
| 2:65887032  | 2 | 65887032 GGCTAAAAACGG | 0  | 9 G       | 0.0009641  |
| rs6546916   | 2 | 74872278 A            | 0  | 9 C       | 0.0009641  |
| rs34588873  | 2 | 76238523 T            | 7  | 26 G      | 0.00006834 |
| rs7603333   | 2 | 79357595 A            | 29 | 47 G      | 0.0009467  |
| rs77470225  | 2 | 84478792 A            | 0  | 9 G       | 0.0009641  |
| rs112124898 | 2 | 84581600 A            | 0  | 12 G      | 0.00008299 |
| rs77159567  | 2 | 84614874 A            | 0  | 12 T      | 0.00008299 |
| rs11126962  | 2 | 84638116 C            | 0  | 12 A      | 0.00008299 |
| 2:84647251  | 2 | 84647251 T            | 0  | 10 TA     | 0.0004292  |
| rs142296229 | 2 | 84672087 T            | 0  | 12 C      | 0.00008299 |
| rs76990652  | 2 | 84676268 C            | 0  | 11 T      | 0.0001895  |
| rs111878765 | 2 | 84714899 A            | 0  | 12 G      | 0.00008299 |
| rs11687501  | 2 | 85009989 A            | 0  | 11 G      | 0.0001895  |
| rs183611857 | 2 | 85056725 A            | 0  | 10 G      | 0.0004292  |
| rs11686064  | 2 | 85063529 A            | 0  | 10 G      | 0.0004292  |
| rs192817406 | 2 | 85232419 T            | 1  | 12 A      | 0.0007119  |
| rs75358661  | 2 | 85610056 G            | 0  | 10 A      | 0.0003694  |
| rs57603945  | 2 | 88835972 G            | 21 | 4 C       | 0.0008104  |
| 2:89076570  | 2 | 89076570 C            | 11 | 0 G       | 0.0007855  |
| 2:91634301  | 2 | 91634301 T            | 2  | 14 G      | 0.0009649  |
| 2:92295219  | 2 | 92295219 G            | 0  | 9 A       | 0.0009641  |
| rs79926110  | 2 | 96628770 G            | 1  | 12 A      | 0.0007887  |
| 2:104263114 | 2 | 104263114 A           | 4  | 18 G      | 0.0009446  |
| rs75852181  | 2 | 105363121 C           | 0  | 9 T       | 0.0009641  |
| rs143223356 | 2 | 108973424 GT          | 11 | 28 G      | 0.0008103  |
| rs6755756   | 2 | 109028656 G           | 11 | 28 A      | 0.0008103  |
| rs59581093  | 2 | 109029003 CA          | 0  | 10 C      | 0.0004292  |
| rs28413002  | 2 | 109031732 C           | 2  | 14 T      | 0.0009649  |
| rs62151377  | 2 | 109289585 C           | 2  | 16 A      | 0.0002312  |
| rs111522677 | 2 | 112047086 A           | 46 | 19 G      | 0.0002121  |
| rs3891956   | 2 | 112047880 A           | 37 | 10 G      | 0.00002452 |
| rs201218945 | 2 | 112047920 A           | 37 | 10 G      | 0.00002452 |

|             |   |                 |    |                |             |
|-------------|---|-----------------|----|----------------|-------------|
| rs143703637 | 2 | 112048156 C     | 36 | 9 G            | 0.000008319 |
| rs146039164 | 2 | 112048665 G     | 38 | 10 A           | 0.00001243  |
| 2:112054683 | 2 | 112054683 A     | 29 | 8 AAGCACTCAACA | 0.0003391   |
| rs58475388  | 2 | 112070553 C     | 52 | 24 A           | 0.0001653   |
| rs62162862  | 2 | 112070850 C     | 52 | 24 A           | 0.0001653   |
| rs2139360   | 2 | 112071399 C     | 52 | 24 T           | 0.0001653   |
| rs62162863  | 2 | 112071459 T     | 52 | 24 G           | 0.0001653   |
| 2:112071914 | 2 | 112071914 G     | 49 | 23 A           | 0.0002681   |
| rs140607302 | 2 | 112071996 A     | 52 | 24 G           | 0.0001653   |
| rs3814029   | 2 | 112073184 C     | 49 | 20 T           | 0.00006674  |
| rs200296231 | 2 | 112141350 T     | 44 | 17 C           | 0.000106    |
| rs78236988  | 2 | 112141772 C     | 44 | 17 T           | 0.000106    |
| rs202225640 | 2 | 112145399 A     | 44 | 17 G           | 0.000106    |
| rs116317168 | 2 | 112150554 C     | 44 | 17 T           | 0.000106    |
| rs4849389   | 2 | 116003178 A     | 19 | 3 G            | 0.0005082   |
| rs142458858 | 2 | 116116096 C     | 11 | 0 T            | 0.0007855   |
| rs13022237  | 2 | 116416128 G     | 10 | 29 A           | 0.0001875   |
| rs13027654  | 2 | 116416368 G     | 10 | 29 A           | 0.0001875   |
| rs13022167  | 2 | 116419585 C     | 10 | 29 G           | 0.0001875   |
| 2:117350749 | 2 | 117350749 T     | 7  | 24 C           | 0.0002593   |
| 2:117350751 | 2 | 117350751 T     | 7  | 24 C           | 0.0002593   |
| rs661500    | 2 | 119449361 A     | 5  | 19 C           | 0.0008415   |
| rs512681    | 2 | 119450163 A     | 5  | 19 C           | 0.0008415   |
| rs162752    | 2 | 119473589 T     | 7  | 22 A           | 0.0009169   |
| rs12622890  | 2 | 142456472 A     | 34 | 12 G           | 0.000839    |
| rs6721469   | 2 | 142591851 T     | 21 | 40 G           | 0.0006238   |
| rs6721397   | 2 | 142591936 A     | 21 | 40 C           | 0.0006238   |
| rs10191067  | 2 | 142592379 C     | 21 | 40 G           | 0.0006238   |
| rs10175758  | 2 | 146703546 T     | 11 | 0 C            | 0.0007837   |
| rs12476278  | 2 | 148123250 A     | 4  | 18 G           | 0.0009242   |
| rs41420149  | 2 | 148138416 A     | 4  | 18 G           | 0.0009242   |
| rs77388016  | 2 | 151733840 T     | 1  | 14 C           | 0.000173    |
| rs12151724  | 2 | 151734715 A     | 1  | 14 T           | 0.000173    |
| rs79308412  | 2 | 151737087 A     | 1  | 14 G           | 0.000173    |
| rs75482237  | 2 | 151738987 T     | 2  | 15 C           | 0.0004755   |
| rs77834577  | 2 | 151740507 G     | 2  | 15 A           | 0.0004755   |
| rs2190381   | 2 | 151743024 G     | 2  | 15 T           | 0.0004755   |
| rs2214898   | 2 | 151743382 A     | 2  | 15 T           | 0.0004755   |
| rs78904109  | 2 | 151744806 T     | 2  | 15 C           | 0.0004755   |
| 2:151745438 | 2 | 151745438 C     | 2  | 15 CAGAG       | 0.0002125   |
| 2:151745446 | 2 | 151745446 CAGAG | 2  | 15 C           | 0.0004755   |

|             |   |               |    |        |            |
|-------------|---|---------------|----|--------|------------|
| rs77142918  | 2 | 151749662 T   | 2  | 15 C   | 0.0004755  |
| rs78009712  | 2 | 151753877 G   | 2  | 15 A   | 0.0004755  |
| rs75229806  | 2 | 151755090 A   | 2  | 15 C   | 0.0004755  |
| rs79953851  | 2 | 151755522 C   | 2  | 15 A   | 0.0004755  |
| rs74568159  | 2 | 151756126 C   | 2  | 15 T   | 0.0004755  |
| rs76518694  | 2 | 151760617 T   | 0  | 13 C   | 0.00003603 |
| rs78507847  | 2 | 151761128 A   | 1  | 13 G   | 0.0003716  |
| rs78591232  | 2 | 151761540 T   | 3  | 18 C   | 0.0002532  |
| rs75158222  | 2 | 151762639 G   | 1  | 13 A   | 0.0003716  |
| rs60076148  | 2 | 151767049 G   | 52 | 26 T   | 0.0005884  |
| rs1405934   | 2 | 155294658 C   | 16 | 2 T    | 0.0008956  |
| rs1527862   | 2 | 155294795 T   | 16 | 2 C    | 0.0008956  |
| rs1527861   | 2 | 155294870 A   | 16 | 2 G    | 0.0008956  |
| rs10203804  | 2 | 155603154 A   | 19 | 37 G   | 0.0009069  |
| rs4991002   | 2 | 155993849 G   | 15 | 33 A   | 0.0005689  |
| rs77029648  | 2 | 161541408 C   | 0  | 9 T    | 0.0009641  |
| rs77706588  | 2 | 161541956 G   | 0  | 9 A    | 0.0009641  |
| rs77893985  | 2 | 161541961 G   | 0  | 9 A    | 0.0009641  |
| rs80008796  | 2 | 161543287 C   | 0  | 9 T    | 0.0009641  |
| rs77213830  | 2 | 161543637 A   | 0  | 9 C    | 0.0009641  |
| rs5835831   | 2 | 161545040 C   | 0  | 9 CATT | 0.0009641  |
| rs4072752   | 2 | 161545135 C   | 0  | 9 T    | 0.0009641  |
| rs12612157  | 2 | 161545838 G   | 0  | 9 A    | 0.0009641  |
| rs139886426 | 2 | 161547808 GGT | 0  | 10 G   | 0.0004292  |
| rs78974879  | 2 | 161548402 T   | 0  | 9 C    | 0.0009641  |
| rs12622288  | 2 | 161549843 T   | 0  | 9 C    | 0.0009641  |
| rs7420949   | 2 | 161549993 C   | 0  | 9 T    | 0.0009641  |
| rs12618371  | 2 | 161550899 A   | 0  | 9 C    | 0.0009641  |
| rs143582228 | 2 | 161551338 G   | 0  | 9 GT   | 0.0009641  |
| rs75879039  | 2 | 161552986 A   | 0  | 9 G    | 0.0009641  |
| rs75620633  | 2 | 161553675 G   | 0  | 9 A    | 0.0009641  |
| rs74741712  | 2 | 161554360 C   | 0  | 9 A    | 0.0009641  |
| rs4286290   | 2 | 161554761 G   | 0  | 9 A    | 0.0009641  |
| rs4467285   | 2 | 161554836 G   | 0  | 9 T    | 0.0009641  |
| rs4312509   | 2 | 161555014 T   | 0  | 9 C    | 0.0009641  |
| rs77567548  | 2 | 161555226 T   | 0  | 9 C    | 0.0009641  |
| rs12613593  | 2 | 161556205 A   | 0  | 9 T    | 0.0009641  |
| rs75365785  | 2 | 161557815 G   | 0  | 9 A    | 0.0009641  |
| rs76391215  | 2 | 161558215 T   | 0  | 9 C    | 0.0009641  |
| rs75313956  | 2 | 161558976 G   | 0  | 9 T    | 0.0009641  |
| rs79226712  | 2 | 161559188 C   | 0  | 9 T    | 0.0009641  |



|             |   |              |    |                 |           |
|-------------|---|--------------|----|-----------------|-----------|
| rs74268459  | 2 | 161559640 A  | 0  | 9 G             | 0.0009641 |
| rs75870328  | 2 | 161559814 AT | 0  | 9 A             | 0.0009641 |
| rs78550197  | 2 | 161561105 T  | 0  | 9 C             | 0.0009641 |
| rs74268460  | 2 | 161562594 T  | 0  | 9 A             | 0.0009641 |
| rs77082406  | 2 | 161564616 G  | 0  | 9 A             | 0.0009641 |
| rs112580488 | 2 | 161565442 G  | 0  | 9 A             | 0.0009641 |
| rs111444533 | 2 | 161565445 G  | 0  | 9 A             | 0.0009641 |
| rs79013319  | 2 | 161565611 A  | 0  | 9 T             | 0.0009641 |
| rs62187573  | 2 | 162378064 A  | 1  | 12 G            | 0.0007887 |
| rs73971596  | 2 | 169143262 A  | 2  | 14 C            | 0.0009649 |
| rs377300030 | 2 | 169146356 T  | 2  | 14 TTTCAATTATTA | 0.0009649 |
| rs312922    | 2 | 172566634 T  | 14 | 31 C            | 0.0008795 |
| 2:195965687 | 2 | 195965687 C  | 15 | 35 G            | 0.0003321 |
| 2:200492176 | 2 | 200492176 G  | 24 | 4 GT            | 0.0001159 |
| 2:202876876 | 2 | 202876876 A  | 11 | 0 G             | 0.0007855 |
| 2:202876896 | 2 | 202876896 G  | 11 | 0 GAA           | 0.000738  |
| 2:203185279 | 2 | 203185279 C  | 23 | 41 T            | 0.0008021 |
| rs2269079   | 2 | 207975211 C  | 16 | 2 T             | 0.0008956 |
| rs1263628   | 2 | 207977132 C  | 16 | 2 G             | 0.0008956 |
| 2:220525299 | 2 | 220525299 G  | 35 | 12 GA           | 0.0004754 |
| rs34083066  | 2 | 228958445 G  | 26 | 46 GTGCC        | 0.000277  |
| rs141601528 | 2 | 231706695 G  | 0  | 9 A             | 0.0009641 |
| rs201762374 | 2 | 233200229 G  | 24 | 5 C             | 0.0003659 |
| rs6727222   | 2 | 234908786 T  | 40 | 16 G            | 0.0005221 |
| rs6431650   | 2 | 234909387 G  | 40 | 16 A            | 0.0005221 |
| rs4664000   | 2 | 234910002 C  | 40 | 16 G            | 0.0005221 |
| rs6721761   | 2 | 234912661 T  | 41 | 17 G            | 0.0005984 |
| rs6734618   | 2 | 234916831 A  | 40 | 16 G            | 0.0005221 |
| rs6431651   | 2 | 234918215 C  | 40 | 15 T            | 0.0002535 |
| rs6431652   | 2 | 234918391 G  | 38 | 15 C            | 0.0007851 |
| rs4664001   | 2 | 234923881 T  | 39 | 15 C            | 0.0004501 |
| rs11563200  | 2 | 234924809 G  | 20 | 41 A            | 0.0001748 |
| rs2190951   | 2 | 234925075 T  | 39 | 15 C            | 0.0004501 |
| rs2052029   | 2 | 234927688 C  | 39 | 15 G            | 0.0004501 |
| rs10929331  | 2 | 234928493 G  | 20 | 40 A            | 0.0003188 |
| rs1118259   | 2 | 234928612 A  | 39 | 15 G            | 0.0004501 |
| rs35907217  | 2 | 234928973 T  | 39 | 15 TG           | 0.0004501 |
| rs28948678  | 2 | 234928977 A  | 39 | 15 G            | 0.0004501 |
| rs601129    | 2 | 234931053 T  | 39 | 15 C            | 0.0004501 |
| rs604082    | 2 | 234931325 A  | 39 | 15 T            | 0.0004501 |
| rs599294    | 2 | 234931434 A  | 20 | 39 G            | 0.0005694 |

|             |   |                          |    |         |            |
|-------------|---|--------------------------|----|---------|------------|
| rs56119740  | 2 | 234931598 C              | 20 | 39 CCT  | 0.0005694  |
| rs597104    | 2 | 234931934 G              | 23 | 41 A    | 0.0008021  |
| rs589763    | 2 | 234932165 T              | 20 | 39 C    | 0.0005694  |
| rs585284    | 2 | 234932263 A              | 39 | 15 G    | 0.0004501  |
| rs582082    | 2 | 234932954 T              | 49 | 24 G    | 0.000936   |
| rs679207    | 2 | 234933090 T              | 20 | 39 C    | 0.0005694  |
| rs663924    | 2 | 234934186 G              | 19 | 39 A    | 0.0002871  |
| rs11679031  | 2 | 234934461 G              | 18 | 38 A    | 0.0002562  |
| rs2176351   | 2 | 236394614 T              | 25 | 43 C    | 0.0008649  |
| rs12471071  | 2 | 240995216 T              | 55 | 24 C    | 0.00002382 |
| rs12471078  | 2 | 240995265 G              | 55 | 24 C    | 0.00002382 |
| rs7565889   | 2 | 240997521 G              | 43 | 18 A    | 0.0003905  |
| rs6437268   | 2 | 241000862 C              | 43 | 19 T    | 0.000761   |
| rs10933567  | 2 | 241001540 G              | 43 | 18 C    | 0.0003905  |
| rs7561353   | 2 | 241001882 T              | 43 | 18 A    | 0.0003905  |
| rs57680690  | 2 | 241004813 A              | 43 | 18 G    | 0.0003905  |
| rs12373696  | 2 | 241005516 T              | 43 | 18 C    | 0.0003905  |
| rs56858681  | 2 | 241008514 T              | 43 | 18 TTA  | 0.0003905  |
| rs1440011   | 2 | 241011768 A              | 43 | 18 G    | 0.0003905  |
| rs35163917  | 2 | 241011913 T              | 43 | 18 TTAA | 0.0003905  |
| rs12477805  | 2 | 241016702 T              | 42 | 18 C    | 0.0006782  |
| rs13026182  | 2 | 241016847 T              | 43 | 18 C    | 0.0003905  |
| rs4555372   | 2 | 241020364 A              | 42 | 16 G    | 0.0002826  |
| rs4854038   | 2 | 241023692 G              | 43 | 18 T    | 0.0003905  |
| rs4854034   | 2 | 241028467 T              | 43 | 18 G    | 0.0003905  |
| rs6725900   | 2 | 241029152 A              | 43 | 18 T    | 0.0003905  |
| rs34204713  | 2 | 241033563 T              | 42 | 18 C    | 0.0006782  |
| rs6756440   | 2 | 241040844 A              | 43 | 17 C    | 0.0001922  |
| rs34427943  | 2 | 241041745 T              | 43 | 18 C    | 0.0003905  |
| rs2369057   | 2 | 241043413 T              | 43 | 18 A    | 0.0003905  |
| rs2019849   | 2 | 241048221 C              | 51 | 22 T    | 0.0000673  |
| rs13422126  | 2 | 241048629 A              | 26 | 44 G    | 0.0008911  |
| rs60296014  | 2 | 241048730 TC             | 26 | 44 T    | 0.0008911  |
| rs4854030   | 2 | 241049147 A              | 26 | 45 G    | 0.0005028  |
| rs4854029   | 2 | 241049148 A              | 26 | 45 G    | 0.0005028  |
| rs4854028   | 2 | 241049442 A              | 26 | 44 C    | 0.0008911  |
| rs6740952   | 2 | 241049626 A              | 26 | 45 G    | 0.0005028  |
| rs10200500  | 2 | 241049977 C              | 26 | 45 T    | 0.0005028  |
| rs10191379  | 2 | 241050051 G              | 26 | 45 T    | 0.0005028  |
| 2:241050226 | 2 | 241050226 TCCTCCTCCCCTCC | 26 | 44 T    | 0.0004718  |
| rs13414100  | 2 | 241050480 G              | 26 | 45 A    | 0.0005028  |

|             |   |                         |    |                |            |
|-------------|---|-------------------------|----|----------------|------------|
| rs13424282  | 2 | 241050637 C             | 26 | 45 T           | 0.0005028  |
| rs7572067   | 2 | 241051245 C             | 26 | 45 T           | 0.0005028  |
| rs6721817   | 2 | 241051464 C             | 26 | 45 T           | 0.0005028  |
| rs6731182   | 2 | 241051504 T             | 27 | 45 C           | 0.0009136  |
| rs6722074   | 2 | 241051632 C             | 27 | 45 T           | 0.0009136  |
| rs2083407   | 2 | 241054069 T             | 48 | 23 C           | 0.0008881  |
| rs12467703  | 2 | 241054685 C             | 48 | 23 T           | 0.0008881  |
| rs13411615  | 2 | 241075991 C             | 55 | 27 A           | 0.0002959  |
| rs164462    | 3 | 8748648 A               | 45 | 20 G           | 0.0007326  |
| rs164466    | 3 | 8749171 C               | 43 | 17 T           | 0.0001922  |
| rs293786    | 3 | 9829226 A               | 34 | 11 C           | 0.0003893  |
| rs2933304   | 3 | 11096859 G              | 30 | 49 T           | 0.0005383  |
| rs55733119  | 3 | 11247589 T              | 13 | 30 G           | 0.0007578  |
| rs11915050  | 3 | 11265233 G              | 11 | 28 A           | 0.0008103  |
| rs11128544  | 3 | 11269122 A              | 11 | 28 G           | 0.0004277  |
| rs6442240   | 3 | 11270027 A              | 11 | 29 G           | 0.0004498  |
| rs6442241   | 3 | 11272005 G              | 10 | 27 A           | 0.0006386  |
| rs73812409  | 3 | 11289265 G              | 10 | 27 A           | 0.0006386  |
| rs34523650  | 3 | 11384407 A              | 9  | 25 AT          | 0.0008535  |
| rs2442772   | 3 | 11493926 A              | 12 | 30 G           | 0.0005652  |
| rs2454505   | 3 | 11497325 C              | 12 | 30 T           | 0.0005652  |
| rs9820368   | 3 | 14247401 A              | 10 | 28 G           | 0.0006908  |
| rs11709154  | 3 | 14582923 G              | 47 | 22 A           | 0.0008379  |
| 3:15506747  | 3 | 15506747 ATTTATTTATTTAT | 12 | 0 A            | 0.0003752  |
| 3:20974098  | 3 | 20974098 A              | 21 | 40 C           | 0.0006238  |
| rs12715025  | 3 | 22173653 C              | 39 | 14 T           | 0.0002137  |
| rs2360615   | 3 | 24105183 G              | 5  | 24 T           | 0.00006606 |
| rs111851541 | 3 | 24157398 A              | 12 | 28 AT          | 0.000945   |
| rs150826285 | 3 | 26036390 A              | 0  | 10 C           | 0.0004292  |
| rs140189968 | 3 | 26036393 G              | 0  | 10 C           | 0.0004292  |
| rs76666691  | 3 | 26048549 T              | 0  | 10 C           | 0.0004292  |
| rs75969402  | 3 | 26119136 A              | 0  | 10 G           | 0.0004292  |
| rs138451079 | 3 | 26166331 T              | 0  | 9 C            | 0.0009641  |
| rs13081103  | 3 | 29167341 A              | 0  | 9 G            | 0.0009641  |
| 3:30076122  | 3 | 30076122 A              | 11 | 0 AG           | 0.0008465  |
| rs60554515  | 3 | 30076125 A              | 11 | 0 AAGGAAGGAAGG | 0.0008465  |
| rs202156754 | 3 | 33803658 TTTTC          | 5  | 22 T           | 0.0002305  |
| 3:34205883  | 3 | 34205883 C              | 0  | 9 T            | 0.0009641  |
| rs200740771 | 3 | 38734879 C              | 0  | 11 A           | 0.0001895  |
| rs35669757  | 3 | 38735351 GCC            | 0  | 11 G           | 0.0001895  |
| rs7372391   | 3 | 38737643 C              | 1  | 13 T           | 0.0003716  |

|             |   |             |    |            |            |
|-------------|---|-------------|----|------------|------------|
| rs62243860  | 3 | 38738157 C  | 0  | 11 T       | 0.0001895  |
| rs62243861  | 3 | 38740297 A  | 1  | 12 G       | 0.0007887  |
| rs7429946   | 3 | 38747522 G  | 0  | 11 A       | 0.0001895  |
| rs6599244   | 3 | 38747735 G  | 0  | 11 A       | 0.0001895  |
| rs6599246   | 3 | 38747810 C  | 1  | 13 G       | 0.0003716  |
| rs11715513  | 3 | 38750383 A  | 0  | 11 G       | 0.0001895  |
| rs35364139  | 3 | 40936831 T  | 16 | 2 C        | 0.0008956  |
| rs17075284  | 3 | 43227494 C  | 3  | 16 T       | 0.0009912  |
| rs71325010  | 3 | 43927399 G  | 20 | 40 C       | 0.0003188  |
| rs979220    | 3 | 53556223 C  | 34 | 9 T        | 0.00004073 |
| rs35555534  | 3 | 53562519 C  | 26 | 4 T        | 0.00002957 |
| rs35306382  | 3 | 53579944 A  | 27 | 5 C        | 0.00005212 |
| rs67495732  | 3 | 53587939 G  | 27 | 6 A        | 0.0001606  |
| rs13100574  | 3 | 53596184 G  | 27 | 5 A        | 0.00005212 |
| rs71074927  | 3 | 53596681 TC | 27 | 5 T        | 0.0002419  |
| rs2304577   | 3 | 53778621 A  | 5  | 19 G       | 0.0008415  |
| rs11917063  | 3 | 59290258 C  | 24 | 42 A       | 0.0008352  |
| rs6774839   | 3 | 60689647 C  | 39 | 16 T       | 0.0009032  |
| rs67459165  | 3 | 61575592 T  | 41 | 17 C       | 0.0005984  |
| rs73096794  | 3 | 61609045 A  | 41 | 17 G       | 0.0005984  |
| rs4688645   | 3 | 61620896 T  | 42 | 17 C       | 0.0003422  |
| rs4072198   | 3 | 62212067 A  | 29 | 48 G       | 0.0005332  |
| rs875423    | 3 | 62246422 A  | 27 | 46 G       | 0.0005154  |
| rs7651544   | 3 | 62265999 C  | 30 | 48 A       | 0.0009571  |
| rs11312272  | 3 | 62304525 G  | 55 | 27 GT      | 0.0002959  |
| rs1881269   | 3 | 62309701 A  | 55 | 27 G       | 0.0002959  |
| rs10559149  | 3 | 63510527 G  | 35 | 13 GCA     | 0.000996   |
| rs2202494   | 3 | 63521556 G  | 36 | 13 A       | 0.0005704  |
| rs6445356   | 3 | 63523444 G  | 36 | 13 T       | 0.0005704  |
| rs6786839   | 3 | 63523865 C  | 35 | 13 A       | 0.000996   |
| rs7653698   | 3 | 63530406 T  | 36 | 13 A       | 0.0005704  |
| rs34910545  | 3 | 65299195 C  | 15 | 1 T        | 0.0003561  |
| 3:75878600  | 3 | 75878600 G  | 14 | 1 GTA      | 0.0007094  |
| 3:82897861  | 3 | 82897861 T  | 9  | 26 TTCTTTC | 0.0004896  |
| rs34040734  | 3 | 102934988 T | 0  | 9 A        | 0.0009641  |
| rs35080343  | 3 | 102966610 A | 0  | 11 G       | 0.0001895  |
| rs75918042  | 3 | 102971010 A | 1  | 12 C       | 0.0007887  |
| 3:102973408 | 3 | 102973408 G | 0  | 10 A       | 0.0004292  |
| rs75322311  | 3 | 102977885 C | 0  | 9 T        | 0.0009641  |
| rs34990881  | 3 | 102991912 A | 1  | 12 C       | 0.0007887  |
| 3:103008027 | 3 | 103008027 A | 0  | 11 G       | 0.0001895  |

|             |   |                          |    |      |            |
|-------------|---|--------------------------|----|------|------------|
| rs186150184 | 3 | 103008029 A              | 0  | 11 G | 0.0001895  |
| 3:103008030 | 3 | 103008030 TA             | 0  | 11 T | 0.0001895  |
| rs189281747 | 3 | 103008032 A              | 0  | 11 G | 0.0001895  |
| 3:103008035 | 3 | 103008035 TTATATTTAATATT | 0  | 11 T | 0.0001895  |
| 3:103008036 | 3 | 103008036 T              | 0  | 11 G | 0.0001895  |
| 3:103008038 | 3 | 103008038 A              | 0  | 11 G | 0.0001895  |
| 3:103008042 | 3 | 103008042 T              | 0  | 11 C | 0.0001895  |
| 3:103008045 | 3 | 103008045 ATATTTTATATTTT | 0  | 11 A | 0.0001895  |
| rs78237109  | 3 | 103008122 G              | 0  | 9 A  | 0.0009641  |
| rs74902008  | 3 | 103375964 G              | 0  | 9 C  | 0.0009641  |
| rs201763621 | 3 | 109425840 T              | 34 | 12 A | 0.000839   |
| rs6804591   | 3 | 115401996 G              | 4  | 19 A | 0.000262   |
| rs6804592   | 3 | 115401998 G              | 3  | 19 A | 0.0001307  |
| rs78119965  | 3 | 126631298 T              | 0  | 9 C  | 0.0009641  |
| 3:135028478 | 3 | 135028478 TTAG           | 17 | 1 T  | 0.00007617 |
| rs9852843   | 3 | 136938812 C              | 10 | 27 T | 0.0006386  |
| rs13324219  | 3 | 141037030 G              | 43 | 18 A | 0.0003905  |
| rs13065569  | 3 | 141077615 T              | 41 | 17 C | 0.0005984  |
| rs9857275   | 3 | 141078188 A              | 41 | 17 C | 0.0005984  |
| rs13100711  | 3 | 141082990 T              | 40 | 17 C | 0.0009115  |
| rs13098180  | 3 | 141091595 A              | 47 | 19 T | 0.0001149  |
| rs4683603   | 3 | 141092050 T              | 48 | 23 G | 0.0008881  |
| 3:146472411 | 3 | 146472411 TTCTCTC        | 3  | 15 T | 0.0008941  |
| rs7615559   | 3 | 148544932 T              | 39 | 16 C | 0.0009032  |
| rs56745771  | 3 | 148545301 T              | 41 | 16 C | 0.0002964  |
| rs60122003  | 3 | 150675457 T              | 2  | 14 G | 0.0009649  |
| rs996838    | 3 | 150693325 C              | 30 | 48 G | 0.0009571  |
| rs34793251  | 3 | 150703180 TA             | 55 | 29 T | 0.0009634  |
| 3:153129894 | 3 | 153129894 GTA            | 0  | 12 G | 0.00008299 |
| rs1907860   | 3 | 163546423 A              | 0  | 11 G | 0.0001895  |
| rs79902688  | 3 | 163549268 G              | 0  | 11 T | 0.0001895  |
| rs62293633  | 3 | 163557077 G              | 0  | 11 C | 0.0001895  |
| rs36022510  | 3 | 163557357 G              | 0  | 11 A | 0.0001895  |
| rs71156808  | 3 | 163562172 GT             | 0  | 11 G | 0.0001895  |
| rs62293636  | 3 | 163563579 C              | 0  | 11 T | 0.0001895  |
| rs12491031  | 3 | 163564559 C              | 0  | 11 T | 0.0001895  |
| rs13059483  | 3 | 163567068 A              | 0  | 11 C | 0.0001895  |
| rs13060209  | 3 | 163567299 C              | 0  | 11 G | 0.0001895  |
| 3:163568079 | 3 | 163568079 AAT            | 0  | 11 A | 0.0001895  |
| rs12489971  | 3 | 163572245 A              | 0  | 11 C | 0.0001895  |
| rs2365589   | 3 | 163572825 G              | 0  | 11 T | 0.0001895  |

|             |   |                         |    |       |               |
|-------------|---|-------------------------|----|-------|---------------|
| rs141466002 | 3 | 163573679 A             | 0  | 11 G  | 0.0001895     |
| rs34247696  | 3 | 163574006 T             | 0  | 11 G  | 0.0001895     |
| rs71630481  | 3 | 163574522 C             | 0  | 11 CA | 0.0001895     |
| rs66817151  | 3 | 163574558 A             | 0  | 11 C  | 0.0001895     |
| rs147941663 | 3 | 163575270 TTG           | 0  | 11 T  | 0.0001895     |
| rs9839357   | 3 | 167595780 G             | 14 | 32 A  | 0.0004925     |
| rs35997477  | 3 | 167595928 CT            | 13 | 31 C  | 0.0007049     |
| 3:173545424 | 3 | 173545424 TGTGTGTGTGTGT | 0  | 20 T  | 0.00000008134 |
| rs111562947 | 3 | 173824811 C             | 0  | 9 G   | 0.0009641     |
| rs73173113  | 3 | 177081452 C             | 36 | 9 T   | 0.00001822    |
| rs9861140   | 3 | 177085723 T             | 49 | 23 G  | 0.0005083     |
| rs9816839   | 3 | 178288166 G             | 31 | 9 A   | 0.0002572     |
| rs1477771   | 3 | 178289120 C             | 30 | 9 A   | 0.0004612     |
| rs7652236   | 3 | 178291198 G             | 32 | 9 A   | 0.0001413     |
| rs1382041   | 3 | 178291630 G             | 31 | 9 A   | 0.0002572     |
| rs6443547   | 3 | 178291847 T             | 30 | 9 G   | 0.0004612     |
| rs2863153   | 3 | 178294190 G             | 30 | 9 C   | 0.0004612     |
| rs4857779   | 3 | 178298623 C             | 30 | 9 G   | 0.0004612     |
| rs1477772   | 3 | 178300725 T             | 30 | 9 C   | 0.0004612     |
| rs4857651   | 3 | 178302776 G             | 30 | 9 C   | 0.0004612     |
| rs6443550   | 3 | 178304435 T             | 30 | 9 C   | 0.0004612     |
| rs6809859   | 3 | 178316530 G             | 29 | 9 A   | 0.0008145     |
| rs899077    | 3 | 178319839 C             | 29 | 9 T   | 0.0008145     |
| rs1903811   | 3 | 178320664 A             | 42 | 17 G  | 0.0003422     |
| rs931038    | 3 | 178320738 C             | 29 | 9 G   | 0.0008145     |
| rs931039    | 3 | 178320739 G             | 42 | 17 A  | 0.0003422     |
| rs1903812   | 3 | 178321446 T             | 42 | 17 C  | 0.0003422     |
| rs1477774   | 3 | 178321949 G             | 42 | 17 A  | 0.0003422     |
| rs1870979   | 3 | 178323513 T             | 42 | 17 G  | 0.0003422     |
| rs3930234   | 3 | 184216130 T             | 19 | 3 C   | 0.0005082     |
| rs11374679  | 3 | 184216166 T             | 22 | 4 TC  | 0.00043       |
| rs4912570   | 3 | 184216323 G             | 27 | 5 C   | 0.00005212    |
| rs11307534  | 3 | 184216381 CT            | 23 | 4 C   | 0.0002248     |
| rs4912571   | 3 | 184216615 T             | 23 | 4 C   | 0.0002248     |
| 3:185821419 | 3 | 185821419 A             | 7  | 23 C  | 0.0004919     |
| rs13060765  | 3 | 186701750 G             | 2  | 14 A  | 0.0009649     |
| rs13060784  | 3 | 186701791 G             | 2  | 14 A  | 0.0009649     |
| rs35846970  | 3 | 187170810 A             | 27 | 46 G  | 0.0005154     |
| rs7627192   | 3 | 187171467 A             | 26 | 45 G  | 0.0005028     |
| rs11721135  | 3 | 187172570 G             | 32 | 53 A  | 0.00009342    |
| rs2378240   | 3 | 187173607 G             | 27 | 46 A  | 0.0005154     |

|             |   |                |    |      |            |
|-------------|---|----------------|----|------|------------|
| rs9815313   | 3 | 187175707 T    | 31 | 52 C | 0.00009769 |
| rs9832985   | 3 | 187175819 A    | 31 | 52 G | 0.00009769 |
| rs6444231   | 3 | 187177911 C    | 31 | 52 T | 0.00009769 |
| rs6444232   | 3 | 187177932 C    | 31 | 52 T | 0.00009769 |
| rs9820758   | 3 | 187180014 C    | 27 | 46 G | 0.0005154  |
| rs9863882   | 3 | 187181082 A    | 31 | 52 C | 0.00009769 |
| rs9826615   | 3 | 187181103 G    | 31 | 52 A | 0.00009769 |
| rs9837025   | 3 | 187183233 C    | 31 | 52 G | 0.00009769 |
| rs9874793   | 3 | 187183283 A    | 31 | 52 G | 0.00009769 |
| rs7637660   | 3 | 187183328 T    | 31 | 52 G | 0.00009769 |
| rs36000570  | 3 | 187184628 TA   | 31 | 52 T | 0.00009769 |
| rs11711933  | 3 | 187184904 T    | 31 | 52 G | 0.00009769 |
| rs11707872  | 3 | 187184976 C    | 31 | 52 A | 0.00009769 |
| rs11712026  | 3 | 187185161 T    | 32 | 54 C | 0.00004651 |
| rs11707979  | 3 | 187185176 G    | 32 | 54 C | 0.00004651 |
| rs11707964  | 3 | 187185301 C    | 31 | 52 T | 0.00009769 |
| rs145406405 | 3 | 187185380 T    | 50 | 25 G | 0.0009811  |
| rs149858946 | 3 | 187185465 C    | 30 | 52 A | 0.00008196 |
| rs13071669  | 3 | 187185696 G    | 49 | 22 C | 0.0002673  |
| rs13071540  | 3 | 187185714 G    | 47 | 21 A | 0.000234   |
| rs13071675  | 3 | 187185745 G    | 45 | 20 A | 0.0003895  |
| rs13071695  | 3 | 187185791 G    | 47 | 21 A | 0.0001195  |
| rs13076367  | 3 | 187186031 A    | 31 | 53 G | 0.000049   |
| rs13077076  | 3 | 187186132 G    | 31 | 52 A | 0.00009769 |
| rs13076909  | 3 | 187186148 C    | 31 | 52 T | 0.00009769 |
| rs13077380  | 3 | 187186244 A    | 49 | 24 G | 0.000936   |
| rs13076957  | 3 | 187186246 G    | 49 | 24 A | 0.000936   |
| 3:187277304 | 3 | 187277304 T    | 32 | 10 C | 0.0005752  |
| rs35503915  | 3 | 188507075 TTTG | 7  | 22 T | 0.0009169  |
| rs34785844  | 3 | 188507474 A    | 7  | 22 T | 0.0009169  |
| rs1606789   | 3 | 189045487 T    | 1  | 17 C | 0.00001632 |
| rs73889196  | 3 | 189050749 G    | 1  | 17 T | 0.00001632 |
| rs113495037 | 3 | 189051167 A    | 1  | 13 C | 0.0003716  |
| rs1399614   | 3 | 189067066 G    | 3  | 18 C | 0.0002532  |
| rs62289698  | 3 | 189067220 G    | 3  | 18 A | 0.0002532  |
| rs146602352 | 3 | 189068374 TCA  | 3  | 17 T | 0.0002579  |
| rs200458285 | 3 | 189690826 AC   | 10 | 27 A | 0.0006898  |
| rs710578    | 3 | 189741453 C    | 11 | 28 G | 0.0008103  |
| rs1403416   | 3 | 189767199 T    | 13 | 35 C | 0.00003266 |
| rs1403417   | 3 | 189767472 A    | 13 | 35 G | 0.00003266 |
| 3:190280484 | 3 | 190280484 CAT  | 22 | 4 C  | 0.0004184  |

|             |   |             |    |         |           |
|-------------|---|-------------|----|---------|-----------|
| rs200759056 | 3 | 190280486 T | 22 | 3 C     | 0.0001254 |
| rs10804421  | 3 | 193721250 A | 43 | 18 G    | 0.0003905 |
| rs62288213  | 3 | 193723842 C | 40 | 15 T    | 0.0002535 |
| rs12487949  | 3 | 193726610 A | 46 | 20 G    | 0.0004155 |
| rs12487254  | 3 | 193727193 G | 47 | 20 C    | 0.0002308 |
| rs62288215  | 3 | 193727513 C | 47 | 20 A    | 0.0002308 |
| rs34144732  | 3 | 193727709 T | 47 | 20 C    | 0.0002308 |
| rs11715098  | 3 | 193727726 T | 47 | 20 A    | 0.0002308 |
| rs77882215  | 3 | 193727947 C | 49 | 24 CAGG | 0.000936  |
| rs11706230  | 3 | 193728852 A | 46 | 20 T    | 0.0004155 |
| rs4687496   | 3 | 193729225 T | 51 | 24 C    | 0.0003012 |
| rs62288220  | 3 | 193729836 C | 46 | 20 T    | 0.0004155 |
| rs62288221  | 3 | 193730075 A | 46 | 20 G    | 0.0004155 |
| rs9870522   | 3 | 193730758 G | 49 | 21 A    | 0.0001359 |
| rs9875031   | 3 | 193731258 G | 49 | 21 A    | 0.0001359 |
| rs9875036   | 3 | 193731262 G | 49 | 21 A    | 0.0001359 |
| rs56182048  | 3 | 193731569 A | 49 | 21 C    | 0.0001359 |
| rs56060318  | 3 | 193731844 T | 48 | 21 C    | 0.0002492 |
| rs56223959  | 3 | 193731858 T | 48 | 21 C    | 0.0002492 |
| rs56079000  | 3 | 193732010 A | 48 | 21 G    | 0.0002492 |
| rs1078811   | 3 | 193732779 C | 46 | 20 T    | 0.0004155 |
| rs1078813   | 3 | 193732819 C | 49 | 21 A    | 0.0001359 |
| rs1078814   | 3 | 193733031 C | 49 | 21 T    | 0.0001359 |
| rs2279511   | 3 | 193733343 C | 46 | 20 G    | 0.0004155 |
| rs2279512   | 3 | 193733393 T | 46 | 20 G    | 0.0004155 |
| rs56150153  | 3 | 193733404 C | 46 | 20 T    | 0.0004155 |
| rs4607052   | 3 | 193733890 T | 46 | 20 C    | 0.0004155 |
| rs4610173   | 3 | 193734054 G | 46 | 20 A    | 0.0004155 |
| rs4607053   | 3 | 193734072 T | 46 | 20 C    | 0.0004155 |
| rs4607054   | 3 | 193734094 G | 46 | 20 C    | 0.0004155 |
| rs4632490   | 3 | 193734206 G | 46 | 20 A    | 0.0004155 |
| rs4600776   | 3 | 193734280 G | 46 | 20 C    | 0.0004155 |
| rs62288224  | 3 | 193734681 G | 46 | 20 A    | 0.0004155 |
| rs6773898   | 3 | 197067697 C | 0  | 9 A     | 0.0009641 |
| rs6776479   | 3 | 197067712 C | 0  | 9 T     | 0.0009641 |
| rs73212319  | 3 | 197068925 C | 0  | 9 T     | 0.0009641 |
| rs10428227  | 3 | 197566540 A | 48 | 23 G    | 0.0008881 |
| rs2306439   | 3 | 197574936 C | 47 | 22 G    | 0.0008379 |
| rs9325410   | 3 | 197580938 C | 53 | 27 T    | 0.0006109 |
| rs12718052  | 3 | 197594521 A | 49 | 22 G    | 0.0002673 |
| rs13144661  | 4 | 3945627 T   | 10 | 27 C    | 0.0006386 |



|             |   |             |    |       |             |
|-------------|---|-------------|----|-------|-------------|
| rs2980177   | 4 | 4171615 C   | 16 | 36 T  | 0.0001978   |
| rs2980178   | 4 | 4171622 T   | 20 | 38 G  | 0.0009963   |
| rs2916386   | 4 | 4171624 G   | 20 | 38 A  | 0.0009963   |
| rs2980210   | 4 | 4174141 T   | 32 | 51 G  | 0.0003437   |
| rs4689202   | 4 | 4175894 G   | 33 | 6 A   | 0.000002794 |
| rs34485304  | 4 | 4175938 A   | 19 | 37 G  | 0.0004873   |
| rs3097979   | 4 | 4201105 C   | 39 | 16 A  | 0.0009032   |
| rs3097980   | 4 | 4201116 G   | 39 | 16 T  | 0.0009032   |
| rs2916417   | 4 | 4202389 A   | 39 | 15 T  | 0.000769    |
| rs2916422   | 4 | 4206953 A   | 23 | 44 G  | 0.0001337   |
| rs7666381   | 4 | 4210460 C   | 22 | 44 G  | 0.00006674  |
| rs34634401  | 4 | 4216238 C   | 17 | 35 T  | 0.0007327   |
| rs34096660  | 4 | 4216258 C   | 17 | 36 T  | 0.0004114   |
| rs13111344  | 4 | 4216578 T   | 17 | 36 C  | 0.0004114   |
| rs13112949  | 4 | 4217277 T   | 17 | 36 C  | 0.0004114   |
| rs13130968  | 4 | 4218502 C   | 18 | 36 A  | 0.0008188   |
| rs13150671  | 4 | 5206154 T   | 37 | 14 G  | 0.0006739   |
| rs62297683  | 4 | 5804878 G   | 8  | 26 A  | 0.0001919   |
| rs62297684  | 4 | 5806712 T   | 7  | 22 G  | 0.0009169   |
| rs62297707  | 4 | 5813512 C   | 6  | 22 T  | 0.0007374   |
| rs10461053  | 4 | 6031632 G   | 15 | 33 T  | 0.0005689   |
| rs17765384  | 4 | 6032235 A   | 11 | 29 G  | 0.0004498   |
| rs7438838   | 4 | 6058732 T   | 11 | 29 C  | 0.0004498   |
| rs17766335  | 4 | 6068267 T   | 13 | 30 C  | 0.0007578   |
| rs11731133  | 4 | 6068495 T   | 13 | 32 C  | 0.0002287   |
| rs28496717  | 4 | 8638873 G   | 17 | 35 A  | 0.0007327   |
| rs28440053  | 4 | 8638924 C   | 17 | 35 T  | 0.0007327   |
| 4:9033194   | 4 | 9033194 ACG | 34 | 5 A   | 0.000002723 |
| 4:9033196   | 4 | 9033196 G   | 33 | 6 A   | 0.000002794 |
| rs887925    | 4 | 13833161 C  | 0  | 9 T   | 0.0009641   |
| rs142176733 | 4 | 16248336 G  | 22 | 4 T   | 0.00043     |
| rs6448409   | 4 | 25846377 C  | 6  | 21 A  | 0.0006518   |
| rs35758792  | 4 | 38961597 C  | 19 | 41 CT | 0.00008368  |
| 4:40273934  | 4 | 40273934 T  | 0  | 9 TA  | 0.0009641   |
| 4:40273936  | 4 | 40273936 C  | 0  | 9 A   | 0.0009641   |
| rs13104844  | 4 | 42500835 G  | 51 | 25 T  | 0.0005636   |
| rs13148916  | 4 | 42507023 A  | 52 | 24 T  | 0.0001653   |
| rs13139149  | 4 | 42510813 C  | 52 | 26 T  | 0.0005884   |
| rs12650104  | 4 | 42511212 G  | 52 | 26 A  | 0.0005884   |
| rs12651087  | 4 | 42512619 G  | 52 | 26 A  | 0.0005884   |
| rs13353762  | 4 | 42519515 A  | 51 | 25 C  | 0.0005636   |

|             |   |             |    |         |            |
|-------------|---|-------------|----|---------|------------|
| rs13143829  | 4 | 42523909 C  | 52 | 26 T    | 0.0005884  |
| rs12649944  | 4 | 42527333 C  | 52 | 25 G    | 0.0003167  |
| rs71648734  | 4 | 42528232 C  | 52 | 25 CCTT | 0.0003167  |
| rs5024243   | 4 | 42528369 C  | 52 | 25 A    | 0.0003167  |
| rs35722201  | 4 | 42530697 A  | 52 | 25 G    | 0.0003167  |
| rs4861033   | 4 | 42539281 C  | 52 | 25 T    | 0.0003167  |
| rs62302266  | 4 | 42542341 A  | 52 | 25 G    | 0.0003167  |
| rs10461060  | 4 | 42547450 G  | 52 | 25 T    | 0.0003167  |
| rs12645297  | 4 | 42554363 C  | 50 | 25 T    | 0.0009811  |
| rs4328946   | 4 | 42554984 T  | 50 | 25 G    | 0.0009811  |
| rs10805104  | 4 | 42556540 T  | 50 | 25 C    | 0.0009811  |
| rs13133445  | 4 | 42556776 T  | 50 | 25 C    | 0.0009811  |
| rs13108456  | 4 | 42556881 G  | 50 | 25 A    | 0.0009811  |
| rs13119526  | 4 | 42557045 C  | 50 | 25 T    | 0.0009811  |
| rs7666279   | 4 | 42557555 C  | 50 | 25 A    | 0.0009811  |
| rs7671271   | 4 | 42557627 G  | 50 | 25 T    | 0.0009811  |
| rs7666734   | 4 | 42557817 G  | 50 | 25 A    | 0.0009811  |
| rs114935572 | 4 | 43378946 C  | 0  | 9 A     | 0.0009641  |
| rs76788362  | 4 | 49185593 A  | 12 | 0 C     | 0.0003752  |
| 4:49316327  | 4 | 49316327 G  | 11 | 0 C     | 0.0007855  |
| 4:49630742  | 4 | 49630742 T  | 14 | 1 C     | 0.0007094  |
| rs2616405   | 4 | 54589232 T  | 52 | 26 A    | 0.0005884  |
| rs2590827   | 4 | 54589337 G  | 52 | 26 A    | 0.0005884  |
| rs2590829   | 4 | 54590029 G  | 32 | 50 C    | 0.0009655  |
| rs9759545   | 4 | 54606083 C  | 52 | 26 A    | 0.0005884  |
| rs2590763   | 4 | 54613453 C  | 50 | 23 T    | 0.0002847  |
| rs2616434   | 4 | 54616649 G  | 52 | 22 A    | 0.00004088 |
| rs2616433   | 4 | 54617199 A  | 50 | 22 C    | 0.0001461  |
| rs5858236   | 4 | 54617655 C  | 49 | 21 CA   | 0.0001359  |
| rs2616431   | 4 | 54618315 C  | 51 | 22 G    | 0.00007816 |
| rs2412448   | 4 | 54620401 A  | 45 | 20 C    | 0.0007326  |
| rs2590807   | 4 | 54621567 A  | 52 | 22 T    | 0.00004088 |
| rs6826915   | 4 | 54622017 A  | 52 | 22 G    | 0.00004088 |
| rs6815433   | 4 | 54622219 C  | 40 | 16 T    | 0.0005221  |
| rs59481386  | 4 | 54625401 G  | 45 | 20 T    | 0.0007326  |
| rs6842780   | 4 | 54626228 C  | 45 | 20 T    | 0.0007326  |
| rs7655896   | 4 | 54626897 A  | 45 | 20 G    | 0.0007326  |
| rs6828755   | 4 | 54637552 G  | 50 | 22 A    | 0.0001461  |
| rs4292386   | 4 | 54642592 T  | 49 | 23 C    | 0.0005083  |
| rs5858241   | 4 | 54644872 AT | 50 | 22 A    | 0.0001461  |
| rs7694601   | 4 | 54645684 C  | 50 | 22 T    | 0.0001461  |

|             |   |             |    |               |            |
|-------------|---|-------------|----|---------------|------------|
| rs4864488   | 4 | 54646237 C  | 50 | 22 A          | 0.0001461  |
| rs4864820   | 4 | 54646492 T  | 50 | 22 C          | 0.0001461  |
| rs1498830   | 4 | 54647761 G  | 50 | 22 A          | 0.0001461  |
| rs904414    | 4 | 54648902 G  | 52 | 26 C          | 0.0005884  |
| rs7378471   | 4 | 54652137 G  | 48 | 21 A          | 0.0002492  |
| rs2088582   | 4 | 54653803 C  | 48 | 21 T          | 0.0002492  |
| rs1718824   | 4 | 57903747 A  | 11 | 32 C          | 0.00006919 |
| rs1277313   | 4 | 57903948 T  | 11 | 32 G          | 0.00006919 |
| rs6839014   | 4 | 57911929 G  | 14 | 32 A          | 0.0004925  |
| rs12642538  | 4 | 57914318 T  | 14 | 32 C          | 0.0004925  |
| rs13145672  | 4 | 57917126 C  | 14 | 31 G          | 0.0008795  |
| 4:68012780  | 4 | 68012780 C  | 34 | 10 CAG        | 0.0001587  |
| rs1220858   | 4 | 70805831 T  | 42 | 18 A          | 0.0006782  |
| 4:82709303  | 4 | 82709303 G  | 13 | 0 GTATATATACA | 0.0001973  |
| 4:84610390  | 4 | 84610390 T  | 37 | 14 TG         | 0.0006739  |
| rs34736493  | 4 | 89746367 A  | 50 | 23 AT         | 0.000426   |
| rs1513815   | 4 | 90099668 C  | 16 | 2 A           | 0.0008956  |
| rs34952537  | 4 | 90112103 G  | 17 | 2 A           | 0.000467   |
| rs71609558  | 4 | 90267765 A  | 0  | 10 G          | 0.0004292  |
| rs4441725   | 4 | 94082392 C  | 43 | 19 A          | 0.000761   |
| rs1393804   | 4 | 94084099 C  | 43 | 19 A          | 0.000761   |
| rs144710773 | 4 | 94084638 G  | 43 | 19 C          | 0.0006329  |
| rs1371358   | 4 | 94585894 C  | 15 | 33 A          | 0.0005689  |
| 4:99749755  | 4 | 99749755 G  | 4  | 19 GA         | 0.0004818  |
| rs3804357   | 4 | 102002123 A | 16 | 34 C          | 0.0006492  |
| rs17030740  | 4 | 102006277 C | 16 | 34 T          | 0.0006492  |
| rs62329749  | 4 | 105811657 T | 16 | 2 C           | 0.0008956  |
| rs62329754  | 4 | 105827355 A | 16 | 2 G           | 0.0008956  |
| 4:109041155 | 4 | 109041155 T | 10 | 32 G          | 0.00002619 |
| rs1126483   | 4 | 111409705 T | 22 | 46 C          | 0.00001707 |
| rs6833731   | 4 | 111410482 A | 12 | 31 G          | 0.0001903  |
| rs12503640  | 4 | 111412833 T | 22 | 45 A          | 0.00003418 |
| rs2348427   | 4 | 111414399 T | 22 | 45 C          | 0.00003418 |
| rs2881913   | 4 | 111416282 A | 22 | 45 C          | 0.00003418 |
| rs2348428   | 4 | 111418528 A | 22 | 45 T          | 0.00003418 |
| rs2348429   | 4 | 111418774 G | 22 | 45 A          | 0.00003418 |
| rs17551888  | 4 | 111419056 T | 22 | 45 C          | 0.00003418 |
| rs5861009   | 4 | 111419509 C | 22 | 45 CA         | 0.00003418 |
| rs6842486   | 4 | 111420283 T | 22 | 46 A          | 0.00001707 |
| rs11938659  | 4 | 111423314 A | 12 | 31 G          | 0.0001903  |
| rs2348430   | 4 | 111424096 G | 22 | 45 A          | 0.00003418 |

|             |   |              |    |        |             |
|-------------|---|--------------|----|--------|-------------|
| rs6821205   | 4 | 111424198 C  | 12 | 31 T   | 0.0001903   |
| rs9992936   | 4 | 111424307 A  | 22 | 45 G   | 0.00003418  |
| rs10015807  | 4 | 111424391 G  | 22 | 45 C   | 0.00003418  |
| rs12506732  | 4 | 111424431 G  | 22 | 46 A   | 0.00001707  |
| rs6844746   | 4 | 111424598 G  | 12 | 31 A   | 0.0001903   |
| rs2348431   | 4 | 111424767 C  | 22 | 45 A   | 0.00003418  |
| rs11731078  | 4 | 111426341 C  | 12 | 31 T   | 0.0001903   |
| rs9998275   | 4 | 111431182 G  | 12 | 31 A   | 0.0001903   |
| rs6813802   | 4 | 111432041 C  | 22 | 45 T   | 0.00003418  |
| rs10024396  | 4 | 111432708 G  | 12 | 31 C   | 0.0001903   |
| rs10024670  | 4 | 111432841 A  | 12 | 31 G   | 0.0001903   |
| rs10024679  | 4 | 111432854 A  | 12 | 31 G   | 0.0001903   |
| rs10027031  | 4 | 111433076 T  | 12 | 31 C   | 0.0001903   |
| rs13134674  | 4 | 111433217 A  | 12 | 31 G   | 0.0001903   |
| rs3796889   | 4 | 111435409 T  | 22 | 45 A   | 0.00003418  |
| rs3796888   | 4 | 111435434 T  | 22 | 45 C   | 0.00003418  |
| rs11406861  | 4 | 111435856 T  | 22 | 45 TG  | 0.00003418  |
| rs2348433   | 4 | 111437127 A  | 22 | 45 C   | 0.00003418  |
| rs1996604   | 4 | 111438359 G  | 22 | 45 A   | 0.00003418  |
| rs11735606  | 4 | 111439018 G  | 12 | 31 C   | 0.0001903   |
| rs7669705   | 4 | 111439486 T  | 12 | 31 G   | 0.0001903   |
| rs1448808   | 4 | 111445587 A  | 23 | 48 G   | 0.000008737 |
| rs9993086   | 4 | 111447259 G  | 14 | 32 C   | 0.0004925   |
| rs639194    | 4 | 111450323 C  | 14 | 33 T   | 0.0002703   |
| rs522426    | 4 | 111450537 C  | 14 | 33 T   | 0.0002703   |
| rs6823156   | 4 | 111451028 A  | 14 | 33 G   | 0.0002703   |
| rs35782762  | 4 | 111451075 C  | 15 | 33 CA  | 0.0005689   |
| rs55704506  | 4 | 111451237 G  | 14 | 33 GA  | 0.0004679   |
| rs1375298   | 4 | 111453751 A  | 24 | 48 G   | 0.0000187   |
| rs28447570  | 4 | 111456923 A  | 13 | 31 G   | 0.0004205   |
| rs12331296  | 4 | 113255293 G  | 16 | 35 A   | 0.000362    |
| rs13144272  | 4 | 113309794 C  | 23 | 44 A   | 0.0006722   |
| 4:114222536 | 4 | 114222536 T  | 5  | 24 C   | 0.00002717  |
| rs58515333  | 4 | 114242449 C  | 1  | 13 CAT | 0.0003716   |
| rs77771853  | 4 | 118223667 C  | 16 | 2 T    | 0.0008956   |
| rs115597384 | 4 | 118224725 G  | 16 | 2 T    | 0.0008956   |
| rs72914164  | 4 | 118238440 G  | 16 | 2 A    | 0.0008956   |
| rs143741879 | 4 | 118241384 AC | 16 | 2 A    | 0.0008956   |
| rs72914172  | 4 | 118244899 A  | 16 | 2 G    | 0.0008956   |
| rs17861758  | 4 | 118254457 A  | 16 | 2 G    | 0.0008956   |
| rs80129590  | 4 | 118255352 T  | 16 | 2 C    | 0.0008956   |

|             |   |              |    |         |            |
|-------------|---|--------------|----|---------|------------|
| rs144775364 | 4 | 118259719 CT | 16 | 2 C     | 0.0008956  |
| rs6820085   | 4 | 118259780 A  | 16 | 2 G     | 0.0008956  |
| rs6824651   | 4 | 118259951 G  | 16 | 2 C     | 0.0008956  |
| rs148569473 | 4 | 118264325 C  | 16 | 2 CA    | 0.0008956  |
| rs72344381  | 4 | 118287512 T  | 16 | 2 TTCTC | 0.0008956  |
| rs17861809  | 4 | 118292890 T  | 16 | 2 C     | 0.0008956  |
| rs17861813  | 4 | 118294536 C  | 16 | 2 G     | 0.0008956  |
| rs17861840  | 4 | 118310450 T  | 16 | 2 G     | 0.0008956  |
| rs62313510  | 4 | 118313326 A  | 16 | 2 G     | 0.0008956  |
| rs13132223  | 4 | 118316992 C  | 16 | 2 G     | 0.0008956  |
| rs17861874  | 4 | 118328706 G  | 16 | 2 A     | 0.0008956  |
| rs150600712 | 4 | 118332190 AT | 16 | 2 A     | 0.0008956  |
| rs13114404  | 4 | 118334362 G  | 16 | 2 A     | 0.0008956  |
| rs17861904  | 4 | 118354621 C  | 16 | 2 T     | 0.0008956  |
| 4:118438369 | 4 | 118438369 C  | 12 | 0 T     | 0.0004093  |
| rs58125305  | 4 | 120045373 GA | 10 | 27 G    | 0.0006386  |
| rs7695544   | 4 | 120741242 A  | 30 | 9 G     | 0.0004612  |
| rs75842627  | 4 | 120745179 T  | 30 | 9 TG    | 0.0004612  |
| rs35367572  | 4 | 120747061 A  | 29 | 9 G     | 0.0008145  |
| rs34269004  | 4 | 120747293 C  | 29 | 9 G     | 0.0008145  |
| rs12509043  | 4 | 120747574 T  | 29 | 9 C     | 0.0008145  |
| rs11098543  | 4 | 120748542 G  | 32 | 9 A     | 0.0001413  |
| rs11737790  | 4 | 120751664 T  | 32 | 9 C     | 0.0001413  |
| rs4834817   | 4 | 120752566 C  | 33 | 9 T     | 0.00007642 |
| rs6534157   | 4 | 120753056 G  | 32 | 9 C     | 0.0001413  |
| rs6858155   | 4 | 120754216 T  | 32 | 9 G     | 0.0001413  |
| rs72682879  | 4 | 120754392 G  | 32 | 9 T     | 0.0001413  |
| rs2389919   | 4 | 120756095 G  | 32 | 9 A     | 0.0001413  |
| rs17363983  | 4 | 120756608 G  | 32 | 9 T     | 0.0001413  |
| rs6856904   | 4 | 120759579 A  | 29 | 9 G     | 0.0008145  |
| rs6822154   | 4 | 120761791 A  | 30 | 9 C     | 0.0004612  |
| rs6822164   | 4 | 120761806 G  | 30 | 9 C     | 0.0004612  |
| rs62319692  | 4 | 120763615 T  | 29 | 8 G     | 0.0003391  |
| rs12374391  | 4 | 120766947 G  | 29 | 9 A     | 0.0008145  |
| rs1587736   | 4 | 120772766 T  | 30 | 9 G     | 0.0004612  |
| rs1910423   | 4 | 120777023 C  | 32 | 9 T     | 0.0001413  |
| rs34463615  | 4 | 120784702 G  | 32 | 9 C     | 0.0001413  |
| rs34021877  | 4 | 120784708 C  | 32 | 9 T     | 0.0001413  |
| rs35229169  | 4 | 120787593 C  | 32 | 9 A     | 0.0001413  |
| rs1818167   | 4 | 120790884 C  | 29 | 9 T     | 0.0008145  |
| rs4254800   | 4 | 122378732 G  | 7  | 23 A    | 0.0004919  |

|             |   |                   |    |          |            |
|-------------|---|-------------------|----|----------|------------|
| rs376830774 | 4 | 124487236 A       | 40 | 16 ATCTG | 0.0005221  |
| rs1872296   | 4 | 143231657 A       | 2  | 14 T     | 0.0009649  |
| rs35157240  | 4 | 143233592 A       | 2  | 14 G     | 0.0009649  |
| rs35298298  | 4 | 143234244 T       | 2  | 14 G     | 0.0009649  |
| rs10013303  | 4 | 143234542 G       | 2  | 14 C     | 0.0009649  |
| rs10034842  | 4 | 143234609 C       | 2  | 14 G     | 0.0009649  |
| rs10024947  | 4 | 143234663 G       | 2  | 14 A     | 0.0009649  |
| rs10025044  | 4 | 143234754 G       | 2  | 14 A     | 0.0009649  |
| rs16998530  | 4 | 143235258 A       | 2  | 14 G     | 0.0009649  |
| rs3756121   | 4 | 143235344 A       | 2  | 14 G     | 0.0009649  |
| rs11945996  | 4 | 143235721 C       | 2  | 15 T     | 0.0004755  |
| rs6811427   | 4 | 143236750 T       | 2  | 14 C     | 0.0009649  |
| rs6858661   | 4 | 143236897 A       | 2  | 14 G     | 0.0009649  |
| rs6812034   | 4 | 143237043 T       | 2  | 14 C     | 0.0009649  |
| rs6816219   | 4 | 143237530 C       | 2  | 14 G     | 0.0009649  |
| rs6817826   | 4 | 143237539 T       | 2  | 14 C     | 0.0009649  |
| rs6847957   | 4 | 143237568 G       | 2  | 14 T     | 0.0009649  |
| rs62328283  | 4 | 143237903 A       | 2  | 14 G     | 0.0009649  |
| rs6850050   | 4 | 143238764 G       | 2  | 15 A     | 0.0004755  |
| rs9654253   | 4 | 143239277 T       | 2  | 15 A     | 0.0004755  |
| rs17015920  | 4 | 143240651 C       | 2  | 15 T     | 0.0004755  |
| rs62328284  | 4 | 143241936 G       | 2  | 15 A     | 0.0004755  |
| rs62328285  | 4 | 143242074 C       | 2  | 15 T     | 0.0004755  |
| rs10519642  | 4 | 143243150 G       | 2  | 14 A     | 0.0009649  |
| rs200309497 | 4 | 147248072 AGT     | 12 | 33 A     | 0.00005204 |
| rs147593266 | 4 | 153449012 TTA     | 5  | 21 T     | 0.0002243  |
| rs6535901   | 4 | 154093408 C       | 31 | 50 T     | 0.0005409  |
| rs6820726   | 4 | 154093464 T       | 31 | 51 C     | 0.0002959  |
| rs10023596  | 4 | 154094001 G       | 32 | 51 A     | 0.0003437  |
| rs11099874  | 4 | 154094107 C       | 31 | 51 G     | 0.0002959  |
| rs11099875  | 4 | 154094109 C       | 31 | 51 G     | 0.0002959  |
| rs11099876  | 4 | 154094235 G       | 31 | 51 C     | 0.0002959  |
| rs10002011  | 4 | 154094675 A       | 30 | 51 G     | 0.0001576  |
| rs10001881  | 4 | 154094682 T       | 30 | 51 C     | 0.0001576  |
| rs7671132   | 4 | 154094793 T       | 31 | 51 C     | 0.0002959  |
| rs7696186   | 4 | 154095073 C       | 31 | 51 T     | 0.0002959  |
| rs142792673 | 4 | 154096164 GTTTTGT | 52 | 25 G     | 0.00007927 |
| rs75572337  | 4 | 156985219 G       | 1  | 12 A     | 0.0007887  |
| rs75082465  | 4 | 162686966 T       | 0  | 10 G     | 0.0004197  |
| rs200385614 | 4 | 164804411 A       | 9  | 31 G     | 0.00001851 |
| rs200908737 | 4 | 164804412 T       | 9  | 31 A     | 0.00001851 |

|             |   |                   |    |                 |            |
|-------------|---|-------------------|----|-----------------|------------|
| 4:164896322 | 4 | 164896322 T       | 49 | 21 G            | 0.000236   |
| rs1246928   | 4 | 166543688 G       | 19 | 3 T             | 0.0005082  |
| rs1246927   | 4 | 166543852 C       | 39 | 12 T            | 0.00004106 |
| rs56327210  | 4 | 166716974 T       | 47 | 22 C            | 0.0008379  |
| rs3046194   | 4 | 166721228 ATAATAT | 47 | 22 A            | 0.0008379  |
| rs7683920   | 4 | 166750173 C       | 40 | 16 T            | 0.0005221  |
| rs7654317   | 4 | 166750528 A       | 40 | 16 T            | 0.0005221  |
| rs1460065   | 4 | 166750991 A       | 40 | 16 G            | 0.0005221  |
| rs78076428  | 4 | 169546661 G       | 20 | 3 T             | 0.0005154  |
| rs57853587  | 4 | 170291277 CT      | 23 | 5 C             | 0.0007245  |
| rs112092862 | 4 | 175405570 A       | 0  | 9 G             | 0.0009641  |
| rs112529026 | 4 | 175405838 C       | 0  | 9 CAGG          | 0.0009641  |
| rs13145311  | 4 | 187022823 C       | 52 | 25 T            | 0.0003167  |
| rs10564187  | 4 | 187022827 T       | 6  | 21 TA           | 0.0006518  |
| 4:187284255 | 4 | 187284255 A       | 0  | 9 C             | 0.0009641  |
| rs72629660  | 4 | 187687317 A       | 1  | 12 G            | 0.0007887  |
| rs79858754  | 4 | 189972171 A       | 1  | 12 G            | 0.0007119  |
| rs55809797  | 4 | 189995776 A       | 6  | 21 G            | 0.0006518  |
| rs74799204  | 4 | 190024436 A       | 1  | 15 C            | 0.00007965 |
| rs1566102   | 4 | 190025016 G       | 17 | 35 T            | 0.0007327  |
| 4:190913846 | 4 | 190913846 T       | 11 | 0 C             | 0.0007855  |
| rs35028140  | 5 | 2077343 G         | 25 | 43 GAA          | 0.0008649  |
| rs111133927 | 5 | 2077356 T         | 25 | 43 G            | 0.0008649  |
| rs10866530  | 5 | 2077580 T         | 25 | 43 C            | 0.0008649  |
| rs10866531  | 5 | 2077739 T         | 25 | 43 G            | 0.0008649  |
| rs465950    | 5 | 2354762 C         | 18 | 3 T             | 0.0009486  |
| rs460672    | 5 | 2355032 G         | 17 | 2 C             | 0.000467   |
| rs462906    | 5 | 2355389 T         | 16 | 2 C             | 0.0008956  |
| rs113602711 | 5 | 2355658 T         | 16 | 2 TATGCTAATGTCA | 0.0008956  |
| rs58937979  | 5 | 2355682 T         | 16 | 2 C             | 0.0008956  |
| rs2641215   | 5 | 2355878 T         | 16 | 2 G             | 0.0008956  |
| rs456732    | 5 | 2358645 G         | 16 | 2 A             | 0.0008956  |
| rs7356684   | 5 | 2661836 A         | 26 | 5 C             | 0.0001012  |
| rs6896765   | 5 | 3424724 T         | 6  | 21 C            | 0.0006518  |
| rs13186531  | 5 | 3660262 A         | 19 | 1 G             | 0.00001507 |
| rs13187667  | 5 | 3660269 T         | 16 | 1 C             | 0.0001772  |
| rs67486607  | 5 | 3895075 G         | 0  | 9 A             | 0.0009641  |
| rs12653733  | 5 | 5433611 T         | 24 | 43 C            | 0.000471   |
| rs78139414  | 5 | 18375453 A        | 2  | 14 G            | 0.0009649  |
| rs200432192 | 5 | 19163455 T        | 21 | 4 C             | 0.0008104  |
| rs192918603 | 5 | 19166903 G        | 29 | 9 T             | 0.0008145  |

|             |   |              |    |                 |            |
|-------------|---|--------------|----|-----------------|------------|
| rs10941087  | 5 | 19171347 A   | 29 | 9 G             | 0.0008145  |
| rs4546383   | 5 | 19174117 T   | 29 | 9 G             | 0.0008145  |
| rs56127401  | 5 | 19175816 G   | 29 | 9 A             | 0.0008145  |
| rs11954805  | 5 | 19179319 C   | 29 | 9 T             | 0.0008145  |
| rs67595693  | 5 | 19181373 C   | 29 | 9 T             | 0.0008145  |
| rs56010419  | 5 | 19181660 C   | 29 | 9 T             | 0.0008145  |
| rs28753870  | 5 | 19183204 G   | 29 | 9 T             | 0.0008145  |
| rs10461927  | 5 | 19183422 C   | 29 | 9 T             | 0.0008145  |
| rs67749574  | 5 | 19184078 C   | 29 | 9 T             | 0.0008145  |
| rs4492113   | 5 | 19185179 C   | 29 | 9 A             | 0.0008145  |
| rs10461707  | 5 | 19185427 T   | 29 | 9 A             | 0.0008145  |
| rs10055960  | 5 | 19185900 A   | 29 | 9 G             | 0.0008145  |
| rs10056045  | 5 | 19186087 C   | 29 | 9 G             | 0.0008145  |
| rs35630947  | 5 | 19186390 G   | 29 | 9 GA            | 0.0008145  |
| rs4409093   | 5 | 19186620 T   | 29 | 9 C             | 0.0008145  |
| rs10073850  | 5 | 19187322 T   | 29 | 9 C             | 0.0008145  |
| rs143565175 | 5 | 19187627 G   | 30 | 9 C             | 0.0004612  |
| rs1512548   | 5 | 19399602 T   | 21 | 4 C             | 0.0008104  |
| rs5866397   | 5 | 19742516 TAC | 27 | 45 T            | 0.0009136  |
| rs10068995  | 5 | 19800575 C   | 28 | 46 T            | 0.0009321  |
| rs5024079   | 5 | 19808438 A   | 24 | 43 C            | 0.000471   |
| rs34820291  | 5 | 19837916 CA  | 29 | 47 C            | 0.0009467  |
| rs6451918   | 5 | 20909303 G   | 27 | 46 T            | 0.0005154  |
| rs184303633 | 5 | 21357168 C   | 11 | 0 G             | 0.000738   |
| rs2174436   | 5 | 31920019 A   | 3  | 17 G            | 0.0005045  |
| 5:35548420  | 5 | 35548420 C   | 20 | 41 T            | 0.0001748  |
| rs10941321  | 5 | 37213350 C   | 31 | 10 A            | 0.0006062  |
| rs76348379  | 5 | 37901402 T   | 13 | 0 C             | 0.0001783  |
| rs76564102  | 5 | 37903568 A   | 12 | 0 C             | 0.0003752  |
| rs2973080   | 5 | 37906865 G   | 39 | 15 A            | 0.0004501  |
| rs6874732   | 5 | 38105437 C   | 1  | 12 T            | 0.0007887  |
| rs7715558   | 5 | 38105838 C   | 1  | 12 T            | 0.0007887  |
| rs11346399  | 5 | 49624292 G   | 29 | 9 GA            | 0.0008145  |
| rs7702276   | 5 | 51805742 T   | 17 | 35 C            | 0.0007327  |
| rs75510999  | 5 | 52940660 A   | 0  | 9 G             | 0.0009641  |
| rs116611286 | 5 | 53040709 G   | 0  | 9 A             | 0.0009641  |
| rs6878995   | 5 | 54976056 T   | 0  | 10 G            | 0.0004292  |
| 5:57402182  | 5 | 57402182 A   | 10 | 32 G            | 0.00002619 |
| rs140681291 | 5 | 58464504 A   | 1  | 12 AAGAG        | 0.0007887  |
| 5:58496527  | 5 | 58496527 A   | 0  | 9 ATAGATACACGTA | 0.000946   |
| rs147324646 | 5 | 59812601 AT  | 22 | 4 A             | 0.00043    |



|             |   |             |    |                |            |
|-------------|---|-------------|----|----------------|------------|
| rs35856431  | 5 | 59815431 GA | 21 | 4 G            | 0.0008104  |
| rs10075757  | 5 | 59815534 C  | 21 | 4 T            | 0.0008104  |
| rs10065640  | 5 | 59821598 G  | 21 | 4 A            | 0.0008104  |
| rs7727343   | 5 | 59823198 C  | 21 | 4 T            | 0.0008104  |
| rs7712117   | 5 | 59823870 C  | 21 | 4 A            | 0.0008104  |
| rs112450883 | 5 | 59826635 C  | 21 | 4 T            | 0.0008104  |
| rs3857235   | 5 | 59830539 G  | 21 | 4 A            | 0.0008104  |
| rs6891919   | 5 | 59832376 C  | 21 | 4 A            | 0.0008104  |
| rs6898521   | 5 | 59833943 C  | 21 | 4 A            | 0.0008104  |
| rs6449475   | 5 | 59834261 T  | 21 | 4 C            | 0.0008104  |
| rs7724442   | 5 | 59834603 A  | 21 | 4 T            | 0.0008104  |
| rs9291692   | 5 | 59835549 G  | 21 | 4 A            | 0.0008104  |
| rs6870200   | 5 | 61405556 C  | 29 | 9 T            | 0.0008145  |
| rs6449583   | 5 | 61408033 C  | 27 | 6 A            | 0.0001606  |
| rs10471534  | 5 | 61414874 A  | 27 | 6 G            | 0.0001606  |
| rs35311635  | 5 | 61415810 A  | 27 | 6 C            | 0.0001606  |
| rs7721209   | 5 | 61416428 A  | 27 | 6 G            | 0.0001606  |
| rs3899770   | 5 | 61416926 A  | 27 | 6 G            | 0.0001606  |
| rs9291748   | 5 | 61418667 T  | 20 | 1 C            | 0.00009945 |
| rs7719350   | 5 | 61419458 G  | 27 | 6 T            | 0.0001606  |
| rs13356167  | 5 | 61420029 C  | 27 | 6 T            | 0.0001606  |
| rs7704609   | 5 | 61420501 G  | 27 | 6 A            | 0.0001606  |
| rs1363785   | 5 | 61428613 C  | 27 | 6 T            | 0.0001606  |
| rs7722122   | 5 | 61439524 T  | 27 | 5 G            | 0.00005212 |
| rs71631929  | 5 | 61446349 T  | 20 | 1 C            | 0.00009945 |
| rs201535035 | 5 | 61451674 G  | 18 | 1 GA           | 0.00004271 |
| rs376091358 | 5 | 61451676 T  | 18 | 1 G            | 0.00004271 |
| rs1833800   | 5 | 61453396 A  | 28 | 6 G            | 0.00008463 |
| rs6876952   | 5 | 61459698 C  | 27 | 6 T            | 0.0001606  |
| rs6878813   | 5 | 61463949 T  | 20 | 1 C            | 0.00009945 |
| rs401016    | 5 | 67316364 C  | 11 | 28 A           | 0.0008103  |
| rs62357186  | 5 | 73432081 T  | 23 | 5 G            | 0.0006807  |
| rs12187319  | 5 | 73433727 G  | 24 | 5 A            | 0.0003659  |
| rs11744466  | 5 | 73438529 A  | 24 | 5 G            | 0.0003659  |
| rs11738090  | 5 | 73438540 T  | 24 | 5 C            | 0.0003659  |
| rs9293620   | 5 | 73441891 G  | 33 | 11 C           | 0.0006951  |
| rs12188714  | 5 | 73450440 G  | 24 | 4 A            | 0.0001159  |
| rs62357188  | 5 | 73454385 C  | 17 | 1 T            | 0.00008737 |
| rs138284024 | 5 | 73454807 AT | 17 | 1 A            | 0.00008737 |
| 5:73455588  | 5 | 73455588 G  | 16 | 1 GAGAGAGAGAGA | 0.0001772  |
| rs62357189  | 5 | 73455804 A  | 17 | 1 G            | 0.00008737 |

|             |   |                      |    |       |            |
|-------------|---|----------------------|----|-------|------------|
| rs72776364  | 5 | 73456113 C           | 24 | 4 G   | 0.0001159  |
| rs62357204  | 5 | 73457335 A           | 17 | 1 G   | 0.00008737 |
| rs62357205  | 5 | 73458233 T           | 17 | 1 C   | 0.00008737 |
| rs62357206  | 5 | 73458276 T           | 17 | 1 A   | 0.00008737 |
| rs62357207  | 5 | 73458728 C           | 17 | 1 T   | 0.00008737 |
| rs975949    | 5 | 73460035 T           | 17 | 1 C   | 0.00008737 |
| rs76802708  | 5 | 73460555 G           | 17 | 1 A   | 0.00008737 |
| rs76299023  | 5 | 73460579 T           | 17 | 1 A   | 0.00008737 |
| rs77089651  | 5 | 73460581 T           | 17 | 1 C   | 0.00008737 |
| rs17637176  | 5 | 73460633 A           | 17 | 1 T   | 0.00008737 |
| rs62357208  | 5 | 73464335 T           | 24 | 4 C   | 0.0001159  |
| rs72776367  | 5 | 73467836 T           | 24 | 4 C   | 0.0001159  |
| 5:75248077  | 5 | 75248077 TTCCG       | 0  | 12 T  | 0.00006904 |
| rs569523    | 5 | 78024366 T           | 17 | 36 C  | 0.0004114  |
| rs2055432   | 5 | 78988769 A           | 27 | 47 C  | 0.0002837  |
| rs4704574   | 5 | 78989327 C           | 28 | 47 T  | 0.0005255  |
| rs4704575   | 5 | 78989365 G           | 28 | 47 A  | 0.0005255  |
| rs4704576   | 5 | 78989486 C           | 28 | 46 T  | 0.0009321  |
| rs7702610   | 5 | 78990914 C           | 27 | 46 A  | 0.0005154  |
| rs12514427  | 5 | 78992606 G           | 28 | 46 A  | 0.0009321  |
| rs4704577   | 5 | 79006389 T           | 25 | 43 C  | 0.0008649  |
| rs201096991 | 5 | 83266476 G           | 0  | 10 A  | 0.0004292  |
| rs10063186  | 5 | 85052886 T           | 24 | 42 C  | 0.0008352  |
| rs10067814  | 5 | 85055484 T           | 24 | 42 C  | 0.0008352  |
| rs3909944   | 5 | 85055983 G           | 24 | 42 T  | 0.0008352  |
| rs62363128  | 5 | 85057573 C           | 5  | 19 T  | 0.0008415  |
| 5:85063367  | 5 | 85063367 CTGGAGTGCAG | 5  | 19 C  | 0.0008415  |
| rs62364079  | 5 | 85097891 A           | 24 | 44 T  | 0.0002594  |
| rs10078974  | 5 | 85101296 T           | 24 | 42 G  | 0.0008352  |
| rs6860643   | 5 | 85102038 T           | 23 | 42 G  | 0.0004519  |
| rs6879925   | 5 | 85102220 A           | 23 | 42 G  | 0.0004519  |
| 5:85102370  | 5 | 85102370 C           | 23 | 42 CT | 0.0004519  |
| rs1039324   | 5 | 85102498 G           | 23 | 42 A  | 0.0004519  |
| rs4304102   | 5 | 85108834 T           | 23 | 42 A  | 0.0004519  |
| rs10942404  | 5 | 85109492 C           | 22 | 42 T  | 0.0002369  |
| rs6895196   | 5 | 85111641 A           | 7  | 22 T  | 0.0009169  |
| rs2173679   | 5 | 85111915 A           | 22 | 42 G  | 0.0002369  |
| rs6877523   | 5 | 85115583 C           | 7  | 22 T  | 0.0009169  |
| rs6888878   | 5 | 85117627 T           | 22 | 42 C  | 0.0002369  |
| rs6868211   | 5 | 85117836 G           | 22 | 42 A  | 0.0002369  |
| rs12652897  | 5 | 85123006 C           | 22 | 42 G  | 0.0002369  |

|             |   |             |    |            |            |
|-------------|---|-------------|----|------------|------------|
| rs57485661  | 5 | 85124421 A  | 7  | 22 G       | 0.0009169  |
| rs10071957  | 5 | 85124453 A  | 22 | 42 G       | 0.0002369  |
| rs10942407  | 5 | 85126036 A  | 22 | 42 C       | 0.0002369  |
| rs10069169  | 5 | 85126181 T  | 22 | 42 C       | 0.0002369  |
| rs10474196  | 5 | 85127397 A  | 22 | 42 G       | 0.0002369  |
| rs71607777  | 5 | 85129576 T  | 22 | 43 TACAAAA | 0.0001272  |
| rs6881850   | 5 | 85130765 A  | 7  | 22 G       | 0.0009169  |
| rs11742380  | 5 | 85131478 A  | 7  | 22 C       | 0.0009169  |
| rs2133745   | 5 | 85136248 G  | 23 | 42 T       | 0.0004519  |
| rs34068512  | 5 | 85140278 GT | 23 | 42 G       | 0.0004519  |
| rs144463603 | 5 | 85173367 A  | 0  | 10 C       | 0.0004292  |
| rs72781968  | 5 | 85186743 T  | 0  | 10 C       | 0.0004292  |
| rs149527180 | 5 | 85205233 C  | 0  | 10 T       | 0.0004292  |
| rs72783908  | 5 | 85232631 G  | 0  | 10 T       | 0.0004292  |
| rs147518381 | 5 | 86338865 G  | 5  | 19 A       | 0.0008415  |
| rs10514311  | 5 | 89027113 T  | 6  | 21 C       | 0.0006518  |
| rs6893436   | 5 | 89040596 A  | 6  | 21 T       | 0.0006518  |
| rs10074028  | 5 | 89041960 A  | 5  | 20 G       | 0.0004383  |
| rs6868869   | 5 | 89042883 A  | 5  | 20 T       | 0.0004383  |
| rs13182917  | 5 | 89052566 A  | 5  | 20 T       | 0.0004383  |
| rs6452945   | 5 | 90499159 A  | 19 | 3 T        | 0.0005082  |
| rs2941885   | 5 | 90505517 C  | 28 | 8 A        | 0.0006092  |
| 5:91200681  | 5 | 91200681 A  | 45 | 16 T       | 0.00002569 |
| 5:91200683  | 5 | 91200683 A  | 45 | 16 T       | 0.00002569 |
| rs116698885 | 5 | 102950733 G | 14 | 1 A        | 0.0007094  |
| rs113569962 | 5 | 105957055 G | 34 | 11 T       | 0.0003893  |
| rs10477869  | 5 | 105959382 C | 40 | 14 A       | 0.0001172  |
| rs202030174 | 5 | 105960773 C | 40 | 13 A       | 0.0000514  |
| rs74957701  | 5 | 105960906 C | 40 | 13 G       | 0.0000514  |
| rs140479842 | 5 | 105961778 G | 35 | 12 A       | 0.0004754  |
| rs200882810 | 5 | 105962269 C | 35 | 11 G       | 0.0002142  |
| rs190734124 | 5 | 105962622 A | 40 | 13 C       | 0.0000514  |
| rs183331089 | 5 | 105962624 G | 40 | 13 C       | 0.0000514  |
| rs6873840   | 5 | 105965170 G | 40 | 13 A       | 0.0000514  |
| rs9327968   | 5 | 105968183 C | 35 | 12 A       | 0.0004754  |
| rs10059626  | 5 | 105969636 A | 35 | 12 T       | 0.0005157  |
| rs138302217 | 5 | 105974033 T | 39 | 13 C       | 0.00009633 |
| rs202038596 | 5 | 105974512 G | 35 | 12 A       | 0.0004754  |
| rs58151039  | 5 | 105975178 C | 40 | 13 A       | 0.0000514  |
| rs34925549  | 5 | 105975284 G | 35 | 12 C       | 0.0004754  |
| rs5870212   | 5 | 105976556 G | 40 | 13 GA      | 0.0000514  |

|             |   |              |    |        |            |
|-------------|---|--------------|----|--------|------------|
| rs4616879   | 5 | 105982997 C  | 40 | 13 T   | 0.0000514  |
| rs9327970   | 5 | 105985135 G  | 40 | 13 A   | 0.0000514  |
| rs1158614   | 5 | 105985695 C  | 39 | 13 T   | 0.00009633 |
| rs966225    | 5 | 105986040 T  | 40 | 13 A   | 0.0000514  |
| rs7721522   | 5 | 105989095 G  | 35 | 12 A   | 0.0004754  |
| rs1370474   | 5 | 105990288 C  | 39 | 13 T   | 0.00009633 |
| rs11242599  | 5 | 105992483 A  | 34 | 12 C   | 0.000839   |
| rs6891375   | 5 | 105996058 C  | 33 | 11 A   | 0.0006951  |
| rs1370475   | 5 | 105996725 G  | 33 | 11 A   | 0.0006951  |
| rs10079437  | 5 | 106000391 G  | 33 | 11 A   | 0.0006951  |
| rs10053634  | 5 | 106002360 G  | 33 | 11 A   | 0.0006951  |
| rs1437636   | 5 | 106016950 C  | 33 | 11 T   | 0.0006951  |
| rs143398868 | 5 | 106018150 C  | 33 | 11 CAT | 0.0006951  |
| rs770165    | 5 | 107046018 T  | 24 | 5 G    | 0.0003951  |
| rs78207211  | 5 | 113161697 A  | 11 | 0 G    | 0.0007855  |
| rs12656434  | 5 | 113218006 A  | 50 | 25 C   | 0.0009811  |
| rs140935191 | 5 | 113218057 G  | 2  | 17 T   | 0.00012    |
| 5:113218065 | 5 | 113218065 G  | 2  | 14 T   | 0.0009649  |
| rs12186566  | 5 | 113218242 G  | 50 | 25 A   | 0.0009811  |
| rs4895328   | 5 | 120967641 A  | 7  | 23 G   | 0.0004919  |
| rs5870967   | 5 | 120968708 CT | 9  | 25 C   | 0.0008942  |
| rs6869549   | 5 | 120969061 C  | 9  | 25 T   | 0.0008942  |
| rs9327207   | 5 | 120969316 C  | 9  | 25 A   | 0.0008942  |
| rs7711526   | 5 | 120969689 G  | 9  | 25 A   | 0.0008942  |
| rs7731440   | 5 | 120969849 T  | 9  | 25 A   | 0.0008942  |
| rs4370308   | 5 | 120983112 C  | 9  | 25 T   | 0.0008942  |
| rs337092    | 5 | 122558368 C  | 38 | 15 T   | 0.0007851  |
| rs79167211  | 5 | 122560124 T  | 16 | 1 C    | 0.0001772  |
| rs17405383  | 5 | 122560170 G  | 16 | 1 A    | 0.0001772  |
| rs150027894 | 5 | 122566007 T  | 16 | 1 G    | 0.0001772  |
| rs13172417  | 5 | 122566448 A  | 16 | 1 G    | 0.0001772  |
| rs34280645  | 5 | 122568587 C  | 16 | 1 A    | 0.0001772  |
| rs74414053  | 5 | 122569810 C  | 16 | 1 A    | 0.0001772  |
| rs76138637  | 5 | 122569848 G  | 16 | 1 C    | 0.0001772  |
| 5:122573470 | 5 | 122573470 C  | 15 | 1 T    | 0.0003561  |
| 5:122573576 | 5 | 122573576 T  | 16 | 1 G    | 0.0001772  |
| 5:122573578 | 5 | 122573578 C  | 16 | 1 T    | 0.0001772  |
| 5:122573586 | 5 | 122573586 G  | 16 | 1 C    | 0.0001772  |
| 5:122573736 | 5 | 122573736 C  | 16 | 1 T    | 0.0001772  |
| 5:122573742 | 5 | 122573742 A  | 16 | 1 G    | 0.0001772  |
| 5:122573780 | 5 | 122573780 T  | 15 | 1 C    | 0.0003561  |

|             |   |              |    |       |            |
|-------------|---|--------------|----|-------|------------|
| 5:122575121 | 5 | 122575121 C  | 16 | 1 G   | 0.0001772  |
| 5:122576433 | 5 | 122576433 A  | 16 | 1 G   | 0.0001772  |
| rs79781130  | 5 | 122577509 G  | 16 | 1 T   | 0.0001772  |
| rs71594339  | 5 | 122579587 G  | 16 | 1 A   | 0.0001772  |
| rs35608317  | 5 | 122581688 A  | 16 | 1 G   | 0.0001772  |
| rs17405867  | 5 | 122581941 G  | 16 | 1 A   | 0.0001772  |
| rs13164755  | 5 | 122584429 A  | 16 | 1 G   | 0.0001772  |
| rs145981334 | 5 | 122587801 C  | 16 | 1 G   | 0.0001772  |
| 5:122589049 | 5 | 122589049 A  | 16 | 1 G   | 0.0001772  |
| 5:122589050 | 5 | 122589050 A  | 16 | 1 G   | 0.0001772  |
| rs6884047   | 5 | 122597982 G  | 14 | 1 A   | 0.0006479  |
| rs79445288  | 5 | 122600576 T  | 16 | 1 A   | 0.0001772  |
| rs111502771 | 5 | 122601754 C  | 16 | 1 A   | 0.0001772  |
| rs79398678  | 5 | 122601871 G  | 16 | 1 T   | 0.0001772  |
| rs6881525   | 5 | 122606476 C  | 12 | 0 T   | 0.0003752  |
| 5:124925463 | 5 | 124925463 T  | 16 | 2 TAG | 0.0008956  |
| rs2162702   | 5 | 125525211 C  | 34 | 12 A  | 0.000839   |
| rs7718533   | 5 | 125533158 T  | 31 | 10 G  | 0.0006062  |
| rs13359614  | 5 | 125550942 C  | 31 | 10 T  | 0.0006062  |
| rs10069560  | 5 | 132499786 C  | 6  | 24 G  | 0.00008935 |
| rs1428142   | 5 | 132500250 A  | 6  | 21 G  | 0.0005124  |
| rs1346488   | 5 | 132500707 G  | 6  | 24 C  | 0.00008935 |
| rs10479029  | 5 | 132501489 A  | 6  | 23 G  | 0.0001763  |
| rs71221401  | 5 | 132501948 GT | 6  | 23 G  | 0.0001763  |
| rs6596105   | 5 | 132502510 T  | 6  | 24 C  | 0.00008935 |
| rs10075650  | 5 | 132502643 T  | 6  | 24 G  | 0.00008935 |
| rs6596106   | 5 | 132502706 C  | 6  | 24 T  | 0.00008935 |
| rs34716434  | 5 | 132503050 A  | 6  | 24 AT | 0.00008935 |
| rs2864674   | 5 | 132503211 G  | 6  | 24 A  | 0.00008935 |
| rs2864675   | 5 | 132503305 G  | 6  | 24 T  | 0.00008935 |
| rs139044359 | 5 | 132503863 AT | 6  | 24 A  | 0.00008935 |
| rs6876153   | 5 | 132503945 G  | 8  | 25 C  | 0.0003633  |
| rs148563958 | 5 | 132504805 C  | 5  | 24 G  | 0.00002717 |
| rs10078326  | 5 | 132505281 C  | 6  | 24 T  | 0.00008935 |
| rs4958098   | 5 | 132505795 G  | 6  | 24 A  | 0.00008935 |
| rs2081876   | 5 | 132506338 C  | 6  | 24 G  | 0.00008935 |
| rs2864676   | 5 | 132506685 C  | 6  | 24 T  | 0.00008935 |
| rs2864677   | 5 | 132506913 T  | 6  | 24 C  | 0.00008935 |
| rs2864678   | 5 | 132507175 C  | 6  | 24 A  | 0.00008935 |
| rs1428149   | 5 | 132510176 G  | 6  | 24 A  | 0.00008935 |
| rs2195308   | 5 | 132510855 T  | 6  | 24 C  | 0.00008935 |

|             |   |              |    |          |            |
|-------------|---|--------------|----|----------|------------|
| rs1896634   | 5 | 132511553 C  | 6  | 24 T     | 0.00008935 |
| rs6895827   | 5 | 132512049 G  | 6  | 23 C     | 0.0001763  |
| rs10065529  | 5 | 132513293 G  | 6  | 23 T     | 0.0001763  |
| rs141838651 | 5 | 132516619 C  | 6  | 23 T     | 0.0001763  |
| rs187907350 | 5 | 132516659 G  | 6  | 23 A     | 0.0001763  |
| rs7445282   | 5 | 132517003 G  | 6  | 23 T     | 0.0001763  |
| rs4605841   | 5 | 132517114 A  | 6  | 23 G     | 0.0001763  |
| rs10479033  | 5 | 132517892 T  | 6  | 23 C     | 0.0001763  |
| rs10479034  | 5 | 132518301 G  | 6  | 23 C     | 0.0001763  |
| rs199797087 | 5 | 132519701 C  | 6  | 23 A     | 0.0001763  |
| rs200466766 | 5 | 132520095 T  | 6  | 23 TC    | 0.0001763  |
| rs28721275  | 5 | 132521908 C  | 6  | 23 T     | 0.0001763  |
| rs28711097  | 5 | 132522108 A  | 6  | 22 C     | 0.000342   |
| rs28615392  | 5 | 132522121 C  | 6  | 22 G     | 0.000342   |
| rs10068084  | 5 | 132523892 T  | 6  | 23 G     | 0.0001763  |
| rs11744199  | 5 | 132527098 A  | 6  | 23 G     | 0.0001763  |
| rs201464745 | 5 | 132528130 C  | 6  | 23 CCAT  | 0.0001763  |
| rs67782869  | 5 | 132529906 A  | 6  | 23 G     | 0.0001763  |
| rs61168871  | 5 | 132531840 T  | 6  | 24 A     | 0.00008935 |
| rs57352224  | 5 | 132532002 A  | 6  | 24 G     | 0.00008935 |
| rs61671272  | 5 | 132532128 G  | 6  | 24 GA    | 0.00008935 |
| rs3749820   | 5 | 132533063 T  | 6  | 24 A     | 0.00008935 |
| rs13183672  | 5 | 132533517 C  | 6  | 24 A     | 0.00008935 |
| rs3798103   | 5 | 132534059 G  | 6  | 24 T     | 0.00008935 |
| rs3749817   | 5 | 132535046 A  | 6  | 24 G     | 0.00008935 |
| rs3749816   | 5 | 132535659 G  | 16 | 34 A     | 0.0006492  |
| rs71581359  | 5 | 132538068 G  | 7  | 24 GAAGT | 0.0002593  |
| rs4533941   | 5 | 132539483 C  | 7  | 24 T     | 0.0002593  |
| rs4441915   | 5 | 132539522 T  | 7  | 24 G     | 0.0002593  |
| rs67266593  | 5 | 132540436 A  | 7  | 24 ATTGT | 0.0002593  |
| rs9327646   | 5 | 132540707 A  | 7  | 24 G     | 0.0002593  |
| rs9327647   | 5 | 132541007 A  | 7  | 24 G     | 0.0002593  |
| rs9327648   | 5 | 132541121 T  | 7  | 24 C     | 0.0002593  |
| rs141063508 | 5 | 132541475 T  | 7  | 24 TAATC | 0.0002593  |
| rs5871476   | 5 | 132541874 CA | 7  | 24 C     | 0.0002593  |
| rs67490161  | 5 | 132542052 G  | 7  | 24 GTTAT | 0.0002593  |
| rs4958168   | 5 | 132543001 G  | 9  | 25 A     | 0.0008942  |
| rs13175863  | 5 | 134579640 T  | 0  | 9 C      | 0.0009641  |
| rs429946    | 5 | 141183920 T  | 1  | 12 C     | 0.0007887  |
| rs420150    | 5 | 141184008 A  | 1  | 12 C     | 0.0007887  |
| rs404942    | 5 | 141184120 T  | 1  | 12 C     | 0.0007887  |

|            |   |             |    |      |           |
|------------|---|-------------|----|------|-----------|
| rs430963   | 5 | 141184633 T | 1  | 12 C | 0.0007887 |
| rs457518   | 5 | 141185061 A | 1  | 12 G | 0.0007887 |
| rs456653   | 5 | 141185473 A | 1  | 12 C | 0.0007887 |
| rs2974707  | 5 | 141187233 G | 1  | 12 A | 0.0007887 |
| rs248470   | 5 | 141188537 G | 1  | 12 C | 0.0007887 |
| rs447869   | 5 | 141188750 A | 1  | 12 C | 0.0007887 |
| rs248472   | 5 | 141189541 T | 1  | 12 C | 0.0007887 |
| rs173570   | 5 | 141198031 G | 0  | 10 A | 0.0004292 |
| rs171584   | 5 | 141201531 C | 0  | 10 G | 0.0004292 |
| rs248517   | 5 | 141201893 A | 0  | 10 C | 0.0004292 |
| rs116557   | 5 | 141203359 G | 0  | 10 T | 0.0004292 |
| rs123146   | 5 | 141204679 G | 0  | 10 C | 0.0004292 |
| rs248508   | 5 | 141208344 A | 0  | 10 G | 0.0004292 |
| rs248506   | 5 | 141208854 A | 0  | 10 G | 0.0004292 |
| rs2974703  | 5 | 141225318 G | 1  | 13 C | 0.0003716 |
| rs2974704  | 5 | 141227042 T | 1  | 13 C | 0.0003716 |
| rs75718464 | 5 | 141231970 T | 1  | 13 C | 0.0003716 |
| rs10054359 | 5 | 143357845 A | 11 | 0 G  | 0.0007855 |
| rs10477222 | 5 | 143359111 T | 11 | 0 C  | 0.0007855 |
| rs12717907 | 5 | 143364448 T | 11 | 0 C  | 0.0007855 |
| rs10056911 | 5 | 143365966 A | 11 | 0 C  | 0.0007855 |
| rs6870501  | 5 | 143366425 G | 11 | 0 A  | 0.0007855 |
| rs67611103 | 5 | 143368861 A | 11 | 0 G  | 0.0007855 |
| rs35152581 | 5 | 143370499 T | 11 | 0 TC | 0.0007855 |
| rs7727120  | 5 | 143371748 A | 11 | 0 G  | 0.0007855 |
| rs13360967 | 5 | 143372189 T | 11 | 0 G  | 0.0007855 |
| rs10044882 | 5 | 143373540 A | 11 | 0 G  | 0.0007855 |
| rs10044910 | 5 | 143373611 A | 11 | 0 G  | 0.0007855 |
| rs10068921 | 5 | 143376594 T | 11 | 0 C  | 0.0007855 |
| rs9324935  | 5 | 143377050 T | 11 | 0 C  | 0.0007855 |
| rs67244803 | 5 | 143377715 A | 11 | 0 G  | 0.0007855 |
| rs10076085 | 5 | 143378264 A | 11 | 0 G  | 0.0007855 |
| rs10069477 | 5 | 143378291 G | 11 | 0 A  | 0.0007855 |
| rs13181480 | 5 | 143378452 G | 11 | 0 C  | 0.0007855 |
| rs10078432 | 5 | 143379748 A | 11 | 0 G  | 0.0007855 |
| rs10066351 | 5 | 143380917 T | 11 | 0 C  | 0.0007855 |
| rs1497746  | 5 | 143381414 T | 11 | 0 A  | 0.0007855 |
| rs34660587 | 5 | 143382771 T | 11 | 0 TA | 0.0007855 |
| rs13175610 | 5 | 143384428 A | 11 | 0 C  | 0.0007855 |
| rs13174792 | 5 | 143384615 A | 11 | 0 G  | 0.0007855 |
| rs12717908 | 5 | 143387284 A | 11 | 0 T  | 0.0007855 |

|             |   |               |    |      |           |
|-------------|---|---------------|----|------|-----------|
| rs111437042 | 5 | 143390644 TG  | 11 | 0 T  | 0.0007855 |
| rs56166697  | 5 | 143390645 G   | 11 | 0 C  | 0.0007855 |
| rs28498587  | 5 | 143390662 C   | 11 | 0 T  | 0.0007855 |
| rs28521517  | 5 | 143390745 G   | 11 | 0 A  | 0.0007855 |
| rs6877207   | 5 | 143390802 G   | 11 | 0 A  | 0.0007855 |
| rs28449742  | 5 | 143390816 T   | 11 | 0 C  | 0.0007855 |
| rs7700905   | 5 | 143391092 A   | 11 | 0 G  | 0.0007855 |
| rs7701240   | 5 | 143391310 T   | 11 | 0 G  | 0.0007855 |
| rs7726003   | 5 | 143391442 C   | 11 | 0 T  | 0.0007855 |
| rs7702656   | 5 | 143391500 A   | 11 | 0 C  | 0.0007855 |
| rs28855539  | 5 | 143391967 T   | 11 | 0 A  | 0.0007855 |
| rs28826677  | 5 | 143392041 T   | 11 | 0 C  | 0.0007855 |
| rs28768503  | 5 | 143392065 C   | 11 | 0 T  | 0.0007855 |
| rs34681142  | 5 | 143392128 C   | 11 | 0 T  | 0.0007855 |
| rs72797441  | 5 | 143392278 T   | 11 | 0 C  | 0.0007855 |
| rs72797443  | 5 | 143392286 T   | 11 | 0 C  | 0.0007855 |
| rs35522635  | 5 | 143392424 T   | 11 | 0 C  | 0.0007855 |
| rs34213275  | 5 | 143392484 A   | 11 | 0 G  | 0.0007855 |
| rs28693642  | 5 | 143392766 A   | 11 | 0 G  | 0.0007855 |
| rs3913201   | 5 | 143392946 G   | 11 | 0 A  | 0.0007855 |
| rs3913200   | 5 | 143393115 A   | 11 | 0 G  | 0.0007855 |
| rs3913199   | 5 | 143393155 T   | 11 | 0 C  | 0.0007855 |
| rs13354382  | 5 | 143393378 G   | 11 | 0 C  | 0.0007855 |
| rs13354385  | 5 | 143393402 T   | 11 | 0 C  | 0.0007855 |
| rs13358741  | 5 | 143393599 T   | 11 | 0 G  | 0.0007855 |
| rs34037977  | 5 | 143393853 T   | 11 | 0 C  | 0.0007855 |
| rs35720433  | 5 | 143394238 G   | 11 | 0 C  | 0.0007855 |
| rs17101368  | 5 | 143394562 G   | 11 | 0 A  | 0.0007855 |
| rs13163496  | 5 | 143394734 G   | 11 | 0 C  | 0.0007855 |
| rs112207493 | 5 | 143394765 GA  | 11 | 0 G  | 0.0007855 |
| rs17101389  | 5 | 143397593 T   | 12 | 0 C  | 0.0003752 |
| rs34656558  | 5 | 143650193 TAA | 5  | 21 T | 0.0004449 |
| rs13187326  | 5 | 143738995 A   | 18 | 3 G  | 0.0009486 |
| rs17387610  | 5 | 144091703 A   | 30 | 48 G | 0.0009571 |
| rs11749768  | 5 | 153877234 T   | 2  | 15 C | 0.0004755 |
| rs60663840  | 5 | 153879520 G   | 2  | 16 A | 0.0002312 |
| rs6580084   | 5 | 153882460 C   | 2  | 16 G | 0.0002312 |
| rs80164565  | 5 | 153884201 C   | 2  | 16 T | 0.0002312 |
| rs72803027  | 5 | 156154347 G   | 0  | 9 T  | 0.0009641 |
| rs17053865  | 5 | 156154478 G   | 0  | 9 A  | 0.0009641 |
| rs72803029  | 5 | 156155368 G   | 0  | 9 C  | 0.0009641 |



|            |   |              |    |        |           |
|------------|---|--------------|----|--------|-----------|
| rs10515742 | 5 | 156155832 G  | 0  | 9 A    | 0.0009641 |
| rs17053873 | 5 | 156164188 T  | 0  | 9 G    | 0.0009641 |
| rs10515744 | 5 | 156166759 T  | 0  | 9 C    | 0.0009641 |
| rs11955986 | 5 | 156168617 A  | 0  | 9 G    | 0.0009641 |
| rs10515745 | 5 | 156170837 A  | 0  | 9 G    | 0.0009641 |
| rs66744889 | 5 | 156174457 T  | 0  | 9 C    | 0.0009641 |
| rs56297325 | 5 | 156175259 G  | 0  | 9 A    | 0.0009641 |
| rs59428757 | 5 | 156179592 T  | 0  | 9 C    | 0.0009641 |
| rs11135381 | 5 | 156182200 G  | 0  | 9 A    | 0.0009641 |
| rs11135382 | 5 | 156182450 A  | 0  | 9 C    | 0.0009641 |
| rs57452961 | 5 | 156182818 C  | 0  | 9 T    | 0.0009641 |
| rs3215118  | 5 | 156184457 GT | 0  | 9 G    | 0.0009641 |
| rs3913020  | 5 | 156185734 G  | 0  | 9 A    | 0.0009641 |
| rs3857412  | 5 | 156187182 C  | 0  | 9 G    | 0.0009641 |
| rs1389818  | 5 | 156188019 C  | 0  | 9 T    | 0.0009641 |
| rs56389540 | 5 | 156190493 G  | 0  | 9 A    | 0.0009641 |
| rs10041876 | 5 | 156190796 T  | 0  | 9 A    | 0.0009641 |
| rs1845479  | 5 | 156191214 C  | 0  | 9 T    | 0.0009641 |
| rs3913482  | 5 | 156191515 T  | 0  | 9 C    | 0.0009641 |
| rs11953631 | 5 | 156192264 T  | 0  | 9 C    | 0.0009641 |
| rs2029776  | 5 | 156196045 G  | 0  | 9 A    | 0.0009641 |
| rs56920379 | 5 | 156196226 T  | 0  | 9 A    | 0.0009641 |
| rs56094322 | 5 | 156201303 G  | 0  | 9 A    | 0.0009641 |
| rs3909322  | 5 | 156254003 A  | 0  | 9 G    | 0.0009641 |
| rs1978426  | 5 | 156261279 T  | 0  | 9 C    | 0.0009641 |
| rs9313318  | 5 | 156261737 G  | 0  | 9 A    | 0.0009641 |
| rs10475787 | 5 | 156262172 C  | 0  | 9 G    | 0.0009641 |
| rs7725502  | 5 | 156263206 A  | 0  | 9 C    | 0.0009641 |
| rs10475501 | 5 | 156264032 A  | 0  | 9 C    | 0.0009641 |
| rs9885363  | 5 | 156267197 A  | 0  | 9 G    | 0.0009641 |
| rs7704664  | 5 | 156268656 C  | 0  | 9 T    | 0.0009641 |
| rs55711014 | 5 | 156270765 C  | 0  | 9 A    | 0.0009641 |
| rs7707893  | 5 | 156272432 T  | 0  | 9 C    | 0.0009641 |
| rs6555703  | 5 | 156272490 T  | 0  | 9 C    | 0.0009641 |
| rs12153343 | 5 | 158964827 T  | 27 | 45 A   | 0.0009136 |
| rs35978513 | 5 | 160736639 A  | 3  | 16 ATT | 0.0009912 |
| rs6556667  | 5 | 162746270 C  | 5  | 19 T   | 0.0008415 |
| rs1421840  | 5 | 162773548 G  | 19 | 3 A    | 0.0005082 |
| rs2216559  | 5 | 162778631 G  | 21 | 3 A    | 0.0002475 |
| rs34432869 | 5 | 162782745 A  | 20 | 3 G    | 0.000269  |
| rs35836896 | 5 | 162789959 A  | 19 | 3 T    | 0.0005082 |

|             |   |              |    |          |           |
|-------------|---|--------------|----|----------|-----------|
| rs13159369  | 5 | 162801076 A  | 19 | 3 G      | 0.0005082 |
| rs34472788  | 5 | 167637617 C  | 4  | 20 CT    | 0.0002424 |
| rs11480110  | 5 | 167648116 CA | 3  | 18 C     | 0.0002532 |
| rs55982071  | 5 | 168253296 A  | 1  | 12 G     | 0.0007887 |
| rs59344702  | 5 | 168254496 C  | 1  | 12 T     | 0.0007887 |
| rs7726584   | 5 | 168254897 G  | 1  | 12 T     | 0.0007887 |
| rs7707369   | 5 | 168255217 A  | 1  | 12 G     | 0.0007887 |
| rs3797456   | 5 | 172754364 G  | 23 | 5 A      | 0.0006807 |
| rs4867706   | 5 | 172781934 G  | 13 | 33 A     | 0.000122  |
| rs2034235   | 5 | 172783518 T  | 12 | 32 C     | 0.0001005 |
| rs1862428   | 5 | 172784614 C  | 12 | 32 T     | 0.0001005 |
| rs10476071  | 5 | 172785705 A  | 21 | 41 G     | 0.0003509 |
| rs202028398 | 5 | 177277758 G  | 27 | 8 T      | 0.0009854 |
| rs6601226   | 5 | 177624390 G  | 48 | 21 T     | 0.0002492 |
| rs2242213   | 5 | 180048316 G  | 1  | 12 C     | 0.0007887 |
| rs369415913 | 5 | 180718703 C  | 17 | 2 T      | 0.000467  |
| rs2816239   | 6 | 1448243 C    | 16 | 2 T      | 0.0008956 |
| rs9405141   | 6 | 1580838 T    | 5  | 19 C     | 0.0008415 |
| rs9503157   | 6 | 2369670 G    | 53 | 27 A     | 0.0006109 |
| rs4296927   | 6 | 2369733 G    | 53 | 27 C     | 0.0006109 |
| rs9503159   | 6 | 2371304 C    | 53 | 27 T     | 0.0006109 |
| rs11752965  | 6 | 2373843 T    | 51 | 25 C     | 0.0005636 |
| rs11242762  | 6 | 2379182 G    | 53 | 27 A     | 0.0006109 |
| rs11752051  | 6 | 2379497 A    | 53 | 27 G     | 0.0006109 |
| rs11756861  | 6 | 2379640 T    | 52 | 26 C     | 0.0003091 |
| rs11242763  | 6 | 2380251 A    | 53 | 27 C     | 0.0006109 |
| rs2503809   | 6 | 5388938 G    | 9  | 25 T     | 0.0008942 |
| rs35967844  | 6 | 5389386 TA   | 7  | 23 T     | 0.0004919 |
| rs2503814   | 6 | 5390860 A    | 7  | 24 G     | 0.0002593 |
| rs17140417  | 6 | 5396100 G    | 7  | 22 A     | 0.0009169 |
| rs13215393  | 6 | 5397426 A    | 7  | 22 G     | 0.0009169 |
| rs35394307  | 6 | 5398032 T    | 7  | 22 TCTTC | 0.0009169 |
| rs2326606   | 6 | 5398329 A    | 7  | 22 G     | 0.0009169 |
| rs62385371  | 6 | 5405445 C    | 7  | 22 T     | 0.0009169 |
| rs2432774   | 6 | 5406604 G    | 25 | 43 C     | 0.0008649 |
| rs35835664  | 6 | 5406899 C    | 7  | 22 T     | 0.0009169 |
| rs12528042  | 6 | 5408762 C    | 7  | 22 T     | 0.0009169 |
| rs2032986   | 6 | 5409181 G    | 25 | 43 A     | 0.0008649 |
| rs2326607   | 6 | 5412968 A    | 7  | 22 G     | 0.0009169 |
| rs1014427   | 6 | 5418852 G    | 7  | 22 C     | 0.0009169 |
| rs1549363   | 6 | 5419594 T    | 7  | 22 G     | 0.0009169 |

|            |   |            |    |                 |            |
|------------|---|------------|----|-----------------|------------|
| rs5873980  | 6 | 5419708 C  | 7  | 22 CTTTACCGTTT  | 0.0009169  |
| rs34269790 | 6 | 5420060 A  | 7  | 22 G            | 0.0009169  |
| rs35719003 | 6 | 5420105 T  | 7  | 22 C            | 0.0009169  |
| rs12524064 | 6 | 5422832 T  | 7  | 22 G            | 0.0009169  |
| rs34499406 | 6 | 5423324 G  | 7  | 22 GC           | 0.0009169  |
| rs11757581 | 6 | 5424511 T  | 7  | 22 C            | 0.0009169  |
| rs11752854 | 6 | 5424762 A  | 7  | 22 G            | 0.0009169  |
| rs9405266  | 6 | 5426228 A  | 22 | 41 G            | 0.0004309  |
| rs11752504 | 6 | 5426450 C  | 7  | 22 T            | 0.0009169  |
| rs4960090  | 6 | 5427879 T  | 7  | 22 C            | 0.0009169  |
| rs35420040 | 6 | 5429820 A  | 7  | 22 C            | 0.0009169  |
| rs13210571 | 6 | 5429888 G  | 7  | 22 A            | 0.0009169  |
| rs11753202 | 6 | 5430181 A  | 5  | 22 G            | 0.0002207  |
| rs11243011 | 6 | 5431340 G  | 7  | 22 A            | 0.0009169  |
| rs5873981  | 6 | 5434330 TA | 7  | 22 T            | 0.0009169  |
| rs1424736  | 6 | 5434447 T  | 7  | 22 C            | 0.0009169  |
| rs200190   | 6 | 5483696 T  | 24 | 43 G            | 0.000471   |
| rs4476877  | 6 | 6988545 C  | 14 | 1 T             | 0.0007094  |
| rs9379896  | 6 | 10886949 C | 20 | 2 T             | 0.00006204 |
| rs9358956  | 6 | 10887253 G | 18 | 1 C             | 0.00004271 |
| rs9348724  | 6 | 10887276 C | 18 | 1 G             | 0.00004271 |
| 6:17167167 | 6 | 17167167 G | 28 | 8 A             | 0.0006092  |
| rs35544048 | 6 | 17758844 C | 5  | 21 G            | 0.0002243  |
| rs11963363 | 6 | 22914924 C | 11 | 28 A            | 0.0008103  |
| rs12526188 | 6 | 22919962 C | 0  | 9 T             | 0.0009641  |
| rs13201703 | 6 | 22921471 A | 0  | 9 C             | 0.0009641  |
| rs59885141 | 6 | 22926116 C | 0  | 9 T             | 0.0009641  |
| rs34947088 | 6 | 22929340 T | 0  | 9 A             | 0.0009641  |
| rs11967825 | 6 | 22930117 A | 0  | 9 T             | 0.0009641  |
| rs13212187 | 6 | 22941703 A | 0  | 9 G             | 0.0009641  |
| rs13211061 | 6 | 22944597 C | 0  | 9 A             | 0.0009641  |
| rs12527826 | 6 | 22947966 T | 0  | 9 G             | 0.0009641  |
| rs1569701  | 6 | 22966154 A | 0  | 9 G             | 0.0009641  |
| rs11965774 | 6 | 22971200 G | 0  | 9 C             | 0.0009641  |
| rs35588537 | 6 | 22972197 T | 0  | 9 G             | 0.0009641  |
| rs13211265 | 6 | 22974647 T | 0  | 9 G             | 0.0009641  |
| rs12525343 | 6 | 23207471 G | 1  | 13 T            | 0.0003716  |
| 6:23291477 | 6 | 23291477 A | 32 | 9 ACATACATTATAC | 0.00005996 |
| 6:23406822 | 6 | 23406822 G | 46 | 21 T            | 0.0007859  |
| rs72839070 | 6 | 25532885 G | 0  | 10 T            | 0.0004292  |
| rs9356992  | 6 | 25925400 A | 0  | 10 G            | 0.0004292  |

|             |   |             |    |         |            |
|-------------|---|-------------|----|---------|------------|
| rs9295676   | 6 | 25928376 T  | 0  | 10 G    | 0.0004292  |
| rs62394491  | 6 | 25934106 T  | 0  | 9 C     | 0.0009641  |
| rs10456346  | 6 | 26966846 G  | 0  | 9 A     | 0.0009641  |
| rs10456347  | 6 | 26966853 G  | 0  | 9 A     | 0.0009641  |
| rs10456348  | 6 | 26969033 A  | 0  | 9 T     | 0.0009641  |
| rs146539976 | 6 | 26977290 G  | 0  | 9 T     | 0.0009641  |
| rs3864294   | 6 | 28641957 G  | 22 | 41 A    | 0.0004309  |
| rs10456364  | 6 | 28681444 C  | 26 | 44 T    | 0.0002393  |
| rs9391676   | 6 | 28683743 T  | 28 | 47 C    | 0.0005255  |
| rs200314214 | 6 | 28685339 T  | 50 | 24 C    | 0.0008877  |
| rs1033569   | 6 | 29257772 C  | 46 | 21 T    | 0.0007859  |
| rs1033568   | 6 | 29257967 G  | 47 | 21 A    | 0.0004473  |
| 6:29264095  | 6 | 29264095 A  | 46 | 21 AT   | 0.0007859  |
| rs4713207   | 6 | 29264655 A  | 46 | 21 G    | 0.0007859  |
| rs9257687   | 6 | 29267175 A  | 47 | 21 G    | 0.0004473  |
| rs4713208   | 6 | 29283579 T  | 45 | 15 C    | 0.00001097 |
| rs720831    | 6 | 29284518 A  | 45 | 15 G    | 0.00001097 |
| rs10447393  | 6 | 29316852 T  | 46 | 16 C    | 0.00001332 |
| rs7754402   | 6 | 29328834 C  | 39 | 15 T    | 0.0004501  |
| 6:29338562  | 6 | 29338562 T  | 52 | 26 TAAA | 0.0005884  |
| rs28749522  | 6 | 29338563 G  | 52 | 26 C    | 0.0005884  |
| rs4713213   | 6 | 29338962 G  | 52 | 26 A    | 0.0005884  |
| 6:29339965  | 6 | 29339965 CA | 52 | 26 C    | 0.0005884  |
| rs10807053  | 6 | 29340585 G  | 52 | 26 C    | 0.0005884  |
| rs3094561   | 6 | 29404157 T  | 28 | 47 G    | 0.0005255  |
| rs3094574   | 6 | 29422092 A  | 29 | 47 G    | 0.0009467  |
| rs3117194   | 6 | 29426008 T  | 28 | 47 C    | 0.0005255  |
| rs3128854   | 6 | 29431698 A  | 28 | 47 G    | 0.0005255  |
| rs2107191   | 6 | 29434295 C  | 28 | 47 T    | 0.0005255  |
| rs3117196   | 6 | 29439779 C  | 28 | 46 T    | 0.0009321  |
| rs3094573   | 6 | 29446632 G  | 28 | 46 T    | 0.0009321  |
| rs2189371   | 6 | 29449840 C  | 28 | 46 T    | 0.0009321  |
| rs3128844   | 6 | 29459260 G  | 28 | 46 C    | 0.0009321  |
| rs3131854   | 6 | 29611885 T  | 10 | 28 C    | 0.0003491  |
| rs3095292   | 6 | 29628620 A  | 9  | 27 G    | 0.0001402  |
| rs2071653   | 6 | 29635928 T  | 9  | 27 C    | 0.0002633  |
| rs3095291   | 6 | 29637710 C  | 9  | 27 G    | 0.0002633  |
| rs3117290   | 6 | 29649944 T  | 9  | 26 G    | 0.0004896  |
| rs1610726   | 6 | 29738665 G  | 38 | 15 C    | 0.0007851  |
| 6:29738688  | 6 | 29738688 C  | 38 | 15 T    | 0.0007851  |
| rs1610722   | 6 | 29761467 C  | 42 | 18 A    | 0.0006782  |

|            |   |                  |    |      |           |
|------------|---|------------------|----|------|-----------|
| rs3094170  | 6 | 29829265 T       | 7  | 22 C | 0.0009169 |
| rs3128904  | 6 | 29831466 A       | 5  | 20 G | 0.0004383 |
| rs3128900  | 6 | 29833057 G       | 7  | 22 T | 0.0009169 |
| rs3115612  | 6 | 29851443 A       | 7  | 23 G | 0.0004919 |
| rs9259141  | 6 | 29852203 G       | 7  | 23 C | 0.0004919 |
| rs3094646  | 6 | 29852855 C       | 7  | 23 T | 0.0004919 |
| rs3094645  | 6 | 29853936 C       | 7  | 23 T | 0.0004919 |
| rs9259191  | 6 | 29854280 T       | 7  | 23 C | 0.0004919 |
| rs9259192  | 6 | 29854392 C       | 7  | 23 T | 0.0004919 |
| rs3132697  | 6 | 29854539 A       | 7  | 23 G | 0.0004919 |
| rs1054176  | 6 | 29854703 A       | 7  | 23 G | 0.0004919 |
| rs3132696  | 6 | 29855331 A       | 7  | 23 G | 0.0004919 |
| rs59958576 | 6 | 29855580 GCCCTGA | 10 | 28 G | 0.0003491 |
| rs3128876  | 6 | 29856178 C       | 7  | 23 T | 0.0004919 |
| rs3115604  | 6 | 29857730 G       | 7  | 23 C | 0.0004919 |
| rs9259265  | 6 | 29857852 A       | 7  | 23 G | 0.0004919 |
| rs3115603  | 6 | 29858213 G       | 7  | 23 C | 0.0004919 |
| rs9259329  | 6 | 29861134 T       | 9  | 25 G | 0.0008942 |
| rs3115595  | 6 | 29861795 A       | 7  | 23 T | 0.0004919 |
| 6:29862476 | 6 | 29862476 T       | 7  | 23 C | 0.0004919 |
| rs77646284 | 6 | 29862699 C       | 7  | 23 T | 0.0004919 |
| rs3094185  | 6 | 29867395 T       | 7  | 23 A | 0.0004919 |
| rs3094167  | 6 | 29872869 A       | 8  | 24 G | 0.0006758 |
| rs9259585  | 6 | 29873562 G       | 7  | 23 A | 0.0004919 |
| rs9259588  | 6 | 29873671 T       | 7  | 23 G | 0.0004919 |
| rs420306   | 6 | 29874165 A       | 7  | 23 T | 0.0004919 |
| rs9259640  | 6 | 29875891 C       | 7  | 23 T | 0.0004919 |
| rs9259641  | 6 | 29875965 G       | 7  | 23 A | 0.0004919 |
| rs9259645  | 6 | 29876102 G       | 7  | 23 T | 0.0004919 |
| rs2253517  | 6 | 29876774 A       | 7  | 23 C | 0.0004919 |
| rs2253518  | 6 | 29876775 G       | 7  | 23 A | 0.0004919 |
| rs1632923  | 6 | 29877000 A       | 7  | 23 G | 0.0004919 |
| rs2517805  | 6 | 29877341 A       | 7  | 23 G | 0.0004919 |
| rs3094143  | 6 | 29877483 C       | 45 | 19 T | 0.0003833 |
| rs3128992  | 6 | 29877572 G       | 45 | 19 A | 0.0003833 |
| rs1632922  | 6 | 29877590 A       | 7  | 23 G | 0.0004919 |
| rs415216   | 6 | 29877976 A       | 10 | 28 G | 0.0003491 |
| rs433478   | 6 | 29878055 C       | 54 | 27 T | 0.0003437 |
| rs2517800  | 6 | 29878138 T       | 10 | 28 C | 0.0003299 |
| 6:29878143 | 6 | 29878143 GA      | 10 | 28 G | 0.0001505 |
| rs2734930  | 6 | 29878262 G       | 7  | 23 A | 0.0004919 |

|            |   |             |    |      |            |
|------------|---|-------------|----|------|------------|
| rs2571406  | 6 | 29878308 A  | 10 | 28 C | 0.0003491  |
| rs2905782  | 6 | 29878432 A  | 10 | 28 G | 0.0003491  |
| rs2975022  | 6 | 29878433 C  | 10 | 28 A | 0.0003491  |
| rs2524031  | 6 | 29878456 A  | 7  | 23 C | 0.0004919  |
| rs2269853  | 6 | 29878461 T  | 54 | 27 C | 0.0003437  |
| rs3128990  | 6 | 29878483 T  | 54 | 27 C | 0.0003437  |
| rs390703   | 6 | 29878657 A  | 10 | 29 C | 0.0001875  |
| rs2975019  | 6 | 29878686 T  | 10 | 28 C | 0.0003491  |
| rs2524029  | 6 | 29878757 C  | 7  | 23 T | 0.0004919  |
| rs403306   | 6 | 29878779 A  | 10 | 28 C | 0.0003491  |
| rs419316   | 6 | 29878824 C  | 10 | 28 T | 0.0003491  |
| rs2517799  | 6 | 29878825 A  | 8  | 27 G | 0.00009961 |
| rs441627   | 6 | 29878892 T  | 10 | 28 A | 0.0003491  |
| rs2524028  | 6 | 29878897 T  | 8  | 27 G | 0.00009961 |
| rs381379   | 6 | 29879084 A  | 10 | 28 G | 0.0003491  |
| rs2524027  | 6 | 29879105 T  | 7  | 23 C | 0.0004919  |
| rs391705   | 6 | 29879173 T  | 10 | 28 C | 0.0003491  |
| rs406344   | 6 | 29879252 A  | 10 | 28 T | 0.0003491  |
| rs9259694  | 6 | 29879427 G  | 10 | 28 C | 0.0003491  |
| rs9259697  | 6 | 29879472 A  | 10 | 28 G | 0.0003491  |
| rs9259698  | 6 | 29879509 G  | 10 | 28 A | 0.0003491  |
| rs2524024  | 6 | 29879529 C  | 7  | 23 T | 0.0004919  |
| rs9259699  | 6 | 29879536 A  | 10 | 28 G | 0.0003491  |
| rs9259700  | 6 | 29879563 C  | 10 | 28 T | 0.0003491  |
| rs9259701  | 6 | 29879584 C  | 10 | 28 T | 0.0003491  |
| rs2734929  | 6 | 29879655 T  | 10 | 28 C | 0.0003491  |
| rs2734928  | 6 | 29879804 G  | 7  | 23 A | 0.0004919  |
| rs2524023  | 6 | 29879911 C  | 8  | 27 T | 0.00009961 |
| rs412982   | 6 | 29880050 T  | 10 | 28 C | 0.0003491  |
| rs446822   | 6 | 29880181 A  | 10 | 28 G | 0.0003491  |
| 6:29880395 | 6 | 29880395 AG | 10 | 28 A | 0.0003491  |
| rs2893996  | 6 | 29880397 C  | 10 | 28 T | 0.0003491  |
| rs368685   | 6 | 29880406 A  | 10 | 28 G | 0.0003491  |
| rs2254042  | 6 | 29880424 C  | 10 | 28 A | 0.0003491  |
| rs2571409  | 6 | 29880428 C  | 10 | 28 T | 0.0003491  |
| rs1611440  | 6 | 29880429 A  | 7  | 23 G | 0.0004919  |
| rs1611442  | 6 | 29880825 T  | 8  | 27 C | 0.00009961 |
| rs1611443  | 6 | 29880904 C  | 7  | 23 T | 0.0004919  |
| rs1611444  | 6 | 29881093 G  | 7  | 23 A | 0.0004919  |
| rs2734926  | 6 | 29881244 G  | 10 | 28 A | 0.0003491  |
| rs1610754  | 6 | 29881268 A  | 8  | 27 G | 0.00009961 |

|            |   |              |   |      |            |
|------------|---|--------------|---|------|------------|
| rs1611447  | 6 | 29881754 T   | 7 | 23 G | 0.0004919  |
| rs1611452  | 6 | 29882005 A   | 7 | 23 G | 0.0004919  |
| rs1611457  | 6 | 29882147 A   | 8 | 27 T | 0.00009961 |
| rs2734924  | 6 | 29882174 C   | 8 | 27 G | 0.00009961 |
| rs1611458  | 6 | 29882297 T   | 7 | 23 G | 0.0004919  |
| rs2734923  | 6 | 29882749 T   | 8 | 27 A | 0.00009961 |
| rs1611462  | 6 | 29882790 A   | 8 | 27 G | 0.00009961 |
| rs1610755  | 6 | 29882985 A   | 8 | 27 G | 0.0001129  |
| rs1610756  | 6 | 29883728 T   | 7 | 23 C | 0.0004919  |
| rs1611474  | 6 | 29884075 A   | 8 | 27 G | 0.00009961 |
| rs1611478  | 6 | 29884533 T   | 7 | 23 C | 0.0004919  |
| rs1611479  | 6 | 29884541 A   | 8 | 27 G | 0.00009961 |
| rs1611481  | 6 | 29885169 G   | 7 | 23 C | 0.0004919  |
| rs1611484  | 6 | 29885307 G   | 7 | 23 T | 0.0004919  |
| rs1610757  | 6 | 29886191 C   | 7 | 23 A | 0.0004919  |
| rs1610619  | 6 | 29886615 A   | 7 | 23 G | 0.0004919  |
| rs1611504  | 6 | 29887053 C   | 7 | 23 T | 0.0004919  |
| rs67378810 | 6 | 29887205 GTC | 7 | 23 G | 0.0004919  |
| rs1632913  | 6 | 29887277 T   | 7 | 23 C | 0.0004919  |
| rs1632912  | 6 | 29887497 T   | 8 | 27 G | 0.00009961 |
| rs1655949  | 6 | 29887639 A   | 7 | 23 T | 0.0004919  |
| rs1625356  | 6 | 29887885 A   | 8 | 27 G | 0.00009961 |
| rs2508042  | 6 | 29888317 A   | 8 | 27 G | 0.00009961 |
| rs1655944  | 6 | 29888396 T   | 7 | 23 C | 0.0004919  |
| rs1632911  | 6 | 29889368 T   | 7 | 23 C | 0.0004919  |
| 6:29890146 | 6 | 29890146 G   | 7 | 23 T | 0.0004919  |
| rs2517789  | 6 | 29890224 A   | 7 | 23 T | 0.0004919  |
| rs1611394  | 6 | 29890563 G   | 7 | 23 A | 0.0004919  |
| rs1611401  | 6 | 29890950 A   | 7 | 23 G | 0.0004919  |
| rs1611408  | 6 | 29891423 T   | 7 | 23 C | 0.0004919  |
| rs1611413  | 6 | 29891625 T   | 7 | 23 G | 0.0004919  |
| rs1610751  | 6 | 29893040 C   | 7 | 23 T | 0.0004919  |
| rs1611430  | 6 | 29893461 G   | 7 | 23 A | 0.0005609  |
| rs1632907  | 6 | 29894794 A   | 7 | 23 G | 0.0004144  |
| rs1655936  | 6 | 29895649 G   | 7 | 25 A | 0.0001175  |
| 6:29895667 | 6 | 29895667 C   | 8 | 26 A | 0.0001738  |
| rs3863209  | 6 | 29895928 G   | 7 | 25 A | 0.0001343  |
| rs9259842  | 6 | 29895973 C   | 7 | 23 G | 0.0004919  |
| rs2517752  | 6 | 29897018 A   | 7 | 23 G | 0.0004337  |
| rs1655932  | 6 | 29897102 G   | 7 | 25 A | 0.0001343  |
| rs389725   | 6 | 29897129 C   | 9 | 26 T | 0.0004896  |

|            |   |            |    |       |           |
|------------|---|------------|----|-------|-----------|
| rs1632902  | 6 | 29897412 C | 39 | 16 G  | 0.0009032 |
| rs1632901  | 6 | 29897736 T | 7  | 25 C  | 0.0001343 |
| 6:29897759 | 6 | 29897759 G | 7  | 23 A  | 0.0004919 |
| rs2471864  | 6 | 29897770 A | 39 | 16 G  | 0.0009032 |
| rs6926454  | 6 | 29897872 G | 7  | 25 A  | 0.0001343 |
| rs9259870  | 6 | 29897944 A | 7  | 25 G  | 0.0001343 |
| rs9259876  | 6 | 29898117 A | 7  | 25 G  | 0.0001343 |
| rs9259890  | 6 | 29898413 A | 7  | 25 C  | 0.0001175 |
| rs2517742  | 6 | 29898751 T | 39 | 16 C  | 0.0009032 |
| rs2517741  | 6 | 29898806 G | 7  | 25 T  | 0.0001343 |
| rs2517740  | 6 | 29898821 G | 7  | 25 C  | 0.0001343 |
| rs2394705  | 6 | 29899207 C | 39 | 16 T  | 0.0009032 |
| rs1655928  | 6 | 29899461 G | 39 | 16 A  | 0.0009032 |
| rs2524004  | 6 | 29901899 C | 7  | 23 G  | 0.0004919 |
| rs1611304  | 6 | 29901919 T | 7  | 23 C  | 0.0004919 |
| rs9259925  | 6 | 29902197 C | 7  | 23 G  | 0.0004919 |
| rs1611327  | 6 | 29902837 A | 7  | 23 G  | 0.0005609 |
| rs1610618  | 6 | 29903111 T | 7  | 23 C  | 0.0004919 |
| rs2571421  | 6 | 29904309 C | 7  | 23 T  | 0.0004919 |
| rs1632896  | 6 | 29904808 A | 7  | 23 G  | 0.0004919 |
| rs1632895  | 6 | 29904838 T | 7  | 25 G  | 0.0001343 |
| rs1655925  | 6 | 29904840 C | 7  | 23 T  | 0.0004919 |
| rs1632894  | 6 | 29905158 A | 7  | 23 G  | 0.0004919 |
| rs1632893  | 6 | 29905193 G | 7  | 23 A  | 0.0004919 |
| rs1655920  | 6 | 29908667 A | 7  | 23 G  | 0.0004919 |
| rs1632889  | 6 | 29909181 A | 7  | 23 C  | 0.0004919 |
| rs2916801  | 6 | 29910286 C | 7  | 23 T  | 0.0004919 |
| rs9260142  | 6 | 29910820 G | 7  | 23 C  | 0.0004919 |
| rs67054159 | 6 | 29911457 G | 7  | 22 GT | 0.0009169 |
| rs2571381  | 6 | 29912830 T | 7  | 23 C  | 0.0004919 |
| rs2916802  | 6 | 29912935 C | 6  | 21 T  | 0.0006518 |
| rs9260205  | 6 | 29913074 A | 7  | 23 G  | 0.0004919 |
| rs41546815 | 6 | 29913078 A | 7  | 23 G  | 0.0004919 |
| rs13488    | 6 | 29913638 G | 7  | 23 C  | 0.0004919 |
| rs2248006  | 6 | 29913672 G | 7  | 23 A  | 0.0004919 |
| rs2571382  | 6 | 29913727 T | 7  | 23 C  | 0.0004919 |
| rs1655902  | 6 | 29916855 G | 7  | 24 A  | 0.0002593 |
| rs1632880  | 6 | 29917610 C | 7  | 23 G  | 0.0004919 |
| rs1632879  | 6 | 29917703 G | 7  | 23 A  | 0.0004919 |
| rs1655906  | 6 | 29918254 A | 7  | 23 T  | 0.0004919 |
| rs1655907  | 6 | 29918587 T | 7  | 23 C  | 0.0004919 |



|             |   |                    |    |            |            |
|-------------|---|--------------------|----|------------|------------|
| 6:29920465  | 6 | 29920465 A         | 7  | 23 C       | 0.0004919  |
| rs885905    | 6 | 30890431 A         | 13 | 30 G       | 0.0007578  |
| rs2257347   | 6 | 30892054 A         | 11 | 30 G       | 0.0002453  |
| rs2532941   | 6 | 30892521 G         | 13 | 31 A       | 0.0004205  |
| rs1043483   | 6 | 30893728 C         | 13 | 30 T       | 0.0007578  |
| rs2532932   | 6 | 30895444 A         | 10 | 27 G       | 0.0006386  |
| rs2532925   | 6 | 30899163 G         | 13 | 31 A       | 0.0004205  |
| rs2253588   | 6 | 30899377 C         | 13 | 31 G       | 0.0004205  |
| rs3095148   | 6 | 30933967 T         | 38 | 15 C       | 0.0007851  |
| rs9281099   | 6 | 30978979 GT        | 47 | 22 G       | 0.0008379  |
| rs2517503   | 6 | 31032407 A         | 3  | 16 C       | 0.0009912  |
| rs2517438   | 6 | 31064100 T         | 3  | 16 C       | 0.0009912  |
| rs368354370 | 6 | 31121874 CAA       | 31 | 49 C       | 0.0009634  |
| rs130066    | 6 | 31122315 C         | 51 | 23 G       | 0.000156   |
| rs3130453   | 6 | 31124849 T         | 54 | 24 C       | 0.00004651 |
| rs3095239   | 6 | 31126790 A         | 31 | 49 G       | 0.0009634  |
| rs3094187   | 6 | 31126944 T         | 55 | 27 C       | 0.0002959  |
| rs6905862   | 6 | 31127602 A         | 51 | 23 G       | 0.000156   |
| rs1419881   | 6 | 31130593 A         | 52 | 26 G       | 0.0005884  |
| rs13409     | 6 | 31132140 A         | 51 | 23 G       | 0.000156   |
| rs145919884 | 6 | 31133577 A         | 24 | 43 AAAGCCC | 0.000471   |
| rs3132526   | 6 | 31134175 T         | 55 | 27 C       | 0.0002959  |
| rs1419880   | 6 | 31135197 C         | 55 | 26 T       | 0.00009769 |
| rs2021375   | 6 | 31135387 G         | 54 | 27 A       | 0.0003437  |
| 6:31135730  | 6 | 31135730 TC        | 55 | 26 T       | 0.00009769 |
| rs3094195   | 6 | 31135966 T         | 55 | 27 C       | 0.0002959  |
| rs3094193   | 6 | 31137774 G         | 28 | 46 T       | 0.0009321  |
| rs2077010   | 6 | 31138377 T         | 49 | 23 C       | 0.0002681  |
| rs885952    | 6 | 31139490 T         | 51 | 23 C       | 0.000156   |
| rs3132520   | 6 | 31140008 C         | 32 | 50 T       | 0.0009655  |
| rs885951    | 6 | 31140091 A         | 51 | 23 C       | 0.000156   |
| rs885950    | 6 | 31140152 C         | 51 | 25 A       | 0.0005636  |
| rs885948    | 6 | 31140532 G         | 55 | 27 A       | 0.0002959  |
| rs887464    | 6 | 31145920 T         | 51 | 23 C       | 0.000156   |
| 6:31204204  | 6 | 31204204 TTCTTTCTA | 45 | 20 T       | 0.0003895  |
| rs142259499 | 6 | 31341771 A         | 39 | 15 G       | 0.0004501  |
| rs2844508   | 6 | 31436499 G         | 23 | 41 C       | 0.0008021  |
| rs2523669   | 6 | 31437872 C         | 23 | 41 T       | 0.0008021  |
| rs2596450   | 6 | 31438243 G         | 23 | 41 A       | 0.0008021  |
| rs2523663   | 6 | 31439740 G         | 24 | 42 T       | 0.0008352  |
| rs2516423   | 6 | 31449216 T         | 54 | 26 A       | 0.00008952 |

|             |   |             |    |      |           |
|-------------|---|-------------|----|------|-----------|
| rs16881066  | 6 | 35772722 G  | 13 | 0 A  | 0.0001783 |
| rs2237232   | 6 | 35812379 C  | 13 | 0 T  | 0.0001783 |
| rs3804456   | 6 | 35818395 C  | 13 | 0 T  | 0.0001783 |
| rs2301509   | 6 | 35854936 T  | 13 | 0 C  | 0.0001783 |
| rs74896584  | 6 | 35878713 T  | 13 | 0 C  | 0.0001783 |
| rs76985948  | 6 | 35895153 T  | 13 | 0 C  | 0.0001783 |
| rs9368895   | 6 | 35913096 A  | 13 | 0 C  | 0.0001783 |
| rs851044    | 6 | 35972766 A  | 27 | 45 G | 0.0009136 |
| rs4711445   | 6 | 36205532 G  | 14 | 1 C  | 0.0007094 |
| rs16886912  | 6 | 36207973 A  | 14 | 1 G  | 0.0007094 |
| rs4713939   | 6 | 36209623 A  | 20 | 3 G  | 0.000269  |
| rs150201683 | 6 | 41493770 A  | 0  | 9 G  | 0.0009641 |
| rs79102660  | 6 | 45466010 C  | 18 | 3 T  | 0.0009486 |
| rs520409    | 6 | 47802504 C  | 20 | 38 T | 0.0009963 |
| rs693770    | 6 | 47805729 C  | 20 | 38 A | 0.0009963 |
| rs576826    | 6 | 47806706 G  | 20 | 38 A | 0.0009963 |
| rs578532    | 6 | 47806895 A  | 27 | 45 G | 0.0009136 |
| rs559028    | 6 | 47809908 T  | 20 | 38 C | 0.0009963 |
| rs559768    | 6 | 47809949 T  | 20 | 38 C | 0.0009963 |
| rs563587    | 6 | 47810381 C  | 27 | 45 T | 0.0009136 |
| rs528229    | 6 | 47810445 G  | 20 | 38 A | 0.0009963 |
| rs482434    | 6 | 47811272 C  | 20 | 38 T | 0.0009963 |
| rs517025    | 6 | 47819141 G  | 20 | 38 A | 0.0009963 |
| rs579329    | 6 | 47822681 T  | 27 | 45 C | 0.0009136 |
| rs540010    | 6 | 47822907 A  | 20 | 38 T | 0.0009963 |
| rs514974    | 6 | 47825345 C  | 20 | 38 T | 0.0009963 |
| rs9463962   | 6 | 53564752 A  | 16 | 2 G  | 0.0008956 |
| rs6912139   | 6 | 53565153 A  | 19 | 2 G  | 0.0001229 |
| rs6937819   | 6 | 53569785 C  | 18 | 2 T  | 0.0002408 |
| rs9464133   | 6 | 54625502 T  | 43 | 19 A | 0.000761  |
| rs11754220  | 6 | 54629589 G  | 44 | 19 C | 0.0006784 |
| rs35741450  | 6 | 55137395 CT | 26 | 8 C  | 0.000972  |
| rs13199480  | 6 | 55878415 A  | 16 | 36 G | 0.0001978 |
| rs9370477   | 6 | 55880322 T  | 12 | 31 C | 0.0001515 |
| rs9349800   | 6 | 55885348 T  | 10 | 27 C | 0.0006386 |
| rs2206679   | 6 | 55886109 T  | 21 | 40 C | 0.0006238 |
| rs2223660   | 6 | 55886898 T  | 10 | 27 C | 0.0006386 |
| rs6933744   | 6 | 55887025 A  | 10 | 27 C | 0.0006386 |
| rs4712111   | 6 | 55887274 A  | 10 | 27 G | 0.0006386 |
| rs11970687  | 6 | 56041487 G  | 20 | 38 C | 0.0009963 |
| 6:64251929  | 6 | 64251929 G  | 16 | 2 T  | 0.0008956 |

|             |   |                |    |      |           |
|-------------|---|----------------|----|------|-----------|
| rs72875947  | 6 | 65698962 T     | 0  | 9 C  | 0.0009641 |
| rs2273428   | 6 | 70643018 G     | 25 | 48 A | 0.0003878 |
| rs9360410   | 6 | 70652566 A     | 29 | 48 G | 0.0005332 |
| rs3805963   | 6 | 70654658 A     | 29 | 48 G | 0.0005332 |
| rs960816    | 6 | 71008490 T     | 21 | 4 C  | 0.0008104 |
| rs9354912   | 6 | 71008745 G     | 21 | 4 A  | 0.0008104 |
| rs9446281   | 6 | 71331307 G     | 0  | 10 A | 0.0004197 |
| 6:74067800  | 6 | 74067800 TTATC | 4  | 17 T | 0.0008872 |
| 6:74067804  | 6 | 74067804 C     | 4  | 17 T | 0.0008872 |
| rs9447974   | 6 | 77836688 A     | 32 | 10 G | 0.000288  |
| 6:83237475  | 6 | 83237475 C     | 12 | 0 CT | 0.0003752 |
| 6:83546524  | 6 | 83546524 TG    | 14 | 1 T  | 0.0007094 |
| 6:83546527  | 6 | 83546527 TG    | 15 | 1 T  | 0.0003561 |
| rs1040544   | 6 | 83574391 C     | 51 | 24 T | 0.0003012 |
| rs220398    | 6 | 86826836 G     | 23 | 5 C  | 0.0006807 |
| rs220400    | 6 | 86839936 A     | 23 | 5 G  | 0.0006807 |
| rs11757976  | 6 | 88836870 G     | 35 | 12 A | 0.0004754 |
| 6:91579114  | 6 | 91579114 T     | 30 | 8 TC | 0.0003626 |
| rs12203938  | 6 | 93829029 G     | 0  | 9 T  | 0.0009641 |
| rs35031934  | 6 | 94141464 AT    | 40 | 16 A | 0.0005221 |
| rs591356    | 6 | 94162298 T     | 26 | 44 C | 0.0008911 |
| rs590881    | 6 | 94162429 A     | 26 | 44 T | 0.0008911 |
| rs684081    | 6 | 94163373 G     | 30 | 48 T | 0.0009571 |
| rs630517    | 6 | 94163617 G     | 30 | 48 A | 0.0009571 |
| rs655710    | 6 | 94165129 G     | 26 | 44 A | 0.0008911 |
| rs11463424  | 6 | 94165165 AT    | 30 | 48 A | 0.0009571 |
| rs674517    | 6 | 94165491 G     | 30 | 48 A | 0.0009571 |
| rs35984410  | 6 | 94165894 CA    | 30 | 48 C | 0.0009571 |
| rs643976    | 6 | 94167745 A     | 30 | 48 C | 0.0009571 |
| rs595153    | 6 | 94169456 C     | 30 | 48 T | 0.0009571 |
| rs491112    | 6 | 94169647 A     | 30 | 48 C | 0.0009571 |
| rs628135    | 6 | 94172250 T     | 26 | 44 G | 0.0008911 |
| rs662410    | 6 | 94172491 A     | 30 | 48 G | 0.0009571 |
| rs151250987 | 6 | 94172802 TCAGA | 30 | 48 T | 0.0009571 |
| rs644400    | 6 | 94174210 A     | 26 | 44 G | 0.0008911 |
| rs631463    | 6 | 94174854 T     | 26 | 44 C | 0.0008911 |
| rs619087    | 6 | 94175279 G     | 26 | 44 A | 0.0008911 |
| rs902160    | 6 | 94214998 A     | 15 | 33 G | 0.0005689 |
| rs9445122   | 6 | 94221770 A     | 16 | 34 G | 0.0006492 |
| rs9363086   | 6 | 94227308 G     | 16 | 34 T | 0.0006492 |
| rs7746862   | 6 | 94246104 C     | 16 | 34 T | 0.0006492 |

|            |   |             |    |       |           |
|------------|---|-------------|----|-------|-----------|
| rs2325505  | 6 | 94249481 C  | 16 | 34 G  | 0.0006492 |
| rs9345366  | 6 | 94249559 G  | 16 | 34 A  | 0.0006492 |
| rs9445132  | 6 | 94256087 A  | 16 | 34 G  | 0.0006492 |
| rs7758621  | 6 | 94262332 T  | 16 | 34 C  | 0.0006492 |
| rs1489818  | 6 | 94262344 T  | 16 | 34 C  | 0.0006492 |
| rs976765   | 6 | 94268297 G  | 16 | 34 A  | 0.0006492 |
| rs382257   | 6 | 95004088 C  | 9  | 26 T  | 0.0004896 |
| rs434310   | 6 | 95004561 A  | 9  | 26 G  | 0.0004896 |
| rs426370   | 6 | 95009400 A  | 9  | 27 G  | 0.0002633 |
| rs10944744 | 6 | 95190344 A  | 27 | 48 G  | 0.0001523 |
| rs9342418  | 6 | 95197387 C  | 25 | 46 T  | 0.0001445 |
| rs1022787  | 6 | 95202197 G  | 25 | 46 A  | 0.0001445 |
| rs222550   | 6 | 95211989 C  | 25 | 46 T  | 0.0001445 |
| rs222554   | 6 | 95214209 T  | 23 | 41 C  | 0.0008021 |
| rs222555   | 6 | 95215610 C  | 23 | 41 G  | 0.0008021 |
| rs222558   | 6 | 95216589 A  | 23 | 41 G  | 0.0008021 |
| rs1741377  | 6 | 95220828 A  | 23 | 41 C  | 0.0008021 |
| rs6929516  | 6 | 95220915 C  | 17 | 35 G  | 0.0007327 |
| rs2819971  | 6 | 95278063 G  | 51 | 24 T  | 0.0003012 |
| rs2750030  | 6 | 95278533 T  | 51 | 24 A  | 0.0003012 |
| rs6905809  | 6 | 95278921 C  | 11 | 31 A  | 0.0000622 |
| rs2224317  | 6 | 95285511 C  | 51 | 24 T  | 0.0003012 |
| rs2208170  | 6 | 95285661 A  | 51 | 24 T  | 0.0003012 |
| rs2750024  | 6 | 95303185 C  | 50 | 25 T  | 0.0009811 |
| rs2750023  | 6 | 95304525 A  | 50 | 25 C  | 0.0009811 |
| rs79731152 | 6 | 97223220 A  | 14 | 1 G   | 0.0007094 |
| rs946120   | 6 | 97544329 A  | 49 | 23 G  | 0.0005083 |
| rs34070466 | 6 | 97823031 AT | 8  | 24 A  | 0.0006758 |
| rs35795392 | 6 | 98054182 C  | 6  | 22 T  | 0.000342  |
| rs9398069  | 6 | 106601165 C | 24 | 44 T  | 0.0002594 |
| rs9372118  | 6 | 106601355 C | 24 | 44 A  | 0.0002594 |
| rs10717926 | 6 | 106604781 A | 26 | 44 AT | 0.0008911 |
| rs11755599 | 6 | 106847758 G | 5  | 20 T  | 0.0004383 |
| rs11153721 | 6 | 118424187 T | 30 | 9 C   | 0.0004612 |
| rs12209804 | 6 | 118424296 T | 30 | 9 A   | 0.0004612 |
| rs9387558  | 6 | 118426567 T | 30 | 9 A   | 0.0004612 |
| rs9387559  | 6 | 118426951 G | 30 | 9 A   | 0.0004612 |
| rs3924525  | 6 | 118427216 G | 45 | 19 C  | 0.0003833 |
| rs12194270 | 6 | 118430123 G | 30 | 9 A   | 0.0004612 |
| rs9320641  | 6 | 118434086 A | 30 | 9 G   | 0.0004612 |
| rs12204646 | 6 | 118434647 G | 30 | 9 T   | 0.0004612 |

|             |   |               |    |          |            |
|-------------|---|---------------|----|----------|------------|
| rs34666479  | 6 | 118435702 ATT | 30 | 9 A      | 0.0004612  |
| rs9387560   | 6 | 118435846 C   | 30 | 9 T      | 0.0004612  |
| rs12203615  | 6 | 118438261 T   | 30 | 9 C      | 0.0004612  |
| rs28817378  | 6 | 118448386 A   | 31 | 9 C      | 0.0002572  |
| rs11153723  | 6 | 118448635 C   | 31 | 9 G      | 0.0002572  |
| rs427474    | 6 | 118450944 T   | 31 | 9 C      | 0.0002572  |
| rs141635890 | 6 | 118452942 A   | 31 | 9 AATTAT | 0.0002572  |
| rs205975    | 6 | 118455142 G   | 32 | 9 T      | 0.0001413  |
| rs11334484  | 6 | 118459873 CT  | 32 | 9 C      | 0.0001413  |
| rs205972    | 6 | 118460362 A   | 32 | 9 G      | 0.0001413  |
| rs6910376   | 6 | 118460555 G   | 46 | 19 A     | 0.0002121  |
| rs2152076   | 6 | 118461619 C   | 46 | 19 T     | 0.0002121  |
| rs140772634 | 6 | 118461760 T   | 46 | 21 TG    | 0.0004215  |
| rs55845306  | 6 | 118461761 A   | 33 | 10 T     | 0.0001422  |
| rs56388357  | 6 | 118462096 G   | 46 | 19 T     | 0.0002121  |
| rs205971    | 6 | 118462913 G   | 32 | 9 A      | 0.0001413  |
| rs74384532  | 6 | 118463728 AT  | 46 | 19 A     | 0.0002121  |
| rs11756834  | 6 | 118465674 T   | 46 | 19 C     | 0.0002121  |
| rs11754433  | 6 | 118465941 G   | 46 | 19 A     | 0.0002121  |
| rs62423695  | 6 | 118466219 C   | 46 | 19 T     | 0.0002121  |
| rs12662262  | 6 | 118466410 C   | 46 | 19 T     | 0.0002121  |
| rs2051615   | 6 | 118467905 A   | 33 | 9 C      | 0.00007642 |
| rs6940272   | 6 | 118471856 T   | 46 | 19 C     | 0.0002121  |
| rs205968    | 6 | 118473563 C   | 32 | 9 T      | 0.0001413  |
| rs5005997   | 6 | 118474562 T   | 46 | 19 C     | 0.0002121  |
| rs205966    | 6 | 118475798 G   | 33 | 10 A     | 0.0003125  |
| rs12530139  | 6 | 129775084 A   | 4  | 18 T     | 0.0009446  |
| rs9402159   | 6 | 129982039 T   | 42 | 17 A     | 0.0003422  |
| rs9388722   | 6 | 129982285 G   | 42 | 15 A     | 0.0001339  |
| rs4482995   | 6 | 129984362 A   | 43 | 17 T     | 0.0001922  |
| rs13203844  | 6 | 129985147 C   | 43 | 17 T     | 0.0001922  |
| rs12193673  | 6 | 129985921 A   | 43 | 17 G     | 0.0001922  |
| rs9398914   | 6 | 129986453 G   | 39 | 16 C     | 0.0009032  |
| rs6899523   | 6 | 129986588 G   | 43 | 17 A     | 0.0001922  |
| rs6922711   | 6 | 129986792 C   | 43 | 17 T     | 0.0001922  |
| rs9402160   | 6 | 129987987 G   | 43 | 17 A     | 0.0001922  |
| rs11450417  | 6 | 129988030 GC  | 43 | 17 G     | 0.0001922  |
| rs6906744   | 6 | 129988135 T   | 43 | 17 C     | 0.0001922  |
| rs78917176  | 6 | 129988199 G   | 42 | 17 T     | 0.0003422  |
| rs79069340  | 6 | 129988200 A   | 42 | 17 T     | 0.0003422  |
| rs76543028  | 6 | 129988201 A   | 42 | 17 C     | 0.0003422  |

|             |   |              |    |      |            |
|-------------|---|--------------|----|------|------------|
| rs9398915   | 6 | 129988553 A  | 43 | 17 T | 0.0001922  |
| rs9402162   | 6 | 129988892 C  | 43 | 17 G | 0.0001922  |
| rs7750456   | 6 | 129989333 T  | 43 | 17 C | 0.0001922  |
| rs4379317   | 6 | 129989626 G  | 43 | 17 A | 0.0001922  |
| rs9375720   | 6 | 130835901 A  | 7  | 22 G | 0.0009169  |
| rs4521612   | 6 | 139052870 A  | 9  | 25 C | 0.0008942  |
| rs4285339   | 6 | 139053155 A  | 9  | 25 G | 0.0008942  |
| rs4896395   | 6 | 139054359 G  | 9  | 25 C | 0.0008942  |
| rs6570275   | 6 | 139059783 T  | 16 | 35 C | 0.000362   |
| rs76184559  | 6 | 142561359 G  | 11 | 0 T  | 0.0007855  |
| rs7765677   | 6 | 143259563 G  | 14 | 0 A  | 0.00008428 |
| rs78806794  | 6 | 143305594 A  | 16 | 2 C  | 0.0008956  |
| rs142413193 | 6 | 143320209 A  | 16 | 2 G  | 0.0008956  |
| rs10484586  | 6 | 143322428 T  | 16 | 2 C  | 0.0008956  |
| rs7739046   | 6 | 148098356 A  | 11 | 0 G  | 0.0007855  |
| rs7775245   | 6 | 148890218 T  | 22 | 41 C | 0.0004309  |
| rs73005910  | 6 | 150429880 A  | 16 | 1 C  | 0.0001772  |
| rs7758196   | 6 | 150445836 G  | 16 | 2 C  | 0.0008956  |
| rs13211170  | 6 | 152610972 G  | 28 | 8 A  | 0.0005481  |
| rs9383984   | 6 | 152626689 G  | 30 | 48 A | 0.0009571  |
| rs11453636  | 6 | 152734821 AG | 6  | 21 A | 0.0006518  |
| rs742784    | 6 | 152736737 C  | 8  | 24 A | 0.0006758  |
| rs761408    | 6 | 152736812 T  | 8  | 24 C | 0.0006758  |
| rs2092602   | 6 | 152737092 C  | 8  | 24 T | 0.0006758  |
| rs7738528   | 6 | 152738335 C  | 8  | 24 A | 0.0006758  |
| rs7738706   | 6 | 152738409 G  | 8  | 24 A | 0.0006758  |
| rs7756247   | 6 | 152738424 A  | 8  | 24 G | 0.0006758  |
| rs62426960  | 6 | 152738622 G  | 8  | 24 A | 0.0006758  |
| rs34651734  | 6 | 152740681 TA | 9  | 25 T | 0.0008942  |
| rs6557219   | 6 | 152743448 A  | 9  | 25 G | 0.0008942  |
| rs6913500   | 6 | 152744007 T  | 9  | 25 C | 0.0008942  |
| rs9479313   | 6 | 152744750 C  | 6  | 21 T | 0.0006518  |
| rs2295043   | 6 | 152764485 T  | 5  | 19 C | 0.0008415  |
| rs11753918  | 6 | 153504188 C  | 16 | 2 T  | 0.0008956  |
| rs9397270   | 6 | 156163798 C  | 51 | 25 T | 0.0005636  |
| rs4455684   | 6 | 156191577 G  | 44 | 19 T | 0.0006784  |
| rs6927902   | 6 | 156191899 C  | 44 | 19 G | 0.0006784  |
| rs9397272   | 6 | 156192287 A  | 44 | 19 G | 0.0006784  |
| rs9397859   | 6 | 156214337 G  | 29 | 47 C | 0.0009467  |
| rs13210479  | 6 | 159805224 C  | 35 | 13 T | 0.000996   |
| rs783176    | 6 | 161170835 G  | 17 | 2 A  | 0.000467   |

|             |   |              |    |      |            |
|-------------|---|--------------|----|------|------------|
| rs1084653   | 6 | 161182115 A  | 16 | 2 C  | 0.0008956  |
| rs35692234  | 6 | 161182859 CA | 16 | 2 C  | 0.0008956  |
| rs2465835   | 6 | 161186537 G  | 16 | 2 A  | 0.0008956  |
| rs2465836   | 6 | 161187044 A  | 16 | 2 G  | 0.0008956  |
| rs1271391   | 6 | 161190851 G  | 17 | 2 T  | 0.000467   |
| rs62436699  | 6 | 161190945 C  | 15 | 1 G  | 0.0003561  |
| rs1652498   | 6 | 161191645 G  | 17 | 2 T  | 0.000467   |
| rs36032205  | 6 | 161191858 A  | 17 | 2 AG | 0.000467   |
| rs1740447   | 6 | 161193779 A  | 17 | 2 G  | 0.000467   |
| rs1652501   | 6 | 161193959 G  | 17 | 2 C  | 0.000467   |
| rs1782602   | 6 | 161199887 A  | 18 | 3 G  | 0.0009486  |
| rs1740438   | 6 | 161199900 C  | 18 | 3 T  | 0.0009486  |
| rs1652489   | 6 | 161200191 A  | 17 | 2 G  | 0.000467   |
| rs1652492   | 6 | 161201024 A  | 17 | 2 G  | 0.000467   |
| rs1367216   | 6 | 161203454 C  | 17 | 2 T  | 0.000467   |
| rs1740430   | 6 | 161211997 A  | 17 | 2 G  | 0.000467   |
| rs1652456   | 6 | 161215051 T  | 17 | 2 A  | 0.000467   |
| rs1247572   | 6 | 161222490 G  | 17 | 2 A  | 0.000467   |
| rs1740466   | 6 | 161225836 T  | 17 | 2 C  | 0.000467   |
| rs145349920 | 6 | 161225900 TA | 17 | 2 T  | 0.000467   |
| rs34026567  | 6 | 161225901 G  | 17 | 2 T  | 0.000467   |
| rs74196484  | 6 | 161268783 A  | 18 | 3 G  | 0.0009486  |
| rs2489929   | 6 | 161270781 T  | 18 | 3 C  | 0.0009486  |
| rs9347601   | 6 | 162636810 C  | 10 | 30 G | 0.00009899 |
| rs4235934   | 6 | 162645907 G  | 25 | 43 T | 0.0008649  |
| rs7771463   | 6 | 162659272 C  | 6  | 21 G | 0.0006518  |
| rs12203066  | 6 | 162660066 A  | 6  | 21 G | 0.0006518  |
| rs12175150  | 6 | 162661445 C  | 6  | 21 G | 0.0006518  |
| rs7750058   | 6 | 162684854 T  | 1  | 12 C | 0.0007887  |
| rs79711914  | 6 | 162687612 T  | 1  | 12 C | 0.0007887  |
| rs9347607   | 6 | 162689104 A  | 1  | 12 T | 0.0007887  |
| rs7744581   | 6 | 162691033 T  | 1  | 12 C | 0.0007887  |
| rs11969329  | 6 | 162693329 A  | 1  | 12 C | 0.0007887  |
| rs9355996   | 6 | 162696005 T  | 1  | 12 C | 0.0007887  |
| rs9347610   | 6 | 162702832 T  | 1  | 12 C | 0.0007887  |
| rs9355394   | 6 | 162703082 T  | 1  | 12 C | 0.0007887  |
| rs9364645   | 6 | 162705879 C  | 1  | 12 T | 0.0007887  |
| rs7740578   | 6 | 162708551 C  | 1  | 12 G | 0.0007887  |
| rs74352937  | 6 | 162709548 T  | 1  | 12 C | 0.0007887  |
| rs77424716  | 6 | 162712953 G  | 0  | 9 A  | 0.0009641  |
| rs77743401  | 6 | 162714571 T  | 0  | 9 C  | 0.0009641  |

|             |   |             |    |                  |            |
|-------------|---|-------------|----|------------------|------------|
| rs9347613   | 6 | 162714980 T | 0  | 9 G              | 0.0009641  |
| rs9355999   | 6 | 162716154 A | 0  | 9 G              | 0.0009641  |
| rs79581497  | 6 | 169081533 G | 0  | 9 A              | 0.0009641  |
| rs76675635  | 6 | 169902302 A | 5  | 19 G             | 0.0008415  |
| rs140215843 | 6 | 169929414 C | 0  | 10 G             | 0.0004292  |
| rs71010609  | 6 | 169990056 C | 0  | 9 CAACAAGTCCTGA  | 0.0009641  |
| rs34574309  | 7 | 7782647 CTA | 47 | 22 C             | 0.0008379  |
| rs4725022   | 7 | 7782661 A   | 47 | 22 G             | 0.0008379  |
| rs2024372   | 7 | 7782919 A   | 54 | 26 G             | 0.0001819  |
| rs2024373   | 7 | 7782982 A   | 54 | 26 G             | 0.0001819  |
| rs138239053 | 7 | 7783317 G   | 54 | 26 GTATATGTATATG | 0.0001819  |
| rs2110556   | 7 | 7783587 A   | 54 | 26 G             | 0.0001819  |
| rs12702642  | 7 | 7783919 T   | 54 | 26 C             | 0.0001819  |
| rs35562533  | 7 | 7784322 A   | 55 | 26 G             | 0.00009769 |
| rs2189906   | 7 | 8464974 G   | 28 | 6 A              | 0.00008463 |
| rs2214790   | 7 | 10075603 G  | 0  | 9 A              | 0.0009641  |
| rs4029461   | 7 | 11393850 C  | 26 | 6 G              | 0.000291   |
| 7:13658741  | 7 | 13658741 C  | 0  | 10 T             | 0.0004292  |
| rs12699545  | 7 | 13796604 T  | 26 | 7 A              | 0.0007902  |
| rs17732862  | 7 | 13815500 A  | 28 | 8 C              | 0.0006092  |
| rs35329533  | 7 | 13821882 A  | 29 | 8 G              | 0.0003391  |
| rs17167515  | 7 | 13822225 T  | 28 | 8 C              | 0.0006092  |
| rs11980595  | 7 | 13822381 C  | 28 | 8 T              | 0.0006092  |
| rs11980617  | 7 | 13822453 C  | 28 | 8 T              | 0.0006092  |
| rs11980650  | 7 | 13822542 C  | 28 | 8 T              | 0.0006092  |
| rs73062249  | 7 | 13825205 C  | 26 | 7 T              | 0.0007902  |
| rs6949431   | 7 | 13825628 A  | 26 | 7 G              | 0.0007902  |
| rs35336443  | 7 | 13826075 CA | 26 | 7 C              | 0.0007902  |
| rs35166573  | 7 | 13826104 A  | 26 | 7 AAT            | 0.0007902  |
| rs186715394 | 7 | 18079316 C  | 0  | 9 T              | 0.0009641  |
| rs2704280   | 7 | 18640746 T  | 31 | 49 C             | 0.0009634  |
| rs4719620   | 7 | 20637759 T  | 27 | 47 G             | 0.0002837  |
| 7:20720623  | 7 | 20720623 T  | 12 | 0 TTC            | 0.000374   |
| rs9691059   | 7 | 21429939 C  | 5  | 19 T             | 0.0008415  |
| 7:26066689  | 7 | 26066689 G  | 16 | 2 A              | 0.0008956  |
| rs12333975  | 7 | 29549336 C  | 14 | 31 T             | 0.0008795  |
| rs2302617   | 7 | 29605935 A  | 21 | 4 G              | 0.0008104  |
| rs28362687  | 7 | 30949949 T  | 1  | 12 A             | 0.0007887  |
| rs55867525  | 7 | 37271619 A  | 19 | 3 G              | 0.0005082  |
| rs4723843   | 7 | 39337424 A  | 21 | 4 G              | 0.0008104  |
| rs11310175  | 7 | 39351788 GA | 21 | 4 G              | 0.0008104  |



|             |   |             |    |        |            |
|-------------|---|-------------|----|--------|------------|
| rs2329396   | 7 | 39534540 A  | 47 | 21 G   | 0.0004473  |
| rs370564210 | 7 | 47045993 A  | 2  | 14 T   | 0.0009649  |
| rs34778134  | 7 | 47099416 G  | 14 | 1 A    | 0.0007094  |
| rs56017904  | 7 | 47100078 T  | 14 | 1 C    | 0.0007094  |
| rs55710472  | 7 | 47122464 T  | 19 | 2 C    | 0.0001229  |
| rs71545970  | 7 | 47122753 C  | 19 | 2 G    | 0.0001229  |
| rs71545971  | 7 | 47124934 C  | 19 | 2 T    | 0.0001229  |
| rs13228000  | 7 | 47126710 G  | 19 | 2 A    | 0.0001229  |
| rs12155121  | 7 | 47127677 A  | 19 | 2 G    | 0.0001229  |
| rs34740359  | 7 | 47128115 C  | 19 | 2 T    | 0.0001229  |
| rs17446835  | 7 | 47128635 C  | 19 | 2 T    | 0.0001229  |
| rs12155471  | 7 | 47129422 G  | 19 | 2 A    | 0.0001229  |
| rs35849184  | 7 | 47130395 CG | 19 | 2 C    | 0.0001229  |
| rs34436300  | 7 | 47134660 A  | 19 | 2 G    | 0.0001229  |
| rs34644289  | 7 | 47134989 G  | 19 | 2 C    | 0.0001229  |
| rs369251775 | 7 | 47136324 G  | 16 | 2 GA   | 0.0007358  |
| rs11524610  | 7 | 47136472 G  | 18 | 2 T    | 0.0002408  |
| rs10499651  | 7 | 47137770 A  | 18 | 2 G    | 0.0002408  |
| rs35173793  | 7 | 47141298 A  | 18 | 2 G    | 0.0002408  |
| rs35305609  | 7 | 47143515 G  | 18 | 2 A    | 0.0002408  |
| rs71545975  | 7 | 47144505 A  | 16 | 1 G    | 0.000157   |
| rs75843596  | 7 | 47145560 A  | 17 | 2 G    | 0.000467   |
| rs76840621  | 7 | 47146824 A  | 17 | 2 G    | 0.000467   |
| rs35013724  | 7 | 47148436 G  | 17 | 2 T    | 0.000467   |
| rs35341942  | 7 | 47151123 T  | 20 | 1 TA   | 0.00009827 |
| rs4557608   | 7 | 47154807 C  | 22 | 3 T    | 0.0001254  |
| rs11767755  | 7 | 47155356 A  | 22 | 3 G    | 0.0001254  |
| rs35325414  | 7 | 47156676 C  | 17 | 2 T    | 0.000467   |
| rs62447756  | 7 | 47790222 A  | 5  | 19 C   | 0.0008415  |
| rs138331667 | 7 | 47792185 T  | 5  | 19 TG  | 0.0008415  |
| rs146000028 | 7 | 47794674 G  | 5  | 19 GAC | 0.0008415  |
| 7:48259483  | 7 | 48259483 C  | 9  | 27 A   | 0.0001402  |
| rs11238176  | 7 | 52169286 T  | 43 | 19 C   | 0.000761   |
| rs12532936  | 7 | 52169566 C  | 43 | 19 T   | 0.000761   |
| rs10250775  | 7 | 52169733 G  | 43 | 19 A   | 0.000761   |
| rs4409354   | 7 | 52170775 T  | 43 | 19 C   | 0.000761   |
| rs4458824   | 7 | 52170783 T  | 43 | 19 C   | 0.000761   |
| rs4431548   | 7 | 52170869 G  | 43 | 19 A   | 0.000761   |
| rs145770713 | 7 | 52170905 G  | 43 | 19 C   | 0.000761   |
| rs150374058 | 7 | 52171600 A  | 43 | 19 C   | 0.000761   |
| rs7808254   | 7 | 52171697 G  | 43 | 19 A   | 0.000761   |

|             |   |             |    |       |           |
|-------------|---|-------------|----|-------|-----------|
| rs2465787   | 7 | 52172110 C  | 43 | 19 T  | 0.000761  |
| rs2952746   | 7 | 52172843 G  | 43 | 19 A  | 0.000761  |
| rs4593482   | 7 | 52173068 G  | 43 | 19 A  | 0.000761  |
| rs148576852 | 7 | 52173272 A  | 43 | 19 G  | 0.000761  |
| rs114982018 | 7 | 52173431 C  | 43 | 19 T  | 0.000761  |
| rs4349936   | 7 | 52174104 G  | 44 | 19 A  | 0.0006784 |
| rs200757191 | 7 | 52174329 TA | 43 | 19 T  | 0.000761  |
| rs62465899  | 7 | 52175671 A  | 42 | 18 G  | 0.0006782 |
| rs56383811  | 7 | 52176496 C  | 42 | 18 G  | 0.0006782 |
| rs10235638  | 7 | 66396940 T  | 2  | 14 C  | 0.0009649 |
| rs35558090  | 7 | 68080571 A  | 4  | 18 G  | 0.0009242 |
| rs57967069  | 7 | 68081476 C  | 11 | 28 T  | 0.0008103 |
| rs34518399  | 7 | 68083072 A  | 11 | 28 G  | 0.0008103 |
| rs71565192  | 7 | 68083585 T  | 11 | 28 C  | 0.0008103 |
| rs35952740  | 7 | 68089016 CA | 25 | 43 C  | 0.0008649 |
| rs36119273  | 7 | 68090225 T  | 4  | 22 C  | 0.0003217 |
| rs4717464   | 7 | 68090345 T  | 4  | 22 C  | 0.0003217 |
| rs12672169  | 7 | 68090829 C  | 5  | 22 T  | 0.0005146 |
| rs35900028  | 7 | 68816739 T  | 4  | 18 C  | 0.0009242 |
| rs2271032   | 7 | 68824095 G  | 4  | 18 A  | 0.0009242 |
| rs34786963  | 7 | 68838684 C  | 4  | 18 T  | 0.0009242 |
| rs1981586   | 7 | 68926224 G  | 9  | 26 A  | 0.0004896 |
| rs1981585   | 7 | 68927887 G  | 9  | 25 A  | 0.0008942 |
| rs12155091  | 7 | 68928747 G  | 9  | 26 A  | 0.0004896 |
| rs115881004 | 7 | 68928894 T  | 4  | 20 C  | 0.0001364 |
| rs56854903  | 7 | 68931329 A  | 9  | 25 G  | 0.0008942 |
| rs71529974  | 7 | 68932680 G  | 9  | 26 GT | 0.0004896 |
| rs55714924  | 7 | 68933489 C  | 9  | 26 G  | 0.0004896 |
| rs10240224  | 7 | 68934595 A  | 9  | 26 G  | 0.0004896 |
| rs34117578  | 7 | 68935787 G  | 9  | 26 A  | 0.0004896 |
| rs35816055  | 7 | 68935965 A  | 9  | 26 G  | 0.0004896 |
| rs35611343  | 7 | 68936196 G  | 9  | 26 A  | 0.0004896 |
| rs2865169   | 7 | 68936682 G  | 9  | 26 A  | 0.0004896 |
| rs6975413   | 7 | 68937195 A  | 9  | 26 T  | 0.0004896 |
| rs7778427   | 7 | 68939463 G  | 9  | 26 A  | 0.0004896 |
| rs6954006   | 7 | 68940427 C  | 9  | 26 T  | 0.0004896 |
| rs6460521   | 7 | 68941883 A  | 9  | 26 G  | 0.0004896 |
| rs7810187   | 7 | 68941907 T  | 9  | 26 C  | 0.0004896 |
| rs6979168   | 7 | 68942454 G  | 9  | 26 C  | 0.0004896 |
| rs6944163   | 7 | 68942783 A  | 9  | 26 G  | 0.0004896 |
| rs13226730  | 7 | 68943771 G  | 9  | 26 C  | 0.0004896 |

|            |   |                  |    |      |            |
|------------|---|------------------|----|------|------------|
| rs13243683 | 7 | 68943772 C       | 9  | 26 T | 0.0004896  |
| rs6951565  | 7 | 68944272 T       | 9  | 26 C | 0.0004896  |
| rs55651041 | 7 | 68945496 T       | 9  | 26 A | 0.0004896  |
| rs56919232 | 7 | 68945647 C       | 9  | 26 T | 0.0004896  |
| rs3944102  | 7 | 68948035 C       | 4  | 21 T | 0.00006677 |
| rs7797579  | 7 | 68948713 G       | 9  | 26 A | 0.0004896  |
| rs10233616 | 7 | 68950148 T       | 9  | 26 C | 0.0004896  |
| rs6960026  | 7 | 68950843 T       | 9  | 26 C | 0.0004896  |
| rs6979837  | 7 | 68950969 G       | 4  | 20 A | 0.0001364  |
| rs10256483 | 7 | 68951431 C       | 9  | 26 T | 0.0004896  |
| rs6460522  | 7 | 68955922 A       | 9  | 25 G | 0.0008322  |
| 7:68958082 | 7 | 68958082 ATTTTAT | 4  | 20 A | 0.0001364  |
| rs28758447 | 7 | 68958234 C       | 9  | 26 T | 0.0004896  |
| rs76969251 | 7 | 68959199 C       | 4  | 20 T | 0.0001364  |
| rs73437648 | 7 | 68959257 G       | 9  | 26 A | 0.0004896  |
| rs10257731 | 7 | 68961448 T       | 9  | 26 C | 0.0004896  |
| rs11772497 | 7 | 68962023 T       | 9  | 26 A | 0.0004896  |
| rs2865170  | 7 | 68963429 G       | 9  | 26 T | 0.0004896  |
| rs13239400 | 7 | 68965320 A       | 9  | 26 G | 0.0004896  |
| rs10278143 | 7 | 68966004 G       | 9  | 26 C | 0.0004896  |
| rs35187398 | 7 | 68968364 T       | 4  | 18 C | 0.0003832  |
| rs17137493 | 7 | 68968622 T       | 9  | 26 C | 0.0004896  |
| rs62454904 | 7 | 68968729 T       | 45 | 20 C | 0.0007326  |
| rs4268006  | 7 | 68969459 A       | 9  | 26 G | 0.0004896  |
| rs35960270 | 7 | 68970424 G       | 4  | 20 A | 0.0001364  |
| rs10950190 | 7 | 68971141 G       | 9  | 26 A | 0.0004896  |
| rs7785268  | 7 | 68974859 A       | 9  | 25 T | 0.0008942  |
| rs2108046  | 7 | 68976811 G       | 10 | 27 T | 0.0006523  |
| rs35351867 | 7 | 68977045 T       | 4  | 20 C | 0.0001364  |
| rs34824391 | 7 | 68978353 A       | 4  | 20 G | 0.0001364  |
| rs12538348 | 7 | 68982336 A       | 9  | 26 T | 0.0004896  |
| rs57286442 | 7 | 68982375 C       | 45 | 20 T | 0.0007326  |
| rs1541427  | 7 | 68983295 G       | 9  | 26 A | 0.0004896  |
| rs35241473 | 7 | 68985852 C       | 4  | 20 T | 0.0001364  |
| rs34650051 | 7 | 68986840 A       | 4  | 20 G | 0.0001364  |
| rs34201872 | 7 | 68987407 T       | 4  | 20 C | 0.0001364  |
| rs10265122 | 7 | 68991223 A       | 9  | 26 C | 0.0004896  |
| rs12531644 | 7 | 68993388 T       | 6  | 24 A | 0.00008411 |
| rs11771876 | 7 | 68993473 A       | 9  | 26 C | 0.0004896  |
| rs34387293 | 7 | 68994072 A       | 4  | 20 G | 0.0001364  |
| rs17140651 | 7 | 68995564 A       | 4  | 20 G | 0.0001364  |

|             |   |            |    |       |            |
|-------------|---|------------|----|-------|------------|
| rs12698803  | 7 | 68997721 C | 9  | 26 T  | 0.0004896  |
| rs41862     | 7 | 69001467 A | 9  | 26 G  | 0.0004896  |
| rs10487947  | 7 | 69004381 A | 4  | 20 G  | 0.0001364  |
| rs12698804  | 7 | 69004448 G | 9  | 26 A  | 0.0004896  |
| rs41857     | 7 | 69008652 T | 4  | 20 C  | 0.0001364  |
| rs41854     | 7 | 69011346 T | 4  | 19 C  | 0.0004818  |
| rs41853     | 7 | 69011542 C | 9  | 27 A  | 0.0002633  |
| rs41848     | 7 | 69016574 A | 4  | 21 T  | 0.00006677 |
| rs12670658  | 7 | 69033897 T | 5  | 20 C  | 0.0003688  |
| rs6966052   | 7 | 69035699 A | 44 | 19 G  | 0.0006784  |
| rs1029811   | 7 | 69037529 T | 5  | 21 G  | 0.0002243  |
| rs2851493   | 7 | 69048815 T | 4  | 21 G  | 0.00006677 |
| rs2851520   | 7 | 69054756 C | 4  | 21 T  | 0.00006677 |
| rs1003404   | 7 | 69054960 T | 4  | 21 C  | 0.00006677 |
| rs56000336  | 7 | 75628874 T | 11 | 29 TA | 0.00087    |
| rs10954750  | 7 | 75664921 C | 37 | 12 G  | 0.0001447  |
| rs10255591  | 7 | 75746409 C | 32 | 10 T  | 0.0003432  |
| rs55671363  | 7 | 75793405 C | 32 | 10 T  | 0.0003432  |
| rs112442379 | 7 | 75837823 C | 27 | 7 CA  | 0.000799   |
| rs111831719 | 7 | 75845457 C | 29 | 9 A   | 0.0008145  |
| rs3960554   | 7 | 75845597 T | 29 | 9 G   | 0.0008145  |
| rs78663390  | 7 | 75845837 A | 29 | 9 C   | 0.0008145  |
| rs10952869  | 7 | 75846453 G | 33 | 10 A  | 0.0003125  |
| rs6465036   | 7 | 75859296 G | 34 | 12 A  | 0.000839   |
| rs3807880   | 7 | 75864208 C | 35 | 12 T  | 0.0004754  |
| rs4727116   | 7 | 75869398 T | 34 | 12 C  | 0.000839   |
| rs10464565  | 7 | 75869526 G | 35 | 13 T  | 0.000996   |
| rs7782880   | 7 | 75871871 G | 35 | 13 A  | 0.000996   |
| rs1894761   | 7 | 75876754 C | 35 | 13 T  | 0.000996   |
| rs7777955   | 7 | 75879792 T | 35 | 13 C  | 0.000996   |
| rs11973658  | 7 | 75882026 C | 35 | 13 A  | 0.000996   |
| rs67387111  | 7 | 75883092 C | 34 | 12 T  | 0.0004329  |
| rs6978164   | 7 | 75887815 G | 35 | 13 A  | 0.000996   |
| rs6465068   | 7 | 75894946 A | 35 | 13 G  | 0.000996   |
| rs17802047  | 7 | 79632465 T | 4  | 18 C  | 0.0009242  |
| rs55836816  | 7 | 79634512 G | 4  | 18 A  | 0.0009242  |
| rs17802148  | 7 | 79636682 C | 4  | 18 T  | 0.0009242  |
| rs146184091 | 7 | 79638491 A | 4  | 18 AC | 0.0009242  |
| rs56057150  | 7 | 79638737 T | 4  | 18 C  | 0.0009242  |
| rs62461708  | 7 | 79644665 G | 4  | 18 A  | 0.0009242  |
| rs34568037  | 7 | 79649750 C | 4  | 18 G  | 0.0009242  |

|             |   |             |    |        |            |
|-------------|---|-------------|----|--------|------------|
| rs55947746  | 7 | 79656124 A  | 4  | 18 G   | 0.0009242  |
| rs62461712  | 7 | 79657182 T  | 4  | 18 G   | 0.0009242  |
| rs2435272   | 7 | 85007066 T  | 23 | 41 G   | 0.0008021  |
| rs2463468   | 7 | 85009349 T  | 23 | 41 C   | 0.0008021  |
| rs2030624   | 7 | 85013958 C  | 23 | 41 T   | 0.0008021  |
| rs2463475   | 7 | 85016000 T  | 23 | 41 C   | 0.0008021  |
| rs2462058   | 7 | 85019297 T  | 23 | 41 A   | 0.0008021  |
| rs1403785   | 7 | 85021953 A  | 23 | 41 G   | 0.0008021  |
| rs2462057   | 7 | 85024037 T  | 23 | 41 C   | 0.0008021  |
| rs1960550   | 7 | 85024643 T  | 23 | 41 C   | 0.0008021  |
| rs2077770   | 7 | 85026097 T  | 23 | 41 A   | 0.0008021  |
| rs1583081   | 7 | 85034227 T  | 23 | 41 G   | 0.0008021  |
| rs2463480   | 7 | 85036389 T  | 23 | 41 C   | 0.0008021  |
| rs2435264   | 7 | 85036405 T  | 23 | 41 A   | 0.0008021  |
| rs148525782 | 7 | 85045118 A  | 23 | 41 AT  | 0.0008021  |
| rs112461735 | 7 | 85045121 C  | 23 | 41 A   | 0.0008021  |
| rs2462049   | 7 | 85099898 G  | 24 | 43 T   | 0.000471   |
| rs6944685   | 7 | 85356747 T  | 41 | 16 C   | 0.0002964  |
| rs12532025  | 7 | 88782746 G  | 19 | 3 A    | 0.0005082  |
| rs12670534  | 7 | 93403525 G  | 24 | 42 T   | 0.0008352  |
| rs2724119   | 7 | 93405685 G  | 30 | 48 A   | 0.0009571  |
| rs7803982   | 7 | 93405960 T  | 23 | 42 C   | 0.0007426  |
| 7:96459804  | 7 | 96459804 C  | 0  | 10 A   | 0.0004292  |
| rs77317590  | 7 | 98729318 T  | 0  | 9 C    | 0.0009641  |
| rs10226446  | 7 | 98832759 T  | 1  | 16 C   | 0.00003625 |
| rs369645786 | 7 | 98832779 T  | 3  | 21 C   | 0.00002955 |
| rs6947597   | 7 | 108795622 A | 30 | 9 G    | 0.0004612  |
| rs7782912   | 7 | 108892907 C | 28 | 8 T    | 0.0006092  |
| rs38756     | 7 | 109939445 T | 24 | 5 G    | 0.0003659  |
| rs4727743   | 7 | 110332746 A | 55 | 27 G   | 0.0002959  |
| rs7802317   | 7 | 110373310 T | 21 | 40 A   | 0.0006238  |
| rs7802964   | 7 | 110373541 A | 22 | 41 G   | 0.0007034  |
| rs10246851  | 7 | 112126180 G | 3  | 16 T   | 0.0009912  |
| rs62474609  | 7 | 112126553 T | 3  | 16 C   | 0.0009912  |
| rs62474610  | 7 | 112126570 A | 3  | 16 G   | 0.0009912  |
| rs1449955   | 7 | 112628422 T | 32 | 50 C   | 0.0009655  |
| rs36091121  | 7 | 112700129 C | 53 | 27 CCT | 0.0006109  |
| rs2950815   | 7 | 121045761 A | 7  | 23 G   | 0.0005345  |
| rs10261193  | 7 | 121246641 A | 0  | 9 G    | 0.0009641  |
| rs10236326  | 7 | 121248173 G | 0  | 9 A    | 0.0009641  |
| rs149552905 | 7 | 121251931 A | 0  | 9 AT   | 0.0009641  |

|             |   |                       |    |      |           |
|-------------|---|-----------------------|----|------|-----------|
| rs10716875  | 7 | 122549304 A           | 25 | 5 AT | 0.0001938 |
| rs17145186  | 7 | 122601667 A           | 24 | 5 G  | 0.0003659 |
| rs60189483  | 7 | 122603051 CT          | 24 | 5 C  | 0.0003659 |
| rs7784430   | 7 | 122606768 T           | 24 | 5 C  | 0.0003659 |
| rs6466846   | 7 | 122607937 A           | 24 | 5 G  | 0.0003659 |
| rs719605    | 7 | 122613859 C           | 24 | 5 T  | 0.0003659 |
| rs56758994  | 7 | 122619777 C           | 24 | 5 T  | 0.0003659 |
| rs17145243  | 7 | 122625340 G           | 24 | 5 A  | 0.0003659 |
| rs67821149  | 7 | 122628392 A           | 24 | 5 G  | 0.0003659 |
| rs7785882   | 7 | 122629498 G           | 24 | 5 A  | 0.0003659 |
| rs11976579  | 7 | 122630605 A           | 24 | 5 G  | 0.0003659 |
| rs66848408  | 7 | 122634291 T           | 24 | 5 G  | 0.0003659 |
| rs57442727  | 7 | 122638866 G           | 23 | 5 A  | 0.0006807 |
| rs66998911  | 7 | 122645102 G           | 24 | 5 A  | 0.0003659 |
| rs75158299  | 7 | 122647543 G           | 24 | 5 GA | 0.0003659 |
| rs2222610   | 7 | 122647812 T           | 24 | 5 A  | 0.0003659 |
| rs11983656  | 7 | 122648709 T           | 24 | 5 C  | 0.0003659 |
| rs67390806  | 7 | 122650589 A           | 24 | 5 G  | 0.0003659 |
| rs66972046  | 7 | 122651571 C           | 24 | 5 T  | 0.0003659 |
| rs55772605  | 7 | 122668336 G           | 24 | 5 T  | 0.0003659 |
| rs73217748  | 7 | 122738762 G           | 34 | 12 A | 0.000839  |
| rs10953972  | 7 | 122749779 T           | 30 | 9 C  | 0.0004612 |
| rs112153839 | 7 | 122787591 CCT         | 38 | 15 C | 0.0007851 |
| rs7804180   | 7 | 122790130 C           | 38 | 15 T | 0.0007851 |
| rs6953295   | 7 | 122807917 T           | 29 | 8 C  | 0.0003391 |
| rs11976455  | 7 | 122808528 G           | 30 | 8 A  | 0.0001859 |
| rs12706504  | 7 | 122901493 A           | 35 | 12 T | 0.0004754 |
| 7:123237974 | 7 | 123237974 GTGTGTGTGTA | 0  | 11 G | 0.0002178 |
| rs17147421  | 7 | 124383948 A           | 11 | 28 G | 0.000811  |
| rs73227503  | 7 | 124721044 G           | 12 | 31 A | 0.0003217 |
| rs12056290  | 7 | 124757562 C           | 15 | 33 T | 0.0005689 |
| rs66787780  | 7 | 124791849 A           | 14 | 32 G | 0.0004925 |
| rs67454509  | 7 | 124792500 G           | 14 | 32 A | 0.0004925 |
| rs59635547  | 7 | 124796371 C           | 14 | 32 A | 0.0004925 |
| rs68148969  | 7 | 124796408 G           | 14 | 32 C | 0.0004925 |
| rs17387591  | 7 | 124799471 C           | 14 | 32 T | 0.0004925 |
| rs67673811  | 7 | 124802694 G           | 14 | 32 C | 0.0004925 |
| rs702427    | 7 | 124802831 T           | 17 | 35 A | 0.0007327 |
| rs650030    | 7 | 124803703 G           | 19 | 37 A | 0.0009069 |
| rs648619    | 7 | 124803868 A           | 28 | 47 G | 0.0005255 |
| rs651332    | 7 | 124804423 A           | 28 | 47 G | 0.0005255 |

|             |   |                |    |          |            |
|-------------|---|----------------|----|----------|------------|
| rs67313231  | 7 | 124804532 A    | 14 | 33 T     | 0.0002703  |
| rs61068276  | 7 | 124804887 T    | 23 | 43 C     | 0.0002487  |
| rs35642992  | 7 | 124806186 GA   | 28 | 47 G     | 0.0005255  |
| rs1728929   | 7 | 124808930 A    | 28 | 47 G     | 0.0005255  |
| rs1728930   | 7 | 124809310 A    | 28 | 47 G     | 0.0005255  |
| rs2968865   | 7 | 124810399 A    | 28 | 47 G     | 0.0005255  |
| rs1991409   | 7 | 124923489 C    | 11 | 28 G     | 0.0008103  |
| rs4728020   | 7 | 124926770 T    | 11 | 28 C     | 0.0008103  |
| rs28645171  | 7 | 124927862 T    | 17 | 35 C     | 0.0007327  |
| rs9784927   | 7 | 124928978 A    | 17 | 36 C     | 0.0004114  |
| rs34927113  | 7 | 133325624 TC   | 50 | 24 T     | 0.0007955  |
| rs73152980  | 7 | 133464988 A    | 2  | 15 C     | 0.0005115  |
| rs4236486   | 7 | 139992324 T    | 39 | 13 C     | 0.00009633 |
| rs4236487   | 7 | 139992334 A    | 39 | 13 G     | 0.00009633 |
| rs4726753   | 7 | 139992554 T    | 39 | 12 C     | 0.00004106 |
| rs62491836  | 7 | 139994133 A    | 39 | 12 G     | 0.00004106 |
| rs79337537  | 7 | 140818880 G    | 15 | 1 A      | 0.0003561  |
| rs58091278  | 7 | 140820604 A    | 15 | 1 AT     | 0.0003561  |
| 7:142216423 | 7 | 142216423 T    | 17 | 2 TCCAGC | 0.0009658  |
| 7:142216431 | 7 | 142216431 T    | 16 | 2 C      | 0.0008912  |
| 7:142216433 | 7 | 142216433 GTTA | 16 | 2 G      | 0.0008912  |
| rs17798068  | 7 | 144877432 T    | 28 | 8 C      | 0.0006092  |
| rs13234300  | 7 | 144882368 A    | 25 | 4 G      | 0.00005893 |
| rs10228815  | 7 | 144882889 G    | 23 | 4 T      | 0.0001164  |
| rs71528967  | 7 | 144884334 A    | 24 | 4 G      | 0.0001159  |
| rs7799776   | 7 | 144888698 T    | 24 | 4 C      | 0.0001159  |
| rs7788595   | 7 | 144893242 A    | 24 | 4 C      | 0.0001159  |
| rs34694182  | 7 | 144893767 A    | 25 | 6 AT     | 0.0005533  |
| rs2371843   | 7 | 144895554 A    | 21 | 3 G      | 0.0002475  |
| rs2371844   | 7 | 144895575 A    | 21 | 3 G      | 0.0002475  |
| rs12703663  | 7 | 144895979 G    | 21 | 3 A      | 0.0002475  |
| rs13247774  | 7 | 144896721 A    | 21 | 3 G      | 0.0002475  |
| rs150195176 | 7 | 144911246 T    | 21 | 3 C      | 0.0002475  |
| rs12703667  | 7 | 144915712 T    | 21 | 4 C      | 0.0008104  |
| rs12703668  | 7 | 144938998 C    | 20 | 3 T      | 0.000269   |
| rs66706284  | 7 | 144946452 A    | 21 | 3 G      | 0.0002475  |
| rs73170827  | 7 | 144947604 T    | 16 | 2 A      | 0.0008956  |
| rs34223395  | 7 | 144950375 T    | 21 | 3 C      | 0.0002475  |
| rs12703672  | 7 | 144965537 C    | 22 | 3 A      | 0.0001254  |
| rs77056733  | 7 | 150961048 C    | 15 | 0 T      | 0.00003963 |
| rs75368642  | 7 | 150969808 T    | 15 | 0 C      | 0.00003963 |

|             |   |             |    |                 |           |
|-------------|---|-------------|----|-----------------|-----------|
| rs7796815   | 7 | 152731524 G | 5  | 19 T            | 0.0008415 |
| rs11768300  | 7 | 152731623 G | 5  | 19 C            | 0.0008415 |
| rs11772024  | 7 | 152731636 C | 5  | 19 T            | 0.0008415 |
| rs10262292  | 7 | 152732059 T | 5  | 19 C            | 0.0008415 |
| rs6967853   | 7 | 152737574 C | 4  | 18 T            | 0.0009242 |
| rs6967855   | 7 | 152737578 C | 4  | 18 T            | 0.0009242 |
| rs954360    | 7 | 152737659 T | 4  | 18 C            | 0.0009242 |
| rs3898061   | 7 | 152737701 A | 4  | 18 G            | 0.0009242 |
| rs954359    | 7 | 152737733 C | 4  | 18 T            | 0.0009242 |
| rs11388703  | 7 | 152738308 T | 4  | 18 TG           | 0.0009242 |
| rs3111875   | 7 | 154975699 A | 13 | 30 G            | 0.0007578 |
| rs13223976  | 7 | 154976046 C | 29 | 48 T            | 0.0005332 |
| rs6597471   | 7 | 154978788 G | 30 | 48 C            | 0.0009571 |
| rs6597473   | 7 | 154978979 A | 30 | 48 G            | 0.0009571 |
| 7:154979133 | 7 | 154979133 C | 30 | 48 CTT          | 0.0009571 |
| 7:154979135 | 7 | 154979135 C | 30 | 48 CTGCCTCATTGG | 0.0009571 |
| rs4960695   | 7 | 154979628 A | 30 | 48 C            | 0.0009571 |
| rs4960696   | 7 | 154979643 C | 30 | 48 T            | 0.0009571 |
| rs7794634   | 7 | 154980152 T | 29 | 48 C            | 0.0005332 |
| rs7804702   | 7 | 154980153 G | 30 | 48 A            | 0.0009571 |
| rs7790169   | 7 | 154980168 A | 30 | 48 G            | 0.0009571 |
| rs7790310   | 7 | 154980243 A | 30 | 48 G            | 0.0009571 |
| rs10279840  | 7 | 154980616 A | 29 | 48 C            | 0.0005332 |
| rs10274085  | 7 | 154980631 C | 30 | 48 T            | 0.0009571 |
| rs35191725  | 7 | 154980990 T | 30 | 48 C            | 0.0009571 |
| rs11975494  | 7 | 154981034 G | 30 | 48 C            | 0.0009571 |
| rs4273809   | 7 | 154981157 A | 30 | 48 G            | 0.0009571 |
| rs1465783   | 7 | 154981313 A | 30 | 48 T            | 0.0009571 |
| rs1465784   | 7 | 154981331 G | 30 | 48 A            | 0.0009571 |
| rs11243341  | 7 | 154981454 T | 30 | 48 C            | 0.0009571 |
| rs6597474   | 7 | 154981756 T | 30 | 48 G            | 0.0009571 |
| rs6597475   | 7 | 154981760 G | 30 | 48 A            | 0.0009571 |
| rs4620236   | 7 | 154986897 T | 8  | 25 C            | 0.0003633 |
| rs11762624  | 7 | 154990360 T | 8  | 25 C            | 0.0003633 |
| rs34684769  | 7 | 154991646 A | 8  | 25 G            | 0.0003633 |
| rs2873382   | 7 | 154994122 G | 8  | 25 C            | 0.0003633 |
| rs11773201  | 7 | 154994653 A | 8  | 25 G            | 0.0003633 |
| rs11773280  | 7 | 154994990 A | 8  | 25 G            | 0.0003633 |
| rs12719690  | 7 | 155009761 A | 27 | 45 G            | 0.0009136 |
| rs6943455   | 7 | 155011946 C | 31 | 51 T            | 0.0002959 |
| rs1124175   | 7 | 155015124 T | 7  | 23 G            | 0.0004919 |



|             |   |                    |    |                   |           |
|-------------|---|--------------------|----|-------------------|-----------|
| rs4134496   | 7 | 155019285 A        | 3  | 16 G              | 0.0009912 |
| rs12666834  | 7 | 155019546 A        | 8  | 26 C              | 0.0001919 |
| rs7007130   | 8 | 1762754 C          | 30 | 48 G              | 0.0009571 |
| rs4308779   | 8 | 1763227 G          | 30 | 48 A              | 0.0009571 |
| 8:1764026   | 8 | 1764026 GAAAGAAAGA | 0  | 10 G              | 0.0003694 |
| rs113348912 | 8 | 2573525 TTCTTG     | 13 | 30 T              | 0.0007578 |
| rs6993235   | 8 | 2587648 G          | 41 | 16 A              | 0.0002964 |
| rs17755518  | 8 | 2596106 T          | 37 | 14 G              | 0.0006739 |
| rs7831554   | 8 | 2597843 G          | 38 | 15 A              | 0.0007851 |
| rs4876049   | 8 | 2693627 C          | 15 | 33 T              | 0.0005689 |
| rs17078672  | 8 | 2697280 G          | 13 | 32 A              | 0.0002287 |
| rs75062583  | 8 | 2708370 C          | 1  | 12 T              | 0.0007887 |
| 8:3040116   | 8 | 3040116 A          | 0  | 10 G              | 0.0003159 |
| 8:3040118   | 8 | 3040118 GTGTA      | 0  | 10 G              | 0.0003694 |
| 8:3040126   | 8 | 3040126 A          | 0  | 10 G              | 0.0003694 |
| rs1154063   | 8 | 4301904 A          | 2  | 15 G              | 0.000564  |
| rs77354697  | 8 | 4311101 A          | 5  | 19 T              | 0.0008415 |
| rs113568212 | 8 | 4358101 G          | 2  | 14 A              | 0.0009649 |
| rs11985944  | 8 | 6021491 T          | 26 | 5 G               | 0.0001012 |
| rs2570665   | 8 | 6031822 G          | 28 | 8 A               | 0.0006092 |
| rs113660596 | 8 | 6323448 G          | 6  | 24 C              | 0.0008935 |
| 8:6323452   | 8 | 6323452 C          | 6  | 24 CCATCCATCCATC( | 0.0008935 |
| 8:6323456   | 8 | 6323456 C          | 6  | 23 CCATCCATCCATG  | 0.0001763 |
| 8:6323462   | 8 | 6323462 C          | 6  | 23 A              | 0.0001763 |
| rs12550299  | 8 | 6325442 C          | 3  | 16 G              | 0.0009912 |
| rs12545613  | 8 | 6325499 T          | 3  | 16 C              | 0.0009912 |
| rs2442497   | 8 | 6326748 C          | 3  | 16 T              | 0.0009912 |
| rs7833481   | 8 | 6327065 G          | 3  | 16 A              | 0.0009912 |
| rs113529100 | 8 | 6327892 C          | 3  | 16 T              | 0.0009912 |
| rs2440397   | 8 | 6328393 C          | 3  | 16 G              | 0.0009912 |
| rs6989935   | 8 | 6328408 T          | 3  | 16 C              | 0.0009912 |
| rs57804372  | 8 | 6328848 C          | 3  | 16 T              | 0.0009912 |
| rs56073811  | 8 | 6328853 C          | 3  | 16 A              | 0.0009912 |
| rs2440396   | 8 | 6329014 C          | 3  | 16 T              | 0.0009912 |
| rs2442493   | 8 | 6329304 C          | 3  | 16 T              | 0.0009912 |
| rs2442491   | 8 | 6329579 G          | 3  | 16 A              | 0.0009912 |
| rs11137029  | 8 | 6330335 A          | 3  | 16 G              | 0.0009912 |
| rs12676907  | 8 | 6330447 A          | 3  | 16 G              | 0.0009912 |
| rs12681195  | 8 | 6330510 A          | 3  | 16 C              | 0.0009912 |
| rs2440395   | 8 | 6330513 T          | 3  | 16 A              | 0.0009912 |
| rs12676922  | 8 | 6330580 A          | 3  | 16 G              | 0.0009912 |

|             |   |              |    |                 |            |
|-------------|---|--------------|----|-----------------|------------|
| rs12675930  | 8 | 6330773 C    | 3  | 16 T            | 0.0009912  |
| rs112705156 | 8 | 6331079 C    | 3  | 16 G            | 0.0009912  |
| rs17077056  | 8 | 6331178 C    | 3  | 16 T            | 0.0009912  |
| rs60915478  | 8 | 6331612 A    | 3  | 16 G            | 0.0009912  |
| rs73196802  | 8 | 6333446 C    | 3  | 16 G            | 0.0009912  |
| rs17077067  | 8 | 6334053 G    | 3  | 16 A            | 0.0009912  |
| rs59635757  | 8 | 6334174 G    | 3  | 16 A            | 0.0009912  |
| rs11137033  | 8 | 6334619 C    | 3  | 16 T            | 0.0009912  |
| rs13281793  | 8 | 6337792 T    | 3  | 17 C            | 0.0005045  |
| rs13282116  | 8 | 6337938 G    | 3  | 17 C            | 0.0005045  |
| rs13248420  | 8 | 6337999 G    | 3  | 17 A            | 0.0005045  |
| rs12674488  | 8 | 6338306 A    | 3  | 17 C            | 0.0005045  |
| rs12677501  | 8 | 6338664 G    | 3  | 20 T            | 0.0006125  |
| rs17613024  | 8 | 6338953 A    | 3  | 17 G            | 0.0005045  |
| rs17077109  | 8 | 6339343 C    | 3  | 20 T            | 0.0006125  |
| rs13267816  | 8 | 6340205 G    | 2  | 20 C            | 0.0001141  |
| rs12679619  | 8 | 6340475 A    | 2  | 17 G            | 0.000111   |
| rs12680048  | 8 | 6340660 A    | 2  | 17 G            | 0.000111   |
| rs34635086  | 8 | 6341293 G    | 3  | 17 A            | 0.0005045  |
| rs373003367 | 8 | 6341378 C    | 3  | 17 CAAAGA       | 0.0005045  |
| rs34009442  | 8 | 6341569 C    | 3  | 17 T            | 0.0005045  |
| rs60127657  | 8 | 6341897 GA   | 3  | 17 G            | 0.0005045  |
| rs35150903  | 8 | 6342671 T    | 2  | 17 C            | 0.000111   |
| rs34754537  | 8 | 6343123 TC   | 3  | 17 T            | 0.0005045  |
| rs13281967  | 8 | 6347007 C    | 3  | 17 G            | 0.0005045  |
| rs13282022  | 8 | 6347058 C    | 3  | 17 G            | 0.0005045  |
| rs13282577  | 8 | 6347219 A    | 3  | 17 G            | 0.0005045  |
| rs12681009  | 8 | 6350873 G    | 3  | 17 A            | 0.0005045  |
| rs2442606   | 8 | 6387923 A    | 6  | 21 G            | 0.0006518  |
| rs201428357 | 8 | 11871062 T   | 0  | 9 C             | 0.0009641  |
| rs17222409  | 8 | 13385822 T   | 37 | 14 G            | 0.0006739  |
| 8:13730686  | 8 | 13730686 T   | 30 | 7 TA            | 0.000559   |
| 8:13730689  | 8 | 13730689 G   | 35 | 8 A             | 0.00001201 |
| 8:13730692  | 8 | 13730692 TAA | 30 | 7 T             | 0.000559   |
| 8:13730707  | 8 | 13730707 T   | 30 | 5 A             | 0.00005352 |
| 8:13730713  | 8 | 13730713 A   | 26 | 5 ATATATATATATA | 0.00009054 |
| 8:13730715  | 8 | 13730715 A   | 26 | 4 ATATATATATATA | 0.00001482 |
| rs7823636   | 8 | 14004973 C   | 22 | 41 A            | 0.0004309  |
| rs9325689   | 8 | 14023396 G   | 22 | 41 C            | 0.0004309  |
| rs34959295  | 8 | 15361577 A   | 14 | 31 G            | 0.0008795  |
| rs72207091  | 8 | 18681288 A   | 9  | 26 ACT          | 0.0004896  |

|             |   |                 |    |                  |           |
|-------------|---|-----------------|----|------------------|-----------|
| rs4294199   | 8 | 19757645 T      | 8  | 24 C             | 0.0006758 |
| rs11779530  | 8 | 19758215 T      | 8  | 24 G             | 0.0006758 |
| rs9650414   | 8 | 25954874 C      | 14 | 1 T              | 0.0007094 |
| rs73231554  | 8 | 26659518 T      | 0  | 10 C             | 0.0004292 |
| rs73231562  | 8 | 26671066 T      | 0  | 9 C              | 0.0009641 |
| rs73231563  | 8 | 26671162 G      | 0  | 9 A              | 0.0009641 |
| rs55648206  | 8 | 26675004 A      | 0  | 9 T              | 0.0009641 |
| rs55858769  | 8 | 26675245 G      | 0  | 9 T              | 0.0009641 |
| rs73231575  | 8 | 26679581 G      | 0  | 9 T              | 0.0009641 |
| rs17334323  | 8 | 26688826 A      | 48 | 23 G             | 0.0008881 |
| rs113277653 | 8 | 27767946 T      | 0  | 9 C              | 0.0009641 |
| 8:28135959  | 8 | 28135959 A      | 12 | 0 G              | 0.0004093 |
| rs3031241   | 8 | 32280128 TAAACA | 18 | 3 T              | 0.0009486 |
| rs10503914  | 8 | 32280827 C      | 18 | 3 T              | 0.0009486 |
| rs73234126  | 8 | 32399663 A      | 18 | 3 G              | 0.0009486 |
| 8:32405112  | 8 | 32405112 C      | 1  | 12 CA            | 0.0007887 |
| 8:32405114  | 8 | 32405114 C      | 1  | 12 CACACACACACAC | 0.0007887 |
| rs12542432  | 8 | 40993135 T      | 24 | 5 C              | 0.0003659 |
| rs61709546  | 8 | 42712987 C      | 13 | 0 G              | 0.0001783 |
| rs72647289  | 8 | 42964349 T      | 13 | 0 C              | 0.0001783 |
| rs59037494  | 8 | 42997744 T      | 13 | 0 C              | 0.0001783 |
| 8:43835929  | 8 | 43835929 A      | 20 | 3 T              | 0.000269  |
| 8:46840754  | 8 | 46840754 C      | 0  | 9 G              | 0.0009641 |
| rs7464406   | 8 | 55407591 A      | 18 | 36 G             | 0.0008188 |
| rs1072737   | 8 | 55414324 G      | 21 | 40 T             | 0.0006238 |
| rs5891536   | 8 | 55417984 TA     | 21 | 40 T             | 0.0006238 |
| rs17400452  | 8 | 55421102 C      | 21 | 40 A             | 0.0006238 |
| rs34231092  | 8 | 55421139 T      | 21 | 40 A             | 0.0006238 |
| rs17400501  | 8 | 55421226 G      | 21 | 40 A             | 0.0006238 |
| rs17309332  | 8 | 55421388 A      | 21 | 40 T             | 0.0006238 |
| rs17400569  | 8 | 55421420 C      | 21 | 40 T             | 0.0006238 |
| rs17309381  | 8 | 55421510 A      | 21 | 40 C             | 0.0006238 |
| rs10641771  | 8 | 55422635 CAAA   | 21 | 40 C             | 0.0006238 |
| rs7819146   | 8 | 55423384 A      | 21 | 40 G             | 0.0006238 |
| rs6473939   | 8 | 55423932 C      | 21 | 40 A             | 0.0006238 |
| rs6473940   | 8 | 55424053 C      | 21 | 40 T             | 0.0006238 |
| rs11782075  | 8 | 55434007 C      | 21 | 40 T             | 0.0006238 |
| rs13251118  | 8 | 55442498 A      | 21 | 40 G             | 0.0006238 |
| rs13266258  | 8 | 55444202 G      | 21 | 40 A             | 0.0006238 |
| rs71554168  | 8 | 55445687 G      | 25 | 43 GA            | 0.0008649 |
| rs13281003  | 8 | 55450271 C      | 21 | 40 T             | 0.0006238 |

|             |   |              |    |          |            |
|-------------|---|--------------|----|----------|------------|
| rs57780081  | 8 | 55453219 T   | 21 | 40 C     | 0.0006238  |
| rs66772979  | 8 | 55453589 A   | 20 | 42 G     | 0.0009387  |
| rs4738971   | 8 | 55453592 T   | 25 | 45 G     | 0.0004551  |
| rs6997005   | 8 | 55454506 A   | 21 | 40 G     | 0.0006238  |
| rs62516550  | 8 | 55467028 T   | 18 | 38 C     | 0.0002562  |
| rs34155635  | 8 | 55467747 CTT | 17 | 38 C     | 0.0002126  |
| rs117033707 | 8 | 55603134 C   | 0  | 10 G     | 0.0004292  |
| rs75736542  | 8 | 55670027 T   | 0  | 9 C      | 0.0009641  |
| rs144337474 | 8 | 55716390 C   | 0  | 10 G     | 0.0004292  |
| rs72645681  | 8 | 56363436 T   | 11 | 0 C      | 0.0007855  |
| rs62517408  | 8 | 56397088 G   | 11 | 0 A      | 0.0007855  |
| rs2439727   | 8 | 57709572 G   | 14 | 31 C     | 0.0008795  |
| rs2439726   | 8 | 57709999 T   | 14 | 31 C     | 0.0008795  |
| rs2439725   | 8 | 57717891 T   | 14 | 31 G     | 0.0008795  |
| rs2911710   | 8 | 57718944 A   | 14 | 31 G     | 0.0008795  |
| rs201700604 | 8 | 57721064 C   | 14 | 31 A     | 0.0008795  |
| rs140326078 | 8 | 57722202 T   | 14 | 31 C     | 0.0008795  |
| rs145468278 | 8 | 57723186 T   | 14 | 31 G     | 0.0008795  |
| rs149384686 | 8 | 57724174 A   | 14 | 32 G     | 0.0004925  |
| rs7817180   | 8 | 66206231 T   | 21 | 4 C      | 0.0008104  |
| rs10957338  | 8 | 66212413 T   | 21 | 4 C      | 0.0008104  |
| 8:66217376  | 8 | 66217376 AC  | 30 | 8 A      | 0.0001859  |
| rs10107515  | 8 | 66218313 A   | 21 | 4 G      | 0.0008104  |
| rs11426900  | 8 | 66221027 GT  | 23 | 5 G      | 0.0006807  |
| rs12546368  | 8 | 66237960 A   | 23 | 5 G      | 0.0006807  |
| 8:66332579  | 8 | 66332579 A   | 12 | 0 G      | 0.0003752  |
| rs34207507  | 8 | 67552947 CG  | 29 | 51 C     | 0.00008171 |
| rs36069899  | 8 | 68438324 A   | 13 | 0 G      | 0.0001783  |
| rs10957390  | 8 | 68457397 G   | 29 | 8 A      | 0.0003391  |
| rs10957391  | 8 | 68458267 C   | 28 | 8 T      | 0.0006092  |
| rs4737239   | 8 | 68460852 A   | 29 | 8 G      | 0.0003391  |
| rs2380415   | 8 | 68462201 T   | 28 | 8 C      | 0.0006092  |
| rs2380416   | 8 | 68462304 A   | 28 | 8 G      | 0.0006092  |
| rs2380417   | 8 | 68462501 G   | 29 | 8 C      | 0.0003391  |
| rs11785565  | 8 | 68462679 T   | 29 | 8 C      | 0.0003391  |
| rs10808755  | 8 | 68516681 T   | 47 | 19 G     | 0.0001149  |
| rs11781284  | 8 | 68517124 T   | 47 | 19 C     | 0.0001149  |
| rs7002461   | 8 | 68517827 A   | 43 | 18 T     | 0.0003235  |
| rs143489719 | 8 | 68518322 A   | 36 | 13 AAAAC | 0.0005704  |
| rs7836691   | 8 | 68518472 C   | 44 | 18 T     | 0.0002208  |
| rs7818863   | 8 | 68518795 T   | 47 | 19 C     | 0.0001149  |

|             |   |             |    |              |            |
|-------------|---|-------------|----|--------------|------------|
| rs2128105   | 8 | 68519685 C  | 39 | 14 T         | 0.0002137  |
| rs12680940  | 8 | 68522138 G  | 35 | 13 T         | 0.000996   |
| rs610372    | 8 | 68523186 A  | 36 | 13 G         | 0.0005704  |
| rs11782071  | 8 | 68523405 A  | 23 | 41 C         | 0.0008021  |
| rs408802    | 8 | 68523594 T  | 47 | 19 C         | 0.0001149  |
| rs7814309   | 8 | 68525283 T  | 36 | 13 C         | 0.0005704  |
| rs7832751   | 8 | 68525425 C  | 38 | 14 T         | 0.0003829  |
| rs2086540   | 8 | 68525931 A  | 36 | 13 C         | 0.0005704  |
| rs379025    | 8 | 68526546 T  | 47 | 19 G         | 0.0001149  |
| rs421352    | 8 | 68526582 G  | 35 | 13 A         | 0.000996   |
| rs7004943   | 8 | 68998892 A  | 29 | 9 G          | 0.0008145  |
| rs12677746  | 8 | 70908932 T  | 25 | 6 G          | 0.0005533  |
| rs59764656  | 8 | 70915304 G  | 25 | 6 C          | 0.0005533  |
| rs61043439  | 8 | 70915364 A  | 25 | 6 AT         | 0.0005533  |
| rs62533361  | 8 | 70917328 A  | 25 | 6 G          | 0.0005533  |
| rs62533365  | 8 | 70926751 C  | 25 | 6 G          | 0.0005533  |
| rs7017473   | 8 | 72000474 A  | 49 | 24 T         | 0.000936   |
| rs66664867  | 8 | 75356443 A  | 11 | 0 ACGCGCG    | 0.0007855  |
| rs72672726  | 8 | 78915051 T  | 19 | 36 C         | 0.0008669  |
| rs147963364 | 8 | 78939322 AT | 19 | 37 A         | 0.0009069  |
| rs79112138  | 8 | 79833517 A  | 2  | 17 G         | 0.000111   |
| rs34445833  | 8 | 80770915 C  | 49 | 23 G         | 0.0005083  |
| rs13279712  | 8 | 80771340 A  | 40 | 16 G         | 0.0005221  |
| rs10098536  | 8 | 80771378 C  | 25 | 48 T         | 0.00003878 |
| rs11986142  | 8 | 80772791 C  | 45 | 20 T         | 0.0007326  |
| rs79107621  | 8 | 80772962 C  | 29 | 51 A         | 0.00008171 |
| rs77652490  | 8 | 80774159 C  | 46 | 20 T         | 0.0004155  |
| rs1966859   | 8 | 80776483 A  | 28 | 46 G         | 0.0009321  |
| rs10958009  | 8 | 82239312 C  | 18 | 3 G          | 0.0009486  |
| rs116877427 | 8 | 91064745 A  | 0  | 9 G          | 0.0009641  |
| 8:98448334  | 8 | 98448334 A  | 2  | 14 ATTTTAT   | 0.0009649  |
| rs7828927   | 8 | 99123614 C  | 18 | 3 T          | 0.0009486  |
| rs141450399 | 8 | 101232421 T | 5  | 20 TCAGTACTG | 0.0004383  |
| rs17336058  | 8 | 101242613 T | 5  | 20 C         | 0.0004383  |
| rs17421246  | 8 | 101262063 G | 5  | 20 A         | 0.0004383  |
| rs145170162 | 8 | 101269045 C | 5  | 20 CA        | 0.0004383  |
| rs17422137  | 8 | 101297726 G | 5  | 20 A         | 0.0004383  |
| rs62514974  | 8 | 101306401 A | 5  | 20 T         | 0.0004383  |
| rs17337916  | 8 | 101317666 A | 5  | 20 G         | 0.0004383  |
| rs56356271  | 8 | 101322458 T | 5  | 20 C         | 0.0004383  |
| rs59885259  | 8 | 101345308 G | 5  | 19 GA        | 0.0008415  |

|             |   |                       |    |          |            |
|-------------|---|-----------------------|----|----------|------------|
| 8:102664587 | 8 | 102664587 GA          | 1  | 12 G     | 0.0009476  |
| 8:103535019 | 8 | 103535019 C           | 41 | 15 T     | 0.0001402  |
| rs405634    | 8 | 108648739 A           | 34 | 11 G     | 0.0003893  |
| rs138007099 | 8 | 115585034 CTTTACTTCCT | 14 | 1 C      | 0.0007094  |
| rs138795202 | 8 | 115585723 A           | 14 | 1 ACAC   | 0.0007094  |
| rs56358453  | 8 | 115585748 G           | 14 | 1 C      | 0.0007094  |
| rs12682243  | 8 | 115589058 A           | 14 | 1 G      | 0.0007094  |
| rs4278177   | 8 | 115589089 A           | 14 | 1 C      | 0.0007094  |
| rs1390802   | 8 | 115589367 C           | 14 | 1 T      | 0.0007094  |
| rs11987607  | 8 | 115589433 C           | 14 | 1 T      | 0.0007094  |
| rs112972565 | 8 | 115592838 T           | 14 | 1 C      | 0.0007094  |
| rs188331229 | 8 | 115593078 G           | 14 | 1 T      | 0.0007094  |
| 8:115595287 | 8 | 115595287 G           | 14 | 1 C      | 0.0007094  |
| rs144558766 | 8 | 115595780 T           | 14 | 1 C      | 0.0007094  |
| rs368858621 | 8 | 115595883 T           | 14 | 0 C      | 0.00008428 |
| 8:115596736 | 8 | 115596736 A           | 14 | 1 G      | 0.0007094  |
| rs4360323   | 8 | 115597453 G           | 14 | 1 T      | 0.0007094  |
| rs189798615 | 8 | 115597550 A           | 14 | 1 G      | 0.0007094  |
| rs4375035   | 8 | 115597614 T           | 14 | 1 G      | 0.0007094  |
| rs113058397 | 8 | 115598479 T           | 14 | 1 C      | 0.0007094  |
| rs113913892 | 8 | 115598520 A           | 14 | 1 T      | 0.0007094  |
| rs72688152  | 8 | 115598609 C           | 14 | 1 T      | 0.0007094  |
| rs140621    | 8 | 115601414 T           | 14 | 1 A      | 0.0007094  |
| rs140623    | 8 | 115601454 T           | 14 | 1 C      | 0.0007094  |
| rs140624    | 8 | 115601470 C           | 14 | 1 G      | 0.0007094  |
| rs72688155  | 8 | 115603416 A           | 14 | 1 G      | 0.0007094  |
| rs72688157  | 8 | 115605160 C           | 14 | 1 A      | 0.0007094  |
| rs72688158  | 8 | 115606114 C           | 14 | 1 G      | 0.0007094  |
| rs72688160  | 8 | 115606270 G           | 14 | 1 A      | 0.0007094  |
| rs72688161  | 8 | 115607364 T           | 14 | 1 C      | 0.0007094  |
| rs72688163  | 8 | 115607738 T           | 14 | 1 A      | 0.0007094  |
| rs72688165  | 8 | 115609100 C           | 14 | 1 T      | 0.0007094  |
| rs61119861  | 8 | 115609854 T           | 14 | 1 C      | 0.0007094  |
| rs61642028  | 8 | 115609982 C           | 14 | 1 T      | 0.0007094  |
| rs111607481 | 8 | 115610153 G           | 14 | 1 GATTTT | 0.0007094  |
| rs11436316  | 8 | 115611394 AC          | 14 | 1 A      | 0.0007094  |
| rs149860162 | 8 | 115611534 A           | 14 | 1 AAATT  | 0.0007094  |
| rs11436317  | 8 | 115611558 CA          | 14 | 1 C      | 0.0007094  |
| rs1010296   | 8 | 115612916 G           | 14 | 1 A      | 0.0007094  |
| rs59874151  | 8 | 115613474 G           | 14 | 1 A      | 0.0007094  |
| rs141271051 | 8 | 115614789 G           | 14 | 1 GA     | 0.0007094  |

|             |   |              |    |           |           |
|-------------|---|--------------|----|-----------|-----------|
| rs1390805   | 8 | 115615140 C  | 14 | 1 A       | 0.0007094 |
| rs10505224  | 8 | 115615472 G  | 14 | 1 C       | 0.0006479 |
| rs72688171  | 8 | 115617154 A  | 14 | 1 G       | 0.0007094 |
| rs6993330   | 8 | 115618369 G  | 14 | 1 A       | 0.0007094 |
| rs990064    | 8 | 115620846 A  | 14 | 1 G       | 0.0007094 |
| rs72688174  | 8 | 115621273 T  | 14 | 1 G       | 0.0007094 |
| rs67259516  | 8 | 115622714 A  | 14 | 1 G       | 0.0007094 |
| rs11987094  | 8 | 115623858 G  | 14 | 1 T       | 0.0007094 |
| rs113317677 | 8 | 115624633 GA | 14 | 1 G       | 0.0007094 |
| rs56744618  | 8 | 115625115 G  | 14 | 1 A       | 0.0007094 |
| rs10568390  | 8 | 115625262 A  | 14 | 1 ATG     | 0.0007094 |
| rs716319    | 8 | 115626526 G  | 14 | 1 A       | 0.0007094 |
| rs72688177  | 8 | 115628267 A  | 14 | 1 G       | 0.0007094 |
| rs11989617  | 8 | 115630616 A  | 14 | 1 G       | 0.0007094 |
| rs12675391  | 8 | 115632043 T  | 14 | 1 C       | 0.0007094 |
| rs1390806   | 8 | 115635282 A  | 14 | 1 G       | 0.0006479 |
| rs148024664 | 8 | 115637496 G  | 15 | 1 GC      | 0.0003205 |
| rs72688180  | 8 | 115638469 C  | 15 | 1 G       | 0.0003205 |
| rs72688182  | 8 | 115641954 T  | 14 | 1 C       | 0.0006479 |
| rs201102203 | 8 | 115644084 A  | 14 | 1 C       | 0.0006479 |
| rs140178196 | 8 | 115644994 T  | 14 | 1 C       | 0.0006479 |
| 8:115645784 | 8 | 115645784 T  | 16 | 1 G       | 0.0001286 |
| rs150137951 | 8 | 115648635 T  | 14 | 1 C       | 0.0007094 |
| rs142867399 | 8 | 115648840 T  | 14 | 1 G       | 0.0007094 |
| rs75777265  | 8 | 115649722 C  | 14 | 1 T       | 0.0007094 |
| rs72688185  | 8 | 115650891 G  | 14 | 1 A       | 0.0007094 |
| rs182353197 | 8 | 115652354 A  | 14 | 1 T       | 0.0007094 |
| rs75910793  | 8 | 115652678 G  | 14 | 1 A       | 0.0007094 |
| rs11996788  | 8 | 115653663 G  | 14 | 1 C       | 0.0007094 |
| rs931614    | 8 | 115653998 A  | 14 | 1 G       | 0.0007094 |
| rs1496752   | 8 | 115654884 T  | 14 | 1 C       | 0.0007094 |
| rs72688196  | 8 | 115663941 G  | 14 | 1 C       | 0.0007094 |
| rs200567012 | 8 | 115666287 T  | 14 | 1 G       | 0.0007094 |
| 8:115667919 | 8 | 115667919 A  | 14 | 1 ATTTTTT | 0.0008899 |
| rs72688199  | 8 | 115670389 T  | 14 | 1 G       | 0.0007094 |
| rs56335213  | 8 | 115675219 A  | 14 | 1 C       | 0.0007094 |
| rs7845200   | 8 | 115698181 G  | 17 | 2 A       | 0.000467  |
| rs28445023  | 8 | 115701338 T  | 18 | 2 C       | 0.0002408 |
| rs28505858  | 8 | 115707801 T  | 18 | 2 C       | 0.0002408 |
| rs7827613   | 8 | 115712241 G  | 18 | 2 A       | 0.0002408 |
| rs201598000 | 8 | 115713723 C  | 17 | 2 G       | 0.000959  |

|             |   |                |    |         |            |
|-------------|---|----------------|----|---------|------------|
| 8:115713727 | 8 | 115713727 C    | 14 | 1 G     | 0.0007094  |
| 8:115714930 | 8 | 115714930 T    | 14 | 1 TA    | 0.0007094  |
| rs10109368  | 8 | 115715757 C    | 18 | 2 T     | 0.0002408  |
| rs71886645  | 8 | 115717208 T    | 18 | 2 TAATA | 0.0002408  |
| rs10100267  | 8 | 115721881 T    | 18 | 2 C     | 0.0002408  |
| rs3062473   | 8 | 115731072 TTAG | 18 | 2 T     | 0.0002408  |
| rs35150135  | 8 | 115731550 T    | 18 | 3 C     | 0.0009486  |
| rs7826937   | 8 | 129264171 C    | 17 | 37 T    | 0.0002264  |
| rs4733850   | 8 | 129264260 A    | 17 | 37 G    | 0.0002264  |
| rs4733851   | 8 | 129264420 A    | 23 | 42 G    | 0.0004519  |
| rs2142199   | 8 | 129266826 T    | 26 | 44 C    | 0.0008911  |
| rs4733601   | 8 | 129269466 A    | 26 | 44 G    | 0.0008911  |
| rs1120501   | 8 | 129274183 A    | 26 | 45 T    | 0.0005028  |
| rs2702973   | 8 | 134090891 A    | 27 | 45 G    | 0.0009136  |
| rs2739166   | 8 | 134091284 T    | 27 | 45 C    | 0.0009136  |
| rs2702974   | 8 | 134092210 C    | 27 | 45 T    | 0.0009136  |
| rs2702979   | 8 | 134093965 C    | 27 | 45 T    | 0.0009136  |
| rs2739171   | 8 | 134098665 A    | 27 | 45 G    | 0.0009136  |
| rs13256826  | 8 | 134116227 T    | 23 | 43 C    | 0.0002487  |
| rs4736434   | 8 | 134121121 T    | 23 | 43 C    | 0.0002487  |
| rs73365346  | 8 | 135605357 A    | 3  | 17 G    | 0.0005045  |
| rs2668112   | 8 | 138939408 C    | 31 | 49 T    | 0.0009634  |
| rs6578129   | 8 | 141656890 G    | 21 | 40 A    | 0.0006238  |
| rs938724    | 8 | 141657133 G    | 21 | 40 A    | 0.0006238  |
| rs6997840   | 8 | 141658361 T    | 20 | 40 C    | 0.0003188  |
| rs4507813   | 8 | 141796344 T    | 26 | 44 C    | 0.0008911  |
| rs59704417  | 8 | 142574115 T    | 5  | 19 C    | 0.0008415  |
| rs7042540   | 9 | 343859 C       | 17 | 37 T    | 0.0002264  |
| rs7032705   | 9 | 343861 G       | 14 | 31 C    | 0.0008795  |
| rs750586    | 9 | 362749 G       | 7  | 23 A    | 0.0004919  |
| rs10814269  | 9 | 366911 A       | 9  | 26 G    | 0.0004896  |
| rs74343447  | 9 | 730460 A       | 15 | 36 G    | 0.00009076 |
| rs10758864  | 9 | 743353 T       | 19 | 38 C    | 0.0005156  |
| rs7033398   | 9 | 2303184 A      | 48 | 23 C    | 0.0008881  |
| 9:4806593   | 9 | 4806593 T      | 1  | 12 C    | 0.0007887  |
| rs7027864   | 9 | 6654713 G      | 3  | 16 T    | 0.0009912  |
| rs71330108  | 9 | 6661368 GA     | 2  | 15 G    | 0.0004755  |
| 9:7646055   | 9 | 7646055 G      | 16 | 2 A     | 0.0008956  |
| rs12555779  | 9 | 8798076 T      | 39 | 16 A    | 0.0009032  |
| rs10283912  | 9 | 12285170 C     | 53 | 26 T    | 0.0003309  |
| rs1389739   | 9 | 14809650 C     | 2  | 14 T    | 0.0009649  |



|             |   |                  |    |       |             |
|-------------|---|------------------|----|-------|-------------|
| rs1389738   | 9 | 14809826 C       | 2  | 14 T  | 0.0009649   |
| rs35954375  | 9 | 14827173 CAGA    | 2  | 15 C  | 0.0004755   |
| rs2483055   | 9 | 14834542 A       | 2  | 14 G  | 0.0009649   |
| rs34699275  | 9 | 14834902 G       | 2  | 14 GT | 0.0009649   |
| rs1855138   | 9 | 14835141 C       | 2  | 14 G  | 0.0009649   |
| rs10810790  | 9 | 17458872 C       | 9  | 25 T  | 0.0008942   |
| rs10811484  | 9 | 21158515 G       | 43 | 19 C  | 0.000761    |
| rs4568676   | 9 | 21184475 G       | 42 | 18 C  | 0.0006782   |
| 9:27989449  | 9 | 27989449 C       | 25 | 5 G   | 0.0001938   |
| 9:27989455  | 9 | 27989455 C       | 22 | 3 G   | 0.0001254   |
| 9:30709794  | 9 | 30709794 A       | 16 | 2 AC  | 0.0008037   |
| rs17313768  | 9 | 32844139 G       | 27 | 45 A  | 0.0009136   |
| rs1831038   | 9 | 32849413 T       | 55 | 28 C  | 0.0005409   |
| rs199710298 | 9 | 33345167 GAAAAGA | 40 | 17 G  | 0.0009663   |
| rs200778528 | 9 | 39068726 G       | 33 | 11 A  | 0.0003674   |
| rs201996957 | 9 | 39071703 C       | 38 | 14 T  | 0.0003829   |
| rs201890411 | 9 | 39074383 C       | 39 | 12 T  | 0.00004106  |
| rs185321727 | 9 | 39074414 C       | 37 | 14 A  | 0.0006739   |
| rs62568849  | 9 | 39074909 T       | 39 | 14 G  | 0.0002137   |
| rs1758483   | 9 | 39077411 G       | 38 | 14 A  | 0.0003829   |
| rs7046178   | 9 | 39078975 G       | 38 | 13 C  | 0.0001774   |
| rs201581639 | 9 | 39079350 T       | 39 | 14 G  | 0.0002137   |
| rs62569964  | 9 | 39085463 G       | 34 | 7 A   | 0.000004686 |
| rs6476770   | 9 | 39087785 A       | 39 | 14 C  | 0.0002137   |
| rs1758516   | 9 | 39096642 T       | 38 | 14 C  | 0.0003829   |
| rs1855006   | 9 | 39097179 C       | 40 | 14 A  | 0.0001172   |
| rs4961901   | 9 | 39098698 A       | 39 | 14 G  | 0.0002137   |
| rs6476771   | 9 | 39100338 T       | 39 | 14 C  | 0.0002137   |
| rs10814795  | 9 | 39105379 G       | 47 | 22 A  | 0.0008379   |
| 9:40030023  | 9 | 40030023 C       | 12 | 0 A   | 0.0004093   |
| rs28572375  | 9 | 43702852 A       | 5  | 21 C  | 0.0002135   |
| rs117392740 | 9 | 45375209 A       | 2  | 18 G  | 0.00005262  |
| 9:66460369  | 9 | 66460369 G       | 0  | 9 T   | 0.0009641   |
| rs140864612 | 9 | 68387193 T       | 11 | 0 C   | 0.0007855   |
| 9:69045346  | 9 | 69045346 T       | 2  | 17 C  | 0.000111    |
| rs200037816 | 9 | 69045348 G       | 6  | 21 A  | 0.0006518   |
| rs200760575 | 9 | 69152028 A       | 5  | 21 G  | 0.0002243   |
| rs200315439 | 9 | 69271352 T       | 2  | 15 C  | 0.0004755   |
| rs4571790   | 9 | 75833403 A       | 12 | 0 C   | 0.0003752   |
| rs35750820  | 9 | 75835437 CTT     | 15 | 1 C   | 0.0003561   |
| rs4581122   | 9 | 75836057 A       | 15 | 1 C   | 0.0003561   |

|            |   |            |    |         |            |
|------------|---|------------|----|---------|------------|
| rs9657735  | 9 | 75838758 T | 15 | 1 C     | 0.0003561  |
| rs9657736  | 9 | 75840034 G | 15 | 1 A     | 0.0003561  |
| rs28796899 | 9 | 75841710 T | 17 | 2 A     | 0.0004125  |
| rs28833833 | 9 | 75841713 A | 15 | 1 T     | 0.0003205  |
| rs4366143  | 9 | 75843433 T | 15 | 1 C     | 0.0003561  |
| rs6560325  | 9 | 75844545 T | 15 | 1 C     | 0.0003561  |
| rs7863612  | 9 | 75845098 T | 15 | 1 G     | 0.0003561  |
| rs4495499  | 9 | 75845497 T | 15 | 1 C     | 0.0003561  |
| rs4745226  | 9 | 75846009 A | 15 | 1 T     | 0.0003561  |
| rs4510925  | 9 | 75846595 G | 15 | 1 T     | 0.0003561  |
| rs5898293  | 9 | 75847204 G | 15 | 1 GA    | 0.0003561  |
| rs4400456  | 9 | 75857034 T | 17 | 2 C     | 0.000467   |
| rs67538661 | 9 | 75858583 T | 17 | 2 TA    | 0.000467   |
| rs4276752  | 9 | 75860197 C | 17 | 2 T     | 0.000467   |
| rs4282636  | 9 | 75906317 A | 17 | 0 C     | 0.00008611 |
| rs4474087  | 9 | 75906822 A | 17 | 0 G     | 0.00008611 |
| rs10869248 | 9 | 75907820 A | 15 | 0 C     | 0.00003963 |
| rs11143561 | 9 | 75926372 T | 17 | 0 C     | 0.00008611 |
| rs1414159  | 9 | 75932545 C | 17 | 0 A     | 0.00008611 |
| rs35789695 | 9 | 75943778 C | 17 | 0 CTCTT | 0.00008611 |
| rs1335387  | 9 | 75974289 G | 17 | 0 A     | 0.00008611 |
| rs6560339  | 9 | 76001473 A | 17 | 0 G     | 0.00008611 |
| rs2013971  | 9 | 76010849 C | 17 | 0 A     | 0.00008611 |
| rs1414161  | 9 | 76025984 G | 17 | 0 A     | 0.00008611 |
| rs1034264  | 9 | 76027946 T | 17 | 0 C     | 0.00008611 |
| rs280564   | 9 | 76052211 G | 17 | 0 T     | 0.00008611 |
| rs280573   | 9 | 76074106 C | 21 | 3 T     | 0.0002475  |
| rs2484348  | 9 | 76078030 T | 14 | 0 G     | 0.00008428 |
| rs375914   | 9 | 76085223 G | 14 | 0 T     | 0.00008428 |
| rs415546   | 9 | 76085262 C | 18 | 3 T     | 0.0009486  |
| rs278747   | 9 | 76089602 A | 18 | 3 G     | 0.0009486  |
| rs278742   | 9 | 76094975 A | 14 | 0 T     | 0.00008428 |
| rs278741   | 9 | 76095696 T | 18 | 3 G     | 0.0009486  |
| rs278738   | 9 | 76098252 A | 14 | 0 C     | 0.00008428 |
| rs278733   | 9 | 76110042 T | 14 | 0 C     | 0.00008428 |
| rs383182   | 9 | 76115818 C | 14 | 0 T     | 0.00008428 |
| rs278763   | 9 | 76127267 A | 14 | 0 G     | 0.00008428 |
| rs166767   | 9 | 76137194 C | 14 | 0 T     | 0.00008428 |
| rs278753   | 9 | 76141288 G | 14 | 0 A     | 0.00008428 |
| rs2492826  | 9 | 76150936 A | 14 | 0 T     | 0.00008428 |
| rs278711   | 9 | 76154116 A | 14 | 0 G     | 0.00008428 |

|             |   |             |    |        |            |
|-------------|---|-------------|----|--------|------------|
| rs278731    | 9 | 76162393 T  | 14 | 0 C    | 0.00008428 |
| rs382417    | 9 | 76164453 G  | 14 | 0 A    | 0.00008428 |
| rs451914    | 9 | 76164728 G  | 14 | 0 A    | 0.00008428 |
| rs275530    | 9 | 76174599 G  | 14 | 0 A    | 0.00008428 |
| rs157119    | 9 | 76182983 G  | 14 | 0 C    | 0.00008428 |
| rs4745472   | 9 | 78547238 A  | 0  | 9 G    | 0.0009641  |
| rs79217522  | 9 | 78549195 T  | 0  | 9 C    | 0.0009641  |
| rs77748422  | 9 | 78550364 A  | 0  | 9 G    | 0.0009641  |
| rs75091696  | 9 | 78550427 A  | 0  | 9 G    | 0.0009641  |
| rs111599823 | 9 | 78552206 C  | 0  | 9 T    | 0.0009641  |
| rs55889015  | 9 | 78552938 C  | 0  | 9 T    | 0.0009641  |
| rs80035155  | 9 | 78556053 A  | 0  | 9 G    | 0.0009641  |
| rs56041801  | 9 | 78556371 G  | 0  | 9 A    | 0.0009641  |
| rs55819351  | 9 | 78557643 C  | 0  | 9 T    | 0.0009641  |
| rs112424082 | 9 | 78558168 T  | 0  | 9 C    | 0.0009641  |
| rs75747130  | 9 | 78559673 T  | 0  | 9 A    | 0.0009641  |
| rs12553234  | 9 | 78560721 A  | 0  | 9 G    | 0.0009641  |
| rs112901856 | 9 | 78562429 A  | 0  | 9 C    | 0.0009641  |
| rs79019815  | 9 | 78562632 G  | 0  | 9 A    | 0.0009641  |
| rs4745476   | 9 | 78565973 T  | 0  | 9 C    | 0.0009641  |
| rs4745477   | 9 | 78566447 C  | 0  | 9 T    | 0.0009641  |
| rs373589527 | 9 | 78566687 A  | 0  | 9 AAAC | 0.0009641  |
| rs7875186   | 9 | 81253945 C  | 18 | 36 T   | 0.0008188  |
| rs2106804   | 9 | 81254538 C  | 18 | 36 T   | 0.0008188  |
| rs9657722   | 9 | 81267990 A  | 18 | 37 T   | 0.0004627  |
| rs7864005   | 9 | 81268849 G  | 18 | 36 T   | 0.0008188  |
| rs2225192   | 9 | 81932941 C  | 35 | 12 T   | 0.0004754  |
| rs12685026  | 9 | 81939372 T  | 34 | 12 G   | 0.000839   |
| rs971986    | 9 | 81952643 C  | 33 | 11 T   | 0.0003674  |
| rs1329559   | 9 | 82811242 G  | 16 | 34 T   | 0.0006492  |
| rs36054026  | 9 | 85810319 A  | 30 | 6 C    | 0.00002254 |
| rs10739960  | 9 | 96622388 G  | 23 | 41 T   | 0.0008021  |
| rs4428725   | 9 | 96623453 G  | 23 | 41 T   | 0.0008021  |
| rs4744295   | 9 | 96623821 G  | 23 | 41 A   | 0.0008021  |
| rs4075732   | 9 | 96624526 C  | 23 | 41 A   | 0.0008021  |
| rs10821241  | 9 | 96626249 A  | 23 | 41 G   | 0.0008021  |
| rs2066474   | 9 | 99064425 C  | 10 | 28 T   | 0.0003491  |
| rs1889266   | 9 | 101724686 C | 17 | 35 G   | 0.0007327  |
| rs2151616   | 9 | 101729103 A | 9  | 25 G   | 0.0008942  |
| rs882728    | 9 | 101730236 G | 8  | 24 A   | 0.0006758  |
| rs882221    | 9 | 101731087 A | 9  | 25 G   | 0.0008942  |

|             |   |                    |    |          |           |
|-------------|---|--------------------|----|----------|-----------|
| rs60355315  | 9 | 101731421 T        | 9  | 25 A     | 0.0008942 |
| rs2791337   | 9 | 102741443 C        | 50 | 25 T     | 0.000784  |
| rs72731390  | 9 | 102824872 C        | 1  | 12 T     | 0.0007887 |
| rs11333350  | 9 | 102911331 C        | 50 | 25 CA    | 0.0005324 |
| rs138812004 | 9 | 102984216 G        | 1  | 12 GA    | 0.0007887 |
| rs2812301   | 9 | 108208066 A        | 16 | 34 G     | 0.0006492 |
| rs59463718  | 9 | 108208647 C        | 16 | 34 CTTAT | 0.0006492 |
| rs62575093  | 9 | 108209438 G        | 15 | 34 C     | 0.0003148 |
| rs2771038   | 9 | 108219091 A        | 35 | 13 G     | 0.000996  |
| rs2771039   | 9 | 108221252 A        | 16 | 34 G     | 0.0006492 |
| rs2812306   | 9 | 108221369 A        | 16 | 34 T     | 0.0006492 |
| rs62575095  | 9 | 108224124 A        | 16 | 34 G     | 0.0006492 |
| rs12686557  | 9 | 108225290 A        | 46 | 20 G     | 0.0004155 |
| rs145768242 | 9 | 108228282 A        | 16 | 34 ACT   | 0.0006492 |
| rs2771044   | 9 | 108242839 G        | 16 | 34 C     | 0.0006492 |
| rs139942055 | 9 | 108253522 T        | 45 | 20 C     | 0.0007326 |
| rs7865377   | 9 | 108256602 A        | 16 | 34 G     | 0.0006492 |
| rs7865160   | 9 | 108256610 T        | 16 | 34 C     | 0.0006492 |
| rs2225246   | 9 | 108263907 A        | 36 | 14 G     | 0.0006638 |
| rs10820812  | 9 | 108274931 A        | 45 | 20 G     | 0.0007326 |
| rs7357782   | 9 | 108281208 A        | 47 | 21 G     | 0.0004473 |
| rs7357632   | 9 | 108282855 A        | 45 | 20 G     | 0.0007326 |
| rs62575103  | 9 | 108284699 A        | 16 | 34 G     | 0.0006492 |
| rs62575104  | 9 | 108290049 T        | 16 | 34 C     | 0.0006492 |
| rs74442717  | 9 | 108291374 T        | 16 | 34 G     | 0.0006492 |
| rs2768279   | 9 | 108293223 T        | 46 | 21 A     | 0.0007859 |
| rs59803965  | 9 | 108294017 T        | 45 | 20 TAG   | 0.0007326 |
| rs57432946  | 9 | 108305782 C        | 16 | 34 G     | 0.0006492 |
| rs149664708 | 9 | 108309573 TGTGTTTG | 16 | 34 T     | 0.0006492 |
| rs16403     | 9 | 108314485 A        | 47 | 21 AAC   | 0.0004473 |
| rs4742651   | 9 | 108315424 T        | 16 | 34 C     | 0.0006492 |
| rs62575112  | 9 | 108328228 A        | 16 | 34 G     | 0.0006492 |
| rs4742653   | 9 | 108328588 C        | 16 | 34 A     | 0.0006492 |
| rs76375684  | 9 | 108329464 A        | 16 | 34 C     | 0.0006492 |
| rs7024265   | 9 | 108331234 A        | 16 | 34 G     | 0.0006492 |
| rs4742953   | 9 | 108335958 C        | 16 | 34 G     | 0.0006492 |
| rs62575116  | 9 | 108339846 C        | 16 | 34 A     | 0.0006492 |
| rs147408591 | 9 | 108341274 G        | 16 | 34 A     | 0.0006492 |
| rs35238231  | 9 | 108344560 A        | 48 | 23 AC    | 0.0008881 |
| rs17309137  | 9 | 108348138 A        | 16 | 34 G     | 0.0006492 |
| rs17309319  | 9 | 108350328 A        | 16 | 34 T     | 0.0006492 |

|             |    |               |    |                 |             |
|-------------|----|---------------|----|-----------------|-------------|
| rs7037972   | 9  | 108351816 T   | 16 | 34 A            | 0.0006492   |
| rs59750891  | 9  | 108353179 A   | 16 | 34 AC           | 0.0006492   |
| rs2518124   | 9  | 108354230 C   | 46 | 20 T            | 0.0004155   |
| rs1960023   | 9  | 108355222 T   | 46 | 20 C            | 0.0004155   |
| rs4742955   | 9  | 108377097 A   | 17 | 35 G            | 0.0007327   |
| rs11399147  | 9  | 108394700 TA  | 20 | 38 T            | 0.0009963   |
| rs10978580  | 9  | 109410929 T   | 5  | 19 C            | 0.0008415   |
| rs10816411  | 9  | 109411613 T   | 5  | 19 C            | 0.0008415   |
| rs7859930   | 9  | 109412031 T   | 5  | 19 A            | 0.0008415   |
| rs10816412  | 9  | 109412764 T   | 5  | 19 G            | 0.0008415   |
| rs10816413  | 9  | 109413318 A   | 5  | 21 G            | 0.0002243   |
| rs74751740  | 9  | 112059930 A   | 11 | 0 G             | 0.0007855   |
| rs10981732  | 9  | 116087110 A   | 27 | 7 G             | 0.0004381   |
| 9:116087112 | 9  | 116087112 A   | 29 | 9 G             | 0.0008145   |
| rs3810928   | 9  | 116815777 T   | 53 | 25 C            | 0.000174    |
| rs141372136 | 9  | 116852266 A   | 52 | 26 AGTG         | 0.0005884   |
| rs145837769 | 9  | 117007494 GGT | 2  | 16 G            | 0.0002494   |
| rs2029522   | 9  | 117009953 A   | 6  | 21 G            | 0.0006518   |
| rs4979360   | 9  | 117010272 G   | 6  | 21 A            | 0.0006518   |
| rs10982123  | 9  | 117011093 G   | 3  | 17 A            | 0.0005045   |
| 9:120060987 | 9  | 120060987 GTA | 5  | 22 G            | 0.0001129   |
| rs80255914  | 9  | 122018796 G   | 0  | 9 C             | 0.0009641   |
| rs116127727 | 9  | 128190759 T   | 1  | 15 A            | 0.00007965  |
| rs12552483  | 9  | 128215861 A   | 1  | 13 G            | 0.0003716   |
| 9:134920806 | 9  | 134920806 A   | 5  | 19 C            | 0.0008415   |
| rs11103648  | 9  | 137941317 A   | 11 | 0 G             | 0.0007855   |
| rs11103650  | 9  | 137942656 A   | 11 | 0 G             | 0.0007855   |
| rs35973213  | 9  | 137960753 G   | 13 | 0 A             | 0.0001783   |
| rs75796057  | 9  | 137961094 A   | 14 | 0 G             | 0.00008428  |
| rs943202    | 10 | 832519 A      | 32 | 50 G            | 0.0009655   |
| 10:2362186  | 10 | 2362186 C     | 0  | 18 CACACA       | 0.000004865 |
| rs71497852  | 10 | 3042289 A     | 0  | 10 AG           | 0.0004292   |
| rs7082064   | 10 | 3226474 G     | 18 | 36 A            | 0.0008188   |
| rs138359959 | 10 | 3318900 C     | 13 | 0 CTCAAACCCAAAT | 0.0001973   |
| rs56296494  | 10 | 5918344 A     | 0  | 9 G             | 0.0009641   |
| rs2274026   | 10 | 5960227 G     | 0  | 9 A             | 0.0009641   |
| rs76713178  | 10 | 5962261 T     | 0  | 9 C             | 0.0009641   |
| rs17146333  | 10 | 5963692 T     | 0  | 9 C             | 0.0009641   |
| rs2274028   | 10 | 5965423 A     | 0  | 9 G             | 0.0009641   |
| rs7899635   | 10 | 5967177 A     | 0  | 9 G             | 0.0009641   |
| 10:5968058  | 10 | 5968058 ATTC  | 0  | 9 A             | 0.0009641   |

|             |    |              |    |         |           |
|-------------|----|--------------|----|---------|-----------|
| rs7904712   | 10 | 5971249 T    | 0  | 9 A     | 0.0009641 |
| rs2031230   | 10 | 5972582 C    | 0  | 9 T     | 0.0009641 |
| rs7913876   | 10 | 5972885 G    | 0  | 9 T     | 0.0009641 |
| rs7918162   | 10 | 5974304 G    | 0  | 9 A     | 0.0009641 |
| rs17146580  | 10 | 5977684 C    | 0  | 9 T     | 0.0009641 |
| rs17146587  | 10 | 5978169 G    | 0  | 9 A     | 0.0009641 |
| rs7893821   | 10 | 5978272 C    | 0  | 9 G     | 0.0009641 |
| rs2274031   | 10 | 5978629 A    | 0  | 9 G     | 0.0009641 |
| rs2274033   | 10 | 5979117 C    | 0  | 9 T     | 0.0009641 |
| rs76091163  | 10 | 5980087 G    | 0  | 9 C     | 0.0009641 |
| rs17146629  | 10 | 5980750 A    | 0  | 9 G     | 0.0009641 |
| rs75554627  | 10 | 5981023 A    | 0  | 9 ACTGT | 0.0009641 |
| rs117897503 | 10 | 5981344 T    | 0  | 9 C     | 0.0009641 |
| rs78846836  | 10 | 5981785 G    | 0  | 9 A     | 0.0009641 |
| rs7905947   | 10 | 9964509 A    | 18 | 37 T    | 0.0004627 |
| 10:10105662 | 10 | 10105662 C   | 26 | 8 CA    | 0.000972  |
| rs112216636 | 10 | 13264824 C   | 26 | 7 T     | 0.0007902 |
| rs138997947 | 10 | 13265182 G   | 18 | 3 C     | 0.0009486 |
| rs138069192 | 10 | 13266397 G   | 21 | 3 GA    | 0.0002475 |
| rs78030696  | 10 | 13266871 A   | 20 | 3 G     | 0.000269  |
| rs182805957 | 10 | 19404368 T   | 11 | 0 A     | 0.0007855 |
| rs76522551  | 10 | 19411160 A   | 12 | 0 G     | 0.0003752 |
| rs74477644  | 10 | 19416736 G   | 12 | 0 A     | 0.0003752 |
| rs73591925  | 10 | 19417095 C   | 12 | 0 G     | 0.0003752 |
| rs78076387  | 10 | 19417208 A   | 11 | 0 G     | 0.0007855 |
| rs11013273  | 10 | 23335957 A   | 5  | 21 G    | 0.0002243 |
| rs4748836   | 10 | 23337395 A   | 5  | 21 G    | 0.0002243 |
| rs7099373   | 10 | 25964505 A   | 47 | 22 C    | 0.0008379 |
| rs10629126  | 10 | 25977799 TTA | 50 | 25 T    | 0.0009811 |
| rs10828848  | 10 | 25978231 T   | 50 | 25 A    | 0.0009811 |
| rs10764579  | 10 | 25978342 G   | 50 | 25 A    | 0.0009811 |
| rs10828849  | 10 | 25978533 C   | 50 | 25 T    | 0.0009811 |
| rs11014679  | 10 | 25978963 G   | 50 | 25 T    | 0.0009811 |
| rs10764580  | 10 | 25986499 C   | 29 | 49 G    | 0.0002928 |
| rs786871    | 10 | 26765474 G   | 33 | 10 T    | 0.0003125 |
| rs12414757  | 10 | 26767000 T   | 0  | 9 A     | 0.0009641 |
| rs12412826  | 10 | 26778606 A   | 1  | 13 G    | 0.0003716 |
| rs112903628 | 10 | 26780794 A   | 1  | 13 G    | 0.0003716 |
| rs72803274  | 10 | 26782556 A   | 1  | 13 G    | 0.0003716 |
| 10:28244637 | 10 | 28244637 A   | 6  | 22 T    | 0.0006607 |
| rs11006790  | 10 | 28262335 G   | 20 | 38 T    | 0.0009963 |

|             |    |             |    |                   |            |
|-------------|----|-------------|----|-------------------|------------|
| rs11595811  | 10 | 28268852 G  | 20 | 38 A              | 0.0009963  |
| rs10826379  | 10 | 28273575 G  | 20 | 38 A              | 0.0009963  |
| rs4747609   | 10 | 28293576 G  | 21 | 40 T              | 0.0006238  |
| rs12411775  | 10 | 28294586 T  | 21 | 40 G              | 0.0006238  |
| rs112635025 | 10 | 29021693 A  | 2  | 15 ATACTTTTTTTTTT | 0.0005115  |
| rs561505    | 10 | 29477518 C  | 11 | 29 T              | 0.0004498  |
| rs6481863   | 10 | 33911780 G  | 17 | 36 A              | 0.0004114  |
| rs7915520   | 10 | 33918423 G  | 17 | 35 T              | 0.0007327  |
| rs1902406   | 10 | 33919875 G  | 17 | 35 T              | 0.0007327  |
| rs4550167   | 10 | 33921708 A  | 17 | 35 G              | 0.0007327  |
| rs4007270   | 10 | 35545637 T  | 18 | 36 C              | 0.0008188  |
| rs72305787  | 10 | 35548597 A  | 12 | 31 ATTGTTTTTTTT   | 0.0003217  |
| rs2176543   | 10 | 42393589 A  | 25 | 6 G               | 0.000538   |
| rs7910103   | 10 | 45368956 C  | 16 | 2 T               | 0.0008956  |
| rs12266568  | 10 | 45369144 C  | 16 | 2 T               | 0.0008956  |
| rs1325170   | 10 | 45369361 G  | 16 | 2 A               | 0.0008956  |
| rs10508890  | 10 | 45370476 C  | 16 | 2 G               | 0.0008956  |
| rs17157164  | 10 | 45370689 T  | 16 | 2 C               | 0.0008956  |
| rs1018702   | 10 | 45371418 T  | 16 | 2 C               | 0.0008956  |
| rs1002321   | 10 | 45371777 C  | 16 | 2 A               | 0.0008956  |
| 10:49239772 | 10 | 49239772 T  | 18 | 3 TGGCCCC         | 0.0008352  |
| rs142912173 | 10 | 49239797 A  | 18 | 3 G               | 0.0008352  |
| rs148445928 | 10 | 49379964 T  | 26 | 44 C              | 0.0008911  |
| rs199919944 | 10 | 49389016 T  | 26 | 44 C              | 0.0008911  |
| rs769008    | 10 | 49390308 G  | 26 | 44 A              | 0.0008911  |
| rs769009    | 10 | 49390449 G  | 26 | 44 T              | 0.0008911  |
| rs2059957   | 10 | 49391118 A  | 26 | 44 G              | 0.0008911  |
| rs931743    | 10 | 49392575 C  | 26 | 44 G              | 0.0008911  |
| 10:49862843 | 10 | 49862843 C  | 0  | 12 CT             | 0.00008299 |
| rs117066139 | 10 | 49876324 T  | 0  | 9 C               | 0.0009641  |
| rs142841563 | 10 | 54999353 A  | 32 | 10 ACACACACT      | 0.0003432  |
| rs11598240  | 10 | 55012303 C  | 40 | 16 T              | 0.0005221  |
| rs56261918  | 10 | 55021278 C  | 39 | 16 T              | 0.0009032  |
| rs12415393  | 10 | 55036000 C  | 40 | 15 T              | 0.0002535  |
| rs11003503  | 10 | 55036929 A  | 40 | 15 G              | 0.0002535  |
| rs55985090  | 10 | 55037182 A  | 43 | 17 T              | 0.0001922  |
| rs7896245   | 10 | 55037271 A  | 43 | 16 T              | 0.00009051 |
| rs58023733  | 10 | 55038244 CT | 43 | 16 C              | 0.00009051 |
| rs12359540  | 10 | 55040055 C  | 41 | 14 G              | 0.00006312 |
| rs112215165 | 10 | 55813123 C  | 0  | 9 A               | 0.0009641  |
| rs75285476  | 10 | 55815450 T  | 0  | 9 C               | 0.0009641  |

|             |    |              |    |              |            |
|-------------|----|--------------|----|--------------|------------|
| rs4007215   | 10 | 56337604 A   | 33 | 11 AAATAAATG | 0.0006951  |
| rs72803974  | 10 | 59064431 C   | 0  | 9 T          | 0.0009641  |
| rs72803979  | 10 | 59090003 A   | 0  | 9 G          | 0.0009641  |
| 10:61618959 | 10 | 61618959 A   | 0  | 10 T         | 0.0004869  |
| 10:66724249 | 10 | 66724249 G   | 18 | 3 A          | 0.0009486  |
| rs36108765  | 10 | 70470256 A   | 1  | 14 AT        | 0.0002194  |
| rs35349003  | 10 | 70470266 A   | 1  | 14 T         | 0.0001932  |
| 10:70876187 | 10 | 70876187 G   | 14 | 0 GTGTT      | 0.00007607 |
| rs7075372   | 10 | 72900980 C   | 25 | 44 T         | 0.000488   |
| rs10740366  | 10 | 72901958 A   | 25 | 44 G         | 0.000488   |
| rs10733879  | 10 | 72902150 G   | 25 | 44 T         | 0.000488   |
| rs10740367  | 10 | 72902249 G   | 25 | 44 A         | 0.000488   |
| rs2153711   | 10 | 72902948 C   | 25 | 44 G         | 0.000488   |
| rs1935152   | 10 | 72903780 C   | 25 | 43 T         | 0.0008649  |
| rs10762427  | 10 | 72905452 T   | 25 | 44 C         | 0.000488   |
| rs10823695  | 10 | 72905671 G   | 25 | 44 A         | 0.000488   |
| rs7922229   | 10 | 72905832 C   | 25 | 44 T         | 0.000488   |
| rs7922634   | 10 | 72906185 C   | 25 | 44 T         | 0.000488   |
| rs7922758   | 10 | 72906326 A   | 25 | 44 T         | 0.000488   |
| rs1417914   | 10 | 72906390 T   | 25 | 44 C         | 0.000488   |
| rs1417916   | 10 | 72906547 T   | 25 | 44 C         | 0.000488   |
| rs3058460   | 10 | 72906653 CCT | 25 | 44 C         | 0.000488   |
| rs10762428  | 10 | 72907298 T   | 25 | 44 C         | 0.000488   |
| rs7911205   | 10 | 72907766 C   | 25 | 44 A         | 0.000488   |
| rs7900002   | 10 | 72907951 G   | 25 | 44 T         | 0.000488   |
| rs1417918   | 10 | 72909867 T   | 25 | 44 G         | 0.000488   |
| rs1935155   | 10 | 72910752 C   | 25 | 44 T         | 0.000488   |
| rs2069017   | 10 | 72913419 T   | 25 | 44 G         | 0.000488   |
| rs7070114   | 10 | 72915944 T   | 25 | 44 C         | 0.000488   |
| rs7075641   | 10 | 72917390 A   | 25 | 44 G         | 0.000488   |
| rs11400244  | 10 | 72917529 AT  | 25 | 44 A         | 0.000488   |
| 10:72917531 | 10 | 72917531 AT  | 25 | 44 A         | 0.000488   |
| rs10509331  | 10 | 72919002 G   | 25 | 44 A         | 0.000488   |
| rs947363    | 10 | 72921265 T   | 25 | 44 C         | 0.000488   |
| rs1417910   | 10 | 72925977 C   | 25 | 44 T         | 0.000488   |
| rs10823699  | 10 | 72926445 A   | 25 | 44 T         | 0.000488   |
| rs1539136   | 10 | 72928131 G   | 25 | 44 A         | 0.000488   |
| rs1539135   | 10 | 72929567 T   | 24 | 44 C         | 0.0002594  |
| rs34868680  | 10 | 72935262 T   | 25 | 44 TA        | 0.000488   |
| rs10823700  | 10 | 72939292 C   | 23 | 42 T         | 0.0004519  |
| rs1935137   | 10 | 72941577 A   | 25 | 44 G         | 0.000488   |



|             |    |             |    |         |             |
|-------------|----|-------------|----|---------|-------------|
| rs10740368  | 10 | 72942724 C  | 25 | 44 G    | 0.000488    |
| rs10762429  | 10 | 72942725 A  | 25 | 44 G    | 0.000488    |
| rs1124754   | 10 | 72956842 G  | 26 | 44 A    | 0.0008911   |
| rs75086736  | 10 | 76287135 C  | 0  | 9 A     | 0.0009641   |
| rs35735588  | 10 | 81095875 T  | 0  | 9 C     | 0.0009641   |
| 10:83017314 | 10 | 83017314 C  | 9  | 31 T    | 0.000008514 |
| rs399496    | 10 | 90526585 C  | 16 | 34 T    | 0.0006492   |
| rs367605    | 10 | 90530164 C  | 16 | 34 T    | 0.0006492   |
| rs435742    | 10 | 90531169 T  | 16 | 34 A    | 0.0006492   |
| rs814630    | 10 | 90532331 G  | 16 | 34 A    | 0.0006492   |
| rs303467    | 10 | 90533235 G  | 16 | 34 A    | 0.0006492   |
| rs303483    | 10 | 90537352 C  | 16 | 34 T    | 0.0006492   |
| rs303488    | 10 | 90538984 A  | 16 | 34 T    | 0.0006492   |
| rs303489    | 10 | 90539246 G  | 16 | 34 A    | 0.0006492   |
| rs303474    | 10 | 90543359 G  | 16 | 34 T    | 0.0006492   |
| rs303478    | 10 | 90545972 T  | 16 | 34 G    | 0.0006492   |
| rs303479    | 10 | 90546007 A  | 16 | 34 G    | 0.0006492   |
| rs303500    | 10 | 90553417 C  | 17 | 35 A    | 0.0007327   |
| rs303502    | 10 | 90554113 T  | 16 | 35 C    | 0.000362    |
| rs845134    | 10 | 90558717 T  | 16 | 35 C    | 0.000362    |
| rs303541    | 10 | 90560417 T  | 16 | 35 G    | 0.000362    |
| rs303539    | 10 | 90561586 A  | 16 | 35 T    | 0.000362    |
| rs303537    | 10 | 90563593 T  | 16 | 35 C    | 0.000362    |
| rs303532    | 10 | 90566243 A  | 16 | 35 T    | 0.000362    |
| rs303531    | 10 | 90566474 C  | 16 | 35 G    | 0.000362    |
| 10:92193527 | 10 | 92193527 C  | 12 | 0 G     | 0.0003752   |
| rs1107172   | 10 | 108622962 T | 45 | 20 C    | 0.0007326   |
| rs874888    | 10 | 108623933 A | 45 | 20 T    | 0.0007326   |
| rs11193079  | 10 | 108624572 G | 45 | 20 A    | 0.0007326   |
| rs1596035   | 10 | 109359014 A | 9  | 25 C    | 0.0008942   |
| rs7910132   | 10 | 109361036 G | 9  | 25 C    | 0.0008942   |
| rs10509839  | 10 | 109372314 A | 9  | 26 G    | 0.0004896   |
| rs10787031  | 10 | 109374851 G | 12 | 32 A    | 0.0001005   |
| rs2083597   | 10 | 109375673 A | 12 | 32 G    | 0.0001005   |
| rs2083596   | 10 | 109375778 C | 11 | 32 G    | 0.00006919  |
| rs11193655  | 10 | 109499145 A | 8  | 24 G    | 0.0006758   |
| rs11193656  | 10 | 109499230 T | 8  | 24 A    | 0.0006758   |
| rs11193659  | 10 | 109500575 C | 7  | 22 T    | 0.0009169   |
| rs12779296  | 10 | 109501113 T | 7  | 22 C    | 0.0009169   |
| rs10787217  | 10 | 111621103 A | 11 | 28 T    | 0.0008103   |
| rs149522291 | 10 | 111622391 A | 10 | 28 AAAT | 0.0003491   |

|             |    |                       |    |                 |            |
|-------------|----|-----------------------|----|-----------------|------------|
| rs10787219  | 10 | 111622694 A           | 10 | 28 G            | 0.0003491  |
| rs492943    | 10 | 111629030 T           | 10 | 28 A            | 0.0003491  |
| rs11280729  | 10 | 111630048 ACTAAATAAAT | 10 | 28 A            | 0.0003491  |
| rs3740137   | 10 | 111630917 A           | 10 | 28 G            | 0.0003491  |
| rs3740138   | 10 | 111630931 T           | 10 | 28 C            | 0.0003491  |
| rs3818285   | 10 | 111635212 C           | 10 | 28 T            | 0.0003491  |
| rs550697    | 10 | 111637286 A           | 23 | 41 G            | 0.0008021  |
| rs4918469   | 10 | 111639314 G           | 10 | 28 T            | 0.0003491  |
| rs35712139  | 10 | 111642934 C           | 10 | 28 T            | 0.0003491  |
| rs35420248  | 10 | 111643074 T           | 10 | 28 C            | 0.0003491  |
| rs112957942 | 10 | 111646907 A           | 10 | 28 ACAAAGCTTTAT | 0.0003491  |
| rs180946    | 10 | 115709203 C           | 29 | 9 A             | 0.0008145  |
| rs151547    | 10 | 115715046 A           | 29 | 9 G             | 0.0008145  |
| rs151592    | 10 | 115716300 A           | 33 | 11 G            | 0.0006951  |
| rs181507    | 10 | 119165059 T           | 19 | 3 C             | 0.0005082  |
| rs4612716   | 10 | 119619382 T           | 41 | 16 C            | 0.0002964  |
| rs7909866   | 10 | 119619858 G           | 42 | 15 A            | 0.00007618 |
| rs7909868   | 10 | 119619859 G           | 43 | 16 A            | 0.00009051 |
| rs6585465   | 10 | 119620559 C           | 43 | 16 T            | 0.00009051 |
| rs4752125   | 10 | 119621333 A           | 42 | 16 G            | 0.0001653  |
| rs6585466   | 10 | 119621697 A           | 43 | 16 G            | 0.00009051 |
| rs6585467   | 10 | 119621825 G           | 43 | 16 A            | 0.00009051 |
| rs7087992   | 10 | 119621839 C           | 43 | 16 T            | 0.00009051 |
| rs7070315   | 10 | 119622054 G           | 43 | 16 A            | 0.00009051 |
| rs28522668  | 10 | 125722454 G           | 2  | 14 C            | 0.0009649  |
| rs112396487 | 10 | 127613117 G           | 4  | 18 A            | 0.0009242  |
| rs1887097   | 10 | 129236512 G           | 20 | 40 A            | 0.0003188  |
| rs2275052   | 10 | 129237580 T           | 15 | 33 C            | 0.0005689  |
| rs11815834  | 10 | 129238058 G           | 15 | 33 A            | 0.0005689  |
| rs200992214 | 10 | 129931769 C           | 1  | 14 T            | 0.0002194  |
| rs551275    | 10 | 131036836 A           | 18 | 3 C             | 0.0009486  |
| rs570306    | 10 | 131037021 A           | 18 | 3 G             | 0.0009486  |
| rs526562    | 10 | 131037236 A           | 18 | 3 G             | 0.0009486  |
| rs10644519  | 10 | 131037354 A           | 18 | 3 ACC           | 0.0009486  |
| rs522855    | 10 | 131037638 T           | 18 | 3 C             | 0.0009486  |
| rs493861    | 10 | 131038424 T           | 18 | 3 C             | 0.0009486  |
| rs496556    | 10 | 131038682 C           | 18 | 3 G             | 0.0009486  |
| rs496646    | 10 | 131038717 A           | 18 | 3 G             | 0.0009486  |
| rs542661    | 10 | 131039216 G           | 18 | 3 T             | 0.0009486  |
| rs524697    | 10 | 131039430 T           | 18 | 3 C             | 0.0009486  |
| rs538186    | 10 | 131039698 C           | 18 | 3 T             | 0.0009486  |

|              |    |                         |    |               |            |
|--------------|----|-------------------------|----|---------------|------------|
| rs514158     | 10 | 131040058 C             | 18 | 3 A           | 0.0009486  |
| rs555260     | 10 | 131040521 A             | 18 | 3 G           | 0.0009486  |
| rs507756     | 10 | 131040776 G             | 18 | 3 A           | 0.0009486  |
| rs506910     | 10 | 131040856 T             | 18 | 3 C           | 0.0009486  |
| rs481938     | 10 | 131041246 T             | 18 | 3 A           | 0.0009486  |
| rs481105     | 10 | 131041310 T             | 18 | 3 C           | 0.0009486  |
| rs473925     | 10 | 131041379 C             | 18 | 3 T           | 0.0009486  |
| rs499933     | 10 | 131041897 C             | 18 | 3 T           | 0.0009486  |
| rs500009     | 10 | 131041918 G             | 18 | 3 C           | 0.0009486  |
| rs504586     | 10 | 131042419 T             | 18 | 3 C           | 0.0009486  |
| rs531984     | 10 | 131043103 G             | 18 | 3 A           | 0.0009486  |
| rs532836     | 10 | 131043152 G             | 18 | 3 C           | 0.0009486  |
| rs532788     | 10 | 131043179 T             | 18 | 3 C           | 0.0009486  |
| rs499815     | 10 | 131044482 C             | 18 | 3 G           | 0.0009486  |
| rs482817     | 10 | 131045160 C             | 18 | 3 T           | 0.0009486  |
| rs579888     | 10 | 131045400 C             | 18 | 3 A           | 0.0009486  |
| rs578926     | 10 | 131045539 T             | 18 | 3 G           | 0.0009486  |
| rs514976     | 10 | 131046363 G             | 18 | 3 C           | 0.0009486  |
| rs11597527   | 10 | 131047724 A             | 18 | 3 G           | 0.0009486  |
| rs514712     | 10 | 131050546 C             | 18 | 3 A           | 0.0009486  |
| rs61859447   | 10 | 131051754 C             | 18 | 3 T           | 0.0009486  |
| rs534451     | 10 | 131051873 T             | 18 | 3 C           | 0.0009486  |
| rs1750482    | 10 | 131052204 A             | 18 | 3 G           | 0.0009486  |
| rs61859448   | 10 | 131052387 A             | 18 | 3 C           | 0.0009486  |
| rs6144152    | 10 | 131052977 CTCTCACTCTCTT | 18 | 3 C           | 0.0009486  |
| rs10829622   | 10 | 131519512 C             | 14 | 32 T          | 0.0004925  |
| rs34636064   | 10 | 131519968 C             | 14 | 32 T          | 0.0004925  |
| rs77183314   | 10 | 131520086 A             | 14 | 32 AGCATATTAG | 0.0004925  |
| rs10829623   | 10 | 131520689 C             | 14 | 32 T          | 0.0004925  |
| rs7916932    | 10 | 131520975 A             | 15 | 33 G          | 0.0005689  |
| rs6482752    | 10 | 131524721 G             | 10 | 30 C          | 0.00009899 |
| rs13377140   | 10 | 131526249 T             | 10 | 30 A          | 0.00009899 |
| rs11592158   | 10 | 131526661 A             | 10 | 30 G          | 0.00009899 |
| rs7898934    | 10 | 131529320 T             | 10 | 30 C          | 0.00009899 |
| rs200859248  | 10 | 131531538 C             | 14 | 31 A          | 0.0008795  |
| 10:131532499 | 10 | 131532499 C             | 11 | 31 T          | 0.0001275  |
| 10:131532754 | 10 | 131532754 G             | 10 | 30 A          | 0.00009899 |
| rs11595020   | 10 | 131536734 A             | 10 | 30 G          | 0.00009899 |
| rs11595599   | 10 | 131537580 A             | 10 | 30 G          | 0.00009899 |
| rs10829627   | 10 | 131567549 T             | 16 | 2 C           | 0.0008956  |
| rs61874499   | 10 | 131637659 G             | 18 | 3 A           | 0.0009486  |

|              |    |             |    |                |            |
|--------------|----|-------------|----|----------------|------------|
| rs9419235    | 10 | 133806576 G | 55 | 27 A           | 0.0002959  |
| rs9419402    | 10 | 133806735 A | 55 | 27 G           | 0.0002959  |
| rs10747071   | 10 | 133810029 G | 53 | 24 A           | 0.00008869 |
| rs9419406    | 10 | 133811201 A | 49 | 24 C           | 0.000936   |
| rs4880276    | 10 | 133815227 A | 49 | 24 C           | 0.000936   |
| 10:134078594 | 10 | 134078594 G | 17 | 2 GTGCCTC      | 0.0003725  |
| 10:134078601 | 10 | 134078601 A | 18 | 2 AAGGGCGGTGAG | 0.0002408  |
| rs10857687   | 10 | 134865155 G | 0  | 9 A            | 0.0009641  |
| rs7130403    | 11 | 346997 A    | 10 | 27 G           | 0.0006386  |
| rs10902081   | 11 | 1079809 C   | 30 | 48 T           | 0.0009571  |
| rs59720353   | 11 | 1489136 T   | 16 | 34 C           | 0.0006492  |
| rs76216459   | 11 | 1489424 T   | 0  | 9 C            | 0.0009641  |
| rs7935956    | 11 | 3181629 T   | 43 | 18 G           | 0.0003905  |
| rs3794015    | 11 | 8264560 T   | 44 | 19 C           | 0.0006784  |
| rs202017636  | 11 | 9624708 CT  | 20 | 43 C           | 0.00009249 |
| rs10770043   | 11 | 9627471 G   | 29 | 48 A           | 0.0005332  |
| rs10831561   | 11 | 11287806 C  | 26 | 45 T           | 0.0005028  |
| rs10741540   | 11 | 11310293 A  | 25 | 44 G           | 0.000488   |
| rs10765829   | 11 | 11310310 G  | 25 | 45 T           | 0.0002688  |
| rs2699446    | 11 | 13729996 G  | 16 | 2 A            | 0.000692   |
| rs12292273   | 11 | 19041455 G  | 1  | 12 A           | 0.0007887  |
| rs11025025   | 11 | 19140352 C  | 18 | 37 A           | 0.0004627  |
| rs11025026   | 11 | 19140385 G  | 18 | 37 A           | 0.0004627  |
| rs4756990    | 11 | 19141210 C  | 19 | 37 T           | 0.0009069  |
| rs1503508    | 11 | 19141721 A  | 19 | 37 C           | 0.0009069  |
| rs10833064   | 11 | 19142375 G  | 18 | 37 A           | 0.0004627  |
| rs11606057   | 11 | 19143110 T  | 19 | 37 G           | 0.0009069  |
| rs10500841   | 11 | 19143383 C  | 18 | 37 A           | 0.0004627  |
| rs4757757    | 11 | 19144144 T  | 18 | 37 C           | 0.0004627  |
| rs11604483   | 11 | 19144579 G  | 19 | 37 A           | 0.0009069  |
| rs11604471   | 11 | 19144724 C  | 19 | 37 T           | 0.0009069  |
| rs11025028   | 11 | 19145288 A  | 19 | 37 G           | 0.0009069  |
| rs1503507    | 11 | 19145847 G  | 18 | 37 A           | 0.0004627  |
| rs1503506    | 11 | 19145974 G  | 18 | 37 A           | 0.0004627  |
| rs10741761   | 11 | 19146531 A  | 18 | 38 G           | 0.0002562  |
| rs7129212    | 11 | 19147268 C  | 18 | 37 T           | 0.0004627  |
| rs7129326    | 11 | 19147327 C  | 18 | 37 T           | 0.0004627  |
| rs7950788    | 11 | 19147479 G  | 18 | 37 A           | 0.0004627  |
| rs7950603    | 11 | 19147562 A  | 18 | 37 C           | 0.0004627  |
| rs4757758    | 11 | 19155035 G  | 18 | 37 A           | 0.0004627  |
| rs4757759    | 11 | 19155219 A  | 18 | 37 G           | 0.0004627  |

|             |    |             |    |        |           |
|-------------|----|-------------|----|--------|-----------|
| rs7111105   | 11 | 19155554 G  | 18 | 38 T   | 0.0002893 |
| rs10766528  | 11 | 19156398 C  | 18 | 37 T   | 0.0004627 |
| rs10833065  | 11 | 19156496 C  | 18 | 37 T   | 0.0004627 |
| rs4515942   | 11 | 19156707 C  | 19 | 37 A   | 0.0009069 |
| rs4326774   | 11 | 19156965 G  | 18 | 37 T   | 0.0004627 |
| rs190149361 | 11 | 19161016 T  | 19 | 40 C   | 0.0001566 |
| rs201841380 | 11 | 19161017 G  | 20 | 40 A   | 0.0003188 |
| rs182791328 | 11 | 19161032 A  | 19 | 40 C   | 0.0001726 |
| rs28891775  | 11 | 19161806 A  | 18 | 37 G   | 0.0004627 |
| rs4757760   | 11 | 19166892 C  | 18 | 37 G   | 0.0004627 |
| rs2271001   | 11 | 19167850 A  | 18 | 37 G   | 0.0004627 |
| rs2134622   | 11 | 19169508 G  | 18 | 37 C   | 0.0004627 |
| rs3802796   | 11 | 19171021 C  | 18 | 37 T   | 0.0004627 |
| rs11607797  | 11 | 19178169 A  | 18 | 37 T   | 0.0004627 |
| rs11025037  | 11 | 19178764 C  | 18 | 37 T   | 0.0004627 |
| rs12270581  | 11 | 19179901 A  | 18 | 37 G   | 0.0004627 |
| rs12801321  | 11 | 19181590 A  | 19 | 37 G   | 0.0009069 |
| rs3802797   | 11 | 19182288 T  | 18 | 37 C   | 0.0004627 |
| rs3802798   | 11 | 19182348 C  | 19 | 37 T   | 0.0009069 |
| rs2042688   | 11 | 19186294 C  | 18 | 37 A   | 0.0004627 |
| rs2042687   | 11 | 19186826 A  | 19 | 37 T   | 0.0009069 |
| rs1077686   | 11 | 19208611 C  | 14 | 31 A   | 0.0008795 |
| rs10833073  | 11 | 19218716 C  | 18 | 36 A   | 0.0008188 |
| rs67058053  | 11 | 19795319 T  | 41 | 17 G   | 0.0005984 |
| rs1443116   | 11 | 19797326 A  | 41 | 17 G   | 0.0005984 |
| rs11025254  | 11 | 19797631 C  | 41 | 17 A   | 0.0005984 |
| rs35222325  | 11 | 19797656 A  | 41 | 17 ACT | 0.0005984 |
| rs35383695  | 11 | 19798570 T  | 38 | 14 C   | 0.00067   |
| rs7105344   | 11 | 19840807 T  | 48 | 23 C   | 0.0008881 |
| rs11025272  | 11 | 19841807 C  | 50 | 25 A   | 0.0009811 |
| rs4757852   | 11 | 19846915 T  | 42 | 18 C   | 0.0006782 |
| rs6483616   | 11 | 19848022 T  | 42 | 17 C   | 0.0003422 |
| rs74358636  | 11 | 23039193 GT | 21 | 4 G    | 0.0008104 |
| rs12279454  | 11 | 23042315 T  | 21 | 4 C    | 0.0008104 |
| rs876092    | 11 | 23042621 G  | 21 | 4 T    | 0.0008104 |
| rs28591594  | 11 | 23043884 T  | 21 | 4 C    | 0.0008104 |
| rs11026910  | 11 | 23049858 A  | 21 | 4 G    | 0.0008104 |
| rs10833907  | 11 | 23049880 G  | 21 | 4 A    | 0.0008104 |
| rs10833913  | 11 | 23054483 C  | 21 | 4 T    | 0.0008104 |
| rs11026934  | 11 | 23067120 T  | 21 | 4 C    | 0.0008104 |
| 11:23409741 | 11 | 23409741 T  | 28 | 43 TC  | 0.0003794 |

|             |    |                   |    |                  |            |
|-------------|----|-------------------|----|------------------|------------|
| rs71445462  | 11 | 23567476 TA       | 7  | 24 T             | 0.0002593  |
| rs12799392  | 11 | 26382674 A        | 5  | 19 G             | 0.0008415  |
| rs12790164  | 11 | 26384802 C        | 5  | 19 T             | 0.0008415  |
| rs34253346  | 11 | 26386955 T        | 5  | 19 TG            | 0.0008415  |
| rs12795939  | 11 | 26387285 T        | 5  | 19 A             | 0.0008415  |
| rs77538811  | 11 | 26388005 G        | 5  | 19 A             | 0.0008415  |
| rs12805572  | 11 | 26388890 A        | 5  | 19 T             | 0.0008415  |
| rs34248864  | 11 | 26389892 C        | 5  | 19 A             | 0.0008415  |
| rs12806876  | 11 | 26398012 G        | 5  | 19 T             | 0.0008415  |
| rs12791416  | 11 | 26403015 T        | 5  | 19 C             | 0.0008415  |
| rs12804855  | 11 | 26405037 G        | 4  | 19 A             | 0.0004818  |
| 11:26405044 | 11 | 26405044 T        | 4  | 19 TAGATTGACTGTC | 0.0004818  |
| rs34034555  | 11 | 26406683 G        | 5  | 19 A             | 0.0008415  |
| rs12785352  | 11 | 26410129 G        | 5  | 19 T             | 0.0008415  |
| rs1461378   | 11 | 26410930 A        | 5  | 19 T             | 0.0008415  |
| rs10501048  | 11 | 26412471 A        | 5  | 19 G             | 0.0008415  |
| rs1461383   | 11 | 26414218 G        | 5  | 19 A             | 0.0008415  |
| rs12796591  | 11 | 26415691 A        | 5  | 19 T             | 0.0008415  |
| rs142670140 | 11 | 26415785 T        | 5  | 19 TACTC         | 0.0008415  |
| rs12795514  | 11 | 26415999 C        | 5  | 19 A             | 0.0008415  |
| rs35218098  | 11 | 26418820 T        | 5  | 19 C             | 0.0008415  |
| rs113004698 | 11 | 26419558 G        | 5  | 19 GA            | 0.0008415  |
| rs12791810  | 11 | 26420088 T        | 5  | 19 C             | 0.0008415  |
| rs200695807 | 11 | 26987879 G        | 16 | 2 C              | 0.0008956  |
| 11:27070014 | 11 | 27070014 T        | 3  | 18 G             | 0.0002532  |
| 11:27070015 | 11 | 27070015 G        | 3  | 18 T             | 0.0002532  |
| rs7123921   | 11 | 28428018 C        | 0  | 10 T             | 0.0004292  |
| rs10767981  | 11 | 33043577 G        | 31 | 10 A             | 0.0006062  |
| rs28406816  | 11 | 33048154 A        | 31 | 10 C             | 0.0006062  |
| rs7121724   | 11 | 33048397 T        | 31 | 10 C             | 0.0006062  |
| rs368572891 | 11 | 33056812 GCCTCCTT | 32 | 10 G             | 0.0003432  |
| rs60784034  | 11 | 33097455 TGGCC    | 31 | 10 T             | 0.0006062  |
| rs73491103  | 11 | 33385334 T        | 20 | 2 G              | 0.00006204 |
| rs1065138   | 11 | 34379280 A        | 0  | 11 G             | 0.0001895  |
| rs150240560 | 11 | 34402655 T        | 0  | 11 TC            | 0.0001895  |
| rs10160662  | 11 | 34405010 A        | 0  | 11 C             | 0.0001895  |
| rs11032644  | 11 | 34410017 T        | 0  | 11 C             | 0.0001895  |
| rs12276589  | 11 | 34414176 A        | 0  | 11 T             | 0.0001895  |
| rs12271710  | 11 | 34415592 A        | 0  | 11 G             | 0.0001895  |
| rs684748    | 11 | 35504650 G        | 16 | 1 C              | 0.0001772  |
| rs649640    | 11 | 35508918 G        | 16 | 2 A              | 0.0008956  |

|             |    |                       |    |         |             |
|-------------|----|-----------------------|----|---------|-------------|
| 11:37161690 | 11 | 37161690 TTAA         | 20 | 48 T    | 0.000007287 |
| 11:38232883 | 11 | 38232883 AAGAAAAGAAAA | 0  | 11 A    | 0.0001895   |
| 11:43575363 | 11 | 43575363 C            | 9  | 26 T    | 0.0004896   |
| 11:43575367 | 11 | 43575367 A            | 7  | 24 T    | 0.0002593   |
| rs9971430   | 11 | 43755780 T            | 29 | 9 C     | 0.0008145   |
| rs10838159  | 11 | 43762210 G            | 29 | 9 A     | 0.0008145   |
| rs7110115   | 11 | 43780193 A            | 29 | 9 G     | 0.0008145   |
| rs12273608  | 11 | 43784636 A            | 29 | 9 G     | 0.0008145   |
| rs11037609  | 11 | 43786479 T            | 29 | 9 C     | 0.0008145   |
| rs11037610  | 11 | 43787521 A            | 29 | 9 G     | 0.0008145   |
| rs11037614  | 11 | 43790322 A            | 29 | 9 G     | 0.0008145   |
| rs12363638  | 11 | 43795832 T            | 29 | 9 C     | 0.0008145   |
| rs146985020 | 11 | 43797034 A            | 29 | 9 AT    | 0.0008145   |
| rs10838164  | 11 | 43797474 T            | 29 | 9 C     | 0.0008145   |
| rs6485460   | 11 | 43800689 T            | 29 | 9 G     | 0.0008145   |
| rs10400325  | 11 | 43807002 A            | 29 | 9 G     | 0.0008145   |
| rs10400390  | 11 | 43807392 G            | 29 | 9 T     | 0.0008145   |
| rs11037638  | 11 | 43809833 T            | 29 | 9 C     | 0.0008145   |
| rs10838170  | 11 | 43815600 G            | 29 | 9 A     | 0.0008145   |
| rs16937633  | 11 | 43815806 G            | 29 | 9 A     | 0.0008145   |
| rs6485463   | 11 | 43818055 C            | 29 | 9 T     | 0.0008145   |
| rs10838172  | 11 | 43820208 A            | 29 | 9 C     | 0.0008145   |
| rs7126905   | 11 | 43824778 A            | 29 | 9 G     | 0.0008145   |
| rs7112511   | 11 | 43828094 G            | 29 | 9 A     | 0.0008145   |
| rs11037654  | 11 | 43828759 A            | 29 | 9 G     | 0.0008145   |
| rs10400368  | 11 | 43834451 T            | 29 | 9 G     | 0.0008145   |
| rs147623853 | 11 | 43835087 T            | 29 | 9 TTTTG | 0.0008145   |
| rs59845637  | 11 | 43835714 A            | 29 | 9 AT    | 0.0008145   |
| rs2037296   | 11 | 43836071 A            | 29 | 9 G     | 0.0008145   |
| rs7105125   | 11 | 43840602 A            | 29 | 9 T     | 0.0008145   |
| rs144452302 | 11 | 43845598 G            | 29 | 9 GA    | 0.0008145   |
| rs72005218  | 11 | 43848205 A            | 29 | 9 AAT   | 0.0008145   |
| rs7942607   | 11 | 43849595 C            | 29 | 9 T     | 0.0008145   |
| rs10838183  | 11 | 43855072 G            | 29 | 9 A     | 0.0008145   |
| rs141462246 | 11 | 43870871 CA           | 29 | 9 C     | 0.0008145   |
| rs835998    | 11 | 44931607 T            | 15 | 1 C     | 0.0003561   |
| rs11828734  | 11 | 45227196 G            | 27 | 45 A    | 0.0009136   |
| rs11038354  | 11 | 45227210 G            | 27 | 45 A    | 0.0009136   |
| rs731102    | 11 | 45227974 A            | 27 | 45 G    | 0.0009136   |
| rs7119605   | 11 | 45228340 G            | 25 | 44 A    | 0.000488    |
| rs12226640  | 11 | 45230443 C            | 27 | 45 T    | 0.0009136   |

|             |    |             |    |                   |            |
|-------------|----|-------------|----|-------------------|------------|
| rs3758727   | 11 | 45233671 T  | 27 | 45 A              | 0.0009136  |
| rs3758726   | 11 | 45241581 G  | 27 | 45 A              | 0.0009136  |
| rs11038358  | 11 | 45242558 A  | 27 | 45 G              | 0.0009136  |
| rs11038360  | 11 | 45247314 A  | 27 | 45 C              | 0.0009136  |
| rs3758719   | 11 | 45250447 A  | 27 | 46 C              | 0.0005154  |
| rs11038363  | 11 | 45252267 A  | 27 | 45 C              | 0.0009136  |
| rs79867898  | 11 | 45329146 C  | 1  | 12 T              | 0.0007887  |
| rs111479273 | 11 | 45331745 A  | 1  | 12 T              | 0.0007887  |
| rs2666918   | 11 | 45708930 A  | 39 | 15 G              | 0.0004501  |
| rs2593729   | 11 | 45718385 G  | 39 | 15 T              | 0.0004501  |
| rs1348961   | 11 | 45719734 T  | 39 | 15 A              | 0.0004501  |
| rs2666913   | 11 | 45720898 A  | 39 | 15 G              | 0.0004501  |
| rs2593726   | 11 | 45728743 G  | 39 | 15 A              | 0.0004501  |
| rs2011389   | 11 | 45730269 G  | 39 | 15 A              | 0.0004501  |
| rs17104     | 11 | 45730559 A  | 39 | 14 C              | 0.0002137  |
| rs17105     | 11 | 45730635 C  | 39 | 14 G              | 0.0002137  |
| rs756379    | 11 | 45730783 G  | 39 | 14 A              | 0.0002137  |
| rs11038620  | 11 | 45734981 C  | 39 | 14 T              | 0.0002137  |
| rs2941745   | 11 | 45735172 C  | 39 | 14 A              | 0.0002137  |
| rs2666901   | 11 | 45739162 C  | 39 | 14 T              | 0.0002137  |
| rs2593733   | 11 | 45747590 G  | 35 | 13 T              | 0.000996   |
| rs2593734   | 11 | 45748110 T  | 35 | 13 C              | 0.000996   |
| rs2666897   | 11 | 45749546 G  | 26 | 7 T               | 0.0007902  |
| rs753198    | 11 | 45754962 C  | 35 | 13 T              | 0.000996   |
| rs2666900   | 11 | 45757401 T  | 35 | 13 C              | 0.000996   |
| 11:46052391 | 11 | 46052391 C  | 14 | 0 T               | 0.00008428 |
| rs117529631 | 11 | 46159633 T  | 11 | 0 C               | 0.0007855  |
| 11:48890089 | 11 | 48890089 A  | 2  | 14 C              | 0.0009649  |
| rs200541435 | 11 | 61702896 A  | 3  | 18 AAAAAAAAAAAAAA | 0.0002532  |
| 11:69081228 | 11 | 69081228 AT | 23 | 4 A               | 0.0001164  |
| rs139373254 | 11 | 69436938 C  | 2  | 14 A              | 0.0009649  |
| 11:71910931 | 11 | 71910931 T  | 36 | 12 TGTG           | 0.0001399  |
| rs1793406   | 11 | 75149378 A  | 2  | 14 C              | 0.0009649  |
| rs1871373   | 11 | 80097498 C  | 34 | 12 T              | 0.000839   |
| rs17369284  | 11 | 81022917 G  | 0  | 10 A              | 0.0004292  |
| rs56177670  | 11 | 81023418 A  | 0  | 10 G              | 0.0004292  |
| rs78577737  | 11 | 81026664 T  | 0  | 10 C              | 0.0004292  |
| rs55822564  | 11 | 81030553 G  | 0  | 10 A              | 0.0004292  |
| rs55811617  | 11 | 81030577 T  | 0  | 10 C              | 0.0004292  |
| rs17369881  | 11 | 81031398 C  | 0  | 10 A              | 0.0004292  |
| rs79645796  | 11 | 81031525 G  | 0  | 10 A              | 0.0004292  |



|             |    |               |   |         |           |
|-------------|----|---------------|---|---------|-----------|
| rs74590293  | 11 | 81031537 G    | 0 | 10 T    | 0.0004292 |
| rs17369902  | 11 | 81031588 T    | 0 | 10 G    | 0.0004292 |
| rs142751767 | 11 | 81031639 C    | 0 | 10 CA   | 0.0004292 |
| rs17435637  | 11 | 81032637 A    | 0 | 10 G    | 0.0004292 |
| rs78294947  | 11 | 81033308 C    | 0 | 10 T    | 0.0004292 |
| rs115120279 | 11 | 81033409 C    | 0 | 10 T    | 0.0004292 |
| rs17369997  | 11 | 81034927 C    | 0 | 10 A    | 0.0004292 |
| rs56334566  | 11 | 81035122 T    | 0 | 10 TC   | 0.0004292 |
| rs17141960  | 11 | 81035167 T    | 0 | 10 C    | 0.0004292 |
| rs77455791  | 11 | 81036467 A    | 0 | 10 T    | 0.0004292 |
| rs78348012  | 11 | 81036606 T    | 0 | 10 C    | 0.0004292 |
| rs76083398  | 11 | 81037599 T    | 0 | 10 G    | 0.0004292 |
| rs17370219  | 11 | 81037858 C    | 0 | 10 T    | 0.0004292 |
| rs116957049 | 11 | 81038128 G    | 0 | 10 A    | 0.0004292 |
| rs200508407 | 11 | 81038215 CA   | 0 | 10 C    | 0.0004292 |
| rs77489824  | 11 | 81042247 A    | 0 | 10 C    | 0.0004292 |
| rs79001473  | 11 | 81043432 G    | 0 | 10 A    | 0.0004292 |
| rs77224744  | 11 | 81044607 T    | 0 | 10 C    | 0.0004292 |
| rs114629989 | 11 | 81044656 A    | 0 | 10 G    | 0.0004292 |
| rs182228872 | 11 | 81053076 G    | 0 | 10 T    | 0.0004292 |
| rs185331674 | 11 | 81053077 T    | 0 | 10 C    | 0.0004292 |
| rs80328220  | 11 | 81053637 T    | 0 | 10 A    | 0.0004292 |
| rs147003829 | 11 | 81054364 AT   | 0 | 10 A    | 0.0004292 |
| rs78005260  | 11 | 81054839 A    | 0 | 10 G    | 0.0004292 |
| rs76081894  | 11 | 81057977 C    | 0 | 10 T    | 0.0004292 |
| rs17371832  | 11 | 81059371 T    | 0 | 10 C    | 0.0004292 |
| rs151150014 | 11 | 81060030 CATT | 0 | 10 C    | 0.0004292 |
| rs56240555  | 11 | 81062072 A    | 0 | 10 G    | 0.0004292 |
| rs7114073   | 11 | 81063336 A    | 0 | 10 T    | 0.0004292 |
| rs55908086  | 11 | 81064868 T    | 0 | 10 C    | 0.0004292 |
| rs139935298 | 11 | 81069039 T    | 0 | 10 G    | 0.0004292 |
| rs116471067 | 11 | 81069721 G    | 0 | 10 A    | 0.0004292 |
| rs146868223 | 11 | 81071462 TAC  | 0 | 10 T    | 0.0004292 |
| rs140721601 | 11 | 81071566 T    | 0 | 10 TAC  | 0.0004292 |
| rs17372055  | 11 | 81073164 T    | 0 | 10 C    | 0.0004292 |
| rs17437784  | 11 | 81074310 T    | 0 | 10 C    | 0.0004292 |
| rs56314671  | 11 | 81074741 C    | 0 | 10 T    | 0.0004292 |
| rs72117550  | 11 | 81074777 C    | 0 | 10 CTTG | 0.0004292 |
| rs7358497   | 11 | 81075865 A    | 0 | 10 G    | 0.0004292 |
| rs150387842 | 11 | 81079159 A    | 0 | 10 G    | 0.0004292 |
| rs55725034  | 11 | 81081220 C    | 0 | 9 CT    | 0.000946  |

|             |    |                |    |                  |           |
|-------------|----|----------------|----|------------------|-----------|
| rs56085595  | 11 | 81081353 T     | 0  | 10 C             | 0.0004292 |
| rs200435150 | 11 | 81085102 T     | 0  | 10 TTC           | 0.0004292 |
| rs56025716  | 11 | 81086580 G     | 0  | 10 T             | 0.0004292 |
| rs56032706  | 11 | 81086849 T     | 0  | 10 A             | 0.0004292 |
| rs80138882  | 11 | 81090085 A     | 0  | 10 C             | 0.0004292 |
| rs74639108  | 11 | 81091305 G     | 0  | 10 A             | 0.0004292 |
| rs56043695  | 11 | 81092528 A     | 0  | 10 G             | 0.0004292 |
| rs78927185  | 11 | 81093572 T     | 0  | 10 A             | 0.0004292 |
| rs57921519  | 11 | 81095156 T     | 0  | 10 G             | 0.0004292 |
| rs12292395  | 11 | 81096278 G     | 0  | 10 A             | 0.0004292 |
| rs12288180  | 11 | 81097453 C     | 0  | 10 T             | 0.0004292 |
| rs78410493  | 11 | 81101455 G     | 0  | 10 C             | 0.0004292 |
| rs75692693  | 11 | 81104851 A     | 0  | 10 C             | 0.0004292 |
| rs74374738  | 11 | 81107512 A     | 0  | 10 G             | 0.0004292 |
| rs17439276  | 11 | 81108596 C     | 0  | 10 T             | 0.0004292 |
| rs77564017  | 11 | 81118376 C     | 0  | 10 T             | 0.0004292 |
| rs74941333  | 11 | 81119042 T     | 0  | 10 G             | 0.0004292 |
| rs17439996  | 11 | 81122694 C     | 0  | 10 T             | 0.0004292 |
| rs56135807  | 11 | 81126313 T     | 0  | 10 C             | 0.0004292 |
| rs74502333  | 11 | 81127188 T     | 0  | 10 C             | 0.0004292 |
| 11:81127561 | 11 | 81127561 C     | 0  | 10 CCTCTGTGTGTGT | 0.0004292 |
| rs17440143  | 11 | 81128565 C     | 0  | 10 T             | 0.0004292 |
| rs79149814  | 11 | 81128808 G     | 0  | 9 C              | 0.0008435 |
| rs139433786 | 11 | 81128988 TGATC | 0  | 10 T             | 0.0004292 |
| rs147579820 | 11 | 81129670 CTG   | 0  | 10 C             | 0.0004292 |
| rs17440276  | 11 | 81130250 C     | 0  | 10 G             | 0.0004292 |
| rs148887234 | 11 | 81130953 TGA   | 0  | 10 T             | 0.0004292 |
| rs17440290  | 11 | 81131518 C     | 0  | 10 A             | 0.0004292 |
| rs17440339  | 11 | 81132432 A     | 0  | 10 C             | 0.0004292 |
| rs200466563 | 11 | 87416485 G     | 3  | 17 T             | 0.0005045 |
| rs117847495 | 11 | 101532916 T    | 16 | 2 A              | 0.0008956 |
| rs12274654  | 11 | 103796623 T    | 1  | 12 A             | 0.0007887 |
| rs149519553 | 11 | 104888092 T    | 0  | 10 C             | 0.0004292 |
| rs75888398  | 11 | 104907272 G    | 0  | 10 T             | 0.0004292 |
| rs57086873  | 11 | 110826764 C    | 16 | 34 A             | 0.0006492 |
| rs61906458  | 11 | 114519089 G    | 15 | 1 A              | 0.0003561 |
| rs2459753   | 11 | 114525993 G    | 29 | 48 A             | 0.0005332 |
| rs1712802   | 11 | 114526484 A    | 30 | 48 C             | 0.0009571 |
| rs1712806   | 11 | 114530868 T    | 29 | 48 A             | 0.0005332 |
| rs1607258   | 11 | 114532699 T    | 30 | 48 C             | 0.0009571 |
| rs1607259   | 11 | 114532788 G    | 29 | 48 A             | 0.0005332 |

|             |    |                 |    |          |             |
|-------------|----|-----------------|----|----------|-------------|
| rs1712816   | 11 | 114545978 A     | 29 | 48 C     | 0.0005332   |
| rs1792414   | 11 | 114546149 C     | 29 | 48 G     | 0.0005332   |
| rs35941139  | 11 | 115689375 T     | 0  | 11 C     | 0.0001895   |
| rs12420530  | 11 | 119907605 T     | 17 | 36 G     | 0.0007253   |
| rs677247    | 11 | 125010299 A     | 23 | 41 G     | 0.0008021   |
| rs10634896  | 11 | 125012005 G     | 19 | 37 GAGGA | 0.0009069   |
| rs599150    | 11 | 125012338 A     | 19 | 37 C     | 0.0009069   |
| rs609548    | 11 | 125012945 C     | 24 | 42 A     | 0.0008352   |
| rs609550    | 11 | 125012952 A     | 24 | 42 C     | 0.0008352   |
| rs2919475   | 11 | 125015114 A     | 56 | 29 G     | 0.0005383   |
| rs619552    | 11 | 126397820 A     | 18 | 39 G     | 0.000139    |
| rs497753    | 11 | 127486960 C     | 43 | 19 G     | 0.000761    |
| rs2512642   | 11 | 131277056 A     | 17 | 2 G      | 0.000467    |
| rs12418991  | 11 | 131373390 A     | 2  | 16 G     | 0.0002312   |
| rs143545352 | 11 | 131373569 ACT   | 2  | 15 A     | 0.0004755   |
| rs444328    | 11 | 131374059 T     | 2  | 17 C     | 0.000111    |
| rs116924147 | 12 | 239844 A        | 0  | 9 C      | 0.0009641   |
| rs78004686  | 12 | 608032 A        | 0  | 10 G     | 0.0004292   |
| rs7977619   | 12 | 2335293 G       | 41 | 16 A     | 0.0002575   |
| 12:2335297  | 12 | 2335297 G       | 36 | 11 A     | 0.00005864  |
| rs10774119  | 12 | 3221631 T       | 5  | 20 C     | 0.0004383   |
| rs143642253 | 12 | 3227399 TCCCACA | 4  | 18 T     | 0.0004505   |
| rs11062510  | 12 | 3227503 A       | 4  | 20 G     | 0.0002508   |
| rs12308222  | 12 | 3227855 G       | 5  | 20 C     | 0.0004383   |
| rs77115380  | 12 | 3266644 T       | 1  | 12 C     | 0.0007887   |
| rs11609265  | 12 | 6023222 C       | 16 | 41 T     | 0.000007089 |
| 12:8235380  | 12 | 8235380 T       | 5  | 19 A     | 0.0007163   |
| 12:8235382  | 12 | 8235382 T       | 5  | 19 A     | 0.0007163   |
| rs73062703  | 12 | 10484833 G      | 28 | 7 A      | 0.0002393   |
| rs145800306 | 12 | 10484969 GA     | 28 | 7 G      | 0.0002393   |
| rs12370603  | 12 | 10485242 G      | 50 | 25 C     | 0.0009811   |
| rs10743917  | 12 | 10817402 C      | 42 | 18 T     | 0.0006782   |
| rs10743918  | 12 | 10819922 C      | 40 | 16 A     | 0.0005221   |
| rs10845199  | 12 | 10820318 C      | 40 | 16 T     | 0.0005221   |
| rs7297205   | 12 | 10820840 T      | 41 | 17 C     | 0.0005984   |
| rs7977694   | 12 | 10822695 T      | 41 | 17 C     | 0.0005984   |
| rs10772348  | 12 | 10822914 G      | 41 | 17 A     | 0.0005984   |
| 12:14983473 | 12 | 14983473 A      | 11 | 28 G     | 0.0007702   |
| rs645395    | 12 | 18796472 T      | 16 | 2 G      | 0.0008956   |
| 12:18920312 | 12 | 18920312 C      | 11 | 0 CA     | 0.0007855   |
| rs143552182 | 12 | 18949309 G      | 11 | 0 C      | 0.0007855   |

|             |    |              |    |                  |            |
|-------------|----|--------------|----|------------------|------------|
| rs117581727 | 12 | 19002330 T   | 11 | 0 C              | 0.0007855  |
| rs200443741 | 12 | 19849037 G   | 29 | 48 GTT           | 0.0008916  |
| rs2731615   | 12 | 19928758 A   | 34 | 12 C             | 0.000839   |
| rs61925727  | 12 | 23969278 A   | 18 | 36 G             | 0.0008188  |
| rs4424758   | 12 | 23975993 A   | 18 | 36 C             | 0.0008188  |
| rs113537256 | 12 | 29752901 A   | 1  | 12 ATG           | 0.0008498  |
| 12:29752905 | 12 | 29752905 A   | 1  | 12 G             | 0.0008498  |
| rs61924380  | 12 | 42871306 G   | 3  | 16 A             | 0.0005264  |
| rs61924381  | 12 | 42871308 G   | 3  | 16 A             | 0.0005264  |
| rs11388170  | 12 | 48232487 C   | 42 | 18 CG            | 0.0005763  |
| rs11168266  | 12 | 48251533 C   | 43 | 19 T             | 0.000761   |
| rs11170000  | 12 | 52491833 A   | 4  | 21 G             | 0.00006677 |
| 12:52492295 | 12 | 52492295 A   | 43 | 16 G             | 0.00006634 |
| rs9738139   | 12 | 52535246 C   | 13 | 30 T             | 0.0007578  |
| rs146809456 | 12 | 53640383 A   | 0  | 10 G             | 0.0004869  |
| rs7312770   | 12 | 56467587 T   | 31 | 50 C             | 0.0005409  |
| rs117120119 | 12 | 57237463 G   | 11 | 0 C              | 0.0007855  |
| rs56064527  | 12 | 58862337 T   | 0  | 10 A             | 0.0004292  |
| rs34214690  | 12 | 58942658 CAG | 20 | 38 C             | 0.0009963  |
| rs11172810  | 12 | 59294631 G   | 2  | 14 A             | 0.0009649  |
| rs73118573  | 12 | 59303764 A   | 2  | 14 G             | 0.0009649  |
| rs4758753   | 12 | 60880942 A   | 7  | 23 G             | 0.0004919  |
| rs57389490  | 12 | 60881991 G   | 7  | 23 C             | 0.0004919  |
| rs73127375  | 12 | 60883266 T   | 7  | 23 C             | 0.0004919  |
| rs74094136  | 12 | 60883337 T   | 7  | 23 C             | 0.0004919  |
| rs11173493  | 12 | 60884349 A   | 7  | 23 T             | 0.0004919  |
| rs10219669  | 12 | 60890065 C   | 7  | 23 G             | 0.0004919  |
| rs11173495  | 12 | 60890422 A   | 7  | 23 G             | 0.0004919  |
| rs17123875  | 12 | 60892973 G   | 7  | 23 A             | 0.0004919  |
| 12:62007949 | 12 | 62007949 C   | 0  | 10 CA            | 0.0004292  |
| 12:62007951 | 12 | 62007951 C   | 0  | 10 CACACACACACAC | 0.0004292  |
| rs4763025   | 12 | 63061997 T   | 11 | 29 A             | 0.0004498  |
| rs10710091  | 12 | 63062464 G   | 11 | 28 GT            | 0.0008103  |
| rs12300897  | 12 | 69365845 C   | 14 | 1 T              | 0.0007094  |
| rs10450797  | 12 | 69367815 A   | 14 | 1 G              | 0.0007094  |
| rs12298772  | 12 | 69370438 C   | 14 | 1 T              | 0.0007094  |
| rs199594330 | 12 | 69515046 A   | 7  | 22 AAAAG         | 0.0008783  |
| rs73139273  | 12 | 72711299 T   | 0  | 10 C             | 0.0004292  |
| rs73144999  | 12 | 72752908 G   | 0  | 10 A             | 0.0004292  |
| rs201692960 | 12 | 72754780 G   | 1  | 12 GC            | 0.0007887  |
| rs368610674 | 12 | 72767102 C   | 1  | 12 T             | 0.0007887  |

|             |    |             |    |                  |            |
|-------------|----|-------------|----|------------------|------------|
| rs372909689 | 12 | 72767107 T  | 1  | 12 C             | 0.0007887  |
| rs377070019 | 12 | 72767108 G  | 1  | 12 A             | 0.0007887  |
| rs73146906  | 12 | 72783553 G  | 0  | 10 A             | 0.0004292  |
| rs73146915  | 12 | 72798547 A  | 1  | 12 G             | 0.0007887  |
| 12:73570125 | 12 | 73570125 C  | 0  | 13 CACACACACACAC | 0.0003603  |
| rs35782366  | 12 | 73733999 G  | 1  | 12 A             | 0.0007887  |
| rs145808635 | 12 | 73791877 G  | 0  | 11 A             | 0.0001604  |
| rs201246630 | 12 | 73792138 CA | 0  | 11 C             | 0.0001895  |
| rs117155171 | 12 | 73825708 A  | 0  | 9 G              | 0.0009641  |
| rs12815472  | 12 | 73998450 T  | 0  | 9 C              | 0.0009641  |
| rs146922274 | 12 | 77467304 T  | 1  | 12 TTTTA         | 0.0007887  |
| rs61932809  | 12 | 77468993 T  | 1  | 12 C             | 0.0007887  |
| rs61930667  | 12 | 77472384 A  | 1  | 12 T             | 0.0007887  |
| rs61930670  | 12 | 77475922 G  | 1  | 12 A             | 0.0007887  |
| rs61930671  | 12 | 77478571 T  | 1  | 12 C             | 0.0007887  |
| rs11610700  | 12 | 77482684 A  | 1  | 12 C             | 0.0007887  |
| rs930645    | 12 | 77492338 T  | 10 | 31 A             | 0.00005135 |
| rs7298978   | 12 | 77493397 T  | 10 | 31 C             | 0.00005135 |
| rs76566838  | 12 | 77495670 A  | 1  | 12 AGCC          | 0.0007887  |
| rs61930294  | 12 | 77496073 A  | 1  | 12 G             | 0.0007887  |
| rs74633707  | 12 | 77499208 A  | 1  | 12 G             | 0.0007887  |
| rs56149569  | 12 | 77500698 C  | 1  | 12 T             | 0.0007887  |
| rs9971921   | 12 | 77501316 T  | 1  | 12 C             | 0.0007887  |
| rs61930296  | 12 | 77502598 A  | 1  | 12 G             | 0.0007887  |
| rs78152080  | 12 | 77503218 T  | 1  | 12 C             | 0.0007887  |
| rs75366818  | 12 | 77503221 C  | 1  | 12 T             | 0.0007887  |
| rs59223587  | 12 | 77503897 T  | 1  | 12 C             | 0.0007887  |
| rs61930298  | 12 | 77504676 G  | 1  | 12 A             | 0.0007887  |
| rs10506730  | 12 | 77508673 G  | 1  | 12 A             | 0.0007887  |
| rs10506731  | 12 | 77509089 G  | 1  | 12 A             | 0.0007887  |
| rs11610352  | 12 | 77510711 G  | 1  | 12 A             | 0.0007887  |
| rs72615642  | 12 | 77511067 C  | 9  | 27 T             | 0.0002633  |
| rs1868356   | 12 | 77515225 G  | 9  | 27 A             | 0.0002633  |
| rs11117188  | 12 | 77515573 G  | 9  | 27 A             | 0.0002633  |
| rs10858400  | 12 | 77519228 T  | 9  | 27 C             | 0.0002633  |
| rs7487338   | 12 | 77520190 G  | 0  | 11 A             | 0.0001555  |
| rs1874887   | 12 | 77520378 C  | 9  | 27 G             | 0.0002633  |
| rs771617    | 12 | 77531634 A  | 11 | 30 G             | 0.0002453  |
| rs771659    | 12 | 77540253 T  | 10 | 29 C             | 0.0001875  |
| rs1112921   | 12 | 77714826 T  | 38 | 15 C             | 0.0007851  |
| rs60172725  | 12 | 77719625 C  | 41 | 15 T             | 0.0001402  |

|             |    |                |    |              |            |
|-------------|----|----------------|----|--------------|------------|
| rs11614989  | 12 | 78746493 C     | 29 | 47 A         | 0.0009467  |
| rs148372708 | 12 | 80431354 GTCTA | 0  | 9 G          | 0.0009641  |
| rs5009830   | 12 | 82069012 T     | 3  | 17 G         | 0.0005045  |
| rs61929509  | 12 | 83042393 A     | 17 | 35 G         | 0.0007327  |
| rs12370635  | 12 | 84468344 G     | 11 | 0 A          | 0.0007855  |
| rs4275668   | 12 | 94258196 C     | 49 | 24 T         | 0.000936   |
| rs11107224  | 12 | 94258226 C     | 49 | 24 G         | 0.000936   |
| rs4258423   | 12 | 94258229 T     | 49 | 24 C         | 0.000936   |
| rs2028204   | 12 | 94258282 G     | 24 | 48 A         | 0.0000187  |
| rs1002121   | 12 | 94258726 C     | 49 | 24 T         | 0.000936   |
| rs1493855   | 12 | 94258930 G     | 31 | 50 A         | 0.0005409  |
| rs1493854   | 12 | 94259043 T     | 31 | 50 A         | 0.0005409  |
| rs11378803  | 12 | 94259600 A     | 20 | 44 AT        | 0.00001503 |
| rs4761747   | 12 | 94259772 T     | 24 | 47 C         | 0.00003747 |
| rs55956322  | 12 | 94265605 G     | 49 | 24 T         | 0.000936   |
| rs7134396   | 12 | 94266865 G     | 31 | 10 A         | 0.0006062  |
| rs76846711  | 12 | 94267015 GA    | 49 | 24 G         | 0.000936   |
| rs35784448  | 12 | 94267327 G     | 49 | 24 A         | 0.000936   |
| rs34243602  | 12 | 94269027 GT    | 50 | 24 G         | 0.0005368  |
| rs7306328   | 12 | 94269138 G     | 21 | 44 A         | 0.00003223 |
| rs7136883   | 12 | 94269207 C     | 49 | 24 T         | 0.000936   |
| rs4761531   | 12 | 94269467 A     | 49 | 24 C         | 0.000936   |
| rs4761532   | 12 | 94269672 G     | 49 | 24 A         | 0.000936   |
| rs61927337  | 12 | 94269974 T     | 49 | 24 C         | 0.000936   |
| rs71443557  | 12 | 94270817 A     | 49 | 24 AGTAACACT | 0.000936   |
| rs1493853   | 12 | 94271275 T     | 31 | 50 C         | 0.0005409  |
| rs1493852   | 12 | 94271348 T     | 49 | 24 C         | 0.000936   |
| rs7969712   | 12 | 94272243 C     | 49 | 24 T         | 0.000936   |
| rs7969978   | 12 | 94272451 C     | 49 | 24 T         | 0.000936   |
| rs35613486  | 12 | 94272580 G     | 49 | 24 A         | 0.000936   |
| rs11107231  | 12 | 94273453 A     | 31 | 10 T         | 0.0006062  |
| rs11107232  | 12 | 94273459 G     | 31 | 10 A         | 0.0006062  |
| rs7980263   | 12 | 94289089 T     | 18 | 3 C          | 0.0009486  |
| 12:94291604 | 12 | 94291604 C     | 14 | 0 CCG        | 0.00007607 |
| rs12368075  | 12 | 94293569 A     | 19 | 3 G          | 0.0005082  |
| rs12371409  | 12 | 94293757 G     | 19 | 3 A          | 0.0005082  |
| rs11107251  | 12 | 94293988 T     | 18 | 3 C          | 0.0009486  |
| rs17790566  | 12 | 94294235 A     | 18 | 3 G          | 0.0009486  |
| 12:94294689 | 12 | 94294689 A     | 18 | 3 C          | 0.0009486  |
| rs11107257  | 12 | 94304153 A     | 40 | 17 G         | 0.0009663  |
| rs74728968  | 12 | 94936045 A     | 0  | 10 C         | 0.0003596  |

|              |    |             |    |         |            |
|--------------|----|-------------|----|---------|------------|
| rs12824690   | 12 | 94948451 G  | 2  | 16 C    | 0.0002312  |
| rs35677689   | 12 | 94950003 T  | 1  | 13 G    | 0.0003716  |
| rs17022724   | 12 | 94952716 T  | 1  | 13 G    | 0.0003716  |
| rs78104341   | 12 | 94966993 C  | 31 | 49 CTCA | 0.0009634  |
| rs1274525    | 12 | 94968493 G  | 31 | 49 A    | 0.0009634  |
| rs1274528    | 12 | 94969866 A  | 31 | 49 T    | 0.0009634  |
| rs1274529    | 12 | 94969872 G  | 31 | 49 A    | 0.0009634  |
| rs1274530    | 12 | 94970125 A  | 31 | 49 G    | 0.0009634  |
| rs1274531    | 12 | 94970275 A  | 31 | 49 T    | 0.0009634  |
| rs1274532    | 12 | 94970382 T  | 31 | 49 G    | 0.0009634  |
| rs1274533    | 12 | 94970570 A  | 31 | 49 T    | 0.0009634  |
| rs1296197    | 12 | 95024859 T  | 25 | 44 A    | 0.000488   |
| rs1274521    | 12 | 95026753 G  | 25 | 45 A    | 0.0002688  |
| rs1290907    | 12 | 95027785 G  | 30 | 48 A    | 0.0009571  |
| rs71071799   | 12 | 95054585 C  | 5  | 20 CT   | 0.0007845  |
| rs9668373    | 12 | 95179709 C  | 48 | 23 T    | 0.0008881  |
| rs9667991    | 12 | 95179862 T  | 48 | 23 G    | 0.0008881  |
| rs10745707   | 12 | 95284635 G  | 49 | 21 A    | 0.0001359  |
| rs10745708   | 12 | 95284726 G  | 49 | 21 A    | 0.0001359  |
| rs10859781   | 12 | 95284857 C  | 49 | 21 G    | 0.0001359  |
| rs10859782   | 12 | 95284883 C  | 49 | 21 A    | 0.0001359  |
| rs11107774   | 12 | 95285064 G  | 49 | 21 C    | 0.0001359  |
| rs58035116   | 12 | 95285195 GA | 47 | 21 G    | 0.000234   |
| rs10745709   | 12 | 95288047 T  | 49 | 21 C    | 0.0001359  |
| rs3858656    | 12 | 96880553 G  | 3  | 16 A    | 0.0009912  |
| rs2052295    | 12 | 96985378 A  | 0  | 9 T     | 0.0009641  |
| rs73147818   | 12 | 100704733 C | 0  | 10 G    | 0.0004292  |
| rs7969213    | 12 | 101434784 C | 4  | 18 T    | 0.0009242  |
| rs7952812    | 12 | 101439513 G | 7  | 24 C    | 0.0002593  |
| rs2723875    | 12 | 104368449 C | 10 | 27 A    | 0.0006386  |
| rs2629805    | 12 | 104392195 A | 9  | 27 T    | 0.0002909  |
| 12:105526569 | 12 | 105526569 A | 46 | 18 T    | 0.0001043  |
| rs111759074  | 12 | 107644137 T | 1  | 12 C    | 0.0009476  |
| rs7133632    | 12 | 107671301 A | 1  | 12 G    | 0.0007887  |
| rs113627797  | 12 | 107672272 A | 1  | 12 G    | 0.0007887  |
| rs74394042   | 12 | 107672914 G | 1  | 12 T    | 0.0007887  |
| rs117090648  | 12 | 108193398 A | 3  | 18 G    | 0.0002532  |
| rs73191612   | 12 | 108194285 T | 1  | 17 C    | 0.00001632 |
| rs73191615   | 12 | 108199455 T | 2  | 18 C    | 0.00005262 |
| rs73191653   | 12 | 108238939 G | 2  | 15 A    | 0.0004755  |
| rs56786064   | 12 | 108263741 T | 2  | 15 G    | 0.0004755  |

|             |    |                        |    |          |           |
|-------------|----|------------------------|----|----------|-----------|
| rs4766845   | 12 | 117787554 T            | 30 | 9 G      | 0.0004612 |
| rs3782219   | 12 | 117788240 T            | 30 | 9 C      | 0.0004612 |
| rs4767532   | 12 | 117790932 T            | 30 | 9 C      | 0.0004612 |
| rs61938114  | 12 | 119913163 A            | 14 | 1 C      | 0.0007094 |
| rs112287083 | 12 | 124281943 C            | 2  | 15 CT    | 0.0005115 |
| rs4760576   | 12 | 129253864 A            | 18 | 36 G     | 0.0008188 |
| rs113368175 | 13 | 19386067 G             | 15 | 1 A      | 0.0003561 |
| rs376761445 | 13 | 19679763 T             | 18 | 3 G      | 0.0009486 |
| 13:20121862 | 13 | 20121862 TAC           | 14 | 1 T      | 0.0006426 |
| rs11840315  | 13 | 23631746 C             | 34 | 12 T     | 0.000839  |
| rs4770372   | 13 | 23637683 T             | 34 | 12 G     | 0.000839  |
| rs10536822  | 13 | 25493182 G             | 31 | 10 GAGAT | 0.0006062 |
| 13:28831824 | 13 | 28831824 TATAAATATATAT | 1  | 13 T     | 0.0002855 |
| rs7321093   | 13 | 29147841 C             | 29 | 48 T     | 0.0005332 |
| rs7321403   | 13 | 29147852 A             | 36 | 13 G     | 0.0005704 |
| rs7326455   | 13 | 29148277 C             | 29 | 48 T     | 0.0005332 |
| rs3812868   | 13 | 29149341 C             | 29 | 47 G     | 0.0009467 |
| rs3829387   | 13 | 29149693 C             | 31 | 10 A     | 0.0006062 |
| rs7327608   | 13 | 29150120 A             | 29 | 47 G     | 0.0009467 |
| rs2006761   | 13 | 29150147 C             | 29 | 47 A     | 0.0009467 |
| rs7328082   | 13 | 29150190 G             | 29 | 47 A     | 0.0009467 |
| rs7327963   | 13 | 29150273 C             | 29 | 47 G     | 0.0009467 |
| rs6490311   | 13 | 29150759 A             | 29 | 47 G     | 0.0009467 |
| rs327118    | 13 | 29506175 C             | 23 | 41 T     | 0.0008021 |
| rs9508336   | 13 | 29863014 G             | 14 | 33 C     | 0.0002703 |
| rs7319242   | 13 | 29863365 T             | 14 | 32 C     | 0.0004925 |
| rs4769709   | 13 | 29865808 A             | 19 | 37 G     | 0.0009069 |
| rs11365604  | 13 | 29865972 C             | 14 | 32 CA    | 0.0004925 |
| rs118079285 | 13 | 32097993 A             | 0  | 9 G      | 0.0009641 |
| rs377801    | 13 | 33556219 C             | 36 | 13 T     | 0.0005704 |
| 13:49911875 | 13 | 49911875 C             | 3  | 18 CACA  | 0.0002532 |
| rs4942985   | 13 | 51833944 C             | 2  | 14 A     | 0.0009649 |
| rs73194198  | 13 | 51834884 T             | 2  | 14 G     | 0.0009649 |
| rs17837207  | 13 | 51839336 A             | 2  | 14 G     | 0.0009649 |
| rs9592367   | 13 | 65386113 A             | 14 | 1 G      | 0.0007094 |
| rs73200478  | 13 | 65387678 T             | 14 | 1 C      | 0.0007094 |
| rs73200481  | 13 | 65390377 A             | 14 | 1 G      | 0.0007094 |
| rs150865846 | 13 | 65400548 A             | 14 | 1 ATTT   | 0.0007094 |
| rs9598840   | 13 | 65406636 G             | 14 | 1 C      | 0.0007094 |
| rs12429888  | 13 | 65413569 T             | 14 | 1 C      | 0.0007094 |
| rs9598841   | 13 | 65419872 T             | 14 | 1 A      | 0.0007094 |



|             |    |            |    |         |           |
|-------------|----|------------|----|---------|-----------|
| 13:65760777 | 13 | 65760777 A | 25 | 6 T     | 0.0005219 |
| rs7492037   | 13 | 69418044 A | 38 | 13 G    | 0.0001774 |
| rs74096538  | 13 | 75143340 C | 0  | 10 T    | 0.0004292 |
| rs74096539  | 13 | 75143364 A | 0  | 9 C     | 0.0009641 |
| rs74096540  | 13 | 75143442 G | 0  | 10 A    | 0.0004292 |
| rs74094341  | 13 | 75143661 C | 0  | 10 T    | 0.0004292 |
| 13:77819880 | 13 | 77819880 A | 23 | 44 ACAC | 0.0001337 |
| rs475743    | 13 | 80767182 G | 7  | 22 A    | 0.0009169 |
| rs9560773   | 13 | 87414522 C | 30 | 48 T    | 0.0009571 |
| rs9515910   | 13 | 87416030 T | 30 | 48 C    | 0.0009571 |
| rs35420831  | 13 | 87416276 G | 30 | 48 A    | 0.0009571 |
| rs12430623  | 13 | 87416571 C | 30 | 48 A    | 0.0009571 |
| rs9589198   | 13 | 87417865 G | 30 | 48 C    | 0.0009571 |
| rs9523309   | 13 | 87418563 C | 30 | 48 A    | 0.0009571 |
| rs9515916   | 13 | 87419768 A | 30 | 48 G    | 0.0009571 |
| rs4132042   | 13 | 87422551 C | 30 | 48 A    | 0.0009571 |
| rs9515922   | 13 | 87423865 C | 30 | 48 T    | 0.0009571 |
| rs9556082   | 13 | 87425067 G | 30 | 48 C    | 0.0009571 |
| rs9523333   | 13 | 87427762 A | 30 | 48 G    | 0.0009571 |
| rs9556088   | 13 | 87430634 T | 30 | 48 C    | 0.0009571 |
| rs9556089   | 13 | 87430914 C | 47 | 22 T    | 0.0008379 |
| rs6492549   | 13 | 87434336 C | 30 | 48 T    | 0.0009571 |
| rs4261395   | 13 | 87438236 G | 30 | 48 C    | 0.0009571 |
| rs9556102   | 13 | 87439318 T | 30 | 48 C    | 0.0009571 |
| rs9523362   | 13 | 87439915 C | 30 | 49 A    | 0.0005383 |
| rs7332982   | 13 | 87440616 G | 30 | 48 A    | 0.0009571 |
| rs7333973   | 13 | 87441079 G | 30 | 48 C    | 0.0009571 |
| rs7988039   | 13 | 87443524 C | 30 | 48 T    | 0.0009571 |
| rs9515957   | 13 | 87445503 A | 29 | 48 G    | 0.0005332 |
| rs9301741   | 13 | 87446900 A | 29 | 48 C    | 0.0005332 |
| rs9515961   | 13 | 87447243 C | 29 | 48 T    | 0.0005332 |
| rs9301746   | 13 | 87448003 G | 29 | 48 T    | 0.0005332 |
| rs9523390   | 13 | 87448481 C | 29 | 48 T    | 0.0005332 |
| rs3015542   | 13 | 87451410 C | 29 | 48 G    | 0.0005332 |
| rs2992717   | 13 | 87452111 A | 29 | 48 G    | 0.0005332 |
| rs7995257   | 13 | 87453249 A | 29 | 48 G    | 0.0005332 |
| rs2992707   | 13 | 87454536 A | 29 | 48 G    | 0.0005332 |
| rs2992708   | 13 | 87455045 A | 30 | 48 G    | 0.0009571 |
| rs2992711   | 13 | 87457101 T | 29 | 48 A    | 0.0005332 |
| rs9515965   | 13 | 87459754 C | 29 | 48 G    | 0.0005332 |
| rs2992713   | 13 | 87461696 G | 29 | 48 A    | 0.0005332 |

|            |    |            |    |       |            |
|------------|----|------------|----|-------|------------|
| rs2992714  | 13 | 87461949 G | 29 | 48 A  | 0.0005332  |
| rs9523416  | 13 | 87463100 G | 29 | 48 A  | 0.0005332  |
| rs12429287 | 13 | 87469360 A | 48 | 22 G  | 0.0004783  |
| rs9589359  | 13 | 87469749 A | 29 | 48 G  | 0.0005332  |
| rs3015543  | 13 | 87469947 A | 29 | 48 G  | 0.0005332  |
| rs3015512  | 13 | 87471178 C | 29 | 48 A  | 0.0005332  |
| rs4773640  | 13 | 87474932 T | 29 | 48 G  | 0.0005332  |
| rs4287439  | 13 | 87475513 A | 29 | 48 G  | 0.0005332  |
| rs9556132  | 13 | 87476060 C | 29 | 48 T  | 0.0005332  |
| rs7984450  | 13 | 87476225 T | 29 | 48 G  | 0.0005332  |
| rs9515993  | 13 | 87478483 G | 29 | 48 C  | 0.0005332  |
| rs9515995  | 13 | 87479611 T | 29 | 48 C  | 0.0005332  |
| rs7337025  | 13 | 87481267 T | 29 | 48 C  | 0.0005332  |
| rs9560893  | 13 | 87481783 G | 29 | 48 T  | 0.0005332  |
| rs9560911  | 13 | 87490783 C | 28 | 49 T  | 0.000155   |
| rs9523520  | 13 | 87499244 C | 28 | 49 T  | 0.000155   |
| rs4420385  | 13 | 87501789 A | 28 | 49 T  | 0.000155   |
| rs4238296  | 13 | 87506446 G | 27 | 49 A  | 0.00007972 |
| rs9523562  | 13 | 87511042 G | 28 | 49 A  | 0.000155   |
| rs9556166  | 13 | 87514739 G | 28 | 49 T  | 0.000155   |
| rs9556167  | 13 | 87514778 G | 28 | 49 A  | 0.000155   |
| rs9561016  | 13 | 87518870 G | 28 | 49 T  | 0.000155   |
| rs4238298  | 13 | 87527893 T | 30 | 50 C  | 0.0002951  |
| rs7982268  | 13 | 87532943 G | 30 | 50 A  | 0.0002951  |
| rs7330816  | 13 | 87534747 G | 30 | 50 A  | 0.0002951  |
| rs11330429 | 13 | 87540259 C | 51 | 23 CT | 0.000156   |
| rs6492625  | 13 | 87547394 G | 29 | 47 A  | 0.0009467  |
| rs9516118  | 13 | 87552124 G | 29 | 47 T  | 0.0009467  |
| rs7981849  | 13 | 87560377 A | 29 | 47 C  | 0.0009467  |
| rs1718017  | 13 | 87596099 G | 29 | 47 A  | 0.0009467  |
| rs2685796  | 13 | 87603946 A | 29 | 47 G  | 0.0009467  |
| rs969501   | 13 | 87617112 G | 51 | 24 A  | 0.0003012  |
| rs2685792  | 13 | 87627796 A | 29 | 47 C  | 0.0009467  |
| rs2685793  | 13 | 87629552 G | 29 | 47 A  | 0.0009467  |
| rs8000914  | 13 | 87638878 T | 29 | 47 C  | 0.0009467  |
| rs9556308  | 13 | 87641649 G | 29 | 47 T  | 0.0009467  |
| rs2049200  | 13 | 87643970 A | 29 | 47 G  | 0.0009467  |
| rs7319660  | 13 | 87645657 A | 29 | 47 G  | 0.0009467  |
| rs1522014  | 13 | 87658986 A | 29 | 47 G  | 0.0009467  |
| rs9524240  | 13 | 87666355 G | 29 | 47 C  | 0.0009467  |
| rs9524241  | 13 | 87666356 A | 29 | 47 T  | 0.0009467  |

|             |    |                        |    |       |            |
|-------------|----|------------------------|----|-------|------------|
| rs1040286   | 13 | 87668544 T             | 29 | 47 C  | 0.0009467  |
| rs926016    | 13 | 87668961 T             | 29 | 47 C  | 0.0009467  |
| rs9301917   | 13 | 87674122 C             | 29 | 47 A  | 0.0009467  |
| rs34520380  | 13 | 87678333 C             | 29 | 47 T  | 0.0009467  |
| rs9561480   | 13 | 87679842 A             | 29 | 47 G  | 0.0009467  |
| rs1543232   | 13 | 87682869 A             | 29 | 47 G  | 0.0009467  |
| rs6492695   | 13 | 87695546 G             | 29 | 48 A  | 0.0005332  |
| rs9524345   | 13 | 87700013 C             | 29 | 48 T  | 0.0005332  |
| rs9524365   | 13 | 87702747 A             | 29 | 48 T  | 0.0005332  |
| rs9524367   | 13 | 87703310 T             | 29 | 48 G  | 0.0005332  |
| rs9516366   | 13 | 87705456 C             | 29 | 48 T  | 0.0005332  |
| rs9556359   | 13 | 87706470 T             | 29 | 48 C  | 0.0005332  |
| rs9524373   | 13 | 87706576 A             | 29 | 48 G  | 0.0005332  |
| rs9516372   | 13 | 87709360 C             | 29 | 48 T  | 0.0005332  |
| rs9516374   | 13 | 87709690 C             | 29 | 48 T  | 0.0005332  |
| rs9524401   | 13 | 87712675 A             | 29 | 48 G  | 0.0005332  |
| rs9561541   | 13 | 87719368 A             | 29 | 48 T  | 0.0005332  |
| rs9561544   | 13 | 87720442 G             | 29 | 48 A  | 0.0005332  |
| rs7987894   | 13 | 87722426 G             | 29 | 48 T  | 0.0005332  |
| rs5805422   | 13 | 87723820 TAGAG         | 29 | 48 T  | 0.0005332  |
| rs34773214  | 13 | 87724838 TCAAA         | 29 | 48 T  | 0.0005332  |
| rs9645930   | 13 | 87726002 C             | 29 | 48 T  | 0.0005332  |
| rs148494630 | 13 | 87731770 ATAGCTCTTTCAG | 27 | 46 A  | 0.0005154  |
| rs34201290  | 13 | 87732266 A             | 28 | 46 AT | 0.0009321  |
| rs199991716 | 13 | 93547283 A             | 16 | 2 T   | 0.0008037  |
| rs9523882   | 13 | 93651756 G             | 23 | 5 A   | 0.0006807  |
| rs9524483   | 13 | 95069280 A             | 1  | 12 G  | 0.0007887  |
| rs7333025   | 13 | 95070898 T             | 1  | 12 C  | 0.0007887  |
| rs9524484   | 13 | 95072900 T             | 1  | 12 C  | 0.0007887  |
| rs9524485   | 13 | 95072976 T             | 1  | 12 C  | 0.0007887  |
| rs149410208 | 13 | 95074442 TA            | 0  | 12 T  | 0.00008299 |
| rs72636617  | 13 | 95075219 A             | 1  | 12 G  | 0.0007887  |
| rs4145275   | 13 | 104352252 A            | 28 | 8 G   | 0.0006092  |
| rs61347079  | 13 | 104372780 G            | 37 | 12 GT | 0.0001447  |
| rs75172355  | 13 | 104372787 C            | 36 | 12 T  | 0.0002646  |
| rs149175792 | 13 | 113890060 G            | 0  | 9 A   | 0.0009641  |
| rs8013531   | 14 | 23247687 T             | 26 | 44 C  | 0.0008911  |
| rs3742491   | 14 | 24429249 A             | 18 | 3 G   | 0.0009486  |
| rs139045649 | 14 | 24432493 C             | 19 | 3 G   | 0.0005045  |
| rs138982419 | 14 | 24435308 A             | 21 | 4 C   | 0.0008104  |
| rs141694248 | 14 | 24436047 T             | 18 | 3 C   | 0.0009486  |

|             |    |                        |    |         |            |
|-------------|----|------------------------|----|---------|------------|
| rs184829013 | 14 | 24476128 G             | 22 | 2 A     | 0.00003198 |
| rs151035018 | 14 | 24477842 T             | 22 | 4 C     | 0.00043    |
| rs7142198   | 14 | 24945331 G             | 31 | 10 A    | 0.0006062  |
| rs72679358  | 14 | 24960835 C             | 31 | 10 G    | 0.0006062  |
| rs6573990   | 14 | 25212506 T             | 19 | 38 G    | 0.0005156  |
| rs1461650   | 14 | 25213422 T             | 19 | 38 G    | 0.0005156  |
| 14:29935423 | 14 | 29935423 AAATATATAAATA | 0  | 10 A    | 0.0004869  |
| 14:38510836 | 14 | 38510836 T             | 12 | 0 C     | 0.0004098  |
| rs2415840   | 14 | 44650338 C             | 31 | 10 T    | 0.0006062  |
| rs112448176 | 14 | 44667587 ATG           | 20 | 3 A     | 0.000269   |
| rs61563993  | 14 | 44855154 A             | 16 | 2 G     | 0.0008956  |
| rs12433092  | 14 | 44862795 A             | 16 | 2 G     | 0.0008956  |
| rs10148461  | 14 | 44866697 A             | 16 | 2 G     | 0.0008956  |
| rs75760252  | 14 | 44875805 T             | 16 | 2 C     | 0.0008956  |
| rs11570840  | 14 | 50807624 T             | 29 | 9 C     | 0.0008145  |
| rs113252015 | 14 | 50808188 C             | 39 | 11 G    | 0.00001931 |
| rs11570836  | 14 | 50808965 C             | 29 | 9 A     | 0.0008145  |
| rs11570825  | 14 | 50812183 C             | 29 | 9 G     | 0.0008145  |
| rs1890979   | 14 | 50812791 T             | 29 | 9 C     | 0.0008145  |
| rs200323076 | 14 | 50813375 TTG           | 29 | 8 T     | 0.000328   |
| rs72683953  | 14 | 50815259 C             | 29 | 9 G     | 0.0008145  |
| rs11570819  | 14 | 50824413 T             | 29 | 9 C     | 0.0008145  |
| rs61981900  | 14 | 50835699 G             | 29 | 9 C     | 0.0008145  |
| rs56149746  | 14 | 50835834 T             | 29 | 9 C     | 0.0008145  |
| rs4901023   | 14 | 50837066 A             | 29 | 9 C     | 0.0008145  |
| rs56381880  | 14 | 50838885 A             | 29 | 9 G     | 0.0008145  |
| rs61981904  | 14 | 50840007 A             | 29 | 9 G     | 0.0008145  |
| rs58086072  | 14 | 50840712 C             | 29 | 9 T     | 0.0008145  |
| rs61424487  | 14 | 50840794 T             | 29 | 9 C     | 0.0008145  |
| rs112724011 | 14 | 50854706 T             | 28 | 8 C     | 0.0006092  |
| rs9323244   | 14 | 53914318 C             | 43 | 19 T    | 0.000761   |
| 14:61724348 | 14 | 61724348 CA            | 1  | 16 C    | 0.00003625 |
| rs2022663   | 14 | 62832374 C             | 24 | 42 G    | 0.0008352  |
| rs8013550   | 14 | 62836092 G             | 43 | 19 T    | 0.000761   |
| rs12434562  | 14 | 69318352 T             | 18 | 3 C     | 0.0009486  |
| rs2104090   | 14 | 69323589 T             | 18 | 3 C     | 0.0009486  |
| rs4899384   | 14 | 71625956 T             | 30 | 48 A    | 0.0009571  |
| rs35518531  | 14 | 74029894 C             | 28 | 7 CTCTT | 0.0002393  |
| rs8020801   | 14 | 74030964 T             | 29 | 7 C     | 0.0001288  |
| rs7142798   | 14 | 74032326 A             | 28 | 8 G     | 0.0006092  |
| rs10138751  | 14 | 74038214 G             | 28 | 7 A     | 0.0002393  |

|             |    |                    |    |            |            |
|-------------|----|--------------------|----|------------|------------|
| rs10140438  | 14 | 74040562 T         | 28 | 7 C        | 0.0002393  |
| rs33994188  | 14 | 74040740 AT        | 28 | 8 A        | 0.0002984  |
| rs4044907   | 14 | 74047195 T         | 28 | 7 C        | 0.0002393  |
| rs4044908   | 14 | 74047219 C         | 28 | 7 T        | 0.0002393  |
| rs6574128   | 14 | 74051889 T         | 28 | 7 G        | 0.0002393  |
| rs2079536   | 14 | 74052930 A         | 28 | 7 T        | 0.0002393  |
| rs1859910   | 14 | 74054221 A         | 29 | 8 G        | 0.0003391  |
| rs8015976   | 14 | 74055115 G         | 28 | 7 A        | 0.0002393  |
| rs34329309  | 14 | 74068631 CT        | 31 | 50 C       | 0.0005409  |
| rs10141401  | 14 | 74074804 T         | 31 | 49 C       | 0.0009634  |
| rs10150828  | 14 | 74077485 T         | 29 | 48 C       | 0.0005332  |
| rs8008001   | 14 | 76583051 C         | 5  | 19 T       | 0.0008415  |
| 14:77319775 | 14 | 77319775 A         | 0  | 10 T       | 0.0004292  |
| 14:78492143 | 14 | 78492143 TGTGTGTGC | 17 | 35 T       | 0.0007327  |
| 14:83762300 | 14 | 83762300 T         | 16 | 2 C        | 0.0008956  |
| rs55968259  | 14 | 88653977 C         | 37 | 14 A       | 0.0006739  |
| 14:89482375 | 14 | 89482375 A         | 2  | 14 T       | 0.0009649  |
| rs71107540  | 14 | 90124316 A         | 39 | 16 AATTATT | 0.0009032  |
| rs10646499  | 14 | 90129322 C         | 51 | 24 CTG     | 0.0003012  |
| rs2632191   | 14 | 90132482 C         | 52 | 24 T       | 0.0001653  |
| rs2018763   | 14 | 90132951 A         | 39 | 15 G       | 0.0004501  |
| rs12587740  | 14 | 90135343 T         | 51 | 24 C       | 0.0003012  |
| rs4904595   | 14 | 90135472 C         | 38 | 14 G       | 0.0003829  |
| rs8006303   | 14 | 90137426 A         | 38 | 14 G       | 0.0003829  |
| rs998564    | 14 | 90139311 C         | 51 | 23 T       | 0.000156   |
| rs2896113   | 14 | 90139991 C         | 51 | 23 T       | 0.000156   |
| rs1967774   | 14 | 90142951 A         | 29 | 53 G       | 0.00004072 |
| rs732914    | 14 | 90148522 A         | 52 | 23 G       | 0.00008358 |
| rs8019799   | 14 | 90148832 A         | 36 | 12 G       | 0.0002646  |
| rs7158240   | 14 | 90150146 G         | 40 | 14 A       | 0.0001172  |
| rs61998683  | 14 | 90150796 C         | 37 | 12 T       | 0.0001447  |
| rs2069963   | 14 | 95052627 T         | 14 | 31 C       | 0.0008795  |
| rs56348431  | 14 | 95174005 A         | 16 | 2 C        | 0.0008956  |
| rs1892224   | 14 | 98763349 T         | 53 | 26 C       | 0.0003309  |
| rs10138335  | 14 | 98772136 C         | 53 | 26 T       | 0.0003309  |
| rs1807069   | 14 | 98773458 G         | 53 | 27 A       | 0.0006109  |
| rs60500823  | 14 | 98794793 T         | 50 | 25 C       | 0.0009811  |
| rs34173953  | 14 | 98797235 G         | 50 | 25 GA      | 0.0009811  |
| rs4365229   | 14 | 98806562 T         | 53 | 26 C       | 0.0003309  |
| rs7145018   | 14 | 104626493 C        | 10 | 27 T       | 0.0006386  |
| rs12882239  | 14 | 104626811 C        | 7  | 23 G       | 0.0004919  |

|              |    |                         |    |                  |            |
|--------------|----|-------------------------|----|------------------|------------|
| rs141671546  | 14 | 104631874 GTC           | 15 | 39 G             | 0.00001206 |
| rs148671298  | 14 | 104631988 ATG           | 6  | 23 A             | 0.0001763  |
| 14:106587352 | 14 | 106587352 A             | 16 | 1 AT             | 0.0001772  |
| 14:106784161 | 14 | 106784161 T             | 20 | 3 C              | 0.000269   |
| 15:21181978  | 15 | 21181978 G              | 0  | 10 C             | 0.0004292  |
| rs61999421   | 15 | 23158339 C              | 19 | 37 G             | 0.0009069  |
| rs17114595   | 15 | 24929290 C              | 8  | 25 T             | 0.0003633  |
| rs201751200  | 15 | 30384836 G              | 16 | 2 A              | 0.0008912  |
| 15:32679629  | 15 | 32679629 G              | 5  | 20 A             | 0.0007845  |
| rs1258795    | 15 | 33107305 A              | 23 | 41 G             | 0.0008021  |
| rs146351760  | 15 | 34278834 G              | 5  | 19 GACCATAAGGCTC | 0.0008415  |
| rs200623438  | 15 | 34278848 G              | 5  | 19 A             | 0.0008415  |
| rs34976114   | 15 | 34278958 A              | 5  | 19 AGC           | 0.0008415  |
| 15:35070132  | 15 | 35070132 TTATTATTATTATT | 2  | 15 T             | 0.0004989  |
| rs10744966   | 15 | 36027556 A              | 10 | 27 C             | 0.0006386  |
| rs57424653   | 15 | 36028766 TAAAACAGGGAT/  | 10 | 27 T             | 0.0006386  |
| rs2647684    | 15 | 36031999 C              | 10 | 27 T             | 0.0006386  |
| rs2647683    | 15 | 36032032 A              | 10 | 27 C             | 0.0006386  |
| rs201416309  | 15 | 37534336 AC             | 1  | 12 A             | 0.0007887  |
| rs28769958   | 15 | 37604602 A              | 32 | 50 G             | 0.0009655  |
| rs377524289  | 15 | 37695564 C              | 0  | 9 A              | 0.0009641  |
| rs28807491   | 15 | 37697517 A              | 29 | 9 G              | 0.0008145  |
| rs377390681  | 15 | 37721779 A              | 0  | 9 G              | 0.0009641  |
| rs28464240   | 15 | 37940361 G              | 17 | 2 A              | 0.000467   |
| rs11073272   | 15 | 38137663 A              | 4  | 19 G             | 0.0004818  |
| rs17647739   | 15 | 38517147 G              | 0  | 10 A             | 0.0004292  |
| rs78688956   | 15 | 38673907 C              | 15 | 1 A              | 0.0003561  |
| rs1004496    | 15 | 38941557 C              | 30 | 48 A             | 0.0009571  |
| rs7173954    | 15 | 41275014 G              | 20 | 38 T             | 0.0009963  |
| rs78604303   | 15 | 41436999 A              | 3  | 16 G             | 0.0009912  |
| rs692390     | 15 | 41486990 A              | 5  | 19 G             | 0.0008415  |
| rs2445765    | 15 | 51634898 C              | 23 | 5 G              | 0.0006807  |
| rs113112680  | 15 | 51648220 C              | 14 | 1 T              | 0.0007094  |
| rs76564255   | 15 | 51998790 A              | 3  | 17 G             | 0.0005045  |
| rs76444462   | 15 | 52005282 T              | 3  | 16 C             | 0.0009912  |
| rs113030016  | 15 | 52060798 A              | 2  | 15 G             | 0.0005115  |
| rs201337109  | 15 | 52977626 G              | 0  | 11 GT            | 0.0002508  |
| rs201699031  | 15 | 52986366 TA             | 0  | 10 T             | 0.0004869  |
| rs8030746    | 15 | 57766915 C              | 13 | 30 A             | 0.0007578  |
| rs59776586   | 15 | 59843987 A              | 17 | 35 G             | 0.0007327  |
| rs144331371  | 15 | 59854321 A              | 16 | 32 G             | 0.000944   |

|             |    |             |    |               |            |
|-------------|----|-------------|----|---------------|------------|
| rs112689995 | 15 | 60139296 T  | 11 | 0 G           | 0.0007855  |
| rs77269568  | 15 | 60139337 A  | 11 | 0 G           | 0.0007855  |
| rs725463    | 15 | 60143079 T  | 31 | 51 C          | 0.0002959  |
| rs60731795  | 15 | 60152549 G  | 18 | 1 A           | 0.00004271 |
| rs77682314  | 15 | 60155552 T  | 18 | 1 G           | 0.00004271 |
| rs2970397   | 15 | 60173234 T  | 50 | 25 C          | 0.0009811  |
| rs2960809   | 15 | 60173272 G  | 51 | 25 A          | 0.0005636  |
| rs56278535  | 15 | 60176111 T  | 50 | 22 C          | 0.0001461  |
| rs893276    | 15 | 60177158 A  | 50 | 25 G          | 0.0009811  |
| rs4774348   | 15 | 60178791 A  | 30 | 48 C          | 0.0009571  |
| rs56205983  | 15 | 60180167 T  | 30 | 48 C          | 0.0009571  |
| rs11853750  | 15 | 60191548 T  | 30 | 48 C          | 0.0009571  |
| rs4774349   | 15 | 60193706 T  | 29 | 47 C          | 0.0009467  |
| rs34355056  | 15 | 65703625 G  | 23 | 5 C           | 0.0006807  |
| rs623887    | 15 | 65710002 T  | 25 | 5 C           | 0.0001938  |
| 15:79014065 | 15 | 79014065 T  | 9  | 25 C          | 0.0008942  |
| rs10468216  | 15 | 83248039 T  | 14 | 1 C           | 0.0007094  |
| rs12441668  | 15 | 83249012 A  | 14 | 1 G           | 0.0007094  |
| rs72751665  | 15 | 83270419 C  | 14 | 1 T           | 0.0007094  |
| rs201806597 | 15 | 83280797 TA | 16 | 1 T           | 0.0001772  |
| rs199976048 | 15 | 86780174 G  | 23 | 44 GGGGGGGGGC | 0.0003434  |
| rs67074928  | 15 | 88106241 GA | 18 | 3 G           | 0.0009486  |
| rs78256185  | 15 | 94454328 G  | 18 | 3 C           | 0.0009486  |
| rs6496098   | 15 | 95846311 C  | 14 | 31 T          | 0.0008795  |
| rs8030710   | 15 | 95850069 G  | 10 | 27 T          | 0.0006386  |
| rs1837920   | 15 | 96221632 G  | 2  | 14 C          | 0.0009649  |
| rs7167125   | 15 | 96224785 A  | 1  | 13 T          | 0.0003716  |
| rs12438895  | 15 | 96226126 A  | 2  | 14 G          | 0.0009649  |
| rs72764079  | 15 | 96230394 G  | 1  | 13 A          | 0.0003716  |
| rs200086610 | 15 | 96248963 G  | 1  | 13 GCA        | 0.0003716  |
| rs201009337 | 15 | 96248966 TG | 1  | 13 T          | 0.0003716  |
| rs2012110   | 15 | 96250179 G  | 1  | 13 A          | 0.0003716  |
| rs78317776  | 15 | 97681623 T  | 0  | 9 C           | 0.0009641  |
| rs72754651  | 15 | 98491336 T  | 15 | 1 C           | 0.0003561  |
| rs4966014   | 15 | 99248018 C  | 14 | 33 T          | 0.0002703  |
| rs116991589 | 15 | 99411911 T  | 0  | 9 C           | 0.0009641  |
| rs59399015  | 15 | 100320088 G | 5  | 19 A          | 0.0008415  |
| rs12899846  | 15 | 100324311 T | 5  | 19 C          | 0.0008415  |
| rs79654877  | 15 | 100325738 T | 5  | 19 C          | 0.0008415  |
| rs75977845  | 15 | 100330335 G | 5  | 19 GTATTT     | 0.0008415  |
| rs9920179   | 15 | 100334206 A | 5  | 19 C          | 0.0008415  |

|              |    |              |    |              |            |
|--------------|----|--------------|----|--------------|------------|
| rs9920699    | 15 | 100334668 C  | 5  | 19 T         | 0.0008415  |
| rs62040189   | 15 | 100334872 A  | 5  | 19 G         | 0.0008415  |
| rs79004777   | 15 | 100335128 T  | 5  | 19 TG        | 0.0008415  |
| rs71399877   | 15 | 100335286 C  | 5  | 19 T         | 0.0008415  |
| rs56401822   | 15 | 100335740 G  | 5  | 19 A         | 0.0008415  |
| rs56767751   | 15 | 100336365 C  | 5  | 24 CAAAAT    | 0.00002717 |
| rs2958996    | 15 | 100336397 A  | 5  | 24 G         | 0.00002717 |
| rs12916037   | 15 | 100340976 C  | 5  | 19 T         | 0.0008415  |
| rs12915962   | 15 | 100342213 A  | 5  | 19 G         | 0.0008415  |
| rs2958976    | 15 | 100342525 C  | 5  | 19 T         | 0.0008415  |
| rs2958975    | 15 | 100342635 C  | 5  | 19 T         | 0.0008415  |
| rs113107454  | 15 | 100342772 A  | 5  | 19 ATCATGGGC | 0.0008415  |
| rs199990996  | 15 | 100343037 A  | 5  | 19 ATAAAG    | 0.0008415  |
| rs71407353   | 15 | 100343060 T  | 5  | 19 C         | 0.0008415  |
| rs112377392  | 15 | 100343472 T  | 5  | 19 G         | 0.0008415  |
| rs74038119   | 15 | 100343487 G  | 5  | 19 T         | 0.0008415  |
| rs80273863   | 15 | 100343761 T  | 5  | 19 C         | 0.0008415  |
| rs62040219   | 15 | 100344543 G  | 5  | 19 T         | 0.0008415  |
| rs62040222   | 15 | 100345564 T  | 5  | 19 G         | 0.0008415  |
| 15:100351251 | 15 | 100351251 GT | 5  | 19 G         | 0.0008415  |
| rs35894461   | 15 | 100417009 G  | 3  | 16 GA        | 0.0009912  |
| rs28619387   | 15 | 100421261 C  | 7  | 23 A         | 0.0004919  |
| rs11856091   | 15 | 100421271 A  | 7  | 23 C         | 0.0004919  |
| rs11852933   | 15 | 100421490 G  | 7  | 23 A         | 0.0004919  |
| rs2727170    | 15 | 100421840 A  | 7  | 23 G         | 0.0004919  |
| rs28608162   | 15 | 100422080 C  | 7  | 23 A         | 0.0004919  |
| rs28647910   | 15 | 100422084 C  | 7  | 23 T         | 0.0004919  |
| 15:100422275 | 15 | 100422275 T  | 7  | 23 C         | 0.0004919  |
| 15:100422276 | 15 | 100422276 G  | 7  | 23 A         | 0.0004919  |
| rs201333708  | 15 | 100422360 G  | 7  | 23 GT        | 0.0004919  |
| rs8030437    | 15 | 100422411 T  | 7  | 23 A         | 0.0004919  |
| rs8035690    | 15 | 100422874 C  | 7  | 23 T         | 0.0004919  |
| rs10468176   | 15 | 100423144 T  | 7  | 23 C         | 0.0004919  |
| rs10468177   | 15 | 100423145 A  | 7  | 23 G         | 0.0004919  |
| rs28513757   | 16 | 866351 A     | 2  | 14 G         | 0.0009649  |
| rs2335858    | 16 | 2972033 A    | 11 | 0 C          | 0.0007855  |
| rs11865663   | 16 | 2972534 A    | 11 | 0 C          | 0.0007855  |
| rs59008953   | 16 | 2977283 G    | 12 | 0 C          | 0.0003752  |
| 16:6703978   | 16 | 6703978 G    | 0  | 10 A         | 0.0003596  |
| rs34484063   | 16 | 9230940 T    | 9  | 27 C         | 0.0002633  |
| rs12929306   | 16 | 9231253 T    | 9  | 29 C         | 0.00007225 |



|             |    |            |    |           |            |
|-------------|----|------------|----|-----------|------------|
| rs13339039  | 16 | 9231530 C  | 9  | 27 G      | 0.0002633  |
| rs13339041  | 16 | 9231534 T  | 9  | 27 G      | 0.0002633  |
| rs72778454  | 16 | 9617285 A  | 7  | 22 G      | 0.0009169  |
| rs12919665  | 16 | 9707265 C  | 19 | 37 T      | 0.0009069  |
| rs718396    | 16 | 9708268 G  | 19 | 37 A      | 0.0009069  |
| rs12927792  | 16 | 9713194 T  | 30 | 49 C      | 0.0005383  |
| 16:19552980 | 16 | 19552980 A | 21 | 4 G       | 0.0008104  |
| rs26765     | 16 | 23700266 C | 27 | 8 A       | 0.0009854  |
| rs368108    | 16 | 24252155 A | 41 | 17 G      | 0.0005984  |
| rs17815868  | 16 | 24283930 T | 31 | 10 A      | 0.0006062  |
| rs11645882  | 16 | 24284136 T | 31 | 10 C      | 0.0006062  |
| rs2238501   | 16 | 24285989 A | 31 | 10 G      | 0.0006062  |
| rs11640324  | 16 | 24287656 A | 31 | 10 G      | 0.0006062  |
| rs11646923  | 16 | 24287692 G | 31 | 10 A      | 0.0006062  |
| rs2238503   | 16 | 24288739 G | 31 | 10 C      | 0.0006062  |
| rs2238505   | 16 | 24296183 A | 31 | 10 G      | 0.0006062  |
| rs2238506   | 16 | 24297983 T | 31 | 10 C      | 0.0006062  |
| rs62029005  | 16 | 24299671 A | 31 | 10 T      | 0.0006062  |
| rs72781836  | 16 | 24300287 A | 31 | 10 G      | 0.0006062  |
| rs62029006  | 16 | 24301475 A | 31 | 10 G      | 0.0006062  |
| rs17759710  | 16 | 24301701 T | 31 | 10 C      | 0.0006062  |
| rs62029007  | 16 | 24301731 T | 31 | 10 C      | 0.0006062  |
| rs12598137  | 16 | 24301897 C | 31 | 10 T      | 0.0006062  |
| rs11640935  | 16 | 24303574 T | 31 | 10 C      | 0.0006062  |
| rs62029010  | 16 | 24305430 A | 31 | 10 G      | 0.0006062  |
| rs62029013  | 16 | 24308704 A | 31 | 9 G       | 0.0002572  |
| rs111818845 | 16 | 26814625 G | 12 | 0 A       | 0.0004541  |
| 16:32600808 | 16 | 32600808 A | 6  | 21 T      | 0.0005959  |
| rs199804107 | 16 | 33550174 C | 2  | 14 T      | 0.0009649  |
| 16:35252531 | 16 | 35252531 C | 1  | 13 T      | 0.0003716  |
| 16:35252542 | 16 | 35252542 G | 1  | 13 A      | 0.0003716  |
| rs374642173 | 16 | 35252546 T | 1  | 13 G      | 0.0003716  |
| 16:35252549 | 16 | 35252549 C | 1  | 13 G      | 0.0003716  |
| 16:35252556 | 16 | 35252556 G | 1  | 13 A      | 0.0003716  |
| rs12935596  | 16 | 48841681 T | 7  | 22 C      | 0.0009169  |
| 16:52901303 | 16 | 52901303 G | 0  | 10 A      | 0.0004292  |
| rs202037976 | 16 | 56161190 G | 20 | 40 A      | 0.0003188  |
| rs9921494   | 16 | 72873537 A | 3  | 16 C      | 0.0009912  |
| rs200106830 | 16 | 72901631 A | 4  | 17 AAAAAG | 0.0008872  |
| 16:73093273 | 16 | 73093273 G | 15 | 0 A       | 0.00003523 |
| rs2735407   | 16 | 78049430 C | 25 | 45 G      | 0.0002688  |

|             |    |            |    |       |           |
|-------------|----|------------|----|-------|-----------|
| rs2707610   | 16 | 78049465 T | 25 | 45 C  | 0.0002688 |
| rs7192716   | 16 | 78049521 T | 25 | 45 A  | 0.0002688 |
| rs2707608   | 16 | 78050219 T | 25 | 43 C  | 0.0008649 |
| rs2072665   | 16 | 78065488 C | 41 | 17 T  | 0.0005984 |
| rs7188702   | 16 | 78065673 T | 41 | 17 A  | 0.0005984 |
| rs11859824  | 16 | 78660716 A | 8  | 24 G  | 0.0006758 |
| rs529223    | 16 | 83874823 A | 29 | 9 C   | 0.0008145 |
| rs3935715   | 16 | 85199237 A | 18 | 3 T   | 0.0009486 |
| rs143574208 | 16 | 85509419 C | 1  | 12 CG | 0.0007887 |
| rs9933468   | 16 | 85572662 G | 39 | 16 C  | 0.0009032 |
| rs3934891   | 16 | 85573772 T | 39 | 16 A  | 0.0009032 |
| rs4072360   | 16 | 85574528 A | 39 | 16 T  | 0.0009032 |
| rs9932681   | 16 | 85575053 C | 39 | 16 T  | 0.0009032 |
| rs78429171  | 16 | 85575718 G | 39 | 16 GT | 0.0009032 |
| 16:86299406 | 16 | 86299406 A | 0  | 11 C  | 0.0001895 |
| rs1687632   | 16 | 86375805 C | 2  | 14 G  | 0.0009649 |
| rs1687631   | 16 | 86375941 A | 2  | 14 G  | 0.0009649 |
| rs1728419   | 16 | 86376876 T | 2  | 14 A  | 0.0009649 |
| rs3103628   | 16 | 86377793 A | 2  | 14 G  | 0.0009649 |
| rs3103629   | 16 | 86377799 A | 2  | 14 T  | 0.0009649 |
| rs1918824   | 16 | 86378264 G | 2  | 14 C  | 0.0009649 |
| rs1918822   | 16 | 86378369 A | 2  | 14 T  | 0.0009649 |
| rs1728377   | 16 | 86378844 T | 2  | 14 C  | 0.0009649 |
| rs1728375   | 16 | 86379460 A | 2  | 14 G  | 0.0009649 |
| rs1728374   | 16 | 86379467 A | 2  | 14 G  | 0.0009649 |
| rs1619229   | 16 | 86379556 A | 2  | 14 G  | 0.0009649 |
| rs1687629   | 16 | 86380283 G | 2  | 14 A  | 0.0009649 |
| rs1687628   | 16 | 86380293 T | 2  | 14 C  | 0.0009649 |
| rs1728373   | 16 | 86380294 G | 2  | 14 A  | 0.0009649 |
| rs1687627   | 16 | 86380421 A | 2  | 14 G  | 0.0009649 |
| rs8058345   | 16 | 86380906 A | 2  | 14 G  | 0.0009649 |
| rs6540288   | 16 | 86380943 T | 2  | 14 A  | 0.0009649 |
| rs2451862   | 16 | 86380964 C | 2  | 14 A  | 0.0009649 |
| rs2451861   | 16 | 86381006 C | 2  | 14 G  | 0.0009649 |
| rs2463604   | 16 | 86381016 C | 2  | 14 T  | 0.0009649 |
| rs2463603   | 16 | 86381023 A | 2  | 14 G  | 0.0009649 |
| rs7403918   | 16 | 86828794 G | 14 | 32 A  | 0.0004925 |
| rs9940109   | 16 | 87266245 A | 19 | 37 C  | 0.0009069 |
| 16:87304715 | 16 | 87304715 T | 9  | 28 C  | 0.0001391 |
| rs113591197 | 16 | 89108636 A | 0  | 10 G  | 0.0004292 |
| rs8058269   | 16 | 89110920 C | 0  | 10 T  | 0.0004292 |

|             |    |                        |    |           |           |
|-------------|----|------------------------|----|-----------|-----------|
| rs74034553  | 16 | 89114993 G             | 0  | 10 T      | 0.0004292 |
| rs9806827   | 16 | 89115688 C             | 0  | 10 A      | 0.0004292 |
| rs74034555  | 16 | 89116047 A             | 0  | 10 G      | 0.0004292 |
| rs61596186  | 16 | 89116584 T             | 0  | 10 C      | 0.0004292 |
| rs111390307 | 16 | 89116980 C             | 0  | 10 T      | 0.0004292 |
| rs112273493 | 16 | 89117342 G             | 0  | 10 C      | 0.0004292 |
| rs74034558  | 16 | 89118492 T             | 0  | 10 C      | 0.0004292 |
| rs74034563  | 16 | 89122432 A             | 0  | 10 G      | 0.0004292 |
| rs149078245 | 16 | 89123179 T             | 0  | 10 TG     | 0.0004292 |
| rs74034564  | 16 | 89123539 T             | 0  | 10 C      | 0.0004292 |
| rs74719380  | 16 | 89125848 A             | 0  | 10 G      | 0.0004292 |
| rs188435427 | 16 | 89126381 A             | 0  | 10 G      | 0.0004292 |
| rs117769809 | 16 | 89129569 T             | 0  | 10 C      | 0.0004292 |
| rs112693041 | 16 | 89130022 T             | 0  | 10 C      | 0.0004292 |
| rs117098882 | 16 | 89132011 C             | 0  | 10 T      | 0.0004292 |
| rs75167441  | 16 | 89378653 T             | 15 | 1 C       | 0.0003561 |
| rs10454069  | 16 | 89380666 G             | 1  | 13 C      | 0.0003716 |
| rs35359504  | 17 | 989967 G               | 49 | 23 C      | 0.0005083 |
| 17:2789470  | 17 | 2789470 A              | 0  | 9 T       | 0.0008435 |
| rs17727437  | 17 | 5936617 C              | 0  | 11 T      | 0.0001895 |
| rs117076215 | 17 | 6300167 T              | 16 | 2 C       | 0.0008956 |
| rs115074709 | 17 | 6312274 T              | 16 | 2 C       | 0.0008956 |
| rs4581751   | 17 | 6312668 T              | 22 | 4 C       | 0.00043   |
| 17:6818065  | 17 | 6818065 A              | 1  | 14 C      | 0.0001881 |
| rs117819652 | 17 | 9346012 G              | 0  | 9 A       | 0.0009641 |
| 17:10053738 | 17 | 10053738 T             | 0  | 14 C      | 0.0001855 |
| rs11078044  | 17 | 11808491 T             | 5  | 19 C      | 0.000809  |
| rs62061375  | 17 | 14899443 T             | 15 | 35 C      | 0.0001708 |
| rs11653343  | 17 | 14910499 C             | 9  | 25 T      | 0.0008942 |
| rs4539645   | 17 | 14923255 A             | 20 | 38 G      | 0.0009963 |
| rs142548624 | 17 | 14924062 A             | 19 | 37 ATAAAT | 0.0009069 |
| rs79908869  | 17 | 15275001 C             | 1  | 12 T      | 0.0007887 |
| 17:16677443 | 17 | 16677443 G             | 16 | 2 T       | 0.0008956 |
| rs112992326 | 17 | 18223822 C             | 1  | 13 G      | 0.0003716 |
| 17:18291344 | 17 | 18291344 ATATATATATATA | 24 | 6 A       | 0.0009794 |
| rs4452012   | 17 | 18562691 G             | 53 | 26 C      | 0.0003309 |
| rs4441330   | 17 | 18562720 C             | 54 | 27 T      | 0.0003437 |
| rs369619837 | 17 | 19571912 G             | 26 | 7 A       | 0.0007902 |
| rs76119305  | 17 | 19605569 C             | 2  | 14 T      | 0.0009649 |
| rs157386    | 17 | 19699121 A             | 26 | 6 G       | 0.0003002 |
| 17:19729309 | 17 | 19729309 AT            | 36 | 13 A      | 0.0001386 |

|             |    |               |    |           |            |
|-------------|----|---------------|----|-----------|------------|
| rs60573446  | 17 | 19729312 AT   | 36 | 13 A      | 0.0001217  |
| rs407990    | 17 | 19736262 G    | 34 | 10 C      | 0.0001698  |
| rs281357    | 17 | 19742514 T    | 35 | 13 C      | 0.000996   |
| rs200473841 | 17 | 21560878 C    | 11 | 0 T       | 0.0007855  |
| rs34067029  | 17 | 29871409 G    | 55 | 28 A      | 0.0005409  |
| rs1109956   | 17 | 35216997 T    | 17 | 35 C      | 0.000674   |
| rs60117359  | 17 | 43060051 G    | 23 | 5 T       | 0.0006807  |
| rs4793944   | 17 | 46667304 T    | 48 | 22 C      | 0.0004783  |
| rs10597590  | 17 | 46746068 TCTC | 15 | 33 T      | 0.0005689  |
| rs34002327  | 17 | 46763580 A    | 6  | 22 G      | 0.000342   |
| rs112734318 | 17 | 46764463 A    | 45 | 19 G      | 0.0004142  |
| rs188869607 | 17 | 46764522 T    | 54 | 22 A      | 0.00003472 |
| rs10445381  | 17 | 46766306 G    | 54 | 23 A      | 0.00002242 |
| rs12941331  | 17 | 46769069 T    | 6  | 22 C      | 0.000342   |
| rs8067554   | 17 | 46769270 T    | 6  | 22 A      | 0.000342   |
| rs3096643   | 17 | 46769448 T    | 53 | 23 G      | 0.00004378 |
| rs4793971   | 17 | 46770113 T    | 6  | 22 C      | 0.000342   |
| rs8182366   | 17 | 46771366 A    | 48 | 21 T      | 0.0002205  |
| rs10528381  | 17 | 46772982 C    | 51 | 21 CCTTTT | 0.00003225 |
| rs61102347  | 17 | 46774809 C    | 27 | 47 A      | 0.0002837  |
| rs4793972   | 17 | 46775005 C    | 7  | 22 T      | 0.0009169  |
| rs112609688 | 17 | 46775760 C    | 53 | 23 T      | 0.00004378 |
| rs4581744   | 17 | 46776341 A    | 27 | 50 G      | 0.00004066 |
| rs113038184 | 17 | 46777791 T    | 51 | 24 A      | 0.0003012  |
| rs62065362  | 17 | 46778079 T    | 51 | 22 G      | 0.00007816 |
| rs4793973   | 17 | 46780151 A    | 5  | 20 G      | 0.0004383  |
| rs4793974   | 17 | 46780300 C    | 12 | 30 T      | 0.0005652  |
| rs9897429   | 17 | 47518378 G    | 27 | 46 A      | 0.0005154  |
| rs57112168  | 17 | 47994255 A    | 17 | 35 C      | 0.0007327  |
| rs56011844  | 17 | 47994267 G    | 17 | 35 C      | 0.0007327  |
| rs8066067   | 17 | 49407790 C    | 13 | 0 A       | 0.0001783  |
| rs8068355   | 17 | 49435579 C    | 46 | 21 T      | 0.0007859  |
| rs9807015   | 17 | 49435657 C    | 46 | 21 T      | 0.0007859  |
| rs7208147   | 17 | 49437720 G    | 46 | 21 C      | 0.0007859  |
| rs4794236   | 17 | 49438873 G    | 46 | 21 A      | 0.0007859  |
| rs4794238   | 17 | 49439280 T    | 46 | 21 C      | 0.0007859  |
| rs758520    | 17 | 49441127 A    | 46 | 21 C      | 0.0007859  |
| rs2013281   | 17 | 49441641 T    | 46 | 21 A      | 0.0007859  |
| rs9903614   | 17 | 49442178 G    | 46 | 21 T      | 0.0007859  |
| rs758521    | 17 | 49442332 C    | 46 | 21 T      | 0.0007859  |
| rs736757    | 17 | 49442630 A    | 46 | 21 G      | 0.0007859  |

|             |    |                |    |            |            |
|-------------|----|----------------|----|------------|------------|
| rs736758    | 17 | 49442821 T     | 46 | 21 C       | 0.0007859  |
| rs4794241   | 17 | 49445074 G     | 45 | 21 A       | 0.0007429  |
| rs4794242   | 17 | 49447214 G     | 46 | 21 A       | 0.0007859  |
| rs140520931 | 17 | 49480129 CT    | 5  | 19 C       | 0.0008415  |
| rs11652255  | 17 | 55468446 A     | 16 | 2 G        | 0.0008956  |
| rs72833004  | 17 | 55486740 A     | 25 | 6 G        | 0.0005533  |
| rs62058122  | 17 | 55692602 T     | 1  | 12 C       | 0.0007887  |
| rs201550481 | 17 | 67961542 T     | 18 | 3 C        | 0.0009486  |
| rs199538105 | 17 | 74948103 AG    | 49 | 20 A       | 0.0002086  |
| rs75280128  | 17 | 75726185 T     | 11 | 0 A        | 0.0007855  |
| rs4789007   | 17 | 75849501 T     | 14 | 1 C        | 0.0007094  |
| rs139586625 | 17 | 75916547 C     | 16 | 1 T        | 0.0001772  |
| rs79095850  | 17 | 75922079 T     | 15 | 1 C        | 0.0003561  |
| rs60249275  | 17 | 76024170 G     | 47 | 22 A       | 0.0008379  |
| rs12103535  | 17 | 76500652 T     | 46 | 21 C       | 0.0007859  |
| rs72849844  | 17 | 78273610 T     | 14 | 0 C        | 0.00008428 |
| rs117459315 | 17 | 78273990 T     | 14 | 0 C        | 0.00008428 |
| rs72849848  | 17 | 78275156 G     | 14 | 0 A        | 0.00008428 |
| rs72849850  | 17 | 78278663 T     | 14 | 0 C        | 0.00008428 |
| rs112599480 | 17 | 78279689 A     | 14 | 0 G        | 0.00008428 |
| rs66578743  | 18 | 10679 C        | 14 | 29 A       | 0.0005934  |
| rs12957723  | 18 | 325884 A       | 2  | 16 G       | 0.0002312  |
| rs143366568 | 18 | 2490684 A      | 37 | 14 AAAAAAT | 0.0006739  |
| rs2644197   | 18 | 2492423 G      | 53 | 20 A       | 0.00000429 |
| rs16943352  | 18 | 2495530 A      | 12 | 32 G       | 0.0001005  |
| rs12457488  | 18 | 2496329 T      | 12 | 32 G       | 0.0001005  |
| rs17533695  | 18 | 2496404 C      | 42 | 16 T       | 0.0001653  |
| rs770226    | 18 | 2497437 C      | 42 | 16 T       | 0.0001653  |
| rs770227    | 18 | 2497443 C      | 12 | 32 T       | 0.0001005  |
| rs12458240  | 18 | 2497517 A      | 12 | 32 G       | 0.0001005  |
| rs5822707   | 18 | 2497914 CCACTT | 12 | 32 C       | 0.0001005  |
| rs12454088  | 18 | 2498581 G      | 12 | 32 C       | 0.0001005  |
| rs12458998  | 18 | 2498726 A      | 12 | 32 G       | 0.0001005  |
| rs9955413   | 18 | 3099402 C      | 25 | 43 T       | 0.0008649  |
| rs7232329   | 18 | 3100429 A      | 25 | 43 G       | 0.0008649  |
| rs11081005  | 18 | 3101470 T      | 25 | 43 C       | 0.0008649  |
| rs9953889   | 18 | 4087117 C      | 31 | 48 T       | 0.0008872  |
| rs1658169   | 18 | 4491413 G      | 13 | 31 A       | 0.0004205  |
| rs190474398 | 18 | 5499832 G      | 22 | 4 A        | 0.0004962  |
| rs9945119   | 18 | 10035436 T     | 42 | 18 C       | 0.0006782  |
| rs625395    | 18 | 10036145 T     | 43 | 18 C       | 0.0003905  |

|             |    |                       |    |                  |            |
|-------------|----|-----------------------|----|------------------|------------|
| rs613223    | 18 | 10036551 C            | 43 | 18 T             | 0.0003905  |
| rs518096    | 18 | 10037213 T            | 43 | 18 C             | 0.0003905  |
| rs517854    | 18 | 10037294 C            | 43 | 18 T             | 0.0003905  |
| rs487857    | 18 | 10038210 A            | 42 | 18 G             | 0.0006782  |
| rs569812    | 18 | 10039025 G            | 43 | 18 C             | 0.0003905  |
| rs568855    | 18 | 10039133 G            | 43 | 18 C             | 0.0003905  |
| rs67716474  | 18 | 10039259 TG           | 43 | 18 T             | 0.0003905  |
| rs1292308   | 18 | 10039331 G            | 42 | 18 A             | 0.0006782  |
| rs565991    | 18 | 10039453 A            | 43 | 18 G             | 0.0003905  |
| rs539466    | 18 | 10040066 G            | 42 | 18 A             | 0.0006782  |
| rs535823    | 18 | 10040445 A            | 43 | 18 G             | 0.0003905  |
| rs541164    | 18 | 10041354 G            | 43 | 18 C             | 0.0003905  |
| rs541853    | 18 | 10041374 T            | 42 | 18 C             | 0.0006782  |
| rs644778    | 18 | 10042023 C            | 43 | 18 T             | 0.0003905  |
| rs572197    | 18 | 10042399 A            | 43 | 18 G             | 0.0003905  |
| rs631448    | 18 | 10042744 T            | 42 | 18 A             | 0.0006782  |
| rs106763    | 18 | 10043959 T            | 42 | 18 C             | 0.0006782  |
| rs1985509   | 18 | 10045562 C            | 52 | 23 T             | 0.00008358 |
| rs663130    | 18 | 10046837 C            | 52 | 23 T             | 0.00008358 |
| rs647866    | 18 | 10047937 G            | 50 | 23 A             | 0.0002847  |
| rs529225    | 18 | 10049909 C            | 50 | 24 G             | 0.0005368  |
| rs1787086   | 18 | 35309697 G            | 30 | 10 T             | 0.0005063  |
| 18:35309700 | 18 | 35309700 CGATCTGTCTAT | 37 | 13 C             | 0.0003209  |
| rs72898715  | 18 | 35919503 C            | 14 | 1 T              | 0.0007094  |
| rs11877700  | 18 | 37842775 C            | 12 | 0 T              | 0.0003752  |
| rs9949334   | 18 | 37844766 C            | 12 | 0 T              | 0.0003752  |
| rs9945673   | 18 | 37850426 G            | 12 | 0 A              | 0.0003752  |
| rs35670038  | 18 | 37853117 GA           | 11 | 0 G              | 0.0007855  |
| rs72904819  | 18 | 37942560 A            | 11 | 29 G             | 0.0004498  |
| rs7240539   | 18 | 37951056 T            | 14 | 32 C             | 0.0004925  |
| rs11662516  | 18 | 37952153 T            | 11 | 29 C             | 0.0004498  |
| rs11659339  | 18 | 37958898 C            | 11 | 29 T             | 0.0004498  |
| rs72904871  | 18 | 37959980 T            | 11 | 29 G             | 0.0004498  |
| rs72904878  | 18 | 37961767 A            | 11 | 29 G             | 0.0004498  |
| rs56058513  | 18 | 37968788 G            | 11 | 29 A             | 0.0004498  |
| rs72890039  | 18 | 37973929 T            | 11 | 29 C             | 0.0004498  |
| rs203156    | 18 | 38044314 T            | 30 | 48 A             | 0.0009571  |
| rs203191    | 18 | 38054299 A            | 30 | 49 G             | 0.0005383  |
| rs169395    | 18 | 38054353 G            | 30 | 49 T             | 0.0005383  |
| rs61083958  | 18 | 38055471 A            | 30 | 48 AAGAATGTGATTC | 0.0009571  |
| rs55562     | 18 | 38057808 T            | 28 | 48 C             | 0.0004211  |

|             |    |             |    |             |            |
|-------------|----|-------------|----|-------------|------------|
| rs61371567  | 18 | 38058683 AT | 30 | 49 A        | 0.0005383  |
| rs203162    | 18 | 38059386 C  | 30 | 49 T        | 0.0005383  |
| rs203172    | 18 | 38068321 T  | 30 | 49 C        | 0.0005383  |
| rs4132081   | 18 | 38084525 C  | 30 | 50 T        | 0.0002951  |
| rs4291983   | 18 | 38106410 C  | 31 | 50 A        | 0.0005409  |
| rs9956350   | 18 | 38107168 G  | 31 | 50 A        | 0.0005409  |
| rs7227822   | 18 | 38107825 C  | 31 | 50 G        | 0.0005409  |
| rs58857930  | 18 | 38118024 GA | 6  | 21 G        | 0.0006518  |
| rs8091417   | 18 | 38124303 T  | 31 | 50 C        | 0.0005409  |
| rs112024034 | 18 | 39253947 G  | 7  | 25 GA       | 0.0001343  |
| rs10502774  | 18 | 39254020 C  | 2  | 14 A        | 0.0009649  |
| rs1865290   | 18 | 39255558 A  | 2  | 14 T        | 0.0009649  |
| rs1865289   | 18 | 39255600 C  | 2  | 14 T        | 0.0009649  |
| rs8092873   | 18 | 39256336 G  | 3  | 16 A        | 0.0009912  |
| rs8093033   | 18 | 39256431 G  | 7  | 25 A        | 0.0001343  |
| rs11082244  | 18 | 39257033 G  | 2  | 14 A        | 0.0009649  |
| rs1865288   | 18 | 39257639 T  | 3  | 17 C        | 0.0005045  |
| rs11873827  | 18 | 39261692 C  | 8  | 26 G        | 0.0001919  |
| rs1433931   | 18 | 39277952 A  | 4  | 18 G        | 0.0009242  |
| rs7234764   | 18 | 39280705 A  | 8  | 26 G        | 0.0001919  |
| rs9304252   | 18 | 39282873 A  | 2  | 16 T        | 0.0002312  |
| rs7240040   | 18 | 39283106 C  | 2  | 16 A        | 0.0002312  |
| rs1368835   | 18 | 39285384 G  | 2  | 15 A        | 0.0004755  |
| rs2314979   | 18 | 39287420 C  | 2  | 15 T        | 0.0004755  |
| rs11876458  | 18 | 39289536 G  | 8  | 25 A        | 0.0003633  |
| rs4890212   | 18 | 39290372 T  | 2  | 15 C        | 0.0004755  |
| rs200786741 | 18 | 39782725 G  | 22 | 4 GT        | 0.000223   |
| 18:40507336 | 18 | 40507336 T  | 20 | 45 TGTGTGTG | 0.00007324 |
| 18:48853562 | 18 | 48853562 A  | 18 | 3 T         | 0.0009486  |
| rs367904418 | 18 | 48853566 A  | 23 | 3 T         | 0.00006268 |
| rs9946188   | 18 | 62202275 T  | 27 | 45 G        | 0.0009136  |
| rs8085758   | 18 | 62202713 T  | 27 | 45 A        | 0.0009136  |
| rs377373310 | 18 | 62770130 T  | 12 | 0 A         | 0.0004093  |
| rs10871601  | 18 | 64364171 G  | 0  | 9 A         | 0.0008435  |
| 18:66093134 | 18 | 66093134 T  | 0  | 10 A        | 0.0004292  |
| 18:66093135 | 18 | 66093135 A  | 0  | 10 T        | 0.0004292  |
| rs60749094  | 18 | 73824642 G  | 51 | 22 C        | 0.00007816 |
| rs76470163  | 18 | 73824644 G  | 52 | 23 C        | 0.00008358 |
| rs62094675  | 18 | 73824646 G  | 53 | 24 C        | 0.00008869 |
| rs4890830   | 18 | 75257146 T  | 27 | 7 G         | 0.0004381  |
| rs544752    | 18 | 77535939 A  | 13 | 31 G        | 0.0004205  |

|             |    |                 |    |                   |           |
|-------------|----|-----------------|----|-------------------|-----------|
| rs12965930  | 18 | 77676057 T      | 11 | 0 C               | 0.0008455 |
| rs56357228  | 19 | 2540253 A       | 16 | 2 G               | 0.0008956 |
| rs71337146  | 19 | 2540372 T       | 16 | 2 TCTC            | 0.0008956 |
| rs12977761  | 19 | 2540449 C       | 16 | 2 T               | 0.0008956 |
| rs67768503  | 19 | 2542552 T       | 19 | 3 C               | 0.0005082 |
| rs35511982  | 19 | 2542652 T       | 19 | 3 C               | 0.0005082 |
| rs6510682   | 19 | 2545570 G       | 15 | 1 A               | 0.0003561 |
| rs75020370  | 19 | 3090719 T       | 11 | 28 C              | 0.0008103 |
| rs6510736   | 19 | 3165974 A       | 2  | 16 G              | 0.0002312 |
| rs112301049 | 19 | 4300958 AGTTTTT | 6  | 21 A              | 0.0006518 |
| 19:4885160  | 19 | 4885160 T       | 18 | 3 C               | 0.0009486 |
| rs10419597  | 19 | 7125915 A       | 3  | 16 G              | 0.0009912 |
| rs10408374  | 19 | 7127294 T       | 3  | 16 C              | 0.0009912 |
| rs8106714   | 19 | 7130686 A       | 3  | 16 G              | 0.0009912 |
| rs8111012   | 19 | 7130731 G       | 3  | 16 T              | 0.0009912 |
| rs71873129  | 19 | 7130785 C       | 3  | 16 CCT            | 0.0009912 |
| rs75930593  | 19 | 7131187 A       | 3  | 16 G              | 0.0009912 |
| rs11878560  | 19 | 7131323 C       | 3  | 16 T              | 0.0009912 |
| rs11883285  | 19 | 7131380 G       | 3  | 16 A              | 0.0009912 |
| rs2860175   | 19 | 7132081 T       | 3  | 16 C              | 0.0009912 |
| rs8112793   | 19 | 7288790 A       | 4  | 18 G              | 0.0009242 |
| rs1864009   | 19 | 7294931 A       | 7  | 23 C              | 0.0004919 |
| rs11880337  | 19 | 7296452 C       | 7  | 22 T              | 0.0009169 |
| rs7507911   | 19 | 7298095 T       | 7  | 22 C              | 0.0009169 |
| rs7250537   | 19 | 7298723 A       | 7  | 22 G              | 0.0009169 |
| rs41285780  | 19 | 7974865 A       | 0  | 10 G              | 0.0004292 |
| rs62117528  | 19 | 8486345 T       | 15 | 35 C              | 0.0002806 |
| rs7249094   | 19 | 8672000 A       | 23 | 43 G              | 0.0002487 |
| rs7253116   | 19 | 8672076 A       | 24 | 43 C              | 0.000471  |
| rs7248613   | 19 | 9138317 C       | 49 | 22 T              | 0.0002673 |
| rs11673664  | 19 | 9140304 G       | 47 | 22 A              | 0.0008379 |
| rs12720356  | 19 | 10469975 C      | 17 | 2 A               | 0.000467  |
| rs2569543   | 19 | 11236121 C      | 12 | 0 G               | 0.0004093 |
| rs2569538   | 19 | 11238548 A      | 12 | 0 G               | 0.0003752 |
| rs4804567   | 19 | 11245472 T      | 12 | 0 C               | 0.0003752 |
| rs7256793   | 19 | 11247081 T      | 12 | 0 C               | 0.0003752 |
| rs8105087   | 19 | 13250340 T      | 30 | 8 A               | 0.0001859 |
| 19:13327476 | 19 | 13327476 T      | 11 | 29 TC             | 0.0002293 |
| 19:13327478 | 19 | 13327478 T      | 11 | 29 TATCTATCTATCT# | 0.0002293 |
| rs34800714  | 19 | 17333532 C      | 14 | 1 CA              | 0.0008899 |
| rs140021996 | 19 | 20097971 A      | 0  | 9 T               | 0.0008243 |



|             |    |             |    |             |            |
|-------------|----|-------------|----|-------------|------------|
| 19:29281257 | 19 | 29281257 A  | 14 | 1 G         | 0.0006479  |
| rs74994260  | 19 | 33638586 G  | 0  | 11 C        | 0.0001895  |
| rs115215688 | 19 | 33639422 G  | 0  | 12 C        | 0.00008299 |
| rs2918333   | 19 | 36750539 A  | 0  | 11 G        | 0.0001895  |
| rs12985428  | 19 | 39414109 A  | 22 | 41 G        | 0.0004309  |
| rs57362195  | 19 | 39414613 C  | 23 | 41 CA       | 0.0008021  |
| rs77152874  | 19 | 40288189 T  | 19 | 3 C         | 0.0009229  |
| rs10411681  | 19 | 48243509 A  | 34 | 12 G        | 0.000839   |
| rs2011339   | 19 | 48245780 T  | 34 | 12 C        | 0.000839   |
| rs968579    | 19 | 48246401 G  | 34 | 12 C        | 0.000839   |
| rs3826832   | 19 | 48247639 G  | 34 | 12 A        | 0.000839   |
| rs11671367  | 19 | 48250714 G  | 35 | 12 T        | 0.0004754  |
| rs3745754   | 19 | 48253579 A  | 34 | 12 G        | 0.000839   |
| rs10402957  | 19 | 48254392 T  | 34 | 12 C        | 0.000839   |
| rs5828313   | 19 | 48256785 AC | 34 | 12 A        | 0.000839   |
| rs10422531  | 19 | 48256982 A  | 34 | 12 G        | 0.000839   |
| rs10406879  | 19 | 48258551 T  | 34 | 12 C        | 0.000839   |
| rs889142    | 19 | 48260079 T  | 34 | 12 C        | 0.000839   |
| rs34134057  | 19 | 48265657 G  | 38 | 15 T        | 0.0007851  |
| rs34934272  | 19 | 48265660 C  | 38 | 15 T        | 0.0007851  |
| rs34679717  | 19 | 48270613 TC | 34 | 12 T        | 0.000839   |
| rs10412990  | 19 | 48273401 T  | 34 | 12 C        | 0.000839   |
| rs1035449   | 19 | 48274041 T  | 34 | 12 C        | 0.000839   |
| rs10425789  | 19 | 48275098 G  | 34 | 12 C        | 0.000839   |
| rs10414783  | 19 | 48277208 G  | 34 | 12 C        | 0.000839   |
| rs10414443  | 19 | 48277301 A  | 34 | 12 G        | 0.000839   |
| rs11083897  | 19 | 48279789 G  | 34 | 12 A        | 0.000839   |
| rs11670990  | 19 | 48279901 C  | 34 | 12 T        | 0.000839   |
| rs2334297   | 19 | 48280932 C  | 34 | 12 G        | 0.000839   |
| rs2334298   | 19 | 48280978 G  | 34 | 12 A        | 0.000839   |
| rs3815751   | 19 | 48282316 G  | 34 | 12 A        | 0.000839   |
| rs200521388 | 19 | 48488329 A  | 0  | 10 AAAAAAAG | 0.0004778  |
| 19:48492369 | 19 | 48492369 T  | 2  | 20 TA       | 0.00001141 |
| 19:48492371 | 19 | 48492371 T  | 2  | 20 TTA      | 0.00001233 |
| rs7247872   | 19 | 52925727 G  | 7  | 22 A        | 0.0009169  |
| rs7247880   | 19 | 52925743 G  | 7  | 22 A        | 0.0009169  |
| rs4802933   | 19 | 52925820 A  | 7  | 22 G        | 0.0009169  |
| rs4802934   | 19 | 52925832 G  | 7  | 22 A        | 0.0009169  |
| rs369042987 | 19 | 53049033 G  | 6  | 20 GA       | 0.0005097  |
| rs78681110  | 19 | 54931444 A  | 26 | 7 G         | 0.0007902  |
| rs7259090   | 19 | 55392646 A  | 5  | 19 G        | 0.0008415  |

|             |    |                       |    |                 |             |
|-------------|----|-----------------------|----|-----------------|-------------|
| rs139784954 | 19 | 55412459 G            | 0  | 9 A             | 0.0009641   |
| 19:55608122 | 19 | 55608122 C            | 18 | 1 CCGCAGTTCACCA | 0.00004235  |
| 19:59013833 | 19 | 59013833 G            | 24 | 6 GAGTAGTGAGTG, | 0.0009794   |
| 20:530314   | 20 | 530314 GAAAGAAAT      | 0  | 9 G             | 0.0009641   |
| rs16986637  | 20 | 2515179 A             | 15 | 1 C             | 0.0003561   |
| rs6083577   | 20 | 2518238 G             | 15 | 1 C             | 0.0003561   |
| rs6114822   | 20 | 2520342 T             | 15 | 1 C             | 0.0003561   |
| rs6114849   | 20 | 2524120 G             | 15 | 1 A             | 0.0003561   |
| rs6083611   | 20 | 2528940 G             | 15 | 1 A             | 0.0003561   |
| rs78953454  | 20 | 3439535 G             | 4  | 18 C            | 0.0009242   |
| rs11087590  | 20 | 3594461 CTTTTTAAATGAC | 0  | 16 C            | 0.000003438 |
| rs35560557  | 20 | 4834894 A             | 18 | 3 G             | 0.0009486   |
| rs7260714   | 20 | 6918462 C             | 46 | 21 T            | 0.0007859   |
| rs974100    | 20 | 6923401 C             | 46 | 21 T            | 0.0007859   |
| rs974099    | 20 | 6923536 T             | 46 | 21 C            | 0.0007859   |
| rs6038994   | 20 | 7954930 A             | 18 | 3 G             | 0.0009486   |
| rs7270019   | 20 | 7955347 G             | 18 | 3 A             | 0.0009486   |
| rs28416521  | 20 | 11991252 A            | 39 | 13 G            | 0.0001767   |
| rs6134432   | 20 | 11991888 G            | 46 | 19 A            | 0.0002121   |
| rs2057051   | 20 | 11995353 G            | 44 | 18 A            | 0.0002208   |
| rs6131294   | 20 | 11995533 A            | 44 | 18 G            | 0.0002208   |
| rs13042149  | 20 | 11996643 T            | 46 | 21 A            | 0.0007859   |
| rs6131296   | 20 | 11996720 T            | 44 | 18 C            | 0.0002208   |
| rs11699987  | 20 | 11996731 G            | 44 | 18 C            | 0.0002208   |
| rs4814057   | 20 | 11997323 G            | 46 | 21 A            | 0.0007859   |
| rs35113459  | 20 | 11997518 A            | 44 | 18 AAT          | 0.0002208   |
| rs34813755  | 20 | 11999401 A            | 45 | 18 C            | 0.0001933   |
| rs73615533  | 20 | 11999580 T            | 44 | 18 TAGAG        | 0.0002208   |
| rs35172532  | 20 | 11999901 C            | 44 | 18 CTG          | 0.0002208   |
| rs6134436   | 20 | 12001080 T            | 44 | 18 C            | 0.0002208   |
| rs6041035   | 20 | 12002029 C            | 46 | 21 T            | 0.0007859   |
| rs4814059   | 20 | 12002915 G            | 44 | 18 A            | 0.0002208   |
| rs7344790   | 20 | 12004394 T            | 45 | 18 C            | 0.0001933   |
| rs7270764   | 20 | 12007223 T            | 41 | 12 C            | 0.00001087  |
| 20:13179440 | 20 | 13179440 T            | 50 | 17 TC           | 0.00000595  |
| 20:13179441 | 20 | 13179441 T            | 50 | 17 C            | 0.000006748 |
| 20:13179442 | 20 | 13179442 T            | 50 | 17 TTTCTTTC     | 0.000006748 |
| 20:13179448 | 20 | 13179448 T            | 44 | 15 TC           | 0.00003811  |
| 20:13179449 | 20 | 13179449 T            | 44 | 15 C            | 0.00003811  |
| 20:13711350 | 20 | 13711350 AT           | 20 | 1 A             | 0.00002287  |
| rs68012295  | 20 | 13754717 A            | 11 | 28 G            | 0.0008103   |

|             |    |                |    |         |            |
|-------------|----|----------------|----|---------|------------|
| rs6079176   | 20 | 13780386 A     | 10 | 27 G    | 0.0006386  |
| rs149543954 | 20 | 15302488 T     | 0  | 10 G    | 0.0006298  |
| rs6079925   | 20 | 15654234 C     | 40 | 14 G    | 0.0001172  |
| rs7362631   | 20 | 15656143 C     | 23 | 43 T    | 0.0002487  |
| rs7508866   | 20 | 19006113 C     | 0  | 9 A     | 0.0009641  |
| rs139749069 | 20 | 19015804 C     | 0  | 9 T     | 0.0009641  |
| rs199732390 | 20 | 19112927 T     | 54 | 26 TA   | 0.0008138  |
| rs55952965  | 20 | 19112931 T     | 53 | 26 TTTG | 0.0007605  |
| rs201489682 | 20 | 20163809 T     | 18 | 36 C    | 0.0008188  |
| rs2424350   | 20 | 20291451 G     | 9  | 26 A    | 0.0004896  |
| rs6075643   | 20 | 20298392 A     | 9  | 25 G    | 0.0008942  |
| rs11908058  | 20 | 20320836 A     | 14 | 33 G    | 0.0002703  |
| rs6036237   | 20 | 22838125 T     | 17 | 35 A    | 0.0007327  |
| rs6048387   | 20 | 22840461 T     | 14 | 35 A    | 0.00007667 |
| 20:24416229 | 20 | 24416229 A     | 1  | 13 G    | 0.0003716  |
| rs73609198  | 20 | 29543279 G     | 0  | 9 C     | 0.0009641  |
| rs71189955  | 20 | 38089215 CA    | 9  | 25 C    | 0.0009353  |
| rs141267243 | 20 | 40060527 A     | 0  | 9 G     | 0.0009641  |
| rs78132140  | 20 | 40124285 A     | 0  | 9 C     | 0.0009641  |
| rs3091450   | 20 | 42397496 T     | 6  | 22 C    | 0.000342   |
| rs140589268 | 20 | 47594416 T     | 0  | 9 C     | 0.0009641  |
| rs113924526 | 20 | 47599194 T     | 0  | 10 C    | 0.0004292  |
| rs111589018 | 20 | 49449156 C     | 1  | 12 G    | 0.0007887  |
| rs8113870   | 20 | 54723247 C     | 9  | 25 T    | 0.0008942  |
| rs74945693  | 20 | 54728926 C     | 0  | 9 T     | 0.0009641  |
| rs3044074   | 20 | 54730860 CTCTG | 1  | 12 C    | 0.0007887  |
| rs6024644   | 20 | 54731194 C     | 0  | 9 T     | 0.0009641  |
| rs113237261 | 20 | 54731908 TA    | 0  | 9 T     | 0.0009641  |
| rs6099014   | 20 | 54732154 C     | 0  | 9 T     | 0.0009641  |
| rs6014614   | 20 | 54733628 T     | 0  | 9 C     | 0.0009641  |
| rs6024645   | 20 | 54736770 T     | 0  | 9 C     | 0.0009641  |
| rs11348175  | 20 | 54737714 C     | 0  | 9 CT    | 0.0009641  |
| rs6024648   | 20 | 54739879 G     | 0  | 9 A     | 0.0009641  |
| rs11906763  | 20 | 54741180 C     | 0  | 9 A     | 0.0009641  |
| rs77061313  | 20 | 54744376 C     | 0  | 9 A     | 0.0009641  |
| rs73177764  | 20 | 55654497 T     | 10 | 27 A    | 0.0006386  |
| rs6069979   | 20 | 55661549 A     | 26 | 44 G    | 0.0008911  |
| rs6099453   | 20 | 55661811 A     | 27 | 45 C    | 0.0009136  |
| rs73145227  | 20 | 57872527 C     | 0  | 9 T     | 0.0009641  |
| rs28688816  | 20 | 59937912 A     | 5  | 19 G    | 0.0008415  |
| rs3936160   | 20 | 59938278 A     | 5  | 19 G    | 0.0008415  |

|             |    |                        |    |          |            |
|-------------|----|------------------------|----|----------|------------|
| rs28551468  | 20 | 59938740 G             | 11 | 28 A     | 0.0008103  |
| rs4074394   | 20 | 59940447 A             | 7  | 22 C     | 0.0009169  |
| rs28535181  | 20 | 59941064 A             | 7  | 22 G     | 0.0009169  |
| rs73134330  | 20 | 59942013 C             | 7  | 22 T     | 0.0009169  |
| rs34134614  | 20 | 59942301 T             | 7  | 22 TGA   | 0.0009169  |
| rs28839264  | 20 | 59943881 G             | 7  | 22 A     | 0.0009169  |
| rs28860773  | 20 | 59943935 G             | 7  | 22 A     | 0.0009169  |
| 20:61398964 | 20 | 61398964 G             | 0  | 13 GA    | 0.00003362 |
| 20:61398965 | 20 | 61398965 AGAGAGAGAAAAG | 0  | 13 A     | 0.00003362 |
| rs370856873 | 21 | 9411732 G              | 0  | 10 T     | 0.0004292  |
| rs376015153 | 21 | 9411998 C              | 0  | 10 T     | 0.0004292  |
| rs368544187 | 21 | 9412105 T              | 0  | 9 A      | 0.0009641  |
| rs374619179 | 21 | 9416098 A              | 0  | 9 T      | 0.0009641  |
| rs375752645 | 21 | 9425655 C              | 0  | 10 T     | 0.0004292  |
| rs369399988 | 21 | 9425841 T              | 0  | 10 C     | 0.0004292  |
| rs373254513 | 21 | 9453615 C              | 0  | 9 T      | 0.0009641  |
| rs375903391 | 21 | 9476421 G              | 0  | 10 A     | 0.0004292  |
| rs371571587 | 21 | 9503111 G              | 0  | 9 A      | 0.0009641  |
| rs369519916 | 21 | 9570920 T              | 0  | 9 A      | 0.0009641  |
| rs375391151 | 21 | 9594353 T              | 0  | 10 A     | 0.0004292  |
| 21:10085464 | 21 | 10085464 A             | 1  | 12 T     | 0.0007887  |
| 21:10596993 | 21 | 10596993 G             | 32 | 52 T     | 0.0001819  |
| rs2821885   | 21 | 14868113 T             | 1  | 13 G     | 0.0003716  |
| rs2775606   | 21 | 14868962 G             | 2  | 14 A     | 0.0009649  |
| rs1739233   | 21 | 14870697 T             | 1  | 13 C     | 0.0003716  |
| rs1997577   | 21 | 16371102 T             | 4  | 19 A     | 0.0004818  |
| rs7280064   | 21 | 16377650 T             | 4  | 19 C     | 0.0004818  |
| rs139790892 | 21 | 16377682 GC            | 4  | 19 G     | 0.0004818  |
| rs2823006   | 21 | 16380994 C             | 4  | 19 G     | 0.0004818  |
| rs28574812  | 21 | 16384940 G             | 5  | 20 A     | 0.0004383  |
| rs145267297 | 21 | 16391634 A             | 5  | 19 AAGAT | 0.0008415  |
| rs11909793  | 21 | 21821153 A             | 16 | 2 T      | 0.0008956  |
| rs57396480  | 21 | 24947685 T             | 4  | 18 TA    | 0.0009446  |
| rs8134027   | 21 | 31835840 A             | 2  | 14 G     | 0.0009649  |
| rs2298436   | 21 | 31864307 G             | 2  | 14 T     | 0.0009649  |
| rs9983828   | 21 | 32630308 C             | 27 | 48 T     | 0.0001523  |
| rs117407002 | 21 | 34530659 G             | 0  | 11 A     | 0.0001895  |
| rs3787870   | 21 | 39285453 G             | 53 | 24 A     | 0.00008869 |
| rs12329791  | 21 | 39646635 T             | 23 | 5 C      | 0.0006807  |
| rs2836269   | 21 | 39648790 A             | 23 | 5 G      | 0.0006807  |
| rs2836277   | 21 | 39652400 A             | 23 | 5 G      | 0.0006807  |

|             |    |                      |    |      |             |
|-------------|----|----------------------|----|------|-------------|
| rs8129961   | 21 | 39653928 T           | 23 | 5 C  | 0.0006807   |
| rs2836285   | 21 | 39656505 C           | 23 | 5 T  | 0.0006807   |
| rs2836286   | 21 | 39657252 T           | 23 | 5 C  | 0.0006807   |
| rs689400    | 21 | 40916094 T           | 22 | 4 C  | 0.00043     |
| rs2837074   | 21 | 40919955 A           | 22 | 4 G  | 0.00043     |
| rs657833    | 21 | 40920903 T           | 22 | 4 C  | 0.00043     |
| rs568840    | 21 | 40926000 T           | 22 | 4 C  | 0.00043     |
| rs2989335   | 21 | 40927346 C           | 23 | 4 A  | 0.0002248   |
| rs644080    | 21 | 40934470 G           | 22 | 4 A  | 0.00043     |
| rs571227    | 21 | 40935641 G           | 22 | 4 C  | 0.00043     |
| rs626856    | 21 | 40936014 C           | 22 | 4 A  | 0.00043     |
| rs613758    | 21 | 40936636 A           | 22 | 4 C  | 0.00043     |
| rs492140    | 21 | 40936776 G           | 22 | 4 T  | 0.00043     |
| rs611958    | 21 | 40937071 A           | 22 | 4 T  | 0.00043     |
| rs516865    | 21 | 40937191 C           | 22 | 4 T  | 0.00043     |
| rs611039    | 21 | 40937280 A           | 22 | 4 C  | 0.00043     |
| rs141986742 | 21 | 40937368 GTA         | 19 | 3 G  | 0.0004337   |
| rs112619200 | 21 | 40937832 AC          | 28 | 4 A  | 0.000007156 |
| rs523372    | 21 | 40937929 G           | 28 | 4 T  | 0.000007156 |
| 21:40938042 | 21 | 40938042 AT          | 28 | 4 A  | 0.000007156 |
| 21:40938043 | 21 | 40938043 GACGTAGAAAT | 28 | 4 G  | 0.000007156 |
| rs596320    | 21 | 40938269 C           | 28 | 4 T  | 0.000007156 |
| rs550774    | 21 | 40938562 C           | 28 | 4 T  | 0.000007156 |
| rs551624    | 21 | 40938643 T           | 28 | 4 C  | 0.000007156 |
| rs551830    | 21 | 40938715 T           | 28 | 4 C  | 0.000007156 |
| rs503729    | 21 | 40939493 C           | 28 | 4 G  | 0.000007156 |
| rs506387    | 21 | 40939762 T           | 28 | 4 C  | 0.000007156 |
| rs658066    | 21 | 40940223 A           | 28 | 4 G  | 0.000007156 |
| rs646823    | 21 | 40940402 A           | 23 | 4 T  | 0.00009765  |
| rs646320    | 21 | 40940532 G           | 33 | 11 A | 0.0006951   |
| rs538333    | 21 | 40940939 C           | 27 | 4 A  | 0.00001464  |
| rs561166    | 21 | 40941132 G           | 28 | 4 T  | 0.000007156 |
| rs2837083   | 21 | 40941250 A           | 28 | 4 G  | 0.000007156 |
| rs59155174  | 21 | 40941274 G           | 28 | 4 A  | 0.000007156 |
| rs562285    | 21 | 40941308 G           | 28 | 4 C  | 0.000007156 |
| rs563230    | 21 | 40941401 T           | 28 | 4 C  | 0.000007156 |
| rs563259    | 21 | 40941412 T           | 28 | 4 C  | 0.000007156 |
| rs564126    | 21 | 40941498 T           | 27 | 4 C  | 0.00001464  |
| rs630315    | 21 | 40941847 T           | 33 | 11 C | 0.0006951   |
| rs630270    | 21 | 40941891 G           | 28 | 4 A  | 0.000007156 |
| rs567837    | 21 | 40941914 G           | 28 | 4 C  | 0.000007156 |

|             |    |              |    |         |             |
|-------------|----|--------------|----|---------|-------------|
| rs629432    | 21 | 40942040 G   | 27 | 4 A     | 0.00001464  |
| rs628995    | 21 | 40942130 A   | 27 | 3 T     | 0.000003441 |
| rs617259    | 21 | 40942493 T   | 27 | 4 C     | 0.00001464  |
| rs602107    | 21 | 40943606 A   | 27 | 4 T     | 0.00001464  |
| rs601732    | 21 | 40943636 A   | 31 | 10 G    | 0.0006062   |
| rs542531    | 21 | 40944237 A   | 27 | 4 C     | 0.00001464  |
| rs34797170  | 21 | 40944570 C   | 27 | 4 CT    | 0.00001464  |
| rs585092    | 21 | 40945028 T   | 27 | 4 G     | 0.00001464  |
| rs376474175 | 21 | 40945600 G   | 23 | 3 GTA   | 0.00006268  |
| rs1734930   | 21 | 40946124 A   | 27 | 4 G     | 0.00001464  |
| rs636599    | 21 | 40947315 C   | 27 | 4 G     | 0.00001464  |
| rs141072016 | 21 | 40947736 C   | 25 | 4 CACAT | 0.00005893  |
| rs631454    | 21 | 40953128 C   | 27 | 5 T     | 0.00005212  |
| rs551680    | 21 | 40954708 A   | 27 | 5 G     | 0.00005212  |
| rs665778    | 21 | 40956847 A   | 27 | 5 C     | 0.00005212  |
| rs526526    | 21 | 40957080 G   | 27 | 5 A     | 0.00005212  |
| rs527343    | 21 | 40957134 A   | 27 | 5 C     | 0.00005212  |
| rs651607    | 21 | 40957728 T   | 27 | 5 C     | 0.00005212  |
| rs650633    | 21 | 40957936 T   | 27 | 5 C     | 0.00005212  |
| rs542574    | 21 | 40960292 A   | 27 | 5 G     | 0.00005212  |
| rs606414    | 21 | 40960892 T   | 27 | 5 C     | 0.00005212  |
| rs606003    | 21 | 40960984 T   | 27 | 5 C     | 0.00005212  |
| rs578349    | 21 | 40961915 G   | 27 | 5 T     | 0.00005212  |
| rs523893    | 21 | 40963407 A   | 26 | 5 G     | 0.0001012   |
| rs11356190  | 21 | 40963510 A   | 13 | 34 AT   | 0.0001142   |
| rs8128025   | 21 | 41413744 T   | 42 | 18 C    | 0.0006782   |
| 21:42820877 | 21 | 42820877 GCC | 12 | 32 G    | 0.0001005   |
| rs56232589  | 21 | 43023699 T   | 5  | 19 C    | 0.0008415   |
| rs10154196  | 21 | 43024004 A   | 5  | 19 G    | 0.0008415   |
| rs9285727   | 21 | 43026175 G   | 5  | 19 C    | 0.0008415   |
| rs79348973  | 21 | 43034276 G   | 0  | 9 A     | 0.0009641   |
| rs7284011   | 21 | 43913983 G   | 7  | 23 C    | 0.0004919   |
| rs2051329   | 21 | 43922997 C   | 7  | 23 T    | 0.0004919   |
| rs73233025  | 21 | 45894462 C   | 0  | 12 T    | 0.00008299  |
| rs73233026  | 21 | 45897036 G   | 0  | 12 T    | 0.00008299  |
| rs73233027  | 21 | 45897827 G   | 0  | 11 T    | 0.0001895   |
| rs146490633 | 21 | 45899411 C   | 0  | 11 G    | 0.0001895   |
| rs73233031  | 21 | 45917661 A   | 0  | 10 G    | 0.0004292   |
| rs62214403  | 21 | 46664698 A   | 11 | 0 G     | 0.0007855   |
| rs145556652 | 21 | 47747302 T   | 23 | 41 TTC  | 0.0008021   |
| rs2839318   | 21 | 47966810 C   | 29 | 9 G     | 0.0008145   |

|             |    |             |    |                  |             |
|-------------|----|-------------|----|------------------|-------------|
| 22:17703382 | 22 | 17703382 G  | 8  | 30 A             | 0.000004461 |
| 22:17703392 | 22 | 17703392 A  | 8  | 28 ATATATATATATA | 0.00002611  |
| rs376288107 | 22 | 18791397 T  | 0  | 9 C              | 0.0009641   |
| rs6005336   | 22 | 21391646 A  | 24 | 42 G             | 0.0008352   |
| rs6519738   | 22 | 21395756 A  | 27 | 46 T             | 0.0005154   |
| rs7291070   | 22 | 21395757 A  | 27 | 46 G             | 0.0005154   |
| rs6519739   | 22 | 21395784 C  | 27 | 46 T             | 0.0005154   |
| rs7287719   | 22 | 21395811 G  | 27 | 46 A             | 0.0005154   |
| rs5762046   | 22 | 21396651 T  | 28 | 47 A             | 0.0005255   |
| rs4586741   | 22 | 22740278 G  | 0  | 9 A              | 0.0009641   |
| rs8137706   | 22 | 27773685 T  | 3  | 19 C             | 0.0001254   |
| rs9614870   | 22 | 45069410 T  | 1  | 13 C             | 0.0003716   |
| rs9626231   | 22 | 45072227 A  | 1  | 12 C             | 0.0007119   |
| rs9626508   | 22 | 45073584 A  | 1  | 12 G             | 0.0007887   |
| rs9614873   | 22 | 45075015 G  | 1  | 12 C             | 0.0007887   |
| rs9614874   | 22 | 45075406 T  | 1  | 12 G             | 0.0007887   |
| rs9626514   | 22 | 45075854 A  | 1  | 12 G             | 0.0007887   |
| rs9626515   | 22 | 45075871 T  | 1  | 12 C             | 0.0007887   |
| rs9626232   | 22 | 45075876 A  | 1  | 12 G             | 0.0007887   |
| rs9614553   | 22 | 45076044 A  | 1  | 12 G             | 0.0007887   |
| rs9614554   | 22 | 45076061 C  | 1  | 12 G             | 0.0007887   |
| rs9614555   | 22 | 45076280 T  | 1  | 12 G             | 0.0007887   |
| rs9614875   | 22 | 45076306 T  | 1  | 12 A             | 0.0007887   |
| rs59936734  | 22 | 45076613 CA | 1  | 12 C             | 0.0007887   |
| rs9614558   | 22 | 45077861 T  | 1  | 12 C             | 0.0007887   |
| rs9614878   | 22 | 45078177 A  | 1  | 12 G             | 0.0007887   |
| rs62230575  | 22 | 45078240 G  | 1  | 12 T             | 0.0007887   |
| rs13054881  | 22 | 45078354 A  | 1  | 12 G             | 0.0007887   |
| rs34504565  | 22 | 45078443 A  | 1  | 12 G             | 0.0007887   |
| rs9626517   | 22 | 45078460 A  | 1  | 12 G             | 0.0007887   |
| rs9626518   | 22 | 45078496 A  | 1  | 12 G             | 0.0007887   |
| rs9626519   | 22 | 45078517 A  | 1  | 12 C             | 0.0007887   |
| rs9626520   | 22 | 45078578 T  | 1  | 12 C             | 0.0007887   |
| rs9626521   | 22 | 45078601 C  | 1  | 12 T             | 0.0007887   |
| rs9626522   | 22 | 45078618 T  | 1  | 12 C             | 0.0007887   |
| rs9626523   | 22 | 45078742 A  | 1  | 12 G             | 0.0007887   |
| rs56692566  | 22 | 45079237 C  | 1  | 12 T             | 0.0007887   |
| rs60280946  | 22 | 45079484 C  | 1  | 12 CTG           | 0.0007887   |
| rs12165506  | 22 | 45079804 G  | 1  | 12 A             | 0.0007887   |
| rs12169183  | 22 | 45079808 G  | 1  | 12 C             | 0.0007887   |
| rs12169228  | 22 | 45079901 T  | 1  | 12 C             | 0.0007887   |

|             |    |               |    |           |           |
|-------------|----|---------------|----|-----------|-----------|
| rs12169229  | 22 | 45079902 G    | 1  | 12 C      | 0.0007887 |
| rs28376449  | 22 | 45079927 G    | 1  | 12 C      | 0.0007887 |
| rs12170468  | 22 | 45079980 A    | 1  | 12 G      | 0.0007887 |
| rs12170556  | 22 | 45080124 A    | 1  | 12 G      | 0.0007887 |
| rs12169345  | 22 | 45080188 T    | 1  | 12 C      | 0.0007887 |
| rs12169373  | 22 | 45080205 T    | 1  | 12 C      | 0.0007887 |
| rs12167343  | 22 | 45080483 G    | 1  | 12 T      | 0.0007887 |
| rs9614879   | 22 | 45080502 G    | 1  | 12 A      | 0.0007887 |
| rs9626524   | 22 | 45080508 A    | 1  | 12 G      | 0.0007887 |
| rs9626525   | 22 | 45080543 G    | 1  | 12 T      | 0.0007887 |
| rs9626526   | 22 | 45080649 G    | 1  | 12 A      | 0.0007887 |
| rs12168856  | 22 | 45080989 C    | 1  | 12 T      | 0.0007887 |
| rs41396744  | 22 | 45081259 G    | 1  | 12 C      | 0.0007887 |
| rs41515447  | 22 | 45081330 G    | 1  | 12 A      | 0.0007887 |
| rs62230599  | 22 | 45081398 C    | 1  | 12 G      | 0.0007887 |
| rs62230600  | 22 | 45081571 A    | 1  | 12 G      | 0.0007887 |
| rs9627100   | 22 | 46582741 A    | 0  | 9 G       | 0.0009641 |
| rs9626751   | 22 | 46582838 A    | 0  | 9 G       | 0.0009641 |
| rs62225956  | 22 | 46584299 A    | 0  | 9 C       | 0.0009641 |
| rs62225957  | 22 | 46584370 G    | 0  | 9 C       | 0.0009641 |
| rs62225958  | 22 | 46591725 A    | 0  | 10 G      | 0.0004292 |
| rs59223524  | 22 | 46591845 A    | 0  | 10 G      | 0.0004292 |
| rs4253709   | 22 | 46594750 T    | 2  | 15 G      | 0.0004755 |
| rs17616262  | 22 | 48183889 T    | 20 | 40 G      | 0.0003188 |
| 22:49754905 | 22 | 49754905 T    | 16 | 2 C       | 0.0008956 |
| X:200525    | 23 | 200525 C      | 16 | 33 T      | 0.000596  |
| X:743185    | 23 | 743185 C      | 36 | 13 T      | 0.0006334 |
| X:743226    | 23 | 743226 T      | 34 | 13 C      | 0.000922  |
| X:876870    | 23 | 876870 C      | 48 | 23 G      | 0.0008881 |
| X:1817878   | 23 | 1817878 G     | 0  | 10 GTAATA | 0.0004292 |
| X:2388892   | 23 | 2388892 C     | 2  | 14 T      | 0.0009649 |
| X:2388923   | 23 | 2388923 C     | 3  | 16 T      | 0.0009912 |
| X:2388955   | 23 | 2388955 C     | 3  | 16 CTTGA  | 0.0009912 |
| rs6642024   | 23 | 2723666 C     | 14 | 32 T      | 0.0004925 |
| rs11797301  | 23 | 2723715 G     | 10 | 27 T      | 0.0006386 |
| rs2694739   | 23 | 3127599 T     | 41 | 17 C      | 0.0009864 |
| rs199795850 | 23 | 3127935 CTCTA | 41 | 17 C      | 0.0005984 |
| rs2704885   | 23 | 3128043 C     | 41 | 17 T      | 0.0005984 |
| rs2694736   | 23 | 3128251 G     | 41 | 17 A      | 0.0005984 |
| rs2694735   | 23 | 3128925 G     | 41 | 17 A      | 0.0005984 |
| rs1194562   | 23 | 3142180 A     | 40 | 15 G      | 0.0002535 |



|             |    |                |    |                  |            |
|-------------|----|----------------|----|------------------|------------|
| rs1194565   | 23 | 3143398 G      | 35 | 12 C             | 0.0004754  |
| rs7473053   | 23 | 3457060 T      | 28 | 46 C             | 0.0009321  |
| rs11152506  | 23 | 3458348 A      | 28 | 46 G             | 0.0009321  |
| rs6567560   | 23 | 3459334 C      | 28 | 46 T             | 0.0009321  |
| rs7474188   | 23 | 3459801 T      | 28 | 46 C             | 0.0009321  |
| rs200267680 | 23 | 3473257 C      | 28 | 47 T             | 0.0005255  |
| rs34949495  | 23 | 4590736 CA     | 15 | 33 C             | 0.0004934  |
| rs5915772   | 23 | 4591677 T      | 10 | 27 C             | 0.0006386  |
| rs5916687   | 23 | 4596138 A      | 10 | 29 G             | 0.0001875  |
| rs5916688   | 23 | 4596415 T      | 10 | 29 C             | 0.0001875  |
| rs12848207  | 23 | 4601110 A      | 11 | 29 C             | 0.0004498  |
| rs7881910   | 23 | 4628697 A      | 57 | 29 C             | 0.0002928  |
| rs5916697   | 23 | 4628916 T      | 29 | 47 C             | 0.0009467  |
| rs72609517  | 23 | 6040845 G      | 0  | 13 A             | 0.00004253 |
| rs200717890 | 23 | 6041758 GGAAAA | 0  | 13 G             | 0.00004253 |
| rs16984312  | 23 | 6666678 C      | 37 | 14 T             | 0.0006739  |
| rs16984313  | 23 | 6666760 T      | 37 | 14 C             | 0.0006739  |
| rs2521390   | 23 | 9456529 G      | 29 | 47 A             | 0.0009467  |
| rs2681635   | 23 | 9462851 A      | 29 | 47 G             | 0.0009467  |
| rs62918660  | 23 | 9463932 C      | 27 | 47 CAT           | 0.0002837  |
| rs17321022  | 23 | 9594445 G      | 18 | 3 C              | 0.0009486  |
| rs201682170 | 23 | 9599039 A      | 20 | 3 AAT            | 0.000269   |
| rs5934663   | 23 | 9601245 A      | 20 | 3 T              | 0.000269   |
| rs2040616   | 23 | 9605377 A      | 20 | 3 C              | 0.000269   |
| rs6419032   | 23 | 9606946 C      | 20 | 3 T              | 0.000269   |
| rs2040615   | 23 | 9627214 A      | 18 | 1 G              | 0.00004271 |
| rs5933750   | 23 | 9643364 A      | 15 | 33 G             | 0.0005689  |
| rs73476680  | 23 | 9926620 C      | 12 | 0 T              | 0.0003752  |
| rs144584394 | 23 | 9928518 A      | 13 | 0 G              | 0.0001783  |
| rs73192426  | 23 | 12427935 A     | 43 | 16 C             | 0.00009051 |
| rs16986854  | 23 | 12431238 A     | 40 | 12 G             | 0.00002131 |
| rs72614507  | 23 | 13587829 G     | 19 | 3 T              | 0.0005082  |
| rs150007863 | 23 | 19089203 G     | 1  | 13 A             | 0.0003716  |
| rs7066463   | 23 | 21918357 G     | 37 | 13 T             | 0.0005994  |
| rs5951526   | 23 | 22284928 T     | 1  | 12 C             | 0.0007887  |
| rs5904523   | 23 | 22285006 T     | 35 | 13 A             | 0.000996   |
| rs1911645   | 23 | 22498476 A     | 5  | 19 G             | 0.0008415  |
| rs7059501   | 23 | 22518710 G     | 5  | 19 T             | 0.0008415  |
| X:22554130  | 23 | 22554130 A     | 5  | 23 ATTTGACATACCG | 0.00005584 |
| rs2040774   | 23 | 22821307 A     | 23 | 42 G             | 0.0004519  |
| rs5926337   | 23 | 23465760 C     | 17 | 1 T              | 0.00008737 |

|             |    |             |    |       |            |
|-------------|----|-------------|----|-------|------------|
| rs5986537   | 23 | 25964013 G  | 8  | 27 A  | 0.00009961 |
| rs5986539   | 23 | 25968617 G  | 8  | 27 C  | 0.00009961 |
| rs5986294   | 23 | 25970209 T  | 8  | 27 C  | 0.00009961 |
| rs5986590   | 23 | 26223982 T  | 13 | 30 C  | 0.0007578  |
| rs12394146  | 23 | 26225684 T  | 14 | 31 C  | 0.0008795  |
| rs1476724   | 23 | 26233177 C  | 10 | 29 T  | 0.0001888  |
| rs977338    | 23 | 26266547 T  | 19 | 37 C  | 0.0009069  |
| rs5943880   | 23 | 26267490 C  | 19 | 37 T  | 0.0009069  |
| rs35042932  | 23 | 26269948 C  | 30 | 49 CT | 0.0008996  |
| rs4475663   | 23 | 26271482 G  | 13 | 30 A  | 0.0007578  |
| rs5944389   | 23 | 26273505 A  | 30 | 49 G  | 0.0008996  |
| rs721987    | 23 | 26273713 C  | 13 | 30 T  | 0.0007578  |
| rs5943882   | 23 | 26274682 A  | 16 | 35 T  | 0.0005888  |
| rs34472916  | 23 | 26277903 GT | 19 | 37 G  | 0.0009069  |
| rs59852885  | 23 | 26278248 GT | 19 | 37 G  | 0.0009069  |
| rs5944534   | 23 | 26606227 G  | 25 | 43 A  | 0.0008649  |
| rs10482291  | 23 | 26608123 G  | 25 | 43 C  | 0.0008649  |
| rs7054599   | 23 | 26609360 A  | 26 | 44 G  | 0.0008911  |
| rs35413652  | 23 | 26612217 TC | 26 | 44 T  | 0.0008911  |
| rs5944535   | 23 | 26612639 C  | 26 | 44 G  | 0.0008911  |
| rs5944537   | 23 | 26613253 A  | 26 | 44 C  | 0.0008911  |
| rs144349945 | 23 | 26613381 CT | 26 | 44 C  | 0.0008911  |
| rs76835086  | 23 | 26613383 A  | 26 | 44 C  | 0.0008911  |
| rs5944539   | 23 | 26613671 A  | 26 | 44 G  | 0.0008911  |
| rs2215098   | 23 | 26618573 A  | 26 | 44 G  | 0.0008911  |
| rs5901821   | 23 | 26620088 GA | 26 | 44 G  | 0.0008911  |
| X:26620893  | 23 | 26620893 TC | 18 | 37 T  | 0.0008489  |
| rs9887413   | 23 | 26621343 G  | 26 | 44 A  | 0.0008911  |
| rs5943945   | 23 | 26621949 A  | 26 | 44 G  | 0.0008911  |
| rs5944545   | 23 | 26622118 A  | 26 | 44 T  | 0.0008911  |
| rs988431    | 23 | 26623255 T  | 26 | 44 A  | 0.0008911  |
| rs5944546   | 23 | 26624317 A  | 26 | 44 T  | 0.0008911  |
| rs5944547   | 23 | 26624744 G  | 26 | 44 A  | 0.0008911  |
| rs989000    | 23 | 26625309 T  | 26 | 44 A  | 0.0008911  |
| rs988999    | 23 | 26625337 C  | 26 | 44 T  | 0.0008911  |
| rs988998    | 23 | 26625516 G  | 26 | 44 A  | 0.0008911  |
| rs5986627   | 23 | 26625579 C  | 26 | 44 A  | 0.0008911  |
| rs78502736  | 23 | 26625869 T  | 26 | 44 TA | 0.0008911  |
| rs35744125  | 23 | 26625946 C  | 26 | 44 CA | 0.0008911  |
| rs5986333   | 23 | 26626529 A  | 26 | 44 C  | 0.0008911  |
| rs758175    | 23 | 26631265 T  | 26 | 44 C  | 0.0008911  |

|             |    |              |    |       |            |
|-------------|----|--------------|----|-------|------------|
| rs5986629   | 23 | 26633883 A   | 26 | 44 G  | 0.0008911  |
| rs5986631   | 23 | 26635139 T   | 26 | 44 C  | 0.0008911  |
| rs5944548   | 23 | 26636386 G   | 24 | 44 A  | 0.0004371  |
| rs60978572  | 23 | 26638392 A   | 26 | 44 G  | 0.0008911  |
| rs1921978   | 23 | 26641227 T   | 26 | 44 C  | 0.0008911  |
| rs5943947   | 23 | 26642574 T   | 26 | 44 G  | 0.0008911  |
| rs4898185   | 23 | 26650298 G   | 47 | 22 A  | 0.0008379  |
| rs5944555   | 23 | 26653460 G   | 47 | 22 T  | 0.0008379  |
| rs5943950   | 23 | 26665926 C   | 47 | 22 T  | 0.0008379  |
| rs5944558   | 23 | 26666834 T   | 47 | 22 G  | 0.0008379  |
| rs5986336   | 23 | 26669266 A   | 47 | 22 T  | 0.0008379  |
| rs4898186   | 23 | 26683055 T   | 47 | 22 A  | 0.0008379  |
| rs12844113  | 23 | 26685219 C   | 17 | 39 T  | 0.0002254  |
| rs7880631   | 23 | 26685231 C   | 48 | 22 G  | 0.0002216  |
| rs5944563   | 23 | 26688068 C   | 47 | 22 G  | 0.0008379  |
| rs7472212   | 23 | 29734467 C   | 24 | 43 G  | 0.000471   |
| rs76973499  | 23 | 31873313 GTT | 43 | 19 G  | 0.000761   |
| rs5928085   | 23 | 32851060 A   | 25 | 43 G  | 0.0008649  |
| rs5928229   | 23 | 33314650 A   | 5  | 19 G  | 0.0008415  |
| rs9887051   | 23 | 33393169 C   | 23 | 3 T   | 0.00006268 |
| rs150218268 | 23 | 33394045 T   | 23 | 3 C   | 0.00006268 |
| rs62594431  | 23 | 33394466 A   | 23 | 3 T   | 0.00006268 |
| rs28731408  | 23 | 36990246 G   | 24 | 4 T   | 0.00005999 |
| rs77729295  | 23 | 40070772 C   | 26 | 45 T  | 0.0005028  |
| rs12395423  | 23 | 40070894 C   | 26 | 45 T  | 0.0005028  |
| rs12395451  | 23 | 40070960 C   | 26 | 45 T  | 0.0005028  |
| rs4240043   | 23 | 40072652 C   | 27 | 45 T  | 0.0009136  |
| rs5963763   | 23 | 40076745 G   | 26 | 45 A  | 0.0005028  |
| rs5963167   | 23 | 40076763 T   | 27 | 45 C  | 0.0009136  |
| rs10126799  | 23 | 40076904 G   | 27 | 45 A  | 0.0009136  |
| rs201133418 | 23 | 40077858 C   | 19 | 39 CT | 0.0005281  |
| rs6520627   | 23 | 40078795 G   | 30 | 47 A  | 0.0008836  |
| rs56284094  | 23 | 40079406 C   | 31 | 49 T  | 0.0009634  |
| rs6651731   | 23 | 40080990 T   | 30 | 50 C  | 0.0002951  |
| rs5963764   | 23 | 40081369 A   | 31 | 50 T  | 0.0005409  |
| rs9785476   | 23 | 40086428 G   | 29 | 48 A  | 0.0005332  |
| rs61519777  | 23 | 40086585 T   | 30 | 48 C  | 0.0009571  |
| rs60570570  | 23 | 40087561 C   | 30 | 48 T  | 0.0009571  |
| rs17148391  | 23 | 40088000 C   | 30 | 48 T  | 0.0009571  |
| X:41868970  | 23 | 41868970 A   | 0  | 10 G  | 0.0004292  |
| rs190932725 | 23 | 41889467 A   | 0  | 9 G   | 0.0009641  |

|             |    |                |    |           |             |
|-------------|----|----------------|----|-----------|-------------|
| rs200527041 | 23 | 42065819 C     | 50 | 23 T      | 0.0004802   |
| rs5918304   | 23 | 42077458 G     | 40 | 16 A      | 0.0005221   |
| rs6610672   | 23 | 42084024 G     | 40 | 16 A      | 0.0005221   |
| rs5905679   | 23 | 43957659 T     | 26 | 45 C      | 0.0008375   |
| rs5905680   | 23 | 43957749 C     | 29 | 49 A      | 0.0002928   |
| rs5905684   | 23 | 43959356 T     | 26 | 45 C      | 0.0005028   |
| rs5953230   | 23 | 43959901 C     | 27 | 49 T      | 0.00007972  |
| rs4532735   | 23 | 43960365 A     | 26 | 47 G      | 0.0001488   |
| rs5905687   | 23 | 43963452 T     | 27 | 46 C      | 0.0005154   |
| rs5905688   | 23 | 43964530 T     | 27 | 46 C      | 0.0005154   |
| rs17300214  | 23 | 44430573 C     | 15 | 1 T       | 0.0003561   |
| rs143649408 | 23 | 45585221 C     | 26 | 45 CA     | 0.0002571   |
| rs56976399  | 23 | 45634577 A     | 13 | 34 C      | 0.00006374  |
| rs5906069   | 23 | 45638441 G     | 13 | 30 A      | 0.0007578   |
| rs5906073   | 23 | 45642604 C     | 19 | 37 T      | 0.0009069   |
| rs12846518  | 23 | 46934714 T     | 16 | 34 C      | 0.0006492   |
| rs6520361   | 23 | 48413952 T     | 8  | 25 C      | 0.0003633   |
| rs235833    | 23 | 48423977 C     | 4  | 20 G      | 0.0001364   |
| rs112733390 | 23 | 53388342 CGAAA | 45 | 19 C      | 0.0003833   |
| rs7058180   | 23 | 53392821 T     | 45 | 19 G      | 0.0003833   |
| rs5978131   | 23 | 53420510 T     | 46 | 21 C      | 0.0007859   |
| rs1264007   | 23 | 53433377 C     | 45 | 19 A      | 0.0003833   |
| rs1264009   | 23 | 53446146 A     | 46 | 19 G      | 0.0002121   |
| rs1264011   | 23 | 53449568 G     | 45 | 19 A      | 0.0003833   |
| rs1264012   | 23 | 53454380 T     | 45 | 19 C      | 0.0003833   |
| rs1264013   | 23 | 53457622 T     | 45 | 19 C      | 0.0003833   |
| rs1264014   | 23 | 53461359 G     | 45 | 19 C      | 0.0004142   |
| rs1264015   | 23 | 53464789 C     | 47 | 21 T      | 0.0004473   |
| rs1268420   | 23 | 53465014 A     | 45 | 19 G      | 0.0003833   |
| rs1264016   | 23 | 53467212 G     | 45 | 19 A      | 0.0003833   |
| rs1264017   | 23 | 53468729 T     | 45 | 19 G      | 0.0003833   |
| rs1264018   | 23 | 53471786 A     | 47 | 17 G      | 0.00001863  |
| rs56902142  | 23 | 53488796 G     | 49 | 20 C      | 0.00006674  |
| rs57500243  | 23 | 53488797 G     | 49 | 20 A      | 0.00006674  |
| rs76672031  | 23 | 53488798 T     | 49 | 20 TCTCAC | 0.00006674  |
| rs57928918  | 23 | 53488804 T     | 49 | 20 C      | 0.00006674  |
| rs6638394   | 23 | 53507175 A     | 48 | 18 G      | 0.00005283  |
| rs6638395   | 23 | 53507192 C     | 48 | 18 T      | 0.00002445  |
| rs6529681   | 23 | 53520450 G     | 48 | 17 A      | 0.00001451  |
| rs35423729  | 23 | 53521162 C     | 51 | 20 CG     | 0.000003551 |
| rs414960    | 23 | 53521570 T     | 46 | 20 G      | 0.0004155   |

|             |    |                 |    |           |            |
|-------------|----|-----------------|----|-----------|------------|
| rs6529683   | 23 | 53542091 G      | 52 | 23 C      | 0.00008358 |
| rs6529684   | 23 | 53542107 A      | 52 | 22 G      | 0.00004088 |
| rs266785    | 23 | 53550396 A      | 52 | 23 G      | 0.00008358 |
| rs138150690 | 23 | 53550777 T      | 52 | 22 TA     | 0.00004088 |
| rs6638399   | 23 | 53553599 C      | 51 | 23 G      | 0.000156   |
| rs12687615  | 23 | 53554490 T      | 52 | 22 C      | 0.00004088 |
| rs12688962  | 23 | 53554556 C      | 52 | 22 G      | 0.00007255 |
| rs3747437   | 23 | 53562653 G      | 52 | 23 C      | 0.00008358 |
| rs7061946   | 23 | 53567451 G      | 52 | 24 A      | 0.00008225 |
| rs5978135   | 23 | 53576978 G      | 53 | 24 C      | 0.00008869 |
| rs5978136   | 23 | 53599113 A      | 52 | 24 G      | 0.0001653  |
| rs35473057  | 23 | 53601990 A      | 52 | 24 C      | 0.0001653  |
| rs200129868 | 23 | 53606383 G      | 52 | 25 A      | 0.0005313  |
| rs1244412   | 23 | 53606926 T      | 52 | 23 A      | 0.0001455  |
| rs266786    | 23 | 53607754 C      | 52 | 23 A      | 0.00008358 |
| rs201921493 | 23 | 53616093 C      | 53 | 23 CCACTT | 0.00004378 |
| rs266783    | 23 | 53621006 C      | 46 | 23 G      | 0.0004343  |
| rs1244413   | 23 | 53622078 A      | 52 | 23 T      | 0.00008358 |
| rs12850534  | 23 | 53629204 T      | 53 | 23 C      | 0.00003705 |
| rs6638408   | 23 | 53633493 C      | 52 | 23 T      | 0.00008358 |
| rs35007111  | 23 | 53635340 CAT    | 53 | 23 C      | 0.00002053 |
| rs12838744  | 23 | 53641013 G      | 52 | 23 A      | 0.00008358 |
| rs6638360   | 23 | 53641647 T      | 53 | 23 C      | 0.00004378 |
| rs12861474  | 23 | 53643671 A      | 53 | 23 G      | 0.00004378 |
| rs414923    | 23 | 53646789 A      | 52 | 23 G      | 0.00008358 |
| rs155441    | 23 | 53648864 A      | 53 | 23 G      | 0.00004378 |
| rs1858002   | 23 | 53649492 G      | 52 | 23 A      | 0.00008358 |
| rs6638409   | 23 | 53659047 C      | 52 | 23 T      | 0.00008358 |
| rs6638410   | 23 | 53662826 T      | 53 | 23 C      | 0.00004378 |
| rs6638361   | 23 | 53667634 C      | 53 | 24 T      | 0.00008869 |
| rs198508    | 23 | 53667875 G      | 52 | 23 A      | 0.00008358 |
| rs12851158  | 23 | 53670842 C      | 52 | 23 A      | 0.00008358 |
| rs3788947   | 23 | 53675478 A      | 51 | 23 C      | 0.00007776 |
| rs3788948   | 23 | 53675488 A      | 49 | 24 C      | 0.0002665  |
| rs6638411   | 23 | 53682038 G      | 51 | 23 A      | 0.000156   |
| rs2036658   | 23 | 53682332 C      | 50 | 23 G      | 0.0002847  |
| rs6638413   | 23 | 53686534 G      | 52 | 24 A      | 0.0001653  |
| rs10533508  | 23 | 53687844 CTCAAG | 53 | 23 C      | 0.00004378 |
| rs6638414   | 23 | 53689992 G      | 52 | 23 A      | 0.00008358 |
| rs6638417   | 23 | 53709964 A      | 53 | 23 G      | 0.00004378 |
| rs6638364   | 23 | 53717223 T      | 51 | 25 C      | 0.0002971  |

|             |    |                        |    |                  |           |
|-------------|----|------------------------|----|------------------|-----------|
| rs76983280  | 23 | 53772116 TGTAAGATATAAC | 53 | 27 T             | 0.0006109 |
| rs199990477 | 23 | 53772387 G             | 53 | 23 GT            | 0.0001357 |
| rs12383852  | 23 | 53772556 C             | 52 | 25 T             | 0.0005313 |
| rs5936593   | 23 | 70035880 A             | 48 | 23 G             | 0.0008881 |
| rs5936994   | 23 | 70036041 C             | 48 | 23 T             | 0.0008881 |
| rs5936997   | 23 | 70039038 A             | 48 | 23 G             | 0.0008881 |
| rs6624505   | 23 | 70043864 T             | 48 | 23 C             | 0.0008881 |
| rs6624506   | 23 | 70044280 T             | 48 | 23 C             | 0.0008881 |
| rs5936999   | 23 | 70044965 A             | 48 | 23 C             | 0.0008881 |
| rs150018032 | 23 | 70094743 A             | 18 | 2 G              | 0.0002408 |
| rs201334832 | 23 | 70105023 TG            | 17 | 2 T              | 0.000467  |
| rs151194156 | 23 | 70122562 A             | 36 | 12 G             | 0.0002646 |
| rs6653183   | 23 | 71316493 T             | 21 | 3 A              | 0.0002475 |
| rs6625945   | 23 | 71323100 A             | 21 | 3 G              | 0.0002475 |
| rs111997647 | 23 | 71325825 C             | 21 | 3 T              | 0.0002475 |
| rs6525588   | 23 | 71394102 G             | 20 | 2 C              | 0.0006204 |
| rs55703267  | 23 | 71397737 A             | 20 | 2 G              | 0.0006204 |
| rs72630041  | 23 | 71399338 G             | 16 | 2 A              | 0.0008037 |
| rs59979642  | 23 | 71419655 A             | 18 | 2 ATGGACCTC      | 0.0004898 |
| rs56114250  | 23 | 71534308 T             | 11 | 0 C              | 0.0007855 |
| rs7886860   | 23 | 78029689 T             | 18 | 3 C              | 0.0009486 |
| rs146390190 | 23 | 78032346 G             | 35 | 13 GT            | 0.000996  |
| rs67029763  | 23 | 78045223 C             | 30 | 10 A             | 0.0009218 |
| rs5922956   | 23 | 83549398 G             | 0  | 9 T              | 0.000946  |
| rs58576073  | 23 | 83679457 T             | 3  | 17 TA            | 0.0005279 |
| rs5922048   | 23 | 83689867 C             | 3  | 19 T             | 0.0001254 |
| rs201647610 | 23 | 83849660 CAT           | 0  | 12 C             | 0.0009666 |
| X:86268314  | 23 | 86268314 C             | 12 | 31 CTGGTGCATTTAC | 0.0006149 |
| rs139097899 | 23 | 87238699 G             | 5  | 20 A             | 0.0004383 |
| rs138523332 | 23 | 87290113 A             | 4  | 20 G             | 0.0001364 |
| rs6522031   | 23 | 87598676 A             | 1  | 13 G             | 0.0003716 |
| rs6617621   | 23 | 87650084 C             | 1  | 16 T             | 0.0003625 |
| rs73238213  | 23 | 88290481 G             | 0  | 11 A             | 0.0001895 |
| rs73244246  | 23 | 88450939 C             | 0  | 11 T             | 0.0001895 |
| rs4243361   | 23 | 90192817 G             | 26 | 44 A             | 0.0007829 |
| rs2988819   | 23 | 90200597 G             | 26 | 44 C             | 0.0007829 |
| rs138123288 | 23 | 90222271 C             | 23 | 44 G             | 0.0003924 |
| rs114041692 | 23 | 90245638 A             | 25 | 44 T             | 0.00081   |
| rs112326780 | 23 | 90253572 T             | 24 | 44 C             | 0.0007371 |
| rs78423501  | 23 | 90406523 A             | 13 | 31 G             | 0.0007873 |
| rs201479842 | 23 | 90406997 T             | 12 | 31 G             | 0.0006149 |

|             |    |                 |    |      |            |
|-------------|----|-----------------|----|------|------------|
| rs4020573   | 23 | 91818820 G      | 26 | 44 A | 0.0008911  |
| rs4020577   | 23 | 91818950 A      | 26 | 44 G | 0.0008911  |
| rs144461863 | 23 | 91819375 G      | 26 | 44 C | 0.0008911  |
| rs2750542   | 23 | 91821681 A      | 26 | 44 T | 0.0008911  |
| rs202129962 | 23 | 91827711 C      | 26 | 45 T | 0.0005028  |
| rs144283232 | 23 | 91834197 C      | 26 | 45 T | 0.0005028  |
| rs3952482   | 23 | 91835233 C      | 24 | 41 T | 0.0007073  |
| rs2506262   | 23 | 92119324 T      | 14 | 32 G | 0.0004925  |
| rs34542839  | 23 | 93172070 AT     | 48 | 22 A | 0.0004783  |
| rs62595208  | 23 | 93178452 T      | 36 | 12 C | 0.0002646  |
| rs12156716  | 23 | 93181586 T      | 48 | 22 C | 0.0004783  |
| rs62595211  | 23 | 93192956 T      | 48 | 22 C | 0.0004783  |
| rs11796448  | 23 | 93305179 G      | 9  | 26 A | 0.0004648  |
| rs11091940  | 23 | 93311355 G      | 11 | 28 A | 0.0008103  |
| rs139562096 | 23 | 101097636 C     | 18 | 3 G  | 0.0009486  |
| rs7058718   | 23 | 102914790 A     | 49 | 24 G | 0.000936   |
| rs210434    | 23 | 104949928 G     | 2  | 19 A | 0.00002464 |
| rs5962574   | 23 | 104956461 T     | 1  | 16 G | 0.00003625 |
| rs210439    | 23 | 104959059 G     | 2  | 19 A | 0.00002464 |
| rs79773397  | 23 | 104961028 G     | 2  | 18 A | 0.00005262 |
| rs3038940   | 23 | 104963739 TAA   | 2  | 15 T | 0.0004445  |
| rs73636261  | 23 | 104964027 C     | 2  | 19 T | 0.00002464 |
| rs113785568 | 23 | 104965409 CA    | 2  | 16 C | 0.0001031  |
| rs11449372  | 23 | 104971032 AT    | 2  | 17 A | 0.0001038  |
| rs7891511   | 23 | 104973602 G     | 2  | 19 T | 0.00002464 |
| rs11092543  | 23 | 104975253 T     | 1  | 16 C | 0.00003625 |
| rs5962575   | 23 | 104981504 C     | 2  | 19 T | 0.00002464 |
| rs5962297   | 23 | 104983013 T     | 1  | 16 C | 0.00003625 |
| rs200458290 | 23 | 104983337 GATTT | 2  | 19 G | 0.00002464 |
| rs112243672 | 23 | 104984012 C     | 1  | 16 T | 0.00003625 |
| rs4347108   | 23 | 104984105 T     | 1  | 16 G | 0.00003625 |
| rs60192032  | 23 | 104984989 T     | 1  | 16 C | 0.00003625 |
| rs5962577   | 23 | 104985164 C     | 1  | 16 T | 0.00003625 |
| rs5962578   | 23 | 104985376 A     | 1  | 16 G | 0.00003625 |
| rs10126447  | 23 | 104988706 G     | 2  | 19 A | 0.00002464 |
| rs10218388  | 23 | 104988949 C     | 2  | 19 T | 0.00002464 |
| rs3764765   | 23 | 104992963 C     | 2  | 19 T | 0.00002464 |
| rs5962298   | 23 | 104993513 G     | 2  | 19 A | 0.00002464 |
| rs5962579   | 23 | 104994182 T     | 2  | 19 A | 0.00002464 |
| rs5903270   | 23 | 104994857 GA    | 3  | 16 G | 0.0005264  |
| rs9887672   | 23 | 104996155 T     | 1  | 16 C | 0.00003625 |

|             |    |              |    |              |             |
|-------------|----|--------------|----|--------------|-------------|
| rs59823277  | 23 | 105002403 A  | 1  | 16 ATC       | 0.00003625  |
| rs201435006 | 23 | 105050984 GT | 1  | 14 G         | 0.0001538   |
| rs103026    | 23 | 105088008 C  | 1  | 15 G         | 0.00007717  |
| rs77665272  | 23 | 105122322 A  | 1  | 14 G         | 0.000173    |
| rs5962597   | 23 | 105151664 T  | 1  | 14 C         | 0.000173    |
| rs5962608   | 23 | 105236119 T  | 9  | 25 G         | 0.0009353   |
| rs78553510  | 23 | 105268812 C  | 1  | 14 CT        | 0.000173    |
| rs150724424 | 23 | 109752418 A  | 11 | 0 G          | 0.0007855   |
| rs141911700 | 23 | 109770433 G  | 12 | 0 A          | 0.0003752   |
| X:109846096 | 23 | 109846096 T  | 12 | 0 C          | 0.0003752   |
| rs149294490 | 23 | 109887848 G  | 12 | 0 A          | 0.0003752   |
| rs141590782 | 23 | 110212107 A  | 11 | 0 G          | 0.0007855   |
| rs16986963  | 23 | 111647953 A  | 11 | 0 G          | 0.0007855   |
| rs137987863 | 23 | 113397120 C  | 0  | 12 T         | 0.00008299  |
| rs143901299 | 23 | 113452552 T  | 0  | 10 C         | 0.0004292   |
| rs5946279   | 23 | 114337482 A  | 25 | 43 C         | 0.0008649   |
| rs150903498 | 23 | 114569770 T  | 26 | 4 C          | 0.00002957  |
| rs7884307   | 23 | 114574640 A  | 27 | 4 C          | 0.00001464  |
| rs73636279  | 23 | 114576213 C  | 27 | 4 A          | 0.00001464  |
| rs78902560  | 23 | 114578966 C  | 29 | 4 A          | 0.000003453 |
| rs73636280  | 23 | 114579062 T  | 29 | 4 C          | 0.000003453 |
| rs201116393 | 23 | 114579152 C  | 28 | 4 CCACACGGTA | 0.000006572 |
| rs148225485 | 23 | 114579323 A  | 28 | 4 C          | 0.000007156 |
| rs73580006  | 23 | 114579496 T  | 29 | 4 C          | 0.000003453 |
| rs7891269   | 23 | 114580249 C  | 29 | 4 T          | 0.000003453 |
| rs7886209   | 23 | 114580270 A  | 29 | 4 G          | 0.000003453 |
| rs7891410   | 23 | 114580274 C  | 29 | 4 T          | 0.000003453 |
| rs1884396   | 23 | 114580445 C  | 28 | 4 T          | 0.000007156 |
| rs375467466 | 23 | 114582884 T  | 27 | 4 G          | 0.000007583 |
| rs73580011  | 23 | 114583333 A  | 29 | 4 G          | 0.000003453 |
| rs73580014  | 23 | 114583399 C  | 28 | 4 A          | 0.000007156 |
| rs73580016  | 23 | 114583776 G  | 28 | 4 A          | 0.000007156 |
| rs73580018  | 23 | 114584158 C  | 29 | 4 T          | 0.000003453 |
| rs147457731 | 23 | 114584186 C  | 29 | 4 T          | 0.000003453 |
| rs73580019  | 23 | 114584656 C  | 29 | 4 T          | 0.000003453 |
| rs10521696  | 23 | 114584805 G  | 29 | 4 A          | 0.000003453 |
| rs73580022  | 23 | 114587083 A  | 29 | 4 T          | 0.000003453 |
| rs73580023  | 23 | 114587527 T  | 28 | 4 C          | 0.000007156 |
| rs5987877   | 23 | 114587714 C  | 28 | 4 T          | 0.000007156 |
| rs5987878   | 23 | 114587792 C  | 28 | 4 T          | 0.000008243 |
| rs17095493  | 23 | 114588167 T  | 29 | 4 A          | 0.000003453 |



|             |    |                        |    |       |             |
|-------------|----|------------------------|----|-------|-------------|
| rs112945252 | 23 | 114588241 A            | 28 | 4 G   | 0.000007156 |
| rs4911795   | 23 | 114589262 G            | 29 | 4 T   | 0.000003453 |
| rs59969921  | 23 | 114589858 G            | 29 | 4 A   | 0.000003453 |
| rs4911814   | 23 | 114590155 C            | 28 | 4 T   | 0.000007156 |
| rs4911816   | 23 | 114590336 A            | 29 | 4 G   | 0.000003453 |
| rs1321125   | 23 | 114591500 G            | 28 | 4 C   | 0.000007156 |
| rs2231      | 23 | 114591894 C            | 29 | 4 T   | 0.000004064 |
| rs5987726   | 23 | 114591955 C            | 29 | 4 T   | 0.000003453 |
| rs73580032  | 23 | 114592176 A            | 28 | 4 G   | 0.000007156 |
| rs73580034  | 23 | 114592197 A            | 28 | 4 G   | 0.000007156 |
| rs1853000   | 23 | 114593037 G            | 28 | 4 A   | 0.000007156 |
| rs1853001   | 23 | 114593073 C            | 29 | 4 T   | 0.000003453 |
| rs59121764  | 23 | 114594049 C            | 29 | 4 T   | 0.000003453 |
| rs35036780  | 23 | 114594708 G            | 29 | 4 A   | 0.000003453 |
| rs113910546 | 23 | 114595258 A            | 29 | 4 G   | 0.000003453 |
| rs112652023 | 23 | 114596923 A            | 29 | 4 G   | 0.000003453 |
| rs725102    | 23 | 114601290 G            | 29 | 4 A   | 0.000003453 |
| rs112071098 | 23 | 114604239 A            | 29 | 4 C   | 0.000003453 |
| rs7892307   | 23 | 114605041 G            | 29 | 4 T   | 0.000003453 |
| rs1016237   | 23 | 114608863 T            | 29 | 4 C   | 0.000003453 |
| rs12014903  | 23 | 114611273 A            | 29 | 4 C   | 0.000003453 |
| rs139564840 | 23 | 114611882 C            | 29 | 4 T   | 0.000003453 |
| rs73580071  | 23 | 114612927 T            | 29 | 4 C   | 0.000003453 |
| rs141250214 | 23 | 114616333 C            | 29 | 4 G   | 0.000003453 |
| rs73580080  | 23 | 114620385 A            | 29 | 6 G   | 0.00004398  |
| rs73580081  | 23 | 114620414 A            | 29 | 6 G   | 0.00004398  |
| rs73580092  | 23 | 114625847 T            | 29 | 6 C   | 0.00004398  |
| rs2006034   | 23 | 114628701 T            | 28 | 6 G   | 0.00008463  |
| rs112265590 | 23 | 114631322 C            | 28 | 6 T   | 0.00008463  |
| rs7878205   | 23 | 114633517 A            | 28 | 6 G   | 0.00008463  |
| rs17260670  | 23 | 114634535 C            | 28 | 6 T   | 0.00008463  |
| rs28380553  | 23 | 114634849 T            | 29 | 6 G   | 0.00004398  |
| rs7892164   | 23 | 114635033 C            | 0  | 9 T   | 0.0009641   |
| rs142179773 | 23 | 114636247 TTTCACATTTCA | 28 | 6 T   | 0.00008463  |
| rs147550727 | 23 | 114637088 C            | 28 | 6 T   | 0.00008463  |
| rs111670357 | 23 | 114637227 C            | 29 | 6 T   | 0.00004398  |
| rs17260677  | 23 | 114637278 A            | 29 | 6 G   | 0.00004398  |
| X:114638348 | 23 | 114638348 T            | 18 | 2 C   | 0.0005323   |
| X:114638352 | 23 | 114638352 T            | 18 | 2 C   | 0.0004916   |
| X:114638353 | 23 | 114638353 G            | 18 | 2 A   | 0.0005323   |
| X:114638356 | 23 | 114638356 C            | 18 | 2 CCT | 0.0004797   |

|             |    |                |    |      |             |
|-------------|----|----------------|----|------|-------------|
| X:114638361 | 23 | 114638361 G    | 18 | 2 A  | 0.0002374   |
| rs113966797 | 23 | 114640655 C    | 29 | 6 T  | 0.00004398  |
| rs4911820   | 23 | 114641418 T    | 30 | 6 C  | 0.00002254  |
| rs140286738 | 23 | 114644640 A    | 0  | 9 T  | 0.0009641   |
| rs17326548  | 23 | 114644730 C    | 29 | 6 G  | 0.00004398  |
| rs4911821   | 23 | 114645027 T    | 30 | 6 C  | 0.00002254  |
| rs17326555  | 23 | 114646245 G    | 39 | 14 C | 0.0002137   |
| rs73571764  | 23 | 114648195 C    | 35 | 8 A  | 0.000007387 |
| rs7066718   | 23 | 114649607 C    | 35 | 8 T  | 0.000007387 |
| rs73571769  | 23 | 114650999 T    | 39 | 14 C | 0.0002137   |
| rs17326562  | 23 | 114652834 C    | 39 | 14 A | 0.0002137   |
| rs73571773  | 23 | 114654595 G    | 31 | 8 A  | 0.0000853   |
| rs199853590 | 23 | 114654636 AT   | 30 | 8 A  | 0.00008574  |
| rs7062146   | 23 | 114656318 G    | 35 | 8 A  | 0.000007387 |
| rs7060823   | 23 | 114656498 A    | 35 | 8 G  | 0.000007387 |
| rs17326576  | 23 | 114657155 C    | 34 | 8 T  | 0.0000145   |
| rs5987730   | 23 | 114657188 A    | 47 | 22 G | 0.0008379   |
| rs2207050   | 23 | 114657765 G    | 35 | 8 C  | 0.000007387 |
| X:114658165 | 23 | 114658165 CTT  | 30 | 8 C  | 0.0001532   |
| rs7888906   | 23 | 114658545 T    | 35 | 6 C  | 0.000001303 |
| rs112844284 | 23 | 114659292 A    | 34 | 8 T  | 0.0000145   |
| rs73571785  | 23 | 114659368 A    | 34 | 8 G  | 0.0000145   |
| rs60895005  | 23 | 114659427 A    | 35 | 8 G  | 0.000007387 |
| rs926705    | 23 | 114659687 G    | 35 | 8 A  | 0.000007387 |
| rs926707    | 23 | 114659994 A    | 35 | 8 G  | 0.000007387 |
| rs73571789  | 23 | 114660377 G    | 35 | 6 A  | 0.000001303 |
| rs113729077 | 23 | 114662377 A    | 35 | 8 T  | 0.000007387 |
| rs73571793  | 23 | 114663073 G    | 34 | 8 A  | 0.0000145   |
| rs17326583  | 23 | 114663116 T    | 34 | 8 C  | 0.0000145   |
| rs7883426   | 23 | 114663960 G    | 34 | 8 A  | 0.0000145   |
| rs7887546   | 23 | 114664241 C    | 34 | 8 T  | 0.0000145   |
| rs73571802  | 23 | 114665460 C    | 34 | 8 A  | 0.0000145   |
| rs17260719  | 23 | 114665861 A    | 35 | 8 G  | 0.000007387 |
| rs73573605  | 23 | 114665905 A    | 34 | 8 G  | 0.0000145   |
| rs17260733  | 23 | 114667356 C    | 34 | 8 T  | 0.0000145   |
| rs7881695   | 23 | 114667505 G    | 34 | 8 A  | 0.0000145   |
| rs113970892 | 23 | 114669417 A    | 34 | 8 T  | 0.0000145   |
| rs111336133 | 23 | 114669445 A    | 34 | 8 G  | 0.0000145   |
| rs111499908 | 23 | 114669468 T    | 35 | 8 C  | 0.000007387 |
| rs150111707 | 23 | 114669633 TACA | 34 | 8 T  | 0.0000145   |
| rs12353835  | 23 | 114670923 G    | 35 | 8 A  | 0.000007387 |

|             |    |               |    |      |             |
|-------------|----|---------------|----|------|-------------|
| rs5987899   | 23 | 114671863 G   | 34 | 8 C  | 0.0000145   |
| rs73573616  | 23 | 114672632 C   | 35 | 8 G  | 0.000007387 |
| rs2143820   | 23 | 114673248 A   | 35 | 8 G  | 0.000007387 |
| rs73573621  | 23 | 114676324 C   | 35 | 8 T  | 0.000007387 |
| rs6655312   | 23 | 114679180 C   | 35 | 8 T  | 0.000007387 |
| rs6655314   | 23 | 114679870 G   | 35 | 8 C  | 0.000007387 |
| rs17326632  | 23 | 114680418 A   | 33 | 8 G  | 0.00002805  |
| rs111228309 | 23 | 114681030 C   | 32 | 8 T  | 0.00005347  |
| rs4911824   | 23 | 114681792 T   | 33 | 8 G  | 0.00002805  |
| rs6655289   | 23 | 114685636 G   | 33 | 8 T  | 0.00002805  |
| rs112042949 | 23 | 114686065 A   | 33 | 8 G  | 0.00002805  |
| rs149609113 | 23 | 114686458 TAG | 32 | 8 T  | 0.00005347  |
| rs113431943 | 23 | 114687392 C   | 32 | 8 T  | 0.00005347  |
| rs17260747  | 23 | 114688227 A   | 33 | 8 G  | 0.00002805  |
| rs6655291   | 23 | 114689103 C   | 33 | 8 T  | 0.00002805  |
| rs6655316   | 23 | 114689468 A   | 32 | 10 C | 0.0003432   |
| rs17260768  | 23 | 114691582 T   | 34 | 9 C  | 0.00007119  |
| rs17326639  | 23 | 114692806 C   | 34 | 9 G  | 0.00004073  |
| rs112847071 | 23 | 114692966 T   | 34 | 9 A  | 0.00004073  |
| rs17326646  | 23 | 114693883 C   | 34 | 9 A  | 0.00004073  |
| rs7881439   | 23 | 114695348 G   | 34 | 11 C | 0.0003893   |
| rs17326660  | 23 | 114695671 T   | 34 | 9 C  | 0.00004073  |
| rs2398577   | 23 | 114697220 C   | 33 | 9 G  | 0.00007642  |
| rs5987903   | 23 | 114698458 G   | 51 | 23 A | 0.0002672   |
| rs111334138 | 23 | 114700313 G   | 47 | 21 C | 0.0004002   |
| rs17260796  | 23 | 114700937 C   | 34 | 9 T  | 0.00004073  |
| rs17260803  | 23 | 114702183 G   | 34 | 9 A  | 0.00004073  |
| rs112659073 | 23 | 114702395 C   | 34 | 9 T  | 0.00004073  |
| rs112990400 | 23 | 114702495 A   | 51 | 25 G | 0.0005636   |
| rs7064642   | 23 | 114702517 G   | 51 | 25 A | 0.0005636   |
| rs2398578   | 23 | 114704901 T   | 33 | 9 C  | 0.00007642  |
| rs1883921   | 23 | 114706218 C   | 49 | 23 G | 0.0005083   |
| rs2398579   | 23 | 114706602 C   | 51 | 25 A | 0.0005636   |
| rs5987736   | 23 | 114709751 C   | 52 | 26 T | 0.0005884   |
| rs5987907   | 23 | 114709810 C   | 52 | 26 T | 0.0005884   |
| rs9887298   | 23 | 114710194 C   | 52 | 26 T | 0.0005884   |
| rs112561107 | 23 | 114710567 A   | 35 | 9 G  | 0.00003581  |
| rs5987737   | 23 | 114710721 C   | 52 | 26 T | 0.0005884   |
| rs7050301   | 23 | 114712096 A   | 35 | 9 G  | 0.00003581  |
| rs111255211 | 23 | 114712752 T   | 35 | 9 G  | 0.00003745  |
| rs5987913   | 23 | 114713957 T   | 39 | 11 A | 0.00001648  |

|             |    |             |    |       |             |
|-------------|----|-------------|----|-------|-------------|
| rs5987914   | 23 | 114713960 A | 39 | 11 G  | 0.00001648  |
| rs28613559  | 23 | 114716113 A | 35 | 9 C   | 0.00003581  |
| rs5987916   | 23 | 114717392 G | 35 | 9 A   | 0.00003581  |
| rs5987917   | 23 | 114717439 A | 35 | 9 G   | 0.00003581  |
| rs2223825   | 23 | 114718982 G | 39 | 11 A  | 0.00001648  |
| rs113944167 | 23 | 114719389 A | 34 | 7 G   | 0.000008931 |
| rs5987919   | 23 | 114720046 C | 39 | 11 T  | 0.00001648  |
| rs7878501   | 23 | 114720306 A | 39 | 11 T  | 0.00001648  |
| rs12391829  | 23 | 114720420 T | 35 | 9 C   | 0.00003581  |
| rs111949579 | 23 | 114721673 A | 35 | 9 G   | 0.00003581  |
| rs2207046   | 23 | 114721793 G | 39 | 11 A  | 0.00001648  |
| rs371553866 | 23 | 114721822 C | 38 | 9 CA  | 0.000004482 |
| rs2207047   | 23 | 114721835 T | 38 | 9 C   | 0.000004482 |
| rs2207048   | 23 | 114722177 T | 38 | 9 C   | 0.000004482 |
| rs59067332  | 23 | 114723192 C | 39 | 9 T   | 0.000002168 |
| rs73577794  | 23 | 114724262 T | 37 | 9 G   | 0.000004114 |
| rs113480467 | 23 | 114724357 G | 33 | 9 A   | 0.00006226  |
| rs73577800  | 23 | 114725164 A | 39 | 9 G   | 0.000002168 |
| rs2398580   | 23 | 114725828 G | 39 | 11 A  | 0.00001648  |
| rs2895154   | 23 | 114725960 G | 38 | 9 T   | 0.000004482 |
| rs9887208   | 23 | 114726150 T | 32 | 7 C   | 0.00001751  |
| rs6655319   | 23 | 114726212 T | 39 | 11 A  | 0.00001648  |
| rs139261717 | 23 | 114727944 C | 35 | 9 CA  | 0.00003581  |
| rs5987742   | 23 | 114728259 C | 39 | 11 T  | 0.00001648  |
| rs113110371 | 23 | 114729165 G | 35 | 9 A   | 0.00003581  |
| rs12393386  | 23 | 114729654 G | 32 | 9 T   | 0.0001178   |
| rs4911827   | 23 | 114731229 G | 34 | 12 T  | 0.000839    |
| rs61525850  | 23 | 114731984 A | 34 | 11 C  | 0.0003893   |
| rs9724449   | 23 | 115020940 C | 40 | 15 T  | 0.0002535   |
| rs75819721  | 23 | 115643799 C | 1  | 17 CT | 0.00001859  |
| rs78300430  | 23 | 115648351 C | 2  | 19 G  | 0.00002464  |
| rs149087657 | 23 | 115648862 A | 2  | 17 G  | 0.0001162   |
| rs5905207   | 23 | 115653462 T | 1  | 17 C  | 0.00001632  |
| rs6608524   | 23 | 115654928 A | 1  | 17 G  | 0.00001632  |
| rs988456    | 23 | 115659164 A | 52 | 24 G  | 0.0001653   |
| rs139721366 | 23 | 115661289 T | 52 | 24 G  | 0.0001653   |
| rs1013220   | 23 | 115662445 T | 52 | 24 C  | 0.0001653   |
| rs5905338   | 23 | 115663534 T | 52 | 24 C  | 0.0001653   |
| rs5905342   | 23 | 115664640 G | 52 | 24 A  | 0.0001653   |
| rs6651577   | 23 | 115665691 G | 52 | 24 A  | 0.0001653   |
| rs5905343   | 23 | 115666144 C | 52 | 24 T  | 0.0001653   |

|             |    |                         |    |        |            |
|-------------|----|-------------------------|----|--------|------------|
| rs5905211   | 23 | 115666246 T             | 52 | 24 C   | 0.0001653  |
| rs5905346   | 23 | 115667761 T             | 52 | 24 C   | 0.0001653  |
| rs6608698   | 23 | 115668322 C             | 52 | 24 T   | 0.0001653  |
| rs6608699   | 23 | 115669288 G             | 52 | 24 A   | 0.0001653  |
| rs4145420   | 23 | 115670754 G             | 52 | 24 A   | 0.0001653  |
| rs6608527   | 23 | 115670779 C             | 52 | 24 G   | 0.0001653  |
| rs4145421   | 23 | 115670837 A             | 42 | 18 G   | 0.0006782  |
| rs5905347   | 23 | 115671758 T             | 52 | 21 C   | 0.00003499 |
| X:115672688 | 23 | 115672688 T             | 52 | 24 TTC | 0.0001653  |
| X:115672692 | 23 | 115672692 CAAATTAGAG    | 52 | 24 C   | 0.0001653  |
| X:115672695 | 23 | 115672695 TGACAAATTGACA | 52 | 24 T   | 0.0001653  |
| rs2187881   | 23 | 115673376 T             | 52 | 24 A   | 0.0001653  |
| rs2157427   | 23 | 115673454 G             | 51 | 22 A   | 0.0001366  |
| rs5905348   | 23 | 115675146 T             | 52 | 24 C   | 0.0001653  |
| rs11260159  | 23 | 115734350 T             | 52 | 24 C   | 0.0001653  |
| rs9723899   | 23 | 115740720 C             | 23 | 44 G   | 0.0001337  |
| rs9724300   | 23 | 115740847 G             | 23 | 44 C   | 0.00006607 |
| rs9329406   | 23 | 115740985 A             | 26 | 48 G   | 0.000078   |
| rs9780253   | 23 | 115741598 C             | 52 | 22 A   | 0.00004088 |
| rs12390117  | 23 | 115743813 G             | 52 | 22 A   | 0.00004088 |
| rs11260106  | 23 | 115744144 C             | 52 | 22 T   | 0.00004088 |
| rs11260118  | 23 | 115744897 C             | 52 | 22 T   | 0.00004088 |
| rs11260121  | 23 | 115745642 C             | 52 | 22 T   | 0.00004088 |
| rs6655546   | 23 | 115747311 T             | 52 | 22 C   | 0.00004088 |
| rs11260135  | 23 | 115747885 G             | 52 | 22 A   | 0.00004088 |
| rs112534898 | 23 | 115747924 G             | 52 | 22 GAT | 0.00004088 |
| rs12834189  | 23 | 115748233 A             | 52 | 22 G   | 0.00004088 |
| rs12837027  | 23 | 115748364 C             | 52 | 22 T   | 0.00004088 |
| rs200565252 | 23 | 115749377 G             | 52 | 22 GA  | 0.00004088 |
| rs11260148  | 23 | 115749542 C             | 52 | 22 A   | 0.00004088 |
| rs11260149  | 23 | 115749593 A             | 52 | 22 C   | 0.00004088 |
| rs11260150  | 23 | 115749818 G             | 52 | 22 A   | 0.00004088 |
| rs11260151  | 23 | 115749920 A             | 52 | 22 G   | 0.00004088 |
| rs12398681  | 23 | 115750080 C             | 52 | 22 T   | 0.00004088 |
| rs12398711  | 23 | 115750294 G             | 52 | 22 T   | 0.00004088 |
| rs12400117  | 23 | 115750388 T             | 42 | 18 C   | 0.0006782  |
| rs28441538  | 23 | 115750497 A             | 31 | 52 G   | 0.00009769 |
| rs66834529  | 23 | 115751442 C             | 52 | 22 T   | 0.00004088 |
| rs73226865  | 23 | 115751478 A             | 52 | 22 T   | 0.00004088 |
| rs11260156  | 23 | 115752193 A             | 52 | 22 T   | 0.00004088 |
| rs12389361  | 23 | 115752510 A             | 23 | 44 T   | 0.0001337  |

|             |    |              |    |          |             |
|-------------|----|--------------|----|----------|-------------|
| rs12398615  | 23 | 115752926 T  | 52 | 22 C     | 0.00004088  |
| rs10907033  | 23 | 115753053 G  | 52 | 22 A     | 0.00004088  |
| rs10907034  | 23 | 115753283 G  | 52 | 22 C     | 0.00004088  |
| rs10907035  | 23 | 115753330 A  | 52 | 22 G     | 0.00004088  |
| rs10796347  | 23 | 115753621 C  | 52 | 22 T     | 0.00004088  |
| rs11260172  | 23 | 115755324 C  | 54 | 23 T     | 0.00004033  |
| rs12400026  | 23 | 115755656 A  | 31 | 52 T     | 0.00009769  |
| rs12557454  | 23 | 115756177 T  | 31 | 52 C     | 0.00009769  |
| rs74574712  | 23 | 115756248 TA | 31 | 52 T     | 0.00009769  |
| rs73213286  | 23 | 115756372 C  | 31 | 52 A     | 0.00009769  |
| rs12398361  | 23 | 115757430 G  | 20 | 39 A     | 0.0005694   |
| rs6603394   | 23 | 115757476 G  | 44 | 17 A     | 0.000106    |
| rs12400045  | 23 | 115758626 A  | 20 | 39 G     | 0.0005694   |
| rs7059336   | 23 | 115762843 T  | 52 | 23 C     | 0.00008358  |
| rs7049926   | 23 | 115762854 A  | 52 | 23 G     | 0.00008358  |
| rs12835373  | 23 | 115764107 C  | 20 | 39 T     | 0.0005694   |
| rs12853107  | 23 | 115764937 C  | 54 | 23 T     | 0.00002242  |
| rs7473283   | 23 | 115766722 A  | 13 | 30 T     | 0.0007578   |
| rs10658209  | 23 | 115769642 G  | 52 | 23 GAT   | 0.00008358  |
| rs7473627   | 23 | 115774190 T  | 12 | 30 C     | 0.0005652   |
| rs7391967   | 23 | 115774556 A  | 12 | 30 G     | 0.0005652   |
| rs7391753   | 23 | 115774601 T  | 54 | 23 C     | 0.00002242  |
| rs12398148  | 23 | 115778720 A  | 12 | 30 C     | 0.0005652   |
| rs12847918  | 23 | 115780825 A  | 12 | 30 G     | 0.0005652   |
| rs12853855  | 23 | 115780844 T  | 12 | 30 C     | 0.0005652   |
| rs12559419  | 23 | 115781639 C  | 24 | 46 T     | 0.0000732   |
| rs12395694  | 23 | 115781926 C  | 24 | 47 T     | 0.00003747  |
| rs199692781 | 23 | 115782112 T  | 26 | 46 TAATA | 0.000277    |
| rs62605741  | 23 | 115782964 C  | 25 | 46 T     | 0.0001445   |
| rs12398468  | 23 | 115784630 T  | 24 | 46 C     | 0.0000732   |
| rs11260345  | 23 | 115786229 G  | 25 | 47 T     | 0.00007582  |
| rs12395202  | 23 | 115786761 T  | 52 | 23 C     | 0.00008358  |
| rs5910167   | 23 | 115787601 T  | 25 | 46 G     | 0.0001445   |
| rs5910166   | 23 | 115787761 A  | 24 | 46 G     | 0.0000732   |
| rs5912057   | 23 | 115788011 G  | 24 | 46 C     | 0.0000732   |
| rs34307386  | 23 | 115788942 A  | 24 | 47 G     | 0.00003747  |
| rs5912030   | 23 | 115792853 A  | 54 | 23 G     | 0.00002242  |
| rs5912025   | 23 | 115794587 A  | 44 | 17 G     | 0.000106    |
| rs7057172   | 23 | 115797756 A  | 56 | 23 G     | 0.000005473 |
| rs1506960   | 23 | 115798129 T  | 56 | 23 C     | 0.000005473 |
| rs5956740   | 23 | 115799907 C  | 56 | 23 G     | 0.000005473 |

|             |    |              |    |          |             |
|-------------|----|--------------|----|----------|-------------|
| rs369934843 | 23 | 115801212 C  | 12 | 28 CACAG | 0.000945    |
| rs1506958   | 23 | 115803356 C  | 20 | 38 T     | 0.0009963   |
| rs5903481   | 23 | 115803731 T  | 46 | 17 TTATC | 0.00004936  |
| rs113858028 | 23 | 115806047 A  | 46 | 17 ATGT  | 0.00004936  |
| rs5911731   | 23 | 115807323 T  | 56 | 23 C     | 0.000005473 |
| rs1395554   | 23 | 115808095 T  | 20 | 38 G     | 0.0009963   |
| rs11798535  | 23 | 115808182 C  | 20 | 38 G     | 0.0009963   |
| rs2878305   | 23 | 115808704 G  | 6  | 21 A     | 0.0006518   |
| rs1354799   | 23 | 115808840 T  | 20 | 38 G     | 0.0009963   |
| rs5911784   | 23 | 115809206 C  | 6  | 21 T     | 0.0006518   |
| rs12395259  | 23 | 115810023 G  | 20 | 38 A     | 0.0009963   |
| rs7473168   | 23 | 115810825 C  | 20 | 38 T     | 0.0009963   |
| rs7473986   | 23 | 115811177 C  | 20 | 38 T     | 0.0009963   |
| rs28581957  | 23 | 115811962 G  | 20 | 38 C     | 0.0009963   |
| rs2335018   | 23 | 115812234 C  | 20 | 38 T     | 0.0009963   |
| rs3965555   | 23 | 115812261 C  | 20 | 38 A     | 0.0009963   |
| rs62607578  | 23 | 115813719 A  | 0  | 10 G     | 0.0004292   |
| rs145375768 | 23 | 115815752 C  | 0  | 10 T     | 0.0004292   |
| rs34339026  | 23 | 115816699 C  | 28 | 51 CT    | 0.00001381  |
| rs5909877   | 23 | 115825960 G  | 48 | 19 A     | 0.00006091  |
| rs1876296   | 23 | 115827591 C  | 48 | 19 G     | 0.00006091  |
| rs141519037 | 23 | 116465087 G  | 3  | 16 A     | 0.0009912   |
| rs150999575 | 23 | 116746900 A  | 0  | 10 C     | 0.0004292   |
| rs143312856 | 23 | 116853186 A  | 0  | 10 G     | 0.0004292   |
| rs2211053   | 23 | 116981307 G  | 13 | 31 A     | 0.0004205   |
| rs2211052   | 23 | 116981350 C  | 15 | 35 G     | 0.0001708   |
| rs139564216 | 23 | 117401280 A  | 12 | 0 G      | 0.0003752   |
| rs438070    | 23 | 118625275 T  | 2  | 15 C     | 0.0004445   |
| rs5909632   | 23 | 118664198 A  | 2  | 15 G     | 0.0004755   |
| rs66593950  | 23 | 118732119 AT | 14 | 33 A     | 0.0002272   |
| rs802801    | 23 | 118734993 G  | 14 | 31 A     | 0.0007479   |
| rs143566226 | 23 | 118798931 A  | 0  | 9 G      | 0.0009641   |
| rs5957481   | 23 | 119916327 G  | 27 | 45 A     | 0.0009136   |
| rs11314157  | 23 | 119917765 T  | 43 | 16 TA    | 0.00009051  |
| rs5909763   | 23 | 119918392 G  | 43 | 16 A     | 0.00009051  |
| rs5957482   | 23 | 119918735 G  | 43 | 16 T     | 0.00009051  |
| rs5909764   | 23 | 119919126 A  | 43 | 16 C     | 0.00009051  |
| rs5911426   | 23 | 121954639 T  | 42 | 14 G     | 0.0000334   |
| rs5909997   | 23 | 122497307 A  | 9  | 25 T     | 0.0008942   |
| rs34786936  | 23 | 122573644 C  | 3  | 17 CT    | 0.0005721   |
| rs62607674  | 23 | 122595313 C  | 39 | 16 T     | 0.0009032   |

|             |    |               |    |       |            |
|-------------|----|---------------|----|-------|------------|
| rs138621790 | 23 | 124622472 A   | 0  | 9 C   | 0.0009641  |
| rs34260006  | 23 | 130480304 TAC | 8  | 25 T  | 0.0003633  |
| rs2073051   | 23 | 132473645 A   | 11 | 33 G  | 0.0000209  |
| rs73572505  | 23 | 132550175 T   | 29 | 7 C   | 0.0002463  |
| rs7059265   | 23 | 132550737 A   | 29 | 7 G   | 0.0001288  |
| rs1546971   | 23 | 132554875 G   | 29 | 7 T   | 0.0001288  |
| rs7881013   | 23 | 132554944 G   | 29 | 7 A   | 0.0001288  |
| rs1546972   | 23 | 132554979 G   | 29 | 7 A   | 0.0001288  |
| rs61405540  | 23 | 132557734 A   | 29 | 7 G   | 0.0001288  |
| rs60806152  | 23 | 132557796 G   | 29 | 8 A   | 0.0003391  |
| rs7878767   | 23 | 132558500 T   | 26 | 7 C   | 0.0003762  |
| rs58213637  | 23 | 132558797 A   | 29 | 7 G   | 0.0001288  |
| rs7887463   | 23 | 132559557 T   | 29 | 7 A   | 0.0001288  |
| rs73572523  | 23 | 132561047 T   | 29 | 7 C   | 0.0001288  |
| rs16993046  | 23 | 132561090 T   | 29 | 7 A   | 0.0001288  |
| rs17000449  | 23 | 132561910 G   | 29 | 7 T   | 0.0001288  |
| rs58666909  | 23 | 132562165 C   | 29 | 7 A   | 0.0001288  |
| rs7876869   | 23 | 132562762 C   | 29 | 7 A   | 0.0001288  |
| rs7877025   | 23 | 132562894 T   | 24 | 6 A   | 0.0004924  |
| rs67231548  | 23 | 133624531 GTA | 51 | 25 G  | 0.0005636  |
| rs75369405  | 23 | 133722328 AT  | 17 | 2 A   | 0.0004125  |
| rs5975654   | 23 | 135134722 G   | 15 | 1 T   | 0.0003544  |
| rs2518896   | 23 | 135679053 A   | 20 | 4 G   | 0.0007853  |
| rs2518897   | 23 | 135679059 A   | 20 | 4 G   | 0.0007853  |
| rs2518904   | 23 | 135681823 A   | 20 | 2 G   | 0.0001287  |
| rs141954229 | 23 | 138074269 CAT | 2  | 14 C  | 0.0009649  |
| rs518667    | 23 | 138077510 C   | 0  | 13 T  | 0.00003603 |
| rs78974273  | 23 | 138079591 A   | 0  | 13 AC | 0.00003603 |
| rs579260    | 23 | 138086137 T   | 0  | 13 C  | 0.00003603 |
| rs471635    | 23 | 138086434 A   | 0  | 13 C  | 0.00004253 |
| rs500096    | 23 | 138087155 G   | 0  | 13 C  | 0.00003603 |
| rs565127    | 23 | 138088701 C   | 0  | 13 T  | 0.00003603 |
| rs472273    | 23 | 138097159 G   | 0  | 13 C  | 0.00003603 |
| rs2179589   | 23 | 138097310 G   | 0  | 13 A  | 0.00003603 |
| rs566187    | 23 | 138098674 A   | 0  | 13 T  | 0.00003603 |
| rs496732    | 23 | 138099648 T   | 0  | 13 C  | 0.00002946 |
| rs490787    | 23 | 138100179 G   | 0  | 13 A  | 0.00003603 |
| rs512809    | 23 | 138101612 C   | 0  | 13 A  | 0.00002946 |
| rs471600    | 23 | 138101814 G   | 0  | 13 A  | 0.00003603 |
| rs482328    | 23 | 138102649 C   | 0  | 13 T  | 0.00003603 |
| rs483419    | 23 | 138105978 C   | 0  | 13 T  | 0.00003603 |



|             |    |              |   |               |            |
|-------------|----|--------------|---|---------------|------------|
| rs497635    | 23 | 138106122 T  | 0 | 13 G          | 0.00003603 |
| rs578264    | 23 | 138107101 C  | 0 | 13 T          | 0.00003603 |
| rs515444    | 23 | 138107138 G  | 0 | 13 A          | 0.00003603 |
| rs519841    | 23 | 138108803 C  | 0 | 13 T          | 0.00003603 |
| rs149173046 | 23 | 138110078 C  | 0 | 13 CAAGA      | 0.00003603 |
| rs693310    | 23 | 138110176 C  | 0 | 13 T          | 0.00003603 |
| rs5931560   | 23 | 138110307 A  | 0 | 13 G          | 0.00003603 |
| rs526093    | 23 | 138111126 G  | 0 | 13 A          | 0.00003603 |
| rs477821    | 23 | 138111932 A  | 0 | 13 G          | 0.00003603 |
| rs6635762   | 23 | 138113107 A  | 0 | 13 G          | 0.00003603 |
| rs67703366  | 23 | 138113374 CA | 0 | 13 C          | 0.00003603 |
| rs79440397  | 23 | 138113382 A  | 0 | 13 T          | 0.00003603 |
| rs6634041   | 23 | 138113909 C  | 0 | 11 A          | 0.0001604  |
| rs17001950  | 23 | 138114091 G  | 0 | 13 C          | 0.00003603 |
| rs60643249  | 23 | 138114217 A  | 0 | 13 G          | 0.00003603 |
| rs62602197  | 23 | 138114331 A  | 0 | 13 G          | 0.00003603 |
| rs61245857  | 23 | 138114383 G  | 0 | 13 A          | 0.00003603 |
| rs6634042   | 23 | 138114720 C  | 0 | 13 A          | 0.00003603 |
| rs7884030   | 23 | 138115512 C  | 0 | 13 T          | 0.00003603 |
| rs7883424   | 23 | 138115569 A  | 0 | 13 G          | 0.00003603 |
| rs17001957  | 23 | 138116229 C  | 0 | 13 A          | 0.00003603 |
| rs62602201  | 23 | 138116536 A  | 0 | 13 G          | 0.00003603 |
| rs62602202  | 23 | 138117015 C  | 0 | 13 T          | 0.00003603 |
| rs16993529  | 23 | 138117256 T  | 0 | 13 C          | 0.00003603 |
| rs10521792  | 23 | 138117409 G  | 0 | 13 A          | 0.00003603 |
| rs17001960  | 23 | 138119216 A  | 0 | 13 T          | 0.00003603 |
| rs62602203  | 23 | 138119644 C  | 0 | 13 A          | 0.00003603 |
| rs62602204  | 23 | 138119702 A  | 0 | 13 T          | 0.00003603 |
| rs112015472 | 23 | 138119748 A  | 0 | 13 T          | 0.00003603 |
| rs7889036   | 23 | 138119874 T  | 0 | 13 A          | 0.00003603 |
| rs62602205  | 23 | 138120458 A  | 0 | 13 G          | 0.00002946 |
| rs12558011  | 23 | 138120702 T  | 0 | 13 A          | 0.00003603 |
| rs12556537  | 23 | 138120938 C  | 0 | 13 T          | 0.00003603 |
| rs17001963  | 23 | 138122394 T  | 0 | 13 G          | 0.00003603 |
| rs62602208  | 23 | 138126601 C  | 0 | 13 A          | 0.00003603 |
| rs62602209  | 23 | 138127036 G  | 0 | 13 A          | 0.00003603 |
| rs2103610   | 23 | 138127481 A  | 0 | 13 G          | 0.00003603 |
| rs112592286 | 23 | 138128310 C  | 0 | 13 CCTCAGGAAG | 0.00003603 |
| rs62602236  | 23 | 138128358 A  | 0 | 13 G          | 0.00003603 |
| rs12560172  | 23 | 138130418 C  | 0 | 13 T          | 0.00003603 |
| rs62602238  | 23 | 138130921 C  | 0 | 13 T          | 0.00003603 |

|             |    |              |   |         |            |
|-------------|----|--------------|---|---------|------------|
| rs62602239  | 23 | 138133918 G  | 0 | 13 T    | 0.00003603 |
| rs62602240  | 23 | 138134536 G  | 0 | 13 A    | 0.00003603 |
| rs62602241  | 23 | 138134795 T  | 0 | 13 C    | 0.00003603 |
| rs1080166   | 23 | 138137774 C  | 0 | 13 T    | 0.00003603 |
| rs62602242  | 23 | 138140150 C  | 0 | 13 T    | 0.00003603 |
| rs7877464   | 23 | 138140408 G  | 0 | 13 A    | 0.00003603 |
| rs12556549  | 23 | 138140736 T  | 0 | 13 G    | 0.00003603 |
| rs62602243  | 23 | 138142110 A  | 0 | 13 G    | 0.00003603 |
| rs374366794 | 23 | 138143770 A  | 0 | 13 AT   | 0.00003603 |
| rs113373639 | 23 | 138144111 C  | 0 | 13 CTTA | 0.00003603 |
| rs143453100 | 23 | 138147525 C  | 0 | 12 T    | 0.00008299 |
| rs62602246  | 23 | 138148857 A  | 0 | 12 G    | 0.00008299 |
| rs62602247  | 23 | 138150491 C  | 0 | 10 T    | 0.0003694  |
| rs138951453 | 23 | 138152160 C  | 0 | 13 T    | 0.00003603 |
| rs141403534 | 23 | 138152804 A  | 0 | 12 G    | 0.00008299 |
| rs147006243 | 23 | 138152877 T  | 0 | 12 C    | 0.00008299 |
| rs112600886 | 23 | 138154239 A  | 0 | 13 G    | 0.00003603 |
| rs112886945 | 23 | 138155295 T  | 0 | 12 TC   | 0.00008299 |
| rs201924524 | 23 | 138155299 G  | 0 | 12 C    | 0.00008299 |
| rs10521793  | 23 | 138156505 T  | 0 | 12 C    | 0.00008299 |
| rs17284663  | 23 | 138160456 T  | 0 | 12 A    | 0.00008299 |
| rs17331408  | 23 | 138160576 C  | 0 | 12 T    | 0.00008299 |
| rs112249167 | 23 | 138161557 A  | 0 | 12 AC   | 0.00008299 |
| rs62603179  | 23 | 138166155 G  | 0 | 13 A    | 0.00003603 |
| rs62603180  | 23 | 138177022 T  | 0 | 13 C    | 0.00003603 |
| rs7890667   | 23 | 138178531 A  | 0 | 12 G    | 0.00008299 |
| rs62603183  | 23 | 138179958 G  | 0 | 12 C    | 0.00008299 |
| rs111506647 | 23 | 138181040 C  | 0 | 12 T    | 0.00008299 |
| rs7884308   | 23 | 138182426 A  | 0 | 12 G    | 0.00008299 |
| rs7888266   | 23 | 138182784 T  | 0 | 12 G    | 0.00008299 |
| rs62603185  | 23 | 138183067 G  | 0 | 13 A    | 0.00004253 |
| rs2206125   | 23 | 138185215 T  | 0 | 12 C    | 0.00008299 |
| rs111519164 | 23 | 138185531 A  | 0 | 12 G    | 0.00008299 |
| rs17001986  | 23 | 138186360 C  | 0 | 12 G    | 0.00008299 |
| rs62603187  | 23 | 138186858 T  | 0 | 12 C    | 0.00008299 |
| rs199795206 | 23 | 138187174 GT | 0 | 11 G    | 0.0001604  |
| rs17331422  | 23 | 138187934 G  | 0 | 13 A    | 0.00003603 |
| rs979128    | 23 | 138188114 C  | 0 | 13 A    | 0.00003603 |
| rs41300307  | 23 | 138188496 A  | 0 | 12 G    | 0.00008299 |
| rs201138057 | 23 | 138189171 C  | 0 | 10 CT   | 0.0004292  |
| rs200196785 | 23 | 138189174 A  | 0 | 10 T    | 0.0004292  |

|             |    |                 |    |                |            |
|-------------|----|-----------------|----|----------------|------------|
| rs2227059   | 23 | 138236904 C     | 25 | 47 T           | 0.00007582 |
| rs2301396   | 23 | 138237094 G     | 25 | 44 C           | 0.000488   |
| rs5908770   | 23 | 138650817 G     | 30 | 48 T           | 0.0009571  |
| rs60497947  | 23 | 140234395 G     | 23 | 3 A            | 0.00006268 |
| rs57432891  | 23 | 140234396 G     | 23 | 3 T            | 0.00006268 |
| rs5908121   | 23 | 141160597 T     | 52 | 23 A           | 0.00008358 |
| rs6634356   | 23 | 141164624 C     | 52 | 23 T           | 0.00008358 |
| rs4825078   | 23 | 141167942 A     | 45 | 16 G           | 0.00002569 |
| rs4825079   | 23 | 141168086 G     | 45 | 16 A           | 0.00002569 |
| rs5908132   | 23 | 141168290 T     | 45 | 18 C           | 0.0001933  |
| rs2142969   | 23 | 141168655 G     | 50 | 25 C           | 0.0009811  |
| rs2179314   | 23 | 141168805 G     | 50 | 25 A           | 0.0009811  |
| rs2869073   | 23 | 141168838 T     | 50 | 24 A           | 0.0005368  |
| rs2903999   | 23 | 141169274 T     | 50 | 24 C           | 0.0005368  |
| rs2869074   | 23 | 141169426 G     | 50 | 24 A           | 0.0005368  |
| rs35894125  | 23 | 141169501 G     | 50 | 24 GA          | 0.0005368  |
| rs2869075   | 23 | 141169550 T     | 50 | 24 A           | 0.0005368  |
| rs5908135   | 23 | 141170987 G     | 50 | 25 C           | 0.0009811  |
| rs67628234  | 23 | 141171171 A     | 50 | 25 G           | 0.0009811  |
| rs1883397   | 23 | 141308325 C     | 13 | 30 T           | 0.0007578  |
| rs62600825  | 23 | 141963178 T     | 29 | 8 C            | 0.0003391  |
| rs2223452   | 23 | 141964914 A     | 32 | 10 G           | 0.0003432  |
| rs5904083   | 23 | 141964932 C     | 32 | 10 CT          | 0.0005752  |
| rs12839812  | 23 | 141965807 A     | 32 | 10 G           | 0.0003432  |
| rs139648084 | 23 | 141976966 T     | 29 | 9 C            | 0.0008145  |
| rs7885118   | 23 | 141978729 A     | 41 | 17 T           | 0.0005984  |
| rs34057690  | 23 | 141982184 CTTGA | 38 | 14 C           | 0.0003829  |
| rs5954986   | 23 | 142336450 G     | 7  | 23 A           | 0.0004919  |
| rs5953936   | 23 | 143308705 C     | 26 | 7 T            | 0.0007902  |
| rs5953941   | 23 | 143325039 T     | 27 | 7 C            | 0.0004381  |
| rs5955281   | 23 | 143330493 T     | 27 | 7 A            | 0.0004381  |
| rs12353807  | 23 | 143330494 T     | 27 | 7 G            | 0.0004381  |
| rs35584131  | 23 | 143333330 TTAAC | 27 | 7 T            | 0.0004381  |
| rs4268240   | 23 | 143333737 G     | 27 | 7 A            | 0.0004381  |
| rs4567183   | 23 | 143333901 C     | 27 | 7 T            | 0.0004381  |
| rs56117640  | 23 | 143643055 A     | 1  | 15 G           | 0.00007965 |
| rs17309667  | 23 | 143644356 T     | 1  | 15 G           | 0.00007965 |
| rs200366744 | 23 | 143657153 T     | 1  | 14 TAAATGCACAC | 0.000173   |
| rs78866384  | 23 | 143663615 C     | 2  | 15 A           | 0.0004755  |
| rs56162924  | 23 | 143688892 T     | 1  | 15 C           | 0.00007965 |
| rs5920461   | 23 | 144294376 C     | 14 | 31 T           | 0.0008795  |

|             |    |                  |    |       |           |
|-------------|----|------------------|----|-------|-----------|
| rs559327    | 23 | 144342646 C      | 17 | 2 T   | 0.000467  |
| rs502750    | 23 | 144344202 C      | 17 | 2 T   | 0.000467  |
| rs7053970   | 23 | 144354539 C      | 17 | 2 T   | 0.000467  |
| rs5920480   | 23 | 144359865 T      | 16 | 2 C   | 0.0008956 |
| rs5919820   | 23 | 144363288 C      | 16 | 2 T   | 0.0008956 |
| rs2125445   | 23 | 144367015 T      | 16 | 2 A   | 0.0008956 |
| rs5965846   | 23 | 144369589 C      | 16 | 2 A   | 0.0008956 |
| rs1337635   | 23 | 144374307 G      | 16 | 2 A   | 0.0008956 |
| rs5919821   | 23 | 144382762 G      | 16 | 2 A   | 0.0008956 |
| rs557943    | 23 | 144384458 G      | 16 | 2 T   | 0.0008956 |
| rs599744    | 23 | 144385068 C      | 16 | 2 A   | 0.0008956 |
| rs1598987   | 23 | 144385268 G      | 16 | 2 A   | 0.0008956 |
| rs5919822   | 23 | 144388647 T      | 17 | 2 C   | 0.000467  |
| rs5919823   | 23 | 144391681 T      | 16 | 2 C   | 0.0008956 |
| rs2210987   | 23 | 144395156 G      | 16 | 2 A   | 0.0008956 |
| rs4454436   | 23 | 144398117 C      | 16 | 2 G   | 0.0008956 |
| rs5920488   | 23 | 144399577 T      | 16 | 2 G   | 0.0008956 |
| rs75123486  | 23 | 144403702 T      | 16 | 2 C   | 0.0008956 |
| rs2152852   | 23 | 144406208 C      | 16 | 2 T   | 0.0008956 |
| rs3076258   | 23 | 144406771 G      | 16 | 2 GTT | 0.0008912 |
| rs1974267   | 23 | 144406924 C      | 17 | 2 T   | 0.000467  |
| X:144407139 | 23 | 144407139 TAC    | 16 | 2 T   | 0.0008956 |
| rs10672257  | 23 | 144407215 C      | 17 | 2 CTG | 0.000467  |
| rs1856207   | 23 | 144407841 A      | 16 | 2 G   | 0.0008956 |
| rs1974266   | 23 | 144408323 G      | 16 | 2 A   | 0.0008956 |
| rs1007647   | 23 | 144408676 A      | 18 | 2 T   | 0.0002092 |
| rs4412509   | 23 | 144413331 C      | 16 | 2 T   | 0.0008956 |
| rs1933046   | 23 | 144414060 T      | 17 | 2 C   | 0.000467  |
| rs144743683 | 23 | 144414309 CTGTT  | 17 | 2 C   | 0.000467  |
| rs1415624   | 23 | 144414774 G      | 16 | 2 T   | 0.0008956 |
| rs5919825   | 23 | 144415315 G      | 16 | 2 T   | 0.0008956 |
| rs200773179 | 23 | 144415343 TTTTTC | 16 | 2 T   | 0.0008956 |
| rs5920489   | 23 | 144416597 A      | 16 | 2 T   | 0.0008912 |
| rs1538163   | 23 | 144417384 A      | 16 | 2 G   | 0.0008956 |
| rs1538162   | 23 | 144418490 G      | 17 | 2 A   | 0.000467  |
| rs1415623   | 23 | 144418846 C      | 16 | 2 T   | 0.0008956 |
| rs5920490   | 23 | 144419479 A      | 16 | 2 G   | 0.0008956 |
| rs375590914 | 23 | 144419769 CA     | 16 | 2 C   | 0.0008956 |
| rs5920491   | 23 | 144420321 C      | 17 | 2 T   | 0.000467  |
| rs5919826   | 23 | 144420383 T      | 16 | 2 C   | 0.0008956 |
| rs5920493   | 23 | 144421254 A      | 16 | 2 G   | 0.0008956 |

|             |    |              |    |                  |            |
|-------------|----|--------------|----|------------------|------------|
| rs5919827   | 23 | 144421257 C  | 16 | 2 T              | 0.0008956  |
| rs111556485 | 23 | 144542821 G  | 17 | 2 A              | 0.000467   |
| rs202237324 | 23 | 144591171 C  | 16 | 2 CAA            | 0.0008956  |
| rs4827662   | 23 | 144915261 G  | 49 | 23 C             | 0.0005083  |
| rs55876683  | 23 | 144961624 G  | 49 | 23 A             | 0.0008445  |
| rs5920019   | 23 | 145229419 C  | 6  | 21 T             | 0.0006518  |
| rs111463228 | 23 | 145391491 G  | 1  | 12 C             | 0.0007887  |
| rs5920113   | 23 | 145550758 T  | 43 | 18 A             | 0.0003905  |
| rs5920114   | 23 | 145551278 C  | 43 | 19 T             | 0.000761   |
| rs5920115   | 23 | 145551928 G  | 43 | 19 T             | 0.000761   |
| rs112929287 | 23 | 145572578 C  | 41 | 17 CACACACACACAC | 0.0005196  |
| rs12853269  | 23 | 145672354 C  | 29 | 9 T              | 0.0008145  |
| rs12855563  | 23 | 145672954 G  | 30 | 9 T              | 0.0004612  |
| rs12855872  | 23 | 145672989 C  | 30 | 9 T              | 0.0004612  |
| rs7889692   | 23 | 147086039 G  | 11 | 0 A              | 0.0007855  |
| rs199528103 | 23 | 147091621 AT | 11 | 0 A              | 0.0007855  |
| rs34993625  | 23 | 147767359 A  | 15 | 1 G              | 0.0003561  |
| rs1882727   | 23 | 148354706 G  | 43 | 19 A             | 0.000761   |
| rs10709019  | 23 | 148354772 TA | 43 | 19 T             | 0.000761   |
| rs2056833   | 23 | 148355171 G  | 43 | 19 A             | 0.000761   |
| rs741733    | 23 | 148355251 C  | 43 | 19 T             | 0.000761   |
| rs760051    | 23 | 148355553 C  | 43 | 19 A             | 0.000761   |
| rs5936253   | 23 | 148358734 C  | 43 | 19 T             | 0.000761   |
| rs5936254   | 23 | 148358760 C  | 43 | 19 T             | 0.000761   |
| rs5936255   | 23 | 148360525 A  | 43 | 19 G             | 0.000761   |
| rs1007084   | 23 | 148361284 A  | 43 | 19 G             | 0.000761   |
| rs373447133 | 23 | 148361579 AT | 43 | 19 A             | 0.000761   |
| rs7051515   | 23 | 148362146 T  | 43 | 19 C             | 0.000761   |
| rs5936256   | 23 | 148362574 T  | 43 | 19 C             | 0.000761   |
| rs5904262   | 23 | 148364087 AG | 43 | 19 A             | 0.000761   |
| rs4844009   | 23 | 148369123 G  | 43 | 19 A             | 0.000761   |
| rs4844010   | 23 | 148369188 C  | 43 | 19 T             | 0.000761   |
| rs5936258   | 23 | 148369607 C  | 43 | 19 T             | 0.000761   |
| rs4581208   | 23 | 148370174 G  | 43 | 17 A             | 0.0003239  |
| rs1882728   | 23 | 148370989 A  | 43 | 19 C             | 0.000761   |
| rs6641287   | 23 | 148372456 C  | 45 | 19 T             | 0.0003833  |
| rs5980471   | 23 | 148553479 A  | 23 | 5 G              | 0.0006807  |
| rs5936284   | 23 | 148554165 G  | 28 | 5 A              | 0.00002648 |
| rs5936285   | 23 | 148554167 T  | 28 | 5 G              | 0.00002648 |
| rs5936286   | 23 | 148555007 A  | 28 | 5 G              | 0.00002648 |
| rs5936186   | 23 | 148555199 G  | 28 | 5 A              | 0.00002648 |

|             |    |             |    |      |             |
|-------------|----|-------------|----|------|-------------|
| rs1329433   | 23 | 148556303 T | 28 | 5 C  | 0.00002648  |
| rs1329432   | 23 | 148556337 A | 28 | 5 G  | 0.00002648  |
| rs5936287   | 23 | 148557940 G | 28 | 5 C  | 0.00002648  |
| rs5936288   | 23 | 148558579 A | 28 | 5 C  | 0.00002648  |
| rs5936289   | 23 | 148558580 G | 28 | 5 T  | 0.00002648  |
| rs5936290   | 23 | 148559165 T | 27 | 5 C  | 0.00005212  |
| rs5936291   | 23 | 148560611 A | 26 | 5 G  | 0.0001012   |
| rs5936292   | 23 | 148560698 A | 26 | 6 G  | 0.0003002   |
| rs5936188   | 23 | 148560766 C | 26 | 5 T  | 0.0001012   |
| rs11969     | 23 | 148561274 C | 28 | 5 T  | 0.00002648  |
| rs1064463   | 23 | 148562599 A | 26 | 5 G  | 0.0001012   |
| rs685678    | 23 | 148565758 C | 28 | 5 A  | 0.00002648  |
| rs10218066  | 23 | 150343248 T | 23 | 4 G  | 0.0002248   |
| X:151164833 | 23 | 151164833 A | 3  | 18 T | 0.0002532   |
| rs146310368 | 23 | 151705018 G | 0  | 9 A  | 0.0009641   |
| rs5945320   | 23 | 152682605 A | 12 | 0 C  | 0.0003752   |
| rs6642292   | 23 | 1.55E+08 C  | 32 | 18 T | 0.000005019 |
| rs6642293   | 23 | 1.55E+08 C  | 26 | 16 T | 0.0002858   |
| rs5940512   | 23 | 1.55E+08 G  | 32 | 18 A | 0.000005019 |
| rs5940513   | 23 | 1.55E+08 A  | 26 | 16 G | 0.0002858   |
| rs5940526   | 23 | 1.55E+08 T  | 32 | 18 A | 0.000005019 |
| rs5940397   | 23 | 1.55E+08 G  | 26 | 16 A | 0.0002858   |
| rs12834147  | 23 | 1.55E+08 G  | 26 | 16 C | 0.0002858   |
| rs2890132   | 23 | 1.55E+08 G  | 26 | 16 A | 0.0002858   |
| rs371249305 | 23 | 1.55E+08 TA | 26 | 16 T | 0.0002858   |
| rs1598125   | 23 | 1.55E+08 T  | 26 | 16 C | 0.0002858   |
| rs139295015 | 23 | 1.55E+08 T  | 32 | 18 C | 0.000005019 |
| rs140600574 | 23 | 1.55E+08 C  | 26 | 16 T | 0.0002858   |
| rs142781423 | 23 | 1.55E+08 T  | 26 | 16 C | 0.0003104   |
| rs1084453   | 23 | 1.55E+08 C  | 26 | 16 T | 0.0002858   |
| rs1084452   | 23 | 1.55E+08 C  | 26 | 14 T | 0.00009952  |
| rs1084451   | 23 | 1.55E+08 A  | 26 | 16 C | 0.0002858   |
| rs1091848   | 23 | 1.55E+08 C  | 26 | 16 T | 0.0003104   |
| rs782311    | 23 | 1.55E+08 C  | 26 | 16 T | 0.0002858   |
| rs782310    | 23 | 1.55E+08 T  | 26 | 16 C | 0.0002858   |
| rs1084450   | 23 | 1.55E+08 A  | 26 | 16 T | 0.0002858   |
| rs782308    | 23 | 1.55E+08 T  | 26 | 16 A | 0.0002858   |
| rs782307    | 23 | 1.55E+08 G  | 32 | 18 C | 0.000005019 |
| rs782306    | 23 | 1.55E+08 G  | 26 | 16 A | 0.0001017   |
| rs809138    | 23 | 1.55E+08 T  | 26 | 16 C | 0.0002858   |
| rs5983745   | 23 | 1.55E+08 T  | 26 | 16 C | 0.0002858   |

|             |    |                 |    |               |             |
|-------------|----|-----------------|----|---------------|-------------|
| rs5983658   | 23 | 1.55E+08 C      | 26 | 16 T          | 0.0002858   |
| rs5940539   | 23 | 1.55E+08 A      | 32 | 18 C          | 0.000005019 |
| rs10782079  | 23 | 1.55E+08 A      | 26 | 16 G          | 0.0002858   |
| rs522805    | 23 | 1.55E+08 T      | 26 | 16 C          | 0.0002858   |
| rs89278     | 23 | 1.55E+08 C      | 26 | 16 T          | 0.0002858   |
| rs479901    | 23 | 1.55E+08 A      | 26 | 16 T          | 0.0002858   |
| rs476928    | 23 | 1.55E+08 C      | 26 | 16 G          | 0.0002858   |
| rs561928    | 23 | 1.55E+08 G      | 26 | 16 T          | 0.0002858   |
| rs498000    | 23 | 1.55E+08 G      | 26 | 16 T          | 0.0002858   |
| rs580468    | 23 | 1.55E+08 A      | 32 | 18 G          | 0.000005019 |
| rs574386    | 23 | 1.55E+08 C      | 26 | 16 T          | 0.0002858   |
| rs146884178 | 23 | 1.55E+08 T      | 26 | 16 TCTTAGAGCC | 0.0002858   |
| rs1834433   | 23 | 1.55E+08 G      | 26 | 16 T          | 0.00005482  |
| rs672434    | 23 | 1.55E+08 T      | 26 | 16 A          | 0.0002858   |
| rs569049    | 23 | 1.55E+08 T      | 26 | 16 C          | 0.0002858   |
| rs561841    | 23 | 1.55E+08 G      | 26 | 16 A          | 0.0002858   |
| rs75097820  | 23 | 1.55E+08 T      | 26 | 16 TTA        | 0.0002858   |
| rs654274    | 23 | 1.55E+08 A      | 26 | 16 G          | 0.0002858   |
| rs666267    | 23 | 1.55E+08 C      | 26 | 16 G          | 0.0002858   |
| rs666344    | 23 | 1.55E+08 A      | 26 | 16 C          | 0.0002858   |
| rs573685    | 23 | 1.55E+08 T      | 26 | 16 A          | 0.0002858   |
| rs514136    | 23 | 1.55E+08 C      | 24 | 16 T          | 0.0005508   |
| rs513234    | 23 | 1.55E+08 T      | 26 | 16 C          | 0.0002858   |
| rs622211    | 23 | 1.55E+08 A      | 26 | 16 G          | 0.0002858   |
| rs487307    | 23 | 1.55E+08 A      | 26 | 16 G          | 0.0002858   |
| rs601290    | 23 | 1.55E+08 G      | 26 | 16 A          | 0.0002858   |
| rs473772    | 23 | 1.55E+08 T      | 26 | 16 C          | 0.0002858   |
| rs528286    | 23 | 1.55E+08 C      | 27 | 16 T          | 0.0001457   |
| rs612412    | 23 | 1.55E+08 G      | 26 | 16 A          | 0.0002858   |
| rs613783    | 23 | 1.55E+08 C      | 32 | 18 A          | 0.000005019 |
| rs642362    | 23 | 1.55E+08 A      | 26 | 16 G          | 0.0002858   |
| rs372034665 | 23 | 1.55E+08 GTACTC | 26 | 16 G          | 0.0002858   |
| rs150712976 | 23 | 1.55E+08 A      | 26 | 16 G          | 0.0002858   |
| rs491661    | 23 | 1.55E+08 T      | 24 | 16 A          | 0.0005508   |
| rs494282    | 23 | 1.55E+08 C      | 26 | 16 T          | 0.0002858   |
| rs520792    | 23 | 1.55E+08 G      | 32 | 18 A          | 0.000005019 |
| rs563690    | 23 | 1.55E+08 G      | 26 | 16 A          | 0.0002858   |
| rs608695    | 23 | 1.55E+08 A      | 26 | 16 G          | 0.0002858   |
| rs610828    | 23 | 1.55E+08 A      | 26 | 16 G          | 0.0002858   |
| rs512918    | 23 | 1.55E+08 G      | 32 | 18 A          | 0.000005019 |
| rs636742    | 23 | 1.55E+08 C      | 26 | 16 T          | 0.0002858   |

|             |    |             |    |        |             |
|-------------|----|-------------|----|--------|-------------|
| rs638156    | 23 | 1.55E+08 T  | 26 | 16 A   | 0.0002858   |
| rs547437    | 23 | 1.55E+08 G  | 26 | 16 A   | 0.0002858   |
| rs671588    | 23 | 1.55E+08 C  | 26 | 16 T   | 0.0002858   |
| rs526172    | 23 | 1.55E+08 G  | 26 | 16 T   | 0.0002858   |
| rs553678    | 23 | 1.55E+08 A  | 26 | 16 G   | 0.0003104   |
| rs513900    | 23 | 1.55E+08 C  | 26 | 16 T   | 0.0002858   |
| rs637652    | 23 | 1.55E+08 A  | 26 | 16 C   | 0.0002858   |
| rs34440537  | 23 | 1.55E+08 TA | 26 | 16 T   | 0.0002858   |
| rs586843    | 23 | 1.55E+08 G  | 26 | 16 A   | 0.0002858   |
| rs549327    | 23 | 1.55E+08 C  | 32 | 18 A   | 0.000005019 |
| rs473491    | 23 | 1.55E+08 A  | 32 | 18 G   | 0.000005019 |
| rs628761    | 23 | 1.55E+08 C  | 26 | 16 A   | 0.0002858   |
| rs627797    | 23 | 1.55E+08 C  | 32 | 18 G   | 0.000005019 |
| rs697727    | 23 | 1.55E+08 A  | 26 | 16 G   | 0.0002858   |
| rs696316    | 23 | 1.55E+08 G  | 26 | 16 T   | 0.0002858   |
| rs697725    | 23 | 1.55E+08 A  | 26 | 16 T   | 0.0003104   |
| rs479770    | 23 | 1.55E+08 G  | 26 | 16 A   | 0.0002858   |
| rs480725    | 23 | 1.55E+08 A  | 26 | 16 T   | 0.0002858   |
| rs674707    | 23 | 1.55E+08 G  | 26 | 16 A   | 0.0002858   |
| rs488777    | 23 | 1.55E+08 T  | 26 | 16 C   | 0.0002858   |
| rs601837    | 23 | 1.55E+08 C  | 26 | 16 G   | 0.0002858   |
| rs473529    | 23 | 1.55E+08 G  | 32 | 21 C   | 0.00003887  |
| rs586454    | 23 | 1.55E+08 T  | 25 | 13 G   | 0.0000842   |
| rs622581    | 23 | 1.55E+08 C  | 26 | 16 T   | 0.0003104   |
| rs35543589  | 23 | 1.55E+08 C  | 26 | 14 CT  | 0.00009952  |
| rs571421    | 23 | 1.55E+08 A  | 24 | 16 G   | 0.0005508   |
| rs672932    | 23 | 1.55E+08 A  | 26 | 16 G   | 0.0002858   |
| rs669237    | 23 | 1.55E+08 T  | 26 | 16 G   | 0.0002858   |
| rs642043    | 23 | 1.55E+08 T  | 32 | 21 C   | 0.00003887  |
| rs509981    | 23 | 1.55E+08 T  | 26 | 16 C   | 0.0002858   |
| rs538470    | 23 | 1.55E+08 T  | 26 | 16 C   | 0.0002858   |
| rs645904    | 23 | 1.55E+08 T  | 26 | 16 C   | 0.0002858   |
| rs644138    | 23 | 1.55E+08 A  | 32 | 21 G   | 0.00003887  |
| rs557132    | 23 | 1.55E+08 T  | 26 | 16 C   | 0.0002858   |
| rs4012982   | 23 | 1.55E+08 C  | 25 | 16 CAA | 0.0005585   |
| rs781880    | 23 | 1.55E+08 G  | 22 | 12 A   | 0.0002081   |
| X:154981605 | 23 | 1.55E+08 A  | 15 | 4 T    | 0.0001557   |
| X:155255914 | 23 | 1.55E+08 C  | 9  | 1 G    | 0.0007194   |



**Supplementary Table 4.** All MCODE module genes. Indicated by TRUE (T) or FALSE (F) if they were included in the individual modules for neutropenia, leukopenia, and thrombocytopenia, respectively.

| Gene Name | EntrezID  | Neutropenia | Leukopenia | Thrombocytopenia |
|-----------|-----------|-------------|------------|------------------|
| AKT3      | 10000     | T           | T          | F                |
| CDH5      | 1003      | T           | F          | T                |
| TOM1L1    | 10040     | F           | T          | F                |
| OCLN      | 100506658 | T           | F          | F                |
| NR1H3     | 10062     | T           | T          | F                |
| TRAP1     | 10131     | F           | T          | F                |
| OPTN      | 10133     | F           | T          | F                |
| TOB1      | 10140     | F           | T          | T                |
| SORBS3    | 10174     | F           | F          | T                |
| TRIB1     | 10221     | F           | F          | T                |
| STAM2     | 10254     | F           | T          | F                |
| CDKN1B    | 1027      | T           | F          | F                |
| CDKN2A    | 1029      | F           | F          | T                |
| CCNO      | 10309     | T           | F          | F                |
| ANAPC10   | 10393     | F           | F          | T                |
| PRMT5     | 10419     | F           | T          | T                |
| UBAC1     | 10422     | T           | F          | F                |
| RBM14     | 10432     | F           | F          | T                |
| SEMA4D    | 10507     | T           | F          | F                |
| CEBPB     | 1051      | F           | F          | T                |
| CIB1      | 10519     | F           | F          | T                |
| BATF      | 10538     | T           | F          | F                |
| ARFGEF2   | 10564     | F           | T          | F                |
| RABAC1    | 10567     | T           | T          | T                |
| SH2B2     | 10603     | F           | F          | T                |
| PDLIM5    | 10611     | F           | F          | T                |
| TXNIP     | 10628     | T           | F          | F                |
| RGS14     | 10636     | T           | T          | F                |
| EXOC5     | 10640     | F           | T          | F                |
| GNA13     | 10672     | T           | F          | F                |
| RBBP9     | 10741     | F           | T          | F                |
| CFTR      | 1080      | F           | F          | T                |
| FRS3      | 10817     | F           | F          | T                |
| PPARGC1A  | 10891     | F           | T          | F                |
| GADD45G   | 10912     | F           | T          | T                |
| RALBP1    | 10928     | F           | F          | T                |
| MORF4L1   | 10933     | F           | T          | F                |
| CBX1      | 10951     | T           | F          | F                |
| STIP1     | 10963     | F           | T          | T                |
| RCC1      | 1104      | F           | F          | T                |
| WWP1      | 11059     | T           | T          | F                |
| ADCY5     | 111       | F           | T          | F                |
| CIT       | 11113     | T           | F          | F                |
| DMC1      | 11144     | F           | T          | T                |
| MAP4K1    | 11184     | T           | F          | F                |
| CHM       | 1121      | T           | F          | F                |
| AKAP11    | 11215     | F           | T          | F                |
| AKAP2     | 11217     | F           | T          | F                |
| DDX20     | 11218     | F           | T          | F                |
| CTRC      | 11330     | F           | T          | F                |

|          |          |   |   |
|----------|----------|---|---|
| PDAP1    | 11333 T  | F | F |
| SIGLEC11 | 114132 T | T | F |
| SLAMF6   | 114836 F | F | T |
| CISH     | 1154 F   | F | T |
| UHRF2    | 115426 F | T | F |
| AGAP2    | 116986 F | F | T |
| CPXM2    | 119587 T | F | F |
| SERPINA3 | 12 T     | T | F |
| JDP2     | 122953 F | T | F |
| CNGB1    | 1258 T   | F | F |
| CNN1     | 1264 F   | T | F |
| CNTN1    | 1272 F   | T | F |
| COPA     | 1314 F   | F | T |
| COX11    | 1353 F   | T | F |
| GAB3     | 139716 T | F | T |
| CRKL     | 1399 T   | F | T |
| PARP1    | 142 T    | F | T |
| CD300LF  | 146722 T | F | F |
| ADRA1A   | 148 T    | F | F |
| CTBP1    | 1487 F   | T | F |
| AANAT    | 15 F     | T | F |
| CTNND1   | 1500 T   | F | T |
| NFAM1    | 150372 F | F | T |
| CTRB1    | 1504 F   | T | F |
| CTRL     | 1506 T   | F | F |
| CTSB     | 1508 T   | F | F |
| BTLA     | 151888 F | F | T |
| AMOT     | 154796 T | F | F |
| DAB1     | 1600 T   | F | F |
| DAB2     | 1601 T   | T | F |
| AP2A2    | 161 F    | T | F |
| DAPK3    | 1613 F   | T | F |
| SPRED1   | 161742 F | F | T |
| DCTN1    | 1639 T   | T | T |
| DDX5     | 1655 F   | T | T |
| DIAPH1   | 1729 T   | F | F |
| DLG2     | 1740 F   | T | F |
| DLG4     | 1742 F   | T | T |
| DLX3     | 1747 F   | F | T |
| DNM1     | 1759 F   | T | F |
| DNM2     | 1785 T   | F | F |
| DOK1     | 1796 F   | T | F |
| ATN1     | 1822 T   | T | F |
| DSG3     | 1830 T   | F | F |
| TSC22D3  | 1831 F   | T | F |
| DUSP1    | 1843 F   | F | T |
| DUSP3    | 1845 F   | T | T |
| DUT      | 1854 F   | T | F |
| E2F5     | 1875 F   | T | F |
| EFNA1    | 1942 T   | F | F |
| EFNA4    | 1945 T   | F | F |
| EPHA2    | 1969 T   | T | F |
| ELANE    | 1991 T   | F | F |
| ELAVL4   | 1996 F   | F | T |
| ELK1     | 2002 F   | F | T |
| EP300    | 2033 T   | T | F |
| EPB42    | 2038 F   | T | F |
| EPRS     | 2058 F   | T | F |
| ERBB2    | 2064 T   | T | T |

|          |          |   |   |
|----------|----------|---|---|
| ERF      | 2077 T   | F | F |
| ERG      | 2078 T   | T | T |
| ETV3     | 2117 F   | T | F |
| MECOM    | 2122 F   | T | F |
| EWSR1    | 2130 F   | T | F |
| F2       | 2147 T   | T | T |
| F2RL2    | 2151 T   | F | F |
| F8       | 2157 F   | T | T |
| F9       | 2158 T   | F | F |
| F10      | 2159 T   | F | F |
| F11      | 2160 T   | F | F |
| PTK2B    | 2185 T   | F | T |
| FER      | 2241 F   | T | F |
| ABCD2    | 225 F    | F | T |
| FGF9     | 2254 T   | F | F |
| FGFR2    | 2263 T   | F | F |
| FGR      | 2268 T   | T | T |
| FHL3     | 2275 F   | F | T |
| RRAS2    | 22800 F  | T | F |
| ICK      | 22858 T  | F | F |
| FOXG1    | 2290 F   | F | T |
| HABP4    | 22927 T  | F | T |
| PAXIP1   | 22976 T  | F | F |
| AKR1B1   | 231 F    | T | F |
| FLG      | 2312 F   | F | T |
| ABRAXAS2 | 23172 F  | F | T |
| FLNC     | 2318 T   | T | T |
| FLT1     | 2321 F   | T | F |
| ITGB3BP  | 23421 F  | T | F |
| CD2AP    | 23607 T  | F | T |
| CBLC     | 23624 T  | F | F |
| TRIM29   | 23650 T  | F | F |
| KCNE4    | 23704 F  | T | F |
| MAFF     | 23764 F  | F | T |
| ABL1     | 25 T     | F | T |
| NR5A1    | 2516 F   | T | F |
| GAB1     | 2549 F   | T | F |
| GABRG2   | 2566 F   | T | F |
| GAD2     | 2572 F   | T | F |
| RAD54B   | 25788 T  | F | T |
| SUMF2    | 25870 F  | F | T |
| GORASP2  | 26003 F  | F | T |
| PTPN18   | 26469 T  | T | F |
| GDI1     | 2664 T   | F | F |
| GDI2     | 2665 F   | T | T |
| RGL4     | 266747 T | F | T |
| GHR      | 2690 F   | T | F |
| NBEA     | 26960 F  | T | F |
| LAT      | 27040 T  | F | F |
| GJB1     | 2705 F   | T | F |
| CACYBP   | 27101 F  | F | T |
| ZBTB11   | 27107 F  | F | T |
| SIT1     | 27240 F  | F | T |
| APEX2    | 27301 F  | F | T |
| ANGPTL3  | 27329 F  | T | F |
| GLI1     | 2735 T   | F | F |
| GLI2     | 2736 F   | T | F |
| GLI3     | 2737 T   | T | T |
| POLM     | 27434 F  | T | F |

|         |       |   |   |   |
|---------|-------|---|---|---|
| GMFB    | 2764  | T | F | F |
| GOLGA1  | 2800  | F | F | T |
| GP1BA   | 2811  | F | T | F |
| GP5     | 2814  | F | F | T |
| ANG     | 283   | F | T | F |
| DLL1    | 28514 | F | T | F |
| GRK5    | 2869  | F | F | T |
| GRB7    | 2886  | T | T | F |
| GRB10   | 2887  | T | F | T |
| GRIA3   | 2892  | T | F | F |
| GRIN1   | 2902  | F | F | T |
| GRIN2D  | 2906  | F | F | T |
| ZBTB44  | 29068 | F | F | T |
| FHOD1   | 29109 | T | F | F |
| GTF2I   | 2969  | T | F | F |
| BLNK    | 29760 | F | F | T |
| PILRA   | 29992 | T | T | F |
| GUCY2D  | 3000  | T | F | F |
| SH3KBP1 | 30011 | F | T | F |
| HCLS1   | 3059  | T | F | F |
| HDAC1   | 3065  | F | T | T |
| HGFAC   | 3083  | T | F | F |
| HMGB2   | 3148  | T | F | F |
| HMGA1   | 3159  | F | T | F |
| APBB1   | 322   | T | F | F |
| APC     | 324   | T | T | T |
| HRAS    | 3265  | F | T | F |
| ERAS    | 3266  | F | T | F |
| APEX1   | 328   | T | T | T |
| DNAJB2  | 3300  | F | T | F |
| HSPA8   | 3312  | F | T | F |
| TNC     | 3371  | F | F | T |
| APOB    | 338   | T | F | T |
| IFNAR1  | 3454  | T | T | T |
| IFNB1   | 3456  | F | T | F |
| IFNGR1  | 3459  | T | F | F |
| APOE    | 348   | T | F | T |
| KLK3    | 354   | T | F | T |
| IL6ST   | 3572  | F | T | T |
| IL13RA1 | 3597  | F | T | F |
| INS     | 3630  | F | F | T |
| INPP5D  | 3635  | T | T | F |
| INPPL1  | 3636  | T | F | F |
| ITGA2B  | 3674  | T | F | F |
| ITGB2   | 3689  | T | T | T |
| ARAF    | 369   | T | F | T |
| ITGB3   | 3690  | T | T | T |
| EIF6    | 3692  | F | T | F |
| JAK1    | 3716  | T | F | F |
| JUN     | 3725  | T | T | T |
| JUNB    | 3726  | T | F | F |
| JUND    | 3727  | T | T | T |
| JUP     | 3728  | T | T | T |
| KCNA2   | 3737  | F | T | T |
| KCNA4   | 3739  | F | T | F |
| KCND2   | 3751  | F | T | F |
| KCNJ1   | 3758  | F | F | T |
| KDR     | 3791  | F | T | F |
| KIT     | 3815  | T | T | T |

|         |        |   |   |   |
|---------|--------|---|---|---|
| KPNB1   | 3837   | F | F | T |
| KPNA2   | 3838   | T | T | F |
| KRT7    | 3855   | T | F | F |
| RHOA    | 387    | T | T | T |
| RHOB    | 388    | F | T | T |
| RHOC    | 389    | T | F | T |
| RHOG    | 391    | T | F | F |
| LCP2    | 3937   | T | F | F |
| LDLR    | 3949   | T | F | T |
| ARHGDIB | 397    | F | T | F |
| MYO18A  | 399687 | T | F | T |
| LRP1    | 4035   | T | T | T |
| LRP2    | 4036   | F | F | T |
| LRP5    | 4041   | F | F | T |
| LSAMP   | 4045   | T | F | F |
| LYN     | 4067   | T | T | T |
| NBR1    | 4077   | T | F | T |
| SMAD1   | 4086   | T | T | F |
| SMAD2   | 4087   | F | F | T |
| SMAD3   | 4088   | F | T | T |
| SMAD4   | 4089   | T | T | T |
| SMAD5   | 4090   | T | F | T |
| SMAD7   | 4092   | T | T | T |
| SMAD9   | 4093   | T | T | T |
| MAF     | 4094   | T | F | F |
| MAFG    | 4097   | T | F | F |
| MATK    | 4145   | F | T | F |
| MC2R    | 4158   | F | F | T |
| MDK     | 4192   | F | T | F |
| MDM4    | 4194   | F | T | F |
| RAB8A   | 4218   | F | T | F |
| MEP1B   | 4225   | T | F | F |
| MMP7    | 4316   | T | F | F |
| MMP13   | 4322   | T | F | F |
| MMP15   | 4324   | F | T | F |
| MNAT1   | 4331   | F | T | F |
| MOG     | 4340   | F | T | F |
| MSH3    | 4437   | F | F | T |
| MSH4    | 4438   | F | T | F |
| MST1R   | 4486   | F | T | T |
| MTTP    | 4547   | F | F | T |
| MUC4    | 4585   | F | T | F |
| MUTYH   | 4595   | F | F | T |
| MYC     | 4609   | F | T | T |
| MYLK    | 4638   | F | F | T |
| ATF4    | 468    | F | T | F |
| ATM     | 472    | F | F | T |
| NEK3    | 4752   | F | F | T |
| NF2     | 4771   | F | F | T |
| NFE2L2  | 4780   | F | F | T |
| NFX1    | 4799   | F | F | T |
| NOTCH1  | 4851   | F | F | F |
| NOTCH4  | 4855   | F | F | F |
| CCN3    | 4856   | F | T | T |
| NRGN    | 4900   | F | F | F |
| NTRK1   | 4914   | F | F | F |
| NTRK3   | 4916   | F | F | F |
| ROR2    | 4920   | F | F | T |
| OAZ1    | 4946   | F | F | T |

|          |         |   |   |
|----------|---------|---|---|
| ODC1     | 4953 F  | F | T |
| OPCML    | 4978 F  | F | T |
| OPRK1    | 4986 T  | F | F |
| OSM      | 5008 F  | T | T |
| PEBP1    | 5037 T  | F | T |
| FURIN    | 5045 T  | F | F |
| PCSK6    | 5046 F  | F | T |
| SERPINE1 | 5054 T  | T | F |
| PAK1     | 5058 T  | T | T |
| DEF6     | 50619 F | F | T |
| ARHGEF3  | 50650 F | T | F |
| PAM      | 5066 F  | F | T |
| PAPPA    | 5069 F  | T | F |
| PAX2     | 5076 T  | T | F |
| PAX5     | 5079 T  | F | F |
| F11R     | 50848 F | T | F |
| TRAT1    | 50852 T | F | F |
| SERPINA5 | 5104 T  | T | F |
| PCNA     | 5111 T  | T | T |
| GP6      | 51206 F | T | F |
| ZDHHC3   | 51304 F | T | F |
| PDC      | 5132 T  | F | F |
| FZR1     | 51343 F | T | F |
| CHST15   | 51363 F | F | T |
| UBR5     | 51366 F | T | F |
| ZNF107   | 51427 T | F | F |
| GULP1    | 51454 F | T | F |
| PDE6D    | 5147 F  | F | T |
| PDGFA    | 5154 T  | F | F |
| PDGFB    | 5155 F  | F | T |
| PDGFRA   | 5156 T  | T | T |
| PDGFRB   | 5159 T  | T | T |
| PDHA1    | 5160 F  | F | T |
| PDHB     | 5162 F  | F | T |
| PDPK1    | 5170 T  | F | F |
| PECAM1   | 5175 T  | F | T |
| RAB8B    | 51762 F | F | T |
| PFKFB2   | 5208 F  | T | F |
| PFN1     | 5216 T  | F | F |
| PFN2     | 5217 T  | F | F |
| PGD      | 5226 T  | F | F |
| PHB      | 5245 F  | F | T |
| PHKG1    | 5260 F  | T | F |
| PHKG2    | 5261 F  | T | F |
| SERPINA1 | 5265 T  | F | F |
| SERPINB6 | 5269 F  | T | F |
| SERPINB8 | 5271 F  | F | T |
| PIGR     | 5284 F  | T | F |
| PIK3CB   | 5291 F  | T | T |
| PIM1     | 5292 T  | F | F |
| PIK3R1   | 5295 T  | T | T |
| PIK3R2   | 5296 T  | F | F |
| PIN1     | 5300 F  | F | T |
| PKD1     | 5310 F  | F | T |
| PKD2     | 5311 T  | F | T |
| PLA2G1B  | 5319 T  | F | T |
| PLA2G2A  | 5320 T  | F | T |
| PLAT     | 5327 T  | F | T |
| PLAU     | 5328 F  | T | T |

|         |         |   |   |
|---------|---------|---|---|
| BCL11A  | 53335 T | F | F |
| PLCG1   | 5335 T  | T | T |
| PLCG2   | 5336 F  | T | F |
| PLG     | 5340 T  | T | T |
| PLIN1   | 5346 F  | F | T |
| PLK1    | 5347 T  | T | F |
| PLSCR1  | 5359 T  | F | F |
| PRRX1   | 5396 T  | F | T |
| RIPK4   | 54101 T | F | F |
| POLA1   | 5422 F  | T | F |
| POLB    | 5423 F  | T | T |
| POLG    | 5428 T  | F | F |
| POMC    | 5443 F  | F | T |
| POU1F1  | 5449 F  | T | F |
| APBB1IP | 54518 T | F | F |
| PPARA   | 5465 T  | T | T |
| NDE1    | 54820 T | F | F |
| MTMR10  | 54893 F | T | T |
| RASIP1  | 54922 T | F | F |
| PPM1A   | 5494 T  | T | F |
| MACO1   | 55219 F | T | F |
| PPP2R5A | 5525 T  | F | F |
| PPP2R5C | 5527 T  | F | F |
| FBXW7   | 55294 T | F | F |
| SRGN    | 5552 F  | T | T |
| PRG2    | 5553 F  | T | F |
| PPP1R9A | 55607 T | F | F |
| OTUB1   | 55611 T | F | F |
| PRKACA  | 5566 T  | T | T |
| PRPF40A | 55660 F | T | F |
| PRKACB  | 5567 F  | F | T |
| SCYL2   | 55681 T | F | F |
| PKIA    | 5569 F  | F | T |
| ATF7IP  | 55729 T | F | T |
| PRKAR1A | 5573 F  | F | T |
| ENAH    | 55740 T | F | F |
| PARVA   | 55742 F | F | T |
| PRKAR1B | 5575 T  | F | T |
| PRKAR2A | 5576 T  | T | F |
| EXOC1   | 55763 F | T | F |
| PRKAR2B | 5577 F  | T | F |
| PRKCA   | 5578 T  | T | T |
| PRKCB   | 5579 T  | T | T |
| PRKCD   | 5580 T  | T | T |
| PRKCE   | 5581 T  | T | T |
| PRKCG   | 5582 T  | T | T |
| PAG1    | 55824 F | F | T |
| PRKD1   | 5587 T  | F | F |
| ASH1L   | 55870 F | T | F |
| PRKCQ   | 5588 T  | F | F |
| PRKCZ   | 5590 T  | T | T |
| PRKDC   | 5591 F  | F | T |
| MAPK1   | 5594 T  | T | T |
| MAPK3   | 5595 T  | T | F |
| MAPK4   | 5596 T  | F | F |
| MAPK13  | 5603 F  | T | F |
| PDGFC   | 56034 F | T | F |
| MAP2K1  | 5604 T  | F | T |
| EIF2AK2 | 5610 T  | T | T |

|         |         |   |   |
|---------|---------|---|---|
| DNAJC3  | 5611 T  | F | F |
| PRKX    | 5613 T  | F | F |
| PRLR    | 5618 T  | F | T |
| PRNP    | 5621 T  | T | T |
| PROC    | 5624 F  | T | T |
| PROS1   | 5627 T  | T | F |
| PRPH    | 5630 F  | F | T |
| PRSS2   | 5645 T  | F | F |
| PRTN3   | 5657 F  | T | F |
| PSG9    | 5678 T  | F | F |
| PSMA3   | 5684 T  | F | T |
| RAD18   | 56852 F | T | F |
| PSMA5   | 5686 F  | T | F |
| PSMA6   | 5687 F  | F | T |
| EXOSC5  | 56915 F | T | F |
| PSMD11  | 5717 T  | F | F |
| PTAFR   | 5724 T  | F | F |
| PTGIR   | 5739 T  | F | F |
| PTH     | 5741 T  | F | F |
| PTHLH   | 5744 F  | F | T |
| PTH1R   | 5745 T  | F | F |
| PTK2    | 5747 T  | T | T |
| ESYT2   | 57488 F | F | T |
| PTMA    | 5757 F  | T | F |
| PTPN1   | 5770 T  | T | T |
| PTPN2   | 5771 F  | F | T |
| PTPN6   | 5777 T  | T | T |
| PTPN7   | 5778 T  | F | F |
| PTPN11  | 5781 T  | T | T |
| PTPRA   | 5786 T  | T | F |
| PTPRB   | 5787 F  | T | T |
| PTPRF   | 5792 T  | T | T |
| PTPRG   | 5793 F  | F | T |
| PTPRJ   | 5795 T  | F | F |
| PTPRK   | 5796 F  | T | F |
| PTPRM   | 5797 T  | T | F |
| PTPRO   | 5800 F  | T | F |
| PTPRR   | 5801 F  | F | T |
| PTPRS   | 5802 T  | F | F |
| PVR     | 5817 T  | T | F |
| ABCD3   | 5825 F  | F | T |
| PYGM    | 5837 F  | F | T |
| ZBED5   | 58486 F | F | T |
| MYOZ1   | 58529 T | T | T |
| SNX6    | 58533 F | F | T |
| PZP     | 5858 F  | F | T |
| RAB1A   | 5861 F  | T | T |
| RAB2A   | 5862 F  | T | T |
| RAB3B   | 5865 F  | T | F |
| RAB4A   | 5867 F  | T | T |
| RAB5A   | 5868 T  | T | F |
| RAB5B   | 5869 T  | T | F |
| RAB6A   | 5870 T  | T | T |
| RABGGTA | 5875 F  | T | F |
| RABGGTB | 5876 F  | F | T |
| RAC1    | 5879 F  | T | F |
| RAD51   | 5888 T  | T | T |
| RAG1    | 5896 T  | T | F |
| RAG2    | 5897 T  | F | F |



|          |         |   |   |
|----------|---------|---|---|
| RALA     | 5898 T  | T | T |
| RALB     | 5899 T  | F | T |
| BCHE     | 590 T   | F | T |
| RALGDS   | 5900 F  | T | F |
| RAP1A    | 5906 T  | T | F |
| RAP1B    | 5908 T  | F | F |
| RAP1GDS1 | 5910 F  | T | F |
| RAP2A    | 5911 T  | T | T |
| RAP2B    | 5912 F  | F | T |
| RARA     | 5914 F  | T | F |
| RARG     | 5916 F  | T | F |
| RARS     | 5917 F  | T | F |
| RB1      | 5925 T  | T | T |
| RBBP6    | 5930 F  | T | F |
| RBBP8    | 5932 F  | T | F |
| RBL2     | 5934 F  | T | F |
| TRPV4    | 59341 F | T | F |
| CCND1    | 595 T   | T | T |
| RBP4     | 5950 T  | F | F |
| RCVRN    | 5957 F  | F | T |
| PRPH2    | 5961 T  | F | T |
| REL      | 5966 T  | T | F |
| RELA     | 5970 F  | T | F |
| RFX1     | 5989 T  | F | F |
| RGS4     | 5999 T  | F | F |
| RHO      | 6010 F  | T | F |
| AFAP1    | 60312 T | F | F |
| RNASE1   | 6035 T  | T | F |
| EXOC4    | 60412 T | F | F |
| RNH1     | 6050 T  | T | F |
| ROCK1    | 6093 F  | F | T |
| ROM1     | 6094 T  | F | F |
| RP1      | 6101 T  | F | F |
| RPA1     | 6117 F  | T | F |
| RPL18A   | 6142 F  | F | T |
| RPS3A    | 6189 T  | F | F |
| RPS6KA2  | 6196 T  | F | F |
| RPS6KA3  | 6197 F  | T | F |
| RPS7     | 6201 F  | F | T |
| RRAD     | 6236 T  | T | T |
| RRAS     | 6237 T  | F | T |
| RRBP1    | 6238 F  | F | T |
| RTKN     | 6242 F  | T | F |
| RXRA     | 6256 T  | T | T |
| RYR2     | 6262 T  | F | F |
| S100A1   | 6271 F  | F | T |
| S100A2   | 6273 T  | T | F |
| S100A4   | 6275 F  | F | T |
| S100B    | 6285 T  | F | F |
| SCN3A    | 6328 F  | T | F |
| BGN      | 633 F   | F | T |
| SCTR     | 6344 F  | T | T |
| CCL3     | 6348 F  | T | F |
| BICD1    | 636 T   | F | F |
| SDC4     | 6385 F  | F | T |
| SELE     | 6401 T  | F | F |
| SEMG1    | 6406 F  | T | T |
| SEMG2    | 6407 T  | T | F |
| BLM      | 641 F   | T | F |

|          |        |   |   |   |
|----------|--------|---|---|---|
| SET      | 6418   | T | F | F |
| COP1     | 64326  | T | T | T |
| SHB      | 6461   | T | F | F |
| SHC1     | 6464   | F | T | T |
| ACBD3    | 64746  | F | F | T |
| SMURF2   | 64750  | T | T | T |
| SIAH1    | 6477   | F | F | T |
| RMND5B   | 64777  | F | F | T |
| RMND5A   | 64795  | F | T | F |
| SKIL     | 6498   | T | T | F |
| SLAMF1   | 6504   | F | T | F |
| SLC2A4   | 6517   | T | F | T |
| NCF1     | 653361 | F | F | T |
| SLC6A8   | 6535   | F | T | F |
| SFTPA1   | 653509 | T | F | T |
| SLC9A1   | 6548   | F | F | T |
| SLPI     | 6590   | T | F | T |
| SNRNP70  | 6625   | F | T | F |
| SNRPA    | 6626   | F | F | T |
| SOX5     | 6660   | T | F | F |
| SP1      | 6667   | F | T | T |
| SPARC    | 6678   | T | F | F |
| SPI1     | 6688   | F | T | T |
| SPIB     | 6689   | T | T | F |
| SPTAN1   | 6709   | T | T | F |
| SRC      | 6714   | T | T | F |
| SRF      | 6722   | T | F | F |
| SSBP1    | 6742   | T | F | F |
| SSTR2    | 6752   | F | T | F |
| STAT1    | 6772   | F | F | T |
| STAT5B   | 6777   | F | F | T |
| SYK      | 6850   | T | T | T |
| TAF1     | 6872   | F | F | T |
| TAGLN    | 6876   | T | F | F |
| TARBP2   | 6895   | F | F | T |
| TBP      | 6908   | T | T | F |
| TCF20    | 6942   | F | T | F |
| BTK      | 695    | F | T | F |
| TCTA     | 6988   | T | F | F |
| BUB1     | 699    | F | T | F |
| DYNLT3   | 6990   | F | T | F |
| TEC      | 7006   | F | T | T |
| TEK      | 7010   | F | T | F |
| TFAP2A   | 7020   | T | T | F |
| NR2F2    | 7026   | T | F | T |
| TFRC     | 7037   | T | F | F |
| TGFBR1   | 7046   | F | F | T |
| TGIF1    | 7050   | F | F | T |
| THBS1    | 7057   | F | T | T |
| TIAM1    | 7074   | T | F | F |
| NKX2-1   | 7080   | T | F | T |
| TLE3     | 7090   | F | F | T |
| TLE4     | 7091   | T | F | F |
| TLN1     | 7094   | F | F | T |
| SERPING1 | 710    | F | F | T |
| TP53     | 7157   | F | T | T |
| TPM2     | 7169   | T | T | F |
| TPM3     | 7170   | T | F | F |
| TPR      | 7175   | T | F | F |

|           |          |   |   |
|-----------|----------|---|---|
| TRAF3     | 7187 T   | F | F |
| TRIO      | 7204 F   | F | T |
| TRIP6     | 7205 T   | F | F |
| DNAJC7    | 7266 F   | T | F |
| TTN       | 7273 F   | F | T |
| TTR       | 7276 T   | F | F |
| TUBA4A    | 7277 T   | F | F |
| PTMAP12   | 728026 F | T | F |
| SFTPA2    | 729238 T | F | F |
| TXN       | 7295 F   | F | T |
| TYK2      | 7297 T   | T | T |
| C7        | 730 F    | T | F |
| TYRO3     | 7301 F   | F | T |
| UBE2B     | 7320 F   | T | F |
| UBE2G1    | 7326 F   | F | T |
| UBE2I     | 7329 F   | F | T |
| SUMO1     | 7341 T   | F | F |
| UBTF      | 7343 F   | T | T |
| USP4      | 7375 F   | T | F |
| VAV1      | 7409 F   | T | T |
| VAV2      | 7410 T   | T | F |
| VCL       | 7414 F   | T | T |
| TRPV1     | 7442 F   | T | F |
| VTN       | 7448 F   | T | F |
| WNT5A     | 7474 F   | F | T |
| WRN       | 7486 F   | F | T |
| WT1       | 7490 F   | T | F |
| XRCC5     | 7520 F   | F | T |
| YES1      | 7525 T   | T | T |
| YWHAG     | 7532 F   | F | T |
| YWHAZ     | 7534 T   | T | T |
| ZAP70     | 7535 T   | T | T |
| ZIC1      | 7545 T   | T | F |
| ZIC2      | 7546 F   | T | F |
| DDR1      | 780 F    | T | F |
| LAPTM5    | 7805 T   | T | F |
| DAP3      | 7818 T   | F | F |
| PRKRIP1   | 79706 T  | F | F |
| CALM1     | 801 F    | T | F |
| ADAM12    | 8038 T   | F | F |
| CALM2     | 805 F    | T | F |
| CALM3     | 808 F    | T | F |
| ACTN4     | 81 T     | F | F |
| CALR      | 811 F    | F | T |
| SF3A2     | 8175 F   | T | F |
| NCOA3     | 8202 F   | F | T |
| NRIP1     | 8204 T   | F | F |
| CANX      | 821 T    | F | F |
| CAPZA1    | 829 T    | F | F |
| COLQ      | 8292 T   | F | T |
| HIST2H2BE | 8349 F   | F | T |
| RASSF5    | 83593 T  | F | F |
| CASP3     | 836 T    | T | F |
| KRTAP4-12 | 83755 T  | T | F |
| CASP6     | 839 T    | F | F |
| CASP7     | 840 T    | F | F |
| EEA1      | 8411 T   | T | F |
| SLA2      | 84174 F  | T | F |
| CASP9     | 842 T    | F | F |

|          |         |   |   |
|----------|---------|---|---|
| NR0B2    | 8431 F  | T | F |
| NAA38    | 84316 T | F | F |
| NCK2     | 8440 F  | T | T |
| MEGF11   | 84465 F | T | F |
| CASR     | 846 T   | F | T |
| PAR6B    | 84612 T | F | F |
| SORBS2   | 8470 T  | F | F |
| IRS4     | 8471 F  | T | F |
| PIK3R3   | 8503 F  | T | F |
| KCNAB2   | 8514 F  | F | T |
| DGKZ     | 8525 F  | F | T |
| MICALL1  | 85377 F | T | F |
| PPFIA3   | 8541 F  | F | T |
| BLZF1    | 8548 F  | T | F |
| PIAS1    | 8554 T  | F | T |
| THOC5    | 8563 F  | T | F |
| CAV1     | 857 F   | F | T |
| RUVBL1   | 8607 T  | F | F |
| NCOA1    | 8648 T  | F | T |
| SOCS1    | 8651 F  | F | T |
| DYNLL1   | 8655 F  | T | F |
| IRS2     | 8660 F  | F | T |
| EIF3C    | 8663 F  | T | F |
| CBL      | 867 T   | T | T |
| TNK1     | 8711 F  | F | T |
| ADAM9    | 8754 T  | F | F |
| MPDZ     | 8777 F  | T | F |
| ACTN2    | 88 T    | T | F |
| TRIM24   | 8805 T  | F | F |
| SOCS2    | 8835 T  | F | F |
| HDAC3    | 8841 F  | F | T |
| NR1I2    | 8856 F  | T | F |
| PROZ     | 8858 F  | F | T |
| IER3     | 8870 F  | T | F |
| KRIT1    | 889 F   | T | F |
| AP1M1    | 8907 F  | T | F |
| HERC1    | 8925 F  | T | F |
| BTRC     | 8945 F  | F | T |
| CCNT2    | 905 F   | T | F |
| PIGQ     | 9091 F  | T | F |
| DNAJA3   | 9093 T  | T | F |
| RABEP1   | 9135 F  | T | T |
| DYRK1B   | 9149 T  | F | F |
| UBXN11   | 91544 F | T | F |
| CD3E     | 916 T   | F | F |
| OSMR     | 9180 F  | T | F |
| RASSF9   | 9182 F  | F | T |
| BUB3     | 9184 F  | F | T |
| DDX21    | 9188 F  | F | T |
| CD4      | 920 T   | T | F |
| CD7      | 924 T   | F | T |
| CYTH2    | 9266 F  | T | F |
| TRIP10   | 9322 F  | T | F |
| CD163    | 9332 F  | T | F |
| SLC9A3R1 | 9368 T  | F | F |
| ZFYVE9   | 9372 T  | T | T |
| SYTL5    | 94122 T | F | F |
| HAND1    | 9421 F  | F | T |
| PPP1R14A | 94274 F | F | T |

|          |        |   |   |
|----------|--------|---|---|
| NCR1     | 9437 T | F | T |
| MAPK8IP1 | 9479 T | F | F |
| CD36     | 948 F  | T | F |
| AKAP5    | 9495 F | T | F |
| BCAR1    | 9564 T | T | T |
| GTPBP1   | 9567 F | F | T |
| SOX13    | 9580 F | T | T |
| CD44     | 960 T  | F | T |
| PDIA4    | 9601 T | F | F |
| NCOR1    | 9611 T | F | F |
| NUP155   | 9631 T | F | T |
| FEZ1     | 9638 T | F | F |
| CTR9     | 9646 F | F | T |
| CD59     | 966 T  | T | T |
| RIMS2    | 9699 F | T | F |
| CD72     | 971 T  | F | F |
| NOS1AP   | 9722 F | T | F |
| CD81     | 975 F  | T | F |
| RAPGEF5  | 9771 T | F | F |
| ELMO1    | 9844 T | F | F |
| GAB2     | 9846 T | F | F |
| SETDB1   | 9869 F | T | T |
| CDC6     | 990 F  | T | F |
| NR1I3    | 9970 F | T | F |
| CDH1     | 999 T  | T | F |
| DGCR2    | 9993 T | F | F |

**Supplementary Table 5a.** MCODE module enrichment with rat data.

| <b>Module</b>             | <b>Algorithm</b> | <b>Rat data</b>     | <b>OR</b> | <b>Size of overlap</b> | <b>p-value</b> |
|---------------------------|------------------|---------------------|-----------|------------------------|----------------|
| Toxicity module           | MCODE            | Carboplatin 72hours | 3.07      | 5                      | 2.44E-02       |
| Toxicity module           | MCODE            | Gemcitabine 72hours | 4.36      | 23                     | 3.93E-09       |
| Neutropenia module        | MCODE            | Carboplatin 72hours | 2.19      | 8                      | 3.07E-02       |
| Neutropenia module        | MCODE            | Gemcitabine 72hours | 3.14      | 37                     | 8.48E-10       |
| Leukopenia module         | MCODE            | Carboplatin 72hours | 2.78      | 10                     | 3.43E-03       |
| Leukopenia module         | MCODE            | Gemcitabine 72hours | 2.75      | 32                     | 2.52E-07       |
| Thrombocytopenia module   | MCODE            | Carboplatin 72hours | 2.76      | 9                      | 5.68E-03       |
| Thrombocytopenia module   | MCODE            | Gemcitabine 72hours | 2.47      | 26                     | 2.38E-05       |
| Leukopenia seedlist       | MCODE            | Carboplatin 72hours | 0.08      | 8                      | 7.86E-01       |
| Leukopenia seedlist       | MCODE            | Gemcitabine 72hours | 1.28      | 43                     | 5.96E-02       |
| Neutropenia seedlist      | MCODE            | Carboplatin 72hours | 1.26      | 12                     | 2.49E-01       |
| Neutropenia seedlist      | MCODE            | Gemcitabine 72hours | 1.27      | 41                     | 6.78E-01       |
| Thrombocytopenia seedlist | MCODE            | Carboplatin 72hours | 0.57      | 6                      | 9.57E-01       |
| Thrombocytopenia seedlist | MCODE            | Gemcitabine 72hours | 0.98      | 35                     | 5.79E-01       |

**Supplementary Table 5b.** The other algorithms, DIAMOnD, CliqueSuM, and ModuleDiscoverer, for module constructions enrichment with rat data.

| <b>Toxicity phenotype module</b> | <b>Algorithm</b> | <b>Rat data</b>     | <b>OR</b> |
|----------------------------------|------------------|---------------------|-----------|
| Leukopenia module                | DIAMOnD          | Carboplatin 72hours | 2.72      |
| Leukopenia module                | CliqueSuM        | Carboplatin 72hours | 1.54      |
| Leukopenia module                | ModuleDiscoverer | Carboplatin 72hours | 0.00      |
| Leukopenia module                | DIAMOnD          | Gemcitabine 72hours | 2.35      |
| Leukopenia module                | CliqueSuM        | Gemcitabine 72hours | 1.51      |
| Leukopenia module                | ModuleDiscoverer | Gemcitabine 72hours | 0.70      |
| Neutropenia module               | DIAMOnD          | Carboplatin 72hours | 2.25      |
| Neutropenia module               | CliqueSuM        | Carboplatin 72hours | 1.68      |
| Neutropenia module               | ModuleDiscoverer | Carboplatin 72hours | 0.00      |
| Neutropenia module               | DIAMOnD          | Gemcitabine 72hours | 2.00      |
| Neutropenia module               | CliqueSuM        | Gemcitabine 72hours | 1.60      |
| Neutropenia module               | ModuleDiscoverer | Gemcitabine 72hours | 0.00      |
| Thrombocytopenia module          | DIAMOnD          | Carboplatin 72hours | 2.22      |
| Thrombocytopenia module          | CliqueSuM        | Carboplatin 72hours | 1.49      |
| Thrombocytopenia module          | ModuleDiscoverer | Carboplatin 72hours | 0.23      |
| Thrombocytopenia module          | DIAMOnD          | Gemcitabine 72hours | 2.23      |
| Thrombocytopenia module          | CliqueSuM        | Gemcitabine 72hours | 1.57      |
| Thrombocytopenia module          | ModuleDiscoverer | Gemcitabine 72hours | 0.00      |

**Supplementary Table 6.** Genes from the toxicity module expressed with a TPM > 1 in  $\geq 2$  cell line samples.

| Gene ID | Gene Name | Ensembl ID      |
|---------|-----------|-----------------|
| 10000   | AKT3      | ENSG00000117020 |
| 10062   | NR1H3     | ENSG00000025434 |
| 10140   | TOB1      | ENSG00000141232 |
| 10419   | PRMT5     | ENSG00000100462 |
| 10567   | RABAC1    | ENSG00000105404 |
| 10636   | RGS14     | ENSG00000169220 |
| 10963   | STIP1     | ENSG00000168439 |
| 11059   | WWP1      | ENSG00000123124 |
| 139716  | GAB3      | ENSG00000160219 |
| 1399    | CRKL      | ENSG00000099942 |
| 142     | PARP1     | ENSG00000143799 |
| 1500    | CTNND1    | ENSG00000198561 |
| 1601    | DAB2      | ENSG00000153071 |
| 1639    | DCTN1     | ENSG00000204843 |
| 1655    | DDX5      | ENSG00000108654 |
| 1742    | DLG4      | ENSG00000132535 |
| 1822    | ATN1      | ENSG00000111676 |
| 1845    | DUSP3     | ENSG00000108861 |
| 2033    | EP300     | ENSG00000100393 |
| 2078    | ERG       | ENSG00000157554 |
| 2185    | PTK2B     | ENSG00000120899 |
| 2268    | FGR       | ENSG00000000938 |
| 2318    | FLNC      | ENSG00000128591 |
| 23607   | CD2AP     | ENSG00000198087 |
| 25      | ABL1      | ENSG00000097007 |
| 2665    | GDI2      | ENSG00000072135 |
| 266747  | RGL4      | ENSG00000057608 |
| 29992   | PILRA     | ENSG00000106070 |
| 3065    | HDAC1     | ENSG00000085514 |
| 324     | APC       | ENSG00000116478 |
| 328     | APEX1     | ENSG00000134982 |
| 338     | APOB      | ENSG00000100823 |
| 348     | APOE      | ENSG00000142166 |
| 354     | KLK3      | ENSG00000130203 |
| 3635    | INPP5D    | ENSG00000134352 |
| 3689    | ITGB2     | ENSG00000168918 |
| 369     | ARAF      | ENSG00000160255 |
| 3690    | ITGB3     | ENSG00000078061 |
| 3725    | JUN       | ENSG00000259207 |
| 3727    | JUND      | ENSG00000177606 |
| 3728    | JUP       | ENSG00000130522 |
| 3737    | KCNA2     | ENSG00000173801 |
| 3838    | KPNA2     | ENSG00000157404 |
| 387     | RHOA      | ENSG00000182481 |
| 388     | RHOB      | ENSG00000067560 |
| 389     | RHOC      | ENSG00000143878 |



|        |          |                 |
|--------|----------|-----------------|
| 3949   | LDLR     | ENSG00000155366 |
| 399687 | MYO18A   | ENSG00000130164 |
| 4035   | LRP1     | ENSG00000196535 |
| 4077   | NBR1     | ENSG00000254087 |
| 4086   | SMAD1    | ENSG00000188554 |
| 4087   | SMAD2    | ENSG00000170365 |
| 4088   | SMAD3    | ENSG00000175387 |
| 4089   | SMAD4    | ENSG00000166949 |
| 4090   | SMAD5    | ENSG00000141646 |
| 4092   | SMAD7    | ENSG00000113658 |
| 4093   | SMAD9    | ENSG00000101665 |
| 4752   | NEK3     | ENSG00000136997 |
| 4856   | NOV      | ENSG00000136098 |
| 5037   | PEBP1    | ENSG00000099985 |
| 5054   | SERPINE1 | ENSG00000089220 |
| 5076   | PAX2     | ENSG00000149269 |
| 5156   | PDGFRA   | ENSG00000132646 |
| 5175   | PECAM1   | ENSG00000113721 |
| 5291   | PIK3CB   | ENSG00000051382 |
| 5295   | PIK3R1   | ENSG00000145675 |
| 5311   | PKD2     | ENSG00000118762 |
| 5319   | PLA2G1B  | ENSG00000170890 |
| 5328   | PLAU     | ENSG00000122861 |
| 5335   | PLCG1    | ENSG00000124181 |
| 5347   | PLK1     | ENSG00000166851 |
| 5423   | POLB     | ENSG00000070501 |
| 5465   | PPARA    | ENSG00000186951 |
| 54893  | MTMR10   | ENSG00000166912 |
| 5494   | PPM1A    | ENSG00000100614 |
| 5552   | SRGN     | ENSG00000122862 |
| 5566   | PRKACA   | ENSG00000072062 |
| 55729  | ATF7IP   | ENSG00000171681 |
| 5575   | PRKAR1B  | ENSG00000188191 |
| 5576   | PRKAR2A  | ENSG00000114302 |
| 5578   | PRKCA    | ENSG00000154229 |
| 5579   | PRKCB    | ENSG00000166501 |
| 5580   | PRKCD    | ENSG00000163932 |
| 5594   | MAPK1    | ENSG00000100030 |
| 5595   | MAPK3    | ENSG00000102882 |
| 5604   | MAP2K1   | ENSG00000169032 |
| 5610   | EIF2AK2  | ENSG00000055332 |
| 5621   | PRNP     | ENSG00000171867 |
| 5684   | PSMA3    | ENSG00000100567 |
| 5747   | PTK2     | ENSG00000169398 |
| 5770   | PTPN1    | ENSG00000196396 |
| 5777   | PTPN6    | ENSG00000111679 |
| 5781   | PTPN11   | ENSG00000179295 |
| 5786   | PTPRA    | ENSG00000132670 |
| 5792   | PTPRF    | ENSG00000142949 |
| 5817   | PVR      | ENSG00000073008 |

|       |        |                 |
|-------|--------|-----------------|
| 5861  | RAB1A  | ENSG00000138069 |
| 5862  | RAB2A  | ENSG00000104388 |
| 5867  | RAB4A  | ENSG00000168118 |
| 5868  | RAB5A  | ENSG00000144566 |
| 5869  | RAB5B  | ENSG00000111540 |
| 5870  | RAB6A  | ENSG00000175582 |
| 5888  | RAD51  | ENSG00000051180 |
| 5898  | RALA   | ENSG00000006451 |
| 5899  | RALB   | ENSG00000144118 |
| 5906  | RAP1A  | ENSG00000116473 |
| 5911  | RAP2A  | ENSG00000125249 |
| 5925  | RB1    | ENSG00000139687 |
| 5966  | REL    | ENSG00000162924 |
| 6035  | RNASE1 | ENSG00000129538 |
| 6050  | RNH1   | ENSG00000023191 |
| 6237  | RRAS   | ENSG00000126458 |
| 6256  | RXRA   | ENSG00000186350 |
| 64326 | RFWD2  | ENSG00000143207 |
| 6464  | SHC1   | ENSG00000160691 |
| 64750 | SMURF2 | ENSG00000108854 |
| 6498  | SKIL   | ENSG00000136603 |
| 6667  | SP1    | ENSG00000185591 |
| 6688  | SPI1   | ENSG00000066336 |
| 6709  | SPTAN1 | ENSG00000197694 |
| 6714  | SRC    | ENSG00000197122 |
| 6850  | SYK    | ENSG00000165025 |
| 6908  | TBP    | ENSG00000112592 |
| 7006  | TEC    | ENSG00000135605 |
| 7020  | TFAP2A | ENSG00000137203 |
| 7026  | NR2F2  | ENSG00000185551 |
| 7057  | THBS1  | ENSG00000137801 |
| 7157  | TP53   | ENSG00000141510 |
| 7169  | TPM2   | ENSG00000198467 |
| 7297  | TYK2   | ENSG00000105397 |
| 7343  | UBTF   | ENSG00000108312 |
| 7409  | VAV1   | ENSG00000141968 |
| 7414  | VCL    | ENSG00000035403 |
| 7525  | YES1   | ENSG00000176105 |
| 7534  | YWHAZ  | ENSG00000164924 |
| 7805  | LAPTM5 | ENSG00000162511 |
| 836   | CASP3  | ENSG00000164305 |
| 8411  | EEA1   | ENSG00000102189 |
| 8440  | NCK2   | ENSG00000071051 |
| 8554  | PIAS1  | ENSG00000033800 |
| 8648  | NCOA1  | ENSG00000084676 |
| 867   | CBL    | ENSG00000110395 |
| 9093  | DNAJA3 | ENSG00000103423 |
| 9135  | RABEP1 | ENSG00000029725 |
| 920   | CD4    | ENSG00000010610 |
| 924   | CD7    | ENSG00000173762 |

|      |        |                 |
|------|--------|-----------------|
| 9372 | ZFYVE9 | ENSG00000157077 |
| 9564 | BCAR1  | ENSG00000050820 |
| 960  | CD44   | ENSG00000026508 |
| 9631 | NUP155 | ENSG00000113569 |
| 966  | CD59   | ENSG00000085063 |
| 9869 | SETDB1 | ENSG00000143379 |

**Supplementary Table 7.** Differentially expressed toxicity module genes in the treated cell lines. A negative fold change corresponds to a decreased expression in the treated cells compared to the untreated control cells.

| Gene ID | Gene Name | Ensembl ID      | log <sub>2</sub> (fold change) | p         | Cell line | Treatment   |
|---------|-----------|-----------------|--------------------------------|-----------|-----------|-------------|
| 2268    | FGR       | ENSG00000000938 | -2.84                          | 0.0215    | K562      | Carboplatin |
| 4086    | SMAD1     | ENSG00000170365 | -2.37                          | 0.000436  | K562      | Carboplatin |
| 3635    | INPP5D    | ENSG00000168918 | -1.35                          | 0.00165   | K562      | Carboplatin |
| 7409    | VAV1      | ENSG00000141968 | -1.2                           | 0.0216    | K562      | Carboplatin |
| 1601    | DAB2      | ENSG00000153071 | 0.76                           | 0.0273    | K562      | Carboplatin |
| 10140   | TOB1      | ENSG00000141232 | 0.77                           | 0.00805   | K562      | Carboplatin |
| 966     | CD59      | ENSG00000085063 | 0.98                           | 0.0225    | K562      | Carboplatin |
| 5008    | OSM       | ENSG00000099985 | 4.62                           | 0.0416    | K562      | Gemcitabine |
| 5159    | PDGFRB    | ENSG00000113721 | -6.06                          | 0.0123    | CMK       | Gemcitabine |
| 3725    | JUN       | ENSG00000177606 | 3.17                           | 0.0000714 | MOLM-1    | Carboplatin |
| 5319    | PLA2G1B   | ENSG00000170890 | -7.05                          | 0.0000568 | MOLM-1    | Gemcitabine |
| 2078    | ERG       | ENSG00000157554 | -0.8                           | 0.0428    | MOLM-1    | Gemcitabine |
| 5347    | PLK1      | ENSG00000166851 | 1.05                           | 0.0263    | MOLM-1    | Gemcitabine |
| 2887    | GRB10     | ENSG00000106070 | 1.21                           | 0.0106    | MOLM-1    | Gemcitabine |
| 5621    | PRNP      | ENSG00000171867 | 1.37                           | 0.0337    | MOLM-1    | Gemcitabine |
| 3725    | JUN       | ENSG00000177606 | 2.83                           | 0.000038  | MOLM-1    | Gemcitabine |
| 6035    | RNASE1    | ENSG00000129538 | 2.98                           | 0.0286    | MOLM-1    | Gemcitabine |
| 7057    | THBS1     | ENSG00000137801 | 3.03                           | 0.0415    | MOLM-1    | Gemcitabine |
| 348     | APOE      | ENSG00000130203 | 3.07                           | 0.00821   | MOLM-1    | Gemcitabine |

**Supplementary Table 8.** Enriched KEGG pathways and Gene Ontologies (GOs), with an FDR adjusted p-value < 0.01.

| ID       | Description                                              | GeneRatio | BackgroundRatio | p-value  | FDR adjusted p-value (p.adjust) | q-value  | geneID          | Count | Source |
|----------|----------------------------------------------------------|-----------|-----------------|----------|---------------------------------|----------|-----------------|-------|--------|
| hsa05205 | Proteoglycans in cancer                                  | 34/168    | 204/7888        | 1.52E-21 | 3.31E-19                        | 1.09E-19 | 369/387/595/836 | 34    | KEGG   |
| hsa04012 | ErbB signaling pathway                                   | 22/168    | 85/7888         | 1.67E-18 | 1.81E-16                        | 5.97E-17 | 25/369/867/1399 | 22    | KEGG   |
| hsa04015 | Rap1 signaling pathway                                   | 31/168    | 210/7888        | 4.43E-18 | 3.21E-16                        | 1.06E-16 | 387/999/1399/15 | 31    | KEGG   |
| hsa05220 | Chronic myeloid leukemia                                 | 20/168    | 76/7888         | 4.60E-17 | 2.50E-15                        | 8.23E-16 | 25/369/595/867/ | 20    | KEGG   |
| hsa05210 | Colorectal cancer                                        | 20/168    | 86/7888         | 6.44E-16 | 2.45E-14                        | 8.08E-15 | 324/369/387/595 | 20    | KEGG   |
| hsa04014 | Ras signaling pathway                                    | 30/168    | 232/7888        | 7.04E-16 | 2.45E-14                        | 8.08E-15 | 25/387/1969/381 | 30    | KEGG   |
| hsa04510 | Focal adhesion                                           | 28/168    | 199/7888        | 7.90E-16 | 2.45E-14                        | 8.08E-15 | 387/595/1399/20 | 28    | KEGG   |
| hsa04650 | Natural killer cell mediated cytotoxicity                | 23/168    | 131/7888        | 2.71E-15 | 7.36E-14                        | 2.43E-14 | 369/836/2185/34 | 23    | KEGG   |
| hsa05212 | Pancreatic cancer                                        | 18/168    | 75/7888         | 1.09E-14 | 2.36E-13                        | 7.80E-14 | 369/595/2064/40 | 18    | KEGG   |
| hsa05214 | Glioma                                                   | 18/168    | 75/7888         | 1.09E-14 | 2.36E-13                        | 7.80E-14 | 369/595/5156/51 | 18    | KEGG   |
| hsa05223 | Non-small cell lung cancer                               | 17/168    | 66/7888         | 1.72E-14 | 3.40E-13                        | 1.12E-13 | 369/595/2064/52 | 17    | KEGG   |
| hsa05161 | Hepatitis B                                              | 24/168    | 162/7888        | 3.42E-14 | 6.18E-13                        | 2.04E-13 | 369/836/2033/21 | 24    | KEGG   |
| hsa04666 | Fc gamma R-mediated phagocytosis                         | 19/168    | 93/7888         | 4.60E-14 | 7.67E-13                        | 2.53E-13 | 1399/3635/4067/ | 19    | KEGG   |
| hsa04520 | Adherens junction                                        | 17/168    | 71/7888         | 6.48E-14 | 1.00E-12                        | 3.31E-13 | 387/999/1500/20 | 17    | KEGG   |
| hsa04919 | Thyroid hormone signaling pathway                        | 20/168    | 119/7888        | 4.74E-13 | 6.86E-12                        | 2.26E-12 | 595/2033/3065/3 | 20    | KEGG   |
| hsa05215 | Prostate cancer                                          | 18/168    | 97/7888         | 1.28E-12 | 1.73E-11                        | 5.72E-12 | 354/369/595/203 | 18    | KEGG   |
| hsa04670 | Leukocyte transendothelial migration                     | 19/168    | 112/7888        | 1.59E-12 | 2.02E-11                        | 6.68E-12 | 387/1003/1500/2 | 19    | KEGG   |
| hsa04933 | AGE-RAGE signaling pathway in diabetic complications     | 18/168    | 100/7888        | 2.21E-12 | 2.67E-11                        | 8.79E-12 | 595/836/3725/40 | 18    | KEGG   |
| hsa05226 | Gastric cancer                                           | 21/168    | 149/7888        | 4.18E-12 | 4.77E-11                        | 1.57E-11 | 324/369/595/999 | 21    | KEGG   |
| hsa01521 | EGFR tyrosine kinase inhibitor resistance                | 16/168    | 79/7888         | 5.90E-12 | 6.40E-11                        | 2.11E-11 | 369/2064/5156/5 | 16    | KEGG   |
| hsa04062 | Chemokine signaling pathway                              | 23/168    | 189/7888        | 8.44E-12 | 8.72E-11                        | 2.88E-11 | 387/1399/2185/2 | 23    | KEGG   |
| hsa05160 | Hepatitis C                                              | 21/168    | 155/7888        | 9.11E-12 | 8.99E-11                        | 2.97E-11 | 369/595/836/345 | 21    | KEGG   |
| hsa05213 | Endometrial cancer                                       | 14/168    | 58/7888         | 1.03E-11 | 9.74E-11                        | 3.21E-11 | 324/369/595/999 | 14    | KEGG   |
| hsa01522 | Endocrine resistance                                     | 17/168    | 98/7888         | 1.74E-11 | 1.57E-10                        | 5.19E-11 | 369/595/2064/37 | 17    | KEGG   |
| hsa05219 | Bladder cancer                                           | 12/168    | 41/7888         | 2.72E-11 | 2.36E-10                        | 7.78E-11 | 369/595/999/206 | 12    | KEGG   |
| hsa05203 | Viral carcinogenesis                                     | 23/168    | 201/7888        | 3.05E-11 | 2.49E-10                        | 8.22E-11 | 387/595/836/203 | 23    | KEGG   |
| hsa04072 | Phospholipase D signaling pathway                        | 20/168    | 148/7888        | 3.10E-11 | 2.49E-10                        | 8.22E-11 | 387/2147/2185/3 | 20    | KEGG   |
| hsa04660 | T cell receptor signaling pathway                        | 17/168    | 103/7888        | 3.99E-11 | 3.09E-10                        | 1.02E-10 | 387/920/3725/50 | 17    | KEGG   |
| hsa05225 | Hepatocellular carcinoma                                 | 21/168    | 168/7888        | 4.38E-11 | 3.28E-10                        | 1.08E-10 | 324/369/595/408 | 21    | KEGG   |
| hsa05163 | Human cytomegalovirus infection                          | 24/168    | 225/7888        | 4.91E-11 | 3.55E-10                        | 1.17E-10 | 387/595/836/139 | 24    | KEGG   |
| hsa05206 | MicroRNAs in cancer                                      | 28/168    | 310/7888        | 5.65E-11 | 3.96E-10                        | 1.31E-10 | 25/324/387/595/ | 28    | KEGG   |
| hsa04350 | TGF-beta signaling pathway                               | 16/168    | 94/7888         | 9.53E-11 | 6.32E-10                        | 2.09E-10 | 387/2033/4086/4 | 16    | KEGG   |
| hsa04010 | MAPK signaling pathway                                   | 27/168    | 295/7888        | 9.61E-11 | 6.32E-10                        | 2.09E-10 | 369/836/1399/18 | 27    | KEGG   |
| hsa05224 | Breast cancer                                            | 19/168    | 147/7888        | 2.19E-10 | 1.40E-09                        | 4.62E-10 | 324/369/595/206 | 19    | KEGG   |
| hsa05218 | Melanoma                                                 | 14/168    | 72/7888         | 2.35E-10 | 1.46E-09                        | 4.80E-10 | 369/595/999/515 | 14    | KEGG   |
| hsa05167 | Kaposi sarcoma-associated herpesvirus infection          | 21/168    | 186/7888        | 3.05E-10 | 1.84E-09                        | 6.06E-10 | 595/836/2033/34 | 21    | KEGG   |
| hsa05135 | Yersinia infection                                       | 17/168    | 121/7888        | 5.52E-10 | 3.23E-09                        | 1.07E-09 | 387/1399/2185/3 | 17    | KEGG   |
| hsa04810 | Regulation of actin cytoskeleton                         | 22/168    | 213/7888        | 6.31E-10 | 3.60E-09                        | 1.19E-09 | 324/369/387/139 | 22    | KEGG   |
| hsa04664 | Fc epsilon RI signaling pathway                          | 13/168    | 68/7888         | 1.32E-09 | 7.36E-09                        | 2.43E-09 | 3635/4067/5291/ | 13    | KEGG   |
| hsa04662 | B cell receptor signaling pathway                        | 14/168    | 82/7888         | 1.44E-09 | 7.80E-09                        | 2.57E-09 | 3635/3725/4067/ | 14    | KEGG   |
| hsa05211 | Renal cell carcinoma                                     | 13/168    | 69/7888         | 1.60E-09 | 8.47E-09                        | 2.79E-09 | 369/1399/2033/3 | 13    | KEGG   |
| hsa04370 | VEGF signaling pathway                                   | 12/168    | 59/7888         | 2.76E-09 | 1.43E-08                        | 4.71E-09 | 5291/5295/5335/ | 12    | KEGG   |
| hsa04722 | Neurotrophin signaling pathway                           | 16/168    | 119/7888        | 3.53E-09 | 1.78E-08                        | 5.87E-09 | 25/387/1399/372 | 16    | KEGG   |
| hsa04910 | Insulin signaling pathway                                | 17/168    | 137/7888        | 3.92E-09 | 1.93E-08                        | 6.37E-09 | 369/867/1399/52 | 17    | KEGG   |
| hsa04550 | Signaling pathways regulating pluripotency of stem cells | 17/168    | 140/7888        | 5.48E-09 | 2.64E-08                        | 8.72E-09 | 324/3572/4086/4 | 17    | KEGG   |
| hsa05166 | Human T-cell leukemia virus 1 infection                  | 21/168    | 219/7888        | 6.19E-09 | 2.92E-08                        | 9.63E-09 | 595/920/2033/36 | 21    | KEGG   |
| hsa05221 | Acute myeloid leukemia                                   | 12/168    | 66/7888         | 1.07E-08 | 4.93E-08                        | 1.63E-08 | 369/595/3728/38 | 12    | KEGG   |

|          |                                                        |        |          |          |          |          |                 |    |      |
|----------|--------------------------------------------------------|--------|----------|----------|----------|----------|-----------------|----|------|
| hsa05231 | Choline metabolism in cancer                           | 14/168 | 98/7888  | 1.59E-08 | 7.18E-08 | 2.37E-08 | 3725/5156/5159/ | 14 | KEGG |
| hsa05230 | Central carbon metabolism in cancer                    | 12/168 | 69/7888  | 1.81E-08 | 8.01E-08 | 2.64E-08 | 2064/3815/4609/ | 12 | KEGG |
| hsa05100 | Bacterial invasion of epithelial cells                 | 12/168 | 73/7888  | 3.51E-08 | 1.52E-07 | 5.02E-08 | 387/867/999/139 | 12 | KEGG |
| hsa05216 | Thyroid cancer                                         | 9/168  | 37/7888  | 5.43E-08 | 2.31E-07 | 7.62E-08 | 595/999/4609/55 | 9  | KEGG |
| hsa04068 | FoxO signaling pathway                                 | 15/168 | 131/7888 | 1.01E-07 | 4.21E-07 | 1.39E-07 | 369/595/2033/40 | 15 | KEGG |
| hsa04625 | C-type lectin receptor signaling pathway               | 13/168 | 104/7888 | 2.65E-07 | 1.09E-06 | 3.58E-07 | 387/3725/5058/5 | 13 | KEGG |
| hsa04630 | JAK-STAT signaling pathway                             | 16/168 | 162/7888 | 2.96E-07 | 1.19E-06 | 3.93E-07 | 595/2033/3454/3 | 16 | KEGG |
| hsa04110 | Cell cycle                                             | 14/168 | 124/7888 | 3.27E-07 | 1.26E-06 | 4.16E-07 | 25/595/2033/306 | 14 | KEGG |
| hsa04611 | Platelet activation                                    | 14/168 | 124/7888 | 3.27E-07 | 1.26E-06 | 4.16E-07 | 387/2147/3690/4 | 14 | KEGG |
| hsa04928 | Parathyroid hormone synthesis, secretion and action    | 13/168 | 106/7888 | 3.33E-07 | 1.26E-06 | 4.16E-07 | 369/387/846/372 | 13 | KEGG |
| hsa05235 | PD-L1 expression and PD-1 checkpoint pathway in cancer | 12/168 | 89/7888  | 3.37E-07 | 1.26E-06 | 4.16E-07 | 920/3725/5291/5 | 12 | KEGG |
| hsa04151 | PI3K-Akt signaling pathway                             | 24/168 | 354/7888 | 4.02E-07 | 1.48E-06 | 4.87E-07 | 595/1969/2064/3 | 24 | KEGG |
| hsa04931 | Insulin resistance                                     | 13/168 | 108/7888 | 4.15E-07 | 1.50E-06 | 4.95E-07 | 5291/5295/5465/ | 13 | KEGG |
| hsa05165 | Human papillomavirus infection                         | 23/168 | 330/7888 | 4.41E-07 | 1.57E-06 | 5.18E-07 | 324/595/836/203 | 23 | KEGG |
| hsa04066 | HIF-1 signaling pathway                                | 13/168 | 109/7888 | 4.63E-07 | 1.62E-06 | 5.34E-07 | 2033/2064/5054/ | 13 | KEGG |
| hsa04380 | Osteoclast differentiation                             | 14/168 | 128/7888 | 4.86E-07 | 1.67E-06 | 5.52E-07 | 3454/3690/3725/ | 14 | KEGG |
| hsa04610 | Complement and coagulation cascades                    | 11/168 | 79/7888  | 7.61E-07 | 2.58E-06 | 8.51E-07 | 966/2147/2157/3 | 11 | KEGG |
| hsa04371 | Apelin signaling pathway                               | 14/168 | 137/7888 | 1.12E-06 | 3.74E-06 | 1.23E-06 | 595/999/4087/40 | 14 | KEGG |
| hsa05169 | Epstein-Barr virus infection                           | 17/168 | 201/7888 | 1.14E-06 | 3.76E-06 | 1.24E-06 | 595/836/960/306 | 17 | KEGG |
| hsa04720 | Long-term potentiation                                 | 10/168 | 67/7888  | 1.28E-06 | 4.10E-06 | 1.35E-06 | 369/2033/5566/5 | 10 | KEGG |
| hsa04071 | Sphingolipid signaling pathway                         | 13/168 | 119/7888 | 1.28E-06 | 4.10E-06 | 1.35E-06 | 387/5291/5295/5 | 13 | KEGG |
| hsa04360 | Axon guidance                                          | 16/168 | 181/7888 | 1.34E-06 | 4.21E-06 | 1.39E-06 | 25/387/1969/505 | 16 | KEGG |
| hsa04218 | Cellular senescence                                    | 15/168 | 160/7888 | 1.39E-06 | 4.29E-06 | 1.42E-06 | 595/4087/4088/4 | 15 | KEGG |
| hsa05146 | Amoebiasis                                             | 12/168 | 102/7888 | 1.51E-06 | 4.61E-06 | 1.52E-06 | 836/3689/5291/5 | 12 | KEGG |
| hsa04917 | Prolactin signaling pathway                            | 10/168 | 70/7888  | 1.94E-06 | 5.84E-06 | 1.93E-06 | 595/5291/5295/5 | 10 | KEGG |
| hsa05170 | Human immunodeficiency virus 1 infection               | 17/168 | 212/7888 | 2.40E-06 | 7.12E-06 | 2.35E-06 | 836/920/1399/21 | 17 | KEGG |
| hsa04659 | Th17 cell differentiation                              | 12/168 | 107/7888 | 2.52E-06 | 7.40E-06 | 2.44E-06 | 920/3572/3725/4 | 12 | KEGG |
| hsa04024 | cAMP signaling pathway                                 | 17/168 | 214/7888 | 2.73E-06 | 7.88E-06 | 2.60E-06 | 387/2033/2737/3 | 17 | KEGG |
| hsa05164 | Influenza A                                            | 15/168 | 170/7888 | 2.98E-06 | 8.51E-06 | 2.81E-06 | 836/2033/3454/3 | 15 | KEGG |
| hsa04926 | Relaxin signaling pathway                              | 13/168 | 129/7888 | 3.22E-06 | 9.07E-06 | 2.99E-06 | 3725/4087/5291/ | 13 | KEGG |
| hsa05222 | Small cell lung cancer                                 | 11/168 | 93/7888  | 3.97E-06 | 1.10E-05 | 3.64E-06 | 595/836/4609/52 | 11 | KEGG |
| hsa04270 | Vascular smooth muscle contraction                     | 13/168 | 132/7888 | 4.17E-06 | 1.14E-05 | 3.78E-06 | 369/387/5319/53 | 13 | KEGG |
| hsa04390 | Hippo signaling pathway                                | 14/168 | 154/7888 | 4.55E-06 | 1.23E-05 | 4.07E-06 | 324/595/999/174 | 14 | KEGG |
| hsa04930 | Type II diabetes mellitus                              | 8/168  | 46/7888  | 4.69E-06 | 1.26E-05 | 4.15E-06 | 5291/5295/5580/ | 8  | KEGG |
| hsa04915 | Estrogen signaling pathway                             | 13/168 | 138/7888 | 6.83E-06 | 1.81E-05 | 5.97E-06 | 3725/5291/5295/ | 13 | KEGG |
| hsa04929 | GnRH secretion                                         | 9/168  | 64/7888  | 7.34E-06 | 1.91E-05 | 6.31E-06 | 5291/5295/5578/ | 9  | KEGG |
| hsa05418 | Fluid shear stress and atherosclerosis                 | 13/168 | 139/7888 | 7.40E-06 | 1.91E-05 | 6.31E-06 | 387/1003/3690/3 | 13 | KEGG |
| hsa05202 | Transcriptional misregulation in cancer                | 15/168 | 186/7888 | 9.04E-06 | 2.31E-05 | 7.61E-06 | 1655/2078/3065/ | 15 | KEGG |
| hsa04960 | Aldosterone-regulated sodium reabsorption              | 7/168  | 37/7888  | 1.05E-05 | 2.66E-05 | 8.77E-06 | 5291/5295/5578/ | 7  | KEGG |
| hsa04144 | Endocytosis                                            | 17/168 | 243/7888 | 1.50E-05 | 3.74E-05 | 1.23E-05 | 387/867/1601/39 | 17 | KEGG |
| hsa04540 | Gap junction                                           | 10/168 | 88/7888  | 1.58E-05 | 3.91E-05 | 1.29E-05 | 5156/5159/5566/ | 10 | KEGG |
| hsa04912 | GnRH signaling pathway                                 | 10/168 | 93/7888  | 2.59E-05 | 6.31E-05 | 2.08E-05 | 2185/3725/5566/ | 10 | KEGG |
| hsa04210 | Apoptosis                                              | 12/168 | 136/7888 | 3.03E-05 | 7.30E-05 | 2.41E-05 | 142/836/3725/52 | 12 | KEGG |
| hsa04310 | Wnt signaling pathway                                  | 13/168 | 160/7888 | 3.38E-05 | 8.07E-05 | 2.66E-05 | 324/387/595/203 | 13 | KEGG |
| hsa04730 | Long-term depression                                   | 8/168  | 60/7888  | 3.57E-05 | 8.42E-05 | 2.78E-05 | 369/4067/5578/5 | 8  | KEGG |
| hsa04750 | Inflammatory mediator regulation of TRP channels       | 10/168 | 100/7888 | 4.88E-05 | 1.14E-04 | 3.75E-05 | 5291/5295/5335/ | 10 | KEGG |
| hsa05020 | Prion diseases                                         | 6/168  | 35/7888  | 8.30E-05 | 1.92E-04 | 6.32E-05 | 5566/5594/5595/ | 6  | KEGG |
| hsa04725 | Cholinergic synapse                                    | 10/168 | 112/7888 | 1.28E-04 | 2.92E-04 | 9.65E-05 | 5291/5295/5566/ | 10 | KEGG |
| hsa01524 | Platinum drug resistance                               | 8/168  | 73/7888  | 1.48E-04 | 3.35E-04 | 1.11E-04 | 836/2064/5291/5 | 8  | KEGG |

|            |                                                                          |        |           |          |          |          |                 |    |      |
|------------|--------------------------------------------------------------------------|--------|-----------|----------|----------|----------|-----------------|----|------|
| hsa04914   | Progesterone-mediated oocyte maturation                                  | 9/168  | 99/7888   | 2.44E-04 | 5.46E-04 | 1.80E-04 | 369/5291/5295/5 | 9  | KEGG |
| hsa04916   | Melanogenesis                                                            | 9/168  | 101/7888  | 2.84E-04 | 6.28E-04 | 2.07E-04 | 2033/3815/5566/ | 9  | KEGG |
| hsa04150   | mTOR signaling pathway                                                   | 11/168 | 153/7888  | 4.03E-04 | 8.75E-04 | 2.89E-04 | 387/2887/5291/5 | 11 | KEGG |
| hsa04921   | Oxytocin signaling pathway                                               | 11/168 | 153/7888  | 4.03E-04 | 8.75E-04 | 2.89E-04 | 387/595/3725/55 | 11 | KEGG |
| hsa05152   | Tuberculosis                                                             | 12/168 | 179/7888  | 4.19E-04 | 9.01E-04 | 2.97E-04 | 387/836/2033/36 | 12 | KEGG |
| hsa05131   | Shigellosis                                                              | 7/168  | 67/7888   | 5.21E-04 | 1.11E-03 | 3.65E-04 | 25/960/1399/559 | 7  | KEGG |
| hsa04140   | Autophagy - animal                                                       | 10/168 | 137/7888  | 6.57E-04 | 1.38E-03 | 4.57E-04 | 5291/5295/5566/ | 10 | KEGG |
| hsa05120   | Epithelial cell signaling in Helicobacter pylori infection               | 7/168  | 70/7888   | 6.81E-04 | 1.42E-03 | 4.68E-04 | 836/3725/4067/5 | 7  | KEGG |
| hsa05162   | Measles                                                                  | 10/168 | 138/7888  | 6.96E-04 | 1.44E-03 | 4.74E-04 | 595/836/3454/37 | 10 | KEGG |
| hsa04726   | Serotonergic synapse                                                     | 9/168  | 115/7888  | 7.41E-04 | 1.52E-03 | 5.01E-04 | 369/836/5566/55 | 9  | KEGG |
| hsa04115   | p53 signaling pathway                                                    | 7/168  | 72/7888   | 8.07E-04 | 1.64E-03 | 5.40E-04 | 595/836/5054/70 | 7  | KEGG |
| hsa05130   | Pathogenic Escherichia coli infection                                    | 6/168  | 54/7888   | 9.46E-04 | 1.90E-03 | 6.27E-04 | 25/387/999/5578 | 6  | KEGG |
| hsa05133   | Pertussis                                                                | 7/168  | 76/7888   | 1.12E-03 | 2.22E-03 | 7.33E-04 | 387/836/3689/37 | 7  | KEGG |
| hsa04972   | Pancreatic secretion                                                     | 8/168  | 102/7888  | 1.44E-03 | 2.81E-03 | 9.26E-04 | 387/5319/5320/5 | 8  | KEGG |
| hsa05142   | Chagas disease (American trypanosomiasis)                                | 8/168  | 102/7888  | 1.44E-03 | 2.81E-03 | 9.26E-04 | 3725/4087/5054/ | 8  | KEGG |
| hsa04620   | Toll-like receptor signaling pathway                                     | 8/168  | 104/7888  | 1.63E-03 | 3.15E-03 | 1.04E-03 | 3454/3725/5291/ | 8  | KEGG |
| hsa04934   | Cushing syndrome                                                         | 10/168 | 155/7888  | 1.69E-03 | 3.25E-03 | 1.07E-03 | 324/595/3949/55 | 10 | KEGG |
| hsa04137   | Mitophagy - animal                                                       | 6/168  | 65/7888   | 2.50E-03 | 4.75E-03 | 1.57E-03 | 3725/4077/6237/ | 6  | KEGG |
| hsa04668   | TNF signaling pathway                                                    | 8/168  | 112/7888  | 2.60E-03 | 4.91E-03 | 1.62E-03 | 836/3725/5291/5 | 8  | KEGG |
| hsa05031   | Amphetamine addiction                                                    | 6/168  | 68/7888   | 3.14E-03 | 5.87E-03 | 1.94E-03 | 3065/3725/5566/ | 6  | KEGG |
| hsa04530   | Tight junction                                                           | 10/168 | 169/7888  | 3.20E-03 | 5.93E-03 | 1.96E-03 | 387/595/2064/37 | 10 | KEGG |
| hsa04658   | Th1 and Th2 cell differentiation                                         | 7/168  | 92/7888   | 3.37E-03 | 6.19E-03 | 2.04E-03 | 920/3725/5335/5 | 7  | KEGG |
| hsa03410   | Base excision repair                                                     | 4/168  | 33/7888   | 5.02E-03 | 9.14E-03 | 3.01E-03 | 142/328/5111/54 | 4  | KEGG |
| hsa04070   | Phosphatidylinositol signaling system                                    | 7/168  | 99/7888   | 5.05E-03 | 9.14E-03 | 3.01E-03 | 3635/5291/5295/ | 7  | KEGG |
| hsa05140   | Leishmaniasis                                                            | 6/168  | 76/7888   | 5.45E-03 | 9.78E-03 | 3.23E-03 | 3689/3725/5579/ | 6  | KEGG |
| GO:0050817 | coagulation                                                              | 40/212 | 337/17913 | 1.44E-28 | 5.91E-25 | 3.06E-25 | APOE/CD59/F2/F  | 40 | GO   |
| GO:0007596 | blood coagulation                                                        | 38/212 | 331/17913 | 1.31E-26 | 2.69E-23 | 1.39E-23 | APOE/CD59/F2/F  | 38 | GO   |
| GO:0007599 | hemostasis                                                               | 38/212 | 336/17913 | 2.29E-26 | 3.13E-23 | 1.62E-23 | APOE/CD59/F2/F  | 38 | GO   |
| GO:0018108 | peptidyl-tyrosine phosphorylation                                        | 38/212 | 346/17913 | 6.76E-26 | 6.93E-23 | 3.59E-23 | ABL1/CD4/CD44/  | 38 | GO   |
| GO:0018212 | peptidyl-tyrosine modification                                           | 38/212 | 349/17913 | 9.29E-26 | 7.62E-23 | 3.95E-23 | ABL1/CD4/CD44/  | 38 | GO   |
| GO:0050878 | regulation of body fluid levels                                          | 42/212 | 499/17913 | 5.37E-24 | 3.67E-21 | 1.90E-21 | APOE/CCND1/CD   | 42 | GO   |
| GO:0070371 | ERK1 and ERK2 cascade                                                    | 33/212 | 289/17913 | 4.36E-23 | 2.56E-20 | 1.32E-20 | ABL1/APOE/CASF  | 33 | GO   |
| GO:0070372 | regulation of ERK1 and ERK2 cascade                                      | 31/212 | 271/17913 | 9.49E-22 | 4.86E-19 | 2.52E-19 | ABL1/APOE/CASF  | 31 | GO   |
| GO:0071900 | regulation of protein serine/threonine kinase activity                   | 38/212 | 479/17913 | 7.92E-21 | 3.61E-18 | 1.87E-18 | ABL1/APC/APOE/  | 38 | GO   |
| GO:0030168 | platelet activation                                                      | 24/212 | 152/17913 | 2.23E-20 | 9.16E-18 | 4.74E-18 | APOE/F2/F8/ITGE | 24 | GO   |
| GO:0002768 | immune response-regulating cell surface receptor signaling pathway       | 34/212 | 434/17913 | 1.62E-18 | 6.05E-16 | 3.13E-16 | ABL1/CD4/CRKL/I | 34 | GO   |
| GO:0007179 | transforming growth factor beta receptor signaling pathway               | 24/212 | 184/17913 | 2.24E-18 | 7.65E-16 | 3.97E-16 | PARP1/RHOA/CB   | 24 | GO   |
| GO:0071560 | cellular response to transforming growth factor beta stimulus            | 26/212 | 233/17913 | 4.21E-18 | 1.27E-15 | 6.60E-16 | PARP1/RHOA/CB   | 26 | GO   |
| GO:0022407 | regulation of cell-cell adhesion                                         | 32/212 | 389/17913 | 4.35E-18 | 1.27E-15 | 6.60E-16 | ABL1/RHOA/CASI  | 32 | GO   |
| GO:0006909 | phagocytosis                                                             | 29/212 | 308/17913 | 4.77E-18 | 1.30E-15 | 6.76E-16 | ABL1/FGR/ITGB2, | 29 | GO   |
| GO:0071559 | response to transforming growth factor beta                              | 26/212 | 239/17913 | 7.96E-18 | 2.04E-15 | 1.06E-15 | PARP1/RHOA/CB   | 26 | GO   |
| GO:0007178 | transmembrane receptor protein serine/threonine kinase signaling pathway | 29/212 | 323/17913 | 1.74E-17 | 4.20E-15 | 2.17E-15 | ABL1/PARP1/RHC  | 29 | GO   |
| GO:0002429 | immune response-activating cell surface receptor signaling pathway       | 31/212 | 399/17913 | 7.68E-17 | 1.75E-14 | 9.07E-15 | ABL1/CD4/CRKL/I | 31 | GO   |
| GO:0043410 | positive regulation of MAPK cascade                                      | 34/212 | 499/17913 | 1.17E-16 | 2.52E-14 | 1.31E-14 | ABL1/APOE/CASF  | 34 | GO   |
| GO:0050730 | regulation of peptidyl-tyrosine phosphorylation                          | 25/212 | 245/17913 | 1.64E-16 | 3.37E-14 | 1.74E-14 | ABL1/CD4/CD44/  | 25 | GO   |
| GO:1901653 | cellular response to peptide                                             | 29/212 | 364/17913 | 4.28E-16 | 8.35E-14 | 4.33E-14 | ACTN2/PARP1/AF  | 29 | GO   |
| GO:0061564 | axon development                                                         | 31/212 | 438/17913 | 1.04E-15 | 1.95E-13 | 1.01E-13 | ABL1/APOE/RHO,  | 31 | GO   |
| GO:1903037 | regulation of leukocyte cell-cell adhesion                               | 26/212 | 295/17913 | 1.42E-15 | 2.37E-13 | 1.23E-13 | RHOA/CASP3/CD-  | 26 | GO   |
| GO:0042110 | T cell activation                                                        | 31/212 | 443/17913 | 1.43E-15 | 2.37E-13 | 1.23E-13 | ABL1/RHOA/CASI  | 31 | GO   |

|            |                                                                                             |        |           |          |          |          |                 |       |
|------------|---------------------------------------------------------------------------------------------|--------|-----------|----------|----------|----------|-----------------|-------|
| GO:1903034 | regulation of response to wounding                                                          | 21/212 | 173/17913 | 1.45E-15 | 2.37E-13 | 1.23E-13 | APOE/F2/LRP1/LY | 21 GO |
| GO:0007159 | leukocyte cell-cell adhesion                                                                | 27/212 | 328/17913 | 2.13E-15 | 3.36E-13 | 1.74E-13 | RHOA/CASP3/CD4  | 27 GO |
| GO:0045785 | positive regulation of cell adhesion                                                        | 29/212 | 388/17913 | 2.30E-15 | 3.49E-13 | 1.81E-13 | ABL1/RHOA/CD4   | 29 GO |
| GO:0002694 | regulation of leukocyte activation                                                          | 32/212 | 492/17913 | 3.79E-15 | 5.54E-13 | 2.87E-13 | ABL1/RHOA/CAS   | 32 GO |
| GO:0032386 | regulation of intracellular transport                                                       | 29/212 | 400/17913 | 5.10E-15 | 7.20E-13 | 3.73E-13 | ACTN2/CDH1/DA   | 29 GO |
| GO:0030193 | regulation of blood coagulation                                                             | 15/212 | 74/17913  | 7.50E-15 | 1.02E-12 | 5.31E-13 | APOE/F2/LYN/SEI | 15 GO |
| GO:1900046 | regulation of hemostasis                                                                    | 15/212 | 75/17913  | 9.28E-15 | 1.23E-12 | 6.36E-13 | APOE/F2/LYN/SEI | 15 GO |
| GO:0043405 | regulation of MAP kinase activity                                                           | 26/212 | 322/17913 | 1.16E-14 | 1.48E-12 | 7.68E-13 | APOE/CRKL/DUSF  | 26 GO |
| GO:0038093 | Fc receptor signaling pathway                                                               | 23/212 | 241/17913 | 1.22E-14 | 1.52E-12 | 7.87E-13 | ABL1/FGR/JUN/K  | 23 GO |
| GO:0071375 | cellular response to peptide hormone stimulus                                               | 25/212 | 297/17913 | 1.49E-14 | 1.80E-12 | 9.33E-13 | ACTN2/PARP1/AF  | 25 GO |
| GO:0050818 | regulation of coagulation                                                                   | 15/212 | 79/17913  | 2.10E-14 | 2.47E-12 | 1.28E-12 | APOE/F2/LYN/SEI | 15 GO |
| GO:1901652 | response to peptide                                                                         | 31/212 | 491/17913 | 2.38E-14 | 2.68E-12 | 1.39E-12 | ACTN2/PARP1/AF  | 31 GO |
| GO:0007409 | axonogenesis                                                                                | 28/212 | 393/17913 | 2.42E-14 | 2.68E-12 | 1.39E-12 | ABL1/APOE/RHO   | 28 GO |
| GO:0034330 | cell junction organization                                                                  | 24/212 | 277/17913 | 2.74E-14 | 2.95E-12 | 1.53E-12 | ABL1/ACTN2/APC  | 24 GO |
| GO:0050863 | regulation of T cell activation                                                             | 25/212 | 307/17913 | 3.20E-14 | 3.36E-12 | 1.74E-12 | ABL1/RHOA/CAS   | 25 GO |
| GO:0050900 | leukocyte migration                                                                         | 30/212 | 467/17913 | 4.13E-14 | 4.24E-12 | 2.19E-12 | APOB/RHOA/CD4   | 30 GO |
| GO:0051222 | positive regulation of protein transport                                                    | 28/212 | 403/17913 | 4.54E-14 | 4.54E-12 | 2.35E-12 | ABL1/CASR/CDH1  | 28 GO |
| GO:0002433 | immune response-regulating cell surface receptor signaling pathway involved in phagocytosis | 18/212 | 139/17913 | 5.29E-14 | 5.04E-12 | 2.61E-12 | ABL1/FGR/LYN/P  | 18 GO |
| GO:0038096 | Fc-gamma receptor signaling pathway involved in phagocytosis                                | 18/212 | 139/17913 | 5.29E-14 | 5.04E-12 | 2.61E-12 | ABL1/FGR/LYN/P  | 18 GO |
| GO:1904951 | positive regulation of establishment of protein localization                                | 29/212 | 440/17913 | 5.94E-14 | 5.54E-12 | 2.87E-12 | ABL1/CASR/CDH1  | 29 GO |
| GO:0038094 | Fc-gamma receptor signaling pathway                                                         | 18/212 | 141/17913 | 6.82E-14 | 6.21E-12 | 3.22E-12 | ABL1/FGR/LYN/P  | 18 GO |
| GO:1903829 | positive regulation of cellular protein localization                                        | 25/212 | 318/17913 | 7.14E-14 | 6.36E-12 | 3.30E-12 | PARP1/APC/CDH   | 25 GO |
| GO:0070374 | positive regulation of ERK1 and ERK2 cascade                                                | 20/212 | 186/17913 | 7.38E-14 | 6.44E-12 | 3.34E-12 | ABL1/APOE/CASF  | 20 GO |
| GO:0002431 | Fc receptor mediated stimulatory signaling pathway                                          | 18/212 | 142/17913 | 7.73E-14 | 6.60E-12 | 3.42E-12 | ABL1/FGR/LYN/P  | 18 GO |
| GO:0061041 | regulation of wound healing                                                                 | 18/212 | 143/17913 | 8.75E-14 | 7.32E-12 | 3.79E-12 | APOE/F2/LYN/SV  | 18 GO |
| GO:0031589 | cell-substrate adhesion                                                                     | 25/212 | 322/17913 | 9.48E-14 | 7.77E-12 | 4.03E-12 | ABL1/ACTN2/RHC  | 25 GO |
| GO:0007160 | cell-matrix adhesion                                                                        | 21/212 | 214/17913 | 1.06E-13 | 8.35E-12 | 4.32E-12 | ABL1/ACTN2/RHC  | 21 GO |
| GO:0034329 | cell junction assembly                                                                      | 21/212 | 214/17913 | 1.06E-13 | 8.35E-12 | 4.32E-12 | ABL1/ACTN2/APC  | 21 GO |
| GO:0010631 | epithelial cell migration                                                                   | 26/212 | 354/17913 | 1.08E-13 | 8.35E-12 | 4.32E-12 | ABL1/APOE/RHO   | 26 GO |
| GO:0002521 | leukocyte differentiation                                                                   | 30/212 | 485/17913 | 1.11E-13 | 8.44E-12 | 4.37E-12 | ABL1/PARP1/RHC  | 30 GO |
| GO:0090132 | epithelium migration                                                                        | 26/212 | 357/17913 | 1.31E-13 | 9.80E-12 | 5.07E-12 | ABL1/APOE/RHO   | 26 GO |
| GO:0090130 | tissue migration                                                                            | 26/212 | 363/17913 | 1.94E-13 | 1.42E-11 | 7.35E-12 | ABL1/APOE/RHO   | 26 GO |
| GO:0032147 | activation of protein kinase activity                                                       | 24/212 | 303/17913 | 1.98E-13 | 1.42E-11 | 7.37E-12 | ABL1/CRKL/PTK2I | 24 GO |
| GO:0048667 | cell morphogenesis involved in neuron differentiation                                       | 30/212 | 500/17913 | 2.45E-13 | 1.73E-11 | 8.97E-12 | ABL1/APOE/RHO   | 30 GO |
| GO:0043434 | response to peptide hormone                                                                 | 27/212 | 404/17913 | 3.38E-13 | 2.35E-11 | 1.22E-11 | ACTN2/PARP1/AF  | 27 GO |
| GO:0034332 | adherens junction organization                                                              | 17/212 | 134/17913 | 3.84E-13 | 2.62E-11 | 1.36E-11 | ABL1/ACTN2/RHC  | 17 GO |
| GO:0060627 | regulation of vesicle-mediated transport                                                    | 29/212 | 480/17913 | 5.36E-13 | 3.60E-11 | 1.87E-11 | ABL1/ACTN2/APC  | 29 GO |
| GO:0001667 | ameboidal-type cell migration                                                               | 28/212 | 446/17913 | 5.51E-13 | 3.64E-11 | 1.89E-11 | ABL1/APOE/RHO   | 28 GO |
| GO:0007411 | axon guidance                                                                               | 20/212 | 210/17913 | 7.39E-13 | 4.68E-11 | 2.42E-11 | ERBB2/GLI3/GRB  | 20 GO |
| GO:0046777 | protein autophosphorylation                                                                 | 20/212 | 210/17913 | 7.39E-13 | 4.68E-11 | 2.42E-11 | ABL1/ERBB2/PTK  | 20 GO |
| GO:0071902 | positive regulation of protein serine/threonine kinase activity                             | 24/212 | 322/17913 | 7.41E-13 | 4.68E-11 | 2.42E-11 | RHOA/CCND1/CR   | 24 GO |
| GO:0097485 | neuron projection guidance                                                                  | 20/212 | 212/17913 | 8.83E-13 | 5.49E-11 | 2.84E-11 | ERBB2/GLI3/GRB  | 20 GO |
| GO:1903039 | positive regulation of leukocyte cell-cell adhesion                                         | 20/212 | 214/17913 | 1.05E-12 | 6.45E-11 | 3.34E-11 | RHOA/CD4/CD44   | 20 GO |
| GO:0007264 | small GTPase mediated signal transduction                                                   | 28/212 | 465/17913 | 1.51E-12 | 9.13E-11 | 4.73E-11 | ABL1/APOE/RHO   | 28 GO |
| GO:1903706 | regulation of hemopoiesis                                                                   | 28/212 | 468/17913 | 1.77E-12 | 1.05E-10 | 5.44E-11 | ABL1/RHOA/CD4   | 28 GO |
| GO:0051249 | regulation of lymphocyte activation                                                         | 26/212 | 401/17913 | 1.91E-12 | 1.12E-10 | 5.80E-11 | ABL1/RHOA/CAS   | 26 GO |
| GO:0022409 | positive regulation of cell-cell adhesion                                                   | 21/212 | 251/17913 | 2.41E-12 | 1.39E-10 | 7.20E-11 | RHOA/CD4/CD44   | 21 GO |
| GO:0061045 | negative regulation of wound healing                                                        | 13/212 | 73/17913  | 2.85E-12 | 1.63E-10 | 8.42E-11 | APOE/F2/SMAD3   | 13 GO |
| GO:1900182 | positive regulation of protein localization to nucleus                                      | 13/212 | 74/17913  | 3.43E-12 | 1.92E-10 | 9.97E-11 | PARP1/CDH1/F2/  | 13 GO |



|            |                                                                 |        |           |          |          |          |                     |    |    |
|------------|-----------------------------------------------------------------|--------|-----------|----------|----------|----------|---------------------|----|----|
| GO:0048010 | vascular endothelial growth factor receptor signaling pathway   | 14/212 | 93/17913  | 4.48E-12 | 2.48E-10 | 1.29E-10 | RHOA/PTK2B/GRB2     | 14 | GO |
| GO:0050867 | positive regulation of cell activation                          | 23/212 | 319/17913 | 4.55E-12 | 2.49E-10 | 1.29E-10 | RHOA/CD4/FGR/KIT/L  | 23 | GO |
| GO:0048732 | gland development                                               | 26/212 | 422/17913 | 6.07E-12 | 3.27E-10 | 1.70E-10 | ABL1/CCND1/CDK4     | 26 | GO |
| GO:0050731 | positive regulation of peptidyl-tyrosine phosphorylation        | 18/212 | 184/17913 | 6.92E-12 | 3.68E-10 | 1.91E-10 | ABL1/CD4/CD44/ERBB2 | 18 | GO |
| GO:0043550 | regulation of lipid kinase activity                             | 12/212 | 62/17913  | 7.10E-12 | 3.71E-10 | 1.92E-10 | F2/PTK2B/FGR/KIT/L  | 12 | GO |
| GO:0048015 | phosphatidylinositol-mediated signaling                         | 17/212 | 160/17913 | 7.15E-12 | 3.71E-10 | 1.92E-10 | RHOA/CBL/ERBB2      | 17 | GO |
| GO:0014065 | phosphatidylinositol 3-kinase signaling                         | 16/212 | 138/17913 | 7.89E-12 | 4.04E-10 | 2.09E-10 | CBL/ERBB2/F2/FCG    | 16 | GO |
| GO:0001952 | regulation of cell-matrix adhesion                              | 15/212 | 117/17913 | 8.31E-12 | 4.15E-10 | 2.15E-10 | ABL1/RHOA/DUSP3     | 15 | GO |
| GO:0014066 | regulation of phosphatidylinositol 3-kinase signaling           | 15/212 | 117/17913 | 8.31E-12 | 4.15E-10 | 2.15E-10 | CBL/F2/FGR/KIT/L    | 15 | GO |
| GO:0090218 | positive regulation of lipid kinase activity                    | 10/212 | 36/17913  | 8.47E-12 | 4.18E-10 | 2.17E-10 | F2/PTK2B/FGR/KIT/L  | 10 | GO |
| GO:0048017 | inositol lipid-mediated signaling                               | 17/212 | 163/17913 | 9.66E-12 | 4.61E-10 | 2.39E-10 | RHOA/CBL/ERBB2      | 17 | GO |
| GO:0030195 | negative regulation of blood coagulation                        | 11/212 | 49/17913  | 9.67E-12 | 4.61E-10 | 2.39E-10 | APOE/F2/SERPINI     | 11 | GO |
| GO:0060395 | SMAD protein signal transduction                                | 11/212 | 49/17913  | 9.67E-12 | 4.61E-10 | 2.39E-10 | PARP1/DAB2/JUP      | 11 | GO |
| GO:0014068 | positive regulation of phosphatidylinositol 3-kinase signaling  | 13/212 | 81/17913  | 1.14E-11 | 5.39E-10 | 2.79E-10 | CBL/F2/FGR/KIT/L    | 13 | GO |
| GO:1900047 | negative regulation of hemostasis                               | 11/212 | 50/17913  | 1.23E-11 | 5.72E-10 | 2.96E-10 | APOE/F2/SERPINI     | 11 | GO |
| GO:0002696 | positive regulation of leukocyte activation                     | 22/212 | 305/17913 | 1.35E-11 | 6.24E-10 | 3.23E-10 | RHOA/CD4/FGR/KIT/L  | 22 | GO |
| GO:0043542 | endothelial cell migration                                      | 21/212 | 275/17913 | 1.38E-11 | 6.29E-10 | 3.26E-10 | ABL1/APOE/RHOA      | 21 | GO |
| GO:0045834 | positive regulation of lipid metabolic process                  | 16/212 | 144/17913 | 1.52E-11 | 6.86E-10 | 3.55E-10 | APOE/F2/PTK2B/FCG   | 16 | GO |
| GO:0043406 | positive regulation of MAP kinase activity                      | 20/212 | 250/17913 | 1.86E-11 | 8.31E-10 | 4.30E-10 | CRKL/ERBB2/PTK2B    | 20 | GO |
| GO:0050851 | antigen receptor-mediated signaling pathway                     | 19/212 | 224/17913 | 2.20E-11 | 9.70E-10 | 5.03E-10 | ABL1/CD4/CRKL/L     | 19 | GO |
| GO:0050870 | positive regulation of T cell activation                        | 18/212 | 198/17913 | 2.38E-11 | 1.04E-09 | 5.39E-10 | RHOA/CD4/GLI3/SHC   | 18 | GO |
| GO:0050819 | negative regulation of coagulation                              | 11/212 | 53/17913  | 2.43E-11 | 1.05E-09 | 5.43E-10 | APOE/F2/SERPINI     | 11 | GO |
| GO:1903035 | negative regulation of response to wounding                     | 13/212 | 87/17913  | 2.93E-11 | 1.25E-09 | 6.48E-10 | APOE/F2/SMAD3       | 13 | GO |
| GO:0010810 | regulation of cell-substrate adhesion                           | 18/212 | 201/17913 | 3.07E-11 | 1.30E-09 | 6.72E-10 | ABL1/RHOA/CRKL      | 18 | GO |
| GO:0032388 | positive regulation of intracellular transport                  | 18/212 | 203/17913 | 3.62E-11 | 1.51E-09 | 7.84E-10 | ACTN2/CDH1/DA       | 18 | GO |
| GO:0071901 | negative regulation of protein serine/threonine kinase activity | 15/212 | 136/17913 | 7.47E-11 | 3.09E-09 | 1.60E-09 | ABL1/APC/APOE/BCHE  | 15 | GO |
| GO:0007162 | negative regulation of cell adhesion                            | 20/212 | 271/17913 | 8.01E-11 | 3.29E-09 | 1.70E-09 | ABL1/RHOA/CASP      | 20 | GO |
| GO:0043552 | positive regulation of phosphatidylinositol 3-kinase activity   | 9/212  | 32/17913  | 8.51E-11 | 3.46E-09 | 1.79E-09 | PTK2B/FGR/KIT/L     | 9  | GO |
| GO:0038127 | ERBB signaling pathway                                          | 15/212 | 138/17913 | 9.22E-11 | 3.70E-09 | 1.92E-09 | ABL1/CBL/DUSP3      | 15 | GO |
| GO:0046824 | positive regulation of nucleocytoplasmic transport              | 11/212 | 60/17913  | 1.02E-10 | 4.04E-09 | 2.09E-09 | CDH1/GLI3/JUP/S     | 11 | GO |
| GO:0033627 | cell adhesion mediated by integrin                              | 11/212 | 61/17913  | 1.23E-10 | 4.83E-09 | 2.50E-09 | CRKL/EPHA2/ITGI     | 11 | GO |
| GO:0032868 | response to insulin                                             | 19/212 | 252/17913 | 1.69E-10 | 6.59E-09 | 3.42E-09 | PARP1/APC/GRB2      | 19 | GO |
| GO:0042326 | negative regulation of phosphorylation                          | 25/212 | 455/17913 | 1.83E-10 | 7.09E-09 | 3.67E-09 | ABL1/APC/APOE/BCHE  | 25 | GO |
| GO:1903727 | positive regulation of phospholipid metabolic process           | 10/212 | 48/17913  | 1.93E-10 | 7.38E-09 | 3.82E-09 | PTK2B/FGR/KIT/L     | 10 | GO |
| GO:0032869 | cellular response to insulin stimulus                           | 17/212 | 197/17913 | 1.98E-10 | 7.53E-09 | 3.90E-09 | PARP1/APC/GRB2      | 17 | GO |
| GO:0009636 | response to toxic substance                                     | 26/212 | 499/17913 | 2.44E-10 | 9.17E-09 | 4.75E-09 | ABL1/APEX1/APC      | 26 | GO |
| GO:0051251 | positive regulation of lymphocyte activation                    | 19/212 | 258/17913 | 2.52E-10 | 9.40E-09 | 4.87E-09 | RHOA/CD4/GLI3/SHC   | 19 | GO |
| GO:0007265 | Ras protein signal transduction                                 | 21/212 | 324/17913 | 2.94E-10 | 1.09E-08 | 5.63E-09 | ABL1/APOE/RHOA      | 21 | GO |
| GO:0050804 | modulation of chemical synaptic transmission                    | 23/212 | 393/17913 | 3.02E-10 | 1.10E-08 | 5.70E-09 | ABL1/APOE/BCHE      | 23 | GO |
| GO:0090316 | positive regulation of intracellular protein transport          | 15/212 | 150/17913 | 3.03E-10 | 1.10E-08 | 5.70E-09 | CDH1/ERBB2/GLI3     | 15 | GO |
| GO:0030098 | lymphocyte differentiation                                      | 21/212 | 325/17913 | 3.11E-10 | 1.12E-08 | 5.80E-09 | ABL1/RHOA/CD4,SHC   | 21 | GO |
| GO:0099177 | regulation of trans-synaptic signaling                          | 23/212 | 394/17913 | 3.17E-10 | 1.13E-08 | 5.85E-09 | ABL1/APOE/BCHE      | 23 | GO |
| GO:0030100 | regulation of endocytosis                                       | 19/212 | 262/17913 | 3.28E-10 | 1.16E-08 | 6.00E-09 | ABL1/APOE/CBL/ERBB2 | 19 | GO |
| GO:0010632 | regulation of epithelial cell migration                         | 20/212 | 294/17913 | 3.41E-10 | 1.20E-08 | 6.19E-09 | ABL1/APOE/RHOA      | 20 | GO |
| GO:0002576 | platelet degranulation                                          | 14/212 | 128/17913 | 3.65E-10 | 1.27E-08 | 6.57E-09 | SERPINA3/ACTN2      | 14 | GO |
| GO:1903725 | regulation of phospholipid metabolic process                    | 12/212 | 86/17913  | 3.92E-10 | 1.35E-08 | 7.00E-09 | PTK2B/FGR/KIT/L     | 12 | GO |
| GO:1902105 | regulation of leukocyte differentiation                         | 19/212 | 267/17913 | 4.51E-10 | 1.54E-08 | 7.99E-09 | ABL1/RHOA/CD4,SHC   | 19 | GO |
| GO:0019216 | regulation of lipid metabolic process                           | 23/212 | 402/17913 | 4.70E-10 | 1.59E-08 | 8.24E-09 | SERPINA3/APOB/APOE  | 23 | GO |
| GO:0043551 | regulation of phosphatidylinositol 3-kinase activity            | 10/212 | 53/17913  | 5.46E-10 | 1.83E-08 | 9.50E-09 | PTK2B/FGR/KIT/L     | 10 | GO |

|            |                                                                                              |        |           |          |          |          |                 |    |    |
|------------|----------------------------------------------------------------------------------------------|--------|-----------|----------|----------|----------|-----------------|----|----|
| GO:0010001 | glial cell differentiation                                                                   | 17/212 | 212/17913 | 6.22E-10 | 2.07E-08 | 1.07E-08 | ABL1/RHOA/ERBI  | 17 | GO |
| GO:0043254 | regulation of protein complex assembly                                                       | 23/212 | 409/17913 | 6.57E-10 | 2.17E-08 | 1.13E-08 | ABL1/PARP1/APC  | 23 | GO |
| GO:0034333 | adherens junction assembly                                                                   | 12/212 | 90/17913  | 6.74E-10 | 2.21E-08 | 1.14E-08 | ABL1/ACTN2/RHC  | 12 | GO |
| GO:0048008 | platelet-derived growth factor receptor signaling pathway                                    | 10/212 | 55/17913  | 8.02E-10 | 2.61E-08 | 1.35E-08 | ABL1/CBL/LRP1/F | 10 | GO |
| GO:0032102 | negative regulation of response to external stimulus                                         | 21/212 | 343/17913 | 8.30E-10 | 2.66E-08 | 1.38E-08 | APOE/CDH5/DUS   | 21 | GO |
| GO:0009755 | hormone-mediated signaling pathway                                                           | 17/212 | 216/17913 | 8.31E-10 | 2.66E-08 | 1.38E-08 | PARP1/RHOA/DA   | 17 | GO |
| GO:0001933 | negative regulation of protein phosphorylation                                               | 23/212 | 416/17913 | 9.13E-10 | 2.90E-08 | 1.50E-08 | ABL1/APC/APOE/  | 23 | GO |
| GO:0033157 | regulation of intracellular protein transport                                                | 17/212 | 220/17913 | 1.10E-09 | 3.47E-08 | 1.80E-08 | CDH1/ERBB2/GLI  | 17 | GO |
| GO:0007229 | integrin-mediated signaling pathway                                                          | 12/212 | 94/17913  | 1.13E-09 | 3.53E-08 | 1.83E-08 | ABL1/PTK2B/FGR  | 12 | GO |
| GO:1900180 | regulation of protein localization to nucleus                                                | 13/212 | 117/17913 | 1.30E-09 | 4.03E-08 | 2.09E-08 | PARP1/CDH1/F2/  | 13 | GO |
| GO:0042063 | gliogenesis                                                                                  | 19/212 | 285/17913 | 1.35E-09 | 4.16E-08 | 2.16E-08 | ABL1/RHOA/CRKI  | 19 | GO |
| GO:1901342 | regulation of vasculature development                                                        | 23/212 | 425/17913 | 1.38E-09 | 4.22E-08 | 2.19E-08 | ABL1/KLK3/RHOA  | 23 | GO |
| GO:0048511 | rhythmic process                                                                             | 19/212 | 287/17913 | 1.52E-09 | 4.61E-08 | 2.39E-08 | CASP3/DDX5/EP3  | 19 | GO |
| GO:0010543 | regulation of platelet activation                                                            | 8/212  | 30/17913  | 1.58E-09 | 4.76E-08 | 2.47E-08 | APOE/F2/LYN/PD  | 8  | GO |
| GO:0010522 | regulation of calcium ion transport into cytosol                                             | 12/212 | 98/17913  | 1.84E-09 | 5.50E-08 | 2.85E-08 | ABL1/CD4/F2/PTI | 12 | GO |
| GO:0030278 | regulation of ossification                                                                   | 16/212 | 199/17913 | 1.95E-09 | 5.78E-08 | 3.00E-08 | DDX5/PTK2B/GLI  | 16 | GO |
| GO:0035690 | cellular response to drug                                                                    | 21/212 | 362/17913 | 2.19E-09 | 6.45E-08 | 3.34E-08 | ABL1/APEX1/RHC  | 21 | GO |
| GO:0046677 | response to antibiotic                                                                       | 20/212 | 328/17913 | 2.30E-09 | 6.73E-08 | 3.48E-08 | ABL1/APEX1/RHC  | 20 | GO |
| GO:0010594 | regulation of endothelial cell migration                                                     | 17/212 | 231/17913 | 2.32E-09 | 6.73E-08 | 3.48E-08 | ABL1/APOE/RHO   | 17 | GO |
| GO:0046822 | regulation of nucleocytoplasmic transport                                                    | 12/212 | 100/17913 | 2.33E-09 | 6.73E-08 | 3.48E-08 | CDH1/GLI3/JUP/S | 12 | GO |
| GO:0033628 | regulation of cell adhesion mediated by integrin                                             | 9/212  | 45/17913  | 2.35E-09 | 6.75E-08 | 3.50E-08 | CRKL/EPHA2/LYN  | 9  | GO |
| GO:1904018 | positive regulation of vasculature development                                               | 17/212 | 232/17913 | 2.48E-09 | 7.06E-08 | 3.66E-08 | ABL1/RHOB/CDH   | 17 | GO |
| GO:0051098 | regulation of binding                                                                        | 21/212 | 368/17913 | 2.93E-09 | 8.29E-08 | 4.30E-08 | ABL1/PARP1/APC  | 21 | GO |
| GO:0050852 | T cell receptor signaling pathway                                                            | 15/212 | 180/17913 | 3.87E-09 | 1.09E-07 | 5.64E-08 | ABL1/CD4/CRKL/I | 15 | GO |
| GO:0030099 | myeloid cell differentiation                                                                 | 22/212 | 411/17913 | 3.93E-09 | 1.10E-07 | 5.68E-08 | PARP1/CASP3/CC  | 22 | GO |
| GO:0008286 | insulin receptor signaling pathway                                                           | 13/212 | 128/17913 | 3.96E-09 | 1.10E-07 | 5.68E-08 | APC/GRB10/PAK1  | 13 | GO |
| GO:0007183 | SMAD protein complex assembly                                                                | 6/212  | 13/17913  | 4.10E-09 | 1.13E-07 | 5.85E-08 | PARP1/SMAD1/SI  | 6  | GO |
| GO:0043401 | steroid hormone mediated signaling pathway                                                   | 15/212 | 181/17913 | 4.18E-09 | 1.14E-07 | 5.90E-08 | PARP1/RHOA/DA   | 15 | GO |
| GO:0051348 | negative regulation of transferase activity                                                  | 18/212 | 272/17913 | 4.19E-09 | 1.14E-07 | 5.90E-08 | ABL1/APC/APOE/  | 18 | GO |
| GO:0031532 | actin cytoskeleton reorganization                                                            | 11/212 | 85/17913  | 4.88E-09 | 1.32E-07 | 6.82E-08 | ABL1/RHOA/PTK2  | 11 | GO |
| GO:0051924 | regulation of calcium ion transport                                                          | 17/212 | 244/17913 | 5.32E-09 | 1.43E-07 | 7.39E-08 | ABL1/RHOA/CASI  | 17 | GO |
| GO:0045765 | regulation of angiogenesis                                                                   | 21/212 | 383/17913 | 5.95E-09 | 1.58E-07 | 8.20E-08 | ABL1/KLK3/RHOA  | 21 | GO |
| GO:2000146 | negative regulation of cell motility                                                         | 20/212 | 347/17913 | 6.01E-09 | 1.59E-07 | 8.24E-08 | APEX1/APOE/RHC  | 20 | GO |
| GO:0035821 | modification of morphology or physiology of other organism                                   | 14/212 | 160/17913 | 6.93E-09 | 1.82E-07 | 9.44E-08 | APOE/CD4/EP30C  | 14 | GO |
| GO:0050673 | epithelial cell proliferation                                                                | 22/212 | 425/17913 | 7.25E-09 | 1.89E-07 | 9.81E-08 | APOE/CCND1/EPI  | 22 | GO |
| GO:0048608 | reproductive structure development                                                           | 22/212 | 426/17913 | 7.57E-09 | 1.96E-07 | 1.02E-07 | CCND1/CASP3/CE  | 22 | GO |
| GO:0070482 | response to oxygen levels                                                                    | 21/212 | 389/17913 | 7.82E-09 | 2.02E-07 | 1.04E-07 | RHOA/CASP3/CA   | 21 | GO |
| GO:0007568 | aging                                                                                        | 19/212 | 318/17913 | 8.20E-09 | 2.10E-07 | 1.09E-07 | ABL1/APEX1/INPI | 19 | GO |
| GO:0061458 | reproductive system development                                                              | 22/212 | 429/17913 | 8.60E-09 | 2.18E-07 | 1.13E-07 | CCND1/CASP3/CE  | 22 | GO |
| GO:0018209 | peptidyl-serine modification                                                                 | 17/212 | 252/17913 | 8.63E-09 | 2.18E-07 | 1.13E-07 | PARP1/ARAF/CD4  | 17 | GO |
| GO:0031032 | actomyosin structure organization                                                            | 14/212 | 163/17913 | 8.81E-09 | 2.22E-07 | 1.15E-07 | ABL1/ACTN2/RHC  | 14 | GO |
| GO:1901888 | regulation of cell junction assembly                                                         | 11/212 | 90/17913  | 9.04E-09 | 2.26E-07 | 1.17E-07 | ABL1/RHOA/DUS   | 11 | GO |
| GO:0060326 | cell chemotaxis                                                                              | 17/212 | 253/17913 | 9.16E-09 | 2.28E-07 | 1.18E-07 | CRKL/EPHA2/PTK  | 17 | GO |
| GO:0051817 | modification of morphology or physiology of other organism involved in symbiotic interaction | 12/212 | 113/17913 | 9.58E-09 | 2.37E-07 | 1.23E-07 | APOE/CD4/EP30C  | 12 | GO |
| GO:0042307 | positive regulation of protein import into nucleus                                           | 8/212  | 37/17913  | 9.70E-09 | 2.38E-07 | 1.23E-07 | CDH1/GLI3/JUP/S | 8  | GO |
| GO:0034504 | protein localization to nucleus                                                              | 16/212 | 223/17913 | 1.00E-08 | 2.45E-07 | 1.27E-07 | PARP1/CDH1/F2/  | 16 | GO |
| GO:0051493 | regulation of cytoskeleton organization                                                      | 23/212 | 472/17913 | 1.01E-08 | 2.45E-07 | 1.27E-07 | ABL1/ACTN2/APC  | 23 | GO |
| GO:0042730 | fibrinolysis                                                                                 | 7/212  | 25/17913  | 1.18E-08 | 2.85E-07 | 1.48E-07 | F2/SERPINE1/PLA | 7  | GO |
| GO:0045088 | regulation of innate immune response                                                         | 22/212 | 440/17913 | 1.36E-08 | 3.26E-07 | 1.69E-07 | APOB/APOE/EP3C  | 22 | GO |

|            |                                                                                        |        |           |          |          |          |                 |    |    |
|------------|----------------------------------------------------------------------------------------|--------|-----------|----------|----------|----------|-----------------|----|----|
| GO:0038095 | Fc-epsilon receptor signaling pathway                                                  | 14/212 | 169/17913 | 1.40E-08 | 3.34E-07 | 1.73E-07 | JUN/LYN/PAK1/P  | 14 | GO |
| GO:0051271 | negative regulation of cellular component movement                                     | 20/212 | 365/17913 | 1.41E-08 | 3.34E-07 | 1.73E-07 | APEX1/APOE/RHO  | 20 | GO |
| GO:0060191 | regulation of lipase activity                                                          | 11/212 | 94/17913  | 1.44E-08 | 3.39E-07 | 1.76E-07 | ABL1/RHOA/RHO   | 11 | GO |
| GO:1904591 | positive regulation of protein import                                                  | 8/212  | 39/17913  | 1.51E-08 | 3.55E-07 | 1.84E-07 | CDH1/GLI3/JUP/S | 8  | GO |
| GO:0000302 | response to reactive oxygen species                                                    | 16/212 | 230/17913 | 1.56E-08 | 3.63E-07 | 1.88E-07 | ABL1/APEX1/APC  | 16 | GO |
| GO:0007050 | cell cycle arrest                                                                      | 16/212 | 231/17913 | 1.66E-08 | 3.81E-07 | 1.98E-07 | ABL1/APC/CCND1  | 16 | GO |
| GO:0018105 | peptidyl-serine phosphorylation                                                        | 16/212 | 231/17913 | 1.66E-08 | 3.81E-07 | 1.98E-07 | ARAF/CD44/SMA   | 16 | GO |
| GO:0045766 | positive regulation of angiogenesis                                                    | 15/212 | 203/17913 | 1.99E-08 | 4.55E-07 | 2.36E-07 | ABL1/RHOB/CDH   | 15 | GO |
| GO:0006874 | cellular calcium ion homeostasis                                                       | 20/212 | 375/17913 | 2.22E-08 | 5.02E-07 | 2.60E-07 | ABL1/APOE/CASF  | 20 | GO |
| GO:0048545 | response to steroid hormone                                                            | 20/212 | 375/17913 | 2.22E-08 | 5.02E-07 | 2.60E-07 | PARP1/RHOA/BCI  | 20 | GO |
| GO:0034109 | homotypic cell-cell adhesion                                                           | 10/212 | 77/17913  | 2.40E-08 | 5.40E-07 | 2.80E-07 | ITGB3/JUP/LYN/P | 10 | GO |
| GO:0040013 | negative regulation of locomotion                                                      | 20/212 | 377/17913 | 2.42E-08 | 5.42E-07 | 2.81E-07 | APEX1/APOE/RHO  | 20 | GO |
| GO:0046626 | regulation of insulin receptor signaling pathway                                       | 9/212  | 58/17913  | 2.48E-08 | 5.49E-07 | 2.84E-07 | GRB10/PAK1/PIK: | 9  | GO |
| GO:0070527 | platelet aggregation                                                                   | 9/212  | 58/17913  | 2.48E-08 | 5.49E-07 | 2.84E-07 | ITGB3/LYN/PDGF  | 9  | GO |
| GO:0002446 | neutrophil mediated immunity                                                           | 23/212 | 499/17913 | 2.83E-08 | 6.23E-07 | 3.23E-07 | SERPINA3/RHOA/  | 23 | GO |
| GO:0048872 | homeostasis of number of cells                                                         | 16/212 | 241/17913 | 3.01E-08 | 6.59E-07 | 3.42E-07 | ABL1/CASP3/INPI | 16 | GO |
| GO:0090287 | regulation of cellular response to growth factor stimulus                              | 17/212 | 276/17913 | 3.32E-08 | 7.24E-07 | 3.75E-07 | ABL1/DAB2/EP30  | 17 | GO |
| GO:0070997 | neuron death                                                                           | 19/212 | 347/17913 | 3.34E-08 | 7.24E-07 | 3.75E-07 | ABL1/PARP1/APC  | 19 | GO |
| GO:1905475 | regulation of protein localization to membrane                                         | 14/212 | 181/17913 | 3.36E-08 | 7.25E-07 | 3.76E-07 | CRKL/DAB2/EPHA  | 14 | GO |
| GO:0031098 | stress-activated protein kinase signaling cascade                                      | 17/212 | 278/17913 | 3.69E-08 | 7.91E-07 | 4.10E-07 | RHOA/CASR/CRKI  | 17 | GO |
| GO:1902903 | regulation of supramolecular fiber organization                                        | 18/212 | 313/17913 | 3.70E-08 | 7.91E-07 | 4.10E-07 | ABL1/ACTN2/APC  | 18 | GO |
| GO:0042742 | defense response to bacterium                                                          | 16/212 | 245/17913 | 3.79E-08 | 8.01E-07 | 4.15E-07 | KLK3/CD4/EPHA2  | 16 | GO |
| GO:0006606 | protein import into nucleus                                                            | 11/212 | 103/17913 | 3.79E-08 | 8.01E-07 | 4.15E-07 | CDH1/GLI3/JUP/k | 11 | GO |
| GO:0001503 | ossification                                                                           | 20/212 | 388/17913 | 3.90E-08 | 8.12E-07 | 4.21E-07 | RHOA/CASR/DDX   | 20 | GO |
| GO:0055074 | calcium ion homeostasis                                                                | 20/212 | 388/17913 | 3.90E-08 | 8.12E-07 | 4.21E-07 | ABL1/APOE/CASF  | 20 | GO |
| GO:0006875 | cellular metal ion homeostasis                                                         | 22/212 | 467/17913 | 3.93E-08 | 8.12E-07 | 4.21E-07 | ABL1/APOE/CASF  | 22 | GO |
| GO:0007045 | cell-substrate adherens junction assembly                                              | 10/212 | 81/17913  | 3.94E-08 | 8.12E-07 | 4.21E-07 | ABL1/ACTN2/RHO  | 10 | GO |
| GO:0048041 | focal adhesion assembly                                                                | 10/212 | 81/17913  | 3.94E-08 | 8.12E-07 | 4.21E-07 | ABL1/ACTN2/RHO  | 10 | GO |
| GO:0007611 | learning or memory                                                                     | 16/212 | 247/17913 | 4.24E-08 | 8.70E-07 | 4.51E-07 | APOE/BCHE/CASF  | 16 | GO |
| GO:0090092 | regulation of transmembrane receptor protein serine/threonine kinase signaling pathway | 15/212 | 215/17913 | 4.28E-08 | 8.73E-07 | 4.52E-07 | ABL1/PARP1/DAE  | 15 | GO |
| GO:0072503 | cellular divalent inorganic cation homeostasis                                         | 20/212 | 392/17913 | 4.61E-08 | 9.36E-07 | 4.85E-07 | ABL1/APOE/CASF  | 20 | GO |
| GO:0050866 | negative regulation of cell activation                                                 | 14/212 | 187/17913 | 5.07E-08 | 1.02E-06 | 5.30E-07 | APOE/CASP3/DUI  | 14 | GO |
| GO:0051235 | maintenance of location                                                                | 17/212 | 286/17913 | 5.58E-08 | 1.12E-06 | 5.81E-07 | ABL1/APOB/APOI  | 17 | GO |
| GO:0061614 | pri-miRNA transcription by RNA polymerase II                                           | 8/212  | 46/17913  | 5.98E-08 | 1.20E-06 | 6.20E-07 | DDX5/JUN/SMAD   | 8  | GO |
| GO:0006469 | negative regulation of protein kinase activity                                         | 15/212 | 222/17913 | 6.54E-08 | 1.30E-06 | 6.74E-07 | ABL1/APC/APOE/  | 15 | GO |
| GO:0030509 | BMP signaling pathway                                                                  | 12/212 | 134/17913 | 6.57E-08 | 1.30E-06 | 6.74E-07 | ABL1/DDX5/SMA   | 12 | GO |
| GO:0006644 | phospholipid metabolic process                                                         | 20/212 | 402/17913 | 6.97E-08 | 1.37E-06 | 7.12E-07 | PTK2B/FGR/INPP! | 20 | GO |
| GO:0048013 | ephrin receptor signaling pathway                                                      | 10/212 | 86/17913  | 7.05E-08 | 1.38E-06 | 7.14E-07 | RHOA/EPHA2/LYI  | 10 | GO |
| GO:0006979 | response to oxidative stress                                                           | 21/212 | 442/17913 | 7.06E-08 | 1.38E-06 | 7.14E-07 | ABL1/PARP1/APE  | 21 | GO |
| GO:0070849 | response to epidermal growth factor                                                    | 8/212  | 47/17913  | 7.13E-08 | 1.39E-06 | 7.18E-07 | CBL/DUSP3/ERBB  | 8  | GO |
| GO:0036293 | response to decreased oxygen levels                                                    | 19/212 | 365/17913 | 7.43E-08 | 1.44E-06 | 7.44E-07 | RHOA/CASP3/CA!  | 19 | GO |
| GO:0038128 | ERBB2 signaling pathway                                                                | 7/212  | 32/17913  | 7.71E-08 | 1.48E-06 | 7.69E-07 | ERBB2/GRB7/PIK: | 7  | GO |
| GO:1900076 | regulation of cellular response to insulin stimulus                                    | 9/212  | 66/17913  | 7.93E-08 | 1.52E-06 | 7.88E-07 | GRB10/PAK1/PIK: | 9  | GO |
| GO:0030336 | negative regulation of cell migration                                                  | 18/212 | 332/17913 | 9.04E-08 | 1.72E-06 | 8.93E-07 | APEX1/APOE/RHO  | 18 | GO |
| GO:0032956 | regulation of actin cytoskeleton organization                                          | 17/212 | 297/17913 | 9.62E-08 | 1.83E-06 | 9.46E-07 | ABL1/ACTN2/RHO  | 17 | GO |
| GO:0072507 | divalent inorganic cation homeostasis                                                  | 20/212 | 412/17913 | 1.04E-07 | 1.96E-06 | 1.02E-06 | ABL1/APOE/CASF  | 20 | GO |
| GO:0017038 | protein import                                                                         | 12/212 | 140/17913 | 1.07E-07 | 2.01E-06 | 1.04E-06 | APOE/CDH1/GLI3  | 12 | GO |
| GO:0022408 | negative regulation of cell-cell adhesion                                              | 13/212 | 169/17913 | 1.12E-07 | 2.10E-06 | 1.09E-06 | ABL1/CASP3/CDH  | 13 | GO |
| GO:0050708 | regulation of protein secretion                                                        | 21/212 | 456/17913 | 1.19E-07 | 2.21E-06 | 1.14E-06 | ABL1/APOE/CASF  | 21 | GO |

|            |                                                                                                                         |        |           |          |          |          |                        |       |
|------------|-------------------------------------------------------------------------------------------------------------------------|--------|-----------|----------|----------|----------|------------------------|-------|
| GO:0007173 | epidermal growth factor receptor signaling pathway                                                                      | 11/212 | 115/17913 | 1.19E-07 | 2.21E-06 | 1.14E-06 | ABL1/CBL/DUSP3         | 11 GO |
| GO:0017015 | regulation of transforming growth factor beta receptor signaling pathway                                                | 11/212 | 115/17913 | 1.19E-07 | 2.21E-06 | 1.14E-06 | DAB2/EP300/SMAD1/SMAD5 | 11 GO |
| GO:0009991 | response to extracellular stimulus                                                                                      | 22/212 | 498/17913 | 1.21E-07 | 2.22E-06 | 1.15E-06 | APOE/BCHE/CCNI         | 22 GO |
| GO:0030217 | T cell differentiation                                                                                                  | 15/212 | 234/17913 | 1.30E-07 | 2.39E-06 | 1.24E-06 | ABL1/RHOA/CD4          | 15 GO |
| GO:0043491 | protein kinase B signaling                                                                                              | 16/212 | 268/17913 | 1.31E-07 | 2.39E-06 | 1.24E-06 | EPHA2/ERBB2/KIT        | 16 GO |
| GO:0060193 | positive regulation of lipase activity                                                                                  | 9/212  | 70/17913  | 1.34E-07 | 2.43E-06 | 1.26E-06 | RHOA/RHOC/KIT          | 9 GO  |
| GO:0032970 | regulation of actin filament-based process                                                                              | 18/212 | 341/17913 | 1.35E-07 | 2.44E-06 | 1.26E-06 | ABL1/ACTN2/RHOA        | 18 GO |
| GO:1903844 | regulation of cellular response to transforming growth factor beta stimulus                                             | 11/212 | 117/17913 | 1.43E-07 | 2.57E-06 | 1.33E-06 | DAB2/EP300/SMAD1/SMAD5 | 11 GO |
| GO:0010634 | positive regulation of epithelial cell migration                                                                        | 13/212 | 173/17913 | 1.48E-07 | 2.63E-06 | 1.36E-06 | ABL1/RHOB/PTK2         | 13 GO |
| GO:0051897 | positive regulation of protein kinase B signaling                                                                       | 13/212 | 173/17913 | 1.48E-07 | 2.63E-06 | 1.36E-06 | ERBB2/KIT/MST1         | 13 GO |
| GO:0060402 | calcium ion transport into cytosol                                                                                      | 12/212 | 145/17913 | 1.57E-07 | 2.79E-06 | 1.45E-06 | ABL1/CD4/F2/PTK2       | 12 GO |
| GO:0030522 | intracellular receptor signaling pathway                                                                                | 16/212 | 272/17913 | 1.60E-07 | 2.83E-06 | 1.47E-06 | PARP1/RHOA/CASP3       | 16 GO |
| GO:1901522 | positive regulation of transcription from RNA polymerase II promoter involved in cellular response to chemical stimulus | 6/212  | 22/17913  | 1.63E-07 | 2.87E-06 | 1.49E-06 | EP300/SMAD1/SMAD5      | 6 GO  |
| GO:0031667 | response to nutrient levels                                                                                             | 21/212 | 466/17913 | 1.71E-07 | 3.00E-06 | 1.56E-06 | APOE/BCHE/CCNI         | 21 GO |
| GO:0000187 | activation of MAPK activity                                                                                             | 12/212 | 147/17913 | 1.83E-07 | 3.16E-06 | 1.64E-06 | CRKL/KIT/PIK3R1        | 12 GO |
| GO:0071772 | response to BMP                                                                                                         | 12/212 | 147/17913 | 1.83E-07 | 3.16E-06 | 1.64E-06 | ABL1/DDX5/SMA          | 12 GO |
| GO:0071773 | cellular response to BMP stimulus                                                                                       | 12/212 | 147/17913 | 1.83E-07 | 3.16E-06 | 1.64E-06 | ABL1/DDX5/SMA          | 12 GO |
| GO:0050853 | B cell receptor signaling pathway                                                                                       | 8/212  | 53/17913  | 1.89E-07 | 3.26E-06 | 1.69E-06 | ABL1/LYN/PRKCB         | 8 GO  |
| GO:0051896 | regulation of protein kinase B signaling                                                                                | 15/212 | 241/17913 | 1.91E-07 | 3.28E-06 | 1.70E-06 | EPHA2/ERBB2/KIT        | 15 GO |
| GO:0007044 | cell-substrate junction assembly                                                                                        | 10/212 | 96/17913  | 2.03E-07 | 3.46E-06 | 1.79E-06 | ABL1/ACTN2/RHOA        | 10 GO |
| GO:0097193 | intrinsic apoptotic signaling pathway                                                                                   | 16/212 | 277/17913 | 2.05E-07 | 3.49E-06 | 1.81E-06 | ABL1/PARP1/CASP3       | 16 GO |
| GO:0071383 | cellular response to steroid hormone stimulus                                                                           | 15/212 | 243/17913 | 2.13E-07 | 3.61E-06 | 1.87E-06 | PARP1/RHOA/DA          | 15 GO |
| GO:0033673 | negative regulation of kinase activity                                                                                  | 15/212 | 244/17913 | 2.24E-07 | 3.78E-06 | 1.96E-06 | ABL1/APC/APOE/         | 15 GO |
| GO:0009896 | positive regulation of catabolic process                                                                                | 19/212 | 392/17913 | 2.25E-07 | 3.78E-06 | 1.96E-06 | APC/APOE/DAB2,         | 19 GO |
| GO:0051701 | interaction with host                                                                                                   | 14/212 | 211/17913 | 2.27E-07 | 3.80E-06 | 1.97E-06 | CBL/CD4/CDH1/C         | 14 GO |
| GO:0001666 | response to hypoxia                                                                                                     | 18/212 | 354/17913 | 2.35E-07 | 3.92E-06 | 2.03E-06 | RHOA/CASP3/CAS         | 18 GO |
| GO:0001657 | ureteric bud development                                                                                                | 10/212 | 98/17913  | 2.47E-07 | 4.09E-06 | 2.12E-06 | GLI3/SMAD1/SMAD5       | 10 GO |
| GO:0031295 | T cell costimulation                                                                                                    | 8/212  | 55/17913  | 2.55E-07 | 4.19E-06 | 2.17E-06 | LYN/PAK1/PIK3R1        | 8 GO  |
| GO:0042306 | regulation of protein import into nucleus                                                                               | 8/212  | 55/17913  | 2.55E-07 | 4.19E-06 | 2.17E-06 | CDH1/GLI3/JUP/S        | 8 GO  |
| GO:0072163 | mesonephric epithelium development                                                                                      | 10/212 | 99/17913  | 2.72E-07 | 4.43E-06 | 2.29E-06 | GLI3/SMAD1/SMAD5       | 10 GO |
| GO:0072164 | mesonephric tubule development                                                                                          | 10/212 | 99/17913  | 2.72E-07 | 4.43E-06 | 2.29E-06 | GLI3/SMAD1/SMAD5       | 10 GO |
| GO:0045022 | early endosome to late endosome transport                                                                               | 7/212  | 38/17913  | 2.72E-07 | 4.43E-06 | 2.29E-06 | DAB2/MAPK1/MAPK3       | 7 GO  |
| GO:0048844 | artery morphogenesis                                                                                                    | 9/212  | 76/17913  | 2.76E-07 | 4.47E-06 | 2.31E-06 | APOB/APOE/LDLR         | 9 GO  |
| GO:0051170 | import into nucleus                                                                                                     | 11/212 | 125/17913 | 2.81E-07 | 4.53E-06 | 2.35E-06 | CDH1/GLI3/JUP/K        | 11 GO |
| GO:0042113 | B cell activation                                                                                                       | 14/212 | 215/17913 | 2.86E-07 | 4.59E-06 | 2.38E-06 | ABL1/CASP3/EP300       | 14 GO |
| GO:0031294 | lymphocyte costimulation                                                                                                | 8/212  | 56/17913  | 2.94E-07 | 4.71E-06 | 2.44E-06 | LYN/PAK1/PIK3R1        | 8 GO  |
| GO:0060840 | artery development                                                                                                      | 10/212 | 100/17913 | 2.99E-07 | 4.76E-06 | 2.47E-06 | APOB/APOE/GLI3         | 10 GO |
| GO:0030010 | establishment of cell polarity                                                                                          | 11/212 | 126/17913 | 3.04E-07 | 4.82E-06 | 2.50E-06 | RHOA/CDH5/CRK          | 11 GO |
| GO:0051668 | localization within membrane                                                                                            | 11/212 | 126/17913 | 3.04E-07 | 4.82E-06 | 2.50E-06 | APOE/CRKL/DLG4         | 11 GO |
| GO:0048708 | astrocyte differentiation                                                                                               | 9/212  | 77/17913  | 3.09E-07 | 4.87E-06 | 2.52E-06 | ABL1/F2/IL6ST/LI       | 9 GO  |
| GO:0002791 | regulation of peptide secretion                                                                                         | 21/212 | 483/17913 | 3.10E-07 | 4.87E-06 | 2.52E-06 | ABL1/APOE/CASP3        | 21 GO |
| GO:0050890 | cognition                                                                                                               | 16/212 | 286/17913 | 3.16E-07 | 4.95E-06 | 2.57E-06 | APOE/BCHE/CASP3        | 16 GO |
| GO:0043393 | regulation of protein binding                                                                                           | 14/212 | 217/17913 | 3.20E-07 | 4.99E-06 | 2.58E-06 | ABL1/APOE/DAB2         | 14 GO |
| GO:0043312 | neutrophil degranulation                                                                                                | 21/212 | 485/17913 | 3.32E-07 | 5.15E-06 | 2.67E-06 | SERPINA3/RHOA/         | 21 GO |
| GO:0051279 | regulation of release of sequestered calcium ion into cytosol                                                           | 9/212  | 78/17913  | 3.46E-07 | 5.35E-06 | 2.77E-06 | ABL1/F2/PTK2B/L        | 9 GO  |
| GO:0045667 | regulation of osteoblast differentiation                                                                                | 11/212 | 128/17913 | 3.57E-07 | 5.51E-06 | 2.85E-06 | DDX5/GLI3/IL6ST,       | 11 GO |
| GO:0051480 | regulation of cytosolic calcium ion concentration                                                                       | 16/212 | 289/17913 | 3.64E-07 | 5.59E-06 | 2.90E-06 | ABL1/CD4/DLG4/         | 16 GO |
| GO:0002283 | neutrophil activation involved in immune response                                                                       | 21/212 | 488/17913 | 3.67E-07 | 5.61E-06 | 2.91E-06 | SERPINA3/RHOA/         | 21 GO |
| GO:0010959 | regulation of metal ion transport                                                                                       | 18/212 | 365/17913 | 3.69E-07 | 5.62E-06 | 2.91E-06 | ABL1/ACTN2/RHOA        | 18 GO |

|            |                                                                 |        |           |          |          |          |                  |    |    |
|------------|-----------------------------------------------------------------|--------|-----------|----------|----------|----------|------------------|----|----|
| GO:0060401 | cytosolic calcium ion transport                                 | 12/212 | 157/17913 | 3.74E-07 | 5.68E-06 | 2.94E-06 | ABL1/CD4/F2/PTI  | 12 | GO |
| GO:0030518 | intracellular steroid hormone receptor signaling pathway        | 11/212 | 129/17913 | 3.87E-07 | 5.84E-06 | 3.03E-06 | PARP1/RHOA/DA    | 11 | GO |
| GO:0030521 | androgen receptor signaling pathway                             | 8/212  | 58/17913  | 3.89E-07 | 5.84E-06 | 3.03E-06 | RHOA/DAB2/DDX    | 8  | GO |
| GO:1904589 | regulation of protein import                                    | 8/212  | 58/17913  | 3.89E-07 | 5.84E-06 | 3.03E-06 | CDH1/GLI3/JUP/S  | 8  | GO |
| GO:0001823 | mesonephros development                                         | 10/212 | 103/17913 | 3.95E-07 | 5.90E-06 | 3.05E-06 | GLI3/SMAD1/SMI   | 10 | GO |
| GO:0007204 | positive regulation of cytosolic calcium ion concentration      | 15/212 | 255/17913 | 3.95E-07 | 5.90E-06 | 3.05E-06 | ABL1/CD4/DLG4/   | 15 | GO |
| GO:0035791 | platelet-derived growth factor receptor-beta signaling pathway  | 5/212  | 14/17913  | 4.07E-07 | 6.04E-06 | 3.13E-06 | ABL1/LRP1/PDGF   | 5  | GO |
| GO:0051054 | positive regulation of DNA metabolic process                    | 14/212 | 222/17913 | 4.22E-07 | 6.22E-06 | 3.22E-06 | PARP1/PTK2B/JU   | 14 | GO |
| GO:0070302 | regulation of stress-activated protein kinase signaling cascade | 14/212 | 222/17913 | 4.22E-07 | 6.22E-06 | 3.22E-06 | DUSP3/PTK2B/LY   | 14 | GO |
| GO:0001101 | response to acid chemical                                       | 17/212 | 330/17913 | 4.29E-07 | 6.31E-06 | 3.27E-06 | APOB/RHOA/BCF    | 17 | GO |
| GO:0006869 | lipid transport                                                 | 17/212 | 332/17913 | 4.67E-07 | 6.84E-06 | 3.54E-06 | APOB/APOE/ITGE   | 17 | GO |
| GO:0009743 | response to carbohydrate                                        | 14/212 | 224/17913 | 4.70E-07 | 6.84E-06 | 3.54E-06 | APOB/RHOA/CAS    | 14 | GO |
| GO:0098927 | vesicle-mediated transport between endosomal compartments       | 7/212  | 41/17913  | 4.71E-07 | 6.84E-06 | 3.54E-06 | DAB2/MAPK1/MI    | 7  | GO |
| GO:0042119 | neutrophil activation                                           | 21/212 | 499/17913 | 5.28E-07 | 7.65E-06 | 3.96E-06 | SERPINA3/RHOA/   | 21 | GO |
| GO:0010038 | response to metal ion                                           | 17/212 | 335/17913 | 5.30E-07 | 7.65E-06 | 3.96E-06 | PARP1/CCND1/C    | 17 | GO |
| GO:2000377 | regulation of reactive oxygen species metabolic process         | 13/212 | 194/17913 | 5.54E-07 | 7.97E-06 | 4.13E-06 | RHOA/F2/PTK2B/   | 13 | GO |
| GO:0051893 | regulation of focal adhesion assembly                           | 8/212  | 61/17913  | 5.80E-07 | 8.28E-06 | 4.29E-06 | ABL1/RHOA/DUS    | 8  | GO |
| GO:0090109 | regulation of cell-substrate junction assembly                  | 8/212  | 61/17913  | 5.80E-07 | 8.28E-06 | 4.29E-06 | ABL1/RHOA/DUS    | 8  | GO |
| GO:0045619 | regulation of lymphocyte differentiation                        | 12/212 | 164/17913 | 5.99E-07 | 8.52E-06 | 4.41E-06 | ABL1/RHOA/ERB    | 12 | GO |
| GO:0034349 | glial cell apoptotic process                                    | 5/212  | 15/17913  | 6.04E-07 | 8.54E-06 | 4.42E-06 | CASP3/PRKCA/PR   | 5  | GO |
| GO:0072075 | metanephric mesenchyme development                              | 5/212  | 15/17913  | 6.04E-07 | 8.54E-06 | 4.42E-06 | SMAD4/MYC/PA     | 5  | GO |
| GO:0034614 | cellular response to reactive oxygen species                    | 12/212 | 165/17913 | 6.39E-07 | 9.00E-06 | 4.66E-06 | ABL1/APEX1/RHC   | 12 | GO |
| GO:0006913 | nucleocytoplasmic transport                                     | 16/212 | 302/17913 | 6.55E-07 | 9.20E-06 | 4.77E-06 | CDH1/GLI3/JUP/k  | 16 | GO |
| GO:0031331 | positive regulation of cellular catabolic process               | 17/212 | 341/17913 | 6.78E-07 | 9.49E-06 | 4.92E-06 | APOE/DAB2/PTK    | 17 | GO |
| GO:0097305 | response to alcohol                                             | 14/212 | 232/17913 | 7.18E-07 | 1.00E-05 | 5.19E-06 | PARP1/RHOA/CC    | 14 | GO |
| GO:0051169 | nuclear transport                                               | 16/212 | 305/17913 | 7.47E-07 | 1.04E-05 | 5.38E-06 | CDH1/GLI3/JUP/k  | 16 | GO |
| GO:0070661 | leukocyte proliferation                                         | 15/212 | 270/17913 | 8.17E-07 | 1.13E-05 | 5.86E-06 | ABL1/CASP3/CD4   | 15 | GO |
| GO:0002573 | myeloid leukocyte differentiation                               | 13/212 | 201/17913 | 8.29E-07 | 1.14E-05 | 5.93E-06 | PARP1/CD4/EPH    | 13 | GO |
| GO:0051403 | stress-activated MAPK cascade                                   | 15/212 | 271/17913 | 8.56E-07 | 1.18E-05 | 6.10E-06 | CASR/CRKL/DUSP   | 15 | GO |
| GO:0043062 | extracellular structure organization                            | 18/212 | 387/17913 | 8.63E-07 | 1.18E-05 | 6.13E-06 | ABL1/APOB/APO    | 18 | GO |
| GO:0097529 | myeloid leukocyte migration                                     | 12/212 | 170/17913 | 8.79E-07 | 1.19E-05 | 6.17E-06 | PTK2B/ITGB2/KIT  | 12 | GO |
| GO:0007259 | JAK-STAT cascade                                                | 11/212 | 140/17913 | 8.79E-07 | 1.19E-05 | 6.17E-06 | F2/IFNAR1/IL6ST, | 11 | GO |
| GO:0034250 | positive regulation of cellular amide metabolic process         | 11/212 | 140/17913 | 8.79E-07 | 1.19E-05 | 6.17E-06 | RHOA/CASP3/ERI   | 11 | GO |
| GO:0072073 | kidney epithelium development                                   | 11/212 | 140/17913 | 8.79E-07 | 1.19E-05 | 6.17E-06 | GLI3/SMAD1/SMI   | 11 | GO |
| GO:0030183 | B cell differentiation                                          | 10/212 | 113/17913 | 9.37E-07 | 1.26E-05 | 6.55E-06 | ABL1/EP300/PTK   | 10 | GO |
| GO:0060537 | muscle tissue development                                       | 18/212 | 392/17913 | 1.04E-06 | 1.39E-05 | 7.23E-06 | ACTN2/RHOA/DD    | 18 | GO |
| GO:0060562 | epithelial tube morphogenesis                                   | 16/212 | 313/17913 | 1.05E-06 | 1.40E-05 | 7.27E-06 | ABL1/RHOA/RHO    | 16 | GO |
| GO:1901214 | regulation of neuron death                                      | 16/212 | 313/17913 | 1.05E-06 | 1.40E-05 | 7.27E-06 | ABL1/PARP1/APC   | 16 | GO |
| GO:0060324 | face development                                                | 7/212  | 46/17913  | 1.07E-06 | 1.42E-05 | 7.35E-06 | EP300/PDGFR/     | 7  | GO |
| GO:0010517 | regulation of phospholipase activity                            | 8/212  | 66/17913  | 1.07E-06 | 1.43E-05 | 7.39E-06 | ABL1/KIT/LRP1/P  | 8  | GO |
| GO:1902107 | positive regulation of leukocyte differentiation                | 11/212 | 143/17913 | 1.09E-06 | 1.44E-05 | 7.44E-06 | RHOA/CD4/GLI3/   | 11 | GO |
| GO:0032103 | positive regulation of response to external stimulus            | 16/212 | 315/17913 | 1.14E-06 | 1.50E-05 | 7.78E-06 | CASR/F2/PTK2B/I  | 16 | GO |
| GO:0032535 | regulation of cellular component size                           | 16/212 | 315/17913 | 1.14E-06 | 1.50E-05 | 7.78E-06 | ABL1/ACTN2/APC   | 16 | GO |
| GO:0042542 | response to hydrogen peroxide                                   | 11/212 | 144/17913 | 1.16E-06 | 1.52E-05 | 7.87E-06 | ABL1/APEX1/RHC   | 11 | GO |
| GO:1903169 | regulation of calcium ion transmembrane transport               | 11/212 | 144/17913 | 1.16E-06 | 1.52E-05 | 7.87E-06 | ABL1/F2/PTK2B/L  | 11 | GO |
| GO:1903391 | regulation of adherens junction organization                    | 8/212  | 67/17913  | 1.21E-06 | 1.57E-05 | 8.15E-06 | ABL1/RHOA/DUS    | 8  | GO |
| GO:2000641 | regulation of early endosome to late endosome transport         | 5/212  | 17/17913  | 1.22E-06 | 1.58E-05 | 8.21E-06 | DAB2/MAPK1/MI    | 5  | GO |
| GO:0052547 | regulation of peptidase activity                                | 18/212 | 398/17913 | 1.29E-06 | 1.67E-05 | 8.64E-06 | RHOA/CD44/HDA    | 18 | GO |
| GO:0014909 | smooth muscle cell migration                                    | 9/212  | 91/17913  | 1.30E-06 | 1.68E-05 | 8.69E-06 | APEX1/ITGB3/LRF  | 9  | GO |

|            |                                                                                                 |        |           |          |          |          |                  |       |
|------------|-------------------------------------------------------------------------------------------------|--------|-----------|----------|----------|----------|------------------|-------|
| GO:0048754 | branching morphogenesis of an epithelial tube                                                   | 11/212 | 146/17913 | 1.33E-06 | 1.71E-05 | 8.88E-06 | ABL1/CASR/EPHA   | 11 GO |
| GO:0090066 | regulation of anatomical structure size                                                         | 19/212 | 442/17913 | 1.38E-06 | 1.77E-05 | 9.16E-06 | ABL1/ACTN2/APC   | 19 GO |
| GO:0061138 | morphogenesis of a branching epithelium                                                         | 12/212 | 178/17913 | 1.43E-06 | 1.83E-05 | 9.47E-06 | ABL1/CASR/EPHA   | 12 GO |
| GO:0051052 | regulation of DNA metabolic process                                                             | 18/212 | 403/17913 | 1.54E-06 | 1.96E-05 | 1.02E-05 | PARP1/PTK2B/JU   | 18 GO |
| GO:1901216 | positive regulation of neuron death                                                             | 9/212  | 93/17913  | 1.56E-06 | 1.99E-05 | 1.03E-05 | ABL1/PARP1/RHC   | 9 GO  |
| GO:1905477 | positive regulation of protein localization to membrane                                         | 10/212 | 120/17913 | 1.63E-06 | 2.06E-05 | 1.07E-05 | EPHA2/ERBB2/ITC  | 10 GO |
| GO:0001655 | urogenital system development                                                                   | 16/212 | 324/17913 | 1.65E-06 | 2.08E-05 | 1.08E-05 | CRKL/GLI3/SMAD   | 16 GO |
| GO:0019058 | viral life cycle                                                                                | 16/212 | 324/17913 | 1.65E-06 | 2.08E-05 | 1.08E-05 | APOE/CD4/DDX5,   | 16 GO |
| GO:0003012 | muscle system process                                                                           | 19/212 | 448/17913 | 1.68E-06 | 2.11E-05 | 1.09E-05 | ACTN2/PARP1/R    | 19 GO |
| GO:0007015 | actin filament organization                                                                     | 16/212 | 325/17913 | 1.72E-06 | 2.15E-05 | 1.11E-05 | ABL1/ACTN2/RHC   | 16 GO |
| GO:0097696 | STAT cascade                                                                                    | 11/212 | 150/17913 | 1.74E-06 | 2.17E-05 | 1.12E-05 | F2/IFNAR1/IL6ST, | 11 GO |
| GO:0045637 | regulation of myeloid cell differentiation                                                      | 14/212 | 250/17913 | 1.75E-06 | 2.17E-05 | 1.12E-05 | CD4/EP300/PTK2   | 14 GO |
| GO:0090101 | negative regulation of transmembrane receptor protein serine/threonine kinase signaling pathway | 10/212 | 121/17913 | 1.76E-06 | 2.18E-05 | 1.13E-05 | ABL1/SMAD2/SM    | 10 GO |
| GO:0010876 | lipid localization                                                                              | 17/212 | 366/17913 | 1.79E-06 | 2.21E-05 | 1.15E-05 | APOB/APOE/ITGE   | 17 GO |
| GO:0052548 | regulation of endopeptidase activity                                                            | 17/212 | 370/17913 | 2.08E-06 | 2.55E-05 | 1.32E-05 | RHOA/CD44/HDA    | 17 GO |
| GO:0050769 | positive regulation of neurogenesis                                                             | 19/212 | 455/17913 | 2.11E-06 | 2.59E-05 | 1.34E-05 | APOE/RHOA/CRK    | 19 GO |
| GO:0001935 | endothelial cell proliferation                                                                  | 12/212 | 185/17913 | 2.15E-06 | 2.62E-05 | 1.36E-05 | APOE/EPHA2/ITG   | 12 GO |
| GO:1902905 | positive regulation of supramolecular fiber organization                                        | 12/212 | 185/17913 | 2.15E-06 | 2.62E-05 | 1.36E-05 | ABL1/ACTN2/APC   | 12 GO |
| GO:0097242 | amyloid-beta clearance                                                                          | 6/212  | 33/17913  | 2.17E-06 | 2.64E-05 | 1.37E-05 | APOE/HDAC1/ITC   | 6 GO  |
| GO:0060249 | anatomical structure homeostasis                                                                | 18/212 | 413/17913 | 2.18E-06 | 2.64E-05 | 1.37E-05 | SERPINA3/PARP1   | 18 GO |
| GO:0072074 | kidney mesenchyme development                                                                   | 5/212  | 19/17913  | 2.25E-06 | 2.72E-05 | 1.41E-05 | SMAD4/MYC/PA     | 5 GO  |
| GO:0032872 | regulation of stress-activated MAPK cascade                                                     | 13/212 | 220/17913 | 2.28E-06 | 2.75E-05 | 1.42E-05 | DUSP3/PTK2B/NE   | 13 GO |
| GO:0006816 | calcium ion transport                                                                           | 18/212 | 415/17913 | 2.33E-06 | 2.80E-05 | 1.45E-05 | ABL1/RHOA/CASI   | 18 GO |
| GO:0045862 | positive regulation of proteolysis                                                              | 16/212 | 333/17913 | 2.36E-06 | 2.82E-05 | 1.46E-05 | APOE/RHOA/DAB    | 16 GO |
| GO:0007043 | cell-cell junction assembly                                                                     | 9/212  | 98/17913  | 2.43E-06 | 2.91E-05 | 1.51E-05 | APC/RHOA/RHOC    | 9 GO  |
| GO:0097553 | calcium ion transmembrane import into cytosol                                                   | 10/212 | 126/17913 | 2.55E-06 | 3.03E-05 | 1.57E-05 | ABL1/F2/PTK2B/L  | 10 GO |
| GO:0090288 | negative regulation of cellular response to growth factor stimulus                              | 11/212 | 156/17913 | 2.56E-06 | 3.04E-05 | 1.58E-05 | ABL1/SMAD2/SM    | 11 GO |
| GO:0014706 | striated muscle tissue development                                                              | 17/212 | 376/17913 | 2.58E-06 | 3.06E-05 | 1.58E-05 | ACTN2/RHOA/DD    | 17 GO |
| GO:0045216 | cell-cell junction organization                                                                 | 10/212 | 128/17913 | 2.94E-06 | 3.47E-05 | 1.80E-05 | APC/RHOA/RHOC    | 10 GO |
| GO:0030878 | thyroid gland development                                                                       | 5/212  | 20/17913  | 2.97E-06 | 3.50E-05 | 1.81E-05 | SMAD3/MAPK1/     | 5 GO  |
| GO:1903532 | positive regulation of secretion by cell                                                        | 17/212 | 381/17913 | 3.08E-06 | 3.62E-05 | 1.87E-05 | ABL1/CASR/FGR/   | 17 GO |
| GO:0035335 | peptidyl-tyrosine dephosphorylation                                                             | 9/212  | 101/17913 | 3.13E-06 | 3.66E-05 | 1.90E-05 | DUSP3/PTPN1/PT   | 9 GO  |
| GO:2000379 | positive regulation of reactive oxygen species metabolic process                                | 9/212  | 101/17913 | 3.13E-06 | 3.66E-05 | 1.90E-05 | F2/PTK2B/ITGB2/  | 9 GO  |
| GO:0010595 | positive regulation of endothelial cell migration                                               | 10/212 | 129/17913 | 3.15E-06 | 3.66E-05 | 1.90E-05 | ABL1/RHOB/PTK2   | 10 GO |
| GO:1903364 | positive regulation of cellular protein catabolic process                                       | 10/212 | 129/17913 | 3.15E-06 | 3.66E-05 | 1.90E-05 | APOE/DAB2/PTK2   | 10 GO |
| GO:0001763 | morphogenesis of a branching structure                                                          | 12/212 | 192/17913 | 3.16E-06 | 3.66E-05 | 1.90E-05 | ABL1/CASR/EPHA   | 12 GO |
| GO:0010611 | regulation of cardiac muscle hypertrophy                                                        | 8/212  | 76/17913  | 3.19E-06 | 3.68E-05 | 1.91E-05 | PARP1/IL6ST/SM,  | 8 GO  |
| GO:0001701 | in utero embryonic development                                                                  | 16/212 | 342/17913 | 3.32E-06 | 3.82E-05 | 1.98E-05 | APOB/GLI3/SMAI   | 16 GO |
| GO:0031099 | regeneration                                                                                    | 12/212 | 194/17913 | 3.52E-06 | 4.04E-05 | 2.09E-05 | CCND1/GLI3/JUN   | 12 GO |
| GO:0014812 | muscle cell migration                                                                           | 9/212  | 103/17913 | 3.69E-06 | 4.22E-05 | 2.19E-05 | APEX1/ITGB3/LRF  | 9 GO  |
| GO:0010742 | macrophage derived foam cell differentiation                                                    | 6/212  | 36/17913  | 3.71E-06 | 4.22E-05 | 2.19E-05 | APOB/EP300/ITG   | 6 GO  |
| GO:0090077 | foam cell differentiation                                                                       | 6/212  | 36/17913  | 3.71E-06 | 4.22E-05 | 2.19E-05 | APOB/EP300/ITG   | 6 GO  |
| GO:1903362 | regulation of cellular protein catabolic process                                                | 13/212 | 230/17913 | 3.72E-06 | 4.23E-05 | 2.19E-05 | APOE/ARAF/DAB,   | 13 GO |
| GO:0022604 | regulation of cell morphogenesis                                                                | 18/212 | 430/17913 | 3.83E-06 | 4.34E-05 | 2.25E-05 | ABL1/APOE/RHO,   | 18 GO |
| GO:0060396 | growth hormone receptor signaling pathway                                                       | 5/212  | 21/17913  | 3.86E-06 | 4.36E-05 | 2.26E-05 | LYN/PIK3R1/PRLR  | 5 GO  |
| GO:0033143 | regulation of intracellular steroid hormone receptor signaling pathway                          | 8/212  | 78/17913  | 3.89E-06 | 4.38E-05 | 2.27E-05 | PARP1/RHOA/DA    | 8 GO  |
| GO:0007548 | sex differentiation                                                                             | 14/212 | 269/17913 | 4.11E-06 | 4.60E-05 | 2.38E-05 | CCND1/CASP3/CE   | 14 GO |
| GO:0072593 | reactive oxygen species metabolic process                                                       | 14/212 | 269/17913 | 4.11E-06 | 4.60E-05 | 2.38E-05 | RHOA/F2/PTK2B/   | 14 GO |
| GO:0014743 | regulation of muscle hypertrophy                                                                | 8/212  | 79/17913  | 4.28E-06 | 4.78E-05 | 2.48E-05 | PARP1/IL6ST/SM,  | 8 GO  |

|            |                                                                     |        |           |          |          |          |                  |    |    |
|------------|---------------------------------------------------------------------|--------|-----------|----------|----------|----------|------------------|----|----|
| GO:0030260 | entry into host cell                                                | 10/212 | 134/17913 | 4.44E-06 | 4.90E-05 | 2.54E-05 | CBL/CD4/CDH1/C   | 10 | GO |
| GO:0044409 | entry into host                                                     | 10/212 | 134/17913 | 4.44E-06 | 4.90E-05 | 2.54E-05 | CBL/CD4/CDH1/C   | 10 | GO |
| GO:0051806 | entry into cell of other organism involved in symbiotic interaction | 10/212 | 134/17913 | 4.44E-06 | 4.90E-05 | 2.54E-05 | CBL/CD4/CDH1/C   | 10 | GO |
| GO:0051828 | entry into other organism involved in symbiotic interaction         | 10/212 | 134/17913 | 4.44E-06 | 4.90E-05 | 2.54E-05 | CBL/CD4/CDH1/C   | 10 | GO |
| GO:0001501 | skeletal system development                                         | 19/212 | 479/17913 | 4.46E-06 | 4.90E-05 | 2.54E-05 | RHOA/CD44/EPH    | 19 | GO |
| GO:0050727 | regulation of inflammatory response                                 | 19/212 | 479/17913 | 4.46E-06 | 4.90E-05 | 2.54E-05 | APOE/CD59/CDH1   | 19 | GO |
| GO:0009314 | response to radiation                                               | 18/212 | 435/17913 | 4.50E-06 | 4.93E-05 | 2.55E-05 | PARP1/RHOB/CCI   | 18 | GO |
| GO:0060390 | regulation of SMAD protein signal transduction                      | 5/212  | 22/17913  | 4.95E-06 | 5.40E-05 | 2.80E-05 | PARP1/DAB2/SM    | 5  | GO |
| GO:0071378 | cellular response to growth hormone stimulus                        | 5/212  | 22/17913  | 4.95E-06 | 5.40E-05 | 2.80E-05 | LYN/PIK3R1/PRLR  | 5  | GO |
| GO:0007623 | circadian rhythm                                                    | 12/212 | 201/17913 | 5.07E-06 | 5.51E-05 | 2.86E-05 | EP300/HDAC1/JU   | 12 | GO |
| GO:0042176 | regulation of protein catabolic process                             | 16/212 | 354/17913 | 5.15E-06 | 5.59E-05 | 2.89E-05 | APC/APOE/ARAF    | 16 | GO |
| GO:0051402 | neuron apoptotic process                                            | 13/212 | 238/17913 | 5.41E-06 | 5.85E-05 | 3.03E-05 | PARP1/RHOA/CA    | 13 | GO |
| GO:0001822 | kidney development                                                  | 14/212 | 276/17913 | 5.52E-06 | 5.96E-05 | 3.09E-05 | GLI3/SMAD1/SM    | 14 | GO |
| GO:0051056 | regulation of small GTPase mediated signal transduction             | 15/212 | 316/17913 | 5.69E-06 | 6.12E-05 | 3.17E-05 | ABL1/APOE/RHO    | 15 | GO |
| GO:0050728 | negative regulation of inflammatory response                        | 11/212 | 170/17913 | 5.88E-06 | 6.31E-05 | 3.27E-05 | APOE/CDH5/F2/L   | 11 | GO |
| GO:0045580 | regulation of T cell differentiation                                | 10/212 | 139/17913 | 6.16E-06 | 6.59E-05 | 3.42E-05 | ABL1/RHOA/ERB    | 10 | GO |
| GO:0071216 | cellular response to biotic stimulus                                | 12/212 | 206/17913 | 6.52E-06 | 6.96E-05 | 3.61E-05 | ABL1/RHOA/LYN    | 12 | GO |
| GO:0007163 | establishment or maintenance of cell polarity                       | 11/212 | 172/17913 | 6.57E-06 | 7.00E-05 | 3.63E-05 | RHOA/CDH5/CRK    | 11 | GO |
| GO:0051656 | establishment of organelle localization                             | 18/212 | 448/17913 | 6.74E-06 | 7.16E-05 | 3.71E-05 | CBL/CD59/DCTN1   | 18 | GO |
| GO:1902893 | regulation of pri-miRNA transcription by RNA polymerase II          | 6/212  | 40/17913  | 7.02E-06 | 7.44E-05 | 3.86E-05 | JUN/SMAD1/SM     | 6  | GO |
| GO:0046651 | lymphocyte proliferation                                            | 13/212 | 244/17913 | 7.09E-06 | 7.49E-05 | 3.88E-05 | ABL1/CASP3/CD4   | 13 | GO |
| GO:0051209 | release of sequestered calcium ion into cytosol                     | 9/212  | 112/17913 | 7.36E-06 | 7.74E-05 | 4.01E-05 | ABL1/F2/PTK2B/L  | 9  | GO |
| GO:0051283 | negative regulation of sequestering of calcium ion                  | 9/212  | 112/17913 | 7.36E-06 | 7.74E-05 | 4.01E-05 | ABL1/F2/PTK2B/L  | 9  | GO |
| GO:0046427 | positive regulation of JAK-STAT cascade                             | 8/212  | 85/17913  | 7.43E-06 | 7.79E-05 | 4.04E-05 | F2/PTK2B/IL6ST/I | 8  | GO |
| GO:0010256 | endomembrane system organization                                    | 16/212 | 365/17913 | 7.58E-06 | 7.92E-05 | 4.11E-05 | DCTN1/PLK1/SRG   | 16 | GO |
| GO:0045861 | negative regulation of proteolysis                                  | 15/212 | 324/17913 | 7.68E-06 | 8.01E-05 | 4.15E-05 | CD44/CD59/F2/P   | 15 | GO |
| GO:0032943 | mononuclear cell proliferation                                      | 13/212 | 246/17913 | 7.74E-06 | 8.05E-05 | 4.17E-05 | ABL1/CASP3/CD4   | 13 | GO |
| GO:0016055 | Wnt signaling pathway                                               | 19/212 | 498/17913 | 7.77E-06 | 8.07E-05 | 4.18E-05 | ABL1/APC/APOE/   | 19 | GO |
| GO:1903649 | regulation of cytoplasmic transport                                 | 5/212  | 24/17913  | 7.84E-06 | 8.11E-05 | 4.20E-05 | DAB2/MAPK1/M     | 5  | GO |
| GO:0051047 | positive regulation of secretion                                    | 17/212 | 409/17913 | 7.88E-06 | 8.14E-05 | 4.22E-05 | ABL1/CASR/FGR/   | 17 | GO |
| GO:0070838 | divalent metal ion transport                                        | 18/212 | 454/17913 | 8.09E-06 | 8.33E-05 | 4.32E-05 | ABL1/RHOA/CAS    | 18 | GO |
| GO:0198738 | cell-cell signaling by wnt                                          | 19/212 | 500/17913 | 8.23E-06 | 8.45E-05 | 4.38E-05 | ABL1/APC/APOE/   | 19 | GO |
| GO:0010212 | response to ionizing radiation                                      | 10/212 | 144/17913 | 8.43E-06 | 8.64E-05 | 4.48E-05 | PARP1/RHOB/CCI   | 10 | GO |
| GO:0051282 | regulation of sequestering of calcium ion                           | 9/212  | 114/17913 | 8.51E-06 | 8.70E-05 | 4.51E-05 | ABL1/F2/PTK2B/L  | 9  | GO |
| GO:0042098 | T cell proliferation                                                | 11/212 | 177/17913 | 8.64E-06 | 8.79E-05 | 4.55E-05 | ABL1/CASP3/CD4   | 11 | GO |
| GO:0043112 | receptor metabolic process                                          | 11/212 | 177/17913 | 8.64E-06 | 8.79E-05 | 4.55E-05 | APOE/DLG4/HDA    | 11 | GO |
| GO:0050678 | regulation of epithelial cell proliferation                         | 16/212 | 369/17913 | 8.68E-06 | 8.81E-05 | 4.57E-05 | APOE/CCND1/ERI   | 16 | GO |
| GO:0048568 | embryonic organ development                                         | 17/212 | 413/17913 | 8.95E-06 | 9.06E-05 | 4.69E-05 | EPHA2/GLI3/KIT/! | 17 | GO |
| GO:0016311 | dephosphorylation                                                   | 18/212 | 458/17913 | 9.11E-06 | 9.18E-05 | 4.76E-05 | APEX1/DUSP3/IN   | 18 | GO |
| GO:0072511 | divalent inorganic cation transport                                 | 18/212 | 458/17913 | 9.11E-06 | 9.18E-05 | 4.76E-05 | ABL1/RHOA/CAS    | 18 | GO |
| GO:0090257 | regulation of muscle system process                                 | 13/212 | 251/17913 | 9.61E-06 | 9.65E-05 | 5.00E-05 | PARP1/RHOA/IL6   | 13 | GO |
| GO:1904894 | positive regulation of STAT cascade                                 | 8/212  | 88/17913  | 9.63E-06 | 9.65E-05 | 5.00E-05 | F2/PTK2B/IL6ST/I | 8  | GO |
| GO:0045787 | positive regulation of cell cycle                                   | 16/212 | 373/17913 | 9.93E-06 | 9.93E-05 | 5.15E-05 | ABL1/APEX1/RHC   | 16 | GO |
| GO:0072001 | renal system development                                            | 14/212 | 291/17913 | 1.01E-05 | 1.01E-04 | 5.21E-05 | GLI3/SMAD1/SM    | 14 | GO |
| GO:0071236 | cellular response to antibiotic                                     | 10/212 | 147/17913 | 1.01E-05 | 1.01E-04 | 5.22E-05 | ABL1/APEX1/RHC   | 10 | GO |
| GO:0045727 | positive regulation of translation                                  | 9/212  | 117/17913 | 1.05E-05 | 1.04E-04 | 5.40E-05 | RHOA/ERBB2/PTI   | 9  | GO |
| GO:0051208 | sequestering of calcium ion                                         | 9/212  | 117/17913 | 1.05E-05 | 1.04E-04 | 5.40E-05 | ABL1/F2/PTK2B/L  | 9  | GO |
| GO:0071364 | cellular response to epidermal growth factor stimulus               | 6/212  | 43/17913  | 1.08E-05 | 1.07E-04 | 5.54E-05 | CBL/DUSP3/ERBB   | 6  | GO |
| GO:0008406 | gonad development                                                   | 12/212 | 217/17913 | 1.10E-05 | 1.09E-04 | 5.64E-05 | CCND1/CASP3/CE   | 12 | GO |



|            |                                                                 |        |           |          |          |          |                 |       |
|------------|-----------------------------------------------------------------|--------|-----------|----------|----------|----------|-----------------|-------|
| GO:0043534 | blood vessel endothelial cell migration                         | 11/212 | 182/17913 | 1.12E-05 | 1.10E-04 | 5.71E-05 | ABL1/APOE/RHO,  | 11 GO |
| GO:1903708 | positive regulation of hemopoiesis                              | 11/212 | 182/17913 | 1.12E-05 | 1.10E-04 | 5.71E-05 | RHOA/CD4/GLI3/  | 11 GO |
| GO:1904888 | cranial skeletal system development                             | 7/212  | 65/17913  | 1.15E-05 | 1.12E-04 | 5.81E-05 | CRKL/GLI3/SMAD  | 7 GO  |
| GO:0016049 | cell growth                                                     | 18/212 | 466/17913 | 1.15E-05 | 1.12E-04 | 5.83E-05 | ABL1/APOE/RHO,  | 18 GO |
| GO:0016485 | protein processing                                              | 14/212 | 295/17913 | 1.18E-05 | 1.14E-04 | 5.92E-05 | PARP1/CASP3/CC  | 14 GO |
| GO:0032496 | response to lipopolysaccharide                                  | 14/212 | 295/17913 | 1.18E-05 | 1.14E-04 | 5.92E-05 | ABL1/APOB/RHO.  | 14 GO |
| GO:0050714 | positive regulation of protein secretion                        | 13/212 | 256/17913 | 1.19E-05 | 1.15E-04 | 5.96E-05 | ABL1/CASR/FGR/  | 13 GO |
| GO:0034599 | cellular response to oxidative stress                           | 14/212 | 296/17913 | 1.22E-05 | 1.18E-04 | 6.12E-05 | ABL1/PARP1/APE  | 14 GO |
| GO:0030225 | macrophage differentiation                                      | 6/212  | 44/17913  | 1.24E-05 | 1.20E-04 | 6.19E-05 | PARP1/CD4/PRKC  | 6 GO  |
| GO:0035196 | production of miRNAs involved in gene silencing by miRNA        | 6/212  | 44/17913  | 1.24E-05 | 1.20E-04 | 6.19E-05 | DDX5/SMAD1/SN   | 6 GO  |
| GO:0048308 | organelle inheritance                                           | 4/212  | 13/17913  | 1.25E-05 | 1.20E-04 | 6.21E-05 | MAPK1/MAPK3/    | 4 GO  |
| GO:0048313 | Golgi inheritance                                               | 4/212  | 13/17913  | 1.25E-05 | 1.20E-04 | 6.21E-05 | MAPK1/MAPK3/    | 4 GO  |
| GO:0051917 | regulation of fibrinolysis                                      | 4/212  | 13/17913  | 1.25E-05 | 1.20E-04 | 6.21E-05 | F2/SERPINE1/PLC | 4 GO  |
| GO:1905952 | regulation of lipid localization                                | 10/212 | 151/17913 | 1.28E-05 | 1.22E-04 | 6.33E-05 | APOB/APOE/ITGE  | 10 GO |
| GO:0060485 | mesenchyme development                                          | 13/212 | 258/17913 | 1.29E-05 | 1.23E-04 | 6.35E-05 | DAB2/DDX5/SMA   | 13 GO |
| GO:0008630 | intrinsic apoptotic signaling pathway in response to DNA damage | 8/212  | 92/17913  | 1.34E-05 | 1.27E-04 | 6.58E-05 | ABL1/CD44/EPHA  | 8 GO  |
| GO:0048871 | multicellular organismal homeostasis                            | 18/212 | 472/17913 | 1.37E-05 | 1.30E-04 | 6.71E-05 | SERPINA3/APC/P' | 18 GO |
| GO:0050920 | regulation of chemotaxis                                        | 11/212 | 186/17913 | 1.38E-05 | 1.30E-04 | 6.75E-05 | CASR/DUSP3/PTK  | 11 GO |
| GO:0043500 | muscle adaptation                                               | 9/212  | 121/17913 | 1.38E-05 | 1.30E-04 | 6.75E-05 | PARP1/IL6ST/SM, | 9 GO  |
| GO:0001649 | osteoblast differentiation                                      | 12/212 | 222/17913 | 1.39E-05 | 1.31E-04 | 6.77E-05 | DDX5/EPHA2/GLI  | 12 GO |
| GO:0016579 | protein deubiquitination                                        | 13/212 | 260/17913 | 1.40E-05 | 1.31E-04 | 6.80E-05 | APC/RHOA/EP300  | 13 GO |
| GO:0010812 | negative regulation of cell-substrate adhesion                  | 7/212  | 67/17913  | 1.40E-05 | 1.31E-04 | 6.81E-05 | RHOA/LRP1/SERP  | 7 GO  |
| GO:0030111 | regulation of Wnt signaling pathway                             | 15/212 | 341/17913 | 1.41E-05 | 1.32E-04 | 6.82E-05 | ABL1/APC/APOE/  | 15 GO |
| GO:0045137 | development of primary sexual characteristics                   | 12/212 | 223/17913 | 1.45E-05 | 1.35E-04 | 7.01E-05 | CCND1/CASP3/CE  | 12 GO |
| GO:0051090 | regulation of DNA-binding transcription factor activity         | 17/212 | 429/17913 | 1.46E-05 | 1.36E-04 | 7.05E-05 | EP300/ITGB2/JUN | 17 GO |
| GO:0006898 | receptor-mediated endocytosis                                   | 14/212 | 301/17913 | 1.48E-05 | 1.36E-04 | 7.06E-05 | APOB/APOE/CBL,  | 14 GO |
| GO:0032368 | regulation of lipid transport                                   | 9/212  | 122/17913 | 1.48E-05 | 1.36E-04 | 7.06E-05 | APOE/ITGB3/LRP, | 9 GO  |
| GO:0035270 | endocrine system development                                    | 9/212  | 122/17913 | 1.48E-05 | 1.36E-04 | 7.06E-05 | CDH1/CRKL/SMA   | 9 GO  |
| GO:0030595 | leukocyte chemotaxis                                            | 11/212 | 188/17913 | 1.53E-05 | 1.41E-04 | 7.28E-05 | PTK2B/ITGB2/KIT | 11 GO |
| GO:0007030 | Golgi organization                                              | 8/212  | 94/17913  | 1.57E-05 | 1.44E-04 | 7.47E-05 | MAPK1/MAPK3/    | 8 GO  |
| GO:0048538 | thymus development                                              | 6/212  | 46/17913  | 1.62E-05 | 1.48E-04 | 7.68E-05 | ABL1/CRKL/MAPK  | 6 GO  |
| GO:0009749 | response to glucose                                             | 11/212 | 190/17913 | 1.68E-05 | 1.54E-04 | 7.99E-05 | RHOA/CASP3/CA'  | 11 GO |
| GO:0098542 | defense response to other organism                              | 18/212 | 481/17913 | 1.76E-05 | 1.61E-04 | 8.33E-05 | KLK3/CD4/EPHA2  | 18 GO |
| GO:0110053 | regulation of actin filament organization                       | 12/212 | 228/17913 | 1.81E-05 | 1.65E-04 | 8.56E-05 | ABL1/ACTN2/RHC  | 12 GO |
| GO:0042116 | macrophage activation                                           | 8/212  | 96/17913  | 1.83E-05 | 1.67E-04 | 8.63E-05 | ITGB2/JUN/LDLR/ | 8 GO  |
| GO:0045732 | positive regulation of protein catabolic process                | 11/212 | 192/17913 | 1.86E-05 | 1.68E-04 | 8.73E-05 | APC/APOE/DAB2,  | 11 GO |
| GO:0043535 | regulation of blood vessel endothelial cell migration           | 10/212 | 158/17913 | 1.90E-05 | 1.72E-04 | 8.92E-05 | ABL1/APOE/RHO,  | 10 GO |
| GO:0002237 | response to molecule of bacterial origin                        | 14/212 | 309/17913 | 1.98E-05 | 1.78E-04 | 9.21E-05 | ABL1/APOB/RHO.  | 14 GO |
| GO:0030038 | contractile actin filament bundle assembly                      | 8/212  | 97/17913  | 1.98E-05 | 1.78E-04 | 9.21E-05 | ABL1/RHOA/RHO   | 8 GO  |
| GO:0043149 | stress fiber assembly                                           | 8/212  | 97/17913  | 1.98E-05 | 1.78E-04 | 9.21E-05 | ABL1/RHOA/RHO   | 8 GO  |
| GO:0045471 | response to ethanol                                             | 9/212  | 127/17913 | 2.04E-05 | 1.83E-04 | 9.48E-05 | RHOA/CCND1/CB   | 9 GO  |
| GO:0071214 | cellular response to abiotic stimulus                           | 14/212 | 310/17913 | 2.05E-05 | 1.83E-04 | 9.48E-05 | PARP1/RHOB/CA'  | 14 GO |
| GO:0104004 | cellular response to environmental stimulus                     | 14/212 | 310/17913 | 2.05E-05 | 1.83E-04 | 9.48E-05 | PARP1/RHOB/CA'  | 14 GO |
| GO:0001707 | mesoderm formation                                              | 7/212  | 71/17913  | 2.06E-05 | 1.83E-04 | 9.50E-05 | EPHA2/ITGB3/SN  | 7 GO  |
| GO:0043407 | negative regulation of MAP kinase activity                      | 7/212  | 71/17913  | 2.06E-05 | 1.83E-04 | 9.50E-05 | APOE/DUSP3/LYN  | 7 GO  |
| GO:0031050 | dsRNA processing                                                | 6/212  | 48/17913  | 2.08E-05 | 1.84E-04 | 9.51E-05 | DDX5/SMAD1/SN   | 6 GO  |
| GO:0070918 | production of small RNA involved in gene silencing by RNA       | 6/212  | 48/17913  | 2.08E-05 | 1.84E-04 | 9.51E-05 | DDX5/SMAD1/SN   | 6 GO  |
| GO:0001558 | regulation of cell growth                                       | 16/212 | 396/17913 | 2.08E-05 | 1.84E-04 | 9.51E-05 | ABL1/APOE/RHO,  | 16 GO |
| GO:0046627 | negative regulation of insulin receptor signaling pathway       | 5/212  | 29/17913  | 2.09E-05 | 1.84E-04 | 9.51E-05 | GRB10/PRKCB/PF  | 5 GO  |



|            |                                                                                   |        |           |          |          |          |                     |    |    |
|------------|-----------------------------------------------------------------------------------|--------|-----------|----------|----------|----------|---------------------|----|----|
| GO:0070102 | interleukin-6-mediated signaling pathway                                          | 5/212  | 29/17913  | 2.09E-05 | 1.84E-04 | 9.51E-05 | CBL/IL6ST/SMAD4     | 5  | GO |
| GO:0051604 | protein maturation                                                                | 15/212 | 353/17913 | 2.11E-05 | 1.86E-04 | 9.62E-05 | PARP1/CASP3/CCND1   | 15 | GO |
| GO:0046661 | male sex differentiation                                                          | 10/212 | 160/17913 | 2.12E-05 | 1.86E-04 | 9.63E-05 | CCND1/CBL/CRKL      | 10 | GO |
| GO:0050848 | regulation of calcium-mediated signaling                                          | 8/212  | 98/17913  | 2.13E-05 | 1.86E-04 | 9.65E-05 | CD4/PTK2B/PKD2      | 8  | GO |
| GO:0009746 | response to hexose                                                                | 11/212 | 195/17913 | 2.15E-05 | 1.87E-04 | 9.70E-05 | RHOA/CASP3/CASP4    | 11 | GO |
| GO:0006470 | protein dephosphorylation                                                         | 14/212 | 313/17913 | 2.28E-05 | 1.98E-04 | 1.03E-04 | DUSP3/PDGFRB/ITGB3  | 14 | GO |
| GO:0070646 | protein modification by small protein removal                                     | 13/212 | 273/17913 | 2.34E-05 | 2.02E-04 | 1.05E-04 | APC/RHOA/EP300      | 13 | GO |
| GO:0043113 | receptor clustering                                                               | 6/212  | 49/17913  | 2.34E-05 | 2.02E-04 | 1.05E-04 | APOE/CRKL/DLG4      | 6  | GO |
| GO:0035635 | entry of bacterium into host cell                                                 | 4/212  | 15/17913  | 2.35E-05 | 2.02E-04 | 1.05E-04 | CBL/CDH1/CTNNA1     | 4  | GO |
| GO:0048012 | hepatocyte growth factor receptor signaling pathway                               | 4/212  | 15/17913  | 2.35E-05 | 2.02E-04 | 1.05E-04 | MST1R/PAK1/PTFR1    | 4  | GO |
| GO:0090136 | epithelial cell-cell adhesion                                                     | 4/212  | 15/17913  | 2.35E-05 | 2.02E-04 | 1.05E-04 | JUP/KIT/CCN3/VCAM1  | 4  | GO |
| GO:0001819 | positive regulation of cytokine production                                        | 17/212 | 446/17913 | 2.41E-05 | 2.07E-04 | 1.07E-04 | ABL1/CD4/EP300      | 17 | GO |
| GO:0048259 | regulation of receptor-mediated endocytosis                                       | 8/212  | 100/17913 | 2.47E-05 | 2.11E-04 | 1.09E-04 | CBL/DAB2/DLG4/SHC1  | 8  | GO |
| GO:1903050 | regulation of proteolysis involved in cellular protein catabolic process          | 11/212 | 198/17913 | 2.47E-05 | 2.11E-04 | 1.09E-04 | APOE/ARAF/DAB2IP    | 11 | GO |
| GO:0048332 | mesoderm morphogenesis                                                            | 7/212  | 73/17913  | 2.48E-05 | 2.11E-04 | 1.09E-04 | EPHA2/ITGB3/SMPD3   | 7  | GO |
| GO:0010743 | regulation of macrophage derived foam cell differentiation                        | 5/212  | 30/17913  | 2.48E-05 | 2.11E-04 | 1.09E-04 | APOB/ITGB3/PLA2G1B  | 5  | GO |
| GO:1902895 | positive regulation of pri-miRNA transcription by RNA polymerase II               | 5/212  | 30/17913  | 2.48E-05 | 2.11E-04 | 1.09E-04 | JUN/SMAD1/SMAD3     | 5  | GO |
| GO:0002695 | negative regulation of leukocyte activation                                       | 10/212 | 163/17913 | 2.49E-05 | 2.11E-04 | 1.09E-04 | CASP3/DUSP3/ERK1    | 10 | GO |
| GO:0002793 | positive regulation of peptide secretion                                          | 13/212 | 275/17913 | 2.53E-05 | 2.14E-04 | 1.11E-04 | ABL1/CASR/FGR4      | 13 | GO |
| GO:0042692 | muscle cell differentiation                                                       | 15/212 | 359/17913 | 2.57E-05 | 2.17E-04 | 1.13E-04 | ABL1/ACTN2/CASR     | 15 | GO |
| GO:1990778 | protein localization to cell periphery                                            | 13/212 | 276/17913 | 2.62E-05 | 2.21E-04 | 1.15E-04 | ACTN2/CDH1/DAAM1    | 13 | GO |
| GO:0018107 | peptidyl-threonine phosphorylation                                                | 8/212  | 101/17913 | 2.65E-05 | 2.23E-04 | 1.15E-04 | SMAD7/PLK1/PRI      | 8  | GO |
| GO:0031348 | negative regulation of defense response                                           | 12/212 | 237/17913 | 2.66E-05 | 2.23E-04 | 1.15E-04 | APOE/CDH5/F2L       | 12 | GO |
| GO:0048863 | stem cell differentiation                                                         | 12/212 | 237/17913 | 2.66E-05 | 2.23E-04 | 1.15E-04 | ABL1/BCHE/KIT/SMPD3 | 12 | GO |
| GO:0060291 | long-term synaptic potentiation                                                   | 7/212  | 74/17913  | 2.71E-05 | 2.26E-04 | 1.17E-04 | ABL1/APOE/PTK2      | 7  | GO |
| GO:0009612 | response to mechanical stimulus                                                   | 11/212 | 200/17913 | 2.71E-05 | 2.26E-04 | 1.17E-04 | RHOA/PTK2B/JUN      | 11 | GO |
| GO:0034284 | response to monosaccharide                                                        | 11/212 | 200/17913 | 2.71E-05 | 2.26E-04 | 1.17E-04 | RHOA/CASP3/CASP4    | 11 | GO |
| GO:0002683 | negative regulation of immune system process                                      | 17/212 | 451/17913 | 2.77E-05 | 2.30E-04 | 1.19E-04 | CASP3/CD59/DUSP3    | 17 | GO |
| GO:0045165 | cell fate commitment                                                              | 12/212 | 238/17913 | 2.77E-05 | 2.30E-04 | 1.19E-04 | RHOA/CASP3/GLI3     | 12 | GO |
| GO:0031346 | positive regulation of cell projection organization                               | 15/212 | 362/17913 | 2.83E-05 | 2.34E-04 | 1.21E-04 | APC/APOE/RHOA       | 15 | GO |
| GO:2001020 | regulation of response to DNA damage stimulus                                     | 11/212 | 201/17913 | 2.84E-05 | 2.35E-04 | 1.22E-04 | ABL1/PARP1/CD4      | 11 | GO |
| GO:1900077 | negative regulation of cellular response to insulin stimulus                      | 5/212  | 31/17913  | 2.93E-05 | 2.42E-04 | 1.25E-04 | GRB10/PRKCB/PFKFB3  | 5  | GO |
| GO:0071887 | leukocyte apoptotic process                                                       | 8/212  | 103/17913 | 3.06E-05 | 2.52E-04 | 1.31E-04 | CASP3/CRKL/GLI3     | 8  | GO |
| GO:0071248 | cellular response to metal ion                                                    | 10/212 | 167/17913 | 3.07E-05 | 2.52E-04 | 1.31E-04 | PARP1/CDH1/DLC1     | 10 | GO |
| GO:0030397 | membrane disassembly                                                              | 4/212  | 16/17913  | 3.10E-05 | 2.54E-04 | 1.32E-04 | DCTN1/PLK1/PRK      | 4  | GO |
| GO:0051081 | nuclear envelope disassembly                                                      | 4/212  | 16/17913  | 3.10E-05 | 2.54E-04 | 1.32E-04 | DCTN1/PLK1/PRK      | 4  | GO |
| GO:0050792 | regulation of viral process                                                       | 11/212 | 204/17913 | 3.25E-05 | 2.66E-04 | 1.38E-04 | APOE/CD4/DDX5       | 11 | GO |
| GO:0010975 | regulation of neuron projection development                                       | 17/212 | 458/17913 | 3.36E-05 | 2.74E-04 | 1.42E-04 | ABL1/APOE/RHOA      | 17 | GO |
| GO:0048167 | regulation of synaptic plasticity                                                 | 10/212 | 169/17913 | 3.40E-05 | 2.76E-04 | 1.43E-04 | ABL1/APOE/DLG4      | 10 | GO |
| GO:0097421 | liver regeneration                                                                | 5/212  | 32/17913  | 3.44E-05 | 2.79E-04 | 1.45E-04 | CCND1/GLI3/PCN      | 5  | GO |
| GO:0051851 | modification by host of symbiont morphology or physiology                         | 7/212  | 77/17913  | 3.51E-05 | 2.85E-04 | 1.47E-04 | APOE/EP300/F2L      | 7  | GO |
| GO:0001936 | regulation of endothelial cell proliferation                                      | 10/212 | 170/17913 | 3.57E-05 | 2.89E-04 | 1.50E-04 | APOE/ITGB3/JUN      | 10 | GO |
| GO:0008584 | male gonad development                                                            | 9/212  | 137/17913 | 3.72E-05 | 3.00E-04 | 1.55E-04 | CCND1/CBL/CRKL      | 9  | GO |
| GO:0015718 | monocarboxylic acid transport                                                     | 9/212  | 137/17913 | 3.72E-05 | 3.00E-04 | 1.55E-04 | APOE/CASR/PLA2      | 9  | GO |
| GO:0043502 | regulation of muscle adaptation                                                   | 8/212  | 106/17913 | 3.77E-05 | 3.03E-04 | 1.57E-04 | PARP1/IL6ST/SMAD4   | 8  | GO |
| GO:0010827 | regulation of glucose transmembrane transport                                     | 7/212  | 78/17913  | 3.82E-05 | 3.06E-04 | 1.58E-04 | GRB10/PIK3R1/PI3K   | 7  | GO |
| GO:0030512 | negative regulation of transforming growth factor beta receptor signaling pathway | 7/212  | 78/17913  | 3.82E-05 | 3.06E-04 | 1.58E-04 | SMAD2/SMAD3/SMAD4   | 7  | GO |
| GO:0046546 | development of primary male sexual characteristics                                | 9/212  | 138/17913 | 3.94E-05 | 3.15E-04 | 1.63E-04 | CCND1/CBL/CRKL      | 9  | GO |
| GO:0045089 | positive regulation of innate immune response                                     | 15/212 | 373/17913 | 3.99E-05 | 3.18E-04 | 1.65E-04 | APOB/EP300/ITGB3    | 15 | GO |

|            |                                                                                      |        |           |          |          |          |                 |       |
|------------|--------------------------------------------------------------------------------------|--------|-----------|----------|----------|----------|-----------------|-------|
| GO:0007616 | long-term memory                                                                     | 5/212  | 33/17913  | 4.01E-05 | 3.19E-04 | 1.65E-04 | APOE/LDLR/PRKC  | 5 GO  |
| GO:0055094 | response to lipoprotein particle                                                     | 5/212  | 33/17913  | 4.01E-05 | 3.19E-04 | 1.65E-04 | APOE/CASR/ITGB  | 5 GO  |
| GO:0035855 | megakaryocyte development                                                            | 4/212  | 17/17913  | 4.02E-05 | 3.19E-04 | 1.65E-04 | EP300/KIT/PTPNE | 4 GO  |
| GO:1904659 | glucose transmembrane transport                                                      | 8/212  | 107/17913 | 4.03E-05 | 3.19E-04 | 1.65E-04 | GRB10/PIK3R1/PI | 8 GO  |
| GO:0010524 | positive regulation of calcium ion transport into cytosol                            | 6/212  | 54/17913  | 4.12E-05 | 3.25E-04 | 1.69E-04 | ABL1/CD4/F2/PKI | 6 GO  |
| GO:0097581 | lamellipodium organization                                                           | 7/212  | 79/17913  | 4.15E-05 | 3.27E-04 | 1.69E-04 | CD44/EPHA2/KIT, | 7 GO  |
| GO:0003300 | cardiac muscle hypertrophy                                                           | 8/212  | 108/17913 | 4.31E-05 | 3.39E-04 | 1.76E-04 | PARP1/IL6ST/SM, | 8 GO  |
| GO:0016482 | cytosolic transport                                                                  | 9/212  | 140/17913 | 4.41E-05 | 3.47E-04 | 1.80E-04 | DAB2/DCTN1/MA   | 9 GO  |
| GO:1903845 | negative regulation of cellular response to transforming growth factor beta stimulus | 7/212  | 80/17913  | 4.50E-05 | 3.53E-04 | 1.83E-04 | SMAD2/SMAD3/    | 7 GO  |
| GO:0018210 | peptidyl-threonine modification                                                      | 8/212  | 109/17913 | 4.60E-05 | 3.60E-04 | 1.87E-04 | SMAD7/PLK1/PRI  | 8 GO  |
| GO:0030198 | extracellular matrix organization                                                    | 14/212 | 334/17913 | 4.64E-05 | 3.62E-04 | 1.88E-04 | ABL1/CD44/CDH1  | 14 GO |
| GO:0071222 | cellular response to lipopolysaccharide                                              | 10/212 | 176/17913 | 4.80E-05 | 3.74E-04 | 1.94E-04 | ABL1/RHOA/LYN/  | 10 GO |
| GO:0046849 | bone remodeling                                                                      | 7/212  | 81/17913  | 4.88E-05 | 3.79E-04 | 1.96E-04 | EPHA2/PTK2B/INI | 7 GO  |
| GO:0051702 | interaction with symbiont                                                            | 7/212  | 81/17913  | 4.88E-05 | 3.79E-04 | 1.96E-04 | APOE/EP300/F2/I | 7 GO  |
| GO:0070663 | regulation of leukocyte proliferation                                                | 11/212 | 214/17913 | 5.04E-05 | 3.90E-04 | 2.02E-04 | CASP3/CD4/ERBB  | 11 GO |
| GO:0038083 | peptidyl-tyrosine autophosphorylation                                                | 4/212  | 18/17913  | 5.12E-05 | 3.96E-04 | 2.05E-04 | ABL1/PTK2B/MAI  | 4 GO  |
| GO:0090330 | regulation of platelet aggregation                                                   | 4/212  | 18/17913  | 5.12E-05 | 3.96E-04 | 2.05E-04 | LYN/PRKCA/PRKC  | 4 GO  |
| GO:0043010 | camera-type eye development                                                          | 13/212 | 295/17913 | 5.22E-05 | 4.02E-04 | 2.08E-04 | EPHA2/GLI3/HDA  | 13 GO |
| GO:0014897 | striated muscle hypertrophy                                                          | 8/212  | 111/17913 | 5.24E-05 | 4.03E-04 | 2.09E-04 | PARP1/IL6ST/SM, | 8 GO  |
| GO:0007369 | gastrulation                                                                         | 10/212 | 178/17913 | 5.28E-05 | 4.05E-04 | 2.10E-04 | EPHA2/ITGB2/ITC | 10 GO |
| GO:2000060 | positive regulation of ubiquitin-dependent protein catabolic process                 | 7/212  | 82/17913  | 5.28E-05 | 4.05E-04 | 2.10E-04 | DAB2/PTK2B/SM,  | 7 GO  |
| GO:0007528 | neuromuscular junction development                                                   | 5/212  | 35/17913  | 5.38E-05 | 4.10E-04 | 2.13E-04 | CRKL/DCTN1/ERB  | 5 GO  |
| GO:0060416 | response to growth hormone                                                           | 5/212  | 35/17913  | 5.38E-05 | 4.10E-04 | 2.13E-04 | LYN/PIK3R1/PRLR | 5 GO  |
| GO:0071402 | cellular response to lipoprotein particle stimulus                                   | 5/212  | 35/17913  | 5.38E-05 | 4.10E-04 | 2.13E-04 | APOE/CASR/ITGB  | 5 GO  |
| GO:0043409 | negative regulation of MAPK cascade                                                  | 10/212 | 179/17913 | 5.53E-05 | 4.21E-04 | 2.18E-04 | ABL1/APOE/DUSF  | 10 GO |
| GO:0008645 | hexose transmembrane transport                                                       | 8/212  | 112/17913 | 5.59E-05 | 4.23E-04 | 2.19E-04 | GRB10/PIK3R1/PI | 8 GO  |
| GO:0030968 | endoplasmic reticulum unfolded protein response                                      | 8/212  | 112/17913 | 5.59E-05 | 4.23E-04 | 2.19E-04 | CCND1/DCTN1/EI  | 8 GO  |
| GO:0010518 | positive regulation of phospholipase activity                                        | 6/212  | 57/17913  | 5.62E-05 | 4.23E-04 | 2.19E-04 | KIT/PDGFR/PAK1  | 6 GO  |
| GO:0043525 | positive regulation of neuron apoptotic process                                      | 6/212  | 57/17913  | 5.62E-05 | 4.23E-04 | 2.19E-04 | RHOA/CASP3/JUJ  | 6 GO  |
| GO:0045453 | bone resorption                                                                      | 6/212  | 57/17913  | 5.62E-05 | 4.23E-04 | 2.19E-04 | PTK2B/INPP5D/IT | 6 GO  |
| GO:0000079 | regulation of cyclin-dependent protein serine/threonine kinase activity              | 7/212  | 83/17913  | 5.71E-05 | 4.30E-04 | 2.23E-04 | APC/CCND1/CASI  | 7 GO  |
| GO:0002758 | innate immune response-activating signal transduction                                | 13/212 | 298/17913 | 5.79E-05 | 4.35E-04 | 2.25E-04 | APOB/EP300/ITG  | 13 GO |
| GO:0050806 | positive regulation of synaptic transmission                                         | 9/212  | 145/17913 | 5.81E-05 | 4.35E-04 | 2.25E-04 | ABL1/APOE/DLG4  | 9 GO  |
| GO:0002223 | stimulatory C-type lectin receptor signaling pathway                                 | 8/212  | 113/17913 | 5.96E-05 | 4.44E-04 | 2.30E-04 | EP300/LYN/PAK1, | 8 GO  |
| GO:0014896 | muscle hypertrophy                                                                   | 8/212  | 113/17913 | 5.96E-05 | 4.44E-04 | 2.30E-04 | PARP1/IL6ST/SM, | 8 GO  |
| GO:1904375 | regulation of protein localization to cell periphery                                 | 8/212  | 113/17913 | 5.96E-05 | 4.44E-04 | 2.30E-04 | DAB2/EPHA2/LRF  | 8 GO  |
| GO:0001776 | leukocyte homeostasis                                                                | 7/212  | 84/17913  | 6.17E-05 | 4.59E-04 | 2.38E-04 | ABL1/CASP3/LYN, | 7 GO  |
| GO:0051057 | positive regulation of small GTPase mediated signal transduction                     | 6/212  | 58/17913  | 6.20E-05 | 4.61E-04 | 2.39E-04 | CRKL/LYN/PDGFR  | 6 GO  |
| GO:0015749 | monosaccharide transmembrane transport                                               | 8/212  | 114/17913 | 6.34E-05 | 4.70E-04 | 2.44E-04 | GRB10/PIK3R1/PI | 8 GO  |
| GO:0010544 | negative regulation of platelet activation                                           | 4/212  | 19/17913  | 6.43E-05 | 4.75E-04 | 2.46E-04 | APOE/F2/PDGFR/  | 4 GO  |
| GO:0023019 | signal transduction involved in regulation of gene expression                        | 4/212  | 19/17913  | 6.43E-05 | 4.75E-04 | 2.46E-04 | PARP1/SMAD2/SI  | 4 GO  |
| GO:0014910 | regulation of smooth muscle cell migration                                           | 7/212  | 85/17913  | 6.65E-05 | 4.90E-04 | 2.54E-04 | APEX1/LRP1/SERI | 7 GO  |
| GO:0071219 | cellular response to molecule of bacterial origin                                    | 10/212 | 183/17913 | 6.66E-05 | 4.90E-04 | 2.54E-04 | ABL1/RHOA/LYN/  | 10 GO |
| GO:0001941 | postsynaptic membrane organization                                                   | 5/212  | 37/17913  | 7.09E-05 | 5.19E-04 | 2.69E-04 | APOE/CRKL/DLG4  | 5 GO  |
| GO:0034405 | response to fluid shear stress                                                       | 5/212  | 37/17913  | 7.09E-05 | 5.19E-04 | 2.69E-04 | PTK2B/SMAD7/PI  | 5 GO  |
| GO:0045124 | regulation of bone resorption                                                        | 5/212  | 37/17913  | 7.09E-05 | 5.19E-04 | 2.69E-04 | INPP5D/ITGB3/PF | 5 GO  |
| GO:0062012 | regulation of small molecule metabolic process                                       | 16/212 | 439/17913 | 7.13E-05 | 5.21E-04 | 2.70E-04 | PARP1/APOB/APC  | 16 GO |
| GO:0042129 | regulation of T cell proliferation                                                   | 9/212  | 149/17913 | 7.17E-05 | 5.21E-04 | 2.70E-04 | CASP3/CD4/ERBB  | 9 GO  |
| GO:0002220 | innate immune response activating cell surface receptor signaling pathway            | 8/212  | 116/17913 | 7.17E-05 | 5.21E-04 | 2.70E-04 | EP300/LYN/PAK1, | 8 GO  |

|            |                                                                    |        |           |          |          |          |                  |    |    |
|------------|--------------------------------------------------------------------|--------|-----------|----------|----------|----------|------------------|----|----|
| GO:0034219 | carbohydrate transmembrane transport                               | 8/212  | 116/17913 | 7.17E-05 | 5.21E-04 | 2.70E-04 | GRB10/PIK3R1/PI  | 8  | GO |
| GO:0051146 | striated muscle cell differentiation                               | 12/212 | 263/17913 | 7.30E-05 | 5.28E-04 | 2.74E-04 | ACTN2/CASP3/FL   | 12 | GO |
| GO:0002703 | regulation of leukocyte mediated immunity                          | 10/212 | 185/17913 | 7.30E-05 | 5.28E-04 | 2.74E-04 | FGR/ITGB2/LYN/S  | 10 | GO |
| GO:0002697 | regulation of immune effector process                              | 16/212 | 441/17913 | 7.52E-05 | 5.43E-04 | 2.81E-04 | CD59/F2/FGR/ITC  | 16 | GO |
| GO:0002260 | lymphocyte homeostasis                                             | 6/212  | 60/17913  | 7.53E-05 | 5.43E-04 | 2.81E-04 | ABL1/CASP3/LYN,  | 6  | GO |
| GO:0060828 | regulation of canonical Wnt signaling pathway                      | 12/212 | 264/17913 | 7.56E-05 | 5.45E-04 | 2.82E-04 | APC/APOE/CTNN    | 12 | GO |
| GO:0001704 | formation of primary germ layer                                    | 8/212  | 117/17913 | 7.62E-05 | 5.47E-04 | 2.84E-04 | EPHA2/ITGB2/ITC  | 8  | GO |
| GO:0002761 | regulation of myeloid leukocyte differentiation                    | 8/212  | 117/17913 | 7.62E-05 | 5.47E-04 | 2.84E-04 | CD4/INPP5D/JUN   | 8  | GO |
| GO:1904029 | regulation of cyclin-dependent protein kinase activity             | 7/212  | 87/17913  | 7.72E-05 | 5.54E-04 | 2.87E-04 | APC/CCND1/CASI   | 7  | GO |
| GO:0009416 | response to light stimulus                                         | 13/212 | 307/17913 | 7.83E-05 | 5.60E-04 | 2.90E-04 | PARP1/CCND1/C/   | 13 | GO |
| GO:0010869 | regulation of receptor biosynthetic process                        | 4/212  | 20/17913  | 7.96E-05 | 5.66E-04 | 2.93E-04 | HDAC1/ITGB3/PP   | 4  | GO |
| GO:0030220 | platelet formation                                                 | 4/212  | 20/17913  | 7.96E-05 | 5.66E-04 | 2.93E-04 | CASP3/EP300/PTI  | 4  | GO |
| GO:0045655 | regulation of monocyte differentiation                             | 4/212  | 20/17913  | 7.96E-05 | 5.66E-04 | 2.93E-04 | CD4/INPP5D/JUN   | 4  | GO |
| GO:0046628 | positive regulation of insulin receptor signaling pathway          | 4/212  | 20/17913  | 7.96E-05 | 5.66E-04 | 2.93E-04 | PAK1/PRKCZ/PTP   | 4  | GO |
| GO:0017157 | regulation of exocytosis                                           | 10/212 | 187/17913 | 7.98E-05 | 5.66E-04 | 2.93E-04 | FGR/ITGB2/LYN/F  | 10 | GO |
| GO:0051928 | positive regulation of calcium ion transport                       | 8/212  | 119/17913 | 8.59E-05 | 6.08E-04 | 3.15E-04 | ABL1/CASR/CD4/   | 8  | GO |
| GO:0060348 | bone development                                                   | 10/212 | 189/17913 | 8.72E-05 | 6.16E-04 | 3.19E-04 | RHOA/EP300/GLI   | 10 | GO |
| GO:0033044 | regulation of chromosome organization                              | 13/212 | 311/17913 | 8.92E-05 | 6.28E-04 | 3.25E-04 | PARP1/APC/SMA    | 13 | GO |
| GO:0060070 | canonical Wnt signaling pathway                                    | 13/212 | 311/17913 | 8.92E-05 | 6.28E-04 | 3.25E-04 | APC/APOE/CTNN    | 13 | GO |
| GO:0046425 | regulation of JAK-STAT cascade                                     | 8/212  | 120/17913 | 9.11E-05 | 6.41E-04 | 3.32E-04 | F2/PTK2B/IL6ST/I | 8  | GO |
| GO:0038179 | neurotrophin signaling pathway                                     | 5/212  | 39/17913  | 9.19E-05 | 6.44E-04 | 3.34E-04 | CASP3/PTPN11/R   | 5  | GO |
| GO:0090279 | regulation of calcium ion import                                   | 5/212  | 39/17913  | 9.19E-05 | 6.44E-04 | 3.34E-04 | CASR/PDGFRB/Pt   | 5  | GO |
| GO:1904062 | regulation of cation transmembrane transport                       | 13/212 | 312/17913 | 9.21E-05 | 6.44E-04 | 3.34E-04 | ABL1/ACTN2/DLC   | 13 | GO |
| GO:0008361 | regulation of cell size                                            | 9/212  | 154/17913 | 9.25E-05 | 6.45E-04 | 3.34E-04 | ABL1/APOE/RHO,   | 9  | GO |
| GO:0035051 | cardiocyte differentiation                                         | 9/212  | 154/17913 | 9.25E-05 | 6.45E-04 | 3.34E-04 | ACTN2/SMAD4/P    | 9  | GO |
| GO:0050663 | cytokine secretion                                                 | 11/212 | 230/17913 | 9.62E-05 | 6.70E-04 | 3.47E-04 | ABL1/FGR/LRP1/I  | 11 | GO |
| GO:1903038 | negative regulation of leukocyte cell-cell adhesion                | 8/212  | 121/17913 | 9.66E-05 | 6.71E-04 | 3.48E-04 | CASP3/DUSP3/ER   | 8  | GO |
| GO:0036120 | cellular response to platelet-derived growth factor stimulus       | 4/212  | 21/17913  | 9.75E-05 | 6.75E-04 | 3.50E-04 | CBL/PDGFRB/SRC   | 4  | GO |
| GO:0036344 | platelet morphogenesis                                             | 4/212  | 21/17913  | 9.75E-05 | 6.75E-04 | 3.50E-04 | CASP3/EP300/PTI  | 4  | GO |
| GO:0043297 | apical junction assembly                                           | 6/212  | 63/17913  | 9.92E-05 | 6.85E-04 | 3.55E-04 | APC/RHOA/RHOC    | 6  | GO |
| GO:0046637 | regulation of alpha-beta T cell differentiation                    | 6/212  | 63/17913  | 9.92E-05 | 6.85E-04 | 3.55E-04 | RHOA/GLI3/SMAI   | 6  | GO |
| GO:0034248 | regulation of cellular amide metabolic process                     | 16/212 | 452/17913 | 1.00E-04 | 6.90E-04 | 3.58E-04 | APOE/RHOA/CAS    | 16 | GO |
| GO:0031647 | regulation of protein stability                                    | 12/212 | 272/17913 | 1.00E-04 | 6.91E-04 | 3.58E-04 | CASP3/EP300/SM   | 12 | GO |
| GO:0001656 | metanephros development                                            | 7/212  | 91/17913  | 1.03E-04 | 7.06E-04 | 3.66E-04 | GLI3/SMAD4/MY    | 7  | GO |
| GO:0043903 | regulation of symbiosis, encompassing mutualism through parasitism | 11/212 | 232/17913 | 1.04E-04 | 7.12E-04 | 3.69E-04 | APOE/CD4/DDX5,   | 11 | GO |
| GO:0071241 | cellular response to inorganic substance                           | 10/212 | 194/17913 | 1.08E-04 | 7.41E-04 | 3.84E-04 | PARP1/CDH1/DLC   | 10 | GO |
| GO:0034620 | cellular response to unfolded protein                              | 8/212  | 123/17913 | 1.08E-04 | 7.41E-04 | 3.84E-04 | CCND1/DCTN1/EI   | 8  | GO |
| GO:0007389 | pattern specification process                                      | 15/212 | 408/17913 | 1.09E-04 | 7.44E-04 | 3.86E-04 | CRKL/EP300/GLI3  | 15 | GO |
| GO:0043900 | regulation of multi-organism process                               | 15/212 | 408/17913 | 1.09E-04 | 7.44E-04 | 3.86E-04 | APOE/CD4/DDX5,   | 15 | GO |
| GO:2001022 | positive regulation of response to DNA damage stimulus             | 7/212  | 92/17913  | 1.10E-04 | 7.49E-04 | 3.88E-04 | PARP1/DDX5/MY    | 7  | GO |
| GO:0003158 | endothelium development                                            | 8/212  | 124/17913 | 1.15E-04 | 7.78E-04 | 4.03E-04 | RHOA/RHOB/CDI    | 8  | GO |
| GO:0002218 | activation of innate immune response                               | 13/212 | 319/17913 | 1.15E-04 | 7.79E-04 | 4.04E-04 | APOB/EP300/ITG   | 13 | GO |
| GO:0048562 | embryonic organ morphogenesis                                      | 12/212 | 276/17913 | 1.15E-04 | 7.80E-04 | 4.04E-04 | EPHA2/GLI3/SMA   | 12 | GO |
| GO:0019048 | modulation by virus of host morphology or physiology               | 5/212  | 41/17913  | 1.17E-04 | 7.92E-04 | 4.10E-04 | CD4/KPNA2/SMA    | 5  | GO |
| GO:0045621 | positive regulation of lymphocyte differentiation                  | 7/212  | 93/17913  | 1.18E-04 | 7.92E-04 | 4.10E-04 | RHOA/GLI3/INPP!  | 7  | GO |
| GO:0031639 | plasminogen activation                                             | 4/212  | 22/17913  | 1.18E-04 | 7.92E-04 | 4.10E-04 | SERPINE1/PLAT/F  | 4  | GO |
| GO:0036119 | response to platelet-derived growth factor                         | 4/212  | 22/17913  | 1.18E-04 | 7.92E-04 | 4.10E-04 | CBL/PDGFRB/SRC   | 4  | GO |
| GO:1900078 | positive regulation of cellular response to insulin stimulus       | 4/212  | 22/17913  | 1.18E-04 | 7.92E-04 | 4.10E-04 | PAK1/PRKCZ/PTP   | 4  | GO |
| GO:0072659 | protein localization to plasma membrane                            | 11/212 | 237/17913 | 1.25E-04 | 8.40E-04 | 4.35E-04 | ACTN2/CDH1/DA    | 11 | GO |

|            |                                                                                 |        |           |          |          |          |                  |       |
|------------|---------------------------------------------------------------------------------|--------|-----------|----------|----------|----------|------------------|-------|
| GO:0045778 | positive regulation of ossification                                             | 7/212  | 94/17913  | 1.26E-04 | 8.42E-04 | 4.36E-04 | GLI3/IL6ST/JUND, | 7 GO  |
| GO:0110020 | regulation of actomyosin structure organization                                 | 7/212  | 94/17913  | 1.26E-04 | 8.42E-04 | 4.36E-04 | ABL1/RHOA/RHO    | 7 GO  |
| GO:0042476 | odontogenesis                                                                   | 8/212  | 126/17913 | 1.28E-04 | 8.53E-04 | 4.42E-04 | RHOA/GLI3/HDAC   | 8 GO  |
| GO:0060359 | response to ammonium ion                                                        | 8/212  | 126/17913 | 1.28E-04 | 8.53E-04 | 4.42E-04 | ABL1/CASP3/CRK   | 8 GO  |
| GO:2000573 | positive regulation of DNA biosynthetic process                                 | 6/212  | 66/17913  | 1.29E-04 | 8.56E-04 | 4.43E-04 | PTK2B/MYC/PDG    | 6 GO  |
| GO:0006986 | response to unfolded protein                                                    | 9/212  | 161/17913 | 1.30E-04 | 8.62E-04 | 4.46E-04 | CCND1/DCTN1/EI   | 9 GO  |
| GO:0001953 | negative regulation of cell-matrix adhesion                                     | 5/212  | 42/17913  | 1.32E-04 | 8.74E-04 | 4.53E-04 | LRP1/SERPINE1/P  | 5 GO  |
| GO:0048762 | mesenchymal cell differentiation                                                | 10/212 | 199/17913 | 1.33E-04 | 8.79E-04 | 4.55E-04 | DAB2/DDX5/SMA    | 10 GO |
| GO:0050670 | regulation of lymphocyte proliferation                                          | 10/212 | 199/17913 | 1.33E-04 | 8.79E-04 | 4.55E-04 | CASP3/CD4/ERBB   | 10 GO |
| GO:0050679 | positive regulation of epithelial cell proliferation                            | 10/212 | 199/17913 | 1.33E-04 | 8.79E-04 | 4.55E-04 | CCND1/ERBB2/IT   | 10 GO |
| GO:0071229 | cellular response to acid chemical                                              | 10/212 | 199/17913 | 1.33E-04 | 8.79E-04 | 4.55E-04 | APOB/PTK2B/LDL   | 10 GO |
| GO:0031334 | positive regulation of protein complex assembly                                 | 11/212 | 239/17913 | 1.35E-04 | 8.88E-04 | 4.60E-04 | PARP1/RHOA/RH    | 11 GO |
| GO:0051100 | negative regulation of binding                                                  | 9/212  | 162/17913 | 1.36E-04 | 8.93E-04 | 4.63E-04 | DAB2/JUN/PPAR    | 9 GO  |
| GO:0032944 | regulation of mononuclear cell proliferation                                    | 10/212 | 200/17913 | 1.39E-04 | 9.11E-04 | 4.72E-04 | CASP3/CD4/ERBB   | 10 GO |
| GO:0071404 | cellular response to low-density lipoprotein particle stimulus                  | 4/212  | 23/17913  | 1.42E-04 | 9.26E-04 | 4.80E-04 | CASR/ITGB2/LDLF  | 4 GO  |
| GO:0007498 | mesoderm development                                                            | 8/212  | 128/17913 | 1.43E-04 | 9.31E-04 | 4.82E-04 | EPHA2/ITGB3/SV   | 8 GO  |
| GO:0014013 | regulation of gliogenesis                                                       | 8/212  | 128/17913 | 1.43E-04 | 9.31E-04 | 4.82E-04 | CRKL/F2/HDAC1/   | 8 GO  |
| GO:0032355 | response to estradiol                                                           | 8/212  | 128/17913 | 1.43E-04 | 9.31E-04 | 4.82E-04 | APOB/CCND1/CA    | 8 GO  |
| GO:0050707 | regulation of cytokine secretion                                                | 10/212 | 201/17913 | 1.45E-04 | 9.41E-04 | 4.88E-04 | ABL1/FGR/LRP1/I  | 10 GO |
| GO:1904892 | regulation of STAT cascade                                                      | 8/212  | 129/17913 | 1.51E-04 | 9.80E-04 | 5.07E-04 | F2/PTK2B/IL6ST/I | 8 GO  |
| GO:0046323 | glucose import                                                                  | 6/212  | 68/17913  | 1.52E-04 | 9.84E-04 | 5.10E-04 | GRB10/PIK3R1/PI  | 6 GO  |
| GO:0071674 | mononuclear cell migration                                                      | 6/212  | 68/17913  | 1.52E-04 | 9.84E-04 | 5.10E-04 | LYN/CCN3/SERPII  | 6 GO  |
| GO:0001889 | liver development                                                               | 8/212  | 130/17913 | 1.59E-04 | 1.03E-03 | 5.33E-04 | CCND1/GLI3/JUN   | 8 GO  |
| GO:0021549 | cerebellum development                                                          | 7/212  | 98/17913  | 1.64E-04 | 1.06E-03 | 5.47E-04 | ABL1/CRKL/PAK1,  | 7 GO  |
| GO:0033077 | T cell differentiation in thymus                                                | 6/212  | 69/17913  | 1.65E-04 | 1.06E-03 | 5.48E-04 | ERBB2/GLI3/RAG   | 6 GO  |
| GO:0019731 | antibacterial humoral response                                                  | 5/212  | 44/17913  | 1.65E-04 | 1.06E-03 | 5.48E-04 | KLK3/PLA2G1B/SI  | 5 GO  |
| GO:0032459 | regulation of protein oligomerization                                           | 5/212  | 44/17913  | 1.65E-04 | 1.06E-03 | 5.48E-04 | APOE/RHOC/EP3    | 5 GO  |
| GO:0048701 | embryonic cranial skeleton morphogenesis                                        | 5/212  | 44/17913  | 1.65E-04 | 1.06E-03 | 5.48E-04 | SMAD2/SMAD3/I    | 5 GO  |
| GO:1900274 | regulation of phospholipase C activity                                          | 5/212  | 44/17913  | 1.65E-04 | 1.06E-03 | 5.48E-04 | ABL1/KIT/PDGFR,  | 5 GO  |
| GO:0032800 | receptor biosynthetic process                                                   | 4/212  | 24/17913  | 1.68E-04 | 1.07E-03 | 5.57E-04 | HDAC1/ITGB3/PP   | 4 GO  |
| GO:0051495 | positive regulation of cytoskeleton organization                                | 10/212 | 205/17913 | 1.70E-04 | 1.08E-03 | 5.62E-04 | ABL1/ACTN2/RHC   | 10 GO |
| GO:0061136 | regulation of proteasomal protein catabolic process                             | 9/212  | 167/17913 | 1.71E-04 | 1.09E-03 | 5.65E-04 | APOE/ARAF/DAB.   | 9 GO  |
| GO:0046632 | alpha-beta T cell differentiation                                               | 7/212  | 99/17913  | 1.75E-04 | 1.11E-03 | 5.73E-04 | ABL1/RHOA/GLI3   | 7 GO  |
| GO:0070301 | cellular response to hydrogen peroxide                                          | 7/212  | 99/17913  | 1.75E-04 | 1.11E-03 | 5.73E-04 | ABL1/APEX1/RHC   | 7 GO  |
| GO:1902106 | negative regulation of leukocyte differentiation                                | 7/212  | 99/17913  | 1.75E-04 | 1.11E-03 | 5.73E-04 | ERBB2/GLI3/INPP  | 7 GO  |
| GO:0050715 | positive regulation of cytokine secretion                                       | 8/212  | 132/17913 | 1.77E-04 | 1.12E-03 | 5.79E-04 | ABL1/FGR/LRP1/C  | 8 GO  |
| GO:0051250 | negative regulation of lymphocyte activation                                    | 8/212  | 132/17913 | 1.77E-04 | 1.12E-03 | 5.79E-04 | CASP3/DUSP3/ER   | 8 GO  |
| GO:0006998 | nuclear envelope organization                                                   | 5/212  | 45/17913  | 1.84E-04 | 1.15E-03 | 5.98E-04 | DCTN1/PLK1/PRK   | 5 GO  |
| GO:0045058 | T cell selection                                                                | 5/212  | 45/17913  | 1.84E-04 | 1.15E-03 | 5.98E-04 | RHOA/CD4/GLI3/   | 5 GO  |
| GO:0046850 | regulation of bone remodeling                                                   | 5/212  | 45/17913  | 1.84E-04 | 1.15E-03 | 5.98E-04 | INPP5D/ITGB3/PF  | 5 GO  |
| GO:0071675 | regulation of mononuclear cell migration                                        | 5/212  | 45/17913  | 1.84E-04 | 1.15E-03 | 5.98E-04 | LYN/CCN3/SERPII  | 5 GO  |
| GO:0060439 | trachea morphogenesis                                                           | 3/212  | 10/17913  | 1.84E-04 | 1.15E-03 | 5.98E-04 | MAPK1/MAPK3/M    | 3 GO  |
| GO:1903800 | positive regulation of production of miRNAs involved in gene silencing by miRNA | 3/212  | 10/17913  | 1.84E-04 | 1.15E-03 | 5.98E-04 | DDX5/MAP2K1/T    | 3 GO  |
| GO:0097530 | granulocyte migration                                                           | 7/212  | 100/17913 | 1.86E-04 | 1.16E-03 | 6.02E-04 | ITGB2/PECAM1/P   | 7 GO  |
| GO:0061008 | hepaticobiliary system development                                              | 8/212  | 133/17913 | 1.86E-04 | 1.16E-03 | 6.03E-04 | CCND1/GLI3/JUN   | 8 GO  |
| GO:0030324 | lung development                                                                | 9/212  | 169/17913 | 1.87E-04 | 1.17E-03 | 6.05E-04 | EP300/GLI3/SMA   | 9 GO  |
| GO:0070664 | negative regulation of leukocyte proliferation                                  | 6/212  | 71/17913  | 1.93E-04 | 1.20E-03 | 6.22E-04 | CASP3/ERBB2/INI  | 6 GO  |
| GO:1903036 | positive regulation of response to wounding                                     | 6/212  | 71/17913  | 1.93E-04 | 1.20E-03 | 6.22E-04 | F2/LRP1/SERPINE  | 6 GO  |
| GO:0048771 | tissue remodeling                                                               | 9/212  | 170/17913 | 1.96E-04 | 1.21E-03 | 6.29E-04 | EPHA2/PTK2B/INI  | 9 GO  |

|            |                                                             |        |           |          |          |                          |       |
|------------|-------------------------------------------------------------|--------|-----------|----------|----------|--------------------------|-------|
| GO:0030194 | positive regulation of blood coagulation                    | 4/212  | 25/17913  | 1.98E-04 | 1.22E-03 | 6.34E-04 F2/SERPINE1/PLC | 4 GO  |
| GO:0034110 | regulation of homotypic cell-cell adhesion                  | 4/212  | 25/17913  | 1.98E-04 | 1.22E-03 | 6.34E-04 LYN/PRKCA/PRKC  | 4 GO  |
| GO:0070897 | transcription preinitiation complex assembly                | 4/212  | 25/17913  | 1.98E-04 | 1.22E-03 | 6.34E-04 TBP/TP53/UBTF/  | 4 GO  |
| GO:1900048 | positive regulation of hemostasis                           | 4/212  | 25/17913  | 1.98E-04 | 1.22E-03 | 6.34E-04 F2/SERPINE1/PLC | 4 GO  |
| GO:0071354 | cellular response to interleukin-6                          | 5/212  | 46/17913  | 2.05E-04 | 1.26E-03 | 6.53E-04 CBL/IL6ST/SMAD  | 5 GO  |
| GO:0035967 | cellular response to topologically incorrect protein        | 8/212  | 135/17913 | 2.07E-04 | 1.27E-03 | 6.58E-04 CCND1/DCTN1/EI  | 8 GO  |
| GO:0043523 | regulation of neuron apoptotic process                      | 10/212 | 210/17913 | 2.07E-04 | 1.27E-03 | 6.58E-04 PARP1/RHOA/CA   | 10 GO |
| GO:0023061 | signal release                                              | 15/212 | 433/17913 | 2.09E-04 | 1.28E-03 | 6.63E-04 CASR/LRP1/LYN/  | 15 GO |
| GO:0051017 | actin filament bundle assembly                              | 8/212  | 136/17913 | 2.17E-04 | 1.33E-03 | 6.88E-04 ABL1/RHOA/RHO   | 8 GO  |
| GO:1903305 | regulation of regulated secretory pathway                   | 8/212  | 136/17913 | 2.17E-04 | 1.33E-03 | 6.88E-04 FGR/ITGB2/LYN/F | 8 GO  |
| GO:0030323 | respiratory tube development                                | 9/212  | 173/17913 | 2.23E-04 | 1.36E-03 | 7.04E-04 EP300/GLI3/SMA  | 9 GO  |
| GO:0032091 | negative regulation of protein binding                      | 7/212  | 103/17913 | 2.23E-04 | 1.36E-03 | 7.04E-04 DAB2/PPARA/PRI  | 7 GO  |
| GO:0032526 | response to retinoic acid                                   | 7/212  | 103/17913 | 2.23E-04 | 1.36E-03 | 7.04E-04 PTK2B/LYN/PAX2  | 7 GO  |
| GO:0007492 | endoderm development                                        | 6/212  | 73/17913  | 2.25E-04 | 1.37E-03 | 7.09E-04 HDAC1/ITGB2/SN  | 6 GO  |
| GO:0046638 | positive regulation of alpha-beta T cell differentiation    | 5/212  | 47/17913  | 2.27E-04 | 1.38E-03 | 7.13E-04 RHOA/GLI3/PRKC  | 5 GO  |
| GO:0001654 | eye development                                             | 13/212 | 342/17913 | 2.28E-04 | 1.38E-03 | 7.14E-04 EPHA2/GLI3/HDA  | 13 GO |
| GO:0009411 | response to UV                                              | 8/212  | 137/17913 | 2.28E-04 | 1.38E-03 | 7.14E-04 PARP1/CCND1/C   | 8 GO  |
| GO:0061572 | actin filament bundle organization                          | 8/212  | 137/17913 | 2.28E-04 | 1.38E-03 | 7.14E-04 ABL1/RHOA/RHO   | 8 GO  |
| GO:2000058 | regulation of ubiquitin-dependent protein catabolic process | 8/212  | 137/17913 | 2.28E-04 | 1.38E-03 | 7.14E-04 ARAF/DAB2/PTK2  | 8 GO  |
| GO:0034976 | response to endoplasmic reticulum stress                    | 11/212 | 254/17913 | 2.29E-04 | 1.38E-03 | 7.16E-04 CCND1/DCTN1/EI  | 11 GO |
| GO:0050820 | positive regulation of coagulation                          | 4/212  | 26/17913  | 2.32E-04 | 1.39E-03 | 7.21E-04 F2/SERPINE1/PLC | 4 GO  |
| GO:0061437 | renal system vasculature development                        | 4/212  | 26/17913  | 2.32E-04 | 1.39E-03 | 7.21E-04 PDGFRA/PDGFRB   | 4 GO  |
| GO:0061440 | kidney vasculature development                              | 4/212  | 26/17913  | 2.32E-04 | 1.39E-03 | 7.21E-04 PDGFRA/PDGFRB   | 4 GO  |
| GO:1903579 | negative regulation of ATP metabolic process                | 4/212  | 26/17913  | 2.32E-04 | 1.39E-03 | 7.21E-04 PARP1/RHOA/PP   | 4 GO  |
| GO:0050868 | negative regulation of T cell activation                    | 7/212  | 104/17913 | 2.37E-04 | 1.42E-03 | 7.34E-04 CASP3/DUSP3/ER  | 7 GO  |
| GO:0001894 | tissue homeostasis                                          | 10/212 | 214/17913 | 2.41E-04 | 1.44E-03 | 7.45E-04 SERPINA3/PTK2B, | 10 GO |
| GO:0070373 | negative regulation of ERK1 and ERK2 cascade                | 6/212  | 74/17913  | 2.43E-04 | 1.45E-03 | 7.49E-04 ABL1/DUSP3/LYN  | 6 GO  |
| GO:0035966 | response to topologically incorrect protein                 | 9/212  | 175/17913 | 2.43E-04 | 1.45E-03 | 7.50E-04 CCND1/DCTN1/EI  | 9 GO  |
| GO:0044003 | modification by symbiont of host morphology or physiology   | 5/212  | 48/17913  | 2.51E-04 | 1.49E-03 | 7.70E-04 CD4/KPNA2/SMA   | 5 GO  |
| GO:0051972 | regulation of telomerase activity                           | 5/212  | 48/17913  | 2.51E-04 | 1.49E-03 | 7.70E-04 MYC/MAPK1/MA    | 5 GO  |
| GO:0033327 | Leydig cell differentiation                                 | 3/212  | 11/17913  | 2.51E-04 | 1.49E-03 | 7.70E-04 CCND1/PDGFRA/   | 3 GO  |
| GO:0072584 | caveolin-mediated endocytosis                               | 3/212  | 11/17913  | 2.51E-04 | 1.49E-03 | 7.70E-04 MAPK1/MAPK3/S   | 3 GO  |
| GO:1904396 | regulation of neuromuscular junction development            | 3/212  | 11/17913  | 2.51E-04 | 1.49E-03 | 7.70E-04 CRKL/DCTN1/COI  | 3 GO  |
| GO:0150063 | visual system development                                   | 13/212 | 346/17913 | 2.55E-04 | 1.50E-03 | 7.80E-04 EPHA2/GLI3/HDA  | 13 GO |
| GO:0046879 | hormone secretion                                           | 12/212 | 301/17913 | 2.57E-04 | 1.52E-03 | 7.86E-04 CASR/LRP1/LYN/  | 12 GO |
| GO:0019730 | antimicrobial humoral response                              | 7/212  | 106/17913 | 2.67E-04 | 1.57E-03 | 8.11E-04 KLK3/F2/PLA2G1I | 7 GO  |
| GO:2000278 | regulation of DNA biosynthetic process                      | 7/212  | 106/17913 | 2.67E-04 | 1.57E-03 | 8.11E-04 PTK2B/MYC/PDG   | 7 GO  |
| GO:0043921 | modulation by host of viral transcription                   | 4/212  | 27/17913  | 2.70E-04 | 1.58E-03 | 8.20E-04 EP300/HDAC1/JU  | 4 GO  |
| GO:0052472 | modulation by host of symbiont transcription                | 4/212  | 27/17913  | 2.70E-04 | 1.58E-03 | 8.20E-04 EP300/HDAC1/JU  | 4 GO  |
| GO:0045807 | positive regulation of endocytosis                          | 8/212  | 141/17913 | 2.78E-04 | 1.63E-03 | 8.42E-04 APOE/CBL/DAB2/  | 8 GO  |
| GO:0014015 | positive regulation of gliogenesis                          | 6/212  | 76/17913  | 2.81E-04 | 1.64E-03 | 8.50E-04 CRKL/HDAC1/IL6  | 6 GO  |
| GO:0022037 | metencephalon development                                   | 7/212  | 107/17913 | 2.82E-04 | 1.65E-03 | 8.53E-04 ABL1/CRKL/PAK1, | 7 GO  |
| GO:2001233 | regulation of apoptotic signaling pathway                   | 14/212 | 397/17913 | 2.84E-04 | 1.65E-03 | 8.56E-04 PARP1/CD44/HD   | 14 GO |
| GO:0035265 | organ growth                                                | 9/212  | 179/17913 | 2.88E-04 | 1.67E-03 | 8.66E-04 SMAD1/SMAD2/I   | 9 GO  |
| GO:0072006 | nephron development                                         | 8/212  | 142/17913 | 2.92E-04 | 1.69E-03 | 8.77E-04 GLI3/SMAD4/MY   | 8 GO  |
| GO:0048880 | sensory system development                                  | 13/212 | 351/17913 | 2.93E-04 | 1.70E-03 | 8.80E-04 EPHA2/GLI3/HDA  | 13 GO |
| GO:0032271 | regulation of protein polymerization                        | 9/212  | 180/17913 | 3.00E-04 | 1.73E-03 | 8.98E-04 ABL1/RHOA/DCTI  | 9 GO  |
| GO:0043902 | positive regulation of multi-organism process               | 9/212  | 180/17913 | 3.00E-04 | 1.73E-03 | 8.98E-04 APOE/CD4/EP30C  | 9 GO  |
| GO:0034644 | cellular response to UV                                     | 6/212  | 77/17913  | 3.02E-04 | 1.74E-03 | 9.03E-04 PARP1/EP300/M   | 6 GO  |

|            |                                                                                      |        |           |          |          |          |                  |       |
|------------|--------------------------------------------------------------------------------------|--------|-----------|----------|----------|----------|------------------|-------|
| GO:0070741 | response to interleukin-6                                                            | 5/212  | 50/17913  | 3.04E-04 | 1.76E-03 | 9.09E-04 | CBL/IL6ST/SMAD4  | 5 GO  |
| GO:0048738 | cardiac muscle tissue development                                                    | 10/212 | 221/17913 | 3.11E-04 | 1.78E-03 | 9.22E-04 | ACTN2/SMAD1/S    | 10 GO |
| GO:0000002 | mitochondrial genome maintenance                                                     | 4/212  | 28/17913  | 3.12E-04 | 1.78E-03 | 9.22E-04 | PARP1/TP53/DNAH  | 4 GO  |
| GO:0030511 | positive regulation of transforming growth factor beta receptor signaling pathway    | 4/212  | 28/17913  | 3.12E-04 | 1.78E-03 | 9.22E-04 | DAB2/EP300/SMAD  | 4 GO  |
| GO:0033688 | regulation of osteoblast proliferation                                               | 4/212  | 28/17913  | 3.12E-04 | 1.78E-03 | 9.22E-04 | ABL1/RHOA/SMAD   | 4 GO  |
| GO:0044030 | regulation of DNA methylation                                                        | 4/212  | 28/17913  | 3.12E-04 | 1.78E-03 | 9.22E-04 | PARP1/MYC/SPI1   | 4 GO  |
| GO:0052312 | modulation of transcription in other organism involved in symbiotic interaction      | 4/212  | 28/17913  | 3.12E-04 | 1.78E-03 | 9.22E-04 | EP300/HDAC1/JUN  | 4 GO  |
| GO:0060765 | regulation of androgen receptor signaling pathway                                    | 4/212  | 28/17913  | 3.12E-04 | 1.78E-03 | 9.22E-04 | DAB2/DDX5/EP300  | 4 GO  |
| GO:1900543 | negative regulation of purine nucleotide metabolic process                           | 4/212  | 28/17913  | 3.12E-04 | 1.78E-03 | 9.22E-04 | PARP1/RHOA/PP2A  | 4 GO  |
| GO:1903846 | positive regulation of cellular response to transforming growth factor beta stimulus | 4/212  | 28/17913  | 3.12E-04 | 1.78E-03 | 9.22E-04 | DAB2/EP300/SMAD  | 4 GO  |
| GO:1903052 | positive regulation of proteolysis involved in cellular protein catabolic process    | 7/212  | 109/17913 | 3.16E-04 | 1.80E-03 | 9.32E-04 | DAB2/PTK2B/SMAD  | 7 GO  |
| GO:0055013 | cardiac muscle cell development                                                      | 6/212  | 78/17913  | 3.24E-04 | 1.84E-03 | 9.52E-04 | ACTN2/SMAD4/PP   | 6 GO  |
| GO:0010976 | positive regulation of neuron projection development                                 | 11/212 | 265/17913 | 3.30E-04 | 1.87E-03 | 9.68E-04 | APOE/RHOA/DLG    | 11 GO |
| GO:0007077 | mitotic nuclear envelope disassembly                                                 | 3/212  | 12/17913  | 3.32E-04 | 1.87E-03 | 9.68E-04 | PLK1/PRKCA/PRK   | 3 GO  |
| GO:0035641 | locomotory exploration behavior                                                      | 3/212  | 12/17913  | 3.32E-04 | 1.87E-03 | 9.68E-04 | APOE/DLG4/PRK    | 3 GO  |
| GO:0038110 | interleukin-2-mediated signaling pathway                                             | 3/212  | 12/17913  | 3.32E-04 | 1.87E-03 | 9.68E-04 | PTK2B/SHC1/SYK   | 3 GO  |
| GO:0060391 | positive regulation of SMAD protein signal transduction                              | 3/212  | 12/17913  | 3.32E-04 | 1.87E-03 | 9.68E-04 | PARP1/DAB2/SMAD  | 3 GO  |
| GO:0071340 | skeletal muscle acetylcholine-gated channel clustering                               | 3/212  | 12/17913  | 3.32E-04 | 1.87E-03 | 9.68E-04 | CRKL/COLQ/DNAH   | 3 GO  |
| GO:0001954 | positive regulation of cell-matrix adhesion                                          | 5/212  | 51/17913  | 3.34E-04 | 1.87E-03 | 9.68E-04 | ABL1/PTK2B/JUP   | 5 GO  |
| GO:0030239 | myofibril assembly                                                                   | 5/212  | 51/17913  | 3.34E-04 | 1.87E-03 | 9.68E-04 | ACTN2/SMAD4/PP   | 5 GO  |
| GO:0046579 | positive regulation of Ras protein signal transduction                               | 5/212  | 51/17913  | 3.34E-04 | 1.87E-03 | 9.68E-04 | CRKL/LYN/PDGFR   | 5 GO  |
| GO:0048146 | positive regulation of fibroblast proliferation                                      | 5/212  | 51/17913  | 3.34E-04 | 1.87E-03 | 9.68E-04 | JUN/MYC/PDGFR    | 5 GO  |
| GO:0051496 | positive regulation of stress fiber assembly                                         | 5/212  | 51/17913  | 3.34E-04 | 1.87E-03 | 9.68E-04 | ABL1/RHOA/RHO    | 5 GO  |
| GO:0010811 | positive regulation of cell-substrate adhesion                                       | 7/212  | 110/17913 | 3.34E-04 | 1.87E-03 | 9.68E-04 | ABL1/CRKL/PTK2I  | 7 GO  |
| GO:0002262 | myeloid cell homeostasis                                                             | 8/212  | 145/17913 | 3.36E-04 | 1.87E-03 | 9.68E-04 | CASP3/INPP5D/KI  | 8 GO  |
| GO:0055002 | striated muscle cell development                                                     | 8/212  | 145/17913 | 3.36E-04 | 1.87E-03 | 9.68E-04 | ACTN2/FLNC/SMAD  | 8 GO  |
| GO:0071774 | response to fibroblast growth factor                                                 | 8/212  | 145/17913 | 3.36E-04 | 1.87E-03 | 9.68E-04 | CASR/CBL/CD44/PP | 8 GO  |
| GO:0034765 | regulation of ion transmembrane transport                                            | 15/212 | 453/17913 | 3.38E-04 | 1.88E-03 | 9.73E-04 | ABL1/ACTN2/DLG   | 15 GO |
| GO:0043270 | positive regulation of ion transport                                                 | 11/212 | 266/17913 | 3.41E-04 | 1.89E-03 | 9.79E-04 | ABL1/ACTN2/APC   | 11 GO |
| GO:0009914 | hormone transport                                                                    | 12/212 | 311/17913 | 3.46E-04 | 1.92E-03 | 9.93E-04 | CASR/LRP1/LYN/PP | 12 GO |
| GO:0021766 | hippocampus development                                                              | 6/212  | 79/17913  | 3.47E-04 | 1.92E-03 | 9.93E-04 | CASP3/CRKL/GLI3  | 6 GO  |
| GO:0072028 | nephron morphogenesis                                                                | 6/212  | 79/17913  | 3.47E-04 | 1.92E-03 | 9.93E-04 | GLI3/SMAD4/MYC   | 6 GO  |
| GO:0021602 | cranial nerve morphogenesis                                                          | 4/212  | 29/17913  | 3.59E-04 | 1.98E-03 | 1.03E-03 | GLI3/KCNA2/PAX   | 4 GO  |
| GO:0045980 | negative regulation of nucleotide metabolic process                                  | 4/212  | 29/17913  | 3.59E-04 | 1.98E-03 | 1.03E-03 | PARP1/RHOA/PP2A  | 4 GO  |
| GO:0043536 | positive regulation of blood vessel endothelial cell migration                       | 6/212  | 80/17913  | 3.71E-04 | 2.04E-03 | 1.06E-03 | ABL1/PLCG1/PRK   | 6 GO  |
| GO:0019932 | second-messenger-mediated signaling                                                  | 13/212 | 360/17913 | 3.73E-04 | 2.05E-03 | 1.06E-03 | APOE/CD4/PTK2E   | 13 GO |
| GO:0030218 | erythrocyte differentiation                                                          | 7/212  | 112/17913 | 3.73E-04 | 2.05E-03 | 1.06E-03 | CASP3/INPP5D/KI  | 7 GO  |
| GO:0042157 | lipoprotein metabolic process                                                        | 7/212  | 112/17913 | 3.73E-04 | 2.05E-03 | 1.06E-03 | APOB/APOE/ITGE   | 7 GO  |
| GO:0008643 | carbohydrate transport                                                               | 8/212  | 148/17913 | 3.85E-04 | 2.11E-03 | 1.09E-03 | GRB10/PIK3R1/PI  | 8 GO  |
| GO:0050770 | regulation of axonogenesis                                                           | 8/212  | 148/17913 | 3.85E-04 | 2.11E-03 | 1.09E-03 | ABL1/APOE/RHOA   | 8 GO  |
| GO:0030510 | regulation of BMP signaling pathway                                                  | 6/212  | 81/17913  | 3.97E-04 | 2.17E-03 | 1.12E-03 | ABL1/SMAD2/SMAD  | 6 GO  |
| GO:0051899 | membrane depolarization                                                              | 6/212  | 81/17913  | 3.97E-04 | 2.17E-03 | 1.12E-03 | ABL1/PARP1/JUN   | 6 GO  |
| GO:0015850 | organic hydroxy compound transport                                                   | 10/212 | 228/17913 | 3.99E-04 | 2.17E-03 | 1.12E-03 | APOB/APOE/KCN    | 10 GO |
| GO:0060325 | face morphogenesis                                                                   | 4/212  | 30/17913  | 4.11E-04 | 2.23E-03 | 1.15E-03 | EP300/PDGFR/P    | 4 GO  |
| GO:0090314 | positive regulation of protein targeting to membrane                                 | 4/212  | 30/17913  | 4.11E-04 | 2.23E-03 | 1.15E-03 | ERBB2/ITGB2/PAL  | 4 GO  |
| GO:1902991 | regulation of amyloid precursor protein catabolic process                            | 4/212  | 30/17913  | 4.11E-04 | 2.23E-03 | 1.15E-03 | APOE/CASP3/LYN   | 4 GO  |
| GO:0019722 | calcium-mediated signaling                                                           | 9/212  | 188/17913 | 4.12E-04 | 2.23E-03 | 1.16E-03 | CD4/PTK2B/PKD2   | 9 GO  |
| GO:0030902 | hindbrain development                                                                | 8/212  | 150/17913 | 4.22E-04 | 2.28E-03 | 1.18E-03 | ABL1/CRKL/SMAD   | 8 GO  |
| GO:0010745 | negative regulation of macrophage derived foam cell differentiation                  | 3/212  | 13/17913  | 4.28E-04 | 2.29E-03 | 1.19E-03 | ITGB3/PPARA/NR   | 3 GO  |

|            |                                                                                                 |        |           |          |          |          |                 |       |
|------------|-------------------------------------------------------------------------------------------------|--------|-----------|----------|----------|----------|-----------------|-------|
| GO:0010763 | positive regulation of fibroblast migration                                                     | 3/212  | 13/17913  | 4.28E-04 | 2.29E-03 | 1.19E-03 | PAK1/PRKCE/THB  | 3 GO  |
| GO:0021554 | optic nerve development                                                                         | 3/212  | 13/17913  | 4.28E-04 | 2.29E-03 | 1.19E-03 | GLI3/KCNA2/PAX  | 3 GO  |
| GO:0034374 | low-density lipoprotein particle remodeling                                                     | 3/212  | 13/17913  | 4.28E-04 | 2.29E-03 | 1.19E-03 | APOB/APOE/PLA:  | 3 GO  |
| GO:0060397 | JAK-STAT cascade involved in growth hormone signaling pathway                                   | 3/212  | 13/17913  | 4.28E-04 | 2.29E-03 | 1.19E-03 | LYN/PRLR/PTPN1  | 3 GO  |
| GO:0061029 | eyelid development in camera-type eye                                                           | 3/212  | 13/17913  | 4.28E-04 | 2.29E-03 | 1.19E-03 | HDAC1/JUN/TFAF  | 3 GO  |
| GO:0071352 | cellular response to interleukin-2                                                              | 3/212  | 13/17913  | 4.28E-04 | 2.29E-03 | 1.19E-03 | PTK2B/SHC1/SYK  | 3 GO  |
| GO:1900272 | negative regulation of long-term synaptic potentiation                                          | 3/212  | 13/17913  | 4.28E-04 | 2.29E-03 | 1.19E-03 | ABL1/APOE/PRNF  | 3 GO  |
| GO:0001890 | placenta development                                                                            | 8/212  | 151/17913 | 4.41E-04 | 2.36E-03 | 1.22E-03 | PKD2/MAPK1/M/   | 8 GO  |
| GO:0006352 | DNA-templated transcription, initiation                                                         | 10/212 | 231/17913 | 4.42E-04 | 2.36E-03 | 1.22E-03 | CCND1/JUN/PPAI  | 10 GO |
| GO:0071496 | cellular response to external stimulus                                                          | 12/212 | 320/17913 | 4.47E-04 | 2.38E-03 | 1.24E-03 | CASR/CBL/JUN/LI | 12 GO |
| GO:0045582 | positive regulation of T cell differentiation                                                   | 6/212  | 83/17913  | 4.53E-04 | 2.41E-03 | 1.25E-03 | RHOA/GLI3/PRKC  | 6 GO  |
| GO:0051492 | regulation of stress fiber assembly                                                             | 6/212  | 83/17913  | 4.53E-04 | 2.41E-03 | 1.25E-03 | ABL1/RHOA/RHO   | 6 GO  |
| GO:1903707 | negative regulation of hemopoiesis                                                              | 8/212  | 152/17913 | 4.61E-04 | 2.44E-03 | 1.27E-03 | ERBB2/PTK2B/GL  | 8 GO  |
| GO:1990845 | adaptive thermogenesis                                                                          | 8/212  | 152/17913 | 4.61E-04 | 2.44E-03 | 1.27E-03 | APC/GRB10/PRLR  | 8 GO  |
| GO:0007569 | cell aging                                                                                      | 7/212  | 116/17913 | 4.62E-04 | 2.45E-03 | 1.27E-03 | ABL1/SERPINE1/F | 7 GO  |
| GO:1901654 | response to ketone                                                                              | 9/212  | 191/17913 | 4.63E-04 | 2.45E-03 | 1.27E-03 | PARP1/CCND1/CI  | 9 GO  |
| GO:0033687 | osteoblast proliferation                                                                        | 4/212  | 31/17913  | 4.67E-04 | 2.46E-03 | 1.28E-03 | ABL1/RHOA/SMA   | 4 GO  |
| GO:0070570 | regulation of neuron projection regeneration                                                    | 4/212  | 31/17913  | 4.67E-04 | 2.46E-03 | 1.28E-03 | LRP1/PRRX1/MAI  | 4 GO  |
| GO:0010332 | response to gamma radiation                                                                     | 5/212  | 55/17913  | 4.76E-04 | 2.50E-03 | 1.30E-03 | PARP1/CBL/MYC/  | 5 GO  |
| GO:0031102 | neuron projection regeneration                                                                  | 5/212  | 55/17913  | 4.76E-04 | 2.50E-03 | 1.30E-03 | JUN/LRP1/PRRX1  | 5 GO  |
| GO:0031663 | lipopolysaccharide-mediated signaling pathway                                                   | 5/212  | 55/17913  | 4.76E-04 | 2.50E-03 | 1.30E-03 | LYN/PRKCA/PRKC  | 5 GO  |
| GO:0071897 | DNA biosynthetic process                                                                        | 9/212  | 192/17913 | 4.80E-04 | 2.52E-03 | 1.31E-03 | PTK2B/MYC/PCN,  | 9 GO  |
| GO:0055006 | cardiac cell development                                                                        | 6/212  | 84/17913  | 4.83E-04 | 2.53E-03 | 1.31E-03 | ACTN2/SMAD4/P   | 6 GO  |
| GO:0071621 | granulocyte chemotaxis                                                                          | 6/212  | 84/17913  | 4.83E-04 | 2.53E-03 | 1.31E-03 | ITGB2/PLA2G1B/I | 6 GO  |
| GO:0090100 | positive regulation of transmembrane receptor protein serine/threonine kinase signaling pathway | 6/212  | 84/17913  | 4.83E-04 | 2.53E-03 | 1.31E-03 | PARP1/DAB2/EP3  | 6 GO  |
| GO:0034605 | cellular response to heat                                                                       | 7/212  | 117/17913 | 4.86E-04 | 2.54E-03 | 1.32E-03 | EP300/LYN/PRKA  | 7 GO  |
| GO:0051346 | negative regulation of hydrolase activity                                                       | 14/212 | 420/17913 | 4.98E-04 | 2.60E-03 | 1.35E-03 | ABL1/CD44/PEBP  | 14 GO |
| GO:0060541 | respiratory system development                                                                  | 9/212  | 193/17913 | 4.99E-04 | 2.60E-03 | 1.35E-03 | EP300/GLI3/SMA  | 9 GO  |
| GO:0000723 | telomere maintenance                                                                            | 8/212  | 154/17913 | 5.03E-04 | 2.61E-03 | 1.35E-03 | PARP1/APEX1/M'  | 8 GO  |
| GO:0045931 | positive regulation of mitotic cell cycle                                                       | 8/212  | 154/17913 | 5.03E-04 | 2.61E-03 | 1.35E-03 | ABL1/APEX1/CCN  | 8 GO  |
| GO:0048704 | embryonic skeletal system morphogenesis                                                         | 6/212  | 85/17913  | 5.15E-04 | 2.67E-03 | 1.38E-03 | GLI3/SMAD2/SM,  | 6 GO  |
| GO:0060674 | placenta blood vessel development                                                               | 4/212  | 32/17913  | 5.29E-04 | 2.74E-03 | 1.42E-03 | PKD2/MAPK1/M/   | 4 GO  |
| GO:0010885 | regulation of cholesterol storage                                                               | 3/212  | 14/17913  | 5.40E-04 | 2.78E-03 | 1.44E-03 | APOB/PPARA/NR   | 3 GO  |
| GO:0051123 | RNA polymerase II preinitiation complex assembly                                                | 3/212  | 14/17913  | 5.40E-04 | 2.78E-03 | 1.44E-03 | TBP/TP53/ATF7IP | 3 GO  |
| GO:0070669 | response to interleukin-2                                                                       | 3/212  | 14/17913  | 5.40E-04 | 2.78E-03 | 1.44E-03 | PTK2B/SHC1/SYK  | 3 GO  |
| GO:0072216 | positive regulation of metanephros development                                                  | 3/212  | 14/17913  | 5.40E-04 | 2.78E-03 | 1.44E-03 | MYC/PAX2/PDGF   | 3 GO  |
| GO:1903351 | cellular response to dopamine                                                                   | 3/212  | 14/17913  | 5.40E-04 | 2.78E-03 | 1.44E-03 | ABL1/MAPK1/MA   | 3 GO  |
| GO:0034103 | regulation of tissue remodeling                                                                 | 6/212  | 86/17913  | 5.48E-04 | 2.81E-03 | 1.45E-03 | INPP5D/ITGB3/PF | 6 GO  |
| GO:0034446 | substrate adhesion-dependent cell spreading                                                     | 6/212  | 86/17913  | 5.48E-04 | 2.81E-03 | 1.45E-03 | ABL1/CRKL/ITGB3 | 6 GO  |
| GO:0048145 | regulation of fibroblast proliferation                                                          | 6/212  | 86/17913  | 5.48E-04 | 2.81E-03 | 1.45E-03 | JUN/MYC/PDGFR   | 6 GO  |
| GO:0061097 | regulation of protein tyrosine kinase activity                                                  | 6/212  | 86/17913  | 5.48E-04 | 2.81E-03 | 1.45E-03 | DLG4/PRNP/PTPN  | 6 GO  |
| GO:0046686 | response to cadmium ion                                                                         | 5/212  | 57/17913  | 5.62E-04 | 2.88E-03 | 1.49E-03 | JUN/KIT/PCNA/M  | 5 GO  |
| GO:0034101 | erythrocyte homeostasis                                                                         | 7/212  | 120/17913 | 5.66E-04 | 2.89E-03 | 1.50E-03 | CASP3/INPP5D/KI | 7 GO  |
| GO:0090068 | positive regulation of cell cycle process                                                       | 11/212 | 283/17913 | 5.73E-04 | 2.92E-03 | 1.52E-03 | APEX1/RHOA/CCI  | 11 GO |
| GO:0048144 | fibroblast proliferation                                                                        | 6/212  | 87/17913  | 5.83E-04 | 2.97E-03 | 1.54E-03 | JUN/MYC/PDGFR   | 6 GO  |
| GO:0060021 | roof of mouth development                                                                       | 6/212  | 87/17913  | 5.83E-04 | 2.97E-03 | 1.54E-03 | GLI3/SMAD2/SM,  | 6 GO  |
| GO:0055007 | cardiac muscle cell differentiation                                                             | 7/212  | 121/17913 | 5.95E-04 | 3.01E-03 | 1.56E-03 | ACTN2/SMAD4/P   | 7 GO  |
| GO:0002244 | hematopoietic progenitor cell differentiation                                                   | 8/212  | 158/17913 | 5.95E-04 | 3.01E-03 | 1.56E-03 | ABL1/KIT/OSM/EI | 8 GO  |
| GO:0009408 | response to heat                                                                                | 8/212  | 158/17913 | 5.95E-04 | 3.01E-03 | 1.56E-03 | EP300/LYN/PRKA  | 8 GO  |



|            |                                                                                  |        |           |          |          |          |                 |       |
|------------|----------------------------------------------------------------------------------|--------|-----------|----------|----------|----------|-----------------|-------|
| GO:0030947 | regulation of vascular endothelial growth factor receptor signaling pathway      | 4/212  | 33/17913  | 5.96E-04 | 3.01E-03 | 1.56E-03 | GRB10/ITGB3/PR  | 4 GO  |
| GO:0045736 | negative regulation of cyclin-dependent protein serine/threonine kinase activity | 4/212  | 33/17913  | 5.96E-04 | 3.01E-03 | 1.56E-03 | APC/CASP3/PLK1, | 4 GO  |
| GO:0048011 | neurotrophin TRK receptor signaling pathway                                      | 4/212  | 33/17913  | 5.96E-04 | 3.01E-03 | 1.56E-03 | CASP3/PTPN11/S  | 4 GO  |
| GO:0098751 | bone cell development                                                            | 4/212  | 33/17913  | 5.96E-04 | 3.01E-03 | 1.56E-03 | EP300/KIT/PTPNE | 4 GO  |
| GO:0002699 | positive regulation of immune effector process                                   | 9/212  | 198/17913 | 6.00E-04 | 3.02E-03 | 1.57E-03 | FGR/ITGB2/LYN/F | 9 GO  |
| GO:0030178 | negative regulation of Wnt signaling pathway                                     | 9/212  | 198/17913 | 6.00E-04 | 3.02E-03 | 1.57E-03 | APC/APOE/CTNN   | 9 GO  |
| GO:0032233 | positive regulation of actin filament bundle assembly                            | 5/212  | 58/17913  | 6.10E-04 | 3.07E-03 | 1.59E-03 | ABL1/RHOA/RHO   | 5 GO  |
| GO:0097237 | cellular response to toxic substance                                             | 10/212 | 241/17913 | 6.15E-04 | 3.09E-03 | 1.60E-03 | ABL1/APEX1/APC  | 10 GO |
| GO:0007266 | Rho protein signal transduction                                                  | 8/212  | 159/17913 | 6.21E-04 | 3.11E-03 | 1.61E-03 | ABL1/APOE/RHO,  | 8 GO  |
| GO:0046488 | phosphatidylinositol metabolic process                                           | 8/212  | 159/17913 | 6.21E-04 | 3.11E-03 | 1.61E-03 | INPP5D/PDGFRB/  | 8 GO  |
| GO:0055001 | muscle cell development                                                          | 8/212  | 159/17913 | 6.21E-04 | 3.11E-03 | 1.61E-03 | ACTN2/FLNC/SM,  | 8 GO  |
| GO:0034763 | negative regulation of transmembrane transport                                   | 7/212  | 122/17913 | 6.25E-04 | 3.13E-03 | 1.62E-03 | ACTN2/GRB10/Pt  | 7 GO  |
| GO:0007254 | JNK cascade                                                                      | 9/212  | 200/17913 | 6.45E-04 | 3.22E-03 | 1.67E-03 | CASR/CRKL/DUSP  | 9 GO  |
| GO:0061448 | connective tissue development                                                    | 10/212 | 243/17913 | 6.55E-04 | 3.27E-03 | 1.69E-03 | CASR/CD44/GLI3, | 10 GO |
| GO:0044728 | DNA methylation or demethylation                                                 | 6/212  | 89/17913  | 6.58E-04 | 3.28E-03 | 1.70E-03 | PARP1/APEX1/M'  | 6 GO  |
| GO:0090303 | positive regulation of wound healing                                             | 5/212  | 59/17913  | 6.60E-04 | 3.28E-03 | 1.70E-03 | F2/SERPINE1/PLC | 5 GO  |
| GO:0032486 | Rap protein signal transduction                                                  | 3/212  | 15/17913  | 6.69E-04 | 3.30E-03 | 1.71E-03 | CBL/RAP1A/RAP2  | 3 GO  |
| GO:1903350 | response to dopamine                                                             | 3/212  | 15/17913  | 6.69E-04 | 3.30E-03 | 1.71E-03 | ABL1/MAPK1/MA   | 3 GO  |
| GO:1903358 | regulation of Golgi organization                                                 | 3/212  | 15/17913  | 6.69E-04 | 3.30E-03 | 1.71E-03 | MAPK1/MAPK3/M   | 3 GO  |
| GO:0034142 | toll-like receptor 4 signaling pathway                                           | 4/212  | 34/17913  | 6.70E-04 | 3.30E-03 | 1.71E-03 | ITGB2/LYN/PRKCI | 4 GO  |
| GO:0071868 | cellular response to monoamine stimulus                                          | 4/212  | 34/17913  | 6.70E-04 | 3.30E-03 | 1.71E-03 | ABL1/PRKACA/M,  | 4 GO  |
| GO:0071870 | cellular response to catecholamine stimulus                                      | 4/212  | 34/17913  | 6.70E-04 | 3.30E-03 | 1.71E-03 | ABL1/PRKACA/M,  | 4 GO  |
| GO:1904030 | negative regulation of cyclin-dependent protein kinase activity                  | 4/212  | 34/17913  | 6.70E-04 | 3.30E-03 | 1.71E-03 | APC/CASP3/PLK1, | 4 GO  |
| GO:2000249 | regulation of actin cytoskeleton reorganization                                  | 4/212  | 34/17913  | 6.70E-04 | 3.30E-03 | 1.71E-03 | ABL1/PTK2B/PDG  | 4 GO  |
| GO:0016569 | covalent chromatin modification                                                  | 14/212 | 433/17913 | 6.72E-04 | 3.31E-03 | 1.71E-03 | EP300/HDAC1/SA  | 14 GO |
| GO:0015908 | fatty acid transport                                                             | 6/212  | 90/17913  | 6.98E-04 | 3.42E-03 | 1.77E-03 | APOE/PLA2G1B/F  | 6 GO  |
| GO:0046634 | regulation of alpha-beta T cell activation                                       | 6/212  | 90/17913  | 6.98E-04 | 3.42E-03 | 1.77E-03 | RHOA/GLI3/SMAI  | 6 GO  |
| GO:0050764 | regulation of phagocytosis                                                       | 6/212  | 90/17913  | 6.98E-04 | 3.42E-03 | 1.77E-03 | FGR/LRP1/PRKCG  | 6 GO  |
| GO:0046486 | glycerolipid metabolic process                                                   | 13/212 | 385/17913 | 7.00E-04 | 3.43E-03 | 1.78E-03 | APOB/APOE/INPF  | 13 GO |
| GO:0001658 | branching involved in ureteric bud morphogenesis                                 | 5/212  | 60/17913  | 7.13E-04 | 3.48E-03 | 1.80E-03 | GLI3/SMAD4/MYI  | 5 GO  |
| GO:0009880 | embryonic pattern specification                                                  | 5/212  | 60/17913  | 7.13E-04 | 3.48E-03 | 1.80E-03 | SMAD1/SMAD2/S   | 5 GO  |
| GO:0046324 | regulation of glucose import                                                     | 5/212  | 60/17913  | 7.13E-04 | 3.48E-03 | 1.80E-03 | GRB10/PIK3R1/PI | 5 GO  |
| GO:1905953 | negative regulation of lipid localization                                        | 5/212  | 60/17913  | 7.13E-04 | 3.48E-03 | 1.80E-03 | ITGB3/PPARA/PTI | 5 GO  |
| GO:2001242 | regulation of intrinsic apoptotic signaling pathway                              | 8/212  | 163/17913 | 7.31E-04 | 3.56E-03 | 1.84E-03 | PARP1/CD44/HD/  | 8 GO  |
| GO:0010717 | regulation of epithelial to mesenchymal transition                               | 6/212  | 91/17913  | 7.40E-04 | 3.59E-03 | 1.86E-03 | DAB2/SMAD2/SM   | 6 GO  |
| GO:1901184 | regulation of ERBB signaling pathway                                             | 6/212  | 91/17913  | 7.40E-04 | 3.59E-03 | 1.86E-03 | CBL/DUSP3/ERBB  | 6 GO  |
| GO:0001893 | maternal placenta development                                                    | 4/212  | 35/17913  | 7.49E-04 | 3.62E-03 | 1.88E-03 | MAPK1/MAPK3/F   | 4 GO  |
| GO:0030224 | monocyte differentiation                                                         | 4/212  | 35/17913  | 7.49E-04 | 3.62E-03 | 1.88E-03 | CD4/INPP5D/JUN  | 4 GO  |
| GO:0060323 | head morphogenesis                                                               | 4/212  | 35/17913  | 7.49E-04 | 3.62E-03 | 1.88E-03 | EP300/PDGFR/PT  | 4 GO  |
| GO:1903131 | mononuclear cell differentiation                                                 | 4/212  | 35/17913  | 7.49E-04 | 3.62E-03 | 1.88E-03 | CD4/INPP5D/JUN  | 4 GO  |
| GO:0051592 | response to calcium ion                                                          | 7/212  | 126/17913 | 7.57E-04 | 3.66E-03 | 1.89E-03 | CCND1/CASR/PTK  | 7 GO  |
| GO:0070588 | calcium ion transmembrane transport                                              | 11/212 | 293/17913 | 7.63E-04 | 3.68E-03 | 1.91E-03 | ABL1/F2/PTK2B/L | 11 GO |
| GO:0030032 | lamellipodium assembly                                                           | 5/212  | 61/17913  | 7.69E-04 | 3.70E-03 | 1.92E-03 | EPHA2/KIT/VAV2, | 5 GO  |
| GO:0046635 | positive regulation of alpha-beta T cell activation                              | 5/212  | 61/17913  | 7.69E-04 | 3.70E-03 | 1.92E-03 | RHOA/GLI3/PRKC  | 5 GO  |
| GO:0048645 | animal organ formation                                                           | 5/212  | 61/17913  | 7.69E-04 | 3.70E-03 | 1.92E-03 | GLI3/PAX2/MAPK  | 5 GO  |
| GO:0090596 | sensory organ morphogenesis                                                      | 10/212 | 250/17913 | 8.15E-04 | 3.89E-03 | 2.02E-03 | EPHA2/GLI3/HDA  | 10 GO |
| GO:2000027 | regulation of animal organ morphogenesis                                         | 10/212 | 250/17913 | 8.15E-04 | 3.89E-03 | 2.02E-03 | ABL1/RHOA/DAB   | 10 GO |
| GO:0010875 | positive regulation of cholesterol efflux                                        | 3/212  | 16/17913  | 8.17E-04 | 3.89E-03 | 2.02E-03 | APOE/LRP1/NR1F  | 3 GO  |
| GO:0010878 | cholesterol storage                                                              | 3/212  | 16/17913  | 8.17E-04 | 3.89E-03 | 2.02E-03 | APOB/PPARA/NR   | 3 GO  |



|            |                                                            |        |           |          |          |          |                 |       |
|------------|------------------------------------------------------------|--------|-----------|----------|----------|----------|-----------------|-------|
| GO:0070242 | thymocyte apoptotic process                                | 3/212  | 16/17913  | 8.17E-04 | 3.89E-03 | 2.02E-03 | GLI3/RAG1/TP53  | 3 GO  |
| GO:0072224 | metanephric glomerulus development                         | 3/212  | 16/17913  | 8.17E-04 | 3.89E-03 | 2.02E-03 | PAX2/PDGFR/PTEN | 3 GO  |
| GO:1900221 | regulation of amyloid-beta clearance                       | 3/212  | 16/17913  | 8.17E-04 | 3.89E-03 | 2.02E-03 | APOE/HDAC1/LRP1 | 3 GO  |
| GO:0021543 | pallium development                                        | 8/212  | 166/17913 | 8.23E-04 | 3.92E-03 | 2.03E-03 | RHOA/CASP3/CRI  | 8 GO  |
| GO:1901215 | negative regulation of neuron death                        | 9/212  | 207/17913 | 8.24E-04 | 3.92E-03 | 2.03E-03 | APOE/RHOA/CBL   | 9 GO  |
| GO:0046825 | regulation of protein export from nucleus                  | 4/212  | 36/17913  | 8.35E-04 | 3.96E-03 | 2.05E-03 | PPM1A/PRKACA/   | 4 GO  |
| GO:0071634 | regulation of transforming growth factor beta production   | 4/212  | 36/17913  | 8.35E-04 | 3.96E-03 | 2.05E-03 | SMAD3/SMAD4/    | 4 GO  |
| GO:0090313 | regulation of protein targeting to membrane                | 4/212  | 36/17913  | 8.35E-04 | 3.96E-03 | 2.05E-03 | ERBB2/ITGB2/PA  | 4 GO  |
| GO:0031668 | cellular response to extracellular stimulus                | 10/212 | 251/17913 | 8.40E-04 | 3.98E-03 | 2.06E-03 | CASR/CBL/JUN/L  | 10 GO |
| GO:0032200 | telomere organization                                      | 8/212  | 167/17913 | 8.56E-04 | 4.05E-03 | 2.10E-03 | PARP1/APEX1/M   | 8 GO  |
| GO:0050808 | synapse organization                                       | 13/212 | 394/17913 | 8.66E-04 | 4.09E-03 | 2.12E-03 | ABL1/APOE/RHO   | 13 GO |
| GO:0051260 | protein homooligomerization                                | 12/212 | 345/17913 | 8.66E-04 | 4.09E-03 | 2.12E-03 | ACTN2/APC/APO   | 12 GO |
| GO:0032231 | regulation of actin filament bundle assembly               | 6/212  | 94/17913  | 8.77E-04 | 4.13E-03 | 2.14E-03 | ABL1/RHOA/RHO   | 6 GO  |
| GO:0048709 | oligodendrocyte differentiation                            | 6/212  | 94/17913  | 8.77E-04 | 4.13E-03 | 2.14E-03 | ERBB2/GLI3/HDA  | 6 GO  |
| GO:0050854 | regulation of antigen receptor-mediated signaling pathway  | 5/212  | 63/17913  | 8.92E-04 | 4.19E-03 | 2.17E-03 | DUSP3/LYN/PRKC  | 5 GO  |
| GO:0050921 | positive regulation of chemotaxis                          | 7/212  | 130/17913 | 9.11E-04 | 4.28E-03 | 2.22E-03 | CASR/PTK2B/SM   | 7 GO  |
| GO:0010951 | negative regulation of endopeptidase activity              | 9/212  | 210/17913 | 9.12E-04 | 4.28E-03 | 2.22E-03 | CD44/PEBP1/SER  | 9 GO  |
| GO:0010614 | negative regulation of cardiac muscle hypertrophy          | 4/212  | 37/17913  | 9.27E-04 | 4.33E-03 | 2.24E-03 | SMAD3/SMAD4/I   | 4 GO  |
| GO:0010955 | negative regulation of protein processing                  | 4/212  | 37/17913  | 9.27E-04 | 4.33E-03 | 2.24E-03 | CD59/SERPINE1/I | 4 GO  |
| GO:1903318 | negative regulation of protein maturation                  | 4/212  | 37/17913  | 9.27E-04 | 4.33E-03 | 2.24E-03 | CD59/SERPINE1/I | 4 GO  |
| GO:0008585 | female gonad development                                   | 6/212  | 95/17913  | 9.28E-04 | 4.33E-03 | 2.24E-03 | CASP3/KIT/SMAD  | 6 GO  |
| GO:0060993 | kidney morphogenesis                                       | 6/212  | 95/17913  | 9.28E-04 | 4.33E-03 | 2.24E-03 | GLI3/SMAD4/MY   | 6 GO  |
| GO:0042770 | signal transduction in response to DNA damage              | 7/212  | 131/17913 | 9.53E-04 | 4.44E-03 | 2.30E-03 | ABL1/CD44/DDX5  | 7 GO  |
| GO:0015909 | long-chain fatty acid transport                            | 5/212  | 64/17913  | 9.58E-04 | 4.45E-03 | 2.31E-03 | APOE/PLA2G1B/F  | 5 GO  |
| GO:0019915 | lipid storage                                              | 5/212  | 64/17913  | 9.58E-04 | 4.45E-03 | 2.31E-03 | APOB/APOE/ITGE  | 5 GO  |
| GO:0030177 | positive regulation of Wnt signaling pathway               | 8/212  | 170/17913 | 9.61E-04 | 4.46E-03 | 2.31E-03 | ABL1/DAB2/JUP/  | 8 GO  |
| GO:0043583 | ear development                                            | 9/212  | 212/17913 | 9.75E-04 | 4.51E-03 | 2.34E-03 | GLI3/PAX2/PDGF  | 9 GO  |
| GO:0030219 | megakaryocyte differentiation                              | 6/212  | 96/17913  | 9.80E-04 | 4.51E-03 | 2.34E-03 | EP300/HDAC1/KI  | 6 GO  |
| GO:0034199 | activation of protein kinase A activity                    | 3/212  | 17/17913  | 9.83E-04 | 4.51E-03 | 2.34E-03 | PRKACA/PRKAR1   | 3 GO  |
| GO:0042953 | lipoprotein transport                                      | 3/212  | 17/17913  | 9.83E-04 | 4.51E-03 | 2.34E-03 | APOB/LRP1/PRKC  | 3 GO  |
| GO:0043923 | positive regulation by host of viral transcription         | 3/212  | 17/17913  | 9.83E-04 | 4.51E-03 | 2.34E-03 | EP300/JUN/SP1   | 3 GO  |
| GO:0044872 | lipoprotein localization                                   | 3/212  | 17/17913  | 9.83E-04 | 4.51E-03 | 2.34E-03 | APOB/LRP1/PRKC  | 3 GO  |
| GO:0045056 | transcytosis                                               | 3/212  | 17/17913  | 9.83E-04 | 4.51E-03 | 2.34E-03 | LRP1/RAB5A/SRC  | 3 GO  |
| GO:0048532 | anatomical structure arrangement                           | 3/212  | 17/17913  | 9.83E-04 | 4.51E-03 | 2.34E-03 | KCNA2/PAX2/TFA  | 3 GO  |
| GO:0055003 | cardiac myofibril assembly                                 | 3/212  | 17/17913  | 9.83E-04 | 4.51E-03 | 2.34E-03 | SMAD4/PDGFR/    | 3 GO  |
| GO:0060438 | trachea development                                        | 3/212  | 17/17913  | 9.83E-04 | 4.51E-03 | 2.34E-03 | MAPK1/MAPK3/M   | 3 GO  |
| GO:0048565 | digestive tract development                                | 7/212  | 132/17913 | 9.96E-04 | 4.57E-03 | 2.37E-03 | CRKL/GLI3/KIT/S | 7 GO  |
| GO:0006284 | base-excision repair                                       | 4/212  | 38/17913  | 1.03E-03 | 4.67E-03 | 2.42E-03 | APEX1/PCNA/POI  | 4 GO  |
| GO:0016572 | histone phosphorylation                                    | 4/212  | 38/17913  | 1.03E-03 | 4.67E-03 | 2.42E-03 | PRKCA/PRKCB/PR  | 4 GO  |
| GO:0043277 | apoptotic cell clearance                                   | 4/212  | 38/17913  | 1.03E-03 | 4.67E-03 | 2.42E-03 | ITGB3/LRP1/THB  | 4 GO  |
| GO:0071604 | transforming growth factor beta production                 | 4/212  | 38/17913  | 1.03E-03 | 4.67E-03 | 2.42E-03 | SMAD3/SMAD4/    | 4 GO  |
| GO:0071867 | response to monoamine                                      | 4/212  | 38/17913  | 1.03E-03 | 4.67E-03 | 2.42E-03 | ABL1/PRKACA/M.  | 4 GO  |
| GO:0071869 | response to catecholamine                                  | 4/212  | 38/17913  | 1.03E-03 | 4.67E-03 | 2.42E-03 | ABL1/PRKACA/M.  | 4 GO  |
| GO:0032945 | negative regulation of mononuclear cell proliferation      | 5/212  | 65/17913  | 1.03E-03 | 4.67E-03 | 2.42E-03 | CASP3/ERBB2/INI | 5 GO  |
| GO:0050672 | negative regulation of lymphocyte proliferation            | 5/212  | 65/17913  | 1.03E-03 | 4.67E-03 | 2.42E-03 | CASP3/ERBB2/INI | 5 GO  |
| GO:0071242 | cellular response to ammonium ion                          | 5/212  | 65/17913  | 1.03E-03 | 4.67E-03 | 2.42E-03 | ABL1/CASP3/CRK  | 5 GO  |
| GO:0048193 | Golgi vesicle transport                                    | 11/212 | 304/17913 | 1.03E-03 | 4.67E-03 | 2.42E-03 | CD59/DCTN1/F2/  | 11 GO |
| GO:0006888 | ER to Golgi vesicle-mediated transport                     | 8/212  | 172/17913 | 1.04E-03 | 4.69E-03 | 2.43E-03 | CD59/DCTN1/F2/  | 8 GO  |
| GO:0043123 | positive regulation of I-kappaB kinase/NF-kappaB signaling | 8/212  | 172/17913 | 1.04E-03 | 4.69E-03 | 2.43E-03 | ABL1/RHOA/RHO   | 8 GO  |

|            |                                                                                      |        |           |          |          |          |                       |       |
|------------|--------------------------------------------------------------------------------------|--------|-----------|----------|----------|----------|-----------------------|-------|
| GO:0046631 | alpha-beta T cell activation                                                         | 7/212  | 133/17913 | 1.04E-03 | 4.71E-03 | 2.44E-03 | ABL1/RHOA/GLI3        | 7 GO  |
| GO:0007517 | muscle organ development                                                             | 13/212 | 403/17913 | 1.06E-03 | 4.80E-03 | 2.49E-03 | RHOA/DDX5/EP300       | 13 GO |
| GO:0070613 | regulation of protein processing                                                     | 8/212  | 173/17913 | 1.08E-03 | 4.84E-03 | 2.51E-03 | CD59/F2/SERPINE1      | 8 GO  |
| GO:0071478 | cellular response to radiation                                                       | 8/212  | 173/17913 | 1.08E-03 | 4.84E-03 | 2.51E-03 | PARP1/RHOB/EP300      | 8 GO  |
| GO:0046578 | regulation of Ras protein signal transduction                                        | 9/212  | 215/17913 | 1.08E-03 | 4.84E-03 | 2.51E-03 | ABL1/APOE/CBL/PTEN    | 9 GO  |
| GO:0010769 | regulation of cell morphogenesis involved in differentiation                         | 10/212 | 260/17913 | 1.10E-03 | 4.93E-03 | 2.56E-03 | ABL1/APOE/RHOA        | 10 GO |
| GO:0043030 | regulation of macrophage activation                                                  | 5/212  | 66/17913  | 1.10E-03 | 4.94E-03 | 2.56E-03 | ITGB2/LDLR/THBS1      | 5 GO  |
| GO:0060675 | ureteric bud morphogenesis                                                           | 5/212  | 66/17913  | 1.10E-03 | 4.94E-03 | 2.56E-03 | GLI3/SMAD4/MYD88      | 5 GO  |
| GO:0045666 | positive regulation of neuron differentiation                                        | 12/212 | 355/17913 | 1.11E-03 | 4.96E-03 | 2.57E-03 | APOE/RHOA/DLG4        | 12 GO |
| GO:0014741 | negative regulation of muscle hypertrophy                                            | 4/212  | 39/17913  | 1.13E-03 | 5.08E-03 | 2.63E-03 | SMAD3/SMAD4/ID1       | 4 GO  |
| GO:0045930 | negative regulation of mitotic cell cycle                                            | 11/212 | 308/17913 | 1.14E-03 | 5.11E-03 | 2.65E-03 | ABL1/APC/CCND1        | 11 GO |
| GO:0010596 | negative regulation of endothelial cell migration                                    | 6/212  | 99/17913  | 1.15E-03 | 5.14E-03 | 2.66E-03 | APOE/RHOA/JUP, FAK    | 6 GO  |
| GO:1903317 | regulation of protein maturation                                                     | 8/212  | 175/17913 | 1.16E-03 | 5.17E-03 | 2.68E-03 | CD59/F2/SERPINE1      | 8 GO  |
| GO:0006346 | methylation-dependent chromatin silencing                                            | 3/212  | 18/17913  | 1.17E-03 | 5.20E-03 | 2.69E-03 | HDAC1/SETDB1/MLL2     | 3 GO  |
| GO:0010888 | negative regulation of lipid storage                                                 | 3/212  | 18/17913  | 1.17E-03 | 5.20E-03 | 2.69E-03 | ITGB3/PPARA/NR1H3     | 3 GO  |
| GO:0051895 | negative regulation of focal adhesion assembly                                       | 3/212  | 18/17913  | 1.17E-03 | 5.20E-03 | 2.69E-03 | LRP1/SRC/THBS1        | 3 GO  |
| GO:0042531 | positive regulation of tyrosine phosphorylation of STAT protein                      | 5/212  | 67/17913  | 1.18E-03 | 5.22E-03 | 2.71E-03 | IL6ST/KIT/LYN/OSR1    | 5 GO  |
| GO:0045669 | positive regulation of osteoblast differentiation                                    | 5/212  | 67/17913  | 1.18E-03 | 5.22E-03 | 2.71E-03 | GLI3/IL6ST/JUND, ID1  | 5 GO  |
| GO:0070227 | lymphocyte apoptotic process                                                         | 5/212  | 67/17913  | 1.18E-03 | 5.22E-03 | 2.71E-03 | CRKL/GLI3/RAG1, PI3K  | 5 GO  |
| GO:0072171 | mesonephric tubule morphogenesis                                                     | 5/212  | 67/17913  | 1.18E-03 | 5.22E-03 | 2.71E-03 | GLI3/SMAD4/MYD88      | 5 GO  |
| GO:0050807 | regulation of synapse organization                                                   | 9/212  | 218/17913 | 1.19E-03 | 5.24E-03 | 2.72E-03 | ABL1/APOE/RHOA        | 9 GO  |
| GO:0046545 | development of primary female sexual characteristics                                 | 6/212  | 100/17913 | 1.21E-03 | 5.35E-03 | 2.77E-03 | CASP3/KIT/SMAD3       | 6 GO  |
| GO:2000045 | regulation of G1/S transition of mitotic cell cycle                                  | 8/212  | 177/17913 | 1.25E-03 | 5.50E-03 | 2.85E-03 | APEX1/CCND1/EF2       | 8 GO  |
| GO:0042987 | amyloid precursor protein catabolic process                                          | 4/212  | 40/17913  | 1.25E-03 | 5.50E-03 | 2.85E-03 | APOE/CASP3/LYN        | 4 GO  |
| GO:0051281 | positive regulation of release of sequestered calcium ion into cytosol               | 4/212  | 40/17913  | 1.25E-03 | 5.50E-03 | 2.85E-03 | ABL1/F2/PKD2/PI3K     | 4 GO  |
| GO:0032436 | positive regulation of proteasomal ubiquitin-dependent protein catabolic process     | 5/212  | 68/17913  | 1.26E-03 | 5.54E-03 | 2.87E-03 | DAB2/SMAD7/PLC        | 5 GO  |
| GO:0042698 | ovulation cycle                                                                      | 5/212  | 68/17913  | 1.26E-03 | 5.54E-03 | 2.87E-03 | CASP3/PCNA/PDCD4      | 5 GO  |
| GO:0031669 | cellular response to nutrient levels                                                 | 9/212  | 220/17913 | 1.26E-03 | 5.54E-03 | 2.87E-03 | CASR/CBL/JUN/NF       | 9 GO  |
| GO:0036294 | cellular response to decreased oxygen levels                                         | 9/212  | 220/17913 | 1.26E-03 | 5.54E-03 | 2.87E-03 | CASR/CBL/EP300, HIF1A | 9 GO  |
| GO:0010770 | positive regulation of cell morphogenesis involved in differentiation                | 7/212  | 138/17913 | 1.29E-03 | 5.64E-03 | 2.92E-03 | ABL1/RHOA/CRKL        | 7 GO  |
| GO:0030879 | mammary gland development                                                            | 7/212  | 138/17913 | 1.29E-03 | 5.64E-03 | 2.92E-03 | CCND1/EPHA2/GRB2      | 7 GO  |
| GO:0044344 | cellular response to fibroblast growth factor stimulus                               | 7/212  | 138/17913 | 1.29E-03 | 5.64E-03 | 2.92E-03 | CBL/CD44/CRKL/FAK     | 7 GO  |
| GO:0031623 | receptor internalization                                                             | 6/212  | 102/17913 | 1.34E-03 | 5.85E-03 | 3.03E-03 | DLG4/ITGB2/ITGE1      | 6 GO  |
| GO:0050803 | regulation of synapse structure or activity                                          | 9/212  | 222/17913 | 1.35E-03 | 5.85E-03 | 3.03E-03 | ABL1/APOE/RHOA        | 9 GO  |
| GO:0071322 | cellular response to carbohydrate stimulus                                           | 7/212  | 139/17913 | 1.35E-03 | 5.85E-03 | 3.03E-03 | CASR/LRP1/PAX2        | 7 GO  |
| GO:0000281 | mitotic cytokinesis                                                                  | 5/212  | 69/17913  | 1.35E-03 | 5.85E-03 | 3.03E-03 | APC/RHOA/RHOE         | 5 GO  |
| GO:0070509 | calcium ion import                                                                   | 5/212  | 69/17913  | 1.35E-03 | 5.85E-03 | 3.03E-03 | CASR/PDGFRB/PLC       | 5 GO  |
| GO:0072210 | metanephric nephron development                                                      | 4/212  | 41/17913  | 1.37E-03 | 5.94E-03 | 3.08E-03 | PAX2/PDGFR/PI3K       | 4 GO  |
| GO:1903053 | regulation of extracellular matrix organization                                      | 4/212  | 41/17913  | 1.37E-03 | 5.94E-03 | 3.08E-03 | ABL1/LRP1/SMAD3       | 4 GO  |
| GO:0030949 | positive regulation of vascular endothelial growth factor receptor signaling pathway | 3/212  | 19/17913  | 1.38E-03 | 5.94E-03 | 3.08E-03 | GRB10/ITGB3/PRK       | 3 GO  |
| GO:0032042 | mitochondrial DNA metabolic process                                                  | 3/212  | 19/17913  | 1.38E-03 | 5.94E-03 | 3.08E-03 | PARP1/TP53/DNA        | 3 GO  |
| GO:0050860 | negative regulation of T cell receptor signaling pathway                             | 3/212  | 19/17913  | 1.38E-03 | 5.94E-03 | 3.08E-03 | DUSP3/PRNP/PTF        | 3 GO  |
| GO:1903392 | negative regulation of adherens junction organization                                | 3/212  | 19/17913  | 1.38E-03 | 5.94E-03 | 3.08E-03 | LRP1/SRC/THBS1        | 3 GO  |
| GO:1903798 | regulation of production of miRNAs involved in gene silencing by miRNA               | 3/212  | 19/17913  | 1.38E-03 | 5.94E-03 | 3.08E-03 | DDX5/MAP2K1/T         | 3 GO  |
| GO:0010466 | negative regulation of peptidase activity                                            | 9/212  | 223/17913 | 1.39E-03 | 5.98E-03 | 3.10E-03 | CD44/PEBP1/SER        | 9 GO  |
| GO:0001837 | epithelial to mesenchymal transition                                                 | 7/212  | 140/17913 | 1.40E-03 | 6.04E-03 | 3.13E-03 | DAB2/DDX5/SMA         | 7 GO  |
| GO:0048524 | positive regulation of viral process                                                 | 6/212  | 103/17913 | 1.41E-03 | 6.07E-03 | 3.15E-03 | APOE/CD4/EP300        | 6 GO  |
| GO:0000082 | G1/S transition of mitotic cell cycle                                                | 10/212 | 269/17913 | 1.42E-03 | 6.09E-03 | 3.15E-03 | APEX1/CCND1/EF        | 10 GO |
| GO:0043122 | regulation of I-kappaB kinase/NF-kappaB signaling                                    | 9/212  | 224/17913 | 1.43E-03 | 6.14E-03 | 3.18E-03 | ABL1/RHOA/RHO         | 9 GO  |

|            |                                                             |        |           |          |          |          |                  |       |
|------------|-------------------------------------------------------------|--------|-----------|----------|----------|----------|------------------|-------|
| GO:0010721 | negative regulation of cell development                     | 11/212 | 317/17913 | 1.44E-03 | 6.18E-03 | 3.20E-03 | APOE/RHOA/F2/C   | 11 GO |
| GO:0003002 | regionalization                                             | 11/212 | 318/17913 | 1.48E-03 | 6.33E-03 | 3.28E-03 | CRKL/EP300/GLI3  | 11 GO |
| GO:0009952 | anterior/posterior pattern specification                    | 8/212  | 182/17913 | 1.49E-03 | 6.36E-03 | 3.29E-03 | CRKL/EP300/GLI3  | 8 GO  |
| GO:0051216 | cartilage development                                       | 8/212  | 182/17913 | 1.49E-03 | 6.36E-03 | 3.29E-03 | CD44/GLI3/SMAC   | 8 GO  |
| GO:0010863 | positive regulation of phospholipase C activity             | 4/212  | 42/17913  | 1.50E-03 | 6.40E-03 | 3.32E-03 | KIT/PDGFR/PDG    | 4 GO  |
| GO:0045429 | positive regulation of nitric oxide biosynthetic process    | 4/212  | 42/17913  | 1.50E-03 | 6.40E-03 | 3.32E-03 | PTK2B/ITGB2/SM   | 4 GO  |
| GO:0001678 | cellular glucose homeostasis                                | 7/212  | 142/17913 | 1.52E-03 | 6.48E-03 | 3.36E-03 | CASR/LRP1/PAX2   | 7 GO  |
| GO:0007612 | learning                                                    | 7/212  | 142/17913 | 1.52E-03 | 6.48E-03 | 3.36E-03 | BCHE/DLG4/JUN/   | 7 GO  |
| GO:0006305 | DNA alkylation                                              | 5/212  | 71/17913  | 1.53E-03 | 6.50E-03 | 3.37E-03 | PARP1/MYC/SPI1   | 5 GO  |
| GO:0006306 | DNA methylation                                             | 5/212  | 71/17913  | 1.53E-03 | 6.50E-03 | 3.37E-03 | PARP1/MYC/SPI1   | 5 GO  |
| GO:0030500 | regulation of bone mineralization                           | 5/212  | 71/17913  | 1.53E-03 | 6.50E-03 | 3.37E-03 | PTK2B/NBR1/SM    | 5 GO  |
| GO:0016570 | histone modification                                        | 13/212 | 420/17913 | 1.54E-03 | 6.53E-03 | 3.38E-03 | EP300/HDAC1/SA   | 13 GO |
| GO:0002688 | regulation of leukocyte chemotaxis                          | 6/212  | 105/17913 | 1.56E-03 | 6.59E-03 | 3.42E-03 | PTK2B/LYN/CCN3   | 6 GO  |
| GO:0045446 | endothelial cell differentiation                            | 6/212  | 105/17913 | 1.56E-03 | 6.59E-03 | 3.42E-03 | CDH5/SMAD4/PE    | 6 GO  |
| GO:0042593 | glucose homeostasis                                         | 9/212  | 227/17913 | 1.57E-03 | 6.63E-03 | 3.43E-03 | CASR/LRP1/PAX2   | 9 GO  |
| GO:0055123 | digestive system development                                | 7/212  | 143/17913 | 1.58E-03 | 6.68E-03 | 3.46E-03 | CRKL/GLI3/KIT/SM | 7 GO  |
| GO:0106106 | cold-induced thermogenesis                                  | 7/212  | 143/17913 | 1.58E-03 | 6.68E-03 | 3.46E-03 | APC/GRB10/PRLR   | 7 GO  |
| GO:0120161 | regulation of cold-induced thermogenesis                    | 7/212  | 143/17913 | 1.58E-03 | 6.68E-03 | 3.46E-03 | APC/GRB10/PRLR   | 7 GO  |
| GO:0043586 | tongue development                                          | 3/212  | 20/17913  | 1.61E-03 | 6.76E-03 | 3.50E-03 | GLI3/HDAC1/KIT   | 3 GO  |
| GO:0033500 | carbohydrate homeostasis                                    | 9/212  | 228/17913 | 1.62E-03 | 6.80E-03 | 3.52E-03 | CASR/LRP1/PAX2   | 9 GO  |
| GO:0035019 | somatic stem cell population maintenance                    | 5/212  | 72/17913  | 1.63E-03 | 6.80E-03 | 3.52E-03 | KIT/SMAD2/SMAI   | 5 GO  |
| GO:0050772 | positive regulation of axonogenesis                         | 5/212  | 72/17913  | 1.63E-03 | 6.80E-03 | 3.52E-03 | RHOA/LRP1/PAK1   | 5 GO  |
| GO:1990266 | neutrophil migration                                        | 5/212  | 72/17913  | 1.63E-03 | 6.80E-03 | 3.52E-03 | ITGB2/PECAM1/P   | 5 GO  |
| GO:0021761 | limbic system development                                   | 6/212  | 106/17913 | 1.64E-03 | 6.80E-03 | 3.52E-03 | CASP3/CRKL/GLI3  | 6 GO  |
| GO:0043279 | response to alkaloid                                        | 6/212  | 106/17913 | 1.64E-03 | 6.80E-03 | 3.52E-03 | BCHE/CASP3/PTK   | 6 GO  |
| GO:0098693 | regulation of synaptic vesicle cycle                        | 6/212  | 106/17913 | 1.64E-03 | 6.80E-03 | 3.52E-03 | PRKAR1B/PRKCB/   | 6 GO  |
| GO:0010613 | positive regulation of cardiac muscle hypertrophy           | 4/212  | 43/17913  | 1.64E-03 | 6.80E-03 | 3.52E-03 | PARP1/IL6ST/PRK  | 4 GO  |
| GO:0010761 | fibroblast migration                                        | 4/212  | 43/17913  | 1.64E-03 | 6.80E-03 | 3.52E-03 | CCN3/PAK1/PRKC   | 4 GO  |
| GO:0010883 | regulation of lipid storage                                 | 4/212  | 43/17913  | 1.64E-03 | 6.80E-03 | 3.52E-03 | APOB/ITGB3/PPA   | 4 GO  |
| GO:0043300 | regulation of leukocyte degranulation                       | 4/212  | 43/17913  | 1.64E-03 | 6.80E-03 | 3.52E-03 | FGR/ITGB2/LYN/S  | 4 GO  |
| GO:0043303 | mast cell degranulation                                     | 4/212  | 43/17913  | 1.64E-03 | 6.80E-03 | 3.52E-03 | CBL/FGR/KIT/LYN  | 4 GO  |
| GO:0050850 | positive regulation of calcium-mediated signaling           | 4/212  | 43/17913  | 1.64E-03 | 6.80E-03 | 3.52E-03 | CD4/PKD2/SYK/Z   | 4 GO  |
| GO:0051154 | negative regulation of striated muscle cell differentiation | 4/212  | 43/17913  | 1.64E-03 | 6.80E-03 | 3.52E-03 | SMAD4/CCN3/PA    | 4 GO  |
| GO:1904407 | positive regulation of nitric oxide metabolic process       | 4/212  | 43/17913  | 1.64E-03 | 6.80E-03 | 3.52E-03 | PTK2B/ITGB2/SM   | 4 GO  |
| GO:0043271 | negative regulation of ion transport                        | 7/212  | 144/17913 | 1.65E-03 | 6.83E-03 | 3.54E-03 | ACTN2/PTK2B/PK   | 7 GO  |
| GO:0002685 | regulation of leukocyte migration                           | 8/212  | 186/17913 | 1.71E-03 | 7.06E-03 | 3.66E-03 | RHOA/CRKL/PTK2   | 8 GO  |
| GO:0006959 | humoral immune response                                     | 10/212 | 276/17913 | 1.71E-03 | 7.08E-03 | 3.67E-03 | KLK3/CD59/F2/PL  | 10 GO |
| GO:0001938 | positive regulation of endothelial cell proliferation       | 6/212  | 107/17913 | 1.72E-03 | 7.08E-03 | 3.67E-03 | ITGB3/JUN/PLCG:  | 6 GO  |
| GO:0062014 | negative regulation of small molecule metabolic process     | 6/212  | 107/17913 | 1.72E-03 | 7.08E-03 | 3.67E-03 | PARP1/APOE/RHO   | 6 GO  |
| GO:0042391 | regulation of membrane potential                            | 12/212 | 374/17913 | 1.72E-03 | 7.09E-03 | 3.67E-03 | ABL1/ACTN2/PAF   | 12 GO |
| GO:0043627 | response to estrogen                                        | 5/212  | 73/17913  | 1.73E-03 | 7.13E-03 | 3.69E-03 | CCND1/EP300/GL   | 5 GO  |
| GO:0014742 | positive regulation of muscle hypertrophy                   | 4/212  | 44/17913  | 1.79E-03 | 7.34E-03 | 3.80E-03 | PARP1/IL6ST/PRK  | 4 GO  |
| GO:0071827 | plasma lipoprotein particle organization                    | 4/212  | 44/17913  | 1.79E-03 | 7.34E-03 | 3.80E-03 | APOB/APOE/PLA:   | 4 GO  |
| GO:0030282 | bone mineralization                                         | 6/212  | 108/17913 | 1.80E-03 | 7.38E-03 | 3.82E-03 | PTK2B/FGR/NBR1   | 6 GO  |
| GO:0071156 | regulation of cell cycle arrest                             | 6/212  | 108/17913 | 1.80E-03 | 7.38E-03 | 3.82E-03 | CCND1/EP300/PC   | 6 GO  |
| GO:1901990 | regulation of mitotic cell cycle phase transition           | 13/212 | 428/17913 | 1.82E-03 | 7.45E-03 | 3.86E-03 | APC/APEX1/CCNI   | 13 GO |
| GO:0051258 | protein polymerization                                      | 9/212  | 232/17913 | 1.82E-03 | 7.45E-03 | 3.86E-03 | ABL1/RHOA/DCTI   | 9 GO  |
| GO:0021675 | nerve development                                           | 5/212  | 74/17913  | 1.84E-03 | 7.52E-03 | 3.90E-03 | GLI3/KCNA2/PAX   | 5 GO  |
| GO:0007093 | mitotic cell cycle checkpoint                               | 7/212  | 147/17913 | 1.85E-03 | 7.52E-03 | 3.90E-03 | APC/CCND1/EP3C   | 7 GO  |

|            |                                                                                  |        |           |          |          |          |                 |       |
|------------|----------------------------------------------------------------------------------|--------|-----------|----------|----------|----------|-----------------|-------|
| GO:0008064 | regulation of actin polymerization or depolymerization                           | 7/212  | 147/17913 | 1.85E-03 | 7.52E-03 | 3.90E-03 | ACTN2/RHOA/PTI  | 7 GO  |
| GO:0032373 | positive regulation of sterol transport                                          | 3/212  | 21/17913  | 1.86E-03 | 7.52E-03 | 3.90E-03 | APOE/LRP1/NR1F  | 3 GO  |
| GO:0032376 | positive regulation of cholesterol transport                                     | 3/212  | 21/17913  | 1.86E-03 | 7.52E-03 | 3.90E-03 | APOE/LRP1/NR1F  | 3 GO  |
| GO:0032462 | regulation of protein homooligomerization                                        | 3/212  | 21/17913  | 1.86E-03 | 7.52E-03 | 3.90E-03 | APOE/RHOC/SRC   | 3 GO  |
| GO:0032928 | regulation of superoxide anion generation                                        | 3/212  | 21/17913  | 1.86E-03 | 7.52E-03 | 3.90E-03 | ITGB2/PRKCD/SYI | 3 GO  |
| GO:0046827 | positive regulation of protein export from nucleus                               | 3/212  | 21/17913  | 1.86E-03 | 7.52E-03 | 3.90E-03 | PPM1A/PRKACA/   | 3 GO  |
| GO:0070920 | regulation of production of small RNA involved in gene silencing by RNA          | 3/212  | 21/17913  | 1.86E-03 | 7.52E-03 | 3.90E-03 | DDX5/MAP2K1/T   | 3 GO  |
| GO:0071498 | cellular response to fluid shear stress                                          | 3/212  | 21/17913  | 1.86E-03 | 7.52E-03 | 3.90E-03 | PTK2B/PKD2/SRC  | 3 GO  |
| GO:0008543 | fibroblast growth factor receptor signaling pathway                              | 6/212  | 109/17913 | 1.89E-03 | 7.62E-03 | 3.95E-03 | CBL/CRKL/MAPK1  | 6 GO  |
| GO:0072009 | nephron epithelium development                                                   | 6/212  | 109/17913 | 1.89E-03 | 7.62E-03 | 3.95E-03 | GLI3/SMAD4/MYI  | 6 GO  |
| GO:0016050 | vesicle organization                                                             | 10/212 | 280/17913 | 1.90E-03 | 7.69E-03 | 3.98E-03 | CD59/DLG4/F8/SI | 10 GO |
| GO:0030832 | regulation of actin filament length                                              | 7/212  | 148/17913 | 1.93E-03 | 7.78E-03 | 4.03E-03 | ACTN2/RHOA/PTI  | 7 GO  |
| GO:0002279 | mast cell activation involved in immune response                                 | 4/212  | 45/17913  | 1.94E-03 | 7.82E-03 | 4.05E-03 | CBL/FGR/KIT/LYN | 4 GO  |
| GO:0002448 | mast cell mediated immunity                                                      | 4/212  | 45/17913  | 1.94E-03 | 7.82E-03 | 4.05E-03 | CBL/FGR/KIT/LYN | 4 GO  |
| GO:0032570 | response to progesterone                                                         | 4/212  | 45/17913  | 1.94E-03 | 7.82E-03 | 4.05E-03 | SRC/THBS1/NCOA  | 4 GO  |
| GO:0031100 | animal organ regeneration                                                        | 5/212  | 75/17913  | 1.95E-03 | 7.84E-03 | 4.06E-03 | CCND1/GLI3/PCN  | 5 GO  |
| GO:0048678 | response to axon injury                                                          | 5/212  | 75/17913  | 1.95E-03 | 7.84E-03 | 4.06E-03 | JUN/LRP1/LYN/M  | 5 GO  |
| GO:0072078 | nephron tubule morphogenesis                                                     | 5/212  | 75/17913  | 1.95E-03 | 7.84E-03 | 4.06E-03 | GLI3/SMAD4/MYI  | 5 GO  |
| GO:0032434 | regulation of proteasomal ubiquitin-dependent protein catabolic process          | 6/212  | 110/17913 | 1.98E-03 | 7.92E-03 | 4.10E-03 | ARAF/DAB2/SMA   | 6 GO  |
| GO:1901991 | negative regulation of mitotic cell cycle phase transition                       | 9/212  | 235/17913 | 1.99E-03 | 7.96E-03 | 4.12E-03 | APC/CCND1/EP3C  | 9 GO  |
| GO:1902803 | regulation of synaptic vesicle transport                                         | 5/212  | 76/17913  | 2.07E-03 | 8.28E-03 | 4.29E-03 | PRKCB/PRKCG/R   | 5 GO  |
| GO:0071453 | cellular response to oxygen levels                                               | 9/212  | 237/17913 | 2.10E-03 | 8.39E-03 | 4.35E-03 | CASR/CBL/EP300, | 9 GO  |
| GO:0030514 | negative regulation of BMP signaling pathway                                     | 4/212  | 46/17913  | 2.11E-03 | 8.39E-03 | 4.35E-03 | ABL1/SMAD7/PPI  | 4 GO  |
| GO:0031638 | zymogen activation                                                               | 4/212  | 46/17913  | 2.11E-03 | 8.39E-03 | 4.35E-03 | SERPINE1/PLAT/F | 4 GO  |
| GO:0031648 | protein destabilization                                                          | 4/212  | 46/17913  | 2.11E-03 | 8.39E-03 | 4.35E-03 | EP300/PLK1/PRN  | 4 GO  |
| GO:0032369 | negative regulation of lipid transport                                           | 4/212  | 46/17913  | 2.11E-03 | 8.39E-03 | 4.35E-03 | ITGB3/PTPN11/TI | 4 GO  |
| GO:0070231 | T cell apoptotic process                                                         | 4/212  | 46/17913  | 2.11E-03 | 8.39E-03 | 4.35E-03 | GLI3/RAG1/TP53, | 4 GO  |
| GO:0021987 | cerebral cortex development                                                      | 6/212  | 112/17913 | 2.16E-03 | 8.60E-03 | 4.45E-03 | RHOA/CRKL/GLI3  | 6 GO  |
| GO:0030279 | negative regulation of ossification                                              | 5/212  | 77/17913  | 2.19E-03 | 8.68E-03 | 4.50E-03 | PTK2B/NBR1/SM   | 5 GO  |
| GO:0045685 | regulation of glial cell differentiation                                         | 5/212  | 77/17913  | 2.19E-03 | 8.68E-03 | 4.50E-03 | F2/HDAC1/IL6ST/ | 5 GO  |
| GO:0072088 | nephron epithelium morphogenesis                                                 | 5/212  | 77/17913  | 2.19E-03 | 8.68E-03 | 4.50E-03 | GLI3/SMAD4/MYI  | 5 GO  |
| GO:0090398 | cellular senescence                                                              | 5/212  | 77/17913  | 2.19E-03 | 8.68E-03 | 4.50E-03 | ABL1/PRKCD/MA   | 5 GO  |
| GO:0022411 | cellular component disassembly                                                   | 14/212 | 492/17913 | 2.24E-03 | 8.87E-03 | 4.60E-03 | ACTN2/APC/CASF  | 14 GO |
| GO:0071482 | cellular response to light stimulus                                              | 6/212  | 113/17913 | 2.26E-03 | 8.94E-03 | 4.63E-03 | PARP1/EP300/M   | 6 GO  |
| GO:0008542 | visual learning                                                                  | 4/212  | 47/17913  | 2.28E-03 | 8.99E-03 | 4.66E-03 | KIT/RAG1/PIAS1/ | 4 GO  |
| GO:0014911 | positive regulation of smooth muscle cell migration                              | 4/212  | 47/17913  | 2.28E-03 | 8.99E-03 | 4.66E-03 | LRP1/PAK1/PDGF  | 4 GO  |
| GO:0043124 | negative regulation of I-kappaB kinase/NF-kappaB signaling                       | 4/212  | 47/17913  | 2.28E-03 | 8.99E-03 | 4.66E-03 | ABL1/RHOA/HDA   | 4 GO  |
| GO:0051438 | regulation of ubiquitin-protein transferase activity                             | 4/212  | 47/17913  | 2.28E-03 | 8.99E-03 | 4.66E-03 | ABL1/SMAD7/PL   | 4 GO  |
| GO:0071824 | protein-DNA complex subunit organization                                         | 9/212  | 240/17913 | 2.29E-03 | 9.00E-03 | 4.66E-03 | PARP1/MYC/RAD   | 9 GO  |
| GO:1902806 | regulation of cell cycle G1/S phase transition                                   | 8/212  | 195/17913 | 2.29E-03 | 9.00E-03 | 4.66E-03 | APEX1/CCND1/EF  | 8 GO  |
| GO:0008589 | regulation of smoothened signaling pathway                                       | 5/212  | 78/17913  | 2.32E-03 | 9.10E-03 | 4.71E-03 | GLI3/PRRX1/PRK  | 5 GO  |
| GO:1905954 | positive regulation of lipid localization                                        | 5/212  | 78/17913  | 2.32E-03 | 9.10E-03 | 4.71E-03 | APOB/APOE/LRP:  | 5 GO  |
| GO:0044843 | cell cycle G1/S phase transition                                                 | 10/212 | 288/17913 | 2.34E-03 | 9.15E-03 | 4.74E-03 | APEX1/CCND1/EF  | 10 GO |
| GO:0030072 | peptide hormone secretion                                                        | 9/212  | 241/17913 | 2.36E-03 | 9.22E-03 | 4.78E-03 | CASR/LRP1/SMAI  | 9 GO  |
| GO:0043281 | regulation of cysteine-type endopeptidase activity involved in apoptotic process | 8/212  | 196/17913 | 2.37E-03 | 9.22E-03 | 4.78E-03 | RHOA/CD44/SMA   | 8 GO  |
| GO:0006304 | DNA modification                                                                 | 6/212  | 114/17913 | 2.37E-03 | 9.22E-03 | 4.78E-03 | PARP1/APEX1/M   | 6 GO  |
| GO:0042752 | regulation of circadian rhythm                                                   | 6/212  | 114/17913 | 2.37E-03 | 9.22E-03 | 4.78E-03 | KCNA2/PPARA/PI  | 6 GO  |
| GO:0046660 | female sex differentiation                                                       | 6/212  | 114/17913 | 2.37E-03 | 9.22E-03 | 4.78E-03 | CASP3/KIT/SMAD  | 6 GO  |
| GO:0031214 | biomineral tissue development                                                    | 7/212  | 154/17913 | 2.41E-03 | 9.39E-03 | 4.87E-03 | PTK2B/FGR/NBR1  | 7 GO  |

|            |                                                                                           |        |           |          |          |          |                  |       |
|------------|-------------------------------------------------------------------------------------------|--------|-----------|----------|----------|----------|------------------|-------|
| GO:0001945 | lymph vessel development                                                                  | 3/212  | 23/17913  | 2.43E-03 | 9.39E-03 | 4.87E-03 | EPHA2/SYK/NR2F   | 3 GO  |
| GO:0010758 | regulation of macrophage chemotaxis                                                       | 3/212  | 23/17913  | 2.43E-03 | 9.39E-03 | 4.87E-03 | PTK2B/MAPK3/TH   | 3 GO  |
| GO:0051882 | mitochondrial depolarization                                                              | 3/212  | 23/17913  | 2.43E-03 | 9.39E-03 | 4.87E-03 | ABL1/PARP1/SRC   | 3 GO  |
| GO:0060055 | angiogenesis involved in wound healing                                                    | 3/212  | 23/17913  | 2.43E-03 | 9.39E-03 | 4.87E-03 | ITGB3/SERPINE1/  | 3 GO  |
| GO:0072215 | regulation of metanephros development                                                     | 3/212  | 23/17913  | 2.43E-03 | 9.39E-03 | 4.87E-03 | MYC/PAX2/PDGF    | 3 GO  |
| GO:1902003 | regulation of amyloid-beta formation                                                      | 3/212  | 23/17913  | 2.43E-03 | 9.39E-03 | 4.87E-03 | APOE/CASP3/PRN   | 3 GO  |
| GO:2000637 | positive regulation of gene silencing by miRNA                                            | 3/212  | 23/17913  | 2.43E-03 | 9.39E-03 | 4.87E-03 | DDX5/MAP2K1/T    | 3 GO  |
| GO:2000726 | negative regulation of cardiac muscle cell differentiation                                | 3/212  | 23/17913  | 2.43E-03 | 9.39E-03 | 4.87E-03 | SMAD4/PAK1/PP    | 3 GO  |
| GO:0000075 | cell cycle checkpoint                                                                     | 8/212  | 197/17913 | 2.44E-03 | 9.42E-03 | 4.88E-03 | APC/CCND1/EP3C   | 8 GO  |
| GO:0010833 | telomere maintenance via telomere lengthening                                             | 5/212  | 79/17913  | 2.46E-03 | 9.43E-03 | 4.88E-03 | PARP1/MAPK1/N    | 5 GO  |
| GO:0032204 | regulation of telomere maintenance                                                        | 5/212  | 79/17913  | 2.46E-03 | 9.43E-03 | 4.88E-03 | PARP1/MYC/MAF    | 5 GO  |
| GO:0042509 | regulation of tyrosine phosphorylation of STAT protein                                    | 5/212  | 79/17913  | 2.46E-03 | 9.43E-03 | 4.88E-03 | IL6ST/KIT/LYN/OS | 5 GO  |
| GO:0043154 | negative regulation of cysteine-type endopeptidase activity involved in apoptotic process | 5/212  | 79/17913  | 2.46E-03 | 9.43E-03 | 4.88E-03 | CD44/PAX2/RAG1   | 5 GO  |
| GO:0061333 | renal tubule morphogenesis                                                                | 5/212  | 79/17913  | 2.46E-03 | 9.43E-03 | 4.88E-03 | GLI3/SMAD4/MY    | 5 GO  |
| GO:0001818 | negative regulation of cytokine production                                                | 10/212 | 290/17913 | 2.46E-03 | 9.43E-03 | 4.88E-03 | EPHA2/F2/INPP5I  | 10 GO |
| GO:0002762 | negative regulation of myeloid leukocyte differentiation                                  | 4/212  | 48/17913  | 2.47E-03 | 9.43E-03 | 4.88E-03 | INPP5D/LYN/MYC   | 4 GO  |
| GO:0010171 | body morphogenesis                                                                        | 4/212  | 48/17913  | 2.47E-03 | 9.43E-03 | 4.88E-03 | EP300/PDGFR/P    | 4 GO  |
| GO:0031103 | axon regeneration                                                                         | 4/212  | 48/17913  | 2.47E-03 | 9.43E-03 | 4.88E-03 | JUN/LRP1/MAP2I   | 4 GO  |
| GO:0048546 | digestive tract morphogenesis                                                             | 4/212  | 48/17913  | 2.47E-03 | 9.43E-03 | 4.88E-03 | GLI3/SMAD2/SM    | 4 GO  |
| GO:0071825 | protein-lipid complex subunit organization                                                | 4/212  | 48/17913  | 2.47E-03 | 9.43E-03 | 4.88E-03 | APOB/APOE/PLA    | 4 GO  |
| GO:0042471 | ear morphogenesis                                                                         | 6/212  | 115/17913 | 2.47E-03 | 9.43E-03 | 4.88E-03 | PAX2/PRRX1/MA    | 6 GO  |
| GO:0043620 | regulation of DNA-templated transcription in response to stress                           | 6/212  | 115/17913 | 2.47E-03 | 9.43E-03 | 4.88E-03 | EP300/JUN/PSMA   | 6 GO  |
| GO:0021915 | neural tube development                                                                   | 7/212  | 155/17913 | 2.50E-03 | 9.53E-03 | 4.94E-03 | ABL1/EPHA2/GLI   | 7 GO  |
| GO:0031960 | response to corticosteroid                                                                | 7/212  | 155/17913 | 2.50E-03 | 9.53E-03 | 4.94E-03 | PARP1/RHOA/BC    | 7 GO  |
| GO:0010633 | negative regulation of epithelial cell migration                                          | 6/212  | 116/17913 | 2.58E-03 | 9.81E-03 | 5.08E-03 | APOE/RHOA/JUP,   | 6 GO  |
| GO:0032273 | positive regulation of protein polymerization                                             | 6/212  | 116/17913 | 2.58E-03 | 9.81E-03 | 5.08E-03 | RHOA/DCTN1/PT    | 6 GO  |
| GO:0001906 | cell killing                                                                              | 7/212  | 156/17913 | 2.59E-03 | 9.84E-03 | 5.10E-03 | CD59/F2/PTPN6/I  | 7 GO  |
| GO:0070304 | positive regulation of stress-activated protein kinase signaling cascade                  | 7/212  | 156/17913 | 2.59E-03 | 9.84E-03 | 5.10E-03 | PTK2B/LYN/PAK1   | 7 GO  |
| GO:0034764 | positive regulation of transmembrane transport                                            | 8/212  | 199/17913 | 2.60E-03 | 9.84E-03 | 5.10E-03 | ABL1/ACTN2/F2/I  | 8 GO  |

**Supplementary Table 9.** Coefficients for all prediction models using the toxicity module.

| <b>Model coefficients</b> | <b>Maximal toxicity</b> | <b>Neutropenia</b> | <b>Leukopenia</b> | <b>Thrombocytopenia</b> |
|---------------------------|-------------------------|--------------------|-------------------|-------------------------|
| (Intercept)               | -10.4875342             | -12.01963533       | -2.508590599      | -0.323189363            |
| rs10898940                | 0.497946656             | 0.55195109         | 0.090056227       | 0.069250252             |
| rs11629627                | 0.187098557             | 0.370523357        | 0.065096288       | 0.041418253             |
| rs11629694                | 0.182897089             | 0.364594862        | 0.069821684       | 0.045260368             |
| rs11794611                | -0.183345821            | -0.496607834       | -0.06210544       | -0.049861904            |
| rs11996440                | -0.250042367            | -0.250393934       | -0.050363849      | -0.028587538            |
| rs12034981                | -0.287606968            | -0.268034264       | -0.050384676      | -0.028587378            |
| rs12046258                | -0.824095051            | -0.309870137       | -0.038373666      | -0.06282415             |
| rs12117788                | -0.892453588            | -0.695199766       | -0.080109069      | -0.125644995            |
| rs1247572                 | -1.281081728            | -0.452196964       | -0.074173234      | -0.125640864            |
| rs12981050                | -0.223789244            | 0.016180507        | -0.018274816      | -0.078694735            |
| rs13431476                | -0.349797118            | 0.353866724        | -0.022702559      | -0.062714409            |
| rs1367216                 | 0.561322604             | 0.46149159         | 0.073192813       | 0.067967017             |
| rs1498830                 | 0.246854276             | 0.309196126        | 0.030136621       | 0.061410388             |
| rs1652456                 | 0.254474915             | 0.323808562        | 0.03735319        | 0.069053027             |
| rs1740430                 | 0.25496169              | 0.325358739        | 0.037352971       | 0.0690503               |
| rs17404301                | 0.255595641             | 0.326844238        | 0.037352761       | 0.069047794             |
| rs2465836                 | 0.370742434             | 0.258490844        | 0.021081853       | 0.061407768             |
| rs2569538                 | 0.265999967             | 0.257349992        | 0.034689589       | 0.067674781             |
| rs2569543                 | 0.265593055             | 0.256278287        | 0.034689354       | 0.067672591             |
| rs2590763                 | -1.158371309            | -0.876418935       | -0.056411876      | -0.119210835            |
| rs2590807                 | 0.2579832               | 0.371930189        | 0.064941948       | 0.051974573             |
| rs2590827                 | 0.397774028             | 0.262369442        | 0.053678483       | 0.052484634             |
| rs2590829                 | 0.398275511             | 0.262195275        | 0.053678026       | 0.052482244             |
| rs2616405                 | 0.398900691             | 0.262240756        | 0.053677564       | 0.052480021             |
| rs2616431                 | 0.399303316             | 0.262433697        | 0.053677103       | 0.052477959             |
| rs2616433                 | -0.232232756            | -0.388160803       | -0.022422458      | -0.080886555            |
| rs34285220                | 1.32941569              | 0.863159688        | 0.057540746       | 0.12517169              |
| rs4864488                 | 0.913501478             | 1.333991665        | 0.171027056       | 0.054145953             |
| rs4864820                 | 0.007836103             | 0.214937319        | 0.054695302       | 0.00654473              |
| rs531650                  | 0.867333871             | 0.913848959        | 0.109611374       | 0.007313413             |
| rs5858236                 | 0.868616326             | 0.912977532        | 0.109610769       | 0.007313781             |
| rs5858241                 | 0.870270853             | 0.912631962        | 0.109610223       | 0.007314117             |
| rs58982282                | -0.431942613            | -0.159113741       | -0.012668171      | -0.058236367            |
| rs59065201                | 0.080999027             | -0.970944868       | -0.043108517      | -0.035923388            |
| rs59481386                | 0.211350701             | 0.445594974        | 0.06360493        | 0.029834988             |
| rs61825739                | 0.211378623             | 0.445398835        | 0.063604534       | 0.029833633             |
| rs62225956                | 0.211650594             | 0.445675441        | 0.063604131       | 0.029832363             |
| rs62225957                | 0.211925305             | 0.44593192         | 0.063603729       | 0.029831159             |
| rs62225958                | 0.465695378             | -0.238929746       | 0.082159532       | 0.068456301             |
| rs62436699                | -0.01589277             | -1.004746862       | -0.071438525      | -0.08164559             |
| rs66628040                | -0.52764896             | -0.712643953       | -0.032358733      | -0.084026152            |
| rs67425308                | -0.030931153            | -0.68844837        | -0.067672847      | -0.046493077            |
| rs6815433                 | 0.598636455             | 0.406298085        | 0.090414168       | 0.067232386             |
| rs6826915                 | 0.59849942              | 0.405917604        | 0.090413768       | 0.067230446             |
| rs6828755                 | -0.164030703            | -0.533748646       | -0.059957538      | -0.041154058            |
| rs6842780                 | -0.11788161             | -0.341937487       | -0.064294807      | -0.052828328            |
| rs6877573                 | 0.367420051             | 0.007005274        | 0.067588765       | 0.050870926             |

|            |              |              |              |              |
|------------|--------------|--------------|--------------|--------------|
| rs7184277  | 0.896987063  | -0.38973972  | -0.085924231 | 0.020246592  |
| rs7249753  | 1.453066675  | 0.997226712  | 0.134119299  | 0.1051765    |
| rs7256793  | 0.636793827  | 0.620085165  | 0.078125715  | 0.087178651  |
| rs72808733 | 0.266613733  | 0.449030187  | 0.07081102   | 0.059025779  |
| rs73559035 | 0.567884676  | 1.255515983  | 0.155659201  | 0.095151419  |
| rs7378471  | 0.568025535  | 1.255529112  | 0.155658571  | 0.095149521  |
| rs74464209 | 0.568108799  | 1.255950539  | 0.155657962  | 0.095147737  |
| rs7703879  | -0.235410184 | 0.085274883  | 0.003796867  | -0.0828088   |
| rs77321629 | -0.379354191 | -0.263518776 | -0.059143421 | -0.114600925 |
| rs77456162 | -0.379285209 | -0.263008857 | -0.059142983 | -0.11459542  |
| rs783176   | -0.379833438 | -0.262685648 | -0.059142552 | -0.114590176 |
| rs904414   | -0.380379555 | -0.262573743 | -0.059142141 | -0.114585238 |
| rs9626751  | -0.134605739 | -0.24944032  | -0.063269748 | -0.115993071 |
| rs9627100  | -0.134555191 | -0.249494629 | -0.063269394 | -0.115988646 |
| rs9759545  | -0.329501186 | -0.162577883 | -0.044399702 | -0.142632739 |

**Supplementary Table 10.** Number of high, low and intermediate toxicity based on the Common Terminology Criteria for Adverse Events (CTCAE) for the maximal toxicity, neutropenia, leukopenia, and thrombocytopenia, respectively. The table also shows the number of samples that were used for training and testing the model.

|                                        | Maximal Toxicity |          |      | Nuetropenia |          |      | Leukopenia |          |      | Thrombocytopenia |          |      |
|----------------------------------------|------------------|----------|------|-------------|----------|------|------------|----------|------|------------------|----------|------|
|                                        | Total            | Training | Test | Total       | Training | Test | Total      | Training | Test | Total            | Training | Test |
| <b>High toxicity (CTCAE 3-4)</b>       | 54               | 43       | 11   | 46          | 37       | 9    | 28         | 22       | 6    | 43               | 34       | 9    |
| <b>Low toxicity (CTCAE 0-1)</b>        | 34               | 27       | 7    | 44          | 35       | 9    | 46         | 37       | 9    | 39               | 31       | 8    |
| <b>Intermediate toxicity (CTCAE 2)</b> | 8                | -        | -    | 6           | -        | -    | 22         | -        | -    | 14               | -        | -    |
